# Supplementary material for: Multiomics Analysis of Spatially Distinct Stromal Cells Reveals Tumor-Induced O-Glycosylation of the CDK4–pRB Axis in Fibroblasts at the Invasive Tumor Edge
Source: Oxford University Press journal article supplement (doi:10.1158/0008-5472.can-21-1705), 2021-12-01
Supplement: can-21-1705_supplementary_data_s3_supps4.xlsx [file can-21-1705_supplementary_data_s3_supps4.xlsx]

## Sheet: Pathways Overlap
Pathways	HCC827 (NFs+TAFs+TCFs)	HCC827 (NFs+TAFs)	HCC827 (NFs+TCFs)	HCC827 (TAFs+TCFs)	HCC827 (NFs)	HCC827 (TAFs)	HCC827 (TCFs)
Leukocyte Extravasation Signaling	Leukocyte Extravasation Signaling	NA	NA	NA	NA	NA	NA
Role of Pattern Recognition Receptors in Recognition of Bacteria and Viruses	Role of Pattern Recognition Receptors in Recognition of Bacteria and Viruses	NA	NA	NA	NA	NA	NA
Hepatic Fibrosis Hepatic Stellate Cell Activation	Hepatic Fibrosis Hepatic Stellate Cell Activation	NA	NA	NA	NA	NA	NA
Glioma Invasiveness Signaling	Glioma Invasiveness Signaling	NA	NA	NA	NA	NA	NA
RhoGDI Signaling	RhoGDI Signaling	NA	NA	NA	NA	NA	NA
Dendritic Cell Maturation	Dendritic Cell Maturation	NA	NA	NA	NA	NA	NA
Agranulocyte Adhesion and Diapedesis	Agranulocyte Adhesion and Diapedesis	NA	NA	NA	NA	NA	NA
Systemic Lupus Erythematosus In B Cell Signaling Pathway	Systemic Lupus Erythematosus In B Cell Signaling Pathway	NA	NA	NA	NA	NA	NA
HMGB1 Signaling	HMGB1 Signaling	NA	NA	NA	NA	NA	NA
IL 15 Production	IL 15 Production	NA	NA	NA	NA	NA	NA
Atherosclerosis Signaling	Atherosclerosis Signaling	NA	NA	NA	NA	NA	NA
Inhibition of MatriMetalloproteases	Inhibition of MatriMetalloproteases	NA	NA	NA	NA	NA	NA
Regulation of the Epithelial Mesenchymal Transition Pathway	Regulation of the Epithelial Mesenchymal Transition Pathway	NA	NA	NA	NA	NA	NA
Granulocyte Adhesion and Diapedesis	Granulocyte Adhesion and Diapedesis	NA	NA	NA	NA	NA	NA
Role of JAK1 and JAK3 in γc Cytokine Signaling	Role of JAK1 and JAK3 in γc Cytokine Signaling	NA	NA	NA	NA	NA	NA
Colorectal Cancer Metastasis Signaling	Colorectal Cancer Metastasis Signaling	NA	NA	NA	NA	NA	NA
Sertoli Cell Sertoli Cell Junction Signaling	NA	Sertoli Cell Sertoli Cell Junction Signaling	NA	NA	NA	NA	NA
Oncostatin M Signaling	NA	Oncostatin M Signaling	NA	NA	NA	NA	NA
Agrin Interactions at Neuromuscular Junction	NA	Agrin Interactions at Neuromuscular Junction	NA	NA	NA	NA	NA
Mechanisms of Viral Exit from Host Cells	NA	Mechanisms of Viral Exit from Host Cells	NA	NA	NA	NA	NA
Interferon Signaling	NA	NA	Interferon Signaling	NA	NA	NA	NA
Activation of IRF by Cytosolic Pattern Recognition Receptors	NA	NA	Activation of IRF by Cytosolic Pattern Recognition Receptors	NA	NA	NA	NA
Death Receptor Signaling	NA	NA	Death Receptor Signaling	NA	NA	NA	NA
Antigen Presentation Pathway	NA	NA	Antigen Presentation Pathway	NA	NA	NA	NA
Signaling by Rho Family GTPases	NA	NA	Signaling by Rho Family GTPases	NA	NA	NA	NA
Role of JAK family kinases in IL 6 type Cytokine Signaling	NA	NA	Role of JAK family kinases in IL 6 type Cytokine Signaling	NA	NA	NA	NA
GP6 Signaling Pathway	NA	NA	NA	GP6 Signaling Pathway	NA	NA	NA
Role of Osteoblasts Osteoclasts and Chondrocytes in Rheumatoid Arthritis	NA	NA	NA	Role of Osteoblasts Osteoclasts and Chondrocytes in Rheumatoid Arthritis	NA	NA	NA
Hepatic Fibrosis Signaling Pathway	NA	NA	NA	Hepatic Fibrosis Signaling Pathway	NA	NA	NA
HOTAIR Regulatory Pathway	NA	NA	NA	HOTAIR Regulatory Pathway	NA	NA	NA
Osteoarthritis Pathway	NA	NA	NA	Osteoarthritis Pathway	NA	NA	NA
Human Embryonic Stem Cell Pluripotency	NA	NA	NA	Human Embryonic Stem Cell Pluripotency	NA	NA	NA
Role of Macrophages Fibroblasts and Endothelial Cells in Rheumatoid Arthritis	NA	NA	NA	Role of Macrophages Fibroblasts and Endothelial Cells in Rheumatoid Arthritis	NA	NA	NA
Cardiac Hypertrophy Signaling Enhanced	NA	NA	NA	Cardiac Hypertrophy Signaling Enhanced	NA	NA	NA
Acute Phase Response Signaling	NA	NA	NA	Acute Phase Response Signaling	NA	NA	NA
Axonal Guidance Signaling	NA	NA	NA	Axonal Guidance Signaling	NA	NA	NA
Ovarian Cancer Signaling	NA	NA	NA	Ovarian Cancer Signaling	NA	NA	NA
Bladder Cancer Signaling	NA	NA	NA	Bladder Cancer Signaling	NA	NA	NA
HIF1α Signaling	NA	NA	NA	HIF1α Signaling	NA	NA	NA
Basal Cell Carcinoma Signaling	NA	NA	NA	Basal Cell Carcinoma Signaling	NA	NA	NA
Wnt β-catenin Signaling	NA	NA	NA	Wnt β-catenin Signaling	NA	NA	NA
Apelin Liver Signaling Pathway	NA	NA	NA	Apelin Liver Signaling Pathway	NA	NA	NA
IL 6 Signaling	NA	NA	NA	IL 6 Signaling	NA	NA	NA
Hepatic Cholestasis	NA	NA	NA	Hepatic Cholestasis	NA	NA	NA
LPS IL 1 Mediated Inhibition of RXR Function	NA	NA	NA	LPS IL 1 Mediated Inhibition of RXR Function	NA	NA	NA
NFκB Signaling	NA	NA	NA	NFκB Signaling	NA	NA	NA
Sperm Motility	NA	NA	NA	Sperm Motility	NA	NA	NA
Caveolar mediated Endocytosis Signaling	NA	NA	NA	Caveolar mediated Endocytosis Signaling	NA	NA	NA
Clathrin mediated Endocytosis Signaling	NA	NA	NA	Clathrin mediated Endocytosis Signaling	NA	NA	NA
STAT3 Pathway	NA	NA	NA	STAT3 Pathway	NA	NA	NA
Crosstalk between Dendritic Cells and Natural Killer Cells	NA	NA	NA	Crosstalk between Dendritic Cells and Natural Killer Cells	NA	NA	NA
Complement System	NA	NA	NA	Complement System	NA	NA	NA
Factors Promoting Cardiogenesis in Vertebrates	NA	NA	NA	Factors Promoting Cardiogenesis in Vertebrates	NA	NA	NA
Tight Junction Signaling	NA	NA	NA	NA	Tight Junction Signaling	NA	NA
Tec Kinase Signaling	NA	NA	NA	NA	Tec Kinase Signaling	NA	NA
Pyridoxal 5'-phosphate Salvage Pathway	NA	NA	NA	NA	Pyridoxal 5'-phosphate Salvage Pathway	NA	NA
Lymphotoxin β Receptor Signaling	NA	NA	NA	NA	Lymphotoxin β Receptor Signaling	NA	NA
Sumoylation Pathway	NA	NA	NA	NA	Sumoylation Pathway	NA	NA
Role of BRCA1 in DNA Damage Response	NA	NA	NA	NA	Role of BRCA1 in DNA Damage Response	NA	NA
Protein Ubiquitination Pathway	NA	NA	NA	NA	Protein Ubiquitination Pathway	NA	NA
Salvage Pathways of Pyrimidine Ribonucleotides	NA	NA	NA	NA	Salvage Pathways of Pyrimidine Ribonucleotides	NA	NA
5-aminoimidazole Ribonucleotide Biosynthesis I	NA	NA	NA	NA	5-aminoimidazole Ribonucleotide Biosynthesis I	NA	NA
Methionine Salvage II (Mammalian)	NA	NA	NA	NA	Methionine Salvage II (Mammalian)	NA	NA
Cell Cycle: G2/M DNA Damage Checkpoint Regulation	NA	NA	NA	NA	Cell Cycle: G2/M DNA Damage Checkpoint Regulation	NA	NA
Role of Tissue Factor in Cancer	NA	NA	NA	NA	Role of Tissue Factor in Cancer	NA	NA
Senescence Pathway	NA	NA	NA	NA	Senescence Pathway	NA	NA
GADD45 Signaling	NA	NA	NA	NA	GADD45 Signaling	NA	NA
Role of PKR in Interferon Induction and Antiviral Response	NA	NA	NA	NA	Role of PKR in Interferon Induction and Antiviral Response	NA	NA
ATM Signaling	NA	NA	NA	NA	ATM Signaling	NA	NA
Cell Cycle Control of Chromosomal Replication	NA	NA	NA	NA	Cell Cycle Control of Chromosomal Replication	NA	NA
Role of RIG1-like Receptors in Antiviral Innate Immunity	NA	NA	NA	NA	Role of RIG1-like Receptors in Antiviral Innate Immunity	NA	NA
Molecular Mechanisms of Cancer	NA	NA	NA	NA	Molecular Mechanisms of Cancer	NA	NA
IL-9 Signaling	NA	NA	NA	NA	IL-9 Signaling	NA	NA
Role of Oct4 in Mammalian Embryonic Stem Cell Pluripotency	NA	NA	NA	NA	Role of Oct4 in Mammalian Embryonic Stem Cell Pluripotency	NA	NA
Assembly of RNA Polymerase III Complex	NA	NA	NA	NA	Assembly of RNA Polymerase III Complex	NA	NA
Differential Regulation of Cytokine Production in Intestinal Epithelial Cells by IL-17A and IL-17F	NA	NA	NA	NA	Differential Regulation of Cytokine Production in Intestinal Epithelial Cells by IL-17A and IL-17F	NA	NA
Toll-like Receptor Signaling	NA	NA	NA	NA	Toll-like Receptor Signaling	NA	NA
Germ Cell-Sertoli Cell Junction Signaling	NA	NA	NA	NA	Germ Cell-Sertoli Cell Junction Signaling	NA	NA
Pancreatic Adenocarcinoma Signaling	NA	NA	NA	NA	Pancreatic Adenocarcinoma Signaling	NA	NA
Cell Cycle: G1/S Checkpoint Regulation	NA	NA	NA	NA	Cell Cycle: G1/S Checkpoint Regulation	NA	NA
Reelin Signaling in Neurons	NA	NA	NA	NA	Reelin Signaling in Neurons	NA	NA
UVA-Induced MAPK Signaling	NA	NA	NA	NA	UVA-Induced MAPK Signaling	NA	NA
Role of IL-17A in Arthritis	NA	NA	NA	NA	Role of IL-17A in Arthritis	NA	NA
NGF Signaling	NA	NA	NA	NA	NGF Signaling	NA	NA
RAN Signaling	NA	NA	NA	NA	RAN Signaling	NA	NA
Role of IL-17F in Allergic Inflammatory Airway Diseases	NA	NA	NA	NA	Role of IL-17F in Allergic Inflammatory Airway Diseases	NA	NA
2-amino-3-carboxymuconate Semialdehyde Degradation to Glutaryl-CoA	NA	NA	NA	NA	2-amino-3-carboxymuconate Semialdehyde Degradation to Glutaryl-CoA	NA	NA
Role of CHK Proteins in Cell Cycle Checkpoint Control	NA	NA	NA	NA	Role of CHK Proteins in Cell Cycle Checkpoint Control	NA	NA
TNFR2 Signaling	NA	NA	NA	NA	TNFR2 Signaling	NA	NA
Chronic Myeloid Leukemia Signaling	NA	NA	NA	NA	Chronic Myeloid Leukemia Signaling	NA	NA
PPAR Signaling	NA	NA	NA	NA	NA	PPAR Signaling	NA
PCP pathway	NA	NA	NA	NA	NA	PCP pathway	NA
Glioblastoma Multiforme Signaling	NA	NA	NA	NA	NA	Glioblastoma Multiforme Signaling	NA
Role of NANOG in Mammalian Embryonic Stem Cell Pluripotency	NA	NA	NA	NA	NA	Role of NANOG in Mammalian Embryonic Stem Cell Pluripotency	NA
LXR RXR Activation	NA	NA	NA	NA	NA	LXR/RXR Activation	NA
Role of Wnt/GSK-3β Signaling in the Pathogenesis of Influenza	NA	NA	NA	NA	NA	Role of Wnt/GSK-3β Signaling in the Pathogenesis of Influenza	NA
Virus Entry via Endocytic Pathways	NA	NA	NA	NA	NA	Virus Entry via Endocytic Pathways	NA
UDP N acetyl D glucosamine Biosynthesis II	NA	NA	NA	NA	NA	UDP-N-acetyl-D-glucosamine Biosynthesis II	NA
Paxillin Signaling	NA	NA	NA	NA	NA	Paxillin Signaling	NA
NFκB Activation by Viruses	NA	NA	NA	NA	NA	NFκB Activation by Viruses	NA
Gap Junction Signaling	NA	NA	NA	NA	NA	Gap Junction Signaling	NA
HER 2 Signaling in Breast Cancer	NA	NA	NA	NA	NA	HER-2 Signaling in Breast Cancer	NA
Endoplasmic Reticulum Stress Pathway	NA	NA	NA	NA	NA	Endoplasmic Reticulum Stress Pathway	NA
Ceramide Signaling	NA	NA	NA	NA	NA	Ceramide Signaling	NA
Airway Pathology in Chronic Obstructive Pulmonary Disease	NA	NA	NA	NA	NA	Airway Pathology in Chronic Obstructive Pulmonary Disease	NA
Superoxide Radicals Degradation	NA	NA	NA	NA	NA	Superoxide Radicals Degradation	NA
Neuregulin Signaling	NA	NA	NA	NA	NA	Neuregulin Signaling	NA
14 3 3 mediated Signaling	NA	NA	NA	NA	NA	14-3-3-mediated Signaling	NA
Nitric Oxide Signaling in the Cardiovascular System	NA	NA	NA	NA	NA	Nitric Oxide Signaling in the Cardiovascular System	NA
Calcium Transport I	NA	NA	NA	NA	NA	Calcium Transport I	NA
Macropinocytosis Signaling	NA	NA	NA	NA	NA	Macropinocytosis Signaling	NA
PD 1 PD L1 cancer immunotherapy pathway	NA	NA	NA	NA	NA	PD-1, PD-L1 cancer immunotherapy pathway	NA
γ-glutamyl Cycle	NA	NA	NA	NA	NA	γ-glutamyl Cycle	NA
L cysteine Degradation II	NA	NA	NA	NA	NA	L-cysteine Degradation II	NA
Role of Cytokines in Mediating Communication between Immune Cells	NA	NA	NA	NA	NA	Role of Cytokines in Mediating Communication between Immune Cells	NA
Hematopoiesis from Multipotent Stem Cells	NA	NA	NA	NA	NA	Hematopoiesis from Multipotent Stem Cells	NA
PI3K/AKT Signaling	NA	NA	NA	NA	NA	PI3K/AKT Signaling	NA
TR/RXR Activation	NA	NA	NA	NA	NA	TR/RXR Activation	NA
Leukotriene Biosynthesis	NA	NA	NA	NA	NA	Leukotriene Biosynthesis	NA
Acute Myeloid Leukemia Signaling	NA	NA	NA	NA	NA	Acute Myeloid Leukemia Signaling	NA
Epithelial Adherens Junction Signaling	NA	NA	NA	NA	NA	Epithelial Adherens Junction Signaling	NA
Production of Nitric Oxide and Reactive Oxygen Species in Macrophages	NA	NA	NA	NA	NA	Production of Nitric Oxide and Reactive Oxygen Species in Macrophages	NA
NRF2 mediated Oxidative Stress Response	NA	NA	NA	NA	NA	NRF2-mediated Oxidative Stress Response	NA
Phagosome Formation	NA	NA	NA	NA	NA	Phagosome Formation	NA
Cysteine Biosynthesis Homocysteine Degradation	NA	NA	NA	NA	NA	Cysteine Biosynthesis/Homocysteine Degradation	NA
Putrescine Biosynthesis III	NA	NA	NA	NA	NA	Putrescine Biosynthesis III	NA
FXR/RXR Activation	NA	NA	NA	NA	NA	FXR/RXR Activation	NA
PTEN Signaling	NA	NA	NA	NA	NA	PTEN Signaling	NA
FAK Signaling	NA	NA	NA	NA	NA	FAK Signaling	NA
P2Y Purigenic Receptor Signaling Pathway	NA	NA	NA	NA	NA	P2Y Purigenic Receptor Signaling Pathway	NA
Calcium induced T Lymphocyte Apoptosis	NA	NA	NA	NA	NA	Calcium-induced T Lymphocyte Apoptosis	NA
Adrenomedullin signaling pathway	NA	NA	NA	NA	NA	Adrenomedullin signaling pathway	NA
SPINK1 General Cancer Pathway	NA	NA	NA	NA	NA	SPINK1 General Cancer Pathway	NA
Intrinsic Prothrombin Activation Pathway	NA	NA	NA	NA	NA	Intrinsic Prothrombin Activation Pathway	NA
Neuroinflammation Signaling Pathway	NA	NA	NA	NA	NA	NA	Neuroinflammation Signaling Pathway
Type I Diabetes Mellitus Signaling	NA	NA	NA	NA	NA	NA	Type I Diabetes Mellitus Signaling
Inflammasome pathway	NA	NA	NA	NA	NA	NA	Inflammasome pathway
Chondroitin Sulfate Biosynthesis	NA	NA	NA	NA	NA	NA	Chondroitin Sulfate Biosynthesis
Dermatan Sulfate Biosynthesis	NA	NA	NA	NA	NA	NA	Dermatan Sulfate Biosynthesis
Retinoic acid Mediated Apoptosis Signaling	NA	NA	NA	NA	NA	NA	Retinoic acid Mediated Apoptosis Signaling
Th1 and Th2 Activation Pathway	NA	NA	NA	NA	NA	NA	Th1 and Th2 Activation Pathway
Chondroitin Sulfate Biosynthesis Late Stages	NA	NA	NA	NA	NA	NA	Chondroitin Sulfate Biosynthesis (Late Stages)
Th1 Pathway	NA	NA	NA	NA	NA	NA	Th1 Pathway
Dermatan Sulfate Biosynthesis Late Stages	NA	NA	NA	NA	NA	NA	Dermatan Sulfate Biosynthesis (Late Stages)
Role of JAK2 in Hormone like Cytokine Signaling	NA	NA	NA	NA	NA	NA	Role of JAK2 in Hormone-like Cytokine Signaling
Netrin Signaling	NA	NA	NA	NA	NA	NA	Netrin Signaling
Protein Citrullination	NA	NA	NA	NA	NA	NA	Protein Citrullination
IL 8 Signaling	NA	NA	NA	NA	NA	NA	IL-8 Signaling
Th17 Activation Pathway	NA	NA	NA	NA	NA	NA	Th17 Activation Pathway
Chondroitin and Dermatan Biosynthesis	NA	NA	NA	NA	NA	NA	Chondroitin and Dermatan Biosynthesis
TREM1 Signaling	NA	NA	NA	NA	NA	NA	TREM1 Signaling
cAMP mediated signaling	NA	NA	NA	NA	NA	NA	cAMP-mediated signaling
Vitamin C Transport	NA	NA	NA	NA	NA	NA	Vitamin-C Transport
ILK Signaling	NA	NA	NA	NA	NA	NA	ILK Signaling
iNOS Signaling	NA	NA	NA	NA	NA	NA	iNOS Signaling
FAT10 Cancer Signaling Pathway	NA	NA	NA	NA	NA	NA	FAT10 Cancer Signaling Pathway
T Cell Exhaustion Signaling Pathway	NA	NA	NA	NA	NA	NA	T Cell Exhaustion Signaling Pathway
IL 17 Signaling	NA	NA	NA	NA	NA	NA	IL-17 Signaling
JAK Stat Signaling	NA	NA	NA	NA	NA	NA	JAK/Stat Signaling
p38 MAPK Signaling	NA	NA	NA	NA	NA	NA	p38 MAPK Signaling
PEDF Signaling	NA	NA	NA	NA	NA	NA	PEDF Signaling
Cardiac β-adrenergic Signaling	NA	NA	NA	NA	NA	NA	Cardiac β-adrenergic Signaling
VEGF Family Ligand Receptor Interactions	NA	NA	NA	NA	NA	NA	VEGF Family Ligand-Receptor Interactions
Salvage Pathways of Pyrimidine Deoxyribonucleotides	NA	NA	NA	NA	NA	NA	Salvage Pathways of Pyrimidine Deoxyribonucleotides
Cytotoxic T Lymphocyte mediated Apoptosis of Target Cells	NA	NA	NA	NA	NA	NA	Cytotoxic T Lymphocyte-mediated Apoptosis of Target Cells
Endocannabinoid Cancer Inhibition Pathway	NA	NA	NA	NA	NA	NA	Endocannabinoid Cancer Inhibition Pathway
Coagulation System	NA	NA	NA	NA	NA	NA	Coagulation System
Regulation of IL 2 Expression in Activated and Anergic T Lymphocytes	NA	NA	NA	NA	NA	NA	Regulation of IL-2 Expression in Activated and Anergic T Lymphocytes
Heparan Sulfate Biosynthesis Late Stages	NA	NA	NA	NA	NA	NA	Heparan Sulfate Biosynthesis (Late Stages)
Notch Signaling	NA	NA	NA	NA	NA	NA	Notch Signaling
Altered T Cell and B Cell Signaling in Rheumatoid Arthritis	NA	NA	NA	NA	NA	NA	Altered T Cell and B Cell Signaling in Rheumatoid Arthritis
White Adipose Tissue Browning Pathway	NA	NA	NA	NA	NA	NA	White Adipose Tissue Browning Pathway
Phospholipase C Signaling	NA	NA	NA	NA	NA	NA	Phospholipase C Signaling
IL 1 Signaling	NA	NA	NA	NA	NA	NA	IL-1 Signaling
Role of NFAT in Cardiac Hypertrophy	NA	NA	NA	NA	NA	NA	Role of NFAT in Cardiac Hypertrophy
Apelin Cardiac Fibroblast Signaling Pathway	NA	NA	NA	NA	NA	NA	Apelin Cardiac Fibroblast Signaling Pathway

## Sheet: Pathways_HCC827 (NFs)
¬© 2000-2020 QIAGEN. All rights reserved.
Ingenuity Canonical Pathways	-log(p-value)	Ratio	z-score	Molecules
Interferon Signaling	9.56	0.389	3.051	IFI35,IFI6,IFIT1,IFIT3,IFITM1,IFITM3,IRF9,ISG15,MX1,OAS1,PSMB8,SOCS1,STAT1,TAP1
Tight Junction Signaling	3.99	0.119	NaN	ACTA2,ACTG2,CGN,CLDN14,CLDN3,CLDN7,CPSF2,EPB41,MPP5,MYH10,MYH14,NFKB2,OCLN,PATJ,SMURF1,SPTAN1,TGFB2,TIAM1,TJP1,TJP3
Tec Kinase Signaling	3.22	0.11	-1.604	ACTA2,ACTG2,FNBP1,FRK,GNAL,GNG3,ITGA5,JAK3,NFKB2,PAK2,PIK3CA,PRKCE,RHOBTB2,RND1,STAT1,STAT5B,TEC,VAV3
Pyridoxal 5'-phosphate Salvage Pathway	3.12	0.154	-1.667	DAPK1,EIF2AK2,GRK5,LIMK1,MAP2K3,MAP3K9,PAK2,PIM1,POMK,PRKCE
Leukocyte Extravasation Signaling	3.07	0.102	-0.243	ACTA2,ACTG2,ARHGAP5,ARHGAP8/PRR5-ARHGAP8,CLDN14,CLDN3,CLDN7,ITGA5,ITGB3,MMP13,MMP2,MMP24,PIK3CA,PRKCE,PTPN11,RASSF5,TEC,TIMP3,TIMP4,VAV3
Role of Pattern Recognition Receptors in Recognition of Bacteria and Viruses	2.67	0.104	0.707	CCL5,DDX58,EIF2AK2,IFIH1,IL18,IL1A,IL5,IRF7,LTB,NFKB2,OAS1,OAS2,OAS3,PIK3CA,PRKCE,TGFB2
Activation of IRF by Cytosolic Pattern Recognition Receptors	2.63	0.143	1	DDX58,DHX58,IFIH1,IRF7,IRF9,ISG15,NFKB2,PPIB,STAT1
Sertoli Cell-Sertoli Cell Junction Signaling	2.62	0.0973	NaN	ACTA2,ACTG2,AXIN1,CGN,CLDN14,CLDN3,CLDN7,DLG1,EPB41,ITGA5,MAP2K3,MAP3K14,MAP3K9,OCLN,SPTAN1,SPTBN1,TJP1,TJP3
Lymphotoxin-β Receptor Signaling	2.55	0.151	-2.236	EP300,LTB,MAP3K14,NFKB2,PIK3CA,RELB,TRAF1,TRAF4
Sumoylation Pathway	2.54	0.117	0	EP300,FNBP1,ISG20,NFKB2,RCC1,RHOBTB2,RND1,SENP1,SENP3,SENP5,SP100,TP53
Death Receptor Signaling	2.5	0.121	0.905	ACTA2,ACTG2,BIRC3,LIMK1,MAP3K14,NFKB2,PARP10,PARP12,PARP14,PARP9,SPTAN1
Oncostatin M Signaling	2.48	0.163	0.816	EPAS1,JAK3,MMP13,MT2A,STAT1,STAT5B,TIMP3
Role of BRCA1 in DNA Damage Response	2.42	0.125	-0.707	ARID2,ATR,BRCA1,E2F2,FANCB,GADD45A,MDC1,MSH6,STAT1,TP53
Protein Ubiquitination Pathway	2.37	0.0842	NaN	ANAPC1,ANAPC2,B2M,BIRC3,BRCA1,DNAJC2,DNAJC6,HLA-F,HSPB6,NEDD4,NEDD4L,PSMB8,PSMB9,SMURF1,TAP1,UBE2L6,USP18,USP2,USP22,USP36,USP40,USP54,USP7
Salvage Pathways of Pyrimidine Ribonucleotides	2.29	0.113	-1.265	CMPK2,DAPK1,EIF2AK2,GRK5,LIMK1,MAP2K3,MAP3K9,PAK2,PIM1,POMK,PRKCE
Hepatic Fibrosis / Hepatic Stellate Cell Activation	2.23	0.0914	NaN	ACTA2,CCL5,COL1A1,COL1A2,COL3A1,COL4A5,COL9A2,IL1A,MET,MMP13,MMP2,MYH10,MYH14,NFKB2,PGF,STAT1,TGFB2
5-aminoimidazole Ribonucleotide Biosynthesis I	2.21	0.667	NaN	PFAS,PPAT
Methionine Salvage II (Mammalian)	2.21	0.667	NaN	BHMT2,MTR
Glioma Invasiveness Signaling	2.16	0.122	-0.378	FNBP1,ITGB3,MMP2,PIK3CA,PLAUR,RHOBTB2,RND1,TIMP3,TIMP4
Cell Cycle: G2/M DNA Damage Checkpoint Regulation	2.16	0.143	-1.134	ATR,BRCA1,EP300,GADD45A,HIPK2,TP53,TRIP12
Role of Tissue Factor in Cancer	2.1	0.103	NaN	F3,FRK,HBEGF,ITGB3,LIMK1,MMP13,PIK3CA,PLAUR,PTPN11,RPS6KA3,STAT5B,TP53
Antigen Presentation Pathway	2.07	0.154	NaN	B2M,HLA-F,MR1,PSMB8,PSMB9,TAP1
Senescence Pathway	2.04	0.08	-2.683	ANAPC1,ANAPC2,ATF3,ATR,CAPN7,CDC25A,E2F2,ELF3,ELF4,EP300,EP400,GADD45A,HIPK2,IL1A,MAP2K3,NFKB2,PIK3CA,RASSF5,SAA2-SAA4,TGFB2,TMEM173,TP53
RhoGDI Signaling	2.02	0.0889	1.155	ACTA2,ACTG2,ARHGAP5,ARHGAP8/PRR5-ARHGAP8,ARHGEF5,ARHGEF7,CDH8,EP300,FNBP1,GNAL,GNG3,ITGA5,LIMK1,PAK2,RHOBTB2,RND1
GADD45 Signaling	2	0.211	NaN	ATR,BRCA1,GADD45A,TP53
Role of PKR in Interferon Induction and Antiviral Response	1.96	0.146	NaN	EIF2AK2,FCGR1A,MAP2K3,NFKB2,STAT1,TP53
Dendritic Cell Maturation	1.95	0.0874	-1.291	B2M,COL1A1,COL1A2,COL3A1,CREB5,FCGR1A,HLA-F,IL18,IL1A,LTB,MAP3K14,NFKB2,PIK3CA,PLCD4,RELB,STAT1
ATM Signaling	1.84	0.103	-1	ATR,BRCA1,CDC25A,CREB5,GADD45A,MDC1,PPP1CC,RNF168,TP53,USP7
Cell Cycle Control of Chromosomal Replication	1.84	0.125	-2.646	CDC6,CDK11A,MCM2,MCM4,ORC1,POLA1,POLE
Role of RIG1-like Receptors in Antiviral Innate Immunity	1.82	0.136	0.447	DDX58,DHX58,EP300,IFIH1,IRF7,NFKB2
Molecular Mechanisms of Cancer	1.82	0.0716	NaN	ARHGEF5,ARHGEF7,ATR,AXIN1,BIRC3,BRCA1,CDC25A,CDK11A,E2F2,EP300,FNBP1,GNAL,HIPK2,ITGA5,JAK3,MAP2K3,NFKB2,PAK2,PIK3CA,PRKCE,PTPN11,RHOBTB2,RND1,SIN3A,STK36,TGFB2,TP53,WNT10A
Agranulocyte Adhesion and Diapedesis	1.77	0.0833	NaN	ACTA2,ACTG2,CCL28,CCL5,CLDN14,CLDN3,CLDN7,CXCL5,IL18,IL1A,ITGA5,MMP13,MMP2,MMP24,MYH10,MYH14
IL-9 Signaling	1.77	0.152	-1.342	JAK3,NFKB2,PIK3CA,STAT1,STAT5B
Systemic Lupus Erythematosus In B Cell Signaling Pathway	1.76	0.0764	-0.218	IFIH1,IFIT3,IL18,IL1A,IL5,IRF7,IRF9,ISG15,ISG20,LTB,MAP3K14,NFKB2,PIK3CA,PLAAT4,PRKCE,PTPN11,STAT1,TGFB2,TMEM173,TRAF1,TRAF4
Role of Oct4 in Mammalian Embryonic Stem Cell Pluripotency	1.73	0.13	NaN	BRCA1,FBXO15,PHC3,TASOR,TDRD7,TP53
Signaling by Rho Family GTPases	1.72	0.0779	-2.324	ACTA2,ACTG2,ARHGEF5,ARHGEF7,CDH8,CIT,FNBP1,GNAL,GNG3,ITGA5,LIMK1,MAP3K21,MAP3K9,NEDD4,NFKB2,PAK2,PIK3CA,RHOBTB2,RND1
Assembly of RNA Polymerase III Complex	1.7	0.231	NaN	BRF1,GTF3C3,GTF3C4
Differential Regulation of Cytokine Production in Intestinal Epithelial Cells by IL-17A and IL-17F	1.7	0.174	NaN	CCL5,CSF3,DEFB103A/DEFB103B,IL1A
HMGB1 Signaling	1.67	0.0848	-3.317	FNBP1,IL18,IL1A,IL5,KAT2A,KAT6A,KAT6B,LTB,MAP2K3,NFKB2,PIK3CA,RHOBTB2,RND1,TGFB2
Toll-like Receptor Signaling	1.62	0.105	-0.816	EIF2AK2,IL18,IL1A,MAP2K3,MAP3K14,NFKB2,TRAF1,TRAF4
IL-15 Production	1.61	0.0909	NaN	ABL2,FRK,JAK3,LMTK2,MAP2K3,MERTK,MET,NFKB2,STAT1,STYK1,TEC
Role of JAK family kinases in IL-6-type Cytokine Signaling	1.58	0.16	NaN	PTPN11,SOCS1,STAT1,STAT5B
Germ Cell-Sertoli Cell Junction Signaling	1.56	0.0819	NaN	ACTA2,ACTG2,AXIN1,FNBP1,LIMK1,MAP2K3,MAP3K14,MAP3K9,PAK2,PIK3CA,RHOBTB2,RND1,TGFB2,TJP1
Agrin Interactions at Neuromuscular Junction	1.53	0.101	0.378	ACTA2,ACTG2,ARHGEF7,ITGA5,ITGB3,NRG1,PAK2,UTRN
Pancreatic Adenocarcinoma Signaling	1.53	0.0917	-1.134	E2F2,HBEGF,JAK3,NFKB2,PGF,PIK3CA,SIN3A,STAT1,TGFB2,TP53
Atherosclerosis Signaling	1.49	0.0873	NaN	ALOX12B,COL1A1,COL1A2,COL3A1,F3,IL18,IL1A,MMP13,NFKB2,PLAAT4,PLAAT5
Inhibition of Matrix Metalloproteases	1.48	0.128	0.447	MMP13,MMP2,MMP24,TIMP3,TIMP4
Regulation of the Epithelial-Mesenchymal Transition Pathway	1.47	0.0781	NaN	AXIN1,CLDN3,ESRP2,FRS2,JAG2,JAK3,MAP2K3,MET,MMP2,NFKB2,PIK3CA,PTPN11,SMURF1,TGFB2,WNT10A
Cell Cycle: G1/S Checkpoint Regulation	1.46	0.104	0.447	ATR,CDC25A,E2F2,NRG1,SIN3A,TGFB2,TP53
Reelin Signaling in Neurons	1.43	0.0853	-2.111	ARHGEF5,FRK,GRIN2D,ITGA5,ITGB3,LIMK1,LRP8,MAP2K3,MAP3K9,MAPK8IP2,PIK3CA
UVA-Induced MAPK Signaling	1.42	0.0918	-1	PARP10,PARP12,PARP14,PARP9,PIK3CA,PLCD4,RPS6KA3,STAT1,TP53
Role of IL-17A in Arthritis	1.42	0.111	NaN	CCL5,CXCL5,MAP2K3,MMP13,NFKB2,PIK3CA
NGF Signaling	1.41	0.0877	-3	CREB5,MAP3K14,MAP3K9,NFKB2,PIK3CA,PTPN11,RPS6KA3,TP53,TRAF4,TRIO
Granulocyte Adhesion and Diapedesis	1.41	0.0782	NaN	CCL28,CCL5,CLDN14,CLDN3,CLDN7,CSF3,CXCL5,IL18,IL1A,ITGA5,ITGB3,MMP13,MMP2,MMP24
Mechanisms of Viral Exit from Host Cells	1.4	0.122	NaN	ACTA2,ACTG2,NEDD4,PRKCE,XPO1
Role of JAK1 and JAK3 in Œ≥c Cytokine Signaling	1.4	0.101	NaN	IL2RB,JAK3,PIK3CA,PTPN11,SOCS1,STAT1,STAT5B
RAN Signaling	1.38	0.176	NaN	KPNB1,RCC1,XPO1
Role of IL-17F in Allergic Inflammatory Airway Diseases	1.36	0.119	-1.342	CREB5,CXCL5,MMP13,NFKB2,RPS6KA3
2-amino-3-carboxymuconate Semialdehyde Degradation to Glutaryl-CoA	1.33	1	NaN	ACMSD
Colorectal Cancer Metastasis Signaling	1.33	0.0711	0	AXIN1,FNBP1,GNG3,GRK3,JAK3,MMP13,MMP2,MMP24,MSH6,NFKB2,PGF,PIK3CA,RHOBTB2,RND1,STAT1,TGFB2,TP53,WNT10A
Role of CHK Proteins in Cell Cycle Checkpoint Control	1.32	0.105	-1	ATR,BRCA1,CDC25A,E2F2,MDC1,TP53
TNFR2 Signaling	1.32	0.133	-1	BIRC3,MAP3K14,NFKB2,TRAF1
Chronic Myeloid Leukemia Signaling	1.31	0.0874	NaN	E2F2,MECOM,NFKB2,PIK3CA,PTPN11,SIN3A,STAT5B,TGFB2,TP53

## Sheet: Pathways_HCC827 (TAFs)
¬© 2000-2020 QIAGEN. All rights reserved.
Ingenuity Canonical Pathways	-log(p-value)	Ratio	z-score	Molecules
Hepatic Fibrosis / Hepatic Stellate Cell Activation	15.2	0.145	NaN	ACTA2,COL12A1,COL13A1,COL16A1,COL1A1,COL1A2,COL3A1,COL4A1,COL4A2,COL5A1,COL5A2,COL6A1,COL6A2,COL6A3,COL9A2,ECE1,EDNRA,FGFR1,FN1,IGFBP5,IL1R1,MMP1,MMP2,PDGFRB,SERPINE1,TNFRSF11B,TNFRSF1A
GP6 Signaling Pathway	12.6	0.168	3.9	COL12A1,COL13A1,COL16A1,COL1A1,COL1A2,COL3A1,COL4A1,COL4A2,COL5A1,COL5A2,COL6A1,COL6A2,COL6A3,COL9A2,GP6,GRAP2,ITGA2B,ITGB3,PIK3C2B,PRKD1
Role of Osteoblasts, Osteoclasts and Chondrocytes in Rheumatoid Arthritis	9.24	0.1	NaN	ADAMTS4,BMP1,COL1A1,CTSK,DKK3,FZD4,IL18,IL1R1,IL37,ITGA5,ITGB3,MMP1,MMP14,MMP3,PIK3C2B,TCF4,TNFRSF11B,TNFRSF1A,WNT4,WNT5A,WNT5B,WNT7A
Hepatic Fibrosis Signaling Pathway	8.82	0.0761	3.272	ACTA2,CDKN1B,COL1A1,COL1A2,COL3A1,EDNRA,FGFR1,FOXO4,FZD4,IL17RA,IL18,IL1R1,IL37,ITGA5,ITGB3,MMP1,MRAS,PDGFRB,PIK3C2B,PRKD1,SERPINE1,TCF4,TNFRSF11B,TNFRSF1A,WNT4,WNT5A,WNT5B,WNT7A
Leukocyte Extravasation Signaling	7.8	0.0964	3	ACTA2,ACTG2,CD44,CLDN3,ITGA5,ITGB3,JAM2,MMP1,MMP10,MMP11,MMP14,MMP2,MMP3,PECAM1,PIK3C2B,PRKD1,SELPLG,THY1,TIMP3
HOTAIR Regulatory Pathway	7.71	0.107	3.153	CD44,COL1A1,COL1A2,JAM2,MEX3B,MMP1,MMP10,MMP11,MMP14,MMP2,MMP3,PIK3C2B,TCF4,WNT4,WNT5A,WNT5B,WNT7A
Granulocyte Adhesion and Diapedesis	7.7	0.101	NaN	CLDN3,CSF3,IL18,IL1R1,IL37,ITGA5,ITGB3,MMP1,MMP10,MMP11,MMP14,MMP2,MMP3,PECAM1,SELPLG,THY1,TNFRSF11B,TNFRSF1A
Osteoarthritis Pathway	6.61	0.0853	2.324	ADAMTS4,ALPG,DCN,FGF8,FGFR1,FN1,FZD4,GREM1,HTRA1,IL1R1,ITGA5,MMP1,MMP10,MMP3,SPHK1,TCF4,TIMP3,TNFRSF1A
Agranulocyte Adhesion and Diapedesis	6.51	0.0885	NaN	ACTA2,ACTG2,CLDN3,FN1,IL18,IL1R1,IL37,ITGA5,MMP1,MMP10,MMP11,MMP14,MMP2,MMP3,PECAM1,SELPLG,TNFRSF1A
Human Embryonic Stem Cell Pluripotency	6.29	0.104	NaN	BMP1,FGFR1,FZD4,INHBA,MRAS,PDGFRB,PIK3C2B,S1PR4,SPHK1,TCF4,WNT4,WNT5A,WNT5B,WNT7A
Role of Macrophages, Fibroblasts and Endothelial Cells in Rheumatoid Arthritis	5.89	0.0673	NaN	ADAMTS4,DKK3,FN1,FZD4,IL15,IL17RA,IL18,IL1R1,IL37,MMP1,MMP3,MRAS,PIK3C2B,PRKD1,TCF4,TNFRSF11B,TNFRSF1A,WNT4,WNT5A,WNT5B,WNT7A
Cardiac Hypertrophy Signaling (Enhanced)	5.74	0.0554	3.266	ATP2A1,ATP2A3,CD70,EDNRA,FGF5,FGF8,FGFR1,FZD4,IL13RA2,IL15,IL17RA,IL18,IL1R1,IL37,IL7R,ITGA5,ITPR2,MRAS,NPPB,PIK3C2B,PRKD1,TNFRSF11B,TNFRSF1A,WNT4,WNT5A,WNT5B,WNT7A
Regulation of the Epithelial-Mesenchymal Transition Pathway	5.14	0.0781	NaN	CDH2,CLDN3,FGF5,FGF8,FGFR1,FZD4,MMP2,MRAS,PDGFRB,PIK3C2B,TCF4,WNT4,WNT5A,WNT5B,WNT7A
Inhibition of Matrix Metalloproteases	4.99	0.179	-1.89	MMP1,MMP10,MMP11,MMP14,MMP2,MMP3,TIMP3
Acute Phase Response Signaling	4.84	0.0782	0.905	C1S,CP,CRABP2,FN1,IL18,IL1R1,IL37,MRAS,OSMR,SERPINE1,SERPINF1,TCF4,TNFRSF11B,TNFRSF1A
Axonal Guidance Signaling	4.82	0.0515	NaN	ADAM19,ADAMTS4,BMP1,EPHB1,FZD4,ITGA5,MME,MMP1,MMP10,MMP11,MMP14,MMP2,MMP3,MRAS,NRP1,PIK3C2B,PRKD1,RGS3,ROBO1,SEMA5A,TUBA1A,WNT4,WNT5A,WNT5B,WNT7A
Ovarian Cancer Signaling	4.66	0.0863	1.342	CD44,EDNRA,FZD4,GJA1,MMP2,MRAS,PIK3C2B,TCF4,WNT4,WNT5A,WNT5B,WNT7A
Atherosclerosis Signaling	4.36	0.0873	NaN	ALOX5,CLU,COL1A1,COL1A2,COL3A1,IL18,IL37,MMP1,MMP3,PCYOX1,SELPLG
Bladder Cancer Signaling	3.87	0.0928	NaN	FGF5,FGF8,MMP1,MMP10,MMP11,MMP14,MMP2,MMP3,MRAS
Colorectal Cancer Metastasis Signaling	3.76	0.0593	3.357	FZD4,MMP1,MMP10,MMP11,MMP14,MMP2,MMP3,MRAS,PIK3C2B,TCF4,TNFRSF1A,WNT4,WNT5A,WNT5B,WNT7A
PPAR Signaling	3.64	0.0865	-1	HSP90B1,IL18,IL1R1,IL37,MRAS,PDGFRB,PPARA,TNFRSF11B,TNFRSF1A
HIF1Œ± Signaling	3.37	0.0796	NaN	MMP1,MMP10,MMP11,MMP14,MMP2,MMP3,MRAS,PIK3C2B,SLC2A3
Basal Cell Carcinoma Signaling	3.25	0.0972	1.633	BMP1,FZD4,TCF4,WNT4,WNT5A,WNT5B,WNT7A
Wnt/Œ≤-catenin Signaling	3.15	0.0636	1.667	CD44,CDH2,DKK3,FZD4,GJA1,TCF4,TLE3,WNT4,WNT5A,WNT5B,WNT7A
PCP pathway	2.92	0.1	1.633	FZD4,JUNB,WNT4,WNT5A,WNT5B,WNT7A
Oncostatin M Signaling	2.81	0.116	2.236	MMP1,MMP3,MRAS,OSMR,TIMP3
Apelin Liver Signaling Pathway	2.79	0.154	2	COL1A1,COL1A2,COL3A1,PDGFRB
HMGB1 Signaling	2.76	0.0606	0.816	CD70,IL15,IL18,IL1R1,IL37,MRAS,PIK3C2B,SERPINE1,TNFRSF11B,TNFRSF1A
Glioblastoma Multiforme Signaling	2.76	0.0606	1.897	CDKN1B,FZD4,ITPR2,MRAS,PDGFRB,PIK3C2B,WNT4,WNT5A,WNT5B,WNT7A
Role of NANOG in Mammalian Embryonic Stem Cell Pluripotency	2.59	0.0672	NaN	BMP1,FZD4,MRAS,PIK3C2B,WNT4,WNT5A,WNT5B,WNT7A
LXR/RXR Activation	2.54	0.0661	0.707	CLU,IL18,IL1R1,IL37,PCYOX1,SERPINF1,TNFRSF11B,TNFRSF1A
Glioma Invasiveness Signaling	2.46	0.0811	1.633	CD44,ITGB3,MMP2,MRAS,PIK3C2B,TIMP3
IL-6 Signaling	2.45	0.064	1.414	COL1A1,IL18,IL1R1,IL37,MRAS,PIK3C2B,TNFRSF11B,TNFRSF1A
Hepatic Cholestasis	2.42	0.0543	NaN	ATP8B1,CD70,IL15,IL18,IL1R1,IL37,PPARA,PRKD1,TNFRSF11B,TNFRSF1A
Role of Wnt/GSK-3 Signaling in the Pathogenesis of Influenza	2.34	0.0769	1.342	FZD4,TCF4,WNT4,WNT5A,WNT5B,WNT7A
LPS/IL-1 Mediated Inhibition of RXR Function	2.27	0.0491	1	ALDH1L2,FMO3,HS3ST3A1,HS3ST3B1,IL18,IL1R1,IL37,PPARA,SOD3,TNFRSF11B,TNFRSF1A
Virus Entry via Endocytic Pathways	2.26	0.0654	NaN	ACTA2,ACTG2,ITGA5,ITGB3,MRAS,PIK3C2B,PRKD1
UDP-N-acetyl-D-glucosamine Biosynthesis II	2.25	0.333	NaN	FMO3,GFPT2
Paxillin Signaling	2.24	0.0648	2.236	ACTA2,ACTG2,ITGA2B,ITGA5,ITGB3,MRAS,PIK3C2B
NF-kB Activation by Viruses	2.24	0.0732	2.449	CR2,ITGA5,ITGB3,MRAS,PIK3C2B,PRKD1
Gap Junction Signaling	2.2	0.0505	NaN	ACTA2,ACTG2,CTH,DRD1,GJA1,ITPR2,MRAS,PIK3C2B,PRKD1,TUBA1A
HER-2 Signaling in Breast Cancer	2.19	0.0714	NaN	CDKN1B,ITGB3,MMP2,MRAS,PIK3C2B,PRKD1
Endoplasmic Reticulum Stress Pathway	2.1	0.143	NaN	CALR,HSP90B1,HSPA5
Ceramide Signaling	2.09	0.0682	1.633	MRAS,PIK3C2B,S1PR4,SPHK1,TNFRSF11B,TNFRSF1A
Systemic Lupus Erythematosus In B Cell Signaling Pathway	2.04	0.0436	1.155	CD70,FOXO4,IFIT2,IFIT3,IL15,IL18,IL37,MRAS,PDCD1,PIK3C2B,PRKD1,TMEM173
NF-kB Signaling	2.01	0.0503	1.667	FGFR1,IL18,IL1R1,IL37,MRAS,PDGFRB,PIK3C2B,TNFRSF11B,TNFRSF1A
Airway Pathology in Chronic Obstructive Pulmonary Disease	1.99	0.25	NaN	MMP1,MMP2
Superoxide Radicals Degradation	1.99	0.25	NaN	CYGB,SOD3
Dendritic Cell Maturation	1.95	0.0492	1.667	COL1A1,COL1A2,COL3A1,IL15,IL18,IL37,PIK3C2B,TNFRSF11B,TNFRSF1A
Neuregulin Signaling	1.91	0.0625	1	CDKN1B,DCN,HSP90B1,ITGA5,MRAS,PRKD1
14-3-3-mediated Signaling	1.87	0.0551	1.342	CDKN1B,GFAP,MRAS,PIK3C2B,PRKD1,TNFRSF1A,TUBA1A
Sperm Motility	1.85	0.0448	1.342	CSF2RA,EPHB1,FGFR1,ITPR2,KIT,MRAS,NPPB,NPPC,PDGFRB,PRKD1
Nitric Oxide Signaling in the Cardiovascular System	1.85	0.0606	1.633	ATP2A1,ATP2A3,HSP90B1,ITPR2,PIK3C2B,PRKD1
Caveolar-mediated Endocytosis Signaling	1.82	0.0685	NaN	ACTA2,ACTG2,ITGA2B,ITGA5,ITGB3
Clathrin-mediated Endocytosis Signaling	1.82	0.0466	NaN	ACTA2,ACTG2,CLU,FGF5,FGF8,ITGA5,ITGB3,PCYOX1,PIK3C2B
Calcium Transport I	1.8	0.2	NaN	ATP2A1,ATP2A3
Macropinocytosis Signaling	1.75	0.0658	2	ITGA5,ITGB3,MRAS,PIK3C2B,PRKD1
STAT3 Pathway	1.74	0.0519	NaN	FGFR1,IL13RA2,IL17RA,IL1R1,IL7R,MRAS,PDGFRB
PD-1, PD-L1 cancer immunotherapy pathway	1.72	0.0566	0.447	CDKN1B,PDCD1,PDCD1LG2,PIK3C2B,TNFRSF11B,TNFRSF1A
γ-glutamyl Cycle	1.72	0.182	NaN	ANPEP,GGT7
L-cysteine Degradation II	1.7	1	NaN	CTH
Agrin Interactions at Neuromuscular Junction	1.69	0.0633	2.236	ACTA2,ACTG2,ITGA5,ITGB3,MRAS
Role of Cytokines in Mediating Communication between Immune Cells	1.65	0.0741	NaN	CSF3,IL15,IL18,IL37
Hematopoiesis from Multipotent Stem Cells	1.64	0.167	NaN	CSF3,IL15
PI3K/AKT Signaling	1.64	0.046	2	CDKN1B,HSP90B1,IL13RA2,IL17RA,IL1R1,IL7R,ITGA5,MRAS
TR/RXR Activation	1.59	0.0595	NaN	ATP2A1,BCL3,COL6A3,PIK3C2B,SLC16A2
Leukotriene Biosynthesis	1.58	0.154	NaN	ALOX5,GGT7
RhoGDI Signaling	1.56	0.0444	-2.828	ACTA2,ACTG2,CD44,CDH11,CDH13,CDH2,ITGA5,MRAS
Sertoli Cell-Sertoli Cell Junction Signaling	1.5	0.0432	NaN	ACTA2,ACTG2,CLDN3,ITGA5,JAM2,MRAS,TNFRSF1A,TUBA1A
Acute Myeloid Leukemia Signaling	1.49	0.0562	2.236	CSF2RA,KIT,MRAS,PIK3C2B,TCF4
Crosstalk between Dendritic Cells and Natural Killer Cells	1.49	0.0562	NaN	ACTA2,ACTG2,IL15,IL18,MICA
Epithelial Adherens Junction Signaling	1.49	0.0461	NaN	ACTA2,ACTG2,CDH2,FGFR1,MRAS,TCF4,TUBA1A
IL-15 Production	1.47	0.0496	NaN	CSF2RA,EPHB1,FGFR1,IL15,KIT,PDGFRB
Role of Pattern Recognition Receptors in Recognition of Bacteria and Viruses	1.46	0.0455	NaN	CD70,IL15,IL18,IL37,PIK3C2B,PRKD1,RNASEL
Production of Nitric Oxide and Reactive Oxygen Species in Macrophages	1.46	0.0426	2.828	CLU,PCYOX1,PIK3C2B,PPARA,PPP1R14C,PRKD1,TNFRSF11B,TNFRSF1A
NRF2-mediated Oxidative Stress Response	1.45	0.0423	1	ACTA2,ACTG2,GPX2,JUNB,MRAS,PIK3C2B,PRKD1,SOD3
Complement System	1.44	0.0811	NaN	C1S,CFH,CR2
Factors Promoting Cardiogenesis in Vertebrates	1.42	0.0538	NaN	BMP1,FZD4,NPPB,PRKD1,TCF4
Phagosome Formation	1.41	0.048	NaN	CR2,FN1,ITGA5,PIK3C2B,PRKD1,SCARA3
Cysteine Biosynthesis/Homocysteine Degradation	1.41	0.5	NaN	CTH
Putrescine Biosynthesis III	1.41	0.5	NaN	AZIN2
FXR/RXR Activation	1.4	0.0476	NaN	CLU,IL18,IL37,PCYOX1,PPARA,SERPINF1
PTEN Signaling	1.4	0.0476	-1.633	CDKN1B,FGFR1,FOXO4,ITGA5,MRAS,PDGFRB
FAK Signaling	1.39	0.0526	NaN	ACTA2,ACTG2,ITGA5,MRAS,PIK3C2B
P2Y Purigenic Receptor Signaling Pathway	1.39	0.0472	2	ITGA2B,ITGB3,MRAS,P2RY6,PIK3C2B,PRKD1
Calcium-induced T Lymphocyte Apoptosis	1.38	0.0606	1	ATP2A1,ATP2A3,ITPR2,PRKD1
Adrenomedullin signaling pathway	1.36	0.0406	0.378	CFH,CTH,IL18,IL37,ITPR2,MMP2,MRAS,PIK3C2B
Mechanisms of Viral Exit from Host Cells	1.32	0.0732	NaN	ACTA2,ACTG2,PRKD1
Role of JAK1 and JAK3 in Œ≥c Cytokine Signaling	1.32	0.058	NaN	IL15,IL7R,MRAS,PIK3C2B
SPINK1 General Cancer Pathway	1.32	0.058	0	MRAS,MT1E,MT1M,PIK3C2B
Intrinsic Prothrombin Activation Pathway	1.3	0.0714	NaN	COL1A1,COL1A2,COL3A1

## Sheet: Pathways_HCC827 (TCFs)
¬© 2000-2020 QIAGEN. All rights reserved.
Ingenuity Canonical Pathways	-log(p-value)	Ratio	z-score	Molecules
Hepatic Fibrosis / Hepatic Stellate Cell Activation	17.7	0.204	NaN	ACTA2,CCL2,COL13A1,COL1A1,COL1A2,COL4A1,COL5A1,COL5A2,COL6A1,COL6A2,COL6A3,COL7A1,COL8A1,ECE1,EDN1,EDNRA,FAS,FGF2,FGFR1,FLT1,FN1,IGFBP4,IGFBP5,IL1R1,IL6,MMP2,MYL9,PDGFRA,PDGFRB,SERPINE1,STAT1,TGFB1,TIMP1,TIMP2,TNFRSF11B,VEGFA,VEGFB,VEGFC
Interferon Signaling	11	0.389	3.051	IFI35,IFIT1,IFIT3,IFITM1,IFITM2,IFITM3,IRF1,IRF9,MX1,OAS1,SOCS1,STAT1,STAT2,TAP1
Role of Macrophages, Fibroblasts and Endothelial Cells in Rheumatoid Arthritis	7.48	0.106	NaN	ADAMTS4,CAMK4,CCL2,DKK3,FGF2,FN1,FZD1,IL15,IL17RC,IL18,IL1R1,IL6,IRAK3,LRP1,LTA,MAP2K3,MRAS,MYD88,NFATC1,NFATC4,PPP3CC,SOCS1,SOCS3,TCF4,TGFB1,TNFRSF11B,TNFSF13B,VEGFA,VEGFB,VEGFC,WNT11,WNT5A,WNT5B
Hepatic Fibrosis Signaling Pathway	7.23	0.0978	4.902	ACTA2,ACVR1,CAMK4,CCL2,COL1A1,COL1A2,EDN1,EDNRA,FGF2,FGFR1,FLT1,FZD1,GLI3,IL18,IL1R1,IRAK3,ITGA5,ITGB3,MAP2K3,MRAS,MYD88,MYL9,PDGFRA,PDGFRB,SERPINE1,SNAI1,TCF4,TGFB1,TIMP1,TNFRSF11B,VEGFA,VEGFB,VEGFC,WNT11,WNT5A,WNT5B
Inhibition of Matrix Metalloproteases	7.1	0.282	-0.333	ADAM12,LRP1,MMP14,MMP19,MMP2,MMP24,MMP28,SDC2,THBS2,TIMP1,TIMP2
Role of Osteoblasts, Osteoclasts and Chondrocytes in Rheumatoid Arthritis	6.98	0.118	NaN	ADAMTS4,BIRC3,BMP1,CAMK4,COL1A1,DKK3,DLX5,FZD1,IL11,IL18,IL1R1,IL6,ITGA5,ITGB3,LRP1,MAP2K3,MMP14,NFATC1,NFATC4,PPP3CC,TCF4,TGFB1,TNFRSF11B,WNT11,WNT5A,WNT5B
Human Embryonic Stem Cell Pluripotency	6.43	0.141	NaN	ACVR1,BDNF,BMP1,FGF2,FGFR1,FZD1,INHBA,MRAS,NTF3,PDGFRA,PDGFRB,S1PR2,S1PR3,S1PR4,TCF4,TGFB1,WNT11,WNT5A,WNT5B
Axonal Guidance Signaling	6.4	0.0845	NaN	ABLIM3,ADAM12,ADAMTS12,ADAMTS2,ADAMTS4,ARHGEF6,BDNF,BMP1,EPHB1,FZD1,GLI3,GNB4,GNG2,ITGA5,MMP14,MMP2,MMP24,MMP28,MRAS,MYL9,NFATC1,NFATC4,NRP1,NTF3,PAPPA,PLXNA3,PLXNC1,PPP3CC,RGS3,ROBO1,SDC2,SEMA4B,SEMA4C,SEMA5A,UNC5B,VEGFA,VEGFB,VEGFC,WNT11,WNT5A,WNT5B
Cardiac Hypertrophy Signaling (Enhanced)	5.94	0.0821	4.439	ACVR1,ADRB2,CAMK4,CTF1,EDN1,EDNRA,FGF2,FGF7,FGFR1,FZD1,GNG2,IL11,IL15,IL15RA,IL17RC,IL18,IL1R1,IL22RA1,IL6,IL7R,ITGA5,LTA,MAP2K3,MPPE1,MRAS,NFATC1,NFATC4,PDE1C,PDE7B,PLD6,PPP3CC,PRKG1,RCAN1,TGFB1,TNFRSF11B,TNFSF10,TNFSF13B,WNT11,WNT5A,WNT5B
GP6 Signaling Pathway	5.91	0.143	4.123	CAMK4,COL13A1,COL1A1,COL1A2,COL4A1,COL5A1,COL5A2,COL6A1,COL6A2,COL6A3,COL7A1,COL8A1,ITGB3,LAMA4,LAMB2,LAT,TLN1
Osteoarthritis Pathway	5.63	0.109	3	ADAMTS4,CASP1,DCN,DDR2,DLX5,FGF2,FGFR1,FN1,FZD1,GDF5,GLI3,GREM1,HTRA1,IL1R1,ITGA5,LRP1,S1PR2,S1PR3,TCF4,TGFB1,VEGFA,VEGFB,VEGFC
Regulation of the Epithelial-Mesenchymal Transition Pathway	4.69	0.104	NaN	APH1B,CDH2,FGF2,FGF7,FGFR1,FOXC2,FZD1,LOX,MAP2K3,MMP2,MRAS,NOTCH3,PDGFRB,SNAI1,TCF4,TGFB1,WNT11,WNT5A,WNT5B,ZEB2
STAT3 Pathway	4.55	0.119	1.732	FGF2,FGFR1,FLT1,IL15RA,IL17RC,IL1R1,IL22RA1,IL7R,MRAS,PDGFRA,PDGFRB,SOCS1,SOCS3,SOCS5,TGFB1,VEGFA
Neuroinflammation Signaling Pathway	4.47	0.0867	2.858	ACVR1,APH1B,B2M,BDNF,BIRC3,CASP1,CCL2,FAS,FZD1,GABBR1,HLA-C,IL18,IL1R1,IL6,IRAK3,IRF7,MFGE8,MYD88,NFATC1,NFATC4,NTF3,PLA2G4F,PPP3CC,PYCARD,STAT1,TGFB1
Type I Diabetes Mellitus Signaling	4.36	0.126	1.155	BID,FAS,HLA-C,IL1R1,IRF1,LTA,MAP2K3,MYD88,PTPRN,SOCS1,SOCS3,SOCS5,STAT1,TNFRSF11B
Activation of IRF by Cytosolic Pattern Recognition Receptors	4.12	0.159	2.53	DDX58,DHX58,IFIH1,IL6,IRF7,IRF9,LTA,PPIB,STAT1,STAT2
Acute Phase Response Signaling	3.59	0.095	0	C1S,FN1,IL18,IL1R1,IL6,MAP2K3,MRAS,MYD88,NOLC1,SERPINE1,SERPINF1,SERPING1,SOCS1,SOCS3,SOCS5,TCF4,TNFRSF11B
Granulocyte Adhesion and Diapedesis	3.59	0.095	NaN	CCL2,CD99,CXCL11,EZR,IL18,IL1R1,ITGA5,ITGB3,JAM3,MMP14,MMP19,MMP2,MMP24,MMP28,SDC2,THY1,TNFRSF11B
Apelin Liver Signaling Pathway	3.58	0.231	0.816	COL1A1,COL1A2,EDN1,EDN2,FAS,PDGFRB
Crosstalk between Dendritic Cells and Natural Killer Cells	3.47	0.124	1.89	ACTA2,FAS,HLA-C,IL15,IL15RA,IL18,IL6,LTA,MICA,TLN1,TNFSF10
IL-15 Production	3.39	0.107	NaN	DDR2,DYRK3,EPHB1,FGFR1,FLT1,FLT3LG,IL15,IL6,IRF1,MAP2K3,PDGFRA,PDGFRB,STAT1
Role of Pattern Recognition Receptors in Recognition of Bacteria and Viruses	3.35	0.0974	2.449	CASP1,DDX58,IFIH1,IL11,IL15,IL18,IL6,IRF7,LTA,MYD88,OAS1,OAS2,TGFB1,TNFSF10,TNFSF13B
Inflammasome pathway	3.24	0.25	1.342	AIM2,CASP1,IL18,MYD88,PYCARD
Bladder Cancer Signaling	3.15	0.113	NaN	FGF2,FGF7,MMP14,MMP19,MMP2,MMP24,MMP28,MRAS,VEGFA,VEGFB,VEGFC
Chondroitin Sulfate Biosynthesis	3.09	0.143	2.828	CHPF2,CHST10,CHST2,CHST7,CSGALNACT2,HS3ST3A1,HS3ST3B1,SULT1B1
Colorectal Cancer Metastasis Signaling	3.07	0.0791	3.638	FZD1,GNB4,GNG2,IL6,LRP1,MMP14,MMP19,MMP2,MMP24,MMP28,MRAS,STAT1,TCF4,TGFB1,VEGFA,VEGFB,VEGFC,WNT11,WNT5A,WNT5B
Systemic Lupus Erythematosus In B Cell Signaling Pathway	3	0.0764	4.146	CAMK4,IFIH1,IFIT3,IL11,IL15,IL18,IL6,IRF7,IRF9,LTA,MRAS,MYD88,NFATC1,NFATC4,PPP3CC,STAT1,STAT2,STING1,TGFB1,TNFSF10,TNFSF13B
Dermatan Sulfate Biosynthesis	2.93	0.136	2.828	CHPF2,CHST10,CHST2,CHST7,CSGALNACT2,HS3ST3A1,HS3ST3B1,SULT1B1
Retinoic acid Mediated Apoptosis Signaling	2.88	0.133	2.828	BID,IRF1,PARP10,PARP11,PARP6,PARP9,RARB,TNFSF10
Th1 and Th2 Activation Pathway	2.88	0.0877	NaN	ACVR1,APH1B,CRLF2,IL18,IL6,IRF1,LTA,NFATC1,NFATC4,NOTCH3,PTGDR2,SOCS1,SOCS3,STAT1,TGFB1
Ovarian Cancer Signaling	2.82	0.0935	1.89	EDN1,EDNRA,FZD1,MMP2,MRAS,PTGS1,TCF4,VEGFA,VEGFB,VEGFC,WNT11,WNT5A,WNT5B
Chondroitin Sulfate Biosynthesis (Late Stages)	2.82	0.146	2.646	CHST10,CHST2,CHST7,CSGALNACT2,HS3ST3A1,HS3ST3B1,SULT1B1
Agranulocyte Adhesion and Diapedesis	2.8	0.0833	NaN	ACTA2,CCL2,CD99,CXCL11,EZR,FN1,IL18,IL1R1,ITGA5,JAM3,MMP14,MMP19,MMP2,MMP24,MMP28,MYL9
HOTAIR Regulatory Pathway	2.74	0.0881	2.673	COL1A1,COL1A2,IRF1,MMP14,MMP19,MMP2,MMP24,MMP28,TCF4,TGFB1,VIM,WNT11,WNT5A,WNT5B
HIF1α Signaling	2.6	0.0973	NaN	EDN1,MMP14,MMP19,MMP2,MMP24,MMP28,MRAS,SLC2A3,VEGFA,VEGFB,VEGFC
HMGB1 Signaling	2.59	0.0848	1.265	CCL2,IL11,IL15,IL18,IL1R1,IL6,LTA,MAP2K3,MRAS,SERPINE1,TGFB1,TNFRSF11B,TNFSF10,TNFSF13B
LPS/IL-1 Mediated Inhibition of RXR Function	2.51	0.0759	0.447	ALDH1L2,CHST10,CHST2,CHST7,CPT1C,FABP3,GSTM2,HS3ST3A1,HS3ST3B1,IL18,IL1R1,MYD88,PLTP,SMOX,SOD3,SULT1B1,TNFRSF11B
Role of JAK1 and JAK3 in Œ≥c Cytokine Signaling	2.49	0.116	NaN	CRLF2,IL15,IL15RA,IL7R,MRAS,SOCS1,SOCS3,STAT1
Th1 Pathway	2.37	0.0909	0.333	APH1B,IL18,IL6,IRF1,LTA,NFATC1,NFATC4,NOTCH3,SOCS1,SOCS3,STAT1
Leukocyte Extravasation Signaling	2.29	0.0761	0.832	ACTA2,CD99,DLC1,EZR,ITGA5,ITGB3,JAM3,MMP14,MMP19,MMP2,MMP24,MMP28,THY1,TIMP1,TIMP2
Death Receptor Signaling	2.27	0.0989	3	ACTA2,BID,BIRC3,FAS,PARP10,PARP11,PARP6,PARP9,TNFSF10
IL-6 Signaling	2.27	0.088	0.905	COL1A1,IL18,IL1R1,IL6,MAP2K3,MRAS,SOCS1,SOCS3,TNFAIP6,TNFRSF11B,VEGFA
RhoGDI Signaling	2.25	0.0778	-2.887	ACTA2,ARHGEF2,ARHGEF6,CDH11,CDH13,CDH2,CDH6,DLC1,EZR,GNB4,GNG2,ITGA5,MRAS,MYL9
Dermatan Sulfate Biosynthesis (Late Stages)	2.24	0.13	2.449	CHST10,CHST2,CHST7,HS3ST3A1,HS3ST3B1,SULT1B1
Role of JAK2 in Hormone-like Cytokine Signaling	2.16	0.147	NaN	SH2B3,SOCS1,SOCS3,SOCS5,STAT1
Netrin Signaling	2.07	0.108	1.89	ABLIM3,CACNB3,NFATC1,NFATC4,PPP3CC,PRKG1,UNC5B
Wnt/β-catenin Signaling	2.01	0.0751	0.905	ACVR1,CDH2,DKK3,FRAT1,FZD1,LRP1,RARB,TCF4,TGFB1,TLE4,WNT11,WNT5A,WNT5B
Complement System	2	0.135	-1	C1S,CD59,CFH,CFI,SERPING1
Clathrin-mediated Endocytosis Signaling	2	0.0725	NaN	ACTA2,DAB2,FGF2,FGF7,ITGA5,ITGB3,ITGB5,PPP3CC,RAB4B,SH3GL3,SNX9,VEGFA,VEGFB,VEGFC
Role of JAK family kinases in IL-6-type Cytokine Signaling	1.94	0.16	NaN	IL6,SOCS1,SOCS3,STAT1
Protein Citrullination	1.92	0.4	NaN	PADI2,PADI3
IL-8 Signaling	1.87	0.07	3.051	FLT1,GNB4,GNG2,IRAK3,ITGB3,ITGB5,MMP2,MRAS,MYL9,PLD3,PLD6,VEGFA,VEGFB,VEGFC
Basal Cell Carcinoma Signaling	1.84	0.0972	1.633	BMP1,FZD1,GLI3,TCF4,WNT11,WNT5A,WNT5B
Sperm Motility	1.82	0.0673	2.449	CAMK4,DDR2,DYRK3,EPHB1,FGFR1,FLT1,FLT3LG,MAP2K3,MRAS,PDE1C,PDGFRA,PDGFRB,PLA2G4F,PLA2R1,PRKG1
Dendritic Cell Maturation	1.82	0.071	3.051	B2M,COL1A1,COL1A2,DDR2,HLA-C,IL15,IL18,IL6,LTA,MYD88,STAT1,STAT2,TNFRSF11B
Hepatic Cholestasis	1.8	0.0707	NaN	CYP27A1,IL11,IL15,IL18,IL1R1,IL6,IRAK3,LTA,MYD88,TGFB1,TNFRSF11B,TNFSF10,TNFSF13B
Caveolar-mediated Endocytosis Signaling	1.8	0.0959	NaN	ACTA2,B2M,DYRK3,HLA-C,ITGA5,ITGB3,ITGB5
Th17 Activation Pathway	1.78	0.0879	2.828	DEFB103A/DEFB103B,IL1R1,IL6,IRAK3,MYD88,NFATC1,NFATC4,SOCS3
Chondroitin and Dermatan Biosynthesis	1.76	0.333	NaN	CHPF2,CSGALNACT2
TREM1 Signaling	1.74	0.0933	1.89	CASP1,CCL2,IL18,IL6,ITGA5,MYD88,NLRC5
cAMP-mediated signaling	1.74	0.0658	1.387	ADRB2,AKAP12,CAMK4,GABBR1,MPPE1,NPR3,PALM2AKAP2,PDE1C,PDE7B,PLD6,PPP3CC,PTGIR,RGS14,RGS4,S1PR3
Vitamin-C Transport	1.74	0.188	NaN	GLRX,SLC2A3,TXNRD1
Factors Promoting Cardiogenesis in Vertebrates	1.73	0.086	NaN	ACVR1,BMP1,CDC6,FZD1,LRP1,TCF4,TGFB1,WNT11
ILK Signaling	1.7	0.0684	3.317	ACTA2,ARHGEF6,FN1,ITGB3,ITGB5,LIMS2,MYL9,SNAI1,TGFB1I1,VEGFA,VEGFB,VEGFC,VIM
iNOS Signaling	1.66	0.111	NaN	CAMK4,IRAK3,IRF1,MYD88,STAT1
FAT10 Cancer Signaling Pathway	1.62	0.109	2.236	ACVR1,IL6,TCF4,TGFB1,TNFRSF11B
T Cell Exhaustion Signaling Pathway	1.61	0.0686	3.162	ACVR1,HLA-C,IL6,IRF9,MRAS,NFATC1,NFATC4,STAT1,STAT2,TGFB1,TNFRSF14,VEGFA
IL-17 Signaling	1.61	0.0875	NaN	CCL2,CXCL11,IL17RC,IL6,MAP2K3,MRAS,TIMP1
JAK/Stat Signaling	1.61	0.0875	0.378	IL6,MRAS,SOCS1,SOCS3,SOCS5,STAT1,STAT2
p38 MAPK Signaling	1.58	0.0763	1.667	DUSP10,FAS,IL18,IL1R1,IRAK3,MAP2K3,PLA2G4F,STAT1,TGFB1
PEDF Signaling	1.56	0.0854	1.89	ARHGAP22,BDNF,FAS,MRAS,PNPLA2,SERPINF1,TCF4
NF-kB Signaling	1.55	0.067	2.309	FGFR1,FLT1,IL18,IL1R1,IRAK3,LTA,MRAS,MYD88,PDGFRA,PDGFRB,TNFRSF11B,TNFSF13B
Signaling by Rho Family GTPases	1.51	0.0615	3.051	ACTA2,ARHGEF2,ARHGEF6,CDC42EP5,CDH11,CDH13,CDH2,CDH6,EZR,GNB4,GNG2,ITGA5,MRAS,MYL9,VIM
Cardiac β-adrenergic Signaling	1.51	0.0709	0.816	AKAP12,GNB4,GNG2,MPPE1,MRAS,PALM2AKAP2,PDE1C,PDE7B,PLD6,PPP1R3C
VEGF Family Ligand-Receptor Interactions	1.51	0.0833	2.449	FLT1,MRAS,NRP1,PLA2G4F,VEGFA,VEGFB,VEGFC
Salvage Pathways of Pyrimidine Deoxyribonucleotides	1.51	0.25	NaN	APOBEC3B,APOBEC3G
Cytotoxic T Lymphocyte-mediated Apoptosis of Target Cells	1.49	0.118	NaN	B2M,BID,FAS,HLA-C
Endocannabinoid Cancer Inhibition Pathway	1.47	0.0699	-1.265	CASP1,MAP2K3,MMP2,NUPR1,SMPD1,TCF4,VEGFA,VEGFB,VEGFC,VIM
Coagulation System	1.45	0.114	-1	BDKRB1,F10,SERPINA5,SERPINE1
Atherosclerosis Signaling	1.42	0.0714	NaN	CCL2,COL1A1,COL1A2,IL18,IL6,PLA2G4F,PLA2R1,TGFB1,TNFRSF14
Regulation of IL-2 Expression in Activated and Anergic T Lymphocytes	1.39	0.0787	NaN	CAMK4,LAT,MRAS,NFATC1,NFATC4,PPP3CC,TGFB1
Heparan Sulfate Biosynthesis (Late Stages)	1.38	0.0845	2.449	CHST10,CHST2,CHST7,HS3ST3A1,HS3ST3B1,SULT1B1
Notch Signaling	1.37	0.108	NaN	APH1B,HES7,NOTCH3,RFNG
Altered T Cell and B Cell Signaling in Rheumatoid Arthritis	1.37	0.0778	NaN	FAS,IL15,IL18,IL6,LTA,TGFB1,TNFSF13B
White Adipose Tissue Browning Pathway	1.37	0.0698	2.333	BDNF,CACNB3,FGFR1,FOXC2,PRKG1,RARB,RUNX1T1,THRA,VEGFA
Phospholipase C Signaling	1.35	0.0584	3.464	ARHGEF2,ARHGEF6,CAMK4,GNB4,GNG2,ITGA5,LAT,MRAS,MYL9,NFATC1,NFATC4,PLA2G4F,PLD3,PLD6,PPP3CC
IL-1 Signaling	1.34	0.0769	1.342	GNB4,GNG2,IL1R1,IRAK3,MAP2K3,MRAS,MYD88
Role of NFAT in Cardiac Hypertrophy	1.34	0.0607	2.309	CACNB3,CAMK4,CTF1,GNB4,GNG2,IL11,IL6,MAP2K3,MRAS,NFATC4,PPP3CC,RCAN1,TGFB1
Apelin Cardiac Fibroblast Signaling Pathway	1.32	0.13	NaN	IL6,SERPINE1,TGFB1
Glioma Invasiveness Signaling	1.3	0.0811	0.816	ITGB3,ITGB5,MMP2,MRAS,TIMP1,TIMP2
Antigen Presentation Pathway	1.3	0.103	NaN	B2M,HLA-C,NLRC5,TAP1

## Sheet: Diseases&Funct._HCC827 (NFs)
¬© 2000-2020 QIAGEN. All rights reserved.
Categories	Diseases or Functions Annotation	p-value	Predicted Activation State	Activation z-score	Molecules	# Molecules
Cancer,Organismal Injury and Abnormalities	Nonhematologic malignant neoplasm	9.11e-52		-0.595	AAMDC,ABCC2,ABHD12B,ABL2,ABLIM1,ABTB2,ACMSD,ACOT6,ACP3,ACTA2,ACTG2,ADAD2,ADAMTS16,ADAMTSL3,ADORA1,ADORA2A,ADRA1B,ADRB1,AGA,AGAP1,AGAP5 (includes others),AGBL3,AGFG2,AGL,AGTPBP1,AHCTF1,AIF1L,AIM2,AJUBA,AKAP13,AKR1B10,AKR1B15,ALDH1A3,ALG1L,ALOX12B,AMH,AMPD3,ANAPC1,ANAPC2,ANGPTL4,ANKHD1/ANKHD1-EIF4EBP3,ANKRD13B,ANKRD17,ANKRD18B,ANKRD2,ANKRD22,ANKRD23,ANKRD28,ANKRD31,ANKRD33B,ANKRD34A,ANKRD36C,ANKS1A…	998
Cancer,Organismal Injury and Abnormalities	Non-hematological solid tumor	6.42e-51		-0.341	AAMDC,ABCC2,ABHD12B,ABL2,ABLIM1,ABTB2,ACMSD,ACOT6,ACP3,ACTA2,ACTG2,ADAD2,ADAMTS16,ADAMTSL3,ADORA1,ADORA2A,ADRA1B,ADRB1,AGA,AGAP1,AGAP5 (includes others),AGBL3,AGFG2,AGL,AGTPBP1,AHCTF1,AIF1L,AIM2,AJUBA,AKAP13,AKR1B10,AKR1B15,ALDH1A3,ALG1L,ALOX12B,AMH,AMPD3,ANAPC1,ANAPC2,ANGPTL4,ANKHD1/ANKHD1-EIF4EBP3,ANKRD13B,ANKRD17,ANKRD18B,ANKRD2,ANKRD22,ANKRD23,ANKRD28,ANKRD31,ANKRD33B,ANKRD34A,ANKRD36C,ANKS1A…	999
Cancer,Organismal Injury and Abnormalities	Tumorigenesis of tissue	1.52e-50		-1.818	AAMDC,ABCC2,ABHD12B,ABL2,ABLIM1,ABTB2,ACMSD,ACP3,ACTA2,ACTG2,ADAD2,ADAMTS16,ADAMTSL3,ADORA1,ADORA2A,ADRA1B,ADRB1,AGA,AGAP1,AGAP5 (includes others),AGBL3,AGFG2,AGL,AGTPBP1,AHCTF1,AIF1L,AIM2,AJUBA,AKAP13,AKR1B10,AKR1B15,ALDH1A3,ALG1L,ALOX12B,AMH,AMPD3,ANAPC1,ANAPC2,ANGPTL4,ANKHD1/ANKHD1-EIF4EBP3,ANKRD13B,ANKRD17,ANKRD18B,ANKRD2,ANKRD22,ANKRD23,ANKRD28,ANKRD31,ANKRD33B,ANKRD34A,ANKRD36C,ANKS1A,ANO2,…	991
Cancer,Organismal Injury and Abnormalities	Non-melanoma solid tumor	2.69e-50		-0.559	AAMDC,ABCC2,ABHD12B,ABL2,ABLIM1,ABTB2,ACMSD,ACP3,ACTA2,ACTG2,ADAD2,ADAMTS16,ADAMTSL3,ADORA1,ADORA2A,ADRA1B,ADRB1,AGA,AGAP1,AGAP5 (includes others),AGBL3,AGFG2,AGL,AGTPBP1,AHCTF1,AIF1L,AIM2,AJUBA,AKAP13,AKR1B10,AKR1B15,ALDH1A3,ALG1L,ALOX12B,AMH,AMPD3,ANAPC1,ANAPC2,ANGPTL4,ANKHD1/ANKHD1-EIF4EBP3,ANKRD13B,ANKRD17,ANKRD18B,ANKRD2,ANKRD22,ANKRD23,ANKRD28,ANKRD31,ANKRD33B,ANKRD34A,ANKRD36C,ANKS1A,ANO2,…	993
Cancer,Organismal Injury and Abnormalities	Carcinoma	3.65e-50		-1.369	AAMDC,ABCC2,ABHD12B,ABL2,ABLIM1,ABTB2,ACMSD,ACP3,ACTA2,ACTG2,ADAD2,ADAMTS16,ADAMTSL3,ADORA1,ADORA2A,ADRA1B,ADRB1,AGA,AGAP1,AGAP5 (includes others),AGBL3,AGFG2,AGL,AGTPBP1,AHCTF1,AIF1L,AIM2,AJUBA,AKAP13,AKR1B10,AKR1B15,ALDH1A3,ALG1L,ALOX12B,AMH,AMPD3,ANAPC1,ANAPC2,ANGPTL4,ANKHD1/ANKHD1-EIF4EBP3,ANKRD13B,ANKRD17,ANKRD18B,ANKRD2,ANKRD22,ANKRD23,ANKRD28,ANKRD31,ANKRD33B,ANKRD34A,ANKRD36C,ANKS1A,ANO2,…	987
Cancer,Organismal Injury and Abnormalities	Epithelial neoplasm	4.36e-50		-1.066	AAMDC,ABCC2,ABHD12B,ABL2,ABLIM1,ABTB2,ACMSD,ACP3,ACTA2,ACTG2,ADAD2,ADAMTS16,ADAMTSL3,ADORA1,ADORA2A,ADRA1B,ADRB1,AGA,AGAP1,AGAP5 (includes others),AGBL3,AGFG2,AGL,AGTPBP1,AHCTF1,AIF1L,AIM2,AJUBA,AKAP13,AKR1B10,AKR1B15,ALDH1A3,ALG1L,ALOX12B,AMH,AMPD3,ANAPC1,ANAPC2,ANGPTL4,ANKHD1/ANKHD1-EIF4EBP3,ANKRD13B,ANKRD17,ANKRD18B,ANKRD2,ANKRD22,ANKRD23,ANKRD28,ANKRD31,ANKRD33B,ANKRD34A,ANKRD36C,ANKS1A,ANO2,…	988
Cancer,Organismal Injury and Abnormalities	Adenocarcinoma	1.9e-48		0.446	AAMDC,ABCC2,ABHD12B,ABL2,ABLIM1,ABTB2,ACMSD,ACP3,ACTA2,ACTG2,ADAD2,ADAMTS16,ADAMTSL3,ADORA1,ADORA2A,ADRA1B,ADRB1,AGA,AGAP1,AGAP5 (includes others),AGBL3,AGFG2,AGL,AGTPBP1,AHCTF1,AIM2,AJUBA,AKAP13,AKR1B10,AKR1B15,ALDH1A3,ALOX12B,AMH,AMPD3,ANAPC1,ANAPC2,ANGPTL4,ANKHD1/ANKHD1-EIF4EBP3,ANKRD13B,ANKRD17,ANKRD22,ANKRD23,ANKRD28,ANKRD31,ANKRD33B,ANKRD34A,ANKRD36C,ANKS1A,ANO2,ANTXR2,ANXA9,AOC2,AP1G1,AP4E…	904
Cancer,Organismal Injury and Abnormalities	Head and neck tumor	1.04e-47		-0.014	ABCC2,ABHD12B,ABL2,ABLIM1,ABTB2,ACMSD,ACTA2,ACTG2,ADAD2,ADAMTS16,ADAMTSL3,ADORA1,ADRB1,AGA,AGAP1,AGAP5 (includes others),AGFG2,AGL,AGTPBP1,AHCTF1,AIF1L,AJUBA,AKAP13,AKR1B15,ALDH1A3,ALG1L,ALOX12B,AMH,AMPD3,ANAPC1,ANAPC2,ANGPTL4,ANKHD1/ANKHD1-EIF4EBP3,ANKRD13B,ANKRD17,ANKRD18B,ANKRD2,ANKRD22,ANKRD23,ANKRD28,ANKRD31,ANKRD33B,ANKRD36C,ANKS1A,ANO2,ANTXR2,ANXA9,AOC2,AP1G1,AP4E1,APLP1,ARFGEF1,ARFGEF2,AR…	858
Cancer,Organismal Injury and Abnormalities	Malignant solid tumor	1.23e-47		-0.156	AAMDC,ABCC2,ABHD12B,ABL2,ABLIM1,ABTB2,ACMSD,ACOT6,ACP3,ACTA2,ACTG2,ADAD2,ADAMTS16,ADAMTSL3,ADGRF1,ADORA1,ADORA2A,ADRA1B,ADRB1,AGA,AGAP1,AGAP5 (includes others),AGBL3,AGFG2,AGL,AGTPBP1,AHCTF1,AIF1L,AIM2,AJUBA,AKAP13,AKR1B10,AKR1B15,ALDH1A3,ALG1L,ALOX12B,AMH,AMPD3,ANAPC1,ANAPC2,ANGPTL4,ANKHD1/ANKHD1-EIF4EBP3,ANKRD13B,ANKRD17,ANKRD18B,ANKRD2,ANKRD22,ANKRD23,ANKRD28,ANKRD31,ANKRD33B,ANKRD34A,ANKRD36C…	1005
Cancer,Organismal Injury and Abnormalities	Head and neck carcinoma	4.65e-47		0	ABCC2,ABHD12B,ABL2,ABLIM1,ABTB2,ACMSD,ACTA2,ACTG2,ADAD2,ADAMTS16,ADAMTSL3,ADORA1,ADRB1,AGA,AGAP1,AGAP5 (includes others),AGFG2,AGL,AGTPBP1,AHCTF1,AIF1L,AJUBA,AKAP13,AKR1B15,ALDH1A3,ALG1L,ALOX12B,AMH,AMPD3,ANAPC1,ANAPC2,ANGPTL4,ANKHD1/ANKHD1-EIF4EBP3,ANKRD13B,ANKRD17,ANKRD18B,ANKRD2,ANKRD22,ANKRD23,ANKRD28,ANKRD31,ANKRD33B,ANKRD36C,ANKS1A,ANO2,ANTXR2,ANXA9,AOC2,AP1G1,AP4E1,APLP1,ARFGEF1,ARFGEF2,AR…	847
Cancer,Organismal Injury and Abnormalities	Cancer	1.54e-46		-0.929	AAMDC,ABCC2,ABHD12B,ABL2,ABLIM1,ABTB2,ACMSD,ACOT6,ACP3,ACTA2,ACTG2,ADAD2,ADAMTS16,ADAMTSL3,ADGRF1,ADORA1,ADORA2A,ADRA1B,ADRB1,AGA,AGAP1,AGAP5 (includes others),AGBL3,AGFG2,AGL,AGTPBP1,AHCTF1,AIF1L,AIM2,AJUBA,AKAP13,AKR1B10,AKR1B15,ALDH1A3,ALG1L,ALOX12B,AMH,AMPD3,ANAPC1,ANAPC2,ANGPTL4,ANKHD1/ANKHD1-EIF4EBP3,ANKRD13B,ANKRD17,ANKRD18B,ANKRD2,ANKRD22,ANKRD23,ANKRD28,ANKRD31,ANKRD33B,ANKRD34A,ANKRD36C…	1007
Cancer,Endocrine System Disorders,Organismal Injury and Abnormalities	Endocrine gland tumor	2.18e-46		-0.068	ABCC2,ABHD12B,ABL2,ABLIM1,ABTB2,ACMSD,ACTA2,ACTG2,ADAD2,ADAMTS16,ADAMTSL3,ADRA1B,ADRB1,AGA,AGAP1,AGAP5 (includes others),AGFG2,AGL,AGTPBP1,AHCTF1,AIF1L,AKAP13,AKR1B15,ALDH1A3,ALG1L,ALOX12B,AMH,AMPD3,ANAPC1,ANAPC2,ANGPTL4,ANKHD1/ANKHD1-EIF4EBP3,ANKRD13B,ANKRD17,ANKRD18B,ANKRD2,ANKRD22,ANKRD23,ANKRD28,ANKRD31,ANKRD33B,ANKRD36C,ANKS1A,ANO2,ANTXR2,ANXA9,AOC2,AP1G1,AP4E1,APLP1,ARFGEF1,ARFGEF2,ARHGAP42…	826
Cancer,Organismal Injury and Abnormalities	Head and neck cancer	4.84e-46		0.074	ABCC2,ABHD12B,ABL2,ABLIM1,ABTB2,ACMSD,ACTA2,ACTG2,ADAD2,ADAMTS16,ADAMTSL3,ADORA1,ADRB1,AGA,AGAP1,AGAP5 (includes others),AGFG2,AGL,AGTPBP1,AHCTF1,AIF1L,AJUBA,AKAP13,AKR1B15,ALDH1A3,ALG1L,ALOX12B,AMH,AMPD3,ANAPC1,ANAPC2,ANGPTL4,ANKHD1/ANKHD1-EIF4EBP3,ANKRD13B,ANKRD17,ANKRD18B,ANKRD2,ANKRD22,ANKRD23,ANKRD28,ANKRD31,ANKRD33B,ANKRD36C,ANKS1A,ANO2,ANTXR2,ANXA9,AOC2,AP1G1,AP4E1,APLP1,ARFGEF1,ARFGEF2,AR…	848
Cancer,Organismal Injury and Abnormalities	Abdominal carcinoma	5.9e-46		-0.97	AAMDC,ABCC2,ABHD12B,ABL2,ABLIM1,ABTB2,ACMSD,ACP3,ACTA2,ACTG2,ADAD2,ADAMTS16,ADAMTSL3,ADORA1,ADORA2A,ADRA1B,ADRB1,AGA,AGAP1,AGAP5 (includes others),AGBL3,AGFG2,AGL,AGTPBP1,AHCTF1,AIM2,AJUBA,AKAP13,AKR1B10,AKR1B15,ALDH1A3,ALOX12B,AMH,AMPD3,ANAPC1,ANAPC2,ANGPTL4,ANKHD1/ANKHD1-EIF4EBP3,ANKRD13B,ANKRD17,ANKRD18B,ANKRD22,ANKRD23,ANKRD28,ANKRD31,ANKRD33B,ANKRD34A,ANKRD36C,ANKS1A,ANO2,ANTXR2,ANXA9,AOC2,A…	923
Cancer,Endocrine System Disorders,Organismal Injury and Abnormalities	Nonpituitary endocrine tumor	6.58e-46		0.192	ABCC2,ABHD12B,ABL2,ABLIM1,ABTB2,ACMSD,ACTA2,ACTG2,ADAD2,ADAMTS16,ADAMTSL3,ADRA1B,ADRB1,AGA,AGAP1,AGAP5 (includes others),AGFG2,AGL,AGTPBP1,AHCTF1,AIF1L,AKAP13,AKR1B15,ALDH1A3,ALG1L,ALOX12B,AMH,AMPD3,ANAPC1,ANAPC2,ANGPTL4,ANKHD1/ANKHD1-EIF4EBP3,ANKRD13B,ANKRD17,ANKRD18B,ANKRD2,ANKRD22,ANKRD23,ANKRD28,ANKRD31,ANKRD33B,ANKRD36C,ANKS1A,ANO2,ANTXR2,ANXA9,AOC2,AP1G1,AP4E1,APLP1,ARFGEF1,ARFGEF2,ARHGAP42…	822
Cancer,Organismal Injury and Abnormalities	Extracranial solid tumor	9.14e-46		-0.038	AAMDC,ABCC2,ABHD12B,ABL2,ABLIM1,ABTB2,ACMSD,ACOT6,ACP3,ACTA2,ACTG2,ADAD2,ADAMTS16,ADAMTSL3,ADGRF1,ADORA1,ADORA2A,ADRA1B,ADRB1,AGA,AGAP1,AGAP5 (includes others),AGBL3,AGFG2,AGL,AGTPBP1,AHCTF1,AIF1L,AIM2,AJUBA,AKAP13,AKR1B10,AKR1B15,ALDH1A3,ALG1L,ALOX12B,AMH,AMPD3,ANAPC1,ANAPC2,ANGPTL4,ANKHD1/ANKHD1-EIF4EBP3,ANKRD13B,ANKRD17,ANKRD18B,ANKRD2,ANKRD22,ANKRD23,ANKRD28,ANKRD31,ANKRD33B,ANKRD34A,ANKRD36C…	1002
Cancer,Organismal Injury and Abnormalities	Neck neoplasm	1.16e-45			ABCC2,ABHD12B,ABL2,ABLIM1,ABTB2,ACMSD,ACTA2,ACTG2,ADAD2,ADAMTS16,ADAMTSL3,ADORA1,ADRB1,AGA,AGAP1,AGAP5 (includes others),AGFG2,AGL,AGTPBP1,AHCTF1,AIF1L,AKAP13,AKR1B15,ALDH1A3,ALG1L,ALOX12B,AMH,AMPD3,ANAPC1,ANAPC2,ANGPTL4,ANKHD1/ANKHD1-EIF4EBP3,ANKRD13B,ANKRD17,ANKRD18B,ANKRD2,ANKRD22,ANKRD23,ANKRD28,ANKRD31,ANKRD33B,ANKRD36C,ANKS1A,ANO2,ANTXR2,ANXA9,AOC2,AP1G1,AP4E1,APLP1,ARFGEF1,ARFGEF2,ARHGAP42…	822
Cancer,Organismal Injury and Abnormalities	Solid tumor	1.23e-45		0.245	AAMDC,ABCC2,ABHD12B,ABL2,ABLIM1,ABTB2,ACMSD,ACOT6,ACP3,ACTA2,ACTG2,ADAD2,ADAMTS16,ADAMTSL3,ADGRF1,ADORA1,ADORA2A,ADRA1B,ADRB1,AGA,AGAP1,AGAP5 (includes others),AGBL3,AGFG2,AGL,AGTPBP1,AHCTF1,AIF1L,AIM2,AJUBA,AKAP13,AKR1B10,AKR1B15,ALDH1A3,ALG1L,ALOX12B,AMH,AMPD3,ANAPC1,ANAPC2,ANGPTL4,ANKHD1/ANKHD1-EIF4EBP3,ANKRD13B,ANKRD17,ANKRD18B,ANKRD2,ANKRD22,ANKRD23,ANKRD28,ANKRD31,ANKRD33B,ANKRD34A,ANKRD36C…	1006
Cancer,Gastrointestinal Disease,Organismal Injury and Abnormalities	Gastrointestinal adenocarcinoma	1.65e-45		1.067	AAMDC,ABCC2,ABL2,ABLIM1,ABTB2,ACMSD,ACP3,ACTA2,ACTG2,ADAD2,ADAMTS16,ADAMTSL3,ADORA1,ADORA2A,ADRA1B,ADRB1,AGA,AGAP1,AGAP5 (includes others),AGBL3,AGFG2,AGL,AGTPBP1,AHCTF1,AIM2,AKAP13,AKR1B10,ALDH1A3,ALOX12B,AMH,AMPD3,ANAPC1,ANAPC2,ANGPTL4,ANKHD1/ANKHD1-EIF4EBP3,ANKRD13B,ANKRD17,ANKRD22,ANKRD23,ANKRD28,ANKRD31,ANKRD33B,ANKRD34A,ANKRD36C,ANKS1A,ANTXR2,AOC2,AP1G1,AP4E1,APLP1,APOL6,ARFGEF1,ARFGEF2,ARH…	811
Cancer,Organismal Injury and Abnormalities	Abdominal adenocarcinoma	3.39e-45		-0.614	AAMDC,ABCC2,ABHD12B,ABL2,ABLIM1,ABTB2,ACMSD,ACP3,ACTA2,ACTG2,ADAD2,ADAMTS16,ADAMTSL3,ADORA1,ADORA2A,ADRA1B,ADRB1,AGA,AGAP1,AGAP5 (includes others),AGBL3,AGFG2,AGL,AGTPBP1,AHCTF1,AIM2,AJUBA,AKAP13,AKR1B10,ALDH1A3,ALOX12B,AMH,AMPD3,ANAPC1,ANAPC2,ANGPTL4,ANKHD1/ANKHD1-EIF4EBP3,ANKRD13B,ANKRD17,ANKRD22,ANKRD23,ANKRD28,ANKRD31,ANKRD33B,ANKRD34A,ANKRD36C,ANKS1A,ANO2,ANTXR2,ANXA9,AOC2,AP1G1,AP4E1,APLP1,…	884
Cancer,Endocrine System Disorders,Organismal Injury and Abnormalities	Endocrine carcinoma	3.82e-45			ABCC2,ABHD12B,ABL2,ABLIM1,ABTB2,ACMSD,ACTA2,ACTG2,ADAD2,ADAMTS16,ADAMTSL3,ADRB1,AGA,AGAP1,AGAP5 (includes others),AGFG2,AGL,AGTPBP1,AHCTF1,AIF1L,AKAP13,AKR1B15,ALDH1A3,ALG1L,ALOX12B,AMH,AMPD3,ANAPC1,ANAPC2,ANGPTL4,ANKHD1/ANKHD1-EIF4EBP3,ANKRD13B,ANKRD17,ANKRD18B,ANKRD2,ANKRD22,ANKRD23,ANKRD28,ANKRD31,ANKRD33B,ANKRD36C,ANKS1A,ANO2,ANTXR2,ANXA9,AOC2,AP1G1,AP4E1,APLP1,ARFGEF1,ARFGEF2,ARHGAP42,ARHGAP…	815
Cancer,Endocrine System Disorders,Organismal Injury and Abnormalities	Thyroid carcinoma	4.32e-45			ABCC2,ABHD12B,ABL2,ABLIM1,ABTB2,ACMSD,ACTA2,ACTG2,ADAD2,ADAMTS16,ADAMTSL3,ADRB1,AGA,AGAP1,AGAP5 (includes others),AGFG2,AGL,AGTPBP1,AHCTF1,AIF1L,AKAP13,AKR1B15,ALDH1A3,ALG1L,ALOX12B,AMH,AMPD3,ANAPC1,ANAPC2,ANGPTL4,ANKHD1/ANKHD1-EIF4EBP3,ANKRD13B,ANKRD17,ANKRD18B,ANKRD2,ANKRD22,ANKRD23,ANKRD28,ANKRD31,ANKRD33B,ANKRD36C,ANKS1A,ANO2,ANTXR2,ANXA9,AOC2,AP1G1,AP4E1,APLP1,ARFGEF1,ARFGEF2,ARHGAP42,ARHGAP…	813
Cancer,Endocrine System Disorders,Organismal Injury and Abnormalities	Thyroid gland tumor	4.67e-45			ABCC2,ABHD12B,ABL2,ABLIM1,ABTB2,ACMSD,ACTA2,ACTG2,ADAD2,ADAMTS16,ADAMTSL3,ADRB1,AGA,AGAP1,AGAP5 (includes others),AGFG2,AGL,AGTPBP1,AHCTF1,AIF1L,AKAP13,AKR1B15,ALDH1A3,ALG1L,ALOX12B,AMH,AMPD3,ANAPC1,ANAPC2,ANGPTL4,ANKHD1/ANKHD1-EIF4EBP3,ANKRD13B,ANKRD17,ANKRD18B,ANKRD2,ANKRD22,ANKRD23,ANKRD28,ANKRD31,ANKRD33B,ANKRD36C,ANKS1A,ANO2,ANTXR2,ANXA9,AOC2,AP1G1,AP4E1,APLP1,ARFGEF1,ARFGEF2,ARHGAP42,ARHGAP…	815
Cancer,Gastrointestinal Disease,Organismal Injury and Abnormalities	Large intestine carcinoma	7.44e-45			AAMDC,ABCC2,ABL2,ABLIM1,ABTB2,ACMSD,ACP3,ACTA2,ACTG2,ADAD2,ADAMTS16,ADAMTSL3,ADORA1,ADORA2A,ADRA1B,ADRB1,AGA,AGAP1,AGAP5 (includes others),AGBL3,AGFG2,AGL,AGTPBP1,AHCTF1,AIM2,AKAP13,AKR1B10,ALDH1A3,ALOX12B,AMH,AMPD3,ANAPC1,ANAPC2,ANGPTL4,ANKHD1/ANKHD1-EIF4EBP3,ANKRD13B,ANKRD17,ANKRD22,ANKRD23,ANKRD28,ANKRD31,ANKRD33B,ANKRD34A,ANKS1A,ANTXR2,AOC2,AP1G1,AP4E1,APLP1,APOL6,ARFGEF1,ARFGEF2,ARHGAP42,ARH…	800
Cancer,Organismal Injury and Abnormalities	Cancer of secretory structure	9.63e-45		-0.295	ABCC2,ABHD12B,ABL2,ABLIM1,ABTB2,ACMSD,ACP3,ACTA2,ACTG2,ADAD2,ADAMTS16,ADAMTSL3,ADRA1B,ADRB1,AGA,AGAP1,AGAP5 (includes others),AGBL3,AGFG2,AGL,AGTPBP1,AHCTF1,AIF1L,AIM2,AKAP13,AKR1B15,ALDH1A3,ALG1L,ALOX12B,AMH,AMPD3,ANAPC1,ANAPC2,ANGPTL4,ANKHD1/ANKHD1-EIF4EBP3,ANKRD13B,ANKRD17,ANKRD18B,ANKRD2,ANKRD22,ANKRD23,ANKRD28,ANKRD31,ANKRD33B,ANKRD34A,ANKRD36C,ANKS1A,ANO2,ANTXR2,ANXA9,AOC2,AP1G1,AP4E1,APLP1…	874
Cancer,Gastrointestinal Disease,Organismal Injury and Abnormalities	Large intestine adenocarcinoma	1.57e-44			AAMDC,ABCC2,ABL2,ABLIM1,ABTB2,ACMSD,ACP3,ACTA2,ACTG2,ADAD2,ADAMTS16,ADAMTSL3,ADORA1,ADORA2A,ADRA1B,ADRB1,AGA,AGAP1,AGAP5 (includes others),AGBL3,AGFG2,AGL,AGTPBP1,AHCTF1,AIM2,AKAP13,AKR1B10,ALDH1A3,ALOX12B,AMH,AMPD3,ANAPC1,ANAPC2,ANGPTL4,ANKHD1/ANKHD1-EIF4EBP3,ANKRD13B,ANKRD17,ANKRD22,ANKRD23,ANKRD28,ANKRD31,ANKRD33B,ANKRD34A,ANKS1A,ANTXR2,AOC2,AP1G1,AP4E1,APLP1,APOL6,ARFGEF1,ARFGEF2,ARHGAP42,ARH…	795
Cancer,Gastrointestinal Disease,Organismal Injury and Abnormalities	Gastrointestinal carcinoma	3.19e-44		1.432	AAMDC,ABCC2,ABL2,ABLIM1,ABTB2,ACMSD,ACP3,ACTA2,ACTG2,ADAD2,ADAMTS16,ADAMTSL3,ADORA1,ADORA2A,ADRA1B,ADRB1,AGA,AGAP1,AGAP5 (includes others),AGBL3,AGFG2,AGL,AGTPBP1,AHCTF1,AIM2,AKAP13,AKR1B10,ALDH1A3,ALOX12B,AMH,AMPD3,ANAPC1,ANAPC2,ANGPTL4,ANKHD1/ANKHD1-EIF4EBP3,ANKRD13B,ANKRD17,ANKRD22,ANKRD23,ANKRD28,ANKRD31,ANKRD33B,ANKRD34A,ANKRD36C,ANKS1A,ANTXR2,AOC2,AP1G1,AP4E1,APLP1,APOL6,ARFGEF1,ARFGEF2,ARH…	827
Cancer,Organismal Injury and Abnormalities	Abdominal neoplasm	3.08e-43		-0.335	AAMDC,ABCC2,ABHD12B,ABL2,ABLIM1,ABTB2,ACMSD,ACP3,ACTA2,ACTG2,ADAD2,ADAMTS16,ADAMTSL3,ADORA1,ADORA2A,ADRA1B,ADRB1,AGA,AGAP1,AGAP5 (includes others),AGBL3,AGFG2,AGL,AGTPBP1,AHCTF1,AIM2,AJUBA,AKAP13,AKR1B10,AKR1B15,ALDH1A3,ALG1L,ALOX12B,AMH,AMPD3,ANAPC1,ANAPC2,ANGPTL4,ANKHD1/ANKHD1-EIF4EBP3,ANKRD13B,ANKRD17,ANKRD18B,ANKRD22,ANKRD23,ANKRD28,ANKRD31,ANKRD33B,ANKRD34A,ANKRD36C,ANKS1A,ANO2,ANTXR2,ANXA9,…	947
Cancer,Gastrointestinal Disease,Organismal Injury and Abnormalities	Gastrointestinal tract cancer	9.02e-43		0.835	AAMDC,ABCC2,ABL2,ABLIM1,ABTB2,ACMSD,ACP3,ACTA2,ACTG2,ADAD2,ADAMTS16,ADAMTSL3,ADORA1,ADORA2A,ADRA1B,ADRB1,AGA,AGAP1,AGAP5 (includes others),AGBL3,AGFG2,AGL,AGTPBP1,AHCTF1,AIM2,AJUBA,AKAP13,AKR1B10,ALDH1A3,ALOX12B,AMH,AMPD3,ANAPC1,ANAPC2,ANGPTL4,ANKHD1/ANKHD1-EIF4EBP3,ANKRD13B,ANKRD17,ANKRD22,ANKRD23,ANKRD28,ANKRD31,ANKRD33B,ANKRD34A,ANKRD36C,ANKS1A,ANTXR2,AOC2,AP1G1,AP4E1,APLP1,APOL6,ARFGEF1,ARFGE…	848
Cancer,Gastrointestinal Disease,Organismal Injury and Abnormalities	Gastrointestinal tumor	1.56e-42		1.052	AAMDC,ABCC2,ABL2,ABLIM1,ABTB2,ACMSD,ACP3,ACTA2,ACTG2,ADAD2,ADAMTS16,ADAMTSL3,ADORA1,ADORA2A,ADRA1B,ADRB1,AGA,AGAP1,AGAP5 (includes others),AGBL3,AGFG2,AGL,AGTPBP1,AHCTF1,AIM2,AJUBA,AKAP13,AKR1B10,ALDH1A3,ALOX12B,AMH,AMPD3,ANAPC1,ANAPC2,ANGPTL4,ANKHD1/ANKHD1-EIF4EBP3,ANKRD13B,ANKRD17,ANKRD22,ANKRD23,ANKRD28,ANKRD31,ANKRD33B,ANKRD34A,ANKRD36C,ANKS1A,ANTXR2,AOC2,AP1G1,AP4E1,APLP1,APOL6,ARFGEF1,ARFGE…	850
Cancer,Organismal Injury and Abnormalities	Abdominal cancer	1.84e-42		-0.195	AAMDC,ABCC2,ABHD12B,ABL2,ABLIM1,ABTB2,ACMSD,ACP3,ACTA2,ACTG2,ADAD2,ADAMTS16,ADAMTSL3,ADORA1,ADORA2A,ADRA1B,ADRB1,AGA,AGAP1,AGAP5 (includes others),AGBL3,AGFG2,AGL,AGTPBP1,AHCTF1,AIM2,AJUBA,AKAP13,AKR1B10,AKR1B15,ALDH1A3,ALOX12B,AMH,AMPD3,ANAPC1,ANAPC2,ANGPTL4,ANKHD1/ANKHD1-EIF4EBP3,ANKRD13B,ANKRD17,ANKRD18B,ANKRD22,ANKRD23,ANKRD28,ANKRD31,ANKRD33B,ANKRD34A,ANKRD36C,ANKS1A,ANO2,ANTXR2,ANXA9,AOC2,A…	937
Cancer,Gastrointestinal Disease,Organismal Injury and Abnormalities	Intestinal tumor	2.88e-42		1.475	AAMDC,ABCC2,ABL2,ABLIM1,ABTB2,ACMSD,ACP3,ACTA2,ACTG2,ADAD2,ADAMTS16,ADAMTSL3,ADORA1,ADORA2A,ADRA1B,ADRB1,AGA,AGAP1,AGAP5 (includes others),AGBL3,AGFG2,AGL,AGTPBP1,AHCTF1,AIM2,AJUBA,AKAP13,AKR1B10,ALDH1A3,ALOX12B,AMH,AMPD3,ANAPC1,ANAPC2,ANGPTL4,ANKHD1/ANKHD1-EIF4EBP3,ANKRD13B,ANKRD17,ANKRD22,ANKRD23,ANKRD28,ANKRD31,ANKRD33B,ANKRD34A,ANKS1A,ANTXR2,AOC2,AP1G1,AP4E1,APLP1,APOL6,ARFGEF1,ARFGEF2,ARHGAP…	824
Cancer,Gastrointestinal Disease,Organismal Injury and Abnormalities	Malignant neoplasm of large intestine	3.54e-42		1.195	AAMDC,ABCC2,ABL2,ABLIM1,ABTB2,ACMSD,ACP3,ACTA2,ACTG2,ADAD2,ADAMTS16,ADAMTSL3,ADORA1,ADORA2A,ADRA1B,ADRB1,AGA,AGAP1,AGAP5 (includes others),AGBL3,AGFG2,AGL,AGTPBP1,AHCTF1,AIM2,AJUBA,AKAP13,AKR1B10,ALDH1A3,ALOX12B,AMH,AMPD3,ANAPC1,ANAPC2,ANGPTL4,ANKHD1/ANKHD1-EIF4EBP3,ANKRD13B,ANKRD17,ANKRD22,ANKRD23,ANKRD28,ANKRD31,ANKRD33B,ANKRD34A,ANKS1A,ANTXR2,AOC2,AP1G1,AP4E1,APLP1,APOL6,ARFGEF1,ARFGEF2,ARHGAP…	821
Cancer,Organismal Injury and Abnormalities	Incidence of tumor	4.22e-42		-0.223	ABCC2,ABHD12B,ABL2,ACMSD,ACP3,ACTA2,ACTG2,ADAMTS16,ADAMTSL3,ADORA1,ADORA2A,ADRA1B,ADRB1,AGAP5 (includes others),AGFG2,AGL,AGTPBP1,AHCTF1,AIM2,AJUBA,AKAP13,AKR1B10,AKR1B15,ALDH1A3,ALOX12B,AMH,ANAPC1,ANAPC2,ANGPTL4,ANKHD1/ANKHD1-EIF4EBP3,ANKRD13B,ANKRD22,ANKRD23,ANKRD28,ANKRD31,ANKRD36C,ANKS1A,ANO2,ANTXR2,ANXA9,AOC2,AP1G1,AP4E1,APLP1,ARFGEF1,ARFGEF2,ARHGAP44,ARHGAP5,ARHGEF26,ARHGEF5,ARHGEF7,ARID2,A…	753
Cancer,Gastrointestinal Disease,Organismal Injury and Abnormalities	Large intestine neoplasm	4.38e-42		1.58	AAMDC,ABCC2,ABL2,ABLIM1,ABTB2,ACMSD,ACP3,ACTA2,ACTG2,ADAD2,ADAMTS16,ADAMTSL3,ADORA1,ADORA2A,ADRA1B,ADRB1,AGA,AGAP1,AGAP5 (includes others),AGBL3,AGFG2,AGL,AGTPBP1,AHCTF1,AIM2,AJUBA,AKAP13,AKR1B10,ALDH1A3,ALOX12B,AMH,AMPD3,ANAPC1,ANAPC2,ANGPTL4,ANKHD1/ANKHD1-EIF4EBP3,ANKRD13B,ANKRD17,ANKRD22,ANKRD23,ANKRD28,ANKRD31,ANKRD33B,ANKRD34A,ANKS1A,ANTXR2,AOC2,AP1G1,AP4E1,APLP1,APOL6,ARFGEF1,ARFGEF2,ARHGAP…	823
Cancer,Organismal Injury and Abnormalities	Development of malignant tumor	2.45e-41		0.35	ABCC2,ABHD12B,ABL2,ACMSD,ACP3,ACTA2,ADAMTS16,ADAMTSL3,ADORA1,ADORA2A,ADRA1B,AGAP5 (includes others),AGFG2,AGL,AGTPBP1,AHCTF1,AIM2,AJUBA,AKAP13,AKR1B10,AKR1B15,ALDH1A3,ALOX12B,AMH,ANAPC1,ANAPC2,ANGPTL4,ANKHD1/ANKHD1-EIF4EBP3,ANKRD13B,ANKRD22,ANKRD23,ANKRD28,ANKRD31,ANKRD36C,ANKS1A,ANO2,ANTXR2,ANXA9,AOC2,AP1G1,AP4E1,APLP1,ARFGEF1,ARFGEF2,ARHGAP44,ARHGAP5,ARHGEF26,ARHGEF5,ARHGEF7,ARID2,ARMC5,ASAP1,A…	727
Cancer,Gastrointestinal Disease,Organismal Injury and Abnormalities	Digestive organ tumor	6.04e-41		-0.472	AAMDC,ABCC2,ABL2,ABLIM1,ABTB2,ACMSD,ACP3,ACTA2,ACTG2,ADAD2,ADAMTS16,ADAMTSL3,ADORA1,ADORA2A,ADRA1B,ADRB1,AGA,AGAP1,AGAP5 (includes others),AGBL3,AGFG2,AGL,AGTPBP1,AHCTF1,AIM2,AJUBA,AKAP13,AKR1B10,AKR1B15,ALDH1A3,ALG1L,ALOX12B,AMH,AMPD3,ANAPC1,ANAPC2,ANGPTL4,ANKHD1/ANKHD1-EIF4EBP3,ANKRD13B,ANKRD17,ANKRD18B,ANKRD22,ANKRD23,ANKRD28,ANKRD31,ANKRD33B,ANKRD34A,ANKRD36C,ANKS1A,ANO2,ANTXR2,ANXA9,AOC2,AP1…	909
Cancer,Organismal Injury and Abnormalities	Frequency of tumor	1.97e-40		-0.038	ABCC2,ABHD12B,ABL2,ACMSD,ACP3,ACTA2,ADAMTS16,ADAMTSL3,ADORA1,ADORA2A,ADRA1B,AGAP5 (includes others),AGFG2,AGL,AGTPBP1,AHCTF1,AIM2,AJUBA,AKAP13,AKR1B10,AKR1B15,ALDH1A3,ALOX12B,AMH,ANAPC1,ANAPC2,ANGPTL4,ANKHD1/ANKHD1-EIF4EBP3,ANKRD13B,ANKRD22,ANKRD23,ANKRD28,ANKRD31,ANKRD36C,ANKS1A,ANO2,ANTXR2,ANXA9,AOC2,AP1G1,AP4E1,APLP1,ARFGEF1,ARFGEF2,ARHGAP44,ARHGAP5,ARHGEF26,ARHGEF5,ARHGEF7,ARID2,ARMC5,ASAP1,A…	733
Cancer,Gastrointestinal Disease,Organismal Injury and Abnormalities	Digestive system cancer	3.87e-40		-0.983	AAMDC,ABCC2,ABL2,ABLIM1,ABTB2,ACMSD,ACP3,ACTA2,ACTG2,ADAD2,ADAMTS16,ADAMTSL3,ADORA1,ADORA2A,ADRA1B,ADRB1,AGA,AGAP1,AGAP5 (includes others),AGBL3,AGFG2,AGL,AGTPBP1,AHCTF1,AIM2,AJUBA,AKAP13,AKR1B10,AKR1B15,ALDH1A3,ALOX12B,AMH,AMPD3,ANAPC1,ANAPC2,ANGPTL4,ANKHD1/ANKHD1-EIF4EBP3,ANKRD13B,ANKRD17,ANKRD18B,ANKRD22,ANKRD23,ANKRD28,ANKRD31,ANKRD33B,ANKRD34A,ANKRD36C,ANKS1A,ANO2,ANTXR2,ANXA9,AOC2,AP1G1,AP4…	895
Cancer,Organismal Injury and Abnormalities	Development of carcinoma	3.21e-39		0.245	ABCC2,ABHD12B,ABL2,ACMSD,ACP3,ACTA2,ADAMTS16,ADAMTSL3,ADORA1,ADORA2A,ADRA1B,AGAP5 (includes others),AGFG2,AGL,AGTPBP1,AHCTF1,AIM2,AJUBA,AKAP13,AKR1B10,AKR1B15,ALDH1A3,ALOX12B,AMH,ANAPC1,ANAPC2,ANGPTL4,ANKHD1/ANKHD1-EIF4EBP3,ANKRD13B,ANKRD22,ANKRD23,ANKRD28,ANKRD31,ANKRD36C,ANKS1A,ANO2,ANTXR2,ANXA9,AOC2,AP1G1,AP4E1,APLP1,ARFGEF1,ARFGEF2,ARHGAP44,ARHGAP5,ARHGEF26,ARHGEF5,ARHGEF7,ARID2,ARMC5,ASAP1,A…	715
Cancer,Organismal Injury and Abnormalities	Malignant genitourinary solid tumor	1.12e-38		0.319	ABCC2,ABHD12B,ABL2,ABLIM1,ACP3,ACTA2,ACTG2,ADAMTS16,ADAMTSL3,ADORA1,ADORA2A,ADRA1B,ADRB1,AGAP5 (includes others),AGBL3,AGFG2,AGL,AGTPBP1,AHCTF1,AIM2,AJUBA,AKAP13,ALDH1A3,ALOX12B,AMPD3,ANAPC1,ANAPC2,ANKHD1/ANKHD1-EIF4EBP3,ANKRD13B,ANKRD17,ANKRD18B,ANKRD28,ANKRD31,ANKRD34A,ANKRD36C,ANKS1A,ANO2,ANTXR2,ANXA9,AOC2,AP1G1,AP4E1,ARFGEF1,ARFGEF2,ARHGAP42,ARHGAP44,ARHGAP45,ARHGAP5,ARHGAP8/PRR5-ARHGAP8,ARHG…	721
Cancer,Organismal Injury and Abnormalities	Melanoma	1.18e-38		-0.048	AAMDC,ABCC2,ABHD12B,ABL2,ABTB2,ACMSD,ACOT6,ACP3,ADAD2,ADAMTS16,ADAMTSL3,ADORA1,ADORA2A,ADRA1B,AGA,AGAP5 (includes others),AGBL3,AGL,AGTPBP1,AHCTF1,AKAP13,AKR1B10,ALOX12B,AMH,AMPD3,ANAPC1,ANAPC2,ANKHD1/ANKHD1-EIF4EBP3,ANKRD17,ANKRD22,ANKRD23,ANKRD28,ANKRD31,ANKRD33B,ANKRD34A,ANKS1A,ANO2,ANTXR2,ANXA9,AOC2,AP1G1,APLP1,APOL6,ARFGEF1,ARFGEF2,ARHGAP42,ARHGAP44,ARHGAP5,ARHGAP8/PRR5-ARHGAP8,ARHGEF5,ARHGE…	706
Cancer,Organismal Injury and Abnormalities	Tumorigenesis of epithelial neoplasm	1.48e-38		0.237	ABCC2,ABHD12B,ABL2,ACMSD,ACP3,ACTA2,ADAMTS16,ADAMTSL3,ADORA1,ADORA2A,ADRA1B,AGAP5 (includes others),AGFG2,AGL,AGTPBP1,AHCTF1,AIM2,AJUBA,AKAP13,AKR1B10,AKR1B15,ALDH1A3,ALOX12B,AMH,ANAPC1,ANAPC2,ANGPTL4,ANKHD1/ANKHD1-EIF4EBP3,ANKRD13B,ANKRD22,ANKRD23,ANKRD28,ANKRD31,ANKRD36C,ANKS1A,ANO2,ANTXR2,ANXA9,AOC2,AP1G1,AP4E1,APLP1,ARFGEF1,ARFGEF2,ARHGAP44,ARHGAP5,ARHGEF26,ARHGEF5,ARHGEF7,ARID2,ARMC5,ASAP1,A…	720
Cancer,Organismal Injury and Abnormalities	Genitourinary tumor	2.28e-38		0.488	ABCC2,ABHD12B,ABL2,ABLIM1,ACP3,ACTA2,ACTG2,ADAMTS16,ADAMTSL3,ADORA1,ADORA2A,ADRA1B,ADRB1,AGAP5 (includes others),AGBL3,AGFG2,AGL,AGTPBP1,AHCTF1,AIM2,AJUBA,AKAP13,ALDH1A3,ALOX12B,AMH,AMPD3,ANAPC1,ANAPC2,ANKHD1/ANKHD1-EIF4EBP3,ANKRD13B,ANKRD17,ANKRD18B,ANKRD28,ANKRD31,ANKRD34A,ANKRD36C,ANKS1A,ANO2,ANTXR2,ANXA9,AOC2,AP1G1,AP4E1,ARFGEF1,ARFGEF2,ARHGAP42,ARHGAP44,ARHGAP45,ARHGAP5,ARHGAP8/PRR5-ARHGAP8,…	730
Cancer,Organismal Injury and Abnormalities	Genitourinary carcinoma	1.71e-36		0.181	ABCC2,ABHD12B,ABL2,ACP3,ACTA2,ACTG2,ADAMTS16,ADAMTSL3,ADORA1,ADORA2A,ADRA1B,ADRB1,AGAP5 (includes others),AGBL3,AGFG2,AGL,AGTPBP1,AHCTF1,AJUBA,AKAP13,ALOX12B,AMPD3,ANAPC1,ANAPC2,ANKHD1/ANKHD1-EIF4EBP3,ANKRD13B,ANKRD17,ANKRD28,ANKRD31,ANKRD34A,ANKRD36C,ANKS1A,ANO2,ANTXR2,ANXA9,AOC2,AP1G1,AP4E1,ARFGEF1,ARFGEF2,ARHGAP42,ARHGAP44,ARHGAP5,ARHGEF26,ARHGEF5,ARHGEF7,ARID2,ASAP1,ATG2A,ATP13A3,ATR,ATRNL1,A…	650
Cancer,Organismal Injury and Abnormalities	Pelvic cancer	6.99e-36		0.385	ABCC2,ABHD12B,ABL2,ACP3,ACTG2,ADAMTS16,ADAMTSL3,ADORA1,ADORA2A,ADRA1B,ADRB1,AGAP5 (includes others),AGBL3,AGFG2,AGL,AGTPBP1,AHCTF1,AJUBA,AKAP13,ALOX12B,AMPD3,ANAPC1,ANAPC2,ANKHD1/ANKHD1-EIF4EBP3,ANKRD13B,ANKRD17,ANKRD28,ANKRD31,ANKRD34A,ANKRD36C,ANKS1A,ANO2,ANTXR2,ANXA9,AOC2,AP1G1,AP4E1,ARFGEF1,ARFGEF2,ARHGAP42,ARHGAP44,ARHGAP5,ARHGEF26,ARHGEF5,ARID2,ARMC5,ASAP1,ATF3,ATG2A,ATP13A3,ATR,ATRNL1,ATXN…	653
Dermatological Diseases and Conditions,Organismal Injury and Abnormalities	Skin lesion	7.96e-36		-0.138	ABCC2,ABHD12B,ABL2,ABTB2,ACMSD,ACOT6,ACP3,ADAD2,ADAMTS16,ADAMTSL3,ADORA1,ADORA2A,ADRA1B,ADRB1,AGA,AGBL3,AGL,AGTPBP1,AHCTF1,AIM2,AKAP13,AKR1B10,ALOX12B,AMH,AMPD3,ANAPC1,ANGPTL4,ANKHD1/ANKHD1-EIF4EBP3,ANKRD17,ANKRD22,ANKRD23,ANKRD28,ANKRD31,ANKRD33B,ANKRD36C,ANKS1A,ANO2,ANTXR2,ANXA9,AP1G1,APLP1,APOL6,ARFGEF1,ARFGEF2,ARHGAP42,ARHGAP44,ARHGAP5,ARHGAP8/PRR5-ARHGAP8,ARHGEF5,ARID2,ARRDC4,ASAP1,ASB5,ATF3…	652
Cancer,Organismal Injury and Abnormalities	Pelvic tumor	2.92e-35		0.453	ABCC2,ABHD12B,ABL2,ACP3,ACTG2,ADAMTS16,ADAMTSL3,ADORA1,ADORA2A,ADRA1B,ADRB1,AGAP5 (includes others),AGBL3,AGFG2,AGL,AGTPBP1,AHCTF1,AJUBA,AKAP13,ALOX12B,AMPD3,ANAPC1,ANAPC2,ANKHD1/ANKHD1-EIF4EBP3,ANKRD13B,ANKRD17,ANKRD28,ANKRD31,ANKRD34A,ANKRD36C,ANKS1A,ANO2,ANTXR2,ANXA9,AOC2,AP1G1,AP4E1,ARFGEF1,ARFGEF2,ARHGAP42,ARHGAP44,ARHGAP5,ARHGEF26,ARHGEF5,ARID2,ARMC5,ASAP1,ASB5,ATF3,ATG2A,ATP13A3,ATR,ATRNL1…	659
Cancer,Organismal Injury and Abnormalities	Anogenital cancer	6.03e-35		-0.541	ABCC2,ABHD12B,ABL2,ABLIM1,ACP3,ACTA2,ACTG2,ADAMTS16,ADAMTSL3,ADORA1,ADORA2A,ADRA1B,ADRB1,AGAP5 (includes others),AGBL3,AGL,AGTPBP1,AHCTF1,AIM2,AJUBA,AKAP13,ALDH1A3,ALOX12B,AMPD3,ANAPC1,ANAPC2,ANKHD1/ANKHD1-EIF4EBP3,ANKRD13B,ANKRD17,ANKRD18B,ANKRD28,ANKRD31,ANKRD36C,ANKS1A,ANO2,ANTXR2,ANXA9,AOC2,AP1G1,AP4E1,ARFGEF1,ARFGEF2,ARHGAP42,ARHGAP44,ARHGAP45,ARHGAP5,ARHGAP8/PRR5-ARHGAP8,ARHGEF26,ARHGEF5,AR…	673
Cancer,Dermatological Diseases and Conditions,Organismal Injury and Abnormalities	Skin tumor	9.84e-35		-1.055	ABCC2,ABHD12B,ABL2,ABTB2,ACMSD,ACOT6,ACP3,ADAD2,ADAMTS16,ADAMTSL3,ADORA1,ADORA2A,AGA,AGBL3,AGL,AGTPBP1,AHCTF1,AIM2,AKAP13,AKR1B10,ALOX12B,AMH,AMPD3,ANAPC1,ANGPTL4,ANKHD1/ANKHD1-EIF4EBP3,ANKRD17,ANKRD22,ANKRD23,ANKRD28,ANKRD31,ANKRD33B,ANKRD36C,ANKS1A,ANO2,ANTXR2,ANXA9,AP1G1,APLP1,APOL6,ARFGEF1,ARFGEF2,ARHGAP42,ARHGAP44,ARHGAP5,ARHGAP8/PRR5-ARHGAP8,ARHGEF5,ARID2,ARRDC4,ASAP1,ASB5,ATF3,ATG2A,ATP13A…	645
Cancer,Dermatological Diseases and Conditions,Organismal Injury and Abnormalities	Skin cancer	1.33e-34		-0.193	ABCC2,ABHD12B,ABL2,ABTB2,ACMSD,ACOT6,ACP3,ADAD2,ADAMTS16,ADAMTSL3,ADORA1,ADORA2A,AGA,AGBL3,AGL,AGTPBP1,AHCTF1,AIM2,AKAP13,AKR1B10,ALOX12B,AMH,AMPD3,ANAPC1,ANKHD1/ANKHD1-EIF4EBP3,ANKRD17,ANKRD22,ANKRD23,ANKRD28,ANKRD31,ANKRD33B,ANKRD36C,ANKS1A,ANO2,ANTXR2,ANXA9,AP1G1,APLP1,APOL6,ARFGEF1,ARFGEF2,ARHGAP42,ARHGAP44,ARHGAP5,ARHGAP8/PRR5-ARHGAP8,ARHGEF5,ARID2,ARRDC4,ASAP1,ASB5,ATF3,ATG2A,ATP13A3,ATR,AT…	642
Cancer,Organismal Injury and Abnormalities	Malignant solid organ tumor	4.11e-34		-0.442	ABCC2,ABHD12B,ABL2,ABTB2,ACMSD,ACOT6,ACP3,ADAD2,ADAMTS16,ADAMTSL3,ADORA1,ADORA2A,AGA,AGBL3,AGL,AGTPBP1,AHCTF1,AIM2,AKAP13,AKR1B10,ALDH1A3,ALOX12B,AMH,AMPD3,ANAPC1,ANKHD1/ANKHD1-EIF4EBP3,ANKRD17,ANKRD22,ANKRD23,ANKRD28,ANKRD31,ANKRD33B,ANKRD36C,ANKS1A,ANO2,ANTXR2,ANXA9,AP1G1,APLP1,APOL6,ARFGEF1,ARFGEF2,ARHGAP42,ARHGAP44,ARHGAP5,ARHGAP8/PRR5-ARHGAP8,ARHGEF5,ARID2,ARRDC4,ASAP1,ASB5,ATF3,ATG2A,ATP13A…	649
Cancer,Organismal Injury and Abnormalities,Reproductive System Disease	Breast or gynecological cancer	2.64e-33		-0.173	ABCC2,ABHD12B,ABL2,ABLIM1,ACP3,ACTA2,ACTG2,ADAMTS16,ADAMTSL3,ADORA1,ADORA2A,ADRA1B,ADRB1,AGAP5 (includes others),AGL,AGTPBP1,AHCTF1,AIM2,AJUBA,AKAP13,ALDH1A3,ALOX12B,ANAPC2,ANKRD18B,ANKRD28,ANKRD31,ANKRD36C,ANKS1A,ANO2,ANTXR2,ANXA9,AOC2,AP1G1,AP4E1,ARFGEF1,ARFGEF2,ARHGAP44,ARHGAP45,ARHGAP8/PRR5-ARHGAP8,ARHGEF26,ARHGEF5,ARHGEF7,ARID2,ASAP1,ATF3,ATG2A,ATR,AXIN1,AZGP1,B2M,B3GALT5,BACH1,BCLAF1,BCR,BI…	557
Cancer,Organismal Injury and Abnormalities	Genitourinary adenocarcinoma	4.55e-33		-0.46	ABCC2,ABHD12B,ABL2,ACP3,ACTA2,ACTG2,ADAMTS16,ADAMTSL3,ADORA1,ADORA2A,ADRA1B,ADRB1,AGAP5 (includes others),AGBL3,AGL,AGTPBP1,AHCTF1,AJUBA,AKAP13,AMPD3,ANAPC1,ANAPC2,ANKHD1/ANKHD1-EIF4EBP3,ANKRD13B,ANKRD17,ANKRD28,ANKRD31,ANKRD36C,ANKS1A,ANO2,ANXA9,AOC2,AP1G1,AP4E1,ARFGEF1,ARFGEF2,ARHGAP42,ARHGAP44,ARHGAP5,ARHGEF26,ARHGEF5,ARHGEF7,ARID2,ASAP1,ATG2A,ATP13A3,ATR,ATRNL1,ATXN1L,ATXN2L,AXIN1,AZGP1,B2M,B…	589
Cancer,Organismal Injury and Abnormalities	Pelvic adenocarcinoma	5.54e-32			ABCC2,ABHD12B,ABL2,ACP3,ACTG2,ADAMTS16,ADAMTSL3,ADORA1,ADORA2A,ADRA1B,ADRB1,AGAP5 (includes others),AGBL3,AGL,AGTPBP1,AHCTF1,AKAP13,AMPD3,ANAPC1,ANAPC2,ANKHD1/ANKHD1-EIF4EBP3,ANKRD13B,ANKRD17,ANKRD28,ANKRD31,ANKRD36C,ANKS1A,ANO2,ANXA9,AOC2,AP1G1,AP4E1,ARFGEF1,ARFGEF2,ARHGAP42,ARHGAP44,ARHGAP5,ARHGEF26,ARHGEF5,ARID2,ASAP1,ATG2A,ATR,ATRNL1,ATXN1L,ATXN2L,AXIN1,AZGP1,B2M,B3GALT5,BAAT,BACH1,BCLAF1,BCR…	545
Cancer,Organismal Injury and Abnormalities	Neoplasia of cells	1.06e-31		-1.738	ABCC2,ABHD12B,ABL2,ABLIM1,ABTB2,ACTA2,ADAD2,ADAMTS16,ADAMTSL3,ADORA1,ADORA2A,ADRA1B,ADRB1,AGAP5 (includes others),AGL,AHCTF1,AIM2,AJUBA,AKAP13,ALDH1A3,ALOX12B,ANAPC1,ANGPTL4,ANKHD1/ANKHD1-EIF4EBP3,ANKRD17,ANKRD18B,ANKRD22,ANKRD33B,ANKRD36C,ANO2,ANTXR2,AOC2,AP1G1,APLP1,ARHGAP42,ARHGAP5,ARHGEF5,ARID2,ARMC5,ASAP1,ASB5,ATF3,ATG2A,ATP13A3,ATR,ATRNL1,ATXN2L,AXIN1,AZIN1,B2M,B3GALT5,BAAT,BACH1,BCLAF1,BCR…	554
Cancer,Organismal Injury and Abnormalities,Reproductive System Disease	Genital tumor	1.27e-31		0.728	ABCC2,ABHD12B,ABL2,ACP3,ACTG2,ADAMTS16,ADAMTSL3,ADORA1,ADORA2A,ADRA1B,ADRB1,AGAP5 (includes others),AGBL3,AGL,AGTPBP1,AHCTF1,AKAP13,ALOX12B,AMH,AMPD3,ANAPC1,ANAPC2,ANKHD1/ANKHD1-EIF4EBP3,ANKRD13B,ANKRD17,ANKRD28,ANKRD31,ANKRD36C,ANKS1A,ANO2,ANTXR2,ANXA9,AOC2,AP1G1,AP4E1,ARFGEF1,ARFGEF2,ARHGAP42,ARHGAP44,ARHGAP5,ARHGEF26,ARHGEF5,ARID2,ASAP1,ASB5,ATF3,ATG2A,ATR,ATRNL1,ATXN1L,ATXN2L,AXIN1,AZGP1,B2M,…	618
Cancer,Organismal Injury and Abnormalities	Breast or colorectal cancer	1.36e-31		0.302	ABCC2,ABL2,ABLIM1,ACMSD,ACP3,ACTA2,ADAMTS16,ADORA1,ADORA2A,ADRA1B,ADRB1,AGAP5 (includes others),AGL,AGTPBP1,AIM2,AJUBA,AKAP13,AKR1B10,ALDH1A3,ALOX12B,AMH,ANAPC1,ANAPC2,ANGPTL4,ANKHD1/ANKHD1-EIF4EBP3,ANKRD18B,ANKRD22,ANKRD23,ANKRD28,ANKRD31,ANKS1A,ANTXR2,ANXA9,AOC2,APLP1,ARFGEF1,ARHGAP44,ARHGAP45,ARHGAP5,ARHGAP8/PRR5-ARHGAP8,ARHGEF26,ARHGEF5,ARHGEF7,ARID2,ARMC5,ATF3,ATG2A,ATP13A3,ATR,ATRNL1,ATXN2L…	601
Cancer,Organismal Injury and Abnormalities,Reproductive System Disease	Genital tract cancer	2.35e-31		0.376	ABCC2,ABHD12B,ABL2,ACP3,ACTG2,ADAMTS16,ADAMTSL3,ADORA1,ADORA2A,ADRA1B,ADRB1,AGAP5 (includes others),AGBL3,AGL,AGTPBP1,AHCTF1,AKAP13,ALOX12B,AMPD3,ANAPC1,ANAPC2,ANKHD1/ANKHD1-EIF4EBP3,ANKRD13B,ANKRD17,ANKRD28,ANKRD31,ANKRD36C,ANKS1A,ANO2,ANTXR2,ANXA9,AOC2,AP1G1,AP4E1,ARFGEF1,ARFGEF2,ARHGAP42,ARHGAP44,ARHGAP5,ARHGEF26,ARHGEF5,ARID2,ASAP1,ATF3,ATG2A,ATR,ATRNL1,ATXN1L,ATXN2L,AXIN1,AZGP1,B2M,B3GALT5,B…	609
Cancer,Organismal Injury and Abnormalities	Cancer of cells	9.48e-31		-1.431	ABL2,ABLIM1,ABTB2,ACTA2,ADAD2,ADAMTS16,ADAMTSL3,ADORA1,ADORA2A,ADRA1B,ADRB1,AGAP5 (includes others),AGL,AHCTF1,AIM2,AJUBA,ALOX12B,ANGPTL4,ANKRD17,ANKRD18B,ANKRD33B,ANKRD36C,ANTXR2,AOC2,AP1G1,ARHGAP42,ARHGAP5,ARID2,ARMC5,ASAP1,ASB5,ATF3,ATG2A,ATP13A3,ATR,ATRNL1,ATXN2L,AXIN1,AZIN1,B2M,B3GALT5,BAAT,BACH1,BCLAF1,BCR,BEND3,BICC1,BIRC3,BPTF,BRCA1,BRPF1,BRPF3,BST2,BTBD7,C2CD4D,CAD,CAMK2N1,CAMSAP1,CAMSAP…	484
Cancer,Gastrointestinal Disease,Organismal Injury and Abnormalities	Colon tumor	1.36e-29	Increased	2.2	ABL2,ACMSD,ACP3,ADAMTS16,ADORA1,ADORA2A,ADRA1B,AGAP5 (includes others),AGL,AIM2,AKAP13,AKR1B10,ALDH1A3,AMH,ANAPC1,ANAPC2,ANGPTL4,ANKHD1/ANKHD1-EIF4EBP3,ANKRD22,ANKRD23,ANKRD28,ANKS1A,ANTXR2,AOC2,APLP1,ARHGAP44,ARHGAP5,ARHGEF26,ARHGEF7,ARID2,ARMC5,ATF3,ATG2A,ATP13A3,ATR,ATRNL1,ATXN2L,AXIN1,B2M,BAAT,BCO2,BCR,BEND3,BRCA1,BRF1,BST2,BTBD7,C1orf116,CAD,CAMK2N1,CAMSAP1,CAMSAP2,CASD1,CBX6,CCDC40,CCNB1IP1…	477
Cancer,Gastrointestinal Disease,Organismal Injury and Abnormalities	Colon cancer	1.37e-29		1.982	ABL2,ACMSD,ACP3,ADAMTS16,ADORA1,ADORA2A,ADRA1B,AGAP5 (includes others),AGL,AIM2,AKAP13,AKR1B10,ALDH1A3,AMH,ANAPC1,ANAPC2,ANGPTL4,ANKHD1/ANKHD1-EIF4EBP3,ANKRD22,ANKRD23,ANKRD28,ANKS1A,ANTXR2,AOC2,APLP1,ARHGAP44,ARHGAP5,ARHGEF26,ARHGEF7,ARID2,ARMC5,ATF3,ATG2A,ATP13A3,ATR,ATRNL1,ATXN2L,AXIN1,B2M,BAAT,BCO2,BCR,BEND3,BRCA1,BST2,BTBD7,C1orf116,CAD,CAMK2N1,CAMSAP1,CAMSAP2,CASD1,CBX6,CCDC40,CCNB1IP1,CDC6…	473
Cancer,Organismal Injury and Abnormalities	Development of adenocarcinoma	2.61e-29		0.812	ABCC2,ABHD12B,ABL2,ACP3,ACTA2,ADAMTS16,ADAMTSL3,ADORA1,ADORA2A,ADRA1B,AGAP5 (includes others),AGFG2,AGL,AGTPBP1,AHCTF1,AJUBA,AKR1B15,ALDH1A3,ANAPC1,ANAPC2,ANKHD1/ANKHD1-EIF4EBP3,ANKRD13B,ANKRD28,ANKRD31,ANKRD36C,ANKS1A,ANO2,ANXA9,AOC2,AP1G1,AP4E1,ARFGEF1,ARFGEF2,ARHGAP44,ARHGAP5,ARHGEF26,ARHGEF5,ARHGEF7,ARID2,ASAP1,ATP13A3,ATR,ATRNL1,ATXN2L,AXIN1,AZGP1,AZIN1,B2M,B3GALT5,B3GNT6,BACH1,BCLAF1,BCR,BI…	499
Cancer,Dermatological Diseases and Conditions,Organismal Injury and Abnormalities	Cutaneous melanoma	1.33e-28			ABCC2,ABHD12B,ABL2,ABTB2,ACMSD,ACOT6,ACP3,ADAD2,ADAMTS16,ADAMTSL3,ADORA1,ADORA2A,AGA,AGBL3,AGL,AGTPBP1,AHCTF1,AKAP13,AKR1B10,ALOX12B,AMH,AMPD3,ANAPC1,ANKHD1/ANKHD1-EIF4EBP3,ANKRD17,ANKRD22,ANKRD23,ANKRD28,ANKRD31,ANKRD33B,ANKS1A,ANO2,ANTXR2,ANXA9,AP1G1,APLP1,APOL6,ARFGEF1,ARFGEF2,ARHGAP42,ARHGAP44,ARHGAP5,ARHGAP8/PRR5-ARHGAP8,ARHGEF5,ARID2,ARRDC4,ASAP1,ASB5,ATF3,ATG2A,ATP13A3,ATR,ATRNL1,ATXN2L,AX…	600
Cancer,Organismal Injury and Abnormalities,Reproductive System Disease	Development of genital tumor	2.36e-28		0.294	ABCC2,ABHD12B,ACP3,ACTG2,ADAMTS16,ADAMTSL3,ADORA1,ADORA2A,ADRA1B,ADRB1,AGAP5 (includes others),AGL,AGTPBP1,AHCTF1,ALOX12B,AMH,ANAPC2,ANKRD28,ANKRD31,ANKRD36C,ANKS1A,ANO2,ANTXR2,AOC2,AP1G1,AP4E1,ARFGEF1,ARFGEF2,ARHGAP44,ARHGEF26,ARHGEF5,ARID2,ASAP1,ASB5,ATR,ATRNL1,AXIN1,AZGP1,B2M,B3GALT5,BACH1,BCLAF1,BCR,BICC1,BRCA1,BRF1,BRPF3,CABLES1,CAD,CAMSAP1,CARD16,CASD1,CCDC30,CCDC40,CCNT1,CD48,CD68,CDC25A,C…	453
Cancer,Gastrointestinal Disease,Organismal Injury and Abnormalities	Colon adenocarcinoma	2.39e-28			ABL2,ACMSD,ACP3,ADAMTS16,ADORA1,ADORA2A,ADRA1B,AGAP5 (includes others),AGL,AIM2,AKAP13,AKR1B10,ALDH1A3,AMH,ANAPC1,ANAPC2,ANGPTL4,ANKHD1/ANKHD1-EIF4EBP3,ANKRD22,ANKRD23,ANKRD28,ANKS1A,ANTXR2,AOC2,APLP1,ARHGAP44,ARHGAP5,ARHGEF26,ARHGEF7,ARID2,ARMC5,ATG2A,ATP13A3,ATR,ATRNL1,ATXN2L,AXIN1,B2M,BAAT,BCO2,BCR,BEND3,BRCA1,BTBD7,C1orf116,CAD,CAMK2N1,CAMSAP1,CAMSAP2,CASD1,CBX6,CCDC40,CCNB1IP1,CDC6,CDH8,CDV3…	448
Cancer,Organismal Injury and Abnormalities,Reproductive System Disease	Tumorigenesis of reproductive tract	3.06e-28		1.183	ABCC2,ABHD12B,ACP3,ACTG2,ADAMTS16,ADAMTSL3,ADORA1,ADORA2A,ADRA1B,ADRB1,AGAP5 (includes others),AGL,AGTPBP1,AHCTF1,ALOX12B,ANAPC2,ANKRD28,ANKRD31,ANKRD36C,ANKS1A,ANO2,ANTXR2,AOC2,AP1G1,AP4E1,ARFGEF1,ARFGEF2,ARHGAP44,ARHGEF26,ARHGEF5,ARID2,ASAP1,ASB5,ATR,ATRNL1,AXIN1,AZGP1,B2M,B3GALT5,BACH1,BCLAF1,BCR,BICC1,BRCA1,BRF1,BRPF3,CABLES1,CAD,CAMSAP1,CARD16,CASD1,CCDC30,CCDC40,CCNT1,CD48,CD68,CDC25A,CDC6,…	465
Cancer,Organismal Injury and Abnormalities,Reproductive System Disease	Female genital neoplasm	4.96e-28		1.183	ABCC2,ABHD12B,ACP3,ACTG2,ADAMTS16,ADAMTSL3,ADORA1,ADORA2A,ADRA1B,ADRB1,AGAP5 (includes others),AGL,AGTPBP1,AHCTF1,ALOX12B,ANAPC2,ANKRD28,ANKRD31,ANKRD36C,ANKS1A,ANO2,ANTXR2,AOC2,AP1G1,AP4E1,ARFGEF1,ARFGEF2,ARHGAP44,ARHGEF26,ARHGEF5,ARID2,ASAP1,ASB5,ATR,ATRNL1,AXIN1,AZGP1,B2M,B3GALT5,BACH1,BCLAF1,BCR,BICC1,BRCA1,BRF1,BRPF3,CABLES1,CAD,CAMSAP1,CARD16,CASD1,CCDC30,CCDC40,CCNT1,CD48,CD68,CDC25A,CDC6,…	465
Cancer,Gastrointestinal Disease,Organismal Injury and Abnormalities	Colon carcinoma	4.17e-27			ABL2,ACMSD,ACP3,ADAMTS16,ADORA1,ADORA2A,ADRA1B,AGAP5 (includes others),AGL,AIM2,AKAP13,AKR1B10,ALDH1A3,AMH,ANAPC1,ANAPC2,ANGPTL4,ANKHD1/ANKHD1-EIF4EBP3,ANKRD22,ANKRD23,ANKRD28,ANKS1A,ANTXR2,AOC2,APLP1,ARHGAP44,ARHGAP5,ARHGEF26,ARHGEF7,ARID2,ARMC5,ATG2A,ATP13A3,ATR,ATRNL1,ATXN2L,AXIN1,B2M,BAAT,BCO2,BCR,BEND3,BRCA1,BTBD7,C1orf116,CAD,CAMK2N1,CAMSAP1,CAMSAP2,CASD1,CBX6,CCDC40,CCNB1IP1,CDC6,CDH8,CDV3…	449
Cancer,Organismal Injury and Abnormalities,Reproductive System Disease	Female genital tract cancer	6.01e-27		1.067	ABCC2,ABHD12B,ACP3,ACTG2,ADAMTS16,ADAMTSL3,ADORA1,ADORA2A,AGAP5 (includes others),AGL,AGTPBP1,AHCTF1,ALOX12B,ANAPC2,ANKRD28,ANKRD31,ANKRD36C,ANKS1A,ANO2,ANTXR2,AOC2,AP1G1,AP4E1,ARFGEF1,ARFGEF2,ARHGAP44,ARHGEF26,ARHGEF5,ARID2,ASAP1,ATR,AXIN1,AZGP1,B2M,B3GALT5,BACH1,BCLAF1,BCR,BICC1,BRCA1,BRPF3,CABLES1,CAD,CAMSAP1,CARD16,CASD1,CCDC30,CCDC40,CCNT1,CD48,CD68,CDC25A,CDC6,CDH8,CELSR3,CEP120,CEP152,CEP2…	450
Cancer,Organismal Injury and Abnormalities,Reproductive System Disease	Female genital tract adenocarcinoma	1.08e-26			ABCC2,ABHD12B,ACP3,ACTG2,ADAMTS16,ADAMTSL3,ADORA1,ADORA2A,AGAP5 (includes others),AGL,AGTPBP1,AHCTF1,ANAPC2,ANKRD28,ANKRD31,ANKRD36C,ANKS1A,ANO2,AOC2,AP1G1,AP4E1,ARFGEF1,ARFGEF2,ARHGAP44,ARHGEF26,ARHGEF5,ARID2,ASAP1,ATR,AXIN1,AZGP1,B2M,B3GALT5,BACH1,BCLAF1,BCR,BICC1,BRCA1,BRPF3,CAD,CAMSAP1,CARD16,CASD1,CCDC30,CD68,CDC25A,CDC6,CDH8,CELSR3,CEP120,CEP152,CEP295,CEP44,CFTR,CGN,CIT,CLASP1,CLDN3,CLDN7,…	393
Cancer,Gastrointestinal Disease,Organismal Injury and Abnormalities	Colorectal adenocarcinoma	2.81e-26			ABL2,ACMSD,ACP3,ADAMTS16,ADORA1,ADORA2A,ADRA1B,AGAP5 (includes others),AGL,AIM2,AKAP13,AKR1B10,ALDH1A3,AMH,ANAPC1,ANAPC2,ANGPTL4,ANKHD1/ANKHD1-EIF4EBP3,ANKRD22,ANKRD23,ANKRD28,ANKS1A,ANTXR2,AOC2,APLP1,ARHGAP44,ARHGAP5,ARHGEF26,ARHGEF7,ARID2,ARMC5,ATG2A,ATP13A3,ATR,ATRNL1,ATXN2L,AXIN1,B2M,B3GNT6,BAAT,BCO2,BCR,BEND3,BRCA1,BTBD7,C1orf116,CAD,CAMK2N1,CAMSAP1,CAMSAP2,CASD1,CBX6,CCDC40,CCNB1IP1,CDC6,CD…	454
Gastrointestinal Disease,Hepatic System Disease,Organismal Injury and Abnormalities	Liver lesion	3.1e-26		-0.101	ABCC2,ABL2,ABLIM1,ACP3,ACTA2,ACTG2,ADAD2,ADAMTS16,ADAMTSL3,ADORA1,ADORA2A,ADRB1,AGA,AGAP1,AGAP5 (includes others),AGFG2,AGTPBP1,AHCTF1,AKAP13,AKR1B10,AKR1B15,ALDH1A3,ALG1L,ALOX12B,AMH,AMPD3,ANAPC1,ANAPC2,ANKHD1/ANKHD1-EIF4EBP3,ANKRD17,ANKRD18B,ANKRD36C,ANKS1A,ANO2,ANTXR2,ANXA9,AP1G1,AP4E1,APLP1,ARFGEF1,ARFGEF2,ARHGAP42,ARHGAP44,ARHGAP5,ARHGAP8/PRR5-ARHGAP8,ARHGEF26,ARHGEF7,ARID2,ARMC5,ARRDC4,ATP1…	534
Cancer,Gastrointestinal Disease,Organismal Injury and Abnormalities	Colorectal carcinoma	3.14e-26			ABL2,ACMSD,ACP3,ADAMTS16,ADORA1,ADORA2A,ADRA1B,AGAP5 (includes others),AGL,AIM2,AKAP13,AKR1B10,ALDH1A3,AMH,ANAPC1,ANAPC2,ANGPTL4,ANKHD1/ANKHD1-EIF4EBP3,ANKRD22,ANKRD23,ANKRD28,ANKS1A,ANTXR2,AOC2,APLP1,ARHGAP44,ARHGAP5,ARHGEF26,ARHGEF7,ARID2,ARMC5,ATG2A,ATP13A3,ATR,ATRNL1,ATXN2L,AXIN1,B2M,B3GNT6,BAAT,BCO2,BCR,BEND3,BRCA1,BTBD7,C1orf116,CAD,CAMK2N1,CAMSAP1,CAMSAP2,CASD1,CBX6,CCDC40,CCNB1IP1,CDC6,CD…	463
Cancer,Gastrointestinal Disease,Organismal Injury and Abnormalities	Development of digestive organ tumor	1.08e-25		0.551	ABL2,ACMSD,ACP3,ADAMTS16,ADORA1,ADORA2A,ADRA1B,AGAP5 (includes others),AGL,AIM2,AKAP13,AKR1B10,ALDH1A3,AMH,ANAPC1,ANAPC2,ANGPTL4,ANKHD1/ANKHD1-EIF4EBP3,ANKRD22,ANKRD23,ANKRD28,ANKS1A,ANTXR2,AOC2,APLP1,ARHGAP44,ARHGAP5,ARHGEF26,ARHGEF7,ARID2,ARMC5,ATG2A,ATP13A3,ATR,ATRNL1,ATXN2L,AXIN1,AZGP1,AZIN1,B2M,B3GNT6,BAAT,BCO2,BCR,BEND3,BRCA1,BRPF1,BTBD7,C1orf116,CAD,CAMK2N1,CAMSAP1,CAMSAP2,CASC3,CASD1,CBX6…	509
Cancer,Gastrointestinal Disease,Hepatic System Disease,Organismal Injury and Abnormalities	Liver tumor	5.1e-25		-0.599	ABCC2,ABL2,ABLIM1,ACP3,ACTG2,ADAD2,ADAMTS16,ADAMTSL3,ADRB1,AGAP1,AGAP5 (includes others),AGFG2,AGTPBP1,AHCTF1,AKAP13,AKR1B10,AKR1B15,ALDH1A3,ALG1L,ALOX12B,AMH,AMPD3,ANAPC1,ANAPC2,ANKHD1/ANKHD1-EIF4EBP3,ANKRD17,ANKRD18B,ANKRD36C,ANKS1A,ANO2,ANTXR2,ANXA9,AP1G1,AP4E1,APLP1,ARFGEF1,ARFGEF2,ARHGAP42,ARHGAP44,ARHGAP5,ARHGAP8/PRR5-ARHGAP8,ARHGEF26,ARHGEF7,ARID2,ARMC5,ARRDC4,ATP13A3,ATR,ATXN2L,AXIN1,B2M,…	515
Cancer,Gastrointestinal Disease,Hepatic System Disease,Organismal Injury and Abnormalities	Liver carcinoma	8.05e-25		-0.979	ABCC2,ABL2,ABLIM1,ACP3,ACTG2,ADAD2,ADAMTS16,ADAMTSL3,ADRB1,AGAP1,AGFG2,AGTPBP1,AHCTF1,AKAP13,AKR1B10,AKR1B15,ALDH1A3,ALOX12B,AMH,AMPD3,ANAPC2,ANKHD1/ANKHD1-EIF4EBP3,ANKRD17,ANKRD18B,ANO2,ANTXR2,ANXA9,AP1G1,AP4E1,ARFGEF1,ARFGEF2,ARHGAP44,ARHGAP5,ARHGAP8/PRR5-ARHGAP8,ARHGEF26,ARHGEF7,ARID2,ARMC5,ARRDC4,ATR,ATXN2L,AXIN1,B2M,BACH1,BCLAF1,BCO2,BCR,BICC1,BPTF,BRCA1,BRMS1L,BTBD7,CAD,CAMK2N1,CAMSAP1,CASD…	446
Cancer,Gastrointestinal Disease,Organismal Injury and Abnormalities	Hepatobiliary carcinoma	1.63e-24		-1.345	ABCC2,ABL2,ABLIM1,ACP3,ACTG2,ADAD2,ADAMTS16,ADAMTSL3,ADRB1,AGA,AGAP1,AGFG2,AGTPBP1,AHCTF1,AKAP13,AKR1B10,AKR1B15,ALDH1A3,ALOX12B,AMH,AMPD3,ANAPC2,ANKHD1/ANKHD1-EIF4EBP3,ANKRD17,ANKRD18B,ANO2,ANTXR2,ANXA9,AP1G1,AP4E1,ARFGEF1,ARFGEF2,ARHGAP44,ARHGAP5,ARHGAP8/PRR5-ARHGAP8,ARHGEF26,ARHGEF7,ARID2,ARMC5,ARRDC4,ATR,ATXN2L,AXIN1,B2M,BAAT,BACH1,BCLAF1,BCO2,BCR,BICC1,BPTF,BRCA1,BRMS1L,BTBD7,C15orf39,CAD,CA…	465
Cancer,Gastrointestinal Disease,Organismal Injury and Abnormalities	Colorectal cancer	1.59e-23		1.195	ABL2,ACMSD,ACP3,ACTA2,ADAMTS16,ADORA1,ADORA2A,ADRA1B,AGAP5 (includes others),AGL,AIM2,AJUBA,AKAP13,AKR1B10,ALDH1A3,AMH,ANAPC1,ANAPC2,ANGPTL4,ANKHD1/ANKHD1-EIF4EBP3,ANKRD22,ANKRD23,ANKRD28,ANKS1A,ANTXR2,AOC2,APLP1,ARHGAP44,ARHGAP5,ARHGEF26,ARHGEF7,ARID2,ARMC5,ATF3,ATG2A,ATP13A3,ATR,ATRNL1,ATXN2L,AXIN1,B2M,B3GNT6,BAAT,BCO2,BCR,BEND3,BRCA1,BST2,BTBD7,C1orf116,CAD,CAMK2N1,CAMSAP1,CAMSAP2,CASD1,CBX6,C…	504
Gastrointestinal Disease,Organismal Injury and Abnormalities	Colorectal disorder	2.05e-23		1.178	ABL2,ACMSD,ACP3,ACTA2,ADAMTS16,ADORA1,ADORA2A,ADRA1B,AGAP5 (includes others),AGL,AIM2,AJUBA,AKAP13,AKR1B10,ALDH1A3,AMH,ANAPC1,ANAPC2,ANGPTL4,ANKHD1/ANKHD1-EIF4EBP3,ANKRD22,ANKRD23,ANKRD28,ANKS1A,ANTXR2,AOC2,APLP1,ARHGAP44,ARHGAP5,ARHGEF26,ARHGEF7,ARID2,ARMC5,ATF3,ATG2A,ATP13A3,ATR,ATRNL1,ATXN2L,AXIN1,B2M,B3GNT6,BAAT,BCO2,BCR,BEND3,BRCA1,BRF1,BST2,BTBD7,C1orf116,CAD,CAMK2N1,CAMSAP1,CAMSAP2,CASD1,C…	522
Cancer,Gastrointestinal Disease,Hepatic System Disease,Organismal Injury and Abnormalities	Hepatobiliary system cancer	2.38e-23		-1.289	ABCC2,ABL2,ABLIM1,ACP3,ACTG2,ADAD2,ADAMTS16,ADAMTSL3,ADRB1,AGA,AGAP1,AGFG2,AGTPBP1,AHCTF1,AKAP13,AKR1B10,AKR1B15,ALDH1A3,ALOX12B,AMH,AMPD3,ANAPC2,ANKHD1/ANKHD1-EIF4EBP3,ANKRD17,ANKRD18B,ANO2,ANTXR2,ANXA9,AP1G1,AP4E1,ARFGEF1,ARFGEF2,ARHGAP44,ARHGAP5,ARHGAP8/PRR5-ARHGAP8,ARHGEF26,ARHGEF7,ARID2,ARMC5,ARRDC4,ATR,ATXN2L,AXIN1,B2M,BAAT,BACH1,BCLAF1,BCO2,BCR,BHMT2,BICC1,BPTF,BRCA1,BRMS1L,BTBD7,C15orf39,…	473
Cancer,Gastrointestinal Disease,Hepatic System Disease,Organismal Injury and Abnormalities	Liver cancer	3.09e-23		-1.013	ABCC2,ABL2,ABLIM1,ACP3,ACTG2,ADAD2,ADAMTS16,ADAMTSL3,ADRB1,AGAP1,AGFG2,AGTPBP1,AHCTF1,AKAP13,AKR1B10,AKR1B15,ALDH1A3,ALOX12B,AMH,AMPD3,ANAPC2,ANKHD1/ANKHD1-EIF4EBP3,ANKRD17,ANKRD18B,ANO2,ANTXR2,ANXA9,AP1G1,AP4E1,ARFGEF1,ARFGEF2,ARHGAP44,ARHGAP5,ARHGAP8/PRR5-ARHGAP8,ARHGEF26,ARHGEF7,ARID2,ARMC5,ARRDC4,ATR,ATXN2L,AXIN1,B2M,BACH1,BCLAF1,BCO2,BCR,BHMT2,BICC1,BPTF,BRCA1,BRMS1L,BTBD7,CAD,CAMK2N1,CAMSAP…	453
Cancer,Organismal Injury and Abnormalities	Head and neck squamous cell carcinoma	4.86e-23			ABL2,ABTB2,ACTA2,ADAD2,ADAMTSL3,ADORA1,AGAP5 (includes others),AJUBA,ALOX12B,ANKRD17,ANKRD18B,ANKRD33B,ANKRD36C,AP1G1,ARHGAP5,ARID2,ARMC5,ASAP1,ASB5,ATG2A,ATP13A3,ATR,ATRNL1,ATXN2L,AZIN1,B2M,BAAT,BCR,BICC1,BPTF,BRCA1,BRPF3,BTBD7,CAD,CAMSAP1,CAMSAP2,CASC3,CCNB1IP1,CD48,CDC6,CDH8,CELSR3,CEP250,CEP295,CEP350,CFTR,CHERP,CIPC,CLASP1,CNOT1,COL1A2,CPAMD8,CYP1A1,DCN,DDHD1,DDX10,DDX11,DDX47,DDX58,DGKD,DHX…	281
Cancer,Gastrointestinal Disease,Organismal Injury and Abnormalities	Colorectal tumor	5.07e-23		1.58	ABL2,ACMSD,ACP3,ACTA2,ADAMTS16,ADORA1,ADORA2A,ADRA1B,AGAP5 (includes others),AGL,AIM2,AJUBA,AKAP13,AKR1B10,ALDH1A3,AMH,ANAPC1,ANAPC2,ANGPTL4,ANKHD1/ANKHD1-EIF4EBP3,ANKRD22,ANKRD23,ANKRD28,ANKS1A,ANTXR2,AOC2,APLP1,ARHGAP44,ARHGAP5,ARHGEF26,ARHGEF7,ARID2,ARMC5,ATF3,ATG2A,ATP13A3,ATR,ATRNL1,ATXN2L,AXIN1,B2M,B3GNT6,BAAT,BCO2,BCR,BEND3,BRCA1,BRF1,BST2,BTBD7,C1orf116,CAD,CAMK2N1,CAMSAP1,CAMSAP2,CASD1,C…	509
Cancer,Organismal Injury and Abnormalities	Breast or pancreatic cancer	8.2e-23		-0.881	ABCC2,ABHD12B,ABL2,ABLIM1,ABTB2,ACP3,ACTA2,ADAD2,ADAMTSL3,ADORA1,ADORA2A,ADRA1B,ADRB1,AGL,AGTPBP1,AIM2,AJUBA,AKAP13,ALDH1A3,ALOX12B,ANAPC2,ANKHD1/ANKHD1-EIF4EBP3,ANKRD18B,ANKRD31,ANKRD34A,ANKRD36C,ANXA9,AOC2,AP1G1,AP4E1,ARFGEF1,ARFGEF2,ARHGAP44,ARHGAP45,ARHGAP8/PRR5-ARHGAP8,ARHGEF26,ARHGEF5,ARHGEF7,ARID2,ASAP1,ATF3,ATG2A,ATR,ATRNL1,AZGP1,B2M,B3GALT5,BCLAF1,BCR,BICC1,BPTF,BRCA1,BRPF1,BRPF3,C19orf1…	477
Cancer,Organismal Injury and Abnormalities,Reproductive System Disease	Breast or ovarian cancer	8.72e-22		-0.568	ABCC2,ABHD12B,ABL2,ABLIM1,ACP3,ACTA2,ADAMTSL3,ADORA1,ADORA2A,ADRA1B,ADRB1,AGL,AGTPBP1,AIM2,AJUBA,AKAP13,ALDH1A3,ALOX12B,ANAPC2,ANKRD18B,ANKRD31,ANKRD36C,ANXA9,ARFGEF1,ARHGAP44,ARHGAP45,ARHGAP8/PRR5-ARHGAP8,ARHGEF26,ARHGEF5,ARHGEF7,ARID2,ASAP1,ATF3,ATG2A,ATR,AZGP1,B2M,B3GALT5,BCLAF1,BCR,BPTF,BRCA1,BRPF1,BRPF3,C19orf18,C2CD4D,CAD,CARD16,CASD1,CCDC125,CCDC30,CCNT1,CD48,CD68,CDC25A,CDC6,CELSR3,CEP120…	371
Cancer,Organismal Injury and Abnormalities,Reproductive System Disease	Uterine tumor	2.93e-21		0.555	ABCC2,ACTG2,ADAMTS16,ADRA1B,ADRB1,AGAP5 (includes others),AGTPBP1,AHCTF1,ALOX12B,ANKRD28,ANKS1A,ANO2,ANTXR2,AOC2,AP1G1,AP4E1,ARFGEF1,ARFGEF2,ARHGEF5,ARID2,ASB5,ATR,ATRNL1,AXIN1,B2M,B3GALT5,BACH1,BICC1,BRCA1,BRF1,BRPF3,CABLES1,CAD,CAMSAP1,CARD16,CCDC30,CCDC40,CCNT1,CD48,CD68,CDC25A,CDC6,CDH8,CELSR3,CEP152,CEP295,CEP44,CFTR,CGN,CIT,CLDN3,CLDN7,CLIP3,CLUH,CNNM1,CNOT1,COL3A1,COL4A5,CPAMD8,CPLANE1,CPS…	362
Cancer,Organismal Injury and Abnormalities,Respiratory Disease	Respiratory system tumor	5.66e-21		1.149	ABCC2,ABL2,ACTA2,ADAMTSL3,ADGRF1,ADORA1,ADORA2A,ADRA1B,AGAP5 (includes others),AGFG2,AGTPBP1,AHCTF1,AJUBA,AKR1B10,AKR1B15,ALDH1A3,ALOX12B,ANAPC1,ANGPTL4,ANKRD13B,ANKRD28,ANO2,ANTXR2,ANXA9,AOC2,AP1G1,ARFGEF1,ARHGAP5,ARID2,ARMC5,ATF3,ATG2A,ATR,ATRNL1,AXIN1,AZIN1,B2M,BAAT,BCLAF1,BICC1,BRCA1,BRF1,CABLES1,CAMSAP1,CC2D1B,CCDC30,CCDC40,CCL5,CCNB1IP1,CD48,CDC6,CDV3,CEACAM1,CELSR3,CEP120,CEP250,CEP295,CEP…	338
Cancer,Organismal Injury and Abnormalities,Reproductive System Disease	Breast or ovarian carcinoma	6.32e-21		-0.629	ABCC2,ABHD12B,ABL2,ABLIM1,ACP3,ACTA2,ADAMTSL3,ADORA1,ADORA2A,ADRA1B,AGL,AGTPBP1,AIM2,AJUBA,ALOX12B,ANAPC2,ANKRD18B,ANKRD31,ANKRD36C,ANXA9,ARFGEF1,ARHGAP44,ARHGEF26,ARHGEF7,ARID2,ASAP1,ATG2A,ATR,AZGP1,B2M,BCLAF1,BCR,BPTF,BRCA1,BRPF1,BRPF3,C19orf18,C2CD4D,CAD,CARD16,CASD1,CCDC125,CCDC30,CCNT1,CD48,CDC25A,CDC6,CELSR3,CEP120,CEP152,CEP295,CFTR,CIT,CLASP1,CLDN3,CLDN7,CLIP3,CLUH,CMTM4,CNNM1,CNOT1,COL1A…	315
Cancer,Organismal Injury and Abnormalities,Reproductive System Disease	Endometrial cancer	1.04e-20			ABCC2,ACTG2,ADAMTS16,AGAP5 (includes others),AGTPBP1,AHCTF1,ALOX12B,ANKRD28,ANKS1A,ANO2,ANTXR2,AOC2,AP1G1,AP4E1,ARFGEF1,ARFGEF2,ARHGEF5,ARID2,ATR,AXIN1,B2M,B3GALT5,BACH1,BICC1,BRCA1,BRPF3,CABLES1,CAD,CAMSAP1,CARD16,CCDC30,CCDC40,CCNT1,CD48,CD68,CDC25A,CDC6,CDH8,CELSR3,CEP152,CEP295,CEP44,CFTR,CGN,CIT,CLDN3,CLDN7,CLIP3,CNNM1,CNOT1,COL3A1,COL4A5,CPAMD8,CPLANE1,CPSF2,CYP1A1,DAPK1,DCAF16,DCAF4,DCN,DD…	330
Cancer,Organismal Injury and Abnormalities	Endometrioid carcinoma	1.48e-19			ABCC2,ADAMTS16,ADORA1,AGAP5 (includes others),AGL,AGTPBP1,AHCTF1,ANAPC2,ANKRD28,ANKRD31,ANKS1A,ANO2,AOC2,AP1G1,AP4E1,ARFGEF1,ARFGEF2,ARHGAP44,ARHGEF26,ARHGEF5,ARID2,ASAP1,ATR,AXIN1,B2M,B3GALT5,BACH1,BCLAF1,BICC1,BRCA1,BRPF3,CAD,CAMSAP1,CASD1,CCDC30,CD68,CDC25A,CDH8,CELSR3,CEP152,CEP295,CEP44,CFTR,CGN,CLDN3,CLDN7,CLIP3,CNOT1,COL1A2,COL4A5,CPAMD8,CPLANE1,CPSF2,CYP1A1,DAPK1,DCAF16,DCAF4,DCN,DDHD1,DD…	325
Cancer,Organismal Injury and Abnormalities	Squamous-cell carcinoma	1.57e-19		-1.255	ABL2,ABTB2,ACTA2,ADAD2,ADAMTSL3,ADORA1,AGAP5 (includes others),AHCTF1,AJUBA,ALOX12B,ANKRD17,ANKRD18B,ANKRD33B,ANKRD36C,AOC2,AP1G1,ARHGAP5,ARID2,ARMC5,ASAP1,ASB5,ATG2A,ATP13A3,ATR,ATRNL1,ATXN2L,AZIN1,B2M,B3GALT5,BAAT,BCLAF1,BCR,BEND3,BICC1,BPTF,BRCA1,BRPF1,BRPF3,BTBD7,C2CD4D,CAD,CAMSAP1,CAMSAP2,CASC3,CASD1,CCDC87,CCNB1IP1,CD48,CDC6,CDH8,CELSR3,CEP250,CEP295,CEP350,CFTR,CHERP,CIPC,CIT,CLASP1,CMPK2,…	349
Cancer,Hematological Disease,Organismal Injury and Abnormalities	Hematologic cancer of cells	1.61e-19		-0.063	ABL2,ADAMTS16,ADAMTSL3,ADORA1,ADORA2A,ADRA1B,ADRB1,AGL,AIM2,ARHGAP42,ARID2,ATF3,ATR,ATRNL1,B2M,BCLAF1,BCR,BICC1,BIRC3,BRCA1,BST2,CAD,CAMK2N1,CD48,CD68,CEP120,CEP250,CEP350,CLDN14,CNOT1,COL1A1,COL1A2,COL3A1,COL4A5,CPSF7,CTSL,CYP1A1,DAGLA,DAPK1,DCN,DDX10,DDX11,DDX58,DGKD,DIAPH1,DLG1,DNAH5,DST,DUSP5,E2F2,ENC1,ENG,EP300,EPAS1,F3,FANCB,FERMT2,FOSL2,FRMD4B,GABRE,GADD45A,GATA2,GATA3,GRIN2D,GSE1,HIC1,HSF…	227
Cancer,Organismal Injury and Abnormalities,Reproductive System Disease	Uterine cancer	1.84e-19			ABCC2,ACTG2,ADAMTS16,AGAP5 (includes others),AGTPBP1,AHCTF1,ALOX12B,ANKRD28,ANKS1A,ANO2,ANTXR2,AOC2,AP1G1,AP4E1,ARFGEF1,ARFGEF2,ARHGEF5,ARID2,ATR,AXIN1,B2M,B3GALT5,BACH1,BICC1,BRCA1,BRPF3,CABLES1,CAD,CAMSAP1,CARD16,CCDC30,CCDC40,CCNT1,CD48,CD68,CDC25A,CDC6,CDH8,CELSR3,CEP152,CEP295,CEP44,CFTR,CGN,CIT,CLDN3,CLDN7,CLIP3,CNNM1,CNOT1,COL3A1,COL4A5,CPAMD8,CPLANE1,CPSF2,CTSL,CYP1A1,DAPK1,DCAF16,DCAF4,D…	344
Cancer,Organismal Injury and Abnormalities,Reproductive System Disease	Prostatic carcinoma	2.44e-19			ABL2,ACP3,ADAMTS16,ADRA1B,ADRB1,AGAP5 (includes others),AGBL3,AHCTF1,AKAP13,AMPD3,ANAPC1,ANKHD1/ANKHD1-EIF4EBP3,ANKRD13B,ANKRD17,ANKRD31,ANTXR2,ANXA9,AP1G1,ARFGEF2,ARHGAP42,ARHGAP44,ARHGAP5,ARID2,ATG2A,ATR,ATRNL1,ATXN1L,ATXN2L,B2M,BAAT,BACH1,BCR,BICC1,BPTF,BRF1,BRPF1,C1orf116,CACHD1,CAD,CAMSAP1,CAPN7,CASD1,CC2D1B,CCDC40,CDH8,CEACAM1,CELSR3,CEP120,CEP44,CFTR,CHERP,CIT,CLASP1,CLIP3,CLSTN3,CLUH,CNOT…	337
Cancer,Organismal Injury and Abnormalities,Reproductive System Disease	Prostatic adenocarcinoma	4e-19			ABL2,ACP3,ADAMTS16,ADRA1B,ADRB1,AGAP5 (includes others),AGBL3,AHCTF1,AKAP13,AMPD3,ANAPC1,ANKHD1/ANKHD1-EIF4EBP3,ANKRD13B,ANKRD17,ANKRD31,ANXA9,AP1G1,ARFGEF2,ARHGAP42,ARHGAP44,ARHGAP5,ARID2,ATG2A,ATR,ATRNL1,ATXN1L,ATXN2L,BAAT,BACH1,BCR,BICC1,BPTF,BRF1,BRPF1,C1orf116,CACHD1,CAD,CAMSAP1,CAPN7,CASD1,CC2D1B,CCDC40,CDH8,CEACAM1,CELSR3,CEP120,CEP44,CFTR,CHERP,CIT,CLASP1,CLIP3,CLSTN3,CLUH,CNOT1,COBL,COL1…	325
Cancer,Organismal Injury and Abnormalities	Lymphoreticular neoplasm	4.09e-19		-0.519	ABCC2,ABHD12B,ABL2,ADAMTSL3,ADORA1,ADORA2A,ADRA1B,ADRB1,AGAP5 (includes others),AIM2,AKAP13,ALOX12B,ANAPC1,ANGPTL4,ANKHD1/ANKHD1-EIF4EBP3,ANKRD18B,ANKRD22,ANO2,APLP1,ARHGAP42,ARHGEF5,ARID2,ATF3,AZIN1,B2M,BAAT,BCLAF1,BCR,BICC1,BIRC3,BRCA1,BRPF1,BST2,CAD,CCDC40,CCL5,CD48,CD68,CDC25A,CDH8,CELSR3,CEP120,CEP250,CEP350,CIPC,CLASP1,CLDN7,CLUH,CNOT1,COL1A1,COL1A2,COL3A1,COL4A5,CPLANE1,CPSF7,CSF3,CTSL,CYP…	311
Cancer,Organismal Injury and Abnormalities,Reproductive System Disease	Male genital neoplasm	4.17e-19		0.631	ABL2,ACP3,ADAMTS16,ADRA1B,ADRB1,AGAP5 (includes others),AGBL3,AHCTF1,AKAP13,AMH,AMPD3,ANAPC1,ANKHD1/ANKHD1-EIF4EBP3,ANKRD13B,ANKRD17,ANKRD31,ANTXR2,ANXA9,AP1G1,ARFGEF2,ARHGAP42,ARHGAP44,ARHGAP5,ARID2,ATF3,ATG2A,ATR,ATRNL1,ATXN1L,ATXN2L,B2M,BAAT,BACH1,BCR,BICC1,BPTF,BRCA1,BRF1,BRPF1,C1orf116,CACHD1,CAD,CAMSAP1,CAPN7,CASC3,CASD1,CC2D1B,CCDC40,CCL5,CDH8,CEACAM1,CELSR3,CEP120,CEP44,CFTR,CGN,CHERP,CHM…	381
Cancer,Hematological Disease,Immunological Disease,Organismal Injury and Abnormalities	Neoplasia of leukocytes	4.4e-19		0.036	ABL2,ADAMTS16,ADAMTSL3,ADORA1,ADORA2A,ADRA1B,ADRB1,AGL,AIM2,ALOX12B,ARHGAP42,ARID2,ATF3,ATR,ATRNL1,AXIN1,B2M,BCLAF1,BCR,BICC1,BIRC3,BRCA1,BST2,CAD,CAMK2N1,CCL5,CD48,CD68,CEP120,CEP250,CEP350,CLDN14,CNOT1,COL1A1,COL1A2,COL3A1,COL4A5,CPSF7,CTSL,CYP1A1,DAGLA,DAPK1,DCN,DDX10,DDX11,DDX58,DGKD,DIAPH1,DLG1,DNAH5,DST,DUSP5,E2F2,ENC1,ENG,EP300,EPAS1,EPSTI1,F3,FANCB,FCGR1A,FERMT2,FOSL2,FRMD4B,GABRE,GADD45A…	236
Cancer,Hematological Disease,Organismal Injury and Abnormalities	Hematologic cancer	5.23e-19		-0.898	ABCC2,ABHD12B,ABL2,ADAMTS16,ADAMTSL3,ADORA1,ADORA2A,ADRA1B,ADRB1,AGAP5 (includes others),AGL,AIM2,AKAP13,ALOX12B,ANAPC1,ANGPTL4,ANKHD1/ANKHD1-EIF4EBP3,ANKRD18B,ANKRD22,ANO2,APLP1,ARHGAP42,ARHGEF5,ARID2,ATF3,ATR,ATRNL1,AXIN1,AZIN1,B2M,BAAT,BCLAF1,BCR,BICC1,BIRC3,BRCA1,BRPF1,BST2,CAD,CAMK2N1,CCDC40,CCL5,CD48,CD68,CDC25A,CDH8,CELSR3,CEP120,CEP250,CEP350,CIPC,CLASP1,CLDN14,CLDN7,CLUH,CNOT1,COL1A1,COL…	341
Cancer,Organismal Injury and Abnormalities,Reproductive System Disease	Malignant neoplasm of male genital organ	6.12e-19		-0.017	ABL2,ACP3,ADAMTS16,ADRA1B,ADRB1,AGAP5 (includes others),AGBL3,AHCTF1,AKAP13,AMPD3,ANAPC1,ANKHD1/ANKHD1-EIF4EBP3,ANKRD13B,ANKRD17,ANKRD31,ANTXR2,ANXA9,AP1G1,ARFGEF2,ARHGAP42,ARHGAP44,ARHGAP5,ARID2,ATF3,ATG2A,ATR,ATRNL1,ATXN1L,ATXN2L,B2M,BAAT,BACH1,BCR,BICC1,BPTF,BRCA1,BRF1,BRPF1,C1orf116,CACHD1,CAD,CAMSAP1,CAPN7,CASC3,CASD1,CC2D1B,CCDC40,CCL5,CDH8,CEACAM1,CELSR3,CEP120,CEP44,CFTR,CGN,CHERP,CIT,CLA…	378
Cancer,Organismal Injury and Abnormalities	Lymphohematopoietic cancer	7.22e-19		-1.161	ABCC2,ABHD12B,ABL2,ADAMTS16,ADAMTSL3,ADORA1,ADORA2A,ADRA1B,ADRB1,AGAP5 (includes others),AGL,AIM2,AKAP13,ALOX12B,ANAPC1,ANGPTL4,ANKHD1/ANKHD1-EIF4EBP3,ANKRD18B,ANKRD22,ANO2,APLP1,ARHGAP42,ARHGEF5,ARID2,ATF3,ATR,ATRNL1,AXIN1,AZIN1,B2M,BAAT,BCLAF1,BCR,BICC1,BIRC3,BRCA1,BRPF1,BST2,CAD,CAMK2N1,CCDC40,CCL5,CD48,CD68,CDC25A,CDH8,CELSR3,CEP120,CEP250,CEP350,CIPC,CLASP1,CLDN14,CLDN7,CLUH,CNOT1,COL1A1,COL…	342
Cancer,Organismal Injury and Abnormalities,Reproductive System Disease	Endometrial carcinoma	8.19e-19			ABCC2,ADAMTS16,AGAP5 (includes others),AGTPBP1,AHCTF1,ALOX12B,ANKRD28,ANKS1A,ANO2,AOC2,AP1G1,AP4E1,ARFGEF1,ARFGEF2,ARHGEF5,ARID2,ATR,AXIN1,B2M,B3GALT5,BACH1,BICC1,BRCA1,BRPF3,CABLES1,CAD,CAMSAP1,CARD16,CCDC30,CCDC40,CCNT1,CD48,CD68,CDC25A,CDC6,CDH8,CELSR3,CEP152,CEP295,CEP44,CFTR,CGN,CLIP3,CNNM1,CNOT1,COL3A1,COL4A5,CPAMD8,CPLANE1,CPSF2,CYP1A1,DAPK1,DCAF16,DCAF4,DCN,DDHD1,DDX11,DDX42,DDX58,DGCR8,D…	308
Cancer,Hematological Disease,Organismal Injury and Abnormalities	Hematopoietic neoplasm	8.24e-19		-1.114	ABCC2,ABHD12B,ABL2,ADAMTS16,ADAMTSL3,ADORA1,ADORA2A,ADRA1B,ADRB1,AGAP5 (includes others),AGL,AIM2,AKAP13,ALOX12B,ANAPC1,ANGPTL4,ANKHD1/ANKHD1-EIF4EBP3,ANKRD18B,ANKRD22,ANO2,APLP1,ARHGAP42,ARHGEF5,ARID2,ATF3,ATR,ATRNL1,AXIN1,AZIN1,B2M,BAAT,BCLAF1,BCR,BICC1,BIRC3,BRCA1,BRPF1,BST2,CAD,CAMK2N1,CCDC40,CCL5,CD48,CD68,CDC25A,CDH8,CELSR3,CEP120,CEP250,CEP350,CIPC,CLASP1,CLDN14,CLDN7,CLUH,CNOT1,COL1A1,COL…	344
Cancer,Organismal Injury and Abnormalities	Extrapulmonary squamous cell carcinoma	8.95e-19			ABL2,ABTB2,ACTA2,ADAD2,ADAMTSL3,ADORA1,AGAP5 (includes others),AJUBA,ALOX12B,ANKRD17,ANKRD18B,ANKRD33B,ANKRD36C,AP1G1,ARHGAP5,ARID2,ARMC5,ASAP1,ASB5,ATG2A,ATP13A3,ATR,ATRNL1,ATXN2L,AZIN1,B2M,B3GALT5,BAAT,BCLAF1,BCR,BEND3,BICC1,BPTF,BRCA1,BRPF1,BRPF3,BTBD7,C2CD4D,CAD,CAMSAP1,CAMSAP2,CASC3,CASD1,CCDC87,CCNB1IP1,CD48,CDC6,CDH8,CELSR3,CEP250,CEP295,CEP350,CFTR,CHERP,CIPC,CIT,CLASP1,CMPK2,CNOT1,COBL,C…	325
Cancer,Organismal Injury and Abnormalities	Lymphohematopoietic neoplasia	1.02e-18		-1.361	ABCC2,ABHD12B,ABL2,ADAMTS16,ADAMTSL3,ADORA1,ADORA2A,ADRA1B,ADRB1,AGAP5 (includes others),AGL,AIM2,AKAP13,ALOX12B,ANAPC1,ANGPTL4,ANKHD1/ANKHD1-EIF4EBP3,ANKRD18B,ANKRD22,ANO2,APLP1,ARHGAP42,ARHGEF5,ARID2,ATF3,ATR,ATRNL1,AXIN1,AZIN1,B2M,BAAT,BCLAF1,BCR,BICC1,BIRC3,BRCA1,BRPF1,BST2,CAD,CAMK2N1,CCDC40,CCL5,CD48,CD68,CDC25A,CDH8,CELSR3,CEP120,CEP250,CEP350,CIPC,CLASP1,CLDN14,CLDN7,CLUH,CNOT1,COL1A1,COL…	345
Cancer,Hematological Disease,Organismal Injury and Abnormalities	Neoplasia of blood cells	1.03e-18		-0.912	ABCC2,ABHD12B,ABL2,ADAMTS16,ADAMTSL3,ADORA1,ADORA2A,ADRA1B,ADRB1,AGAP5 (includes others),AGL,AIM2,AKAP13,ALOX12B,ANAPC1,ANGPTL4,ANKHD1/ANKHD1-EIF4EBP3,ANKRD18B,ANKRD22,ANO2,APLP1,ARHGAP42,ARHGEF5,ARID2,ATF3,ATR,ATRNL1,AXIN1,AZIN1,B2M,BAAT,BCLAF1,BCR,BICC1,BIRC3,BRCA1,BRPF1,BST2,CAD,CAMK2N1,CCDC40,CCL5,CD48,CD68,CDC25A,CDH8,CELSR3,CEP120,CEP250,CEP350,CIPC,CLASP1,CLDN14,CLDN7,CLUH,CNOT1,COL1A1,COL…	341
Cancer,Hematological Disease,Immunological Disease,Organismal Injury and Abnormalities	Lymphocytic cancer	1.03e-18		0.203	ABL2,ADAMTS16,ADAMTSL3,ADORA1,ADORA2A,ADRA1B,ADRB1,AGL,AIM2,ALOX12B,ARHGAP42,ARID2,ATF3,ATR,ATRNL1,AXIN1,B2M,BCLAF1,BCR,BICC1,BIRC3,BRCA1,BST2,CAD,CAMK2N1,CCL5,CD48,CD68,CEP120,CEP250,CEP350,CLDN14,CNOT1,COL1A1,COL1A2,COL3A1,COL4A5,CPSF7,CTSL,CYP1A1,DAGLA,DAPK1,DCN,DDX10,DDX11,DDX58,DGKD,DIAPH1,DLG1,DNAH5,DST,DUSP5,E2F2,ENC1,ENG,EP300,EPAS1,EPSTI1,F3,FANCB,FERMT2,FOSL2,FRMD4B,GABRE,GADD45A,GATA2,…	234
Cancer,Hematological Disease,Organismal Injury and Abnormalities	Lymphocytic neoplasm	1.23e-18		0.203	ABL2,ADAMTS16,ADAMTSL3,ADORA1,ADORA2A,ADRA1B,ADRB1,AGL,AIM2,ALOX12B,ARHGAP42,ARID2,ATF3,ATR,ATRNL1,AXIN1,B2M,BCLAF1,BCR,BICC1,BIRC3,BRCA1,BST2,CAD,CAMK2N1,CCL5,CD48,CD68,CEP120,CEP250,CEP350,CLDN14,CNOT1,COL1A1,COL1A2,COL3A1,COL4A5,CPSF7,CTSL,CYP1A1,DAGLA,DAPK1,DCN,DDX10,DDX11,DDX58,DGKD,DIAPH1,DLG1,DNAH5,DST,DUSP5,E2F2,ENC1,ENG,EP300,EPAS1,EPSTI1,F3,FANCB,FERMT2,FOSL2,FRMD4B,GABRE,GADD45A,GATA2,…	234
Cancer,Organismal Injury and Abnormalities,Reproductive System Disease	Prostate cancer	1.4e-18		-0.017	ABL2,ACP3,ADAMTS16,ADRA1B,ADRB1,AGAP5 (includes others),AGBL3,AHCTF1,AKAP13,AMPD3,ANAPC1,ANKHD1/ANKHD1-EIF4EBP3,ANKRD13B,ANKRD17,ANKRD31,ANTXR2,ANXA9,AP1G1,ARFGEF2,ARHGAP42,ARHGAP44,ARHGAP5,ARID2,ATF3,ATG2A,ATR,ATRNL1,ATXN1L,ATXN2L,B2M,BAAT,BACH1,BCR,BICC1,BPTF,BRCA1,BRF1,BRPF1,C1orf116,CACHD1,CAD,CAMSAP1,CAPN7,CASC3,CASD1,CC2D1B,CCDC40,CCL5,CDH8,CEACAM1,CELSR3,CEP120,CEP44,CFTR,CGN,CHERP,CIT,CLA…	373
Cancer,Organismal Injury and Abnormalities	Lymphoid cancer	1.96e-18		-0.128	ABL2,ADAMTS16,ADAMTSL3,ADORA1,ADORA2A,ADRA1B,ADRB1,AGL,AIM2,ALOX12B,ARHGAP42,ARID2,ATF3,ATR,ATRNL1,AXIN1,B2M,BCLAF1,BCR,BICC1,BIRC3,BRCA1,BST2,CAD,CAMK2N1,CCL5,CD48,CD68,CEP120,CEP250,CEP350,CLDN14,CNOT1,COL1A1,COL1A2,COL3A1,COL4A5,CPSF7,CTSL,CYP1A1,DAGLA,DAPK1,DCN,DDX10,DDX11,DDX58,DGKD,DIAPH1,DLG1,DNAH5,DST,DUSP5,E2F2,ENC1,ENG,EP300,EPAS1,EPSTI1,F3,FANCB,FERMT2,FOSL2,FRMD4B,GABRE,GADD45A,GATA2,…	235
Cancer,Organismal Injury and Abnormalities,Reproductive System Disease	Prostatic tumor	2.05e-18		0.122	ABL2,ACP3,ADAMTS16,ADRA1B,ADRB1,AGAP5 (includes others),AGBL3,AHCTF1,AKAP13,AMPD3,ANAPC1,ANKHD1/ANKHD1-EIF4EBP3,ANKRD13B,ANKRD17,ANKRD31,ANTXR2,ANXA9,AP1G1,ARFGEF2,ARHGAP42,ARHGAP44,ARHGAP5,ARID2,ATF3,ATG2A,ATR,ATRNL1,ATXN1L,ATXN2L,B2M,BAAT,BACH1,BCR,BICC1,BPTF,BRCA1,BRF1,BRPF1,C1orf116,CACHD1,CAD,CAMSAP1,CAPN7,CASC3,CASD1,CC2D1B,CCDC40,CCL5,CDH8,CEACAM1,CELSR3,CEP120,CEP44,CFTR,CGN,CHERP,CIT,CLA…	374
Cancer,Organismal Injury and Abnormalities	Extraadrenal retroperitoneal tumor	7.77e-18		-0.048	ABTB2,ADAD2,ADAMTSL3,ADORA1,ADORA2A,AGAP1,AGL,AIM2,AJUBA,AKAP13,ANKHD1/ANKHD1-EIF4EBP3,ANKRD34A,AOC2,AP1G1,AP4E1,ARFGEF2,ARHGAP5,ARHGEF7,ARID2,ASAP1,ATG2A,ATP13A3,ATR,ATRNL1,ATXN2L,AZGP1,B2M,BICC1,BRCA1,BRF1,BRPF3,CAD,CAMSAP2,CAPN7,CARD19,CASD1,CC2D1B,CCDC30,CCN3,CCNB1IP1,CD68,CDAN1,CDC6,CDH8,CELSR3,CEP295,CEP95,CFTR,CHERP,CIPC,CIT,CLASP1,CLIP3,CLUH,CMPK2,CNNM1,CNOT1,COL1A1,COL1A2,CPLANE1,CTSL,CY…	355
Cancer,Organismal Injury and Abnormalities,Reproductive System Disease	Uterine carcinoma	1.09e-17			ABCC2,ADAMTS16,AGAP5 (includes others),AGTPBP1,AHCTF1,ALOX12B,ANKRD28,ANKS1A,ANO2,AOC2,AP1G1,AP4E1,ARFGEF1,ARFGEF2,ARHGEF5,ARID2,ATR,AXIN1,B2M,B3GALT5,BACH1,BICC1,BRCA1,BRPF3,CABLES1,CAD,CAMSAP1,CARD16,CCDC30,CCDC40,CCNT1,CD48,CD68,CDC25A,CDC6,CDH8,CELSR3,CEP152,CEP295,CEP44,CFTR,CGN,CLDN3,CLIP3,CNNM1,CNOT1,COL3A1,COL4A5,CPAMD8,CPLANE1,CPSF2,CTSL,CYP1A1,DAPK1,DCAF16,DCAF4,DCN,DDHD1,DDX11,DDX42,DD…	319
Cancer,Organismal Injury and Abnormalities,Renal and Urological Disease	Urinary tract cancer	1.14e-17		1.915	ACP3,ADAMTS16,ADAMTSL3,ADORA1,ADORA2A,AGFG2,AGL,AGTPBP1,AJUBA,AKAP13,ALOX12B,ANKHD1/ANKHD1-EIF4EBP3,ANKRD34A,ARHGAP5,ARHGEF7,ARID2,ASAP1,ATF3,ATG2A,ATP13A3,ATR,ATXN2L,B2M,BCLAF1,BCR,BIRC3,BRCA1,BRPF3,BTBD7,CAD,CCDC40,CD48,CD68,CDC6,CELF5,CELSR3,CEP152,CEP350,CEP95,CIT,CLASP1,CLIP3,COL1A2,CRELD1,CTSL,CYP1A1,DAGLA,DAPK1,DCN,DDX10,DDX21,DDX58,DGCR8,DHX35,DHX9,DLG1,DLX3,DNAH5,DNAJC6,DOT1L,DST,EIF4A2,…	243
Cancer,Organismal Injury and Abnormalities,Renal and Urological Disease	Urinary tract tumor	1.55e-17		1.463	ACP3,ADAMTS16,ADAMTSL3,ADORA1,ADORA2A,AGFG2,AGL,AGTPBP1,AJUBA,AKAP13,ALOX12B,ANKHD1/ANKHD1-EIF4EBP3,ANKRD34A,ARHGAP5,ARHGEF7,ARID2,ASAP1,ATF3,ATG2A,ATP13A3,ATR,ATXN2L,B2M,BCLAF1,BCR,BIRC3,BRCA1,BRF1,BRPF3,BTBD7,CAD,CCDC40,CD48,CD68,CDC6,CELF5,CELSR3,CEP152,CEP350,CEP95,CIT,CLASP1,CLIP3,COL1A2,CRELD1,CTSL,CYP1A1,DAGLA,DAPK1,DCN,DDX10,DDX21,DDX58,DGCR8,DHX35,DHX9,DLG1,DLX3,DNAH5,DNAJC6,DOT1L,DST,EI…	247
Cancer,Hematological Disease,Immunological Disease,Organismal Injury and Abnormalities	Lymphoma	1.75e-17		0.867	ABL2,ADAMTSL3,ADORA1,ADORA2A,ADRA1B,ADRB1,AIM2,ARHGAP42,ATF3,B2M,BCLAF1,BICC1,BIRC3,BRCA1,BST2,CAD,CD48,CD68,CEP120,CEP250,CEP350,CNOT1,COL1A1,COL1A2,COL3A1,COL4A5,CPSF7,CTSL,DAPK1,DCN,DDX10,DDX11,DDX58,DGKD,DIAPH1,DLG1,DNAH5,DST,DUSP5,E2F2,ENG,EP300,EPAS1,FANCB,FERMT2,FOSL2,GADD45A,GATA3,GRIN2D,GSE1,HIC1,HSF4,IFI35,IFI44,IFI44L,IFI6,IFIT3,IFITM1,IKZF2,IL18,IL22RA1,IL2RB,IL5,IRF7,ISG15,ISG20,ITGA…	183
Cancer,Organismal Injury and Abnormalities,Reproductive System Disease	Endometrial adenocarcinoma	3.08e-17			ABCC2,ADAMTS16,AGAP5 (includes others),AGTPBP1,AHCTF1,ANKRD28,ANKS1A,ANO2,AOC2,AP1G1,AP4E1,ARFGEF1,ARFGEF2,ARHGEF5,ARID2,ATR,AXIN1,B2M,B3GALT5,BACH1,BICC1,BRCA1,BRPF3,CAD,CAMSAP1,CCDC30,CD68,CDC25A,CDC6,CDH8,CELSR3,CEP152,CEP295,CEP44,CFTR,CGN,CLIP3,CNOT1,COL4A5,CPAMD8,CPLANE1,CPSF2,CYP1A1,DAPK1,DCAF16,DCAF4,DCN,DDHD1,DDX42,DDX58,DGCR8,DHX38,DHX9,DNAH11,DNAH5,DNAJC6,DOT1L,DST,EIF2AK2,EIF4A2,ELF3,…	274
Cancer,Organismal Injury and Abnormalities	Upper aerodigestive tract carcinoma	6.96e-17			ADAMTS16,ADAMTSL3,ADORA1,AGAP5 (includes others),AIM2,ALOX12B,ANKRD17,ANKRD36C,AP1G1,ARFGEF2,ARHGAP5,ARID2,ARMC5,ASAP1,ASB5,ATG2A,ATP13A3,ATR,ATRNL1,ATXN2L,AXIN1,AZIN1,B2M,BAAT,BICC1,BRPF3,BTBD7,C1orf116,CAD,CAMSAP2,CASC3,CCDC30,CCNB1IP1,CD48,CDH8,CDV3,CELSR3,CEP250,CEP295,CEP350,CEP95,CFTR,CHERP,CIPC,CLASP1,CNOT1,COL1A1,COL1A2,CPAMD8,CYP1A1,DAPK1,DCN,DDX10,DDX11,DDX47,DDX58,DNAH5,DOCK3,DOT1L,DST…	243
Cancer,Hematological Disease,Organismal Injury and Abnormalities	Mature lymphocytic neoplasm	7.41e-17			ADAMTS16,ADAMTSL3,ADRA1B,ADRB1,AGL,AIM2,ALOX12B,ARHGAP42,ARID2,ATF3,ATR,ATRNL1,AXIN1,B2M,BCLAF1,BICC1,BIRC3,BRCA1,CAD,CCL5,CD48,CD68,CEP120,CEP250,CEP350,CLDN14,CNOT1,COL1A1,COL1A2,COL3A1,COL4A5,CPSF7,CTSL,DAGLA,DAPK1,DDX10,DDX58,DGKD,DIAPH1,DLG1,DNAH5,DST,DUSP5,E2F2,ENC1,ENG,EP300,EPAS1,EPSTI1,FANCB,FERMT2,FRMD4B,GABRE,GADD45A,GATA3,GRIN2D,GSE1,HIC1,HSF4,IFI35,IFI44,IFI44L,IFI6,IFIT3,IFITM1,IL22…	193
Cancer,Organismal Injury and Abnormalities	Malignant neoplasm of aerodigestive tract	8.53e-17			ADAMTS16,ADAMTSL3,ADORA1,AGAP5 (includes others),AIM2,ALOX12B,ANKRD17,ANKRD36C,AP1G1,ARFGEF2,ARHGAP5,ARID2,ARMC5,ASAP1,ASB5,ATG2A,ATP13A3,ATR,ATRNL1,ATXN2L,AXIN1,AZIN1,B2M,BAAT,BICC1,BRPF3,BTBD7,C1orf116,CAD,CAMSAP2,CASC3,CCDC30,CCNB1IP1,CD48,CDH8,CDV3,CELSR3,CEP250,CEP295,CEP350,CEP95,CFTR,CHERP,CIPC,CLASP1,CNOT1,COL1A1,COL1A2,CPAMD8,CYP1A1,DAPK1,DCN,DDX10,DDX11,DDX47,DDX58,DNAH5,DOCK3,DOT1L,DST…	247
Cancer,Organismal Injury and Abnormalities,Reproductive System Disease	Uterine endometrioid carcinoma	1.82e-16			ABCC2,ADAMTS16,AGAP5 (includes others),AGTPBP1,AHCTF1,ANKRD28,ANKS1A,ANO2,AOC2,AP1G1,AP4E1,ARFGEF1,ARFGEF2,ARHGEF5,ARID2,ATR,AXIN1,B2M,B3GALT5,BACH1,BICC1,BRCA1,BRPF3,CAD,CAMSAP1,CCDC30,CD68,CDC25A,CDH8,CELSR3,CEP152,CEP295,CEP44,CFTR,CGN,CNOT1,COL4A5,CPAMD8,CPLANE1,CPSF2,CYP1A1,DAPK1,DCAF16,DCAF4,DCN,DDHD1,DDX42,DDX58,DGCR8,DHX38,DHX9,DNAH11,DNAH5,DNAJC6,DOT1L,DST,EIF2AK2,EIF4A2,ELF3,ENG,EP300,E…	265
Cancer,Organismal Injury and Abnormalities	Upper aero-digestive squamous cell carcinoma	2.5e-16			ADAMTSL3,ADORA1,AGAP5 (includes others),ALOX12B,ANKRD17,AP1G1,ARHGAP5,ARID2,ARMC5,ASAP1,ASB5,ATG2A,ATP13A3,ATRNL1,ATXN2L,AZIN1,BAAT,BICC1,BRPF3,BTBD7,CAD,CAMSAP2,CASC3,CCNB1IP1,CD48,CDH8,CELSR3,CEP250,CEP295,CEP350,CFTR,CIPC,CLASP1,CNOT1,COL1A1,COL1A2,CYP1A1,DCN,DDX10,DDX11,DDX47,DDX58,DNAH5,DOCK3,DZIP3,EIF2S3,EIF3A,EML4,EP300,EPB41L2,ERV3-1,ESRP2,FAM83G,FANCB,FBXO10,FGD3,FNBP1L,FOSL2,FRS2,GALNT5…	199
Cancer,Organismal Injury and Abnormalities,Respiratory Disease	Lung tumor	2.51e-16		1.149	ABCC2,ABL2,ACTA2,ADGRF1,ADORA1,ADORA2A,ADRA1B,AGAP5 (includes others),AGFG2,AGTPBP1,AHCTF1,AJUBA,AKR1B10,AKR1B15,ALDH1A3,ANAPC1,ANGPTL4,ANKRD13B,ANKRD28,ANO2,ANTXR2,ANXA9,AOC2,ARFGEF1,ARHGAP5,ARID2,ATF3,ATR,ATRNL1,AXIN1,B2M,BCLAF1,BRCA1,BRF1,CABLES1,CAMSAP1,CC2D1B,CCDC40,CCL5,CCNB1IP1,CD48,CDC6,CEACAM1,CEP120,CEP295,CHM,CIT,CLDN3,CLIP4,CLUH,CNOT1,COL1A1,COL3A1,COL4A5,CPAMD8,CPLANE1,CREB5,CSF3,CUL…	283
Cancer,Gastrointestinal Disease,Organismal Injury and Abnormalities	Oral cavity carcinoma	3e-16			ADAMTSL3,AGAP5 (includes others),ANKRD17,ARHGAP5,ARID2,ARMC5,ASAP1,ASB5,ATP13A3,ATRNL1,ATXN2L,AZIN1,BRPF3,BTBD7,CAD,CAMSAP2,CASC3,CCNB1IP1,CD48,CDH8,CEP250,CEP295,CFTR,CIPC,CNOT1,CYP1A1,DCN,DDX10,DDX11,DDX47,DDX58,EIF2S3,EIF3A,EP300,ERV3-1,ESRP2,FAM83G,FANCB,FBXO10,FGD3,FNBP1L,GATA3,GCH1,GEMIN5,GIGYF2,GJC1,GRK5,HIVEP2,HOXA11,HOXC6,HSPB6,IKZF2,IL1A,JCAD,JPH1,KAT6B,KHDC4,KIAA0100,KIAA1549,KIF3B,KNT…	150
Antimicrobial Response,Inflammatory Response	Antiviral response	3.59e-16	Increased	2.269	ACTA2,AIM2,BIRC3,BST2,CCL5,DDIT4,DDX21,DDX58,DHX58,DHX9,EIF2AK2,FCGR1A,GATA3,IFI16,IFI27,IFI44,IFI44L,IFI6,IFIH1,IFIT1,IFIT3,IFIT5,IFITM1,IFITM3,IRF7,ISG15,ISG20,ITCH,MAP3K14,MX1,MX2,OAS1,OAS2,OAS3,OASL,ODC1,PARP9,PLAAT4,PLSCR1,RSAD2,SELENOK,SHFL,SIN3A,SLFN13,SOCS1,STAT1,STING1,TNFRSF9,TP53,UNC13D,ZCCHC3	51
Cancer,Organismal Injury and Abnormalities	Thoracic neoplasm	4.76e-16		0.97	ABCC2,ABL2,ACTA2,ADGRF1,ADORA1,ADORA2A,ADRA1B,AGAP5 (includes others),AGFG2,AGTPBP1,AHCTF1,AJUBA,AKR1B10,AKR1B15,ALDH1A3,ANAPC1,ANGPTL4,ANKRD13B,ANKRD28,ANO2,ANTXR2,ANXA9,AOC2,ARFGEF1,ARHGAP5,ARID2,ATF3,ATR,ATRNL1,AXIN1,B2M,BCLAF1,BRCA1,BRF1,CABLES1,CAMSAP1,CC2D1B,CCDC40,CCL5,CCNB1IP1,CD48,CDC6,CEACAM1,CEP120,CEP295,CHM,CIT,CLDN3,CLIP4,CLUH,CNOT1,COL1A1,COL3A1,COL4A5,CPAMD8,CPLANE1,CREB5,CSF3,CUL…	284
Cancer,Organismal Injury and Abnormalities,Reproductive System Disease	Mammary tumor	5.73e-16		0.225	ABCC2,ABL2,ABLIM1,ACTA2,ADRA1B,ADRB1,AGTPBP1,AIM2,AJUBA,AKAP13,ALDH1A3,ALOX12B,ANKRD18B,ANKRD31,ANXA9,ARFGEF1,ARHGAP45,ARHGAP8/PRR5-ARHGAP8,ARHGEF5,ARHGEF7,ARID2,ASAP1,ATF3,ATG2A,ATR,B3GALT5,BCR,BPTF,BRCA1,BRPF1,C19orf18,C2CD4D,CCDC125,CCDC30,CCL5,CCNT1,CD48,CD68,CDC25A,CDC6,CEP250,CFTR,CIT,CLDN3,CMPK2,CNNM1,COL1A1,COL1A2,CPAMD8,CPLANE1,CSF3,CYP1A1,CYP26A1,DAPK1,DCN,DDHD1,DDIT4,DDX11,DHX58,DNAAF1…	268
Cancer,Organismal Injury and Abnormalities,Reproductive System Disease	Endometrioid endometrial adenocarcinoma	5.92e-16			ABCC2,ADAMTS16,AGAP5 (includes others),AGTPBP1,AHCTF1,ANKRD28,ANKS1A,ANO2,AOC2,AP1G1,AP4E1,ARFGEF1,ARFGEF2,ARHGEF5,ARID2,ATR,AXIN1,B2M,B3GALT5,BACH1,BICC1,BRPF3,CAD,CAMSAP1,CCDC30,CD68,CDC25A,CDH8,CELSR3,CEP152,CEP295,CEP44,CFTR,CGN,CNOT1,COL4A5,CPAMD8,CPLANE1,CPSF2,CYP1A1,DAPK1,DCAF16,DCAF4,DCN,DDHD1,DDX42,DDX58,DGCR8,DHX38,DHX9,DNAH11,DNAH5,DNAJC6,DOT1L,DST,EIF2AK2,ENG,EP300,EP400,EPB41L2,ERVW-…	260
Cancer,Gastrointestinal Disease,Organismal Injury and Abnormalities	Oral tumor	6.14e-16			ADAMTSL3,AGAP5 (includes others),ANKRD17,ARHGAP5,ARID2,ARMC5,ASAP1,ASB5,ATP13A3,ATRNL1,ATXN2L,AZIN1,BRPF3,BTBD7,CAD,CAMSAP2,CASC3,CCNB1IP1,CD48,CDH8,CEP250,CEP295,CFTR,CIPC,CNOT1,COL1A1,CYP1A1,DCN,DDX10,DDX11,DDX47,DDX58,EIF2S3,EIF3A,EP300,ERV3-1,ESRP2,FAM83G,FANCB,FBXO10,FGD3,FNBP1L,GATA3,GCH1,GEMIN5,GIGYF2,GJC1,GRK5,HIVEP2,HOXA11,HOXC6,HSPB6,IKZF2,IL1A,JCAD,JPH1,KAT6B,KHDC4,KIAA0100,KIAA1549,KI…	152
Cancer,Gastrointestinal Disease,Organismal Injury and Abnormalities	Oral squamous cell carcinoma	7.27e-16			ADAMTSL3,AGAP5 (includes others),ANKRD17,ARHGAP5,ARMC5,ASAP1,ASB5,ATP13A3,ATRNL1,ATXN2L,AZIN1,BRPF3,BTBD7,CAD,CAMSAP2,CASC3,CCNB1IP1,CD48,CDH8,CEP250,CEP295,CFTR,CIPC,CNOT1,CYP1A1,DCN,DDX10,DDX11,DDX47,DDX58,EIF2S3,EIF3A,EP300,ERV3-1,ESRP2,FAM83G,FANCB,FBXO10,FGD3,FNBP1L,GCH1,GEMIN5,GIGYF2,GJC1,GRK5,HIVEP2,HOXA11,HOXC6,HSPB6,IKZF2,IL1A,JCAD,JPH1,KAT6B,KHDC4,KIAA0100,KIAA1549,KIF3B,KNTC1,LRPPRC,LR…	145
Cancer,Gastrointestinal Disease,Organismal Injury and Abnormalities	Oral cancer	7.82e-16			ADAMTSL3,AGAP5 (includes others),ANKRD17,ARHGAP5,ARID2,ARMC5,ASAP1,ASB5,ATP13A3,ATRNL1,ATXN2L,AZIN1,BRPF3,BTBD7,CAD,CAMSAP2,CASC3,CCNB1IP1,CD48,CDH8,CEP250,CEP295,CFTR,CIPC,CNOT1,COL1A1,CYP1A1,DCN,DDX10,DDX11,DDX47,DDX58,EIF2S3,EIF3A,EP300,ERV3-1,ESRP2,FAM83G,FANCB,FBXO10,FGD3,FNBP1L,GATA3,GCH1,GEMIN5,GIGYF2,GJC1,GRK5,HIVEP2,HOXA11,HOXC6,HSPB6,IKZF2,IL1A,JCAD,JPH1,KAT6B,KHDC4,KIAA0100,KIAA1549,KI…	151
Cancer,Organismal Injury and Abnormalities,Respiratory Disease	Lung cancer	8.4e-16		1.062	ABCC2,ABL2,ACTA2,ADGRF1,ADORA1,ADORA2A,ADRA1B,AGAP5 (includes others),AGFG2,AGTPBP1,AHCTF1,AJUBA,AKR1B10,AKR1B15,ALDH1A3,ANAPC1,ANGPTL4,ANKRD13B,ANKRD28,ANO2,ANTXR2,ANXA9,AOC2,ARFGEF1,ARHGAP5,ARID2,ATF3,ATR,ATRNL1,AXIN1,B2M,BCLAF1,BRCA1,CABLES1,CAMSAP1,CC2D1B,CCDC40,CCL5,CCNB1IP1,CD48,CDC6,CEACAM1,CEP120,CEP295,CIT,CLDN3,CLIP4,CLUH,CNOT1,COL1A1,COL3A1,COL4A5,CPAMD8,CPLANE1,CREB5,CSF3,CUL3,CYP1A1,…	276
Cancer,Hematological Disease,Immunological Disease,Organismal Injury and Abnormalities	T-cell malignant neoplasm	8.82e-16		-0.247	ABL2,ADORA1,ADORA2A,AIM2,ARID2,ATR,B2M,BCR,BRCA1,CEP120,COL1A1,COL1A2,COL3A1,DCN,DLG1,DUSP5,E2F2,ENG,EP300,EPAS1,FERMT2,FRMD4B,GADD45A,GATA2,GATA3,HIC1,IFI35,IFI44,IFI44L,IFI6,IFIT3,IFITM1,IKZF2,IL22RA1,IL2RB,IRF7,ISG15,ISG20,ITGA5,JAK3,KLF3,KMT2A,LRRC37A3 (includes others),MAFB,MAP2K3,MAP3K14,MED12,MERTK,MET,MGA,MGAT4A,MMP2,MOAP1,MSL2,MX1,MYOF,NEDD4L,NUP98,OAS1,OAS2,OASL,ODC1,PAK2,PDE4D,PGF,PIK3…	99
Cancer,Gastrointestinal Disease,Organismal Injury and Abnormalities	Pancreatobiliary tumor	9.71e-16		-1.159	ABTB2,ADAD2,ADAMTSL3,AGA,AGAP1,AGL,AIM2,AKAP13,ANKHD1/ANKHD1-EIF4EBP3,ANKRD17,ANKRD34A,ANTXR2,AOC2,AP1G1,AP4E1,ARFGEF2,ARHGEF7,ARID2,ASAP1,ATG2A,ATR,ATRNL1,AXIN1,AZGP1,BAAT,BCR,BICC1,BPTF,BRCA1,BRPF3,C15orf39,CAD,CAMKK1,CAMSAP2,CAPN7,CARD19,CASD1,CC2D1B,CCDC30,CCN3,CCNB1IP1,CDAN1,CDH8,CELSR3,CEP295,CEP95,CFTR,CHERP,CIPC,CIT,CLASP1,CLUH,CMPK2,CNNM1,CNOT1,COL1A1,COL1A2,COL4A5,CPLANE1,CXCL5,CYP1A1,D…	315
Cancer,Organismal Injury and Abnormalities	Intrathoracic malignant tumor	1.14e-15		0.866	ABCC2,ABL2,ACTA2,ADGRF1,ADORA1,ADORA2A,ADRA1B,AGAP5 (includes others),AGFG2,AGTPBP1,AHCTF1,AJUBA,AKR1B10,AKR1B15,ALDH1A3,ANAPC1,ANGPTL4,ANKRD13B,ANKRD28,ANO2,ANTXR2,ANXA9,AOC2,ARFGEF1,ARHGAP5,ARID2,ATF3,ATR,ATRNL1,AXIN1,B2M,BCLAF1,BRCA1,CABLES1,CAMSAP1,CC2D1B,CCDC40,CCL5,CCNB1IP1,CD48,CDC6,CEACAM1,CEP120,CEP295,CIT,CLDN3,CLIP4,CLUH,CNOT1,COL1A1,COL3A1,COL4A5,CPAMD8,CPLANE1,CREB5,CSF3,CUL3,CYP1A1,…	277
Cancer,Endocrine System Disorders,Gastrointestinal Disease,Organismal Injury and Abnormalities	Pancreatic tumor	2.01e-15		-0.88	ABTB2,ADAD2,ADAMTSL3,AGAP1,AGL,AIM2,AKAP13,ANKHD1/ANKHD1-EIF4EBP3,ANKRD34A,AOC2,AP1G1,AP4E1,ARFGEF2,ARHGEF7,ARID2,ASAP1,ATG2A,ATR,ATRNL1,AZGP1,BICC1,BRCA1,BRPF3,CAD,CAMSAP2,CAPN7,CARD19,CASD1,CC2D1B,CCDC30,CCN3,CCNB1IP1,CDAN1,CDH8,CELSR3,CEP295,CEP95,CFTR,CHERP,CIPC,CIT,CLASP1,CLUH,CMPK2,CNNM1,CNOT1,COL1A1,COL1A2,CPLANE1,DAPK1,DCTN4,DDX58,DGKD,DHX38,DHX58,DHX9,DIP2B,DLG1,DNAAF1,DNAH11,DNAH2,DNAH5…	283
Cancer,Organismal Injury and Abnormalities,Reproductive System Disease	Breast cancer	2.58e-15		-0.319	ABCC2,ABL2,ABLIM1,ACTA2,ADRA1B,ADRB1,AGTPBP1,AIM2,AJUBA,AKAP13,ALDH1A3,ALOX12B,ANKRD18B,ANKRD31,ANXA9,ARFGEF1,ARHGAP45,ARHGAP8/PRR5-ARHGAP8,ARHGEF5,ARHGEF7,ARID2,ATF3,ATG2A,ATR,B3GALT5,BCR,BPTF,BRCA1,BRPF1,C19orf18,C2CD4D,CCDC125,CCDC30,CCNT1,CD48,CD68,CDC25A,CDC6,CEP250,CFTR,CIT,CLDN3,CMPK2,CNNM1,COL1A1,COL1A2,CPAMD8,CPLANE1,CSF3,CYP1A1,CYP26A1,DAPK1,DCN,DDHD1,DDIT4,DDX11,DHX58,DNAAF1,DNAH11,DNA…	254
Cancer,Hematological Disease,Immunological Disease,Organismal Injury and Abnormalities	Non-Hodgkin lymphoma	3.29e-15		0.104	ABL2,ADAMTSL3,ADORA1,ADORA2A,AIM2,ARHGAP42,ATF3,B2M,BCLAF1,BICC1,BIRC3,BRCA1,CAD,CD48,CD68,CEP120,CEP250,CEP350,CNOT1,COL1A1,COL1A2,COL3A1,COL4A5,CPSF7,CTSL,DAPK1,DCN,DDX10,DDX58,DGKD,DIAPH1,DLG1,DNAH5,DST,DUSP5,E2F2,ENG,EP300,EPAS1,FANCB,FERMT2,GADD45A,GATA3,GSE1,HIC1,HSF4,IFI35,IFI44,IFI44L,IFI6,IFIT3,IFITM1,IL22RA1,IL2RB,IRF7,ISG15,ISG20,ITGA5,ITGB3,JAK3,KAT6A,KIAA0100,KMT2A,LIMK1,LRRC37A3 (in…	154
Infectious Diseases	Replication of virus	8.12e-15	Decreased	-5.359	ADRA1B,AGTRAP,AKAP13,ATR,B2M,BIRC3,BST2,CAD,CCL5,CCNT1,CD48,CEACAM1,CIT,CLDN3,CLSTN3,CLUH,CNNM1,CYP1A1,DDX58,DGCR8,DHRS2,DHX9,DLG1,E2F2,EIF2AK2,EIF3A,EPAS1,FCGR1A,GLYR1,GRK5,HSF4,IFI27,IFI6,IFIH1,IFIT1,IFITM1,IFITM3,IL18,IL1A,IRF7,IRF9,ISG15,ISG20,KANSL1,KPNB1,LARP1,LIMK1,LY6E,MAP2K3,MX1,MX2,NUP214,NUP98,OAS1,OAS3,OASL,PAK2,PARP12,PLAAT4,POLA1,POLR2A,PPM1M,PRPF8,RAB11FIP1,RSAD2,SFPQ,SMURF1,SOCS1,…	87
Cancer,Organismal Injury and Abnormalities,Reproductive System Disease	Breast carcinoma	8.14e-15		-0.354	ABCC2,ABL2,ABLIM1,ACTA2,ADRA1B,AGTPBP1,AIM2,AJUBA,ALOX12B,ANKRD18B,ANKRD31,ANXA9,ARFGEF1,ARHGEF7,ARID2,ATG2A,ATR,BCR,BPTF,BRCA1,BRPF1,C19orf18,C2CD4D,CCDC125,CCDC30,CCNT1,CD48,CDC25A,CDC6,CFTR,CIT,CNNM1,COL1A2,CPAMD8,CPLANE1,CYP26A1,DAPK1,DCN,DDHD1,DDX11,DHX58,DNAAF1,DNAH11,DNAH5,DND1,DOCK3,DOT1L,DST,EIF4A2,EIF4B,ELF3,ELOVL7,EP300,ERCC6L,EVPL,FERMT2,FNBP1L,FOSL2,GATA3,GINS4,GLYR1,GREM1,GRIN2D,GTF…	196
Infectious Diseases	Viral Infection	1.21e-14	Decreased	-7.594	ABCC2,ACP3,ACTA2,ADORA1,ADORA2A,ADRA1B,ADRB1,AGTRAP,AHCTF1,AKAP13,ANAPC2,ATR,B2M,BCLAF1,BCR,BIRC3,BRCA1,BST2,CAD,CARD16,CCL5,CCNT1,CD48,CEACAM1,CFTR,CIT,CLDN3,CLIP3,CLSTN3,CLUH,CNNM1,COL3A1,CTSL,CXCL5,CYP1A1,DDX10,DDX58,DEFB103A/DEFB103B,DGCR8,DHRS2,DHX58,DHX9,DIAPH1,DLG1,E2F2,EIF2AK2,EIF3A,ENC1,EP300,EPAS1,F3,FBXW11,FCGR1A,FRS2,GABRE,GINS4,GLYR1,GRIN2D,GRK5,HAVCR1,HEATR1,HIP1R,HSF4,IFI27,IFI35,I…	193
Cancer,Organismal Injury and Abnormalities,Respiratory Disease	Lung carcinoma	3.66e-14		0.597	ABCC2,ABL2,ACTA2,ADORA1,ADORA2A,ADRA1B,AGAP5 (includes others),AGFG2,AGTPBP1,AHCTF1,AJUBA,AKR1B10,AKR1B15,ALDH1A3,ANAPC1,ANKRD13B,ANKRD28,ANO2,ANTXR2,ANXA9,AOC2,ARFGEF1,ARHGAP5,ARID2,ATR,ATRNL1,AXIN1,B2M,BCLAF1,BRCA1,CABLES1,CAMSAP1,CC2D1B,CCDC40,CCNB1IP1,CD48,CDC6,CEACAM1,CEP120,CEP295,CIT,CLDN3,CLIP4,CLUH,CNOT1,COL1A1,COL3A1,COL4A5,CPAMD8,CPLANE1,CREB5,CUL3,CYP26A1,DAGLA,DCN,DDX11,DDX42,DGCR8,D…	254
Infectious Diseases	Replication of RNA virus	5.64e-14	Decreased	-5.386	ADRA1B,AGTRAP,AKAP13,ATR,B2M,BST2,CAD,CCL5,CCNT1,CD48,CEACAM1,CIT,CLDN3,CLSTN3,CLUH,CNNM1,CYP1A1,DDX58,DGCR8,DHRS2,DHX9,DLG1,EIF2AK2,EIF3A,EPAS1,FCGR1A,GLYR1,GRK5,HSF4,IFI27,IFI6,IFIH1,IFIT1,IFITM1,IFITM3,IL18,IL1A,IRF7,IRF9,ISG15,ISG20,KANSL1,KPNB1,LARP1,LIMK1,LY6E,MAP2K3,MX1,NUP214,NUP98,OAS1,OAS3,OASL,PAK2,PARP12,PLAAT4,POLR2A,PRPF8,RAB11FIP1,RSAD2,SFPQ,SMURF1,SOCS1,SP110,STAT1,STING1,SUPT6H,T…	79
Cancer,Organismal Injury and Abnormalities,Renal and Urological Disease	Bladder carcinoma	1.03e-13			ACP3,ADAMTS16,ADAMTSL3,AGFG2,AGL,AGTPBP1,AJUBA,AKAP13,ALOX12B,ANKRD34A,ARHGAP5,ATG2A,ATP13A3,ATR,ATXN2L,BCLAF1,BCR,BRCA1,BTBD7,CCDC40,CD48,CDC6,CELF5,CELSR3,CEP152,CEP350,CLASP1,CLIP3,COL1A2,CRELD1,DAGLA,DCN,DDX10,DDX21,DHX9,DLG1,DLX3,DNAH5,DNAJC6,DOT1L,DST,EIF4A2,ELF3,ELF4,EP300,EP400,EPB41,EPS8L2,EPSTI1,ESRP2,EXPH5,FAM83G,FERMT2,FGD3,FNBP4,FOSB,GATA3,GPR61,GRIN2D,HIP1R,HSPB6,IKZF2,INTS1,ITCH,JA…	141
Cancer,Organismal Injury and Abnormalities,Respiratory Disease	Non-small cell lung carcinoma	1.54e-13		1.154	ABCC2,ABL2,ACTA2,ADORA1,ADORA2A,ADRA1B,AGAP5 (includes others),AGFG2,AGTPBP1,AHCTF1,AJUBA,AKR1B10,AKR1B15,ALDH1A3,ANAPC1,ANKRD13B,ANKRD28,ANO2,ANXA9,AOC2,ARFGEF1,ARHGAP5,ARID2,ATR,ATRNL1,AXIN1,B2M,BCLAF1,BRCA1,CAMSAP1,CC2D1B,CCDC40,CCNB1IP1,CD48,CDC6,CEACAM1,CEP120,CEP295,CIT,CLDN3,CLIP4,CLUH,CNOT1,COL1A1,COL3A1,COL4A5,CPLANE1,CREB5,CUL3,CYP26A1,DAGLA,DCN,DDX11,DDX42,DGCR8,DIP2B,DNAH2,DNAH5,DOT1L…	225
Cell Signaling	Replication of viral replicon	1.6e-13	Decreased	-3.776	BST2,CCL5,EIF2AK2,IFI16,IFIT1,IFIT5,IFITM1,IFITM3,ISG15,ISG20,MX1,OAS1,OAS3,OASL,PARP10,PLSCR1,PPIB,RSAD2,SHFL,TNIP1,XPO1	21
Cancer,Organismal Injury and Abnormalities	Cancer of head	1.68e-13		0.538	ADAMTSL3,AGAP5 (includes others),ANKRD17,ARHGAP5,ARID2,ARMC5,ASAP1,ASB5,ATP13A3,ATRNL1,ATXN2L,AXIN1,AZIN1,BRPF3,BTBD7,CAD,CAMSAP2,CASC3,CCNB1IP1,CD48,CDH8,CEP250,CEP295,CFTR,CIPC,CNOT1,COL1A1,CYP1A1,DCN,DDX10,DDX11,DDX47,DDX58,EIF2S3,EIF3A,EP300,ERV3-1,ESRP2,FAM83G,FANCB,FBXO10,FGD3,FNBP1L,GATA3,GCH1,GEMIN5,GIGYF2,GJC1,GRK5,HIVEP2,HOXA11,HOXC6,HSPB6,IKZF2,IL1A,JCAD,JPH1,KAT6B,KDM4C,KHDC4,KIAA0100…	159
Cancer,Gastrointestinal Disease,Organismal Injury and Abnormalities	Upper gastrointestinal carcinoma	4.32e-13			ACMSD,ADAMTS16,ADAMTSL3,AGAP5 (includes others),AIM2,ANAPC1,ANKRD17,ANKRD36C,ANTXR2,ARFGEF2,ARHGAP5,ARID2,ARMC5,ASAP1,ASB5,ATP13A3,ATR,ATRNL1,ATXN2L,AXIN1,AZGP1,AZIN1,B2M,BRPF1,BRPF3,BTBD7,C1orf116,CAD,CAMSAP2,CASC3,CASD1,CCDC30,CCDC40,CCNB1IP1,CD48,CDAN1,CDC6,CDH8,CDV3,CEP250,CEP295,CEP350,CEP95,CFTR,CHERP,CIPC,CLSTN3,CNOT1,COL1A1,COL1A2,CPAMD8,CPLANE1,CYP1A1,CYP26A1,DAGLB,DAPK1,DCN,DDHD1,DDX10,…	285
Cancer,Organismal Injury and Abnormalities,Renal and Urological Disease	Bladder cancer	7.9e-13			ACP3,ADAMTS16,ADAMTSL3,AGFG2,AGL,AGTPBP1,AJUBA,AKAP13,ALOX12B,ANKRD34A,ARHGAP5,ATF3,ATG2A,ATP13A3,ATR,ATXN2L,BCLAF1,BCR,BIRC3,BRCA1,BTBD7,CCDC40,CD48,CDC6,CELF5,CELSR3,CEP152,CEP350,CLASP1,CLIP3,COL1A2,CRELD1,DAGLA,DCN,DDX10,DDX21,DHX9,DLG1,DLX3,DNAH5,DNAJC6,DOT1L,DST,EIF4A2,ELF3,ELF4,EP300,EP400,EPB41,EPS8L2,EPSTI1,ESRP2,EXPH5,FAM83G,FERMT2,FGD3,FNBP4,FOSB,GATA3,GPR61,GRIN2D,HIP1R,HSPB6,IKZF2,IN…	147
Cancer,Organismal Injury and Abnormalities,Respiratory Disease	Nonsquamous non-small cell lung carcinoma	1.47e-12		1.533	ABL2,ACTA2,ADRA1B,AGAP5 (includes others),AGFG2,AGTPBP1,AHCTF1,AJUBA,AKR1B15,ALDH1A3,ANAPC1,ANKRD13B,ANKRD28,ANO2,ANXA9,AOC2,ARFGEF1,ARID2,ATR,ATRNL1,AXIN1,B2M,BRCA1,CAMSAP1,CC2D1B,CCDC40,CCNB1IP1,CD48,CDC6,CEP120,CEP295,CIT,CLDN3,CLIP4,CLUH,CNOT1,COL1A1,COL3A1,COL4A5,CPLANE1,CREB5,CUL3,DAGLA,DCN,DDX11,DDX42,DGCR8,DIP2B,DNAH2,DNAH5,DOT1L,DPY19L3,DST,EIF4A2,ELF3,ENPP4,EP300,EP400,EPAS1,EPM2AIP1,EX…	187
Cancer,Hematological Disease,Immunological Disease,Organismal Injury and Abnormalities	T-cell non-Hodgkin lymphoma	1.85e-12		0.391	ABL2,ADORA1,ADORA2A,AIM2,BRCA1,CEP120,COL1A1,COL1A2,COL3A1,DCN,DUSP5,E2F2,ENG,EPAS1,FERMT2,GADD45A,GATA3,HIC1,IFI35,IFI44,IFI44L,IFI6,IFIT3,IFITM1,IL22RA1,IL2RB,IRF7,ISG15,ISG20,ITGA5,JAK3,MAFB,MAP2K3,MAP3K14,MERTK,MET,MGAT4A,MMP2,MOAP1,MX1,MYOF,NEDD4L,OAS1,OAS2,OASL,ODC1,PDE4D,PGF,PIK3CA,PIM1,PLAAT4,POLA1,POLE,PPAT,PTPN11,REL,RELB,RHOBTB3,RSAD2,SOCS1,SP100,SP110,SPARC,SPEN,SPIB,STAT1,STAT5B,TFAP…	74
Cancer,Organismal Injury and Abnormalities,Respiratory Disease	Development of lung tumor	3.26e-12		0.86	ABL2,ACTA2,ADRA1B,AGAP5 (includes others),AGFG2,AGTPBP1,AHCTF1,AJUBA,AKR1B15,ALDH1A3,ANAPC1,ANKRD13B,ANKRD28,ANO2,ANXA9,AOC2,ARFGEF1,ARID2,ATR,ATRNL1,AXIN1,B2M,BRCA1,CAMSAP1,CC2D1B,CCDC40,CCNB1IP1,CD48,CDC6,CEP120,CEP295,CIT,CLDN3,CLIP4,CLUH,CNOT1,COL1A1,COL3A1,COL4A5,CPLANE1,CREB5,CUL3,DAGLA,DCN,DDX11,DDX42,DGCR8,DIP2B,DNAH2,DNAH5,DOT1L,DPY19L3,DST,EIF4A2,ELF3,ENPP4,EP300,EP400,EPAS1,EPM2AIP1,EX…	187
Cancer,Organismal Injury and Abnormalities	Malignant neoplasm of retroperitoneum	3.36e-12		1	ABTB2,ADAD2,ADAMTSL3,ADORA1,ADORA2A,AGL,AIM2,AJUBA,AKAP13,ANKHD1/ANKHD1-EIF4EBP3,ANKRD34A,AOC2,AP1G1,AP4E1,ARFGEF2,ARHGAP5,ARHGEF7,ARID2,ASAP1,ATG2A,ATP13A3,ATR,ATRNL1,ATXN2L,AZGP1,B2M,BICC1,BRCA1,BRPF3,CAD,CAPN7,CARD19,CASD1,CC2D1B,CCN3,CCNB1IP1,CD68,CDAN1,CDC6,CDH8,CELSR3,CEP295,CEP95,CFTR,CHERP,CIT,CLIP3,CLUH,CMPK2,CNNM1,CNOT1,COL1A1,COL1A2,CPLANE1,CTSL,CYP1A1,DAPK1,DCN,DCTN4,DDX58,DGCR8,DHX35…	306
Cancer,Gastrointestinal Disease,Organismal Injury and Abnormalities	Upper gastrointestinal tract cancer	4.13e-12			ACMSD,ADAMTS16,ADAMTSL3,ADRA1B,ADRB1,AGAP5 (includes others),AIM2,ANAPC1,ANKRD17,ANKRD36C,ANTXR2,ARFGEF2,ARHGAP5,ARID2,ARMC5,ASAP1,ASB5,ATP13A3,ATR,ATRNL1,ATXN2L,AXIN1,AZGP1,AZIN1,B2M,BRCA1,BRPF1,BRPF3,BTBD7,C1orf116,CAD,CAMSAP2,CASC3,CASD1,CCDC30,CCDC40,CCNB1IP1,CD48,CDAN1,CDC6,CDH8,CDV3,CEP250,CEP295,CEP350,CEP95,CFTR,CHERP,CIPC,CLSTN3,CNOT1,COL1A1,COL1A2,CPAMD8,CPLANE1,CYP1A1,CYP26A1,DAGLB,DAP…	292
Cancer,Hematological Disease,Organismal Injury and Abnormalities	Mature T-cell or NK-cell neoplasm	4.46e-12			AIM2,ATR,CEP120,COL1A1,COL1A2,COL3A1,DUSP5,ENG,EPAS1,FERMT2,FRMD4B,GADD45A,GATA3,HIC1,IFI35,IFI44,IFI44L,IFI6,IFIT3,IFITM1,IL22RA1,IL2RB,IRF7,ISG15,ISG20,ITGA5,JAK3,KLF3,LPCAT2,MAFB,MAP2K3,MAP3K14,MED12,MERTK,MET,MGAT4A,MMP2,MOAP1,MX1,MYOF,NEDD4L,OAS1,OAS2,OASL,ODC1,PDE4D,PGF,PIK3CA,PLAAT4,POLA1,POU3F1,PTPN11,REL,RELB,RHOBTB3,RSAD2,SOCS1,SP100,SP110,SPARC,SPEN,SPIB,STAT1,STAT5B,TFAP2A,TIMP3,TJP1,…	74
Cancer,Organismal Injury and Abnormalities,Respiratory Disease	Lung adenocarcinoma	5e-12		1.533	ABL2,ACTA2,ADRA1B,AGAP5 (includes others),AGFG2,AGTPBP1,AHCTF1,AJUBA,AKR1B15,ALDH1A3,ANAPC1,ANKRD13B,ANKRD28,ANO2,ANXA9,AOC2,ARFGEF1,ARID2,ATR,ATRNL1,AXIN1,B2M,BRCA1,CAMSAP1,CC2D1B,CCDC40,CCNB1IP1,CD48,CDC6,CEP120,CEP295,CIT,CLDN3,CLIP4,CLUH,CNOT1,COL1A1,COL3A1,COL4A5,CPLANE1,CREB5,CUL3,DAGLA,DCN,DDX11,DDX42,DGCR8,DIP2B,DNAH2,DNAH5,DOT1L,DPY19L3,DST,EIF4A2,ELF3,ENPP4,EP300,EP400,EPAS1,EPM2AIP1,EX…	184
Cancer,Gastrointestinal Disease,Organismal Injury and Abnormalities	Upper gastrointestinal tract tumor	5.15e-12			ACMSD,ADAMTS16,ADAMTSL3,ADRA1B,ADRB1,AGAP5 (includes others),AIM2,ANAPC1,ANKRD17,ANKRD36C,ANTXR2,ARFGEF2,ARHGAP5,ARID2,ARMC5,ASAP1,ASB5,ATP13A3,ATR,ATRNL1,ATXN2L,AXIN1,AZGP1,AZIN1,B2M,BRCA1,BRPF1,BRPF3,BTBD7,C1orf116,CAD,CAMSAP2,CASC3,CASD1,CCDC30,CCDC40,CCNB1IP1,CD48,CDAN1,CDC6,CDH8,CDV3,CEP250,CEP295,CEP350,CEP95,CFTR,CHERP,CIPC,CLSTN3,CNOT1,COL1A1,COL1A2,CPAMD8,CPLANE1,CYP1A1,CYP26A1,DAGLB,DAP…	293
Cancer,Endocrine System Disorders,Organismal Injury and Abnormalities,Reproductive System Disease	Development of gonadal tumor	9.93e-12			ABCC2,ABHD12B,ACP3,ADAMTSL3,ADORA1,ADORA2A,AGL,AMH,ANAPC2,ANKRD31,ANKRD36C,ARHGAP44,ARHGEF26,ARID2,ASAP1,ATR,AZGP1,B2M,BCLAF1,BCR,BRCA1,BRPF3,CARD16,CASD1,CELSR3,CEP120,CEP152,CEP295,CLASP1,CLDN3,CLDN7,CLIP3,CLUH,CMTM4,CNOT1,COL1A2,COL3A1,CREB5,DCAF16,DDX42,DHX8,DIAPH1,DIP2B,DNAH11,DNAH2,DNAH5,DNAJC2,DOCK3,DST,DUSP5,EIF4A2,EIF5B,ELF3,EP300,EP400,EPAS1,EVPL,EXOC3L4,FAM234B,FARP1,FARP2,FBXO10,FGD3,…	169
Cancer,Endocrine System Disorders,Organismal Injury and Abnormalities,Reproductive System Disease	Ovarian adenocarcinoma	1.16e-11			ABCC2,ABHD12B,ACP3,ADAMTSL3,ADORA1,ADORA2A,AGL,ANAPC2,ANKRD31,ANKRD36C,ARHGAP44,ARHGEF26,ARID2,ASAP1,ATR,AZGP1,B2M,BCLAF1,BCR,BRCA1,BRPF3,CARD16,CASD1,CELSR3,CEP120,CEP152,CEP295,CLASP1,CLDN3,CLDN7,CLIP3,CLUH,CMTM4,CNOT1,COL1A2,COL3A1,CREB5,DCAF16,DDX42,DHX8,DIAPH1,DIP2B,DNAH11,DNAH2,DNAH5,DNAJC2,DOCK3,DST,DUSP5,EIF4A2,EIF5B,ELF3,EP300,EP400,EPAS1,EVPL,EXOC3L4,FAM234B,FARP1,FARP2,FBXO10,FGD3,FJX1…	168
Cancer,Hematological Disease,Immunological Disease,Organismal Injury and Abnormalities	Mature T-cell neoplasm	1.35e-11			AIM2,ATR,CEP120,COL1A1,COL1A2,COL3A1,DUSP5,ENG,EPAS1,FERMT2,FRMD4B,GADD45A,GATA3,HIC1,IFI35,IFI44,IFI44L,IFI6,IFIT3,IFITM1,IL22RA1,IL2RB,IRF7,ISG15,ISG20,ITGA5,JAK3,KLF3,MAFB,MAP2K3,MAP3K14,MED12,MERTK,MET,MGAT4A,MMP2,MOAP1,MX1,MYOF,NEDD4L,OAS1,OAS2,OASL,ODC1,PDE4D,PGF,PIK3CA,PLAAT4,POLA1,POU3F1,PTPN11,REL,RELB,RHOBTB3,RSAD2,SOCS1,SP100,SP110,SPARC,SPEN,SPIB,STAT1,STAT5B,TFAP2A,TIMP3,TJP1,TOX,TP5…	71
Cancer,Endocrine System Disorders,Organismal Injury and Abnormalities,Reproductive System Disease	Ovarian carcinoma	1.44e-11			ABCC2,ABHD12B,ACP3,ADAMTSL3,ADORA1,ADORA2A,AGL,ANAPC2,ANKRD31,ANKRD36C,ARHGAP44,ARHGEF26,ARID2,ASAP1,ATR,AZGP1,B2M,BCLAF1,BCR,BRCA1,BRPF3,CAD,CARD16,CASD1,CELSR3,CEP120,CEP152,CEP295,CLASP1,CLDN3,CLDN7,CLIP3,CLUH,CMTM4,CNOT1,COL1A2,COL3A1,CREB5,DCAF16,DDX42,DHX8,DIAPH1,DIP2B,DNAH11,DNAH2,DNAH5,DNAJC2,DOCK3,DST,DUSP5,DZIP3,EIF4A2,EIF5B,ELF3,EP300,EP400,EPAS1,EVPL,EXOC3L4,FAM234B,FARP1,FARP2,FBXO10…	175
Cancer,Endocrine System Disorders,Organismal Injury and Abnormalities,Reproductive System Disease	Gonadal tumor	2.36e-11		1.612	ABCC2,ABHD12B,ACP3,ADAMTSL3,ADORA1,ADORA2A,AGL,AMH,ANAPC2,ANKRD31,ANKRD36C,ARHGAP44,ARHGEF26,ARID2,ASAP1,ATR,AZGP1,B2M,BCLAF1,BCR,BRCA1,BRF1,BRPF3,CAD,CARD16,CASD1,CELSR3,CEP120,CEP152,CEP295,CHM,CLASP1,CLDN3,CLDN7,CLIC1,CLIP3,CLUH,CMTM4,CNOT1,COL1A2,COL3A1,CREB5,CSF3,DCAF16,DDX42,DHX8,DIAPH1,DIP2B,DNAH11,DNAH2,DNAH5,DNAJC2,DOCK3,DST,DUSP5,DZIP3,E2F2,EIF4A2,EIF5B,ELF3,ENG,EP300,EP400,EPAS1,EVPL,E…	199
Cell Signaling	Viral life cycle	2.49e-11	Decreased	-3.776	BST2,CCL5,EIF2AK2,IFI16,IFIT1,IFIT5,IFITM1,IFITM3,ISG15,ISG20,MX1,NEDD4L,NUP155,NUP210,NUP214,NUP50,NUP98,OAS1,OAS3,OASL,PARP10,PLSCR1,PPIB,RCC1,RSAD2,SHFL,TNIP1,TP53,XPO1	29
Cell Death and Survival	Apoptosis	2.54e-11		0.869	AAMDC,ABL2,ACACA,ADORA1,ADORA2A,ADRA1B,ADRB1,AGA,AHCTF1,AIM2,AKAP13,AKR1B10,ALDH1A3,AMH,ANGPTL4,ANTXR2,APOL6,ARHGEF26,ARHGEF5,ARHGEF7,ATF3,ATR,AXIN1,B2M,B3GALT5,BACH1,BCLAF1,BCR,BHLHE41,BIRC3,BRCA1,BRF1,CABLES1,CCL5,CCN3,CCNT1,CD48,CDC25A,CDC6,CDK11A,CEACAM1,CFTR,CHM,CIDEB,CIT,CLASP1,CLDN7,CLEC11A,CLIP3,COL1A1,CRELD1,CSF3,CTSL,CUL3,CYP26A1,DAPK1,DCN,DDIT4,DDN,DDX11,DDX42,DDX47,DDX58,DGCR8,DGKD,DH…	283
Organismal Survival	Morbidity or mortality	3.08e-11	Increased	8.758	ABL2,ACACA,ACTA2,ADORA1,ADORA2A,ADRA1B,ADRB1,AGA,AGL,AHCTF1,AIM2,AKAP13,ALDH1A3,ALOX12B,ANAPC2,ANGPTL4,ANKRD17,ANTXR2,AP1G1,APLP1,ARHGAP5,ATF3,ATR,ATXN1L,AXIN1,B2M,B3GALT5,BCLAF1,BCR,BICC1,BIRC3,BPTF,BRCA1,BRPF1,BTBD7,CCN3,CD68,CDC25A,CDK11A,CEACAM1,CELSR3,CEP120,CFTR,CHM,CIT,CLDN7,CLIP3,CLUH,COL3A1,CREB5,CRELD1,CSF3,CUL3,CXCL5,CYP1A1,CYP26A1,DCN,DDX11,DDX58,DGCR8,DGKD,DHX58,DHX9,DLG1,DLX3,DNAJC6…	264
Cancer,Organismal Injury and Abnormalities	Mixed neoplasia	3.71e-11			ADORA1,AGL,ALOX12B,ANAPC2,ANKRD31,ARFGEF1,ARHGAP44,ARHGEF26,ARID2,ASAP1,ATR,BCLAF1,BIRC3,BRCA1,CARD16,CASD1,CCDC40,CCNT1,CD48,CEP295,CFTR,CLDN3,CLIP3,CNNM1,COL1A2,COL3A1,DAPK1,DDHD1,DDX11,DDX42,DGCR8,DIP2B,DNAH11,DNAH5,DNAJC2,DOT1L,DST,DUSP5,EIF5B,ENG,EP300,EP400,EPAS1,EVPL,FARP2,FBXO10,FGD3,FJX1,FMNL2,FRK,GABRE,GPC1,GTF3C3,HBEGF,HEATR1,HIVEP2,IL22RA1,IL2RB,IRF7,IRX4,ITCH,KAT6B,LARP1,LETM1,LIMD1,…	161
Cancer,Organismal Injury and Abnormalities	Connective or soft tissue tumor	7.73e-11		0.181	ABL2,ACTA2,ADAMTSL3,ADRA1B,ADRB1,AHCTF1,ALDH1A3,ALOX12B,AMH,ANGPTL4,ANTXR2,ARFGEF1,ARFGEF2,ARID2,ASB5,ATRNL1,BPTF,BRCA1,CARD16,CCDC40,CCNT1,CD48,CDH8,CFTR,CHERP,CLDN3,CLUH,CNNM1,COL1A1,COL1A2,COL3A1,COL4A5,COL9A2,CPAMD8,CTSL,DAPK1,DCN,DDHD1,DDX11,DDX58,DGKD,DNAH5,DOCK3,DOT1L,DST,E2F2,ELN,ENG,EP300,FAM20A,FERMT2,FGD3,FMNL2,FOSL2,FRK,FRMD4B,GABRE,GPC1,GPM6A,GPRC5D,GSE1,GTF3C4,HELZ,HIPK2,IFI35,IFI44…	166
Cancer,Endocrine System Disorders,Organismal Injury and Abnormalities,Reproductive System Disease	Ovarian tumor	7.78e-11		1.32	ABCC2,ABHD12B,ACP3,ADAMTSL3,ADORA1,ADORA2A,AGL,ANAPC2,ANKRD31,ANKRD36C,ARHGAP44,ARHGEF26,ARID2,ASAP1,ATR,AZGP1,B2M,BCLAF1,BCR,BRCA1,BRF1,BRPF3,CAD,CARD16,CASD1,CELSR3,CEP120,CEP152,CEP295,CLASP1,CLDN3,CLDN7,CLIC1,CLIP3,CLUH,CMTM4,CNOT1,COL1A2,COL3A1,CREB5,CSF3,DCAF16,DDX42,DHX8,DIAPH1,DIP2B,DNAH11,DNAH2,DNAH5,DNAJC2,DOCK3,DST,DUSP5,DZIP3,E2F2,EIF4A2,EIF5B,ELF3,ENG,EP300,EP400,EPAS1,EVPL,EXOC3L4,F…	191
Dermatological Diseases and Conditions,Immunological Disease,Organismal Injury and Abnormalities	Pemphigus foliaceus	9.23e-11			AIM2,DUSP5,EIF2AK2,IFI27,IFI44,IFI44L,IFI6,IFIH1,IFIT1,IFIT3,ISG15,LAMP3,MX1,OAS1,OAS2,OASL,REXO5,RSAD2,STAT1,WARS1	20
Organismal Survival	Organismal death	9.44e-11	Increased	8.802	ABL2,ACACA,ACTA2,ADORA1,ADORA2A,ADRA1B,ADRB1,AGA,AGL,AHCTF1,AIM2,AKAP13,ALDH1A3,ALOX12B,ANAPC2,ANGPTL4,ANKRD17,ANTXR2,AP1G1,APLP1,ARHGAP5,ATF3,ATR,ATXN1L,AXIN1,B2M,B3GALT5,BCLAF1,BCR,BICC1,BIRC3,BPTF,BRCA1,BRPF1,BTBD7,CCN3,CD68,CDC25A,CDK11A,CEACAM1,CELSR3,CEP120,CFTR,CHM,CIT,CLDN7,CLIP3,CLUH,COL3A1,CREB5,CRELD1,CSF3,CUL3,CXCL5,CYP1A1,CYP26A1,DCN,DDX11,DDX58,DGCR8,DGKD,DHX58,DHX9,DLG1,DLX3,DNAJC6…	259
Connective Tissue Disorders,Immunological Disease,Inflammatory Disease,Organismal Injury and Abnormalities,Skeletal and Muscular Disorders	Systemic lupus erythematosus	1.03e-10			AIM2,BST2,CEACAM1,DAPK1,DDX58,DHX58,DIAPH1,DUSP5,E2F2,EIF2AK2,EPSTI1,GATA3,HAVCR1,IFI16,IFI27,IFI44,IFI44L,IFI6,IFIH1,IFIT1,IFIT3,IFITM1,IL18,IL2RB,IRF7,ISG15,ISG20,JAG2,LAMP3,LY6E,MERTK,MSH5,MT2A,MX1,MYO6,NF2,OAS1,OAS2,OASL,OPA1,PARP12,PARP9,PDP2,PHRF1,PLSCR1,PPAT,PTPN11,RABGGTB,RDH8,REXO5,RSAD2,SOCS1,STAT1,TAP1,TNFRSF9,TNIP1,UNC13D,USP18,WARS1	59
Antimicrobial Response,Inflammatory Response	Antimicrobial response	1.45e-10	Increased	2.412	ACTA2,AIM2,ANKRD17,BIRC3,BST2,CCL5,DDIT4,DDX21,DDX58,DEFB103A/DEFB103B,DHX58,DHX9,EIF2AK2,FCGR1A,GATA3,IFI16,IFI27,IFI44,IFI44L,IFI6,IFIH1,IFIT1,IFIT3,IFIT5,IFITM1,IFITM3,IRF7,IRGM,ISG15,ISG20,ITCH,MAP3K14,MECOM,MX1,MX2,MYO1F,OAS1,OAS2,OAS3,OASL,ODC1,PARP9,PI3,PLAAT4,PLAC8,PLSCR1,RSAD2,SELENOK,SHFL,SIN3A,SLFN13,SOCS1,STAT1,STING1,TNFRSF9,TP53,UNC13D,ZCCHC3	58
Connective Tissue Disorders,Immunological Disease,Inflammatory Disease,Organismal Injury and Abnormalities,Skeletal and Muscular Disorders	Lupus erythematosus	1.83e-10			AIM2,BST2,CEACAM1,CTSL,DAPK1,DDX58,DHX58,DIAPH1,DUSP5,E2F2,EIF2AK2,EPSTI1,GATA3,HAVCR1,IFI16,IFI27,IFI44,IFI44L,IFI6,IFIH1,IFIT1,IFIT3,IFITM1,IL18,IL2RB,IRF7,ISG15,ISG20,JAG2,LAMP3,LY6E,MERTK,MSH5,MT2A,MX1,MYO6,NF2,OAS1,OAS2,OASL,OPA1,PARP12,PARP9,PDP2,PHRF1,PLSCR1,PPAT,PTPN11,RABGGTB,RDH8,REXO5,RSAD2,SOCS1,STAT1,TAP1,TNFRSF9,TNIP1,UNC13D,USP18,WARS1	60
Gene Expression	Expression of RNA	1.86e-10		-1.093	AAMDC,ABLIM1,ACTA2,ADORA2A,ADRB1,AHCTF1,AJUBA,ALOX12B,AMH,ANKRD2,APLP1,ARID2,ATF3,ATXN1L,AXIN1,BACH1,BCLAF1,BCR,BEND3,BHLHE41,BPTF,BRCA1,BRF1,BRPF1,BST2,CAMK2N1,CBX6,CC2D1B,CCL5,CCN3,CCNT1,CIPC,CNOT1,COL1A1,CREB5,CSF3,CUL3,DAPK1,DCN,DDN,DDX21,DDX58,DHX58,DHX9,DIAPH1,DLG1,DNAJC2,DOT1L,DUSP5,E2F2,EIF2AK2,EIF2S3,EIF4A2,EIF4B,EIF4ENIF1,EIF5B,ELF3,ELF4,ENC1,ENG,EP300,EPAS1,EPB41L4B,FBXW11,FCGR1A,FOSB,…	246
Infectious Diseases	Tuberculosis	2.31e-10			FOXP4,GABRE,GRIN2D,IFI16,IFI35,IFI44,IFI44L,IFI6,IFIH1,IFIT1,IFIT3,IFIT5,IFITM1,IFITM3,IL18,IL2RB,IRF7,ITGB3,MX1,MYBL1,NRG1,OAS1,OAS2,OAS3,POLA1,PSMB8,PSMB9,RHEBL1,SOCS1,SP110,STAT1,TAP1,TMOD2,ZNF256	34
Cancer,Organismal Injury and Abnormalities	Serous adenocarcinoma	2.58e-10			ABCC2,ABHD12B,ACP3,ACTG2,ADAMTSL3,ADORA2A,ANKRD36C,ARID2,ATR,AZGP1,B2M,BCLAF1,BCR,BRCA1,BRPF3,CARD16,CDC6,CELSR3,CEP120,CEP152,CIT,CLASP1,CLDN3,CLDN7,CLUH,CMTM4,CNOT1,COL3A1,CREB5,DCAF16,DHX8,DIAPH1,DIP2B,DNAH11,DNAH2,DNAH5,DOCK3,DST,EIF4A2,ELF3,EP300,EXOC3L4,F3,FAM234B,FARP1,FOSL2,GATA3,GPM6A,GSTM5,HOXA11,HSPB6,IFI44L,IFIH1,IL18,ISG15,JAG2,KDM4C,KNTC1,KRT7,KRT86,LAMP3,LRP8,LY6E,MAP3K21,MECOM,MET…	111
Cancer,Organismal Injury and Abnormalities	Ductal carcinoma	3.11e-10		-0.709	ABTB2,ACTA2,ADAD2,ADAMTSL3,AGA,AGL,AIM2,AKAP13,ANKHD1/ANKHD1-EIF4EBP3,ANKRD17,ANKRD34A,ANTXR2,ANXA9,AP1G1,AP4E1,ARFGEF1,ARFGEF2,ARHGEF7,ARID2,ASAP1,ATR,ATRNL1,AXIN1,AZGP1,BAAT,BICC1,BPTF,BRCA1,BRPF3,C15orf39,CAD,CAMKK1,CAPN7,CARD19,CASD1,CC2D1B,CCDC30,CCN3,CCNB1IP1,CD48,CDAN1,CDH8,CELSR3,CEP295,CFTR,CHERP,CIT,CLUH,CMPK2,CNNM1,CNOT1,COL1A1,COL1A2,COL4A5,CPAMD8,CPLANE1,CXCL5,DAPK1,DCTN4,DDHD1,DDX58…	260
Cancer,Hematological Disease,Immunological Disease,Organismal Injury and Abnormalities	B-cell neoplasm	3.32e-10	Increased	2.158	ABL2,ADAMTS16,ADAMTSL3,ADORA1,ADORA2A,ADRA1B,ADRB1,AGL,ALOX12B,ARHGAP42,ARID2,ATF3,ATR,ATRNL1,AXIN1,B2M,BCLAF1,BCR,BICC1,BIRC3,BRCA1,CAD,CCL5,CD48,CD68,CEP250,CEP350,CLDN14,CNOT1,COL1A1,COL1A2,COL3A1,COL4A5,CPSF7,CTSL,DAGLA,DAPK1,DDX10,DDX58,DGKD,DIAPH1,DLG1,DNAH5,DST,E2F2,ENC1,EP300,EPAS1,EPSTI1,FANCB,FRMD4B,GABRE,GRIN2D,GSE1,HSF4,IFIT3,IKZF2,IL2RB,IL31RA,IL5,ITGB3,JAK3,KAT6A,KIAA0100,KLF3,KMT2A…	160
Gene Expression	Transcription of RNA	4.07e-10		-1.673	AAMDC,ABLIM1,ACTA2,ADORA2A,ADRB1,AHCTF1,AJUBA,ANKRD2,ARID2,ATF3,ATXN1L,AXIN1,BACH1,BCLAF1,BCR,BEND3,BHLHE41,BPTF,BRCA1,BRF1,BRPF1,BST2,CBX6,CC2D1B,CCNT1,CIPC,CNOT1,COL1A1,CREB5,CSF3,CUL3,DCN,DDN,DDX21,DDX58,DHX9,DLG1,DNAJC2,DOT1L,DUSP5,E2F2,EIF2AK2,ELF3,ELF4,ENG,EP300,EPAS1,FBXW11,FCGR1A,FOSB,FOSL2,FOXJ3,FOXP4,FRK,GADD45A,GATA2,GATA3,GREM1,GRHL2,GTF3C4,HEATR1,HELZ2,HIC1,HIPK2,HIVEP2,HNRNPAB,HOXA1…	203
Cancer,Endocrine System Disorders,Organismal Injury and Abnormalities,Reproductive System Disease	Ovarian cancer	5.1e-10			ABCC2,ABHD12B,ACP3,ADAMTSL3,ADORA1,ADORA2A,AGL,ANAPC2,ANKRD31,ANKRD36C,ARHGAP44,ARHGEF26,ARID2,ASAP1,ATR,AZGP1,B2M,BCLAF1,BCR,BRCA1,BRPF3,CAD,CARD16,CASD1,CELSR3,CEP120,CEP152,CEP295,CLASP1,CLDN3,CLDN7,CLIC1,CLIP3,CLUH,CMTM4,CNOT1,COL1A2,COL3A1,CREB5,CSF3,DCAF16,DDX42,DHX8,DIAPH1,DIP2B,DNAH11,DNAH2,DNAH5,DNAJC2,DOCK3,DST,DUSP5,DZIP3,E2F2,EIF4A2,EIF5B,ELF3,EP300,EP400,EPAS1,EVPL,EXOC3L4,FAM234B,FA…	184
Cancer,Organismal Injury and Abnormalities	Liquid tumor	6.25e-10		-1.314	ABCC2,ABHD12B,ABL2,ADAMTS16,ADORA1,ADORA2A,ADRA1B,ADRB1,AGAP5 (includes others),AGL,AKAP13,ALOX12B,ANAPC1,ANGPTL4,ANKHD1/ANKHD1-EIF4EBP3,ANKRD18B,ANKRD22,ANO2,APLP1,ARHGEF5,ARID2,ATR,ATRNL1,AZIN1,B2M,BAAT,BCLAF1,BCR,BIRC3,BRCA1,BRPF1,CAMK2N1,CCDC40,CCL5,CD48,CD68,CDC25A,CDH8,CELSR3,CIPC,CLASP1,CLDN14,CLDN7,CLUH,COL1A1,COL1A2,COL4A5,CPLANE1,CSF3,CYP1A1,CYP26A1,DAGLA,DAPK1,DDX11,DDX58,DHX9,DLG1,DNA…	229
Cancer,Hematological Disease,Immunological Disease,Organismal Injury and Abnormalities	Leukemia	8.55e-10		-1.556	ABCC2,ABHD12B,ABL2,ADAMTS16,ADORA1,ADORA2A,ADRA1B,ADRB1,AGAP5 (includes others),AGL,AKAP13,ALOX12B,ANAPC1,ANGPTL4,ANKHD1/ANKHD1-EIF4EBP3,ANKRD18B,ANKRD22,ANO2,APLP1,ARHGEF5,ARID2,ATR,ATRNL1,AZIN1,B2M,BAAT,BCLAF1,BCR,BIRC3,BRCA1,BRPF1,CAMK2N1,CCDC40,CD48,CD68,CDH8,CELSR3,CLASP1,CLDN14,CLDN7,CLUH,COL1A1,COL1A2,COL4A5,CPLANE1,CSF3,CYP1A1,CYP26A1,DAGLA,DAPK1,DDX11,DDX58,DHX9,DLG1,DNAH11,DNAH2,DNAH5,D…	218
Infectious Diseases	Infection by RNA virus	1.02e-09	Decreased	-6.362	ABCC2,ACP3,ACTA2,ADORA1,ADORA2A,AHCTF1,AKAP13,ANAPC2,B2M,BCLAF1,BCR,BRCA1,CAD,CARD16,CCL5,CCNT1,CEACAM1,CFTR,CLIP3,CTSL,CXCL5,DDX10,DDX58,DHX9,DIAPH1,EIF2AK2,EIF3A,ENC1,EP300,EPAS1,FBXW11,FCGR1A,FRS2,GABRE,GINS4,GRIN2D,HAVCR1,HEATR1,HIP1R,IFI35,IFIH1,IFITM3,IL18,IL1A,IL2RB,IL5,ISG15,ISG20,KAT2A,KAT6A,KPNB1,LRRC8D,LTB4R,MAP3K14,MAP3K9,MAPK8IP2,MECOM,MERTK,MR1,MT2A,MTR,MYO1F,MYOF,NCOA6,NEDD4,NF2,NO…	110
Immunological Disease	Systemic autoimmune syndrome	1.67e-09		0.823	ACTA2,ADORA2A,AIM2,AKAP13,AKR1B10,ASAP1,B2M,BST2,CASC3,CCL5,CD68,CEACAM1,COL1A1,COL1A2,COL3A1,COL4A5,CSF3,CXCL5,DAPK1,DDX58,DHX58,DIAPH1,DLG1,DUSP5,E2F2,EIF2AK2,EPAS1,EPSTI1,FCGR1A,FOSB,GABRE,GATA3,GSDMC,HACD2,HAVCR1,HELZ2,HLA-F,IFI16,IFI27,IFI44,IFI44L,IFI6,IFIH1,IFIT1,IFIT3,IFITM1,IL18,IL2RB,IL5,IRF7,IRGM,ISG15,ISG20,ITGA5,ITIH4,JAG2,JAK3,KCNJ15,KDM4C,KLF3,LAMP3,LGALS3BP,LRP8,LTB,LY6E,MAFB,MAGI…	153
Infectious Diseases	Replication of Influenza A virus	1.7e-09	Decreased	-4.252	ADRA1B,AGTRAP,AKAP13,B2M,CAD,CD48,CIT,CLSTN3,CLUH,CNNM1,DDX58,DHRS2,EIF2AK2,EIF3A,GLYR1,GRK5,HSF4,IFITM1,IFITM3,IL1A,ISG15,KANSL1,KPNB1,LARP1,LIMK1,MAP2K3,MX1,NUP214,NUP98,OAS3,PAK2,POLR2A,PRPF8,RSAD2,SFPQ,STAT1,SUPT6H,TAP1,TP53,TSSK6,UBA7,UBQLN4,XPO1,ZBTB2	44
Infectious Diseases	Infection of cells	2.21e-09	Decreased	-6.413	ACP3,AHCTF1,AKAP13,ANAPC2,B2M,BCLAF1,BCR,BRCA1,CAD,CARD16,CCL5,CCNT1,CLIP3,CTSL,DDX10,DDX58,DEFB103A/DEFB103B,DHX9,DIAPH1,EIF2AK2,EIF3A,ENC1,EP300,EPAS1,F3,FBXW11,FRS2,GINS4,HAVCR1,HEATR1,HIP1R,IFI35,IFITM1,IFITM3,IL18,IL1A,ISG20,KAT2A,KAT6A,KPNB1,LRRC8D,LTB4R,MAP3K14,MAP3K9,MAPK8IP2,MECOM,MERTK,MR1,MT2A,MX1,MYO1F,MYOF,NCOA6,NEDD4,NF2,NOP56,NUP155,NUP214,NUP50,NUP98,OCLN,PARP9,PDZD8,PHF3,PKD1L2,P…	96
Cellular Assembly and Organization,Cellular Function and Maintenance	Organization of cytoskeleton	2.23e-09	Decreased	-3.999	ABL2,ABLIM1,ACACA,ADGRF1,ADORA2A,ADRA1B,AGTPBP1,AJUBA,ANAPC2,ANGPTL4,AP1G1,ARFGEF1,ARHGAP44,ARHGAP5,ARHGAP8/PRR5-ARHGAP8,ARHGEF5,ARHGEF7,ASAP1,ATF3,AXIN1,BCR,BRCA1,BST2,CAMSAP1,CAMSAP2,CCL5,CCN3,CDC6,CEACAM1,CELSR3,CEP120,CEP250,CEP350,CEP83,CGN,CIT,CLASP1,CLIP3,COL1A1,CPLANE1,DAPK1,DIAPH1,DLG1,DNAAF1,DNAH5,DST,DYNLT1,EML4,ENC1,ENG,EP300,EPB41,EPB41L2,EPB41L5,EPS8L2,F3,FARP1,FARP2,FCGR1A,FGD3,FMN…	164
Cancer,Organismal Injury and Abnormalities	Connective tissue tumor	2.33e-09		0.181	ABL2,ACTA2,ADAMTSL3,AHCTF1,ALDH1A3,ALOX12B,ANGPTL4,ANTXR2,ARFGEF1,ARID2,BPTF,BRCA1,CARD16,CCDC40,CCNT1,CD48,CDH8,CFTR,CHERP,CLDN3,CNNM1,COL1A1,COL1A2,COL3A1,COL4A5,COL9A2,CPAMD8,CTSL,DAPK1,DCN,DDHD1,DDX11,DDX58,DGKD,DNAH5,DOCK3,DOT1L,DST,E2F2,ELN,ENG,FAM20A,FGD3,FMNL2,FOSL2,FRK,GABRE,GPC1,GPRC5D,GSE1,GTF3C4,HIPK2,IFI35,IL18,IL2RB,IL5,IRF7,KLF3,LARP1,LETM1,LGALS3BP,LIMD1,LIMK1,LRPPRC,MED12,MERTK,M…	142
Cancer,Organismal Injury and Abnormalities,Renal and Urological Disease	Renal tumor	4.15e-09		1.463	ADORA1,ADORA2A,AJUBA,ANKHD1/ANKHD1-EIF4EBP3,ARHGAP5,ARHGEF7,ARID2,ASAP1,ATP13A3,ATR,ATXN2L,B2M,BRCA1,BRF1,BRPF3,CAD,CD68,CDC6,CEP95,CIT,CLIP3,CTSL,CYP1A1,DAPK1,DCN,DDX58,DGCR8,DHX35,DST,EIF4A2,ENG,EP300,EPAS1,FCGR1A,FNBP1L,GABRE,GPM6A,GRIN2D,HAVCR1,HSPB6,IFI16,IFIT3,IFITM1,IL18,IL2RB,IL5,INTS1,ITGA5,ITGB3,KCNJ15,KIAA1549,KIF14,KLF3,KRT7,KRT80,LMTK2,MAGI1,MAP2K3,MASP2,MAST4,MCM2,MECOM,MED12,MERTK,…	139
Gene Expression	Transcription	4.24e-09		-1.633	AAMDC,ABLIM1,ACTA2,ADORA2A,ADRB1,AHCTF1,AJUBA,AKAP13,ALOX12B,AMH,ANKRD2,ARID2,ATF3,ATXN1L,AXIN1,BACH1,BCLAF1,BCR,BEND3,BHLHE41,BPTF,BRCA1,BRF1,BRPF1,BST2,CAMK2N1,CBX6,CC2D1B,CCL5,CCN3,CCNT1,CIPC,CNOT1,COL1A1,CREB5,CSF3,CUL3,DCN,DDN,DDX21,DDX58,DHX9,DLG1,DNAJC2,DOT1L,DUSP5,E2F2,EIF2AK2,ELF3,ELF4,ENG,EP300,EPAS1,EPB41L4B,FBXW11,FCGR1A,FOSB,FOSL2,FOXJ3,FOXP4,FRK,GADD45A,GAS2L1,GATA2,GATA3,GREM1,GRHL…	228
Dermatological Diseases and Conditions,Immunological Disease,Organismal Injury and Abnormalities	Pemphigus	5.05e-09			AIM2,DUSP5,EIF2AK2,FCGR1A,IFI27,IFI44,IFI44L,IFI6,IFIH1,IFIT1,IFIT3,ISG15,ITGB3,LAMP3,MLH3,MX1,OAS1,OAS2,OASL,PPAT,REXO5,RSAD2,SPARC,STAT1,WARS1	25
Cancer,Hematological Disease,Immunological Disease,Organismal Injury and Abnormalities	Mature B-cell neoplasm	6.19e-09			ADAMTS16,ADAMTSL3,ADRA1B,ADRB1,AGL,ALOX12B,ARHGAP42,ARID2,ATF3,ATR,ATRNL1,AXIN1,B2M,BCLAF1,BICC1,BIRC3,BRCA1,CAD,CCL5,CD48,CD68,CEP250,CEP350,CLDN14,CNOT1,COL1A1,COL1A2,COL3A1,COL4A5,CPSF7,CTSL,DAGLA,DAPK1,DDX10,DDX58,DGKD,DIAPH1,DLG1,DNAH5,DST,E2F2,ENC1,EP300,EPAS1,EPSTI1,FANCB,FRMD4B,GABRE,GRIN2D,GSE1,HSF4,IFIT3,IL2RB,IL31RA,IL5,ITGB3,JAK3,KAT6A,KIAA0100,KLF3,KMT2A,LRRC37A3 (includes others),LY…	144
Cell Death and Survival	Apoptosis of tumor cell lines	6.72e-09		1.195	ABL2,ACACA,ADORA1,ADORA2A,AGA,AIM2,AKR1B10,AMH,ATF3,ATR,AXIN1,B2M,B3GALT5,BACH1,BCLAF1,BCR,BIRC3,BRCA1,CD48,CDC25A,CDC6,CEACAM1,CIDEB,CLASP1,COL1A1,CYP26A1,DAPK1,DDIT4,DDX58,DGKD,DHX9,E2F2,EIF2AK2,EIF4B,ENC1,ENG,EP300,EPAS1,FBXO32,FCGR1A,FOSB,GADD45A,GRHL2,GRK5,HBEGF,HIC1,HIPK2,HOXA11,HOXC6,HSH2D,IFI16,IFI6,IGF2BP2,IL18,IL1A,ITCH,ITGB3,JAK3,KIF14,KMT2A,KPNB1,LGALS3BP,MAP2K3,MAP3K14,MAP3K9,MDC1,MD…	148
Cancer,Organismal Injury and Abnormalities,Renal and Urological Disease	Renal cancer	9.73e-09		1.633	ADORA1,ADORA2A,AJUBA,ANKHD1/ANKHD1-EIF4EBP3,ARHGAP5,ARHGEF7,ARID2,ASAP1,ATP13A3,ATR,ATXN2L,B2M,BRCA1,BRPF3,CAD,CD68,CDC6,CEP95,CIT,CLIP3,CTSL,CYP1A1,DAPK1,DCN,DDX58,DGCR8,DHX35,DST,EIF4A2,ENG,EP300,FCGR1A,FNBP1L,GABRE,GPM6A,GRIN2D,HAVCR1,HSPB6,IFI16,IFIT3,IFITM1,IL18,IL2RB,IL5,INTS1,ITGA5,ITGB3,KCNJ15,KIAA1549,KIF14,KLF3,KRT7,KRT80,LMTK2,MAGI1,MAP2K3,MASP2,MAST4,MCM2,MECOM,MED12,MERTK,MET,MITF,MM…	135
Cellular Assembly and Organization,Cellular Function and Maintenance	Microtubule dynamics	1.01e-08	Decreased	-3.651	ABL2,ABLIM1,ACACA,ADGRF1,ADORA2A,AGTPBP1,AJUBA,ANAPC2,ANGPTL4,AP1G1,ARFGEF1,ARHGAP44,ARHGAP5,ARHGAP8/PRR5-ARHGAP8,ARHGEF5,ARHGEF7,ASAP1,ATF3,AXIN1,BCR,BRCA1,BST2,CAMSAP1,CAMSAP2,CCL5,CCN3,CDC6,CEACAM1,CELSR3,CEP120,CEP250,CEP350,CEP83,CGN,CIT,CLASP1,CLIP3,COL1A1,CPLANE1,DAPK1,DIAPH1,DLG1,DNAAF1,DNAH5,DST,DYNLT1,EML4,ENC1,ENG,EP300,EPB41,EPS8L2,F3,FARP1,FARP2,FCGR1A,FGD3,FNBP1,FNBP1L,GAS2L1,GATA3,…	142
Cellular Assembly and Organization,Cellular Function and Maintenance	Organization of cytoplasm	1.3e-08	Decreased	-3.999	ABL2,ABLIM1,ACACA,ADGRF1,ADORA2A,ADRA1B,AGTPBP1,AJUBA,ANAPC2,ANGPTL4,AP1G1,ARFGEF1,ARFGEF2,ARHGAP44,ARHGAP5,ARHGAP8/PRR5-ARHGAP8,ARHGEF5,ARHGEF7,ASAP1,ATF3,AXIN1,BCR,BRCA1,BST2,CAMSAP1,CAMSAP2,CCL5,CCN3,CDC6,CEACAM1,CELSR3,CEP120,CEP250,CEP350,CEP83,CGN,CIT,CLASP1,CLIP3,CLUH,COL1A1,CPLANE1,DAPK1,DIAPH1,DLG1,DNAAF1,DNAH5,DST,DYNLT1,EML4,ENC1,ENG,EP300,EPAS1,EPB41,EPB41L2,EPB41L5,EPS8L2,EXOC8,F3,FA…	174
Cancer,Endocrine System Disorders,Gastrointestinal Disease,Organismal Injury and Abnormalities	Pancreatic cancer	1.42e-08			ABTB2,ADAD2,ADAMTSL3,AGL,AIM2,AKAP13,ANKHD1/ANKHD1-EIF4EBP3,ANKRD34A,AOC2,AP1G1,AP4E1,ARFGEF2,ARHGEF7,ARID2,ASAP1,ATG2A,ATR,ATRNL1,AZGP1,BICC1,BRCA1,BRPF3,CAD,CAPN7,CARD19,CASD1,CC2D1B,CCN3,CCNB1IP1,CDAN1,CDH8,CELSR3,CEP295,CFTR,CHERP,CIT,CLUH,CMPK2,CNNM1,CNOT1,COL1A1,COL1A2,CPLANE1,DAPK1,DCTN4,DDX58,DHX38,DHX58,DHX9,DIP2B,DLG1,DNAAF1,DNAH11,DNAH2,DNAH5,DNAJC6,DZIP3,EIF2AK2,EIF2S3,EIF4A2,ELF3,EML…	225
Cancer,Endocrine System Disorders,Organismal Injury and Abnormalities,Reproductive System Disease	Ovarian serous tumor	1.45e-08			ABCC2,ABHD12B,ACP3,ADAMTSL3,ADORA2A,ANKRD36C,ARID2,ATR,AZGP1,B2M,BCLAF1,BCR,BRCA1,BRPF3,CARD16,CELSR3,CEP120,CEP152,CLASP1,CLDN3,CLDN7,CLUH,CMTM4,CNOT1,COL3A1,CREB5,DCAF16,DHX8,DIAPH1,DIP2B,DNAH11,DNAH2,DNAH5,DOCK3,EIF4A2,ELF3,EP300,EXOC3L4,FAM234B,FARP1,FOSL2,GATA3,GSTM5,IFI44L,IFIH1,JAG2,KDM4C,KNTC1,KRT7,KRT86,LRP8,MAP3K21,MECOM,MET,MGA,MSH6,MUC16,MYO9B,MYOF,NEDD4L,NF2,NUP50,OCLN,OTUD4,PHF3,PIK…	88
Gene Expression	Transcription of DNA	2.04e-08		-0.995	AAMDC,ABLIM1,ADORA2A,AHCTF1,AJUBA,ANKRD2,ARID2,ATF3,ATXN1L,AXIN1,BACH1,BCLAF1,BEND3,BHLHE41,BPTF,BRCA1,BRF1,BRPF1,CBX6,CC2D1B,CCNT1,CIPC,CNOT1,COL1A1,CREB5,CSF3,CUL3,DCN,DDN,DDX21,DDX58,DHX9,DLG1,DNAJC2,DUSP5,E2F2,ELF3,ELF4,ENG,EP300,EPAS1,FBXW11,FOSB,FOSL2,FOXJ3,FOXP4,FRK,GATA2,GATA3,GREM1,GRHL2,HELZ2,HIC1,HIPK2,HIVEP2,HNRNPAB,HOXA11,HOXC6,HSF4,IFI16,IFI27,IKZF2,IL18,IL1A,IL5,IRF7,IRF9,IRX4,JAK3…	168
Cancer,Organismal Injury and Abnormalities	Sarcoma	2.05e-08		1.018	ABL2,ACTA2,ADAMTSL3,AHCTF1,ALDH1A3,ALOX12B,ANGPTL4,ARFGEF1,ARID2,BPTF,BRCA1,CARD16,CCDC40,CCNT1,CD48,CDH8,CFTR,CHERP,CLDN3,CNNM1,COL3A1,CPAMD8,CTSL,DAPK1,DCN,DDHD1,DDX11,DDX58,DGKD,DNAH5,DOCK3,DOT1L,DST,ENG,FGD3,FMNL2,FOSL2,FRK,GABRE,GPC1,GPRC5D,GSE1,GTF3C4,HIPK2,IFI35,IL18,IL2RB,IL5,KLF3,LARP1,LETM1,LGALS3BP,LIMD1,LIMK1,LRPPRC,MED12,MERTK,MET,METTL16,MGA,MIS18BP1,MITF,MMP2,MTR,MUC16,MYBBP1A,MYH1…	131
Cellular Development,Cellular Growth and Proliferation	Cell proliferation of tumor cell lines	2.11e-08	Decreased	-3.835	ABCC2,ABL2,ABLIM1,ACACA,ACP3,ADRA1B,AGA,AIM2,AJUBA,AKR1B10,AMH,ANGPTL4,ANKHD1/ANKHD1-EIF4EBP3,AP1G1,ATF3,ATR,AXIN1,BCR,BRCA1,CABLES1,CAMK2N1,CCN3,CDC25A,CEACAM1,CLEC11A,COL1A1,CSF3,CYP1A1,CYP26A1,DCN,DDX21,DDX58,DGCR8,DGKD,DLX3,DUSP5,EIF3A,EIF4B,ELF3,ELF4,ELOVL7,ENC1,ENG,EP300,EPAS1,EXOC8,F3,FBXO32,FOSB,FOSL2,GADD45A,GATA2,GATA3,GPC1,GRHL2,GRK5,GSE1,HBEGF,HCAR1,HIC1,HIPK2,HOXA11,HOXC6,HSPB6,IFI16…	191
Cancer,Organismal Injury and Abnormalities	Malignant connective or soft tissue neoplasm	2.16e-08		0.173	ABL2,ACTA2,ADAMTSL3,AHCTF1,ALDH1A3,ALOX12B,ANGPTL4,ARFGEF1,ARID2,BPTF,BRCA1,CARD16,CCDC40,CCNT1,CD48,CDH8,CFTR,CHERP,CLDN3,CNNM1,COL3A1,CPAMD8,CTSL,DAPK1,DCN,DDHD1,DDX11,DDX58,DGKD,DNAH5,DOCK3,DOT1L,DST,ENG,FGD3,FMNL2,FOSL2,FRK,GABRE,GPC1,GPRC5D,GSE1,GTF3C4,HIPK2,IFI35,IL18,IL2RB,IL5,IRF7,KLF3,LARP1,LETM1,LGALS3BP,LIMD1,LIMK1,LRPPRC,MED12,MERTK,MET,METTL16,MGA,MIS18BP1,MITF,MMP2,MTR,MUC16,MYBBP1A…	133
Organismal Injury and Abnormalities,Renal and Urological Disease	Renal lesion	2.21e-08		1.127	ADORA1,ADORA2A,AGA,AJUBA,ANKHD1/ANKHD1-EIF4EBP3,ARHGAP5,ARHGEF7,ARID2,ASAP1,ATP13A3,ATR,ATXN2L,B2M,BICC1,BRCA1,BRF1,BRPF3,CAD,CD68,CDC6,CEP95,CIT,CLIP3,CTSL,CYP1A1,DAPK1,DCN,DDX58,DGCR8,DHX35,DST,EIF4A2,ENG,EP300,EPAS1,FCGR1A,FNBP1L,GABRE,GPM6A,GRIN2D,HAVCR1,HOXA11,HSPB6,IFI16,IFIT3,IFITM1,IL18,IL2RB,IL5,INTS1,ITGA5,ITGB3,KCNJ15,KIAA1549,KIF14,KLF3,KRT7,KRT80,LMTK2,MAGI1,MAP2K3,MASP2,MAST4,MCM2,M…	144
Cancer,Endocrine System Disorders,Gastrointestinal Disease,Organismal Injury and Abnormalities	Pancreatic carcinoid tumor	2.55e-08			AGAP1,AKAP13,CAMSAP2,CCDC30,CELSR3,CLASP1,COL1A2,DGKD,DNAH11,DNAH5,DOCK3,DST,EPAS1,GALNT9,HES4,HKDC1,IFI44L,IL18,ITCH,KIF3B,MET,MTHFD1,MYBBP1A,NLRP2,NRG1,NUP210,PCDH7,PDZD8,PKP2,PPARGC1B,PUM2,RASAL2,SAMD9,SENP5,SETX,SIPA1L3,SLFN13,SMCO2,SNX13,SOX30,SP110,SPICE1,STAT5B,STK36,TEX14,TEX35,TP53,TRIP12,UTRN,ZNF445,ZNF808	51
Cancer,Hematological Disease,Organismal Injury and Abnormalities	Bone marrow cancer	2.86e-08		-1.393	ABCC2,ABHD12B,ABL2,ADORA1,ADORA2A,ADRA1B,ADRB1,AGAP5 (includes others),AKAP13,ALOX12B,ANAPC1,ANGPTL4,ANKHD1/ANKHD1-EIF4EBP3,ANKRD18B,ANKRD22,ANO2,APLP1,ARHGEF5,ARID2,AZIN1,BAAT,BCLAF1,BCR,BRCA1,BRPF1,CCDC40,CD48,CD68,CDC25A,CDH8,CELSR3,CIPC,CLASP1,CLDN7,CLUH,COL4A5,CPLANE1,CSF3,CYP1A1,CYP26A1,DDX11,DDX58,DHX9,DNAH11,DNAH2,DNAH5,DOT1L,DST,EIF2AK2,ENG,EP300,EPB41L4B,F3,FAM168A,FAM83G,FARP2,FBXO10,F…	182
Cancer,Hematological Disease,Immunological Disease,Organismal Injury and Abnormalities	Lymphocytic leukemia	3.36e-08		-0.651	ABL2,ADAMTS16,ADORA1,ADORA2A,AGL,ARID2,ATR,ATRNL1,B2M,BCR,BIRC3,CAMK2N1,CD48,CLDN14,COL1A1,COL1A2,CYP1A1,DAGLA,DAPK1,DDX58,DLG1,DNAH5,ENC1,EP300,EPAS1,F3,FRMD4B,GABRE,GADD45A,GATA2,GATA3,IKZF2,IL5,JAK3,KLF3,KMT2A,LY6E,MAGI1,MED12,MGA,MR1,MSH6,MSL2,MTR,MTUS1,NALCN,NCOA6,NIPBL,NUP214,NUP98,OPA1,PAK2,PDE4D,PIK3CA,PIM1,PKD1L2,POLA1,POLE,POLQ,POU3F1,PPAT,PPTC7,PRDM15,PTPN11,PTPRZ1,RASSF5,REL,RPTOR,SIP…	90
Cancer,Hematological Disease,Immunological Disease,Organismal Injury and Abnormalities	Peripheral T-cell lymphoma	3.62e-08			COL1A2,COL3A1,ENG,EPAS1,FERMT2,GADD45A,GATA3,IFI44,IFI44L,IFIT3,ISG15,ITGA5,JAK3,MERTK,MGAT4A,MMP2,MOAP1,MYOF,PDE4D,PGF,PIK3CA,POLA1,PTPN11,REL,RELB,RHOBTB3,SOCS1,SP100,SP110,SPARC,SPEN,SPIB,STAT1,STAT5B,TFAP2A,TJP1,TP53,ZBTB10,ZNF331	39
Cancer,Hematological Disease,Organismal Injury and Abnormalities	Bone marrow neoplasm	3.87e-08		-1.122	ABCC2,ABHD12B,ABL2,ADORA1,ADORA2A,ADRA1B,ADRB1,AGAP5 (includes others),AKAP13,ALOX12B,ANAPC1,ANGPTL4,ANKHD1/ANKHD1-EIF4EBP3,ANKRD18B,ANKRD22,ANO2,APLP1,ARHGEF5,ARID2,AZIN1,BAAT,BCLAF1,BCR,BRCA1,BRPF1,CCDC40,CCL5,CD48,CD68,CDC25A,CDH8,CELSR3,CIPC,CLASP1,CLDN7,CLUH,COL4A5,CPLANE1,CSF3,CYP1A1,CYP26A1,DDX11,DDX58,DHX9,DNAH11,DNAH2,DNAH5,DOT1L,DST,EIF2AK2,ENG,EP300,EPB41L4B,F3,FAM168A,FAM83G,FARP2,FBX…	185
Cancer,Hematological Disease,Organismal Injury and Abnormalities	Myeloid neoplasm	3.94e-08		-1.287	ABCC2,ABHD12B,ABL2,ADORA1,ADORA2A,ADRA1B,ADRB1,AGAP5 (includes others),AKAP13,ALOX12B,ANAPC1,ANGPTL4,ANKHD1/ANKHD1-EIF4EBP3,ANKRD18B,ANKRD22,ANO2,APLP1,ARHGEF5,ARID2,AZIN1,BAAT,BCLAF1,BCR,BRCA1,BRPF1,CCDC40,CCL5,CD48,CD68,CDC25A,CDH8,CELSR3,CIPC,CLASP1,CLDN7,CLUH,COL4A5,CPLANE1,CSF3,CYP1A1,CYP26A1,DDX11,DDX58,DHX9,DNAH11,DNAH2,DNAH5,DOT1L,DST,EIF2AK2,ENG,EP300,EPB41L4B,F3,FAM168A,FAM83G,FARP2,FBX…	186
Dermatological Diseases and Conditions,Hematological Disease,Immunological Disease,Organismal Injury and Abnormalities	Lymphoproliferative disorder of the skin	5.44e-08			CD48,CEP120,DUSP5,HIC1,IFI35,IFI44,IFI6,IFITM1,IL22RA1,IL2RB,IRF7,ISG15,ISG20,JAK3,MAP3K14,MX1,NEDD4L,OAS1,OAS2,OASL,ODC1,PLAAT4,POLA1,REL,RSAD2,STAT1,STAT5B,TOX,TP53	29
Cancer,Organismal Injury and Abnormalities,Renal and Urological Disease	Development of renal tumor	5.46e-08			ADORA1,ADORA2A,AJUBA,ANKHD1/ANKHD1-EIF4EBP3,ARHGAP5,ARHGEF7,ARID2,ASAP1,ATP13A3,ATR,ATXN2L,B2M,BRCA1,BRPF3,CAD,CD68,CDC6,CEP95,CIT,CLIP3,CTSL,CYP1A1,DAPK1,DCN,DDX58,DHX35,DST,EIF4A2,EP300,EPAS1,FCGR1A,FNBP1L,GABRE,GPM6A,GRIN2D,HAVCR1,HSPB6,IFI16,IFIT3,IL18,IL2RB,IL5,INTS1,ITGA5,ITGB3,KCNJ15,KIAA1549,KIF14,KLF3,KRT7,KRT80,LMTK2,MAGI1,MAP2K3,MASP2,MAST4,MCM2,MECOM,MERTK,MET,MITF,MMP2,MPP1,MR1,MSH6,…	121
Cancer,Endocrine System Disorders,Organismal Injury and Abnormalities	Carcinoid tumor	5.88e-08			AGAP1,AKAP13,CAMSAP2,CCDC30,CELSR3,CLASP1,COL1A2,DGKD,DNAH11,DNAH5,DOCK3,DST,EPAS1,GALNT9,HES4,HKDC1,IFI44L,IL18,ITCH,KIF3B,MERTK,MET,MTHFD1,MYBBP1A,NLRP2,NRG1,NUP210,PCDH7,PDZD8,PIK3CA,PKP2,PPARGC1B,PUM2,RASAL2,SAMD9,SENP5,SETX,SIPA1L3,SLFN13,SMCO2,SNX13,SOX30,SP110,SPICE1,STAT5B,STK36,TEX14,TEX35,TP53,TRIP12,UTRN,ZNF445,ZNF808	53
Cell Death and Survival	Cell survival	6.03e-08	Decreased	-5.34	ABL2,ACACA,ADORA1,ADORA2A,AGA,AGTPBP1,AGTRAP,AKAP13,AMH,ANAPC1,ANTXR2,ARFGEF2,ATF3,ATR,B2M,BCLAF1,BCR,BRCA1,CAMK2N1,CCL5,CCN3,CD48,CDK11A,CEACAM1,CLDN3,CLEC11A,COL1A1,CSF3,CUL3,DEFB103A/DEFB103B,DGCR8,DHX38,DHX8,DHX9,DOT1L,DST,DUSP5,EIF3A,ELF3,ELF4,ENG,EP300,EPAS1,EPB41L2,FBXO32,FCGR1A,GADD45A,GATA2,GATA3,GCH1,GPC1,HBEGF,HEATR1,HIC1,HIPK2,HLA-F,HNRNPUL1,HOXC6,HSF4,HSH2D,HSPB6,IFIH1,IKZF2,IL18,IL1…	164
Cancer,Hematological Disease,Immunological Disease,Organismal Injury and Abnormalities	B cell cancer	6.18e-08	Increased	2.158	ABL2,ADAMTSL3,ADORA1,ADORA2A,ADRA1B,ADRB1,ALOX12B,ARHGAP42,ARID2,ATF3,ATR,AXIN1,B2M,BCLAF1,BCR,BICC1,BIRC3,BRCA1,CAD,CCL5,CD48,CD68,CEP250,CEP350,CNOT1,COL3A1,COL4A5,CPSF7,CTSL,DAPK1,DDX10,DDX58,DGKD,DIAPH1,DLG1,DNAH5,DST,E2F2,EP300,EPSTI1,FANCB,FRMD4B,GRIN2D,GSE1,HSF4,IFIT3,IKZF2,IL2RB,IL31RA,IL5,ITGB3,JAK3,KAT6A,KIAA0100,KLF3,KMT2A,LRRC37A3 (includes others),LY6E,MAP3K14,MED12,MGA,MMP2,MR1,MSH6…	137
Cell Death and Survival	Cell viability	6.32e-08	Decreased	-5.193	ABL2,ACACA,ADORA1,ADORA2A,AGA,AGTPBP1,AGTRAP,AKAP13,AMH,ANAPC1,ANTXR2,ARFGEF2,ATF3,ATR,B2M,BCLAF1,BCR,BRCA1,CAMK2N1,CCL5,CCN3,CD48,CDK11A,CEACAM1,CLDN3,CLEC11A,COL1A1,CSF3,CUL3,DGCR8,DHX38,DHX8,DHX9,DOT1L,DST,DUSP5,EIF3A,ELF3,ELF4,ENG,EP300,EPAS1,EPB41L2,FBXO32,FCGR1A,GADD45A,GATA2,GATA3,GCH1,GPC1,HBEGF,HEATR1,HIC1,HIPK2,HLA-F,HNRNPUL1,HOXC6,HSF4,HSH2D,HSPB6,IFIH1,IKZF2,IL18,IL1A,IL2RB,IL5,IRF9,I…	157
Cancer,Hematological Disease,Organismal Injury and Abnormalities	Malignant myeloid neoplasm	6.35e-08		-1.052	ABHD12B,ABL2,ADORA1,ADORA2A,ADRA1B,ADRB1,AGAP5 (includes others),AKAP13,ALOX12B,ANAPC1,ANGPTL4,ANKHD1/ANKHD1-EIF4EBP3,ANKRD18B,ANKRD22,ANO2,APLP1,ARHGEF5,ARID2,AZIN1,BAAT,BCLAF1,BCR,BRCA1,BRPF1,CCDC40,CD48,CD68,CDC25A,CDH8,CELSR3,CIPC,CLASP1,CLDN7,CLUH,COL4A5,CPLANE1,CSF3,CYP1A1,CYP26A1,DDX11,DHX9,DNAH11,DNAH2,DNAH5,DOT1L,DST,EIF2AK2,ENG,EP300,EPB41L4B,F3,FAM83G,FARP2,FBXO10,FGD3,FRMD4B,GABRE,GAD…	179
Cancer,Organismal Injury and Abnormalities,Renal and Urological Disease	Urothelial cancer	6.55e-08			AJUBA,ALOX12B,ATR,ATXN2L,BRCA1,CD48,CDC6,CLIP3,DCN,DLX3,DOT1L,EIF4A2,ELF3,EP300,GATA3,GRIN2D,HSPB6,JAK3,KIF14,KMT2A,KRT7,KRT80,LY6E,MCM2,MECOM,MED12,MET,MMP13,MMP2,NF2,OVGP1,PIK3CA,PLK2,PMS2,POLE,POLQ,POU3F1,RPTOR,SHANK3,SIN3A,SOCS1,STAG2,STRN3,TIMP3,TP53,TPM2,ZIC5	47
Cancer,Endocrine System Disorders,Gastrointestinal Disease,Organismal Injury and Abnormalities	Pancreatic adenocarcinoma	7.05e-08			ABTB2,ADAD2,ADAMTSL3,AGL,AIM2,AKAP13,ANKHD1/ANKHD1-EIF4EBP3,ANKRD34A,AP1G1,AP4E1,ARFGEF2,ARHGEF7,ARID2,ASAP1,ATRNL1,AZGP1,BICC1,BRCA1,BRPF3,CAD,CAPN7,CARD19,CASD1,CC2D1B,CCN3,CCNB1IP1,CDAN1,CDH8,CELSR3,CEP295,CFTR,CHERP,CIT,CLUH,CMPK2,CNNM1,CNOT1,COL1A1,COL1A2,CPLANE1,DAPK1,DCTN4,DDX58,DHX38,DHX58,DHX9,DIP2B,DLG1,DNAAF1,DNAH11,DNAH2,DNAH5,DNAJC6,DZIP3,EIF2AK2,EIF2S3,EIF4A2,ELF3,EML4,ENG,EP400,ERV…	202
Gene Expression	Activation of DNA endogenous promoter	7.23e-08		-1.611	AAMDC,ABLIM1,AJUBA,ANKRD2,ARID2,ATF3,ATXN1L,BACH1,BEND3,BHLHE41,BPTF,BRCA1,BRF1,CBX6,CC2D1B,CCNT1,CNOT1,CREB5,CSF3,CUL3,DCN,DDN,DDX21,DDX58,DHX9,DLG1,E2F2,ELF3,ELF4,ENG,EP300,EPAS1,FOSB,FOSL2,FOXJ3,FOXP4,FRK,GATA2,GATA3,GREM1,GRHL2,HELZ2,HIC1,HIPK2,HIVEP2,HNRNPAB,HOXC6,HSF4,IFI16,IFI27,IKZF2,IL18,IL1A,IRF7,IRF9,IRX4,JAK3,KAT2A,KDM4C,KLF3,KMT2A,LRP8,MAFB,MECOM,MED12,MESP2,MET,MITF,MYBL1,MYO6,NCOA6…	137
Infectious Diseases	Replication of vesicular stomatitis virus	7.8e-08	Decreased	-2.21	DDX58,FCGR1A,IFIH1,IFITM3,IRF9,ISG20,LY6E,OAS1,OASL,PARP12,PLAAT4,SMURF1,SOCS1,SP110,TAP1,TP53,USP2	17
Cancer,Organismal Injury and Abnormalities,Renal and Urological Disease	Renal cell carcinoma	8.83e-08			ADORA1,ADORA2A,AJUBA,ANKHD1/ANKHD1-EIF4EBP3,ARHGAP5,ARHGEF7,ARID2,ASAP1,ATP13A3,ATR,ATXN2L,B2M,BRCA1,BRPF3,CAD,CD68,CDC6,CEP95,CIT,CLIP3,CTSL,CYP1A1,DAPK1,DCN,DDX58,DHX35,DST,EIF4A2,EP300,FCGR1A,FNBP1L,GABRE,GPM6A,GRIN2D,HAVCR1,HSPB6,IFI16,IFIT3,IL18,IL2RB,IL5,INTS1,ITGA5,ITGB3,KCNJ15,KIAA1549,KIF14,KLF3,KRT7,KRT80,LMTK2,MAGI1,MAP2K3,MASP2,MAST4,MCM2,MECOM,MERTK,MET,MITF,MMP2,MPP1,MR1,MSH6,MUC16,…	120
Cancer,Endocrine System Disorders,Gastrointestinal Disease,Organismal Injury and Abnormalities	Pancreatic ductal adenocarcinoma	8.87e-08			ABTB2,ADAD2,ADAMTSL3,AGL,AIM2,AKAP13,ANKHD1/ANKHD1-EIF4EBP3,ANKRD34A,AP1G1,AP4E1,ARFGEF2,ARHGEF7,ARID2,ASAP1,ATRNL1,AZGP1,BICC1,BRCA1,BRPF3,CAD,CAPN7,CARD19,CASD1,CC2D1B,CCN3,CCNB1IP1,CDAN1,CDH8,CELSR3,CEP295,CFTR,CHERP,CIT,CLUH,CMPK2,CNNM1,CNOT1,COL1A1,COL1A2,CPLANE1,DAPK1,DCTN4,DDX58,DHX38,DHX58,DHX9,DIP2B,DLG1,DNAAF1,DNAH11,DNAH2,DNAH5,DNAJC6,DZIP3,EIF2AK2,EIF2S3,EIF4A2,ELF3,EML4,ENG,EP400,ERV…	198
Cancer,Endocrine System Disorders,Organismal Injury and Abnormalities	Neuroendocrine tumor	9.24e-08		-0.471	ACTA2,ADRA1B,AGAP1,AKAP13,AXIN1,B2M,CABLES1,CAD,CAMSAP2,CCDC30,CD48,CELSR3,CLASP1,CLIC1,COL1A2,DAPK1,DCN,DGKD,DNAH11,DNAH5,DOCK3,DOT1L,DST,ENG,EP300,EP400,EPAS1,FBXO15,GADD45A,GALNT9,GNG3,HES4,HKDC1,IFI44L,IFITM3,IL18,ITCH,ITGB3,KIF3B,KMT2A,KRT7,LTB4R,LURAP1L,MDC1,MERTK,MET,MMP24,MTHFD1,MYBBP1A,NLRP2,NRG1,NUP210,ODC1,PCDH7,PDZD8,PIK3CA,PKP2,POLD4,PPARGC1B,PREPL,PUM2,RASAL2,RASSF5,SAMD9,SENP5,SETX…	85
Cancer,Organismal Injury and Abnormalities,Reproductive System Disease	Female genital tract serous carcinoma	1e-07			ACTG2,ATR,B2M,BCR,BRCA1,CARD16,CDC6,CIT,CLDN3,CLDN7,CMTM4,COL3A1,DST,EIF4A2,ELF3,EP300,F3,GATA3,GPM6A,GSTM5,HOXA11,HSPB6,IL18,ISG15,JAG2,KRT7,LAMP3,LRP8,MAP3K21,MECOM,MET,MFAP4,MUC16,OCLN,PDZK1IP1,PI3,PIK3CA,PLAUR,POLQ,PPIF,PTPN11,SIN3A,SLC7A5,STAG2,STAT1,TFAP2A,TIMP3,TNFAIP2,TNIP1,TP53,USP7,VAV3,WWC1,XPO1	54
Cancer,Endocrine System Disorders,Organismal Injury and Abnormalities	Extrapancreatic neuroendocrine tumor	1.02e-07			ACTA2,ADRA1B,AGAP1,AKAP13,B2M,CABLES1,CAD,CAMSAP2,CCDC30,CD48,CELSR3,CLASP1,COL1A2,DAPK1,DCN,DGKD,DNAH11,DNAH5,DOCK3,DOT1L,DST,ENG,EP300,EP400,EPAS1,FBXO15,GADD45A,GALNT9,GNG3,HES4,HKDC1,IFI44L,IFITM3,IL18,ITCH,KIF3B,KMT2A,KRT7,LTB4R,LURAP1L,MDC1,MERTK,MET,MMP24,MTHFD1,MYBBP1A,NLRP2,NRG1,NUP210,PCDH7,PDZD8,PIK3CA,PKP2,POLD4,PPARGC1B,PREPL,PUM2,RASAL2,RASSF5,SAMD9,SENP5,SETX,SIPA1L3,SLFN13,SMCO2,S…	81
Cancer,Endocrine System Disorders,Gastrointestinal Disease,Organismal Injury and Abnormalities	Pancreatic carcinoma	1.08e-07			ABTB2,ADAD2,ADAMTSL3,AGL,AIM2,AKAP13,ANKHD1/ANKHD1-EIF4EBP3,ANKRD34A,AOC2,AP1G1,AP4E1,ARFGEF2,ARHGEF7,ARID2,ASAP1,ATG2A,ATR,ATRNL1,AZGP1,BICC1,BRCA1,BRPF3,CAD,CAPN7,CARD19,CASD1,CC2D1B,CCN3,CCNB1IP1,CDAN1,CDH8,CELSR3,CEP295,CFTR,CHERP,CIT,CLUH,CMPK2,CNNM1,CNOT1,COL1A1,COL1A2,CPLANE1,DAPK1,DCTN4,DDX58,DHX38,DHX58,DHX9,DIP2B,DLG1,DNAAF1,DNAH11,DNAH2,DNAH5,DNAJC6,DZIP3,EIF2AK2,EIF2S3,EIF4A2,ELF3,EML…	210
Cancer,Organismal Injury and Abnormalities,Renal and Urological Disease	Kidney carcinoma	1.18e-07			ADORA1,ADORA2A,AJUBA,ANKHD1/ANKHD1-EIF4EBP3,ARHGAP5,ARHGEF7,ARID2,ASAP1,ATP13A3,ATR,ATXN2L,B2M,BRCA1,BRPF3,CAD,CD68,CDC6,CEP95,CIT,CLIP3,CTSL,CYP1A1,DAPK1,DCN,DDX58,DHX35,DST,EIF4A2,EP300,FCGR1A,FNBP1L,GABRE,GPM6A,GRIN2D,HAVCR1,HSPB6,IFI16,IFIT3,IL18,IL2RB,IL5,INTS1,ITGA5,ITGB3,KCNJ15,KIAA1549,KIF14,KLF3,KRT7,KRT80,LMTK2,MAGI1,MAP2K3,MASP2,MAST4,MCM2,MECOM,MERTK,MET,MITF,MMP2,MPP1,MR1,MSH6,MUC16,…	121
Cancer,Hematological Disease,Immunological Disease,Organismal Injury and Abnormalities	Mature B cell malignant tumor	1.22e-07			ADAMTSL3,ADRA1B,ADRB1,ALOX12B,ARHGAP42,ARID2,ATF3,ATR,AXIN1,B2M,BCLAF1,BICC1,BIRC3,BRCA1,CAD,CCL5,CD48,CD68,CEP250,CEP350,CNOT1,COL3A1,COL4A5,CPSF7,CTSL,DDX10,DDX58,DGKD,DIAPH1,DLG1,DNAH5,DST,E2F2,EP300,EPSTI1,FANCB,FRMD4B,GRIN2D,GSE1,HSF4,IFIT3,IL2RB,IL31RA,ITGB3,JAK3,KAT6A,KIAA0100,KLF3,KMT2A,LRRC37A3 (includes others),LY6E,MAP3K14,MED12,MGA,MMP2,MR1,MUC16,MYOF,NCOA6,NUP98,PAPLN,PASK,PIK3CA,PIM…	116
Cancer,Endocrine System Disorders,Gastrointestinal Disease,Organismal Injury and Abnormalities	Pancreatic endocrine tumor	1.27e-07		-0.471	AGAP1,AKAP13,CAMSAP2,CCDC30,CELSR3,CLASP1,COL1A2,DGKD,DNAH11,DNAH5,DOCK3,DST,ENG,EPAS1,GALNT9,HES4,HKDC1,IFI44L,IL18,ITCH,ITGB3,KIF3B,MERTK,MET,MTHFD1,MYBBP1A,NLRP2,NRG1,NUP210,PCDH7,PDZD8,PKP2,PPARGC1B,PUM2,RASAL2,SAMD9,SENP5,SETX,SIPA1L3,SLFN13,SMCO2,SNX13,SOX30,SP110,SPICE1,STAT5B,STK36,TEX14,TEX35,TP53,TRIP12,UTRN,ZNF445,ZNF808	54
Cell Death and Survival	Cell death of tumor cell lines	1.59e-07		1.09	ABL2,ACACA,ADAMTS16,ADORA1,ADORA2A,ADRB1,AGA,AIM2,AKR1B10,AMH,ANTXR2,ATF3,ATR,AXIN1,B2M,B3GALT5,BACH1,BCLAF1,BCR,BIRC3,BRCA1,CABLES1,CD48,CDC25A,CDC6,CEACAM1,CIDEB,CLASP1,COL1A1,CYP26A1,DAPK1,DDIT4,DDX58,DGKD,DHX9,DST,E2F2,EIF2AK2,EIF4B,ENC1,ENG,EP300,EPAS1,FBXO32,FCGR1A,FOSB,GADD45A,GPC1,GPM6A,GRHL2,GRK5,HBEGF,HCAR1,HIC1,HIPK2,HOXA11,HOXC6,HSH2D,IFI16,IFI6,IFIH1,IGF2BP2,IL18,IL1A,IRF9,IRGM,ITCH,…	172
Cancer,Neurological Disease,Organismal Injury and Abnormalities	Nervous system neoplasm	1.98e-07		1.544	ABHD12B,ADORA1,ADRA1B,AGAP5 (includes others),AJUBA,ANKRD18B,ANKRD31,ANKRD34A,ANO2,ARHGAP5,ARID2,ATR,AXIN1,BRCA1,CCDC40,CD48,CDH8,CFTR,CHERP,CIPC,CLEC11A,COBL,COL1A1,COL1A2,COL3A1,CSF3,CUL3,DCAF4,DST,EIF5B,ELOVL7,ENC1,ENG,EP300,EPAS1,FCGR1A,FOSL2,FRK,FRMD4B,GALNT5,GEMIN5,GRK5,GSTM5,HAVCR1,HBEGF,HIPK2,IFITM3,IL18,IL1A,IL2RB,ITGB3,JAK3,JPH1,KAT6B,KDM4C,KLF3,KMT2A,LETM1,LIMK1,LURAP1L,LY6E,MAPK8IP2,M…	146
Connective Tissue Disorders,Inflammatory Disease,Organismal Injury and Abnormalities,Skeletal and Muscular Disorders	Rheumatic Disease	2.62e-07		-0.619	ABCC2,ACTA2,ADAMTS16,ADORA2A,ADRA1B,ADRB1,AIM2,AKAP13,ANAPC2,ASAP1,AZGP1,B2M,BST2,CASC3,CCL5,CD68,CEACAM1,COL1A1,COL1A2,COL3A1,COL4A5,COL9A2,CSF3,CTSL,CXCL5,DAPK1,DDX58,DHX58,DIAPH1,DUSP5,E2F2,EIF2AK2,ELF3,EPAS1,EPSTI1,FCGR1A,FOSB,GABRE,GATA3,GSDMC,HAVCR1,HELZ2,IFI16,IFI27,IFI44,IFI44L,IFI6,IFIH1,IFIT1,IFIT3,IFITM1,IL18,IL1A,IL2RB,IL5,IRF7,ISG15,ISG20,ITGA5,JAG2,JAK3,KCNJ15,KLF3,LAMP3,LTB,LTB4R,L…	139
Cancer,Organismal Injury and Abnormalities	Development of neuroepithelial tumor	2.64e-07		1.358	ABHD12B,ADORA1,AGAP5 (includes others),AJUBA,ANKRD18B,ANKRD31,ANKRD34A,ANO2,ARHGAP5,ARID2,ATR,BRCA1,CCDC40,CD48,CDH8,CFTR,CHERP,CIPC,CLEC11A,COBL,COL1A1,COL1A2,COL3A1,CSF3,CUL3,DCAF4,DST,EIF5B,ELOVL7,ENC1,ENG,EP300,FRK,FRMD4B,GALNT5,GRK5,GSTM5,HAVCR1,HBEGF,HIPK2,IFITM3,IL18,IL1A,ITGB3,JAK3,JPH1,KAT6B,KIF14,KLF3,LETM1,LIMK1,LY6E,MAPK8IP2,MAST3,MDK,MECOM,MED12,MERTK,MESP2,MET,MSH6,MUC16,MYO1D,NF2,N…	124
Cancer,Endocrine System Disorders,Organismal Injury and Abnormalities	Abdominal neuroendocrine tumor	2.9e-07		-0.471	ADRA1B,AGAP1,AKAP13,CAMSAP2,CCDC30,CELSR3,CLASP1,COL1A2,DGKD,DNAH11,DNAH5,DOCK3,DOT1L,DST,ENG,EPAS1,GALNT9,HES4,HKDC1,IFI44L,IL18,ITCH,ITGB3,KIF3B,KMT2A,MERTK,MET,MTHFD1,MYBBP1A,NLRP2,NRG1,NUP210,PCDH7,PDZD8,PIK3CA,PKP2,PPARGC1B,PUM2,RASAL2,SAMD9,SENP5,SETX,SIPA1L3,SLFN13,SMCO2,SNX13,SOX30,SP110,SPEN,SPICE1,STAT5B,STK36,TEX14,TEX35,TP53,TRIP12,UTRN,ZNF445,ZNF808	59
Cancer,Hematological Disease,Immunological Disease,Organismal Injury and Abnormalities	B-cell lymphoma	3.18e-07	Increased	2.16	ABL2,ADAMTSL3,ADORA1,ADORA2A,ARHGAP42,ATF3,B2M,BCLAF1,BICC1,BIRC3,CAD,CD48,CD68,CEP250,CEP350,CNOT1,COL3A1,COL4A5,CPSF7,CTSL,DDX10,DDX58,DGKD,DIAPH1,DLG1,DNAH5,DST,E2F2,EP300,FANCB,GSE1,HSF4,IL2RB,ITGB3,JAK3,KAT6A,KIAA0100,KMT2A,LRRC37A3 (includes others),MED12,MGA,MMP2,MR1,MUC16,MYOF,NCOA6,NFKB2,NUP214,NUP98,PAPLN,PARP14,PIK3CA,PIM1,PKP2,PLEKHA7,PMS2,POLA1,POLE,POLR3B,PPAT,PSMB8,PSMB9,PTPN11,PTP…	105
Cancer,Neurological Disease,Organismal Injury and Abnormalities	Glioma	3.24e-07		1.353	ABHD12B,ADORA1,AGAP5 (includes others),AJUBA,ANKRD18B,ANKRD31,ANKRD34A,ANO2,ARHGAP5,ARID2,ATR,BRCA1,CCDC40,CD48,CDH8,CFTR,CHERP,CIPC,CLEC11A,COBL,COL1A1,COL1A2,COL3A1,CSF3,CUL3,DCAF4,DST,EIF5B,ELOVL7,ENC1,ENG,EP300,FRK,FRMD4B,GALNT5,GRK5,GSTM5,HAVCR1,HBEGF,HIPK2,IFITM3,IL18,IL1A,ITGB3,JAK3,JPH1,KAT6B,KLF3,LETM1,LIMK1,LY6E,MAPK8IP2,MAST3,MDK,MECOM,MED12,MERTK,MESP2,MET,MSH6,MUC16,MYO1D,NF2,NIPBL,N…	123
Cancer,Hematological Disease,Immunological Disease,Organismal Injury and Abnormalities	Acute leukemia	4.45e-07		-1.068	ABHD12B,ABL2,ADORA1,ADORA2A,ADRA1B,ADRB1,AGAP5 (includes others),AKAP13,ALOX12B,ANAPC1,ANGPTL4,ANKHD1/ANKHD1-EIF4EBP3,ANKRD18B,ANKRD22,ANO2,APLP1,ARHGEF5,ARID2,AZIN1,BAAT,BCLAF1,BCR,BRCA1,BRPF1,CAMK2N1,CCDC40,CD48,CD68,CDH8,CELSR3,CLASP1,CLDN7,CLUH,COL4A5,CPLANE1,CSF3,CYP1A1,CYP26A1,DDX11,DHX9,DNAH11,DNAH2,DNAH5,DOT1L,DST,EIF2AK2,EP300,EPB41L4B,F3,FAM83G,FARP2,FBXO10,FGD3,GABRE,GADD45A,GALNT9,GAT…	174
Cancer,Organismal Injury and Abnormalities	Advanced malignant tumor	4.69e-07		-1.662	ABL2,ABLIM1,ACTA2,ANGPTL4,ANTXR2,ARID2,ASAP1,ATF3,ATR,B2M,BACH1,BCR,BHLHE41,BRCA1,CARD16,CCL5,CD48,CDC25A,CLDN3,CMTM4,CSF3,CXCL5,CYP26A1,DAPK1,DDX58,DLX3,DOT1L,ENG,EP300,EPAS1,EPB41L4B,EPSTI1,F3,FCGR1A,FNBP1L,FRK,FRS2,GABRE,GADD45A,GATA2,GATA3,GCH1,GRHL2,GRIN2D,GSE1,GSTM5,HCAR1,HIC1,HNRNPAB,HOXC6,IFITM3,IKZF2,IL18,IL1A,IL22RA1,IL2RB,IL5,IRF7,ITGB3,JAG2,JAK3,KAT6A,KMT2A,LIMK1,LRP8,LTB,MAFB,MAGI1,M…	123
Organismal Development	Morphology of body cavity	6.35e-07			ABCC2,ABL2,ACP3,ACTG2,ADORA1,ADORA2A,ADRA1B,ADRB1,AGA,AGL,AIM2,AKAP13,AMH,ANGPTL4,ANKRD17,ANTXR2,ARHGAP5,ATF3,ATXN1L,AZGP1,B2M,BCR,BICC1,BIRC3,BRCA1,CABLES1,CCN3,CCNT1,CEACAM1,CELSR3,CFTR,CIDEB,CLDN7,COL3A1,COL9A2,CSF3,CUL3,CYP1A1,CYP26A1,DAPK1,DCN,DDX58,DGCR8,DHX58,DIAPH1,DLG1,DLX3,DNAH11,DOK7,DOT1L,DUSP5,E2F2,ELN,EP300,EPAS1,F3,FAM20A,FBXO32,FOXP4,GADD45A,GATA2,GCSAM,GJC1,GREM1,GRK5,HBEGF,HELZ2…	173
Cancer,Neurological Disease,Organismal Injury and Abnormalities	Central nervous system tumor	6.51e-07		1.481	ABHD12B,ADORA1,AGAP5 (includes others),AJUBA,ANKRD18B,ANKRD31,ANKRD34A,ANO2,ARHGAP5,ARID2,ATR,AXIN1,BRCA1,CCDC40,CD48,CDH8,CFTR,CHERP,CIPC,CLEC11A,COBL,COL1A1,COL1A2,COL3A1,CSF3,CUL3,DCAF4,DST,EIF5B,ELOVL7,ENC1,ENG,EP300,FOSL2,FRK,FRMD4B,GALNT5,GEMIN5,GRK5,GSTM5,HAVCR1,HBEGF,HIPK2,IFITM3,IL18,IL1A,ITGB3,JAK3,JPH1,KAT6B,KDM4C,KLF3,LETM1,LIMK1,LURAP1L,LY6E,MAPK8IP2,MAST3,MDK,MECOM,MED12,MERTK,MESP2…	138
Cancer,Organismal Injury and Abnormalities,Renal and Urological Disease	Urothelial transitional cell carcinoma	6.56e-07			AJUBA,ALOX12B,ATR,ATXN2L,BRCA1,CDC6,CLIP3,DCN,DLX3,DOT1L,EIF4A2,ELF3,EP300,GATA3,GRIN2D,HSPB6,JAK3,KIF14,KMT2A,KRT80,MCM2,MECOM,MED12,MET,MMP13,MMP2,NF2,OVGP1,PIK3CA,PLK2,PMS2,POLE,POLQ,RPTOR,SHANK3,SIN3A,SOCS1,STAG2,TIMP3,TP53,TPM2,ZIC5	42
Cancer,Organismal Injury and Abnormalities	Transitional-cell carcinoma	6.95e-07			AJUBA,ALOX12B,ATR,ATXN2L,BRCA1,CDC6,CLIP3,DCN,DLX3,DOT1L,EIF4A2,ELF3,EP300,GATA3,GRIN2D,HSPB6,JAK3,KIF14,KMT2A,KRT80,MCM2,MECOM,MED12,MET,MMP13,MMP2,MTR,NF2,OVGP1,PIK3CA,PLK2,PMS2,POLE,POLQ,RPTOR,SHANK3,SIN3A,SOCS1,STAG2,TIMP3,TP53,TPM2,ZIC5	43
Infectious Diseases	Infection of kidney cell lines	7.85e-07	Decreased	-4.939	AHCTF1,AKAP13,ANAPC2,CAD,CCL5,CLIP3,CTSL,DEFB103A/DEFB103B,EIF2AK2,ENC1,EP300,EPAS1,GINS4,HAVCR1,IFITM1,IFITM3,ISG20,KAT6A,KPNB1,MT2A,MYO1F,MYOF,NCOA6,NEDD4,NUP214,NUP50,NUP98,PARP9,PDZD8,POLR2A,PRPF8,REPIN1,RSAD2,SPEN,SRSF6,TRIM55,ZNF292,ZNF594	38
Cancer,Dermatological Diseases and Conditions,Hematological Disease,Immunological Disease,Organismal Injury and Abnormalities	Cutaneous T-cell lymphoma	8.13e-07			IFI35,IFI44,IFI6,IFITM1,IL22RA1,IL2RB,IRF7,ISG15,ISG20,JAK3,MX1,OAS1,OAS2,OASL,ODC1,PLAAT4,REL,RSAD2,STAT1,STAT5B,TP53	21
Hematological Disease,Immunological Disease	Primary antiphospholipid antibody syndrome	8.18e-07			DLG1,ISG15,KDM4C,LGALS3BP,OAS2,PHF3,PLSCR1,SNX13,SPEN,STAT1,WARS1,ZNF43	12
Infectious Diseases	Infection by HIV-1	8.28e-07	Decreased	-5.554	ACP3,AHCTF1,AKAP13,ANAPC2,BCLAF1,BCR,BRCA1,CAD,CARD16,CCL5,CCNT1,CLIP3,DDX10,DHX9,ENC1,EP300,EPAS1,FBXW11,GABRE,GINS4,HEATR1,HIP1R,IL18,IL1A,KAT2A,KAT6A,KPNB1,LRRC8D,LTB4R,MAP3K14,MAP3K9,MECOM,MR1,MT2A,MYO1F,MYOF,NCOA6,NEDD4,NF2,NUP155,NUP214,NUP50,NUP98,PARP9,PDZD8,PHF3,PKD1L2,POLR2A,PPIB,PRPF8,REPIN1,RGPD4 (includes others),RND1,RPS6KA3,RTN2,SEC14L1,SENP5,SLC46A1,SP110,SPEN,SPTAN1,SPTBN1,SRSF6,…	71
Cellular Movement	Cell movement	8.7e-07		-1.064	ABL2,ACACA,ACTA2,ADORA1,ADORA2A,AGTRAP,AIM2,AJUBA,ANGPTL4,ANKRD28,ANKS1A,ARFGEF1,ARFGEF2,ARHGAP5,ARHGAP8/PRR5-ARHGAP8,ARHGEF5,ARHGEF7,ARID2,ASAP1,ATF3,BCR,BHLHE41,BRCA1,BST2,CCDC40,CCL28,CCL5,CCN3,CCNT1,CD48,CEACAM1,CELSR3,CFAP44,CFTR,CLASP1,CLDN3,CLDN7,CLEC11A,CLIC1,COL1A1,COL1A2,COL3A1,CSF3,CTSL,CXCL5,CYP1A1,CYP26A1,DCN,DDHD1,DDIT4,DDX58,DEFB103A/DEFB103B,DGCR8,DGKD,DIAPH1,DLX3,DNAH11,DNAH5,DOC…	234
Cell Death and Survival	Cell viability of tumor cell lines	9.13e-07	Decreased	-4.877	ABL2,ACACA,ADORA2A,AGA,AGTRAP,AKAP13,ANAPC1,ANTXR2,ARFGEF2,ATF3,ATR,B2M,BCLAF1,BCR,BRCA1,CAMK2N1,CCN3,CDK11A,CLDN3,COL1A1,DHX38,DHX8,DHX9,DST,DUSP5,EIF3A,ELF3,ENG,EP300,EPAS1,EPB41L2,GATA2,GPC1,HBEGF,HEATR1,HIC1,HNRNPUL1,HOXC6,HSF4,IL1A,IL5,ITGB3,JAG2,JAK3,KPNB1,LGALS3BP,MAP2K3,MAP3K14,MCM2,MDK,MECOM,MET,MITF,MTMR1,NFKB2,NKRF,NRG1,NUP155,NUP210,PARP14,PHKA2,PHLPP2,PIK3CA,PIM1,PLAUR,PLK2,POLR1A,PP…	108
Cellular Development,Cellular Growth and Proliferation	Proliferation of blood cells	9.28e-07	Decreased	-2.416	ACP3,ADORA2A,AKAP13,AXIN1,B2M,BCLAF1,BCR,BIRC3,BRCA1,BRPF1,CCL5,CD48,CDC25A,CEACAM1,CLEC11A,CSF3,DCN,DGCR8,DIAPH1,DLG1,DUSP5,E2F2,EIF2AK2,ELF4,EP300,EPAS1,GADD45A,GATA2,GATA3,GCH1,HAVCR1,HIPK2,HSH2D,IFI16,IKZF2,IL18,IL1A,IL2RB,IL31RA,IL5,ISG15,ISG20,ITCH,ITGA5,ITGB3,JAG2,JAK3,KAT2A,KLF3,KMT2A,LTB,MAFB,MAP3K14,MDK,MECOM,MERTK,MET,MYBL1,MYH10,NFKB2,NRG1,NUP214,NUP98,PARP14,PDE4D,PGF,PIK3CA,PIM1,PLA…	100
Cancer,Hematological Disease,Immunological Disease,Organismal Injury and Abnormalities	B-cell non-Hodgkin lymphoma	1.19e-06			ABL2,ADAMTSL3,ADORA1,ADORA2A,ARHGAP42,ATF3,B2M,BCLAF1,BICC1,BIRC3,CAD,CD48,CD68,CEP250,CEP350,CNOT1,COL3A1,COL4A5,CPSF7,CTSL,DDX10,DDX58,DGKD,DIAPH1,DLG1,DNAH5,DST,E2F2,EP300,FANCB,GSE1,HSF4,IL2RB,ITGB3,JAK3,KAT6A,KIAA0100,KMT2A,LRRC37A3 (includes others),MED12,MGA,MMP2,MUC16,MYOF,NCOA6,NUP98,PAPLN,PIK3CA,PIM1,PKP2,PLEKHA7,POLA1,POLE,POLR3B,PPAT,PSMB8,PSMB9,PTPN11,PTPRF,PTPRZ1,RBCK1,RCC1,REL,RPTO…	97
Cancer,Organismal Injury and Abnormalities	Soft tissue sarcoma	1.22e-06		0.523	ABL2,ADAMTSL3,AHCTF1,ALDH1A3,ALOX12B,ARFGEF1,ARID2,BRCA1,CARD16,CCDC40,CCNT1,CD48,CDH8,CFTR,CHERP,CLDN3,CNNM1,COL3A1,CPAMD8,CTSL,DAPK1,DCN,DDHD1,DDX11,DDX58,DGKD,DNAH5,DOT1L,DST,ENG,FGD3,FMNL2,FRK,GABRE,GPC1,GPRC5D,GSE1,GTF3C4,IFI35,IL18,IL2RB,IL5,KLF3,LARP1,LIMD1,LIMK1,LRPPRC,MED12,MERTK,MET,METTL16,MIS18BP1,MITF,MMP2,MTR,MUC16,MYBBP1A,MYH14,MYO1D,NBAS,NF2,OASL,OVGP1,PARP10,PDP2,PFAS,PHACTR1,PIK…	108
Infectious Diseases	Infection by Retroviridae	1.23e-06	Decreased	-5.583	ACP3,ADORA1,ADORA2A,AHCTF1,AKAP13,ANAPC2,B2M,BCLAF1,BCR,BRCA1,CAD,CARD16,CCL5,CCNT1,CFTR,CLIP3,DDX10,DHX9,ENC1,EP300,EPAS1,FBXW11,FCGR1A,GABRE,GINS4,GRIN2D,HEATR1,HIP1R,IL18,IL1A,IL2RB,KAT2A,KAT6A,KPNB1,LRRC8D,LTB4R,MAP3K14,MAP3K9,MECOM,MERTK,MR1,MT2A,MYO1F,MYOF,NCOA6,NEDD4,NF2,NUP155,NUP214,NUP50,NUP98,PARP9,PDE4D,PDZD8,PHF3,PKD1L2,POLA1,POLR2A,PPIB,PRPF8,REPIN1,RGPD4 (includes others),RND1,RPS6…	82
Cancer,Hematological Disease,Immunological Disease,Organismal Injury and Abnormalities	Myeloid leukemia	1.34e-06		-1.393	ABCC2,ABHD12B,ABL2,ADORA1,ADORA2A,ADRA1B,ADRB1,AGAP5 (includes others),AKAP13,ALOX12B,ANAPC1,ANGPTL4,ANKHD1/ANKHD1-EIF4EBP3,ANKRD18B,ANKRD22,ANO2,APLP1,ARHGEF5,ARID2,AZIN1,BAAT,BCLAF1,BCR,BRCA1,BRPF1,CCDC40,CD48,CD68,CDH8,CELSR3,CLASP1,CLDN7,CLUH,COL4A5,CPLANE1,CSF3,CYP1A1,CYP26A1,DDX11,DDX58,DHX9,DNAH11,DNAH2,DNAH5,DOT1L,DST,EIF2AK2,EP300,EPB41L4B,F3,FAM168A,FAM83G,FARP2,FBXO10,FGD3,GABRE,GADD45…	163
Infectious Diseases	HIV infection	1.52e-06	Decreased	-5.583	ACP3,ADORA1,ADORA2A,AHCTF1,AKAP13,ANAPC2,B2M,BCLAF1,BCR,BRCA1,CAD,CARD16,CCL5,CCNT1,CFTR,CLIP3,DDX10,DHX9,ENC1,EP300,EPAS1,FBXW11,FCGR1A,GABRE,GINS4,GRIN2D,HEATR1,HIP1R,IL18,IL1A,IL2RB,KAT2A,KAT6A,KPNB1,LRRC8D,LTB4R,MAP3K14,MAP3K9,MECOM,MR1,MT2A,MYO1F,MYOF,NCOA6,NEDD4,NF2,NUP155,NUP214,NUP50,NUP98,PARP9,PDE4D,PDZD8,PHF3,PKD1L2,POLA1,POLR2A,PPIB,PRPF8,REPIN1,RGPD4 (includes others),RND1,RPS6KA3,RT…	81
Cell Cycle	Cell cycle progression	1.62e-06	Decreased	-2.758	ADRA1B,AJUBA,ANAPC2,ANKRD17,ANKS1A,ATF3,ATR,BCR,BRCA1,CABLES1,CAMK2N1,CCNB1IP1,CCNT1,CDC25A,CDC6,CDK11A,CEACAM1,CEP250,CIT,CLASP1,COL1A1,CSF3,CUL3,DDIT4,DDX11,DDX58,DHX9,DLG1,DOT1L,E2F2,EIF2AK2,EP300,FOSL2,FRS2,GADD45A,GAS2L1,GATA2,GATA3,GRK5,HBEGF,HIPK2,IFI16,IFIH1,IL1A,IL2RB,IRF7,IRF9,JAK3,KMT2A,KNTC1,KPNB1,LETM1,MAFB,MDK,MECOM,MET,MGAT4A,MITF,MTUS1,MX2,MYBBP1A,MYH10,MYH14,NF2,NFKB2,NRG1,NUMA1,…	116
Cancer,Dermatological Diseases and Conditions,Hematological Disease,Immunological Disease,Organismal Injury and Abnormalities	Non-Hodgkin cutaneous lymphoma	1.87e-06			CD48,IFI35,IFI44,IFI6,IFITM1,IL22RA1,IL2RB,IRF7,ISG15,ISG20,JAK3,MX1,OAS1,OAS2,OASL,ODC1,PLAAT4,POLA1,REL,RSAD2,STAT1,STAT5B,TP53	23
Cancer,Endocrine System Disorders,Organismal Injury and Abnormalities,Reproductive System Disease	Ovarian endometrioid carcinoma	1.9e-06			ADORA1,AGL,ANAPC2,ANKRD31,ARHGAP44,ARHGEF26,ASAP1,ATR,BCLAF1,BRCA1,CASD1,CEP295,CLDN3,CLDN7,CLIP3,COL1A2,DDX42,DIP2B,DNAH11,DNAH5,DNAJC2,DST,DUSP5,EIF5B,EP400,EPAS1,EVPL,FARP2,FBXO10,FGD3,FJX1,GTF3C3,HBEGF,HEATR1,HIVEP2,IL22RA1,IRF7,IRX4,ITCH,KAT6B,LETM1,LIMK1,LONRF3,LRPPRC,LTB4R,MAN2A2,MDC1,MED12,MSH6,MTR,MUC16,MYH10,MYH14,NEDD4,NF2,OAS3,ODC1,PASK,PCDHGA4,PCNT,PDE10A,PHF11,PHLDB2,PHRF1,PIK3CA,PI…	97
Cancer,Organismal Injury and Abnormalities,Renal and Urological Disease	Urothelial bladder carcinoma	1.91e-06			AJUBA,ALOX12B,ATR,ATXN2L,BRCA1,CDC6,CLIP3,DCN,DLX3,EIF4A2,ELF3,EP300,GATA3,GRIN2D,HSPB6,JAK3,KIF14,KMT2A,KRT80,MCM2,MECOM,MED12,MET,MMP13,MMP2,NF2,OVGP1,PIK3CA,PMS2,POLE,POLQ,RPTOR,SHANK3,SIN3A,SOCS1,STAG2,TIMP3,TP53,TPM2,ZIC5	40
Cancer,Neurological Disease,Organismal Injury and Abnormalities	Central nervous system neuroepithelial tumor	2.14e-06			ABHD12B,ADORA1,AGAP5 (includes others),AJUBA,ANKRD18B,ANKRD31,ANKRD34A,ANO2,ARHGAP5,ARID2,ATR,BRCA1,CCDC40,CD48,CDH8,CFTR,CHERP,CIPC,CLEC11A,COBL,COL1A1,COL1A2,COL3A1,CUL3,DCAF4,DST,EIF5B,ELOVL7,ENC1,ENG,EP300,FRK,FRMD4B,GALNT5,GRK5,GSTM5,HAVCR1,HIPK2,IFITM3,IL1A,ITGB3,JAK3,JPH1,KLF3,LIMK1,LY6E,MAPK8IP2,MAST3,MDK,MECOM,MED12,MERTK,MESP2,MET,MSH6,MUC16,MYO1D,NF2,NIPBL,NOM1,ODC1,OTUD4,PABPC1,PAIP2B…	108
Connective Tissue Disorders,Hereditary Disorder,Organismal Injury and Abnormalities	Hereditary connective tissue disorder	2.15e-06		0.765	ACTA2,ADRB1,AKR1B10,ANTXR2,ARFGEF2,ATR,BPTF,CCL5,CDC6,CEP120,CEP152,CIT,COL1A1,COL1A2,COL3A1,COL4A5,COL9A2,CPLANE1,CSF3,DCN,DDX58,DIAPH1,DST,EIF2S3,ELN,EP300,EXPH5,GPC1,HOXA11,IFIH1,IFT80,IL1A,ITGB3,KAT6A,KAT6B,KIF14,MAFB,MED12,MESP2,MET,MFAP4,MITF,MMP13,MMP2,MR1,MTHFD1,MYH10,NALCN,NEDD4,NFKB2,OCLN,ORC1,PCNT,PDE4D,POLA1,POLE,POLR1A,PPIB,PPP1R15B,PTPN11,PTPRF,RIN2,SAMD9,SPARC,STRN3,SYNPO,TFAP2A,TG…	75
Cancer,Neurological Disease,Organismal Injury and Abnormalities	Central nervous system solid tumor	2.34e-06		1.481	ABHD12B,ADORA1,AGAP5 (includes others),AJUBA,ANKRD18B,ANKRD31,ANKRD34A,ANO2,ARHGAP5,ARID2,ATR,AXIN1,BRCA1,CCDC40,CD48,CDH8,CFTR,CHERP,CIPC,CLEC11A,COBL,COL1A1,COL1A2,COL3A1,CSF3,CUL3,DCAF4,DST,EIF5B,ELOVL7,ENC1,ENG,EP300,FOSL2,FRK,FRMD4B,GALNT5,GEMIN5,GRK5,GSTM5,HAVCR1,HBEGF,HIPK2,IFITM3,IL18,IL1A,ITGB3,JAK3,JPH1,KAT6B,KDM4C,KLF3,LETM1,LIMK1,LURAP1L,LY6E,MAPK8IP2,MAST3,MDK,MECOM,MED12,MERTK,MESP2…	135
Inflammatory Response,Organismal Injury and Abnormalities	Inflammation of organ	2.39e-06		0.078	ABCC2,ACTA2,ADORA1,ADORA2A,ADRA1B,ADRB1,AMPD3,ATF3,B2M,B3GNT6,BIRC3,CCL28,CCL5,CD48,CD68,CDC25A,CEACAM1,CFTR,CHM,CIPC,COL1A1,COL1A2,COL3A1,COL4A5,CSF3,CTRC,CTSL,CXCL5,CYP1A1,DCN,DDIT4,DDX58,DEFB103A/DEFB103B,DIAPH1,DUSP5,E2F2,EIF2AK2,ELF3,EP300,EPAS1,EPSTI1,F3,FBXO32,FCGR1A,FRMD4B,GABRE,GADD45A,GATA2,GATA3,GCH1,GRIN2D,HAVCR1,HBEGF,HCAR1,HNRNPAB,IFI27,IFI35,IFI44,IFIH1,IFITM3,IL18,IL1A,IL2RB,IL31R…	144
Inflammatory Response	Inflammation of absolute anatomical region	2.6e-06		-0.084	ABCC2,ACTA2,ADORA1,ADORA2A,ADRA1B,ADRB1,AMPD3,ATF3,B2M,B3GNT6,BIRC3,CCL28,CCL5,CD48,CD68,CEACAM1,CFTR,CIPC,COL1A1,COL1A2,COL3A1,COL4A5,CSF3,CTRC,CTSL,CXCL5,CYP1A1,DAPK1,DCN,DDIT4,DDX58,DUSP5,E2F2,ELF3,EP300,EPAS1,EPSTI1,F3,FBXO32,FCGR1A,FRMD4B,GABRE,GADD45A,GATA2,GCH1,GRIN2D,HAVCR1,HBEGF,HCAR1,HNRNPAB,IFI35,IFI44,IFIH1,IFITM3,IL18,IL1A,IL2RB,IL5,IRF7,IRF9,ISG15,ISG20,ITCH,ITGB3,JAK3,KAT2A,KLF3,LT…	127
Cell Cycle	G1 phase	2.61e-06	Decreased	-2.006	AMH,ATF3,BCR,BRCA1,CABLES1,CAMKK1,CDC25A,CDC6,CSF3,CUL3,DCN,DLX3,DOT1L,E2F2,EIF2AK2,ELF4,EP300,EP400,GADD45A,GATA3,HASPIN,HAVCR1,IFI16,IL1A,ITGA5,JAK3,KAT2A,KMT2A,KPNB1,MAP2K3,MCM2,MCM4,MET,MX2,NOCT,NRG1,ORC1,PHF8,PIM1,PLAGL2,PLK2,PLSCR1,POLA1,POLE,PPARGC1B,PRKCE,PRPF8,RCC1,REL,RPS6KA3,RPTOR,SPTAN1,STING1,TFAP2C,TFCP2,TP53,USP36	57
Cancer,Hematological Disease,Immunological Disease,Organismal Injury and Abnormalities	Low-grade lymphoma	2.75e-06			ARHGAP42,BCLAF1,BICC1,BIRC3,CEP250,CEP350,CNOT1,COL3A1,COL4A5,CPSF7,CTSL,DDX58,DGKD,DIAPH1,DLG1,DNAH5,DST,E2F2,EP300,FANCB,GSE1,HSF4,IL2RB,ITGB3,KAT6A,MED12,MGA,MMP2,MUC16,MYOF,NUP98,PAPLN,PKP2,POLA1,POLE,POLR3B,PSMB8,PSMB9,PTPN11,PTPRF,PTPRZ1,RBCK1,RCC1,RPTOR,RTN2,S100A4,SBNO1,SEC14L1,SEMA3E,SHANK3,SHROOM2,SHROOM3,SMCO2,SPEN,STAT5B,TEX14,TFCP2,TNIK,TP53,TRAF1,TRIM55,TRIP12,TTC21B,USP2,VAV3,VWDE,…	68
Cancer,Organismal Injury and Abnormalities	Soft tissue neoplasm	2.81e-06		0.523	ABL2,ADAMTSL3,AHCTF1,ALDH1A3,ALOX12B,AMH,ARFGEF1,ARID2,BRCA1,CARD16,CCDC40,CCNT1,CD48,CDH8,CFTR,CHERP,CLDN3,CNNM1,COL3A1,CPAMD8,CTSL,DAPK1,DCN,DDHD1,DDX11,DDX58,DGKD,DNAH5,DOT1L,DST,ENG,EP300,FGD3,FMNL2,FRK,GABRE,GPC1,GPRC5D,GSE1,GTF3C4,IFI35,IL18,IL2RB,IL5,KLF3,LARP1,LIMD1,LIMK1,LRPPRC,MED12,MERTK,MET,METTL16,MIS18BP1,MITF,MMP2,MTR,MUC16,MYBBP1A,MYH14,MYO1D,NBAS,NF2,OASL,OVGP1,PARP10,PDP2,PFAS,P…	110
Cell Death and Survival	Necrosis	2.93e-06		0.465	ABL2,ACACA,ADAMTS16,ADORA1,ADORA2A,ADRB1,AGA,AGTPBP1,AIM2,AKR1B10,AMH,ANTXR2,ATF3,ATR,AXIN1,B2M,B3GALT5,BACH1,BCLAF1,BCR,BIRC3,BRCA1,CABLES1,CCL5,CCN3,CCNT1,CD48,CDC25A,CDC6,CDK11A,CEACAM1,CIDEB,CIT,CLASP1,CLEC11A,COL1A1,CSF3,CUL3,CYP26A1,DAPK1,DCN,DDIT4,DDN,DDX58,DGCR8,DGKD,DHX58,DHX9,DOT1L,DST,DUSP5,E2F2,EIF2AK2,EIF4B,EIF5B,ENC1,ENG,EP300,EP400,EPAS1,F3,FBXO32,FCGR1A,FOSB,GABRE,GADD45A,GALNT5,G…	256
Cancer,Hematological Disease,Immunological Disease,Organismal Injury and Abnormalities	Acute myeloid leukemia	2.99e-06		-1.091	ABHD12B,ABL2,ADORA1,ADORA2A,ADRA1B,ADRB1,AGAP5 (includes others),AKAP13,ALOX12B,ANAPC1,ANGPTL4,ANKHD1/ANKHD1-EIF4EBP3,ANKRD18B,ANKRD22,ANO2,APLP1,ARHGEF5,ARID2,AZIN1,BAAT,BCLAF1,BCR,BRCA1,BRPF1,CCDC40,CD48,CD68,CDH8,CELSR3,CLASP1,CLDN7,CLUH,COL4A5,CPLANE1,CSF3,CYP1A1,CYP26A1,DDX11,DHX9,DNAH11,DNAH2,DNAH5,DOT1L,DST,EIF2AK2,EP300,EPB41L4B,F3,FAM83G,FARP2,FBXO10,FGD3,GABRE,GADD45A,GALNT9,GATA2,GATA3…	158
Cell Cycle,Gene Expression	Binding of DNA	3.03e-06		-0.941	AMH,ATF3,BRCA1,CSF3,CXCL5,CYP1A1,DDX58,ELF4,EP300,EPAS1,F3,FOSB,FOSL2,FOXP4,GATA2,GATA3,GRHL2,GSTM5,HBEGF,HIPK2,HIVEP2,HOXA11,IFI16,IL18,IL1A,IL2RB,IL5,IRF7,IRF9,ITGA5,ITGB3,JAK3,MAP3K14,MGA,NFKB2,NRG1,OAS1,PELP1,PGF,PPIB,PPP1CC,PRKCE,PTPN11,REL,RELB,RPS6KA3,SET,SFPQ,SOCS1,SP100,STAT1,TFAP2A,TFAP2C,TFCP2,TGFB2,TONSL,TP53,TWNK,TXLNG,UBN1,UCN,ZBTB10	62
Organismal Development	Abnormal morphology of body cavity	3.08e-06			ABL2,ACP3,ACTG2,ADORA1,ADORA2A,ADRA1B,ADRB1,AGA,AGL,AIM2,AKAP13,ANGPTL4,ANKRD17,ANTXR2,ARHGAP5,ATF3,ATXN1L,AZGP1,B2M,BCR,BIRC3,BRCA1,CABLES1,CCN3,CCNT1,CEACAM1,CELSR3,CFTR,CLDN7,COL3A1,COL9A2,CSF3,CYP1A1,CYP26A1,DAPK1,DCN,DDX58,DGCR8,DHX58,DIAPH1,DLG1,DLX3,DNAH11,DOK7,DOT1L,DUSP5,E2F2,ELN,EP300,EPAS1,F3,FAM20A,FBXO32,FOXP4,GADD45A,GATA2,GCSAM,GRK5,HBEGF,HIVEP2,HOXA11,IL18,IL2RB,IL5,IRX4,ITGB3,JAG…	153
Cancer,Endocrine System Disorders,Organismal Injury and Abnormalities,Reproductive System Disease	Serous adenocarcinoma in ovary	3.16e-06			ABCC2,ABHD12B,ACP3,ADAMTSL3,ADORA2A,ANKRD36C,ARID2,ATR,AZGP1,B2M,BCLAF1,BRCA1,BRPF3,CELSR3,CEP120,CEP152,CLASP1,CLUH,CNOT1,COL3A1,CREB5,DCAF16,DHX8,DIAPH1,DIP2B,DNAH11,DNAH2,DNAH5,DOCK3,EXOC3L4,FAM234B,FARP1,FOSL2,IFI44L,IFIH1,KDM4C,KNTC1,KRT86,MAP3K21,MET,MGA,MSH6,MUC16,MYO9B,MYOF,NEDD4L,NF2,NUP50,OTUD4,PHF3,PIK3CA,PLAGL2,PLEKHA7,PTPN11,QSOX1,TNFRSF9,TP53,TRPC6,UBA7,USP18,VPS13B,WDR35,ZC3H12C,ZM…	66
Cell Signaling	Protein kinase cascade	3.31e-06	Decreased	-2.149	ABL2,ADORA1,ADRA1B,AJUBA,AKAP13,ALOX12B,ANKRD17,AXIN1,BIRC3,CARD16,CCL5,CEACAM1,CUL3,DDX21,DLG1,DOT1L,DUSP5,EIF2AK2,FRS2,GADD45A,HBEGF,HIPK2,IFIT5,IL18,IL1A,IL2RB,IL31RA,IL5,ITCH,JAK3,JCAD,MAP2K3,MAP3K14,MAPK8IP2,MARVELD3,MECOM,MET,NEFL,NF2,NRG1,PRDM11,PRDM15,PRKCE,PSMB8,PSMB9,RASAL2,RASSF2,RBCK1,REL,S100A4,SETX,SH3RF2,SHANK3,SOCS1,SPTAN1,SPTBN1,STAT1,STAT5B,TNIK,TNIP1,TRAF4,WWC1	62
Infectious Diseases	Replication of Flaviviridae	3.65e-06	Decreased	-3.816	BST2,CYP1A1,DDX58,DGCR8,EIF2AK2,IFI27,IFI6,IFIT1,IFITM1,IFITM3,ISG15,OASL,RSAD2,STING1,UBA7,UBE2L6,XRN1	17
Cell Morphology,Cellular Assembly and Organization,Cellular Function and Maintenance	Formation of cellular protrusions	3.75e-06	Decreased	-3.906	ABL2,ABLIM1,ACACA,ADGRF1,ADORA2A,AGTPBP1,AJUBA,ANAPC2,ANGPTL4,ARFGEF1,ARHGAP5,ARHGAP8/PRR5-ARHGAP8,ARHGEF5,ARHGEF7,ASAP1,ATF3,AXIN1,BCR,CAMSAP1,CAMSAP2,CCL5,CCN3,CEACAM1,CELSR3,CEP120,CEP250,CEP83,CIT,CPLANE1,DIAPH1,DLG1,DNAAF1,DNAH5,DYNLT1,ENC1,ENG,F3,FARP1,FARP2,FGD3,FNBP1,FNBP1L,GATA3,GNAL,GPM6A,GRK5,IFT80,IL18,ITGB3,KIF3B,LIMK1,LRP8,MAPK8IP2,MAST3,MET,MPP1,MPP5,MT2A,MYH10,MYO6,NANOS1,NEFL,NEU…	105
Cell Death and Survival	Apoptosis of breast cancer cell lines	3.79e-06		1.008	ABL2,AIM2,AMH,B2M,B3GALT5,BACH1,BIRC3,BRCA1,CEACAM1,CYP26A1,DDIT4,EP300,FBXO32,GADD45A,GRHL2,HOXA11,HOXC6,IFI16,ITCH,MAP2K3,MOAP1,MUC16,MYBBP1A,MYO6,NRG1,OAS3,PDE4D,PELP1,PI3,PIK3CA,PIM1,PLK2,PRKCE,STAT1,TFAP2A,TFAP2C,TGFB2,TIMP4,TP53,UGCG,WWC1,XPO1	42
Inflammatory Response	Inflammation of body cavity	4.03e-06		0.652	ABCC2,ACTA2,ADORA1,ADORA2A,ADRA1B,ADRB1,AMPD3,ATF3,B2M,B3GNT6,BIRC3,CCL28,CCL5,CD48,CEACAM1,CFTR,CIPC,COL1A1,COL1A2,COL3A1,COL4A5,CTRC,CTSL,CXCL5,CYP1A1,DCN,DDIT4,DDX58,DUSP5,E2F2,ELF3,EP300,EPAS1,EPSTI1,F3,FBXO32,FCGR1A,FRMD4B,GABRE,GADD45A,GATA2,GCH1,GRIN2D,HAVCR1,HBEGF,HCAR1,HNRNPAB,IFI44,IFIH1,IL18,IL1A,IL2RB,IL5,IRF7,ISG20,ITCH,ITGB3,JAK3,KLF3,LTB,LTB4R,MAP2K3,MAP3K14,MDK,MERTK,MMP13,MMP2,MT…	108
Cancer,Organismal Injury and Abnormalities,Reproductive System Disease	Uterine carcinosarcoma	4.66e-06			ALOX12B,ARFGEF1,ARID2,CARD16,CCDC40,CCNT1,CD48,CFTR,CLDN3,CNNM1,COL3A1,DAPK1,DDHD1,DDX11,DNAH5,DOT1L,ENG,FMNL2,GABRE,GPC1,IL2RB,LARP1,LIMD1,MED12,MET,METTL16,MIS18BP1,MITF,MMP2,MTR,MUC16,MYH14,MYO1D,NBAS,OASL,PDP2,PFAS,PIK3CA,POLE,PPP1R15B,RHOBTB3,SAMD9,SCAPER,SEMA3E,SERPINB3,SFPQ,SGMS1,STAT1,SYNPO,TAF4B,TASOR,TIAM1,TIMP3,TJP1,TNFAIP2,TP53,UTP20,UTRN,VCPIP1,VWDE,XPO1,ZDHHC11,ZNF335,ZNF598	64
Cancer,Neurological Disease,Organismal Injury and Abnormalities	Central nervous system cancer	5.3e-06			ABHD12B,ADORA1,AGAP5 (includes others),AJUBA,ANKRD18B,ANKRD31,ANKRD34A,ANO2,ARHGAP5,ARID2,ATR,AXIN1,BRCA1,CCDC40,CD48,CDH8,CIPC,CLEC11A,COBL,COL1A1,COL1A2,COL3A1,CUL3,DCAF4,DST,EIF5B,ELOVL7,ENC1,ENG,EP300,FOSL2,FRK,FRMD4B,GALNT5,GEMIN5,GRK5,GSTM5,HAVCR1,HIPK2,IFITM3,IL1A,ITGB3,JAK3,JPH1,KDM4C,KLF3,LIMK1,LURAP1L,LY6E,MAPK8IP2,MAST3,MDK,MECOM,MED12,MERTK,MESP2,MET,MIB1,MMP2,MSH6,MUC16,MYO1D,NF2,NIP…	117
Infectious Diseases,Organismal Injury and Abnormalities	Infection of embryonic cell lines	5.65e-06	Decreased	-5.008	AHCTF1,AKAP13,ANAPC2,CAD,CLIP3,EIF2AK2,ENC1,EP300,EPAS1,GINS4,HAVCR1,IFITM1,IFITM3,ISG20,KAT6A,KPNB1,MT2A,MYO1F,MYOF,NCOA6,NEDD4,NUP214,NUP50,NUP98,PARP9,PDZD8,PLAAT4,POLR2A,PRPF8,REPIN1,RSAD2,SPEN,SRSF6,TRIM55,ZNF292,ZNF594	36
Cell Cycle	Interphase	5.73e-06	Decreased	-2.428	AJUBA,AMH,ATF3,ATR,BCR,BRCA1,CABLES1,CAMK2N1,CAMKK1,CDC25A,CDC6,CEP152,CEP250,CIT,CLASP1,CSF3,CUL3,DCN,DLX3,DOT1L,E2F2,EIF2AK2,ELF4,EP300,EP400,FAM168A,FBXW11,GADD45A,GATA3,GNL3L,GPC1,HASPIN,HAVCR1,HBEGF,IFI16,IL1A,ITGA5,JAK3,KAT2A,KMT2A,KPNB1,LIMK1,MAP2K3,MCM2,MCM4,MDC1,MET,MSH5,MUC16,MX2,MYBL1,NOCT,NRG1,ORC1,PCNT,PHF8,PIM1,PLAC8,PLAGL2,PLAUR,PLK2,PLSCR1,POLA1,POLD4,POLE,POLR2A,PPARGC1B,PPIF,PRK…	86
Cancer,Organismal Injury and Abnormalities,Respiratory Disease	Laryngeal squamous cell carcinoma	5.81e-06			ADORA1,ALOX12B,AP1G1,ARID2,ARMC5,ATG2A,BAAT,BICC1,CELSR3,CEP250,CEP350,CFTR,CLASP1,COL1A2,DNAH5,DOCK3,DZIP3,EML4,EPB41L2,FOSL2,FRS2,GALNT5,GPM6A,HEATR1,HIPK2,IKZF2,KMT2A,LRPPRC,LYPD1,MAST3,MTR,MUC16,MYH10,MYO9B,OPA1,PCNT,PHF8,PIK3CA,RIPK4,RPTOR,SEC14L4,SLC12A2,SLC9A2,SMG1,SPEN,SUCO,SYNPO,SYT16,TEX14,TLL1,TMEM212,TMTC2,TNIK,TP53,TRANK1,TWNK,VWDE,ZNF426,ZNF560	59
Cancer,Organismal Injury and Abnormalities,Respiratory Disease	Laryngeal cancer	5.82e-06			ADORA1,ALOX12B,AP1G1,ARID2,ARMC5,ATG2A,BAAT,BICC1,CELSR3,CEP250,CEP350,CFTR,CLASP1,COL1A2,DNAH5,DOCK3,DZIP3,EML4,EPB41L2,FOSL2,FRS2,GALNT5,GPM6A,HEATR1,HIPK2,IKZF2,KMT2A,LRPPRC,LYPD1,MAST3,MET,MTR,MUC16,MYH10,MYO9B,OPA1,PCNT,PHF8,PIK3CA,RIPK4,RPTOR,SEC14L4,SLC12A2,SLC9A2,SMG1,SPEN,SUCO,SYNPO,SYT16,TEX14,TLL1,TMEM212,TMTC2,TNIK,TP53,TRANK1,TWNK,VWDE,ZNF426,ZNF560	60
Infectious Diseases	Infection of epithelial cell lines	6.08e-06	Decreased	-4.907	AHCTF1,AKAP13,ANAPC2,CAD,CLIP3,EIF2AK2,ENC1,EP300,EPAS1,GINS4,HAVCR1,IFITM1,IFITM3,ISG20,KAT6A,KPNB1,MT2A,MYO1F,MYOF,NCOA6,NEDD4,NUP214,NUP50,NUP98,PARP9,PDZD8,POLR2A,PRPF8,REPIN1,RSAD2,SPEN,SRSF6,TRIM55,ZNF292,ZNF594	35
Cancer,Organismal Injury and Abnormalities	Adenosquamous carcinoma	7.53e-06			ADORA1,AGL,ANAPC2,ANKRD31,ARHGAP44,ARHGEF26,ASAP1,BCLAF1,BRCA1,CASD1,CEP295,CLIP3,COL1A2,DDX42,DIP2B,DNAH11,DNAH5,DNAJC2,DST,DUSP5,EIF5B,EP400,EPAS1,EVPL,FARP2,FBXO10,FGD3,FJX1,GTF3C3,HBEGF,HEATR1,HIVEP2,IL22RA1,IRF7,IRX4,ITCH,KAT6B,LETM1,LIMK1,LONRF3,LRPPRC,LTB4R,MAN2A2,MDC1,MED12,MET,MTR,MUC16,MYH10,MYH14,NEDD4,NF2,OAS3,ODC1,PASK,PCDHGA4,PCNT,PDE10A,PHF11,PHLDB2,PHRF1,PIK3CA,PIP4K2A,PKP2,PLAAT5…	94
Developmental Disorder,Hereditary Disorder,Neurological Disease,Organismal Injury and Abnormalities	Autosomal dominant mental retardation	7.66e-06			ARID2,BPTF,BRPF1,COL1A1,DIP2B,EP300,HIVEP2,KANSL1,KAT6A,KAT6B,KCNQ5,KMT2A,MBD5,NUS1,POGZ,SET,SIN3A,TRIO,TRIP12	19
Cancer,Endocrine System Disorders,Organismal Injury and Abnormalities,Reproductive System Disease	Adenosquamous ovarian carcinoma	8e-06			ADORA1,AGL,ANAPC2,ANKRD31,ARHGAP44,ARHGEF26,ASAP1,BCLAF1,BRCA1,CASD1,CEP295,CLIP3,COL1A2,DDX42,DIP2B,DNAH11,DNAH5,DNAJC2,DST,DUSP5,EIF5B,EP400,EPAS1,EVPL,FARP2,FBXO10,FGD3,FJX1,GTF3C3,HBEGF,HEATR1,HIVEP2,IL22RA1,IRF7,IRX4,ITCH,KAT6B,LETM1,LIMK1,LONRF3,LRPPRC,LTB4R,MAN2A2,MDC1,MED12,MTR,MUC16,MYH10,MYH14,NEDD4,NF2,OAS3,ODC1,PASK,PCDHGA4,PCNT,PDE10A,PHF11,PHLDB2,PHRF1,PIP4K2A,PKP2,PLAAT5,POLQ,PTPN1…	91
Cancer,Organismal Injury and Abnormalities	Pelvic serous carcinoma	8.51e-06			ATR,B2M,BCR,BRCA1,CARD16,CLDN3,CLDN7,CMTM4,EIF4A2,ELF3,EP300,F3,GATA3,GSTM5,JAG2,KRT7,LRP8,MAP3K21,MECOM,MET,MUC16,OCLN,PIK3CA,POLQ,PTPN11,SIN3A,STAG2,STAT1,TIMP3,TP53,USP7,VAV3	32
Cancer,Organismal Injury and Abnormalities	Malignant neoplasm of connective or soft tissue of abdomen	8.62e-06			ALOX12B,ARFGEF1,ARID2,BRCA1,CARD16,CCDC40,CCNT1,CD48,CFTR,CLDN3,CNNM1,COL3A1,CTSL,DAPK1,DDHD1,DDX11,DNAH5,DOT1L,ENG,FMNL2,GABRE,GPC1,IL2RB,LARP1,LIMD1,MED12,MET,METTL16,MIS18BP1,MITF,MMP2,MTR,MUC16,MYH14,MYO1D,NBAS,OASL,PDP2,PFAS,PIK3CA,POLE,POU3F1,PPP1R15B,RHOBTB3,SAMD9,SCAPER,SEMA3E,SERPINB3,SFPQ,SGMS1,STAT1,SYNPO,TAF4B,TASOR,TIAM1,TIMP3,TJP1,TNFAIP2,TP53,UTP20,UTRN,VCPIP1,VWDE,XPO1,ZDHHC11,ZNF…	67
Cancer,Organismal Injury and Abnormalities	Secondary tumor	8.87e-06		-1.527	ABL2,ABLIM1,ACTA2,ANGPTL4,ANTXR2,ARID2,ASAP1,ATF3,ATR,B2M,BACH1,BHLHE41,BRCA1,CCL5,CD48,CDC25A,CLDN3,CSF3,CXCL5,CYP26A1,DAPK1,DDX58,DLX3,DOT1L,ENG,EP300,EPAS1,EPB41L4B,EPSTI1,F3,FCGR1A,FNBP1L,FRK,FRS2,GADD45A,GATA2,GATA3,GCH1,GRHL2,GRIN2D,GSE1,HCAR1,HIC1,HNRNPAB,HOXC6,IFITM3,IKZF2,IL18,IL1A,IL2RB,IL5,IRF7,ITGB3,KAT6A,KMT2A,LIMK1,LTB,MAFB,MAGI1,MAP2K3,MDC1,MECOM,MED12,MERTK,MET,MITF,MLH3,MMP2,MSH6…	109
Cancer,Organismal Injury and Abnormalities,Reproductive System Disease	Malignant mixed Mullerian tumor in endometrium	8.88e-06			ALOX12B,ARFGEF1,ARID2,CARD16,CCDC40,CCNT1,CD48,CFTR,CNNM1,COL3A1,DAPK1,DDHD1,DDX11,DNAH5,DOT1L,ENG,FMNL2,GABRE,GPC1,IL2RB,LARP1,LIMD1,MED12,MET,METTL16,MIS18BP1,MITF,MMP2,MTR,MUC16,MYH14,MYO1D,NBAS,OASL,PDP2,PFAS,PIK3CA,PPP1R15B,RHOBTB3,SAMD9,SCAPER,SEMA3E,SERPINB3,SFPQ,SGMS1,STAT1,SYNPO,TAF4B,TASOR,TIAM1,TIMP3,TJP1,TNFAIP2,TP53,UTP20,UTRN,VCPIP1,VWDE,ZDHHC11,ZNF335,ZNF598	61
Organismal Injury and Abnormalities,Reproductive System Disease	Benign pelvic disease	9.11e-06			ACTA2,ADRA1B,ADRB1,ALDH1A3,APLP1,ARFGEF2,ASB5,ATRNL1,BRCA1,CABLES1,CCL28,CD48,CD68,CLUH,CXCL5,CYP26A1,DCN,DST,FOSL2,FRMD4B,GATA3,GPM6A,GREM1,IFI44L,IFIH1,IFIT1,IFIT3,IL18,IL1A,IL2RB,ISG20,ITGB3,KLF3,LTB4R,MAN2A2,MCM4,MED12,MMP2,MMP24,MR1,MT1G,MYH10,NUP50,OGFR,OVGP1,PDE4D,PIK3CA,PLAUR,PLK2,POU3F1,PRPF8,PTPN11,QSOX1,REL,RELB,SMG1,SPSB1,TFAP2A,TFAP2C,TGFB2,TP53,TRAF1,TRIO,UGCG,UTRN,XAF1	66
Cancer,Organismal Injury and Abnormalities,Reproductive System Disease	Sarcoma of the female genital tract	9.24e-06			ALOX12B,ARFGEF1,ARID2,CARD16,CCDC40,CCNT1,CD48,CFTR,CLDN3,CNNM1,COL3A1,CTSL,DAPK1,DDHD1,DDX11,DNAH5,DOT1L,ENG,FMNL2,GABRE,GPC1,IL2RB,LARP1,LIMD1,MED12,MET,METTL16,MIS18BP1,MITF,MMP2,MTR,MUC16,MYH14,MYO1D,NBAS,OASL,PDP2,PFAS,PIK3CA,POLE,PPP1R15B,RHOBTB3,SAMD9,SCAPER,SEMA3E,SERPINB3,SFPQ,SGMS1,STAT1,SYNPO,TAF4B,TASOR,TIAM1,TIMP3,TJP1,TNFAIP2,TP53,UTP20,UTRN,VCPIP1,VWDE,XPO1,ZDHHC11,ZNF335,ZNF598	65
Dermatological Diseases and Conditions,Organismal Injury and Abnormalities	Psoriasis	9.37e-06			ACP3,ACTA2,ALDH1A3,ALOX12B,AP1S3,APOL6,CAMK2N1,COL1A2,CTSL,CXCL5,CYP1A1,DAGLA,DDX58,DEFB103A/DEFB103B,DLX3,EPSTI1,FCGR1A,GATA3,IFI16,IFI27,IFI35,IFI44,IFI44L,IFI6,IFIT1,IFIT3,IFITM1,IL18,IL1A,IL22RA1,IRF7,ISG15,ISG20,ITGA5,JAK3,KPNB1,LAMP3,LGALS3BP,MAP2K3,MMP2,MTR,MX1,OAS1,OAS2,OAS3,OASL,ODC1,PARP9,PDE4D,PDZK1IP1,PGF,PI3,PLSCR1,PPIF,PRKCE,RSAD2,SAMD9,SERPINB3,SOCS1,SPTAN1,STAT1,TIMP3,TNIP1,UBE2L6	64
Cancer,Hematological Disease,Immunological Disease,Organismal Injury and Abnormalities	Diffuse B-cell lymphoma	9.68e-06			ABL2,ADAMTSL3,ADORA1,ADORA2A,ARHGAP42,ATF3,B2M,BICC1,BIRC3,CAD,CEP250,CEP350,CNOT1,COL3A1,COL4A5,CPSF7,DDX10,DDX58,DGKD,DLG1,DNAH5,DST,EP300,FANCB,GSE1,KIAA0100,KMT2A,LRRC37A3 (includes others),MED12,MGA,MUC16,MYOF,NCOA6,NUP98,PAPLN,PIK3CA,PIM1,PLEKHA7,POLA1,POLE,POLR3B,PPAT,PTPN11,RBCK1,REL,RTN2,S100A4,SBNO1,SEC14L1,SEMA3E,SHANK3,SHROOM2,SHROOM3,SMCO2,SOCS1,SPEN,STAT5B,TAF4B,TEX14,TFCP2,TNFRSF9,…	75
Developmental Disorder,Hereditary Disorder,Neurological Disease,Organismal Injury and Abnormalities	Dominant mental retardation	9.88e-06			ARID2,BPTF,BRPF1,COL1A1,DIP2B,EP300,HIVEP2,KANSL1,KAT6A,KAT6B,KCNQ5,KMT2A,MBD5,NUS1,POGZ,RPS6KA3,SET,SIN3A,TRIO,TRIP12	20
Cancer,Organismal Injury and Abnormalities	Soft tissue sarcoma of trunk	1.04e-05			ALOX12B,ARFGEF1,ARID2,CARD16,CCDC40,CCNT1,CD48,CFTR,CLDN3,CNNM1,COL3A1,DAPK1,DDHD1,DDX11,DNAH5,DOT1L,ENG,FMNL2,GABRE,GPC1,IL2RB,LARP1,LIMD1,MED12,MET,METTL16,MIS18BP1,MITF,MMP2,MTR,MUC16,MYH14,MYO1D,NBAS,OASL,PDP2,PFAS,PIK3CA,POLE,POU3F1,PPP1R15B,RHOBTB3,SAMD9,SCAPER,SEMA3E,SERPINB3,SFPQ,SGMS1,STAT1,SYNPO,TAF4B,TASOR,TIAM1,TIMP3,TJP1,TNFAIP2,TP53,UTP20,UTRN,VCPIP1,VWDE,XPO1,ZDHHC11,ZNF335,ZNF598	65
Cancer,Organismal Injury and Abnormalities	Mixed cell carcinoma	1.16e-05			ADORA1,AGL,ANAPC2,ANKRD31,ARHGAP44,ARHGEF26,ARID2,ASAP1,ATR,BCLAF1,BRCA1,CASD1,CEP295,CLIP3,COL1A2,DDX42,DIP2B,DNAH11,DNAH5,DNAJC2,DST,DUSP5,EIF5B,EP400,EPAS1,EVPL,FARP2,FBXO10,FGD3,FJX1,GTF3C3,HBEGF,HEATR1,HIVEP2,IL22RA1,IRF7,IRX4,ITCH,KAT6B,LETM1,LIMK1,LONRF3,LRPPRC,LTB4R,MAN2A2,MDC1,MED12,MET,MTR,MUC16,MYH10,MYH14,NEDD4,NF2,OAS3,ODC1,PASK,PCDHGA4,PCNT,PDE10A,PHF11,PHLDB2,PHRF1,PIK3CA,PIP4K2A,P…	96
Cell Death and Survival	Cell death of breast cancer cell lines	1.19e-05		0.863	ABL2,AIM2,AMH,B2M,B3GALT5,BACH1,BIRC3,BRCA1,CDC6,CEACAM1,CYP26A1,DDIT4,DHX9,EIF4B,EP300,FBXO32,GADD45A,GRHL2,HOXA11,HOXC6,IFI16,ITCH,MAP2K3,MOAP1,MUC16,MYBBP1A,MYO6,NRG1,OAS3,ODC1,PDE4D,PELP1,PI3,PIK3CA,PIM1,PLK2,PRKCE,STAT1,TFAP2A,TFAP2C,TGFB2,TIMP4,TP53,UGCG,WWC1,XPO1	46
Infectious Diseases	Infection of tumor cell lines	1.26e-05	Decreased	-4.297	ACP3,ANAPC2,BCLAF1,BCR,BRCA1,CARD16,CCNT1,DDX10,DDX58,DIAPH1,EIF2AK2,EIF3A,EPAS1,FBXW11,FRS2,HAVCR1,HEATR1,HIP1R,IFI35,IFITM1,IFITM3,IL1A,KAT2A,LRRC8D,MAP3K14,MAP3K9,MAPK8IP2,MECOM,MERTK,MR1,NF2,NOP56,NUP155,NUP98,OCLN,PHF3,PKD1L2,PPIB,PPP1R15B,RGPD4 (includes others),RND1,RPS6KA3,RTN2,SAMD9,SEC14L1,SENP5,SLC46A1,SP110,SPTAN1,SPTBN1,STAT1,TOX,TRIM55,UBQLN4,VPS53,XPO1,ZBTB2	57
Cell Cycle	G1/S phase transition	1.27e-05		-1.839	ATF3,CABLES1,CDC25A,CDC6,CUL3,DLX3,EIF2AK2,ELF4,EP300,GADD45A,GATA3,IFI16,KAT2A,KMT2A,MAP2K3,MCM2,MCM4,MET,MX2,NRG1,ORC1,PHF8,PLAGL2,PLK2,POLA1,POLE,PPARGC1B,PRKCE,RCC1,RPTOR,TFAP2C,TFCP2,TP53	33
Cancer,Organismal Injury and Abnormalities	Neoplasia of tumor cell lines	1.28e-05		-1.511	ABLIM1,ALDH1A3,ANGPTL4,ANTXR2,ASAP1,ATF3,B2M,BACH1,BRCA1,CDC25A,CEACAM1,CSF3,CXCL5,CYP26A1,DAPK1,EPAS1,F3,FNBP1L,GRHL2,GSE1,HCAR1,HNRNPAB,IL18,IRF7,JAG2,KMT2A,MAGI1,MAP2K3,MET,MTUS1,MUC16,NF2,PDZK1IP1,PGF,PIM1,PLAUR,PTPN11,PTPRZ1,RPS6KA3,RPTOR,S100A4,SENP1,STAT1,TBC1D16,TFCP2,TIMP3,TP53,TRAF4,TRIM35,UTRN,VAV3	51
Infectious Diseases	Replication of Hepatitis C virus	1.33e-05	Decreased	-3.593	BST2,CYP1A1,DDX58,DGCR8,EIF2AK2,IFI27,IFI6,IFIT1,IFITM1,IFITM3,ISG15,RSAD2,UBA7,UBE2L6,XRN1	15
Cancer,Endocrine System Disorders,Organismal Injury and Abnormalities,Reproductive System Disease	Mixed ovarian carcinoma	1.34e-05			ADORA1,AGL,ANAPC2,ANKRD31,ARHGAP44,ARHGEF26,ASAP1,ATR,BCLAF1,BRCA1,CASD1,CEP295,CLIP3,COL1A2,DDX42,DIP2B,DNAH11,DNAH5,DNAJC2,DST,DUSP5,EIF5B,EP400,EPAS1,EVPL,FARP2,FBXO10,FGD3,FJX1,GTF3C3,HBEGF,HEATR1,HIVEP2,IL22RA1,IRF7,IRX4,ITCH,KAT6B,LETM1,LIMK1,LONRF3,LRPPRC,LTB4R,MAN2A2,MDC1,MED12,MTR,MUC16,MYH10,MYH14,NEDD4,NF2,OAS3,ODC1,PASK,PCDHGA4,PCNT,PDE10A,PHF11,PHLDB2,PHRF1,PIP4K2A,PKP2,PLAAT5,POLQ,P…	92
Organismal Development,Organismal Injury and Abnormalities	Abnormal morphology of abdomen	1.43e-05			ABL2,ACP3,ACTG2,ADRA1B,AGA,AGL,AIM2,AKAP13,ANGPTL4,ANTXR2,ARFGEF2,ATF3,AZGP1,B2M,BCR,BRCA1,CABLES1,CCN3,CEACAM1,CELSR3,CFTR,CLDN7,COL3A1,CSF3,CYP1A1,CYP26A1,DAPK1,DCN,DDX58,DHX58,DIAPH1,DLG1,E2F2,EP300,FAM20A,GADD45A,GCSAM,HOXA11,IL2RB,IL5,ITGB3,JAK3,KAT6A,LTB,LY6E,MAN2A2,MAP3K14,MAPK8IP2,MERTK,MET,MIB1,MSH5,MYBL1,MYH10,NFKB2,OCLN,PLAGL2,PMS2,PPP1R15B,PRKCE,PTPN11,PTPRF,RASSF2,RASSF5,REL,RELB,RFW…	101
Cell Morphology,Hair and Skin Development and Function	Morphology of epithelial cell lines	1.43e-05			BCR,EPB41,MAP2K3,MAP3K14,MET,NF2,PHLPP2,PLAUR,PRKCE,PTPN11,TGFB2,TJP1,TP53	13
Cancer,Neurological Disease,Organismal Injury and Abnormalities	Glioma cancer	1.5e-05			ABHD12B,ADORA1,AGAP5 (includes others),AJUBA,ANKRD18B,ANKRD31,ANKRD34A,ANO2,ARHGAP5,ARID2,ATR,BRCA1,CCDC40,CD48,CDH8,CIPC,CLEC11A,COBL,COL1A1,COL1A2,COL3A1,CUL3,DCAF4,DST,EIF5B,ELOVL7,ENC1,ENG,EP300,FRK,FRMD4B,GALNT5,GRK5,GSTM5,HAVCR1,HIPK2,IFITM3,IL1A,ITGB3,JAK3,JPH1,KLF3,LIMK1,LY6E,MAPK8IP2,MAST3,MDK,MECOM,MED12,MERTK,MESP2,MET,MSH6,MUC16,MYO1D,NF2,NIPBL,NOM1,ODC1,PABPC1,PAIP2B,PCDHGA4,PIK3CA,P…	100
Cancer,Organismal Injury and Abnormalities	Papillary adenocarcinoma	1.52e-05			BCR,BRCA1,CARD16,CD48,CDC6,CMTM4,DCN,ENG,F3,FRMD4B,GRIN2D,GSTM5,HAVCR1,HSPB6,ITGA5,JAG2,KIF14,KLF3,KRT7,KRT80,LRP8,LTB,LY6E,MAP3K21,MERTK,MET,MMP2,NF2,NRG1,OCLN,PIK3CA,POLQ,PRKCE,RGPD4 (includes others),S100A4,STRN3,SYT12,TIMP3,TIMP4,TP53,TPM2,USP7,VAV3	43
Cancer,Hematological Disease,Immunological Disease,Organismal Injury and Abnormalities	Acute lymphoblastic leukemia	1.53e-05		-0.152	ABL2,ADORA1,ADORA2A,ARID2,BCR,CAMK2N1,CD48,CYP1A1,EP300,F3,GADD45A,GATA2,GATA3,IKZF2,JAK3,KMT2A,LY6E,MAGI1,MGA,MR1,MSH6,MTR,NIPBL,NUP214,NUP98,OPA1,PDE4D,PIK3CA,POLA1,POLE,PPAT,PTPN11,RPTOR,STAG2,STAT5B,TLL1,TMTC2,TOX,TP53,TRIO,TXLNG,USP7	42
Cellular Development,Cellular Growth and Proliferation	Proliferation of myeloid cells	1.65e-05		-1.62	BCR,BRPF1,CEACAM1,CLEC11A,CSF3,DCN,HIPK2,IL1A,IL5,JAK3,KMT2A,MAFB,MECOM,MET,MYH10,NRG1,NUP98,PIM1,PTPN11,RPTOR,SAMD9,SAMD9L,SOCS1,SPIB,STAT5B,STING1,TGFB2,TNFRSF9,TP53	29
Cancer,Hematological Disease,Immunological Disease,Organismal Injury and Abnormalities	Plasma cell dyscrasia	1.72e-05			ADRA1B,ADRB1,ALOX12B,ARID2,ATR,AXIN1,B2M,BCLAF1,BIRC3,CCL5,CD48,CTSL,DIAPH1,E2F2,EP300,EPSTI1,FRMD4B,GRIN2D,HSF4,IFIT3,IL31RA,ITGB3,KAT6A,KLF3,KMT2A,LY6E,MAP3K14,MMP2,MR1,PASK,PIK3CA,PKP2,POLA1,POLE,POU3F1,PSMB8,PSMB9,PTPN11,PTPRF,PTPRZ1,RCC1,RPTOR,SHANK3,STAG2,STRN3,TNIK,TP53,TRIO,XPO1	49
Cancer,Endocrine System Disorders,Organismal Injury and Abnormalities,Reproductive System Disease	Serous ovarian adenocarcinoma	1.8e-05			ATR,B2M,BCR,BRCA1,CARD16,CLDN3,CLDN7,CMTM4,EIF4A2,ELF3,EP300,GATA3,GSTM5,JAG2,KRT7,LRP8,MAP3K21,MECOM,MET,MUC16,OCLN,PIK3CA,POLQ,PTPN11,SIN3A,STAG2,STAT1,TIMP3,TP53,USP7,VAV3	31
Cellular Movement	Cell movement of tumor cell lines	1.87e-05		-0.222	ACTA2,ANKRD28,ANKS1A,ARFGEF1,ARFGEF2,ARHGAP8/PRR5-ARHGAP8,ASAP1,ATF3,BCR,BHLHE41,BRCA1,CCL5,CCN3,CEACAM1,CLDN3,CLDN7,CLIC1,COL1A1,CSF3,CTSL,CXCL5,DCN,DDX58,DEFB103A/DEFB103B,DGKD,DIAPH1,DLX3,DUSP5,EIF2AK2,EIF3A,ENG,ESRP2,F3,FERMT2,FNBP1L,FOSB,GATA3,GCSAM,GEMIN5,GRHL2,GSE1,HBEGF,HIC1,HOMER3,HOOK1,HOXA11,IFITM3,IL18,IL1A,IL5,ITCH,ITGA5,ITGB3,JAG2,LGALS3BP,LIMK1,MAGI1,MAP3K21,MARVELD3,MDK,MERTK,MET,…	111
Inflammatory Disease,Neurological Disease,Skeletal and Muscular Disorders	Relapsing-remitting multiple sclerosis	1.93e-05	Increased	2.985	ADRA1B,ADRB1,EPSTI1,GABRE,GRIN2D,IFIT1,IL2RB,IRF7,ISG15,LY6E,MR1,MX1,OAS1,OAS3,POLA1,POLE,RSAD2	17
Cancer,Hematological Disease,Immunological Disease,Organismal Injury and Abnormalities	Low-grade B-cell lymphoma	1.94e-05			ARHGAP42,BICC1,BIRC3,CEP250,CEP350,CNOT1,COL3A1,COL4A5,CPSF7,DDX58,DGKD,DLG1,DNAH5,DST,EP300,FANCB,GSE1,IL2RB,MED12,MGA,MUC16,MYOF,NUP98,PAPLN,POLA1,POLR3B,PTPN11,RBCK1,RTN2,S100A4,SBNO1,SEC14L1,SEMA3E,SHANK3,SHROOM2,SHROOM3,SMCO2,SPEN,STAT5B,TEX14,TFCP2,TNIK,TP53,TRAF1,TRIM55,TRIP12,TTC21B,USP2,VAV3,VWDE,XPO1,ZNF292	52
Cellular Movement	Invasion of cells	1.97e-05		-0.735	ABL2,ABLIM1,ACTA2,ANGPTL4,ANTXR2,ARHGEF26,ASAP1,ATF3,AZGP1,BCR,BHLHE41,BRCA1,BTBD7,CCN3,CCNB1IP1,CEACAM1,CLDN3,CLDN7,CSF3,CTSL,CXCL5,DCN,DDX58,DEFB103A/DEFB103B,DIAPH1,EIF2AK2,EIF3A,ELF3,ENG,EPAS1,EPSTI1,F3,FERMT2,FNBP1L,FRK,GATA3,GNAL,GPC1,GSE1,HBEGF,HIC1,HIPK2,HNRNPAB,IFITM1,IFITM3,IL18,ITGA5,ITGB3,LARP1,LIMK1,MAGI1,MAP3K21,MDK,MERTK,MET,MITF,MMP13,MMP2,MTUS1,MX1,MYH10,NANOS1,NEDD4,NF2,NPTX2,NR…	111
Cell Signaling	Rho protein signal transduction	2e-05		1.675	ABL2,ADRA1B,ADRB1,AKAP13,ARHGAP42,ARHGAP5,BCR,CCDC125,COL1A2,COL3A1,CUL3,EPS8L2,LIMK1,MET,MYO9B,PRAG1	16
Cell Death and Survival	Apoptosis of connective tissue cells	2e-05		-0.241	ABL2,ATF3,BIRC3,CCN3,CUL3,DAPK1,DCN,DDIT4,DDX58,E2F2,EIF2AK2,ENG,EP300,FCGR1A,HBEGF,IL18,IL1A,ITGB3,MAP2K3,MAP3K14,NEU3,NSMAF,OPA1,PIK3CA,PLP2,PMS2,PTPN11,RASSF5,REL,SENP1,SMURF1,SPARC,TGFB2,TIMP3,TNIP1,TP53,TRAF1,USP22	38
Cell Death and Survival	Apoptosis of fibroblasts	2.06e-05		-0.816	ABL2,ATF3,BIRC3,CCN3,CUL3,DAPK1,DDX58,E2F2,EIF2AK2,ENG,EP300,IL18,IL1A,MAP2K3,NEU3,NSMAF,OPA1,PIK3CA,PLP2,PMS2,PTPN11,RASSF5,REL,SENP1,SPARC,TIMP3,TNIP1,TP53,TRAF1,USP22	30
Cancer,Neurological Disease,Organismal Injury and Abnormalities	Astrocytoma	2.17e-05			ADORA1,AGAP5 (includes others),AJUBA,ANKRD18B,ANKRD31,ANKRD34A,ANO2,ARHGAP5,ARID2,ATR,BRCA1,CD48,CDH8,CHERP,CIPC,CLEC11A,COBL,COL1A1,COL1A2,COL3A1,CSF3,CUL3,DCAF4,DST,EIF5B,ELOVL7,ENC1,ENG,EP300,FRK,FRMD4B,GALNT5,GRK5,GSTM5,HAVCR1,HIPK2,IFITM3,IL1A,ITGB3,JAK3,JPH1,KLF3,LIMK1,LY6E,MAPK8IP2,MAST3,MDK,MECOM,MED12,MERTK,MESP2,MET,MSH6,MUC16,MYO1D,NOM1,ODC1,PABPC1,PAIP2B,PCDHGA4,PGF,PIK3CA,PKD1L2,POLE…	97
Cancer	Cell transformation	2.2e-05	Decreased	-3.25	ADRA1B,AKAP13,ATF3,BCR,BRCA1,CDC25A,COL1A1,COL1A2,DAPK1,DDIT4,DOT1L,EIF2AK2,ELF3,EP300,FOSB,FRS2,IL18,KAT2A,KMT2A,MAP2K3,MAP3K14,MECOM,MERTK,MET,MITF,MMP2,NEDD4,NF2,NFKB2,NRG1,OCLN,ODC1,PAK2,PARP10,PIK3CA,PIM1,PRKCE,PTPN11,REL,SIN3A,SOCS1,STARD13,STYK1,TAF15,TFEB,TGFB2,TIAM1,TP53,TRIO,USP7,VAV3	51
Cellular Growth and Proliferation,Lymphoid Tissue Structure and Development	Proliferation of lymphatic system cells	2.23e-05	Decreased	-2.245	ACP3,ADORA2A,AKAP13,B2M,BCLAF1,BCR,BIRC3,BRCA1,BRPF1,CCL5,CD48,CDC25A,CEACAM1,CLEC11A,CSF3,DGCR8,DIAPH1,DLG1,DUSP5,E2F2,EIF2AK2,ELF4,EP300,FRS2,GADD45A,GATA2,GATA3,GCH1,HAVCR1,HSH2D,IFI16,IKZF2,IL18,IL1A,IL2RB,IL31RA,IL5,ISG15,ISG20,ITCH,ITGA5,ITGB3,JAK3,KAT2A,KLF3,KMT2A,LTB,LTB4R,MAFB,MAP3K14,MDK,MERTK,MYBL1,NFKB2,NUP98,PARP14,PDE4D,PGF,PIK3CA,PIM1,PLAUR,PPAT,PPL,PRKCE,PTPN11,RASSF5,REL,RELB,RPT…	88
Neurological Disease,Organismal Injury and Abnormalities	Calcification of brain	2.26e-05			ISG15,OCLN,SLC20A2,STAT1,USP18	5
Cancer,Hematological Disease,Immunological Disease,Organismal Injury and Abnormalities	Diffuse lymphoma	2.28e-05			ABL2,ADAMTSL3,ADORA1,ADORA2A,ARHGAP42,ATF3,B2M,BICC1,BIRC3,CAD,CEP250,CEP350,CNOT1,COL3A1,COL4A5,CPSF7,DDX10,DDX58,DGKD,DLG1,DNAH5,DST,EP300,FANCB,GSE1,IL2RB,JAK3,KIAA0100,KMT2A,LRRC37A3 (includes others),MED12,MGA,MUC16,MYOF,NCOA6,NUP98,PAPLN,PIK3CA,PIM1,PLEKHA7,POLA1,POLE,POLR3B,PPAT,PTPN11,RBCK1,RCC1,REL,RTN2,S100A4,SBNO1,SEC14L1,SEMA3E,SHANK3,SHROOM2,SHROOM3,SMCO2,SOCS1,SPEN,STAT5B,TAF4B,TEX1…	79
Organismal Injury and Abnormalities	Wound	2.5e-05		0.152	ACTA2,ADORA2A,ADRB1,AJUBA,BRCA1,CFTR,COL1A1,COL3A1,CSF3,ENG,EPB41L4B,GADD45A,HBEGF,IL18,IL1A,ITGA5,ITGB3,MASP2,MDK,MET,MT2A,NRG1,OGT,PER2,PGF,RASSF5,SPARC,SYNPO,TGFB2,TIAM1,TP53	31
Cellular Development,Cellular Growth and Proliferation,Hematological System Development and Function,Lymphoid Tissue Structure and Development	Proliferation of immune cells	2.51e-05		-1.945	ACP3,ADORA2A,AKAP13,B2M,BCLAF1,BCR,BIRC3,BRCA1,CCL5,CD48,CDC25A,CEACAM1,CLEC11A,CSF3,DCN,DGCR8,DIAPH1,DLG1,DUSP5,E2F2,EIF2AK2,ELF4,EP300,GADD45A,GATA2,GATA3,GCH1,HAVCR1,HSH2D,IFI16,IKZF2,IL18,IL1A,IL2RB,IL31RA,IL5,ISG15,ISG20,ITCH,ITGA5,ITGB3,JAK3,KAT2A,KLF3,LTB,MAFB,MAP3K14,MDK,MERTK,MET,MYBL1,NFKB2,NRG1,NUP98,PARP14,PDE4D,PGF,PIK3CA,PIM1,PLAUR,PPAT,PPL,PRKCE,PTPN11,RASSF5,REL,RELB,RPS6KA3,RPTOR…	86
Cancer,Hematological Disease,Immunological Disease,Organismal Injury and Abnormalities	T-cell leukemia	2.6e-05			ABL2,ADORA1,ADORA2A,ARID2,ATR,B2M,BCR,DLG1,EP300,FRMD4B,GATA2,GATA3,IKZF2,JAK3,KLF3,KMT2A,MED12,MGA,MSL2,NUP98,PAK2,PIM1,POLA1,POLE,POU3F1,PPAT,PTPN11,REL,RPTOR,SOCS1,STAG2,STAT5B,TP53,TRIO,TXLNG,USP7	36
Connective Tissue Disorders,Developmental Disorder,Organismal Injury and Abnormalities,Skeletal and Muscular Disorders	Microcephaly	2.79e-05			ARFGEF2,ATR,CDC6,CEP152,CIT,CYP26A1,DIAPH1,EIF2S3,KAT6A,KIF14,NCAPD2,OCLN,ORC1,PCNT,PPP1R15B,RPTOR,TP53,USP18,ZNF335	19
Inflammatory Disease,Neurological Disease,Skeletal and Muscular Disorders	Relapsed multiple sclerosis	2.8e-05	Increased	2.985	ADRA1B,ADRB1,EPSTI1,FCGR1A,GABRE,GRIN2D,IFIT1,IL2RB,IRF7,ISG15,LY6E,MR1,MX1,OAS1,OAS3,POLA1,POLE,RSAD2	18
Cancer,Organismal Injury and Abnormalities	Intraepithelial neoplasm	2.87e-05		-0.97	ACP3,ATF3,CEP95,CIPC,EXOC3,GATA3,GPC1,HAVCR1,KLF3,KRT7,LY6E,MUC16,MYO1F,NUP98,OAS3,PDCD11,PELP1,PIK3CA,PIM1,PLEKHB1,POLR3B,PTGDS,RAB11FIP2,RBM26,RDH8,SHOC1,SIM2,SOCS1,TP53,UTP20,VAV3,YTHDF1,ZBTB2,ZFAT,ZNF594	35
Connective Tissue Development and Function,Tissue Development	Growth of connective tissue	2.92e-05	Decreased	-2.454	ACACA,ADORA2A,ATF3,ATR,BCR,BRCA1,BRPF1,CASC3,CCN3,CD48,CDC6,CEACAM1,COL1A1,CSF3,DCN,DHX9,EIF2AK2,ELN,ENG,EP300,EP400,ERCC6L,FOSB,FOSL2,FRS2,GADD45A,GATA3,GREM1,HBEGF,HIPK2,HOXA11,IFI16,IL18,IL1A,IL2RB,ITGA5,ITGB3,JAK3,KMT2A,MAP2K3,MDK,MECOM,MET,MMP2,MYH10,NEU3,NF2,NFKB2,OGT,PARP10,PGF,PIK3CA,PLAUR,PLK2,PMS2,PPAT,PTGFR,PTPRF,PTPRZ1,REL,RELB,RPS6KA3,SIN3A,SOCS1,SPARC,SRSF6,STAT1,STEAP4,TGFB2,TNFRSF…	74
Cancer,Hematological Disease,Immunological Disease,Organismal Injury and Abnormalities	Small B-cell lymphocytic lymphoma	2.99e-05			ARHGAP42,BICC1,BIRC3,CEP250,CEP350,CNOT1,COL3A1,COL4A5,CPSF7,DDX58,DGKD,DLG1,DNAH5,DST,EP300,FANCB,GSE1,MED12,MGA,MUC16,MYOF,NUP98,PAPLN,POLA1,POLR3B,PTPN11,RBCK1,RTN2,S100A4,SBNO1,SEC14L1,SEMA3E,SHANK3,SHROOM2,SHROOM3,SMCO2,SPEN,STAT5B,TEX14,TFCP2,TNIK,TP53,TRAF1,TRIM55,TRIP12,TTC21B,USP2,VAV3,VWDE,XPO1,ZNF292	51
Cancer,Hematological Disease,Immunological Disease,Organismal Injury and Abnormalities	Indolent non-Hodgkin lymphoma	2.99e-05			ARHGAP42,BICC1,BIRC3,CEP250,CEP350,CNOT1,COL3A1,COL4A5,CPSF7,DDX58,DGKD,DLG1,DNAH5,DST,EP300,FANCB,GSE1,IL2RB,MED12,MGA,MUC16,MYOF,NUP98,PAPLN,POLA1,POLR3B,PTPN11,RBCK1,RTN2,S100A4,SBNO1,SEC14L1,SEMA3E,SHANK3,SHROOM2,SHROOM3,SMCO2,SPEN,STAT5B,TEX14,TFCP2,TNIK,TP53,TRAF1,TRIM55,TRIP12,TTC21B,USP2,VAV3,VWDE,XPO1,ZNF292	52
Embryonic Development,Organismal Development	Development of body trunk	3.04e-05		-1.644	ADAMTS16,ADRA1B,AKAP13,ALDH1A3,AMH,ANKRD17,AP4E1,ARHGAP5,ARID2,ATF3,ATXN1L,AXIN1,B2M,BCLAF1,BICC1,BRCA1,BTBD7,BVES,CCDC40,CCL5,CCN3,CDC25A,CELSR3,CFTR,COBL,COL3A1,COL4A5,CPLANE1,CRELD1,CSF3,CYP26A1,DLG1,DNAAF1,DNAH11,DNAH5,DOK7,ELN,ENG,EP300,EPAS1,FAM20A,FMNL2,FOSB,FOXP4,FRS2,GATA3,GJC1,GREM1,GRHL2,GRK5,HBEGF,HOXA11,HOXC6,IFI16,IL1A,IL2RB,ILDR2,IRX4,JAK3,KAT6A,KMT2A,LTB,LY6E,MAFB,MAN2A2,MAP3K14,M…	126
Cell Death and Survival	Cell death of fibroblasts	3.16e-05		-0.417	ABL2,ATF3,BIRC3,BRCA1,CCN3,CUL3,DAPK1,DDX58,E2F2,EIF2AK2,ENG,EP300,HIPK2,IL18,IL1A,LTB,MAP2K3,NEU3,NSMAF,OPA1,PIK3CA,PLP2,PMS2,PTPN11,RASSF5,REL,SENP1,SPARC,TIMP3,TNIP1,TP53,TRAF1,UNG,USP22	34
Cell Cycle,Gene Expression	Binding of DNA endogenous promoter	3.45e-05		-0.036	BRCA1,CSF3,CXCL5,EP300,F3,GRHL2,IL18,JAK3,MAP3K14,NRG1,PGF,REL,STAT1,TFAP2A,TFAP2C,TFCP2,TP53,UCN	18
Cancer,Organismal Injury and Abnormalities	Blastoma	3.55e-05			ADORA1,AJUBA,ANKRD34A,ATR,BRCA1,CD48,CIPC,CLEC11A,COL1A1,COL1A2,COL3A1,ENC1,ENG,EP300,FRK,FRMD4B,HIPK2,IL1A,ITGB3,KLF3,LIMK1,LY6E,MAST3,MDK,MECOM,MED12,MERTK,MSH6,MYBBP1A,NOM1,PAIP2B,PDZD8,PIK3CA,POLE,POLQ,POU3F1,PREPL,PTGDS,PTPN11,S100A4,SHTN1,SIN3A,SLC12A2,SLC22A4,STAG2,TGFB2,TP53,TRIO,TRPC6,TSPYL5,VAV3	51
Organismal Injury and Abnormalities,Respiratory Disease	Bronchopathy	3.96e-05			ADORA1,ADORA2A,ADRA1B,ADRB1,AGTPBP1,ARFGEF1,CFTR,CPLANE1,EIF4A2,ENPP4,IL5,ORC1,PDE4D,POLR2A,SLC12A2,SPATA13,SPOPL,STK31,SUPT6H,TIMP3,TP53,TRAF4,USP40,VPS13B,XPO5,ZNF292	26
Cancer,Hematological Disease,Immunological Disease,Organismal Injury and Abnormalities	Hairy cell leukemia	4.56e-05			ADAMTS16,AGL,ATR,ATRNL1,CLDN14,COL1A1,COL1A2,DAGLA,DDX58,DNAH5,ENC1,EPAS1,GABRE,MAGI1,MTUS1,NALCN,NCOA6,PKD1L2,POLA1,POLE,POLQ,PPTC7,PRDM15,PTPRZ1,SOX30,SPEN,STEAP4,TP53,UBE3C,UVSSA,ZNF10,ZNF551	32
Cellular Movement	Migration of cells	4.57e-05		-1.258	ABL2,ACACA,ACTA2,ADORA1,ADORA2A,AGTRAP,AIM2,AJUBA,ANGPTL4,ANKRD28,ANKS1A,ARFGEF1,ARFGEF2,ARHGAP5,ARHGAP8/PRR5-ARHGAP8,ARHGEF5,ARHGEF7,ARID2,ASAP1,ATF3,BCR,BHLHE41,BRCA1,BST2,CCL28,CCL5,CCN3,CCNT1,CD48,CEACAM1,CELSR3,CFTR,CLASP1,CLDN7,CLEC11A,COL1A1,COL1A2,COL3A1,CSF3,CTSL,CXCL5,CYP1A1,CYP26A1,DCN,DDIT4,DDX58,DEFB103A/DEFB103B,DGCR8,DGKD,DIAPH1,DLX3,DOCK3,DUSP5,EIF2AK2,ELF4,ELN,ENG,EPAS1,EPB41L4B,…	202
Cancer,Organismal Injury and Abnormalities	Clear cell neoplasm	4.78e-05			AJUBA,ARHGAP5,ARHGEF7,ARID2,ASAP1,ATP13A3,ATR,ATXN2L,BRCA1,BRPF3,CAD,CDC6,CEP95,CIT,CLDN3,CLDN7,DAPK1,DCN,DDX58,DHX35,DST,EIF4A2,EP300,FNBP1L,GPM6A,GRIN2D,HAVCR1,HSPB6,IFI16,IL2RB,IL5,INTS1,ITGA5,ITGB3,KCNJ15,KIAA1549,KIF14,KLF3,LMTK2,MAGI1,MAST4,MECOM,MERTK,MET,MMP2,MR1,MSH6,MUC16,NF2,NOM1,NUP214,OGT,PASK,PCDH7,PHF3,PIK3CA,PLSCR1,POLQ,POLR1A,POU3F1,PRKCE,PTGFR,PTPN11,PTPRZ1,R3HDM2,RBM28,RGPD4 (i…	94
Cancer,Hematological Disease,Immunological Disease,Organismal Injury and Abnormalities	Diffuse small-cell lymphoma	4.83e-05			ARHGAP42,BICC1,BIRC3,CEP250,CEP350,CNOT1,COL3A1,COL4A5,CPSF7,DDX58,DGKD,DLG1,DNAH5,DST,EP300,FANCB,GSE1,IL2RB,JAK3,KIAA0100,MED12,MGA,MUC16,MYOF,NCOA6,NUP98,PAPLN,PIK3CA,PIM1,POLA1,POLE,POLR3B,PTPN11,RBCK1,RCC1,RTN2,S100A4,SBNO1,SEC14L1,SEMA3E,SHANK3,SHROOM2,SHROOM3,SMCO2,SPEN,STAT5B,TEX14,TFCP2,TFR2,TNIK,TP53,TRAF1,TRIM55,TRIP12,TTC21B,UNC13D,USP2,USP22,VAV3,VWDE,XPO1,ZNF292	62
Infectious Diseases	Replication of Herpesviridae	4.84e-05	Decreased	-2.39	DDX58,IFIH1,IRF9,ISG20,MX2,OAS1,OASL,PARP12,PPM1M,RSAD2,SP100,STAT1,UBE3C	13
Cancer,Organismal Injury and Abnormalities	Growth of tumor	4.87e-05	Decreased	-3.522	ADORA2A,AJUBA,AKR1B10,ANGPTL4,ATF3,BRCA1,BST2,CCL5,CCN3,CDC6,CEACAM1,CSF3,CXCL5,DAPK1,DCN,DDX11,DGCR8,EIF4B,ELF4,ENG,EP300,EPAS1,EPSTI1,F3,FBXW11,GADD45A,GATA3,GCH1,GPC1,GREM1,GRHL2,GSE1,HBEGF,HIC1,IFITM3,IKZF2,IL18,IL1A,IL5,ITCH,ITGA5,ITGB3,KAT2A,KMT2A,LARP1,LIMD1,LY6E,MAP2K3,MAP3K14,MAP3K21,MET,MMP2,MYH10,NEDD4,NF2,NFKB2,NRG1,ODC1,OGT,PAK2,PDE4D,PGF,PHC3,PHLPP2,PIK3CA,PIM1,PLAUR,PRKCE,PTPN11,RE…	98
Cellular Development,Cellular Growth and Proliferation,Hematological System Development and Function,Hematopoiesis,Lymphoid Tissue Structure and Development,Tissue Development	Development of phagocytes	4.95e-05		-0.468	ADORA1,AKAP13,CSF3,DGCR8,FCGR1A,GATA2,GREM1,IFI16,IL1A,IL2RB,IL31RA,IL5,IRF7,ITGB3,JAK3,KMT2A,LTB,MAFB,MDK,MITF,MR1,NFKB2,REL,RELB,RPTOR,SENP1,SOCS1,SPIB,STAT1,STAT5B,USP18,VAV3,ZNF10	33
Cancer,Organismal Injury and Abnormalities,Respiratory Disease	Upper airway cancer	5.06e-05			ADAMTSL3,ADORA1,ALOX12B,AP1G1,ARID2,ARMC5,ATG2A,AZIN1,BAAT,BICC1,CCDC30,CDV3,CELSR3,CEP250,CEP350,CFTR,CHERP,CLASP1,COL1A2,CPAMD8,DAPK1,DNAH5,DOCK3,DZIP3,EML4,EPB41L2,FOSL2,FRS2,GALNT5,GPM6A,HEATR1,HIPK2,IKZF2,JCAD,KMT2A,LRP8,LRPPRC,LYPD1,MAST3,MAST4,MET,METTL16,MMP2,MTR,MUC16,MYH10,MYO9B,NEDD4,NHS,OPA1,OTUD4,PCNT,PHF8,PIK3CA,PIP4K2A,PREPL,PTPRH,RIPK4,RPTOR,RRP1B,SEC14L4,SLC12A2,SLC9A2,SMG1,SP110…	85
Cellular Development,Cellular Growth and Proliferation,Hematological System Development and Function,Hematopoiesis,Lymphoid Tissue Structure and Development,Tissue Development	Differentiation of phagocytes	5.06e-05		-0.239	ADORA1,BCR,CLEC11A,CSF3,DUSP5,FCGR1A,GATA2,GATA3,GREM1,IFI16,IL1A,IL2RB,IL31RA,IL5,IRF7,ITGB3,JAK3,KMT2A,LTB,MAP3K14,MDK,MR1,NFKB2,PLSCR1,PTPN11,REL,RELB,RPTOR,SENP1,SOCS1,SPIB,STAT1,STAT5B,TP53,USP18,ZNF10	36
Cancer,Hematological Disease,Immunological Disease,Organismal Injury and Abnormalities	Plasma cell neoplasm	5.31e-05			ADRA1B,ADRB1,ALOX12B,ARID2,ATR,AXIN1,B2M,BCLAF1,BIRC3,BRCA1,CCL5,CD48,COL3A1,CTSL,DIAPH1,E2F2,EP300,EPSTI1,FRMD4B,GRIN2D,HSF4,IFIT3,IL31RA,ITGB3,KAT6A,KLF3,KMT2A,LY6E,MAP3K14,MMP2,MR1,PASK,PIK3CA,PKP2,POLA1,POLE,POU3F1,PRPF19,PSMB8,PSMB9,PTPN11,PTPRF,PTPRZ1,RCC1,RPTOR,SHANK3,STAG2,STRN3,TGFB2,TNIK,TP53,TRIO,XPO1	53
Cancer,Organismal Injury and Abnormalities	Embryonal tumor	5.35e-05		0.953	ADORA1,AJUBA,ANKRD34A,ATR,AXIN1,BRCA1,CD48,CIPC,CLEC11A,COL1A1,COL1A2,COL3A1,DOCK3,ENC1,ENG,EP300,FCGR1A,FRK,FRMD4B,GEMIN5,HELZ,HIPK2,IL1A,IL2RB,ITGB3,KDM4C,KLF3,KMT2A,LETM1,LGALS3BP,LIMK1,LURAP1L,LY6E,MAST3,MDK,MECOM,MED12,MERTK,MET,MGA,MSH6,MUC16,MYBBP1A,NIPBL,NOM1,PAIP2B,PDZD8,PGF,PIK3CA,PMS2,POLE,POLQ,POU3F1,PREPL,PTGDS,PTPN11,S100A4,SHTN1,SIN3A,SLC12A2,SLC22A4,STAG2,TGFB2,TP53,TRIO,TRPC6,TSP…	69
Developmental Disorder	Autism spectrum disorder or intellectual disability	5.43e-05			ADRA1B,ADRB1,ALDH1A3,AP4E1,ARHGEF7,ARID2,BPTF,BRF1,BRPF1,CLIC1,COL1A1,DGCR8,DIP2B,EIF2S3,EP300,FCGR1A,FMNL2,GABRE,GCH1,GPC1,GRIN2D,HIVEP2,IFITM1,IFITM3,ITGB3,KANSL1,KAT6A,KAT6B,KCNQ5,KLHL15,KMT2A,MAP3K9,MBD5,MED12,MET,MTR,MYBBP1A,MYO6,NALCN,NEFL,NUS1,OGT,OPA1,PEX6,PHF8,PLAAT4,POGZ,POMK,RLIM,RPGRIP1L,RPS6KA3,SCAPER,SET,SHANK3,SIN3A,SLC12A2,SLC12A5,TAP1,TFAP2A,TNIK,TRIO,TRIP12,VAMP5	63
Cell Death and Survival	Cell death of connective tissue cells	5.52e-05		-0.568	ABL2,ATF3,ATR,AXIN1,BIRC3,BRCA1,CCN3,CDK11A,CUL3,DAPK1,DCN,DDIT4,DDX58,E2F2,EIF2AK2,EIF5B,ENG,EP300,EP400,FCGR1A,GADD45A,GALNT5,GSTM5,HBEGF,HIPK2,IFI16,IL18,IL1A,IRF7,ITGB3,LTB,MAP2K3,MAP3K14,MECOM,MET,NEU3,NFKB2,NSMAF,OPA1,PAK2,PGF,PIK3CA,PIM1,PLAC8,PLAGL2,PLP2,PMS2,PTPN11,PTPRH,RASSF5,REL,RGPD4 (includes others),SENP1,SERPINB3,SMURF1,SPARC,STAT1,TGFB2,TIAM1,TIMP3,TNIP1,TP53,TRAF1,UNG,USP18,USP22	66
Cell Signaling	Small GTPase mediated signal transduction	5.65e-05		1.858	ABL2,ADRA1B,ADRB1,AKAP13,ARHGAP42,ARHGAP44,ARHGAP5,ARHGEF7,BCR,CCDC125,COL1A2,COL3A1,CUL3,DYNLT1,EPS8L2,FARP2,LIMK1,MET,MYO9B,OGT,PLK2,PRAG1,SHTN1,STMN3,TGFB2,TIAM1,TP53,VAV3	28
Cancer,Organismal Injury and Abnormalities	Clear-cell adenocarcinoma	5.76e-05			AJUBA,ARHGAP5,ARHGEF7,ARID2,ASAP1,ATP13A3,ATR,ATXN2L,BRCA1,BRPF3,CAD,CDC6,CEP95,CIT,CLDN3,CLDN7,DAPK1,DCN,DDX58,DHX35,DST,EIF4A2,EP300,FNBP1L,GPM6A,GRIN2D,HAVCR1,HSPB6,IFI16,IL2RB,IL5,INTS1,ITGA5,ITGB3,KCNJ15,KIAA1549,KIF14,KLF3,LMTK2,MAGI1,MAST4,MECOM,MERTK,MET,MMP2,MR1,MSH6,MUC16,NF2,NOM1,NUP214,OGT,PASK,PCDH7,PHF3,PIK3CA,PLSCR1,POLQ,POLR1A,PRKCE,PTGFR,PTPN11,PTPRZ1,R3HDM2,RBM28,RGPD4 (includes…	93
Cellular Development,Cellular Growth and Proliferation,Hematological System Development and Function,Lymphoid Tissue Structure and Development	Proliferation of mononuclear leukocytes	6.05e-05		-1.634	ACP3,ADORA2A,AKAP13,B2M,BCLAF1,BCR,BIRC3,BRCA1,CCL5,CD48,CDC25A,CEACAM1,CLEC11A,CSF3,DGCR8,DIAPH1,DLG1,DUSP5,E2F2,EIF2AK2,ELF4,EP300,GADD45A,GATA2,GATA3,GCH1,HAVCR1,HSH2D,IFI16,IKZF2,IL18,IL1A,IL2RB,IL31RA,IL5,ISG15,ISG20,ITCH,ITGA5,ITGB3,JAK3,KAT2A,KLF3,LTB,MAP3K14,MDK,MERTK,MYBL1,NFKB2,NUP98,PARP14,PDE4D,PGF,PIK3CA,PIM1,PLAUR,PPAT,PPL,PRKCE,PTPN11,RASSF5,REL,RELB,RPTOR,SELENOK,SOCS1,SPIB,STAT1,…	81
Cancer,Neurological Disease,Organismal Injury and Abnormalities	High grade astrocytoma	6.18e-05			ADORA1,AGAP5 (includes others),AJUBA,ANKRD18B,ANKRD31,ANKRD34A,ANO2,ARHGAP5,ARID2,ATR,BRCA1,CD48,CDH8,CIPC,CLEC11A,COBL,COL1A1,COL1A2,COL3A1,CUL3,DCAF4,DST,EIF5B,ELOVL7,ENC1,ENG,EP300,FRK,FRMD4B,GALNT5,GRK5,GSTM5,HAVCR1,HIPK2,IFITM3,IL1A,ITGB3,JAK3,JPH1,KLF3,LIMK1,LY6E,MAPK8IP2,MAST3,MDK,MECOM,MED12,MERTK,MESP2,MSH6,MUC16,MYO1D,NOM1,ODC1,PABPC1,PAIP2B,PCDHGA4,PIK3CA,PKD1L2,POLE,POLQ,POU3F1,PREPL,…	91
Cancer,Organismal Injury and Abnormalities	Metastasis of tumor cell lines	6.27e-05		-1.635	ABLIM1,ANGPTL4,ANTXR2,ASAP1,ATF3,B2M,BACH1,BRCA1,CDC25A,CSF3,CXCL5,CYP26A1,DAPK1,F3,FNBP1L,GSE1,HCAR1,HNRNPAB,IL18,IRF7,MAGI1,MAP2K3,MET,MTUS1,NF2,PGF,PLAUR,PTPN11,PTPRZ1,RPS6KA3,RPTOR,S100A4,TBC1D16,TP53,TRAF4,VAV3	36
Antigen Presentation,Protein Synthesis	Quantity of MHC Class I on cell surface	6.34e-05		1.981	B2M,PSMB8,STAT1,TAP1	4
Hematological System Development and Function,Lymphoid Tissue Structure and Development,Organ Morphology,Organismal Development,Tissue Morphology	Morphology of spleen component	6.4e-05			DIAPH1,E2F2,IL2RB,JAK3,LTB,MAP3K14,MYBL1,NFKB2,RASSF2,RASSF5,SOCS1,SPIB,TEC,TP53	14
Cancer,Organismal Injury and Abnormalities	HER2 positive carcinoma	6.49e-05			ABL2,DAPK1,DST,ELOVL7,EVPL,FRK,KLHL12,MYO6,NIPBL,OPA1,PIK3CA,PIP4K2A,PLCD4,PLEKHG4,POLA1,POLE,PTPRZ1,PUM2,RPGRIP1L,RPS6KA3,TEX14,TP53,TRIP12,USP7,ZFAT,ZNF598	26
Cellular Development,Cellular Growth and Proliferation,Hematological System Development and Function,Lymphoid Tissue Structure and Development	Proliferation of lymphocytes	6.51e-05		-1.927	ACP3,ADORA2A,AKAP13,B2M,BCLAF1,BCR,BIRC3,BRCA1,CCL5,CD48,CDC25A,CEACAM1,CLEC11A,DGCR8,DIAPH1,DLG1,DUSP5,E2F2,EIF2AK2,ELF4,EP300,GADD45A,GATA2,GATA3,GCH1,HAVCR1,HSH2D,IFI16,IKZF2,IL18,IL1A,IL2RB,IL31RA,IL5,ISG15,ISG20,ITCH,ITGA5,ITGB3,JAK3,KAT2A,KLF3,LTB,MAP3K14,MDK,MERTK,MYBL1,NFKB2,NUP98,PARP14,PDE4D,PGF,PIK3CA,PIM1,PLAUR,PPAT,PPL,PRKCE,PTPN11,RASSF5,REL,RELB,RPTOR,SELENOK,SOCS1,SPIB,STAT1,STAT5…	80
Cancer,Organismal Injury and Abnormalities,Reproductive System Disease	Breast adenocarcinoma	6.69e-05		0.194	ACTA2,AJUBA,ANXA9,ARFGEF1,ATR,BRCA1,CCDC30,CD48,CNNM1,CPAMD8,DST,EIF4A2,ELF3,EP300,FERMT2,FNBP1L,GATA3,GREM1,H3C1,JAK3,KMT2A,LY6E,MDC1,MECOM,MED12,MET,MMP2,MT1G,MT2A,NF2,PAK2,PIK3CA,PLK2,POLE,POLQ,PTPN11,PTPRF,RAB11FIP1,S100A4,SIN3A,SMG1,SPEN,STAG2,STAT1,TLL1,TMC5,TP53,TRIO,VXN,ZNF165	50
Neurological Disease	Progressive motor neuron disease	6.9e-05	Increased	3.293	ADORA1,ADORA2A,ADRA1B,ADRB1,AMPD3,ATF3,BCR,BST2,CCL5,COL1A1,COL1A2,COL3A1,DNAJC6,EIF4A2,ELN,ELOVL7,EPSTI1,ERVW-1,FCGR1A,GABRE,GADD45A,GCH1,GIGYF2,GRIN2D,HAVCR1,HLA-F,IFIT1,IL18,IL1A,IL2RB,IRF7,IRGM,ISG15,ITGB3,LY6E,MATR3,MERTK,MR1,MTR,MX1,NEDD4,NEFL,NFKB2,NRG1,OAS1,OAS3,OCLN,PDE4D,PGF,PLK2,POLA1,POLE,PPARGC1B,PSMB8,RSAD2,S100A4,SETX,SHROOM3,SPARC,TP53,TRIM31,USP36	62
Cancer,Gastrointestinal Disease,Hepatic System Disease,Organismal Injury and Abnormalities	Hepatocellular carcinoma	7.45e-05		-1.085	ADRB1,AKR1B10,ARHGAP44,ARID2,ARRDC4,AXIN1,BCO2,BRCA1,CAMK2N1,CASD1,CDC6,CEACAM1,CEP152,CIPC,CLIC1,CLIP4,CNOT1,CPLANE1,DCN,DGCR8,DST,EIF2AK2,ENG,ENPP4,EP400,F3,FRG2/FRG2B,FRK,FRMD4B,GABRE,GCH1,GNL3L,GPM6A,HNRNPAB,IFITM3,IL18,IL1A,IL2RB,IPO8,ITGA5,JAG2,KIAA1549,KIF14,KLF3,KRT7,LTB,LY6E,MCM2,MDK,MERTK,MET,MFAP4,MGRN1,MMP2,MSH6,MT1G,MT2A,MUC16,MYO6,NEDD4,PIK3CA,PLAUR,POLA1,POLQ,PSMB9,RASAL2,RASSF5,RE…	90
Tissue Development	Development of epithelial tissue	7.62e-05		0.04	ANGPTL4,ANTXR2,ARHGEF26,BCLAF1,CEACAM1,CGN,CLDN3,COL1A1,COL1A2,COL4A5,DLG1,DLX3,ELN,ENG,EPB41L5,EXPH5,F3,FOSL2,FRS2,GPC1,GRHL2,HBEGF,HIPK2,HSF4,IL18,IL1A,ITGB3,JAG2,MAP2K3,MAP3K14,MDK,MERTK,MET,MIB1,MITF,MMP2,MYOF,NRARP,NRG1,NUS1,ODC1,PGF,PIK3CA,PIM1,PLAUR,POLD4,PRKCE,PSMB8,PTPN11,RELB,RIPK4,RPTOR,SIPA1L3,SPARC,SPIB,STAT1,TFAP2A,TFAP2C,TGFB2,TIMP3,TP53	61
Cancer,Neurological Disease,Organismal Injury and Abnormalities	Glioblastoma	7.62e-05			ADORA1,AJUBA,ANKRD34A,ATR,BRCA1,CD48,CIPC,CLEC11A,COL1A1,COL1A2,COL3A1,ENC1,ENG,EP300,FRK,FRMD4B,HIPK2,IL1A,ITGB3,KLF3,LIMK1,LY6E,MAST3,MDK,MECOM,MED12,MERTK,MSH6,NOM1,PAIP2B,PIK3CA,POLE,POLQ,POU3F1,PREPL,PTGDS,PTPN11,S100A4,SHTN1,SIN3A,SLC12A2,SLC22A4,STAG2,TGFB2,TP53,TRIO,TRPC6,TSPYL5,VAV3	49
Cellular Movement	Invasion of tumor cell lines	7.65e-05		-1.212	ABL2,ABLIM1,ACTA2,ANGPTL4,ANTXR2,ARHGEF26,ASAP1,ATF3,AZGP1,BHLHE41,BRCA1,CCN3,CEACAM1,CLDN3,CLDN7,CSF3,CXCL5,DCN,DDX58,DIAPH1,EIF2AK2,EIF3A,ELF3,ENG,EPAS1,EPSTI1,FNBP1L,GATA3,GNAL,GSE1,HBEGF,HIC1,HIPK2,HNRNPAB,IFITM1,IFITM3,ITGA5,ITGB3,LARP1,LIMK1,MAGI1,MAP3K21,MDK,MERTK,MET,MITF,MMP13,MMP2,MTUS1,MX1,NANOS1,NEDD4,NF2,NRG1,OCLN,PAK2,PHLPP2,PIK3CA,PLAUR,PPIF,PRKCE,PTPRZ1,RAB11FIP1,REL,RPS6KA3,RPTOR…	90
Cardiovascular Disease,Cardiovascular System Development and Function,Organismal Injury and Abnormalities,Tissue Morphology	Abnormal morphology of aorta wall	7.68e-05			COL3A1,ELN,MMP2,TGFB2,TIMP3	5
Digestive System Development and Function,Gastrointestinal Disease	Abnormal morphology of digestive system	7.71e-05			AGL,ANGPTL4,ATF3,B2M,BCR,BRCA1,CEACAM1,CFTR,COL3A1,CYP1A1,DCN,DDX58,DLG1,FAM20A,GCSAM,HIPK2,IL5,JAK3,KAT6A,LTB,MAN2A2,MAP3K14,MAPK8IP2,MERTK,MET,MYH10,NFKB2,OCLN,PLAGL2,PMS2,POLR3B,PPP1R15B,PTPN11,REL,RELB,RPS6KA3,SCG5,SENP1,SGMS1,SIK3,SIM2,SLC12A2,SLC22A4,SLC51A,SLC9A2,SOCS1,SOX7,SPEN,SPIB,SPTBN1,STAT1,STAT5B,TFAP2A,TGFB2,TIMP3,TNFRSF9,TNIP1,TOX,TP53,TRIM55,WNT10A,YOD1,ZIC5	63
Infectious Diseases	Replication of Murine herpesvirus 4	7.71e-05	Decreased	-2.449	DDX58,IFIH1,ISG20,MX2,OAS1,PARP12	6
Cancer,Neurological Disease,Organismal Injury and Abnormalities	Anaplastic glioma	8.2e-05			ADORA1,AJUBA,ANKRD34A,ATR,BRCA1,CD48,CIPC,CLEC11A,COL1A1,COL1A2,COL3A1,ENC1,ENG,EP300,FRK,FRMD4B,HIPK2,IL1A,ITGB3,KLF3,LIMK1,LY6E,MAST3,MDK,MECOM,MED12,MERTK,MSH6,NOM1,ODC1,PAIP2B,PIK3CA,POLE,POLQ,POU3F1,PREPL,PTGDS,PTPN11,S100A4,SHTN1,SIN3A,SLC12A2,SLC22A4,STAG2,TGFB2,TP53,TRIO,TRPC6,TSPYL5,VAV3	50
Cancer,Hematological Disease,Immunological Disease,Organismal Injury and Abnormalities	Plasma cell myeloma	8.23e-05			ADRA1B,ADRB1,ALOX12B,ARID2,ATR,AXIN1,B2M,BIRC3,CCL5,CD48,EPSTI1,FRMD4B,GRIN2D,IFIT3,ITGB3,KLF3,KMT2A,LY6E,MAP3K14,MMP2,MR1,PASK,PIK3CA,POLA1,PSMB8,PSMB9,PTPN11,SHANK3,STAG2,STRN3,TP53,TRIO,XPO1	33
Cancer,Organismal Injury and Abnormalities,Renal and Urological Disease	Renal clear cell adenocarcinoma	8.26e-05			AJUBA,ARHGAP5,ARHGEF7,ARID2,ASAP1,ATP13A3,ATR,ATXN2L,BRCA1,BRPF3,CAD,CDC6,CEP95,CIT,DAPK1,DCN,DDX58,DHX35,DST,EIF4A2,EP300,FNBP1L,GPM6A,GRIN2D,HAVCR1,HSPB6,IFI16,IL2RB,IL5,INTS1,ITGA5,ITGB3,KCNJ15,KIAA1549,KIF14,KLF3,LMTK2,MAGI1,MAST4,MECOM,MERTK,MET,MMP2,MR1,MSH6,MUC16,NF2,NOM1,NUP214,OGT,PASK,PCDH7,PHF3,PIK3CA,PLSCR1,POLQ,POLR1A,PRKCE,PTGFR,PTPN11,PTPRZ1,R3HDM2,RBM28,RGPD4 (includes others),RIM…	89
Cancer,Organismal Injury and Abnormalities	Advanced malignant solid tumor	8.49e-05		0.503	ABL2,ACTA2,ANGPTL4,ATF3,ATR,B2M,BCR,BRCA1,CARD16,CCL5,CD48,CLDN3,CMTM4,CSF3,DLX3,DOT1L,ENG,EPAS1,EPB41L4B,EPSTI1,FCGR1A,FRK,GATA2,GATA3,GCH1,GSTM5,HOXC6,IKZF2,IL18,IL1A,IL22RA1,IL2RB,IRF7,ITGB3,JAG2,JAK3,LIMK1,LRP8,LTB,MAFB,MAGI1,MAP3K21,MDC1,MECOM,MED12,MERTK,MET,MITF,MMP2,MSH6,MTUS1,MUC16,MX1,NF2,OCLN,PDE10A,PGF,PIK3CA,PLAUR,PMS2,POLA1,POLE,PRKCE,PTPRZ1,RPTOR,S100A4,SENP1,SERTAD2,STAG2,STAT1,ST…	80
Hematological System Development and Function,Immunological Disease,Lymphoid Tissue Structure and Development,Organ Morphology,Organismal Development,Organismal Injury and Abnormalities,Tissue Morphology	Abnormal morphology of white pulp	8.62e-05			DIAPH1,E2F2,JAK3,LTB,NFKB2,SOCS1,SPIB,TEC,TP53	9
Cellular Development,Cellular Growth and Proliferation,Connective Tissue Development and Function,Tissue Development	Cell proliferation of fibroblasts	8.99e-05		-1.547	ADORA2A,ATF3,BRCA1,BRPF1,CCN3,CDC6,DCN,DHX9,ELN,ENG,EP300,EP400,ERCC6L,FOSB,FOSL2,FRS2,GADD45A,HBEGF,ITGA5,ITGB3,KMT2A,MAP2K3,MET,MMP2,NEU3,NF2,OGT,PARP10,PIK3CA,PLAUR,PLK2,PMS2,PPAT,PTGFR,PTPRZ1,SIN3A,SOCS1,SPARC,STAT1,TGFB2,TP53,USP7	42
Cancer,Organismal Injury and Abnormalities	Glandular intraepithelial neoplasm	9.14e-05		-1.131	ACP3,CEP95,CIPC,EXOC3,GATA3,GPC1,HAVCR1,KLF3,KRT7,LY6E,MUC16,MYO1F,NUP98,PDCD11,PIK3CA,PIM1,PLEKHB1,POLR3B,PTGDS,RAB11FIP2,RBM26,RDH8,SHOC1,SIM2,SOCS1,TP53,UTP20,VAV3,YTHDF1,ZBTB2,ZFAT,ZNF594	32
DNA Replication, Recombination, and Repair	Metabolism of DNA	9.96e-05		-0.707	ADRB1,ANKRD17,ATR,BCR,BRCA1,CDAN1,CDC25A,CDC6,DAPK1,DHX9,DNAJC2,E2F2,EIF2AK2,EP300,ERCC6L,HBEGF,IL5,ISG20,ITGB3,KPNB1,MCM2,MCM4,MET,NRG1,NUP98,ORC1,PIK3CA,POLA1,POLD4,POLE,PPIB,PPP1CC,PTPN11,REL,S100A4,SET,SIN3A,SLFN13,STAT1,TAF4B,TGFB2,TIAM1,TP53,TWNK,UCN	45
Neurological Disease	Progressive neurological disorder	0.000105	Increased	3.132	ACTA2,ADORA1,ADORA2A,ADRA1B,ADRB1,AMPD3,ANKRD34A,ATF3,BCR,BRCA1,BST2,CCL5,CD68,CLUH,COL1A1,COL1A2,COL3A1,DCN,DHX9,DNAJC6,EIF2AK2,EIF4A2,ELN,ELOVL7,EPS8L2,EPSTI1,ERVW-1,F3,FCGR1A,FRK,FRMD4B,GABRE,GADD45A,GCH1,GIGYF2,GNAL,GRHL2,GRIN2D,HAVCR1,HLA-F,HNRNPAB,HOMER1,IFIT1,IL18,IL1A,IL2RB,IRF7,IRGM,ISG15,ITGB3,KLF3,LRP8,LY6E,MATR3,MERTK,MMP2,MR1,MTR,MX1,NBAS,NEDD4,NEFL,NFKB2,NOM1,NRG1,OAS1,OAS3,OCLN,OGT…	102
Neurological Disease	Progressive motor neuropathy	0.000108	Increased	3.293	ADORA1,ADORA2A,ADRA1B,ADRB1,AMPD3,ATF3,BCR,BST2,CCL5,COL1A1,COL1A2,COL3A1,DNAJC6,EIF4A2,ELN,ELOVL7,EPSTI1,ERVW-1,FCGR1A,GABRE,GADD45A,GCH1,GIGYF2,GRIN2D,HAVCR1,HLA-F,IFIT1,IL18,IL1A,IL2RB,IRF7,IRGM,ISG15,ITGB3,LY6E,MATR3,MERTK,MR1,MTR,MX1,NEDD4,NEFL,NRG1,OAS1,OAS3,OCLN,PDE4D,PGF,PLK2,POLA1,POLE,PPARGC1B,PSMB8,RSAD2,S100A4,SETX,SHROOM3,SPARC,TP53,TRIM31,USP36	61
Cellular Development,Connective Tissue Development and Function,Tissue Development	Differentiation of connective tissue cells	0.000108		0.042	AAMDC,ADRB1,ARL4A,ATF3,AXIN1,CCL5,CCN3,CEACAM1,CLIC1,COL1A1,CREB5,DLX3,EIF2AK2,ELF4,EP300,FARP2,FOSL2,GATA2,GATA3,GREM1,GRK5,HIVEP2,HOXA11,IFI16,IFITM1,IFT80,IL18,IL1A,ITGA5,LGALS3BP,LIMD1,LRP8,LY6E,MAFB,MAP2K3,MAP3K14,MDK,MECOM,MITF,MMP13,NFKB2,NIPBL,NOCT,NRG1,PDLIM7,PER2,PGF,PLAC8,PLAUR,PPARGC1B,PRKCE,PSMB8,PTGDS,PTGFR,PTPN11,RASSF2,RPTOR,SIK3,SMURF1,SOCS1,STAT1,STAT5B,STEAP4,SUCO,SULT1E1,TGFB2…	70
Cancer,Endocrine System Disorders,Gastrointestinal Disease,Organismal Injury and Abnormalities	Pancreatic intraepithelial neoplasm	0.00011			CEP95,CIPC,EXOC3,HAVCR1,KLF3,MUC16,MYO1F,NUP98,PDCD11,PIK3CA,POLR3B,RAB11FIP2,RBM26,RDH8,SHOC1,SOCS1,TP53,UTP20,VAV3,YTHDF1,ZBTB2,ZFAT,ZNF594	23
Infectious Diseases	Infection of mammalia	0.000117		0.396	AIM2,ANTXR2,B2M,CEACAM1,CFTR,CSF3,DCN,DDX58,DHX58,EIF2AK2,FCGR1A,IFIH1,IL18,IL31RA,IL5,IRF7,IRF9,ISG15,LTB,MAP2K3,MMP2,NFKB2,OASL,PI3,PLAC8,PLAUR,PLEKHA7,PRKCE,PSMB9,REL,RELB,SELENOK,SPIB,STAT1,STING1,TAP1,TNFRSF9,USP18	38
Cancer,Dermatological Diseases and Conditions,Organismal Injury and Abnormalities	Skin carcinoma	0.000117			ADAD2,ADAMTSL3,AIM2,ANKRD36C,ARFGEF2,ATR,AXIN1,B3GALT5,BCLAF1,BCR,BEND3,BRCA1,BRPF1,BRPF3,C2CD4D,CACHD1,CAD,CASD1,CCDC87,CDH8,CIT,CLASP1,CLIC1,CLIP3,CLSTN3,CMPK2,COBL,COL1A2,COL4A5,COL9A2,CTSL,DAGLA,DHX58,DLX3,DNAH11,DNAH2,DNAH5,DTWD2,DZIP3,ENG,GALNT9,GNAL,GPM6A,GRHL2,HBEGF,HEATR1,IFI27,IFI35,IFI44,IFI6,IFITM1,IFT80,IRF7,ISG15,ISG20,ITGB3,JCAD,KDM4C,KIF3B,KLHL12,KRT7,LPCAT2,LRRC37A3 (includes oth…	120
Cellular Development,Cellular Growth and Proliferation,Hematological System Development and Function,Hematopoiesis	Proliferation of hematopoietic progenitor cells	0.000127	Decreased	-2.001	AXIN1,BCR,BRPF1,CEACAM1,CSF3,EIF2AK2,EPAS1,GATA2,GATA3,HIPK2,IL1A,JAG2,JAK3,KMT2A,LTB,MAFB,MECOM,MYH10,NUP214,NUP98,PLAGL2,PTPN11,RPTOR,SAMD9,SAMD9L,SET,SOCS1,SPIB,STAT1,TIMP3,TNFRSF9,TOX,TP53	33
Cellular Development,Cellular Growth and Proliferation,Hematological System Development and Function,Hematopoiesis,Lymphoid Tissue Structure and Development,Tissue Development	Development of antigen presenting cells	0.000128		-0.582	ADORA1,AKAP13,CSF3,DGCR8,FCGR1A,GATA2,GREM1,IL1A,IL2RB,JAK3,KMT2A,LTB,MAFB,MDK,MR1,NFKB2,RELB,RPTOR,SOCS1,SPIB,STAT1,STAT5B,USP18,VAV3,ZNF10	25
Cardiovascular Disease,Organismal Injury and Abnormalities	Aortic dilatation	0.000131		-0.314	ACTA2,ADORA2A,COL1A1,COL3A1,CTSL,ELN,HBEGF,LTB4R,MMP13,MMP2,PIM1,S100A4,TGFB2,TIMP3	14
Cellular Development,Cellular Growth and Proliferation,Hematological System Development and Function,Hematopoiesis,Lymphoid Tissue Structure and Development,Tissue Development	Development of macrophages	0.000131		-0.848	ADORA1,AKAP13,CSF3,DGCR8,GREM1,IL1A,KMT2A,MAFB,NFKB2,RELB,RPTOR,STAT1,VAV3,ZNF10	14
Cellular Growth and Proliferation,Connective Tissue Development and Function,Tissue Development	Proliferation of connective tissue cells	0.000135	Decreased	-2.034	ACACA,ADORA2A,ATF3,ATR,BRCA1,BRPF1,CASC3,CCN3,CDC6,CEACAM1,COL1A1,CSF3,DCN,DHX9,EIF2AK2,ELN,ENG,EP300,EP400,ERCC6L,FOSB,FOSL2,FRS2,GADD45A,GATA3,GREM1,HBEGF,HOXA11,IFI16,IL18,IL1A,ITGA5,ITGB3,KMT2A,MAP2K3,MDK,MET,MMP2,NEU3,NF2,NFKB2,OGT,PARP10,PGF,PIK3CA,PLAUR,PLK2,PMS2,PPAT,PTGFR,PTPRF,PTPRZ1,REL,RELB,RPS6KA3,SIN3A,SOCS1,SPARC,SRSF6,STAT1,STEAP4,TGFB2,TP53,TRAF4,USP7,VAV3	66
Cellular Assembly and Organization,Cellular Function and Maintenance	Organization of actin cytoskeleton	0.000138		-1.484	ABL2,ADRA1B,ARHGAP44,ARHGEF5,BCR,BST2,DIAPH1,DLG1,ENG,EPB41,EPB41L2,EPB41L5,FARP2,FMNL2,FNBP1,HIP1R,IL1A,ITGB3,LTB4R,MYH10,MYO1F,NF2,PDLIM7,PHACTR1,PPARGC1B,PTPN11,RND1,SHROOM2,SHROOM3,SPTAN1,STK35,TESK2,TGFB2,TMOD2,TNIK,TP53,TRIO	37
Cancer,Hematological Disease,Immunological Disease,Organismal Injury and Abnormalities	Chronic leukemia	0.00014			ABCC2,ABL2,ADAMTS16,AGL,ATR,ATRNL1,BCR,BIRC3,CLDN14,COL1A1,COL1A2,DAGLA,DAPK1,DDX58,DNAH5,ENC1,EPAS1,FAM168A,GABRE,GATA2,HOOK1,IL2RB,IL5,JAK3,KMT2A,MAGI1,MR1,MTUS1,MYH10,NALCN,NCOA6,PDE4D,PGF,PIM1,PKD1L2,POLA1,POLE,POLQ,PPAT,PPTC7,PRDM15,PTPN11,PTPRZ1,RASSF5,SIPA1L3,SOX30,SPEN,STAG2,STEAP4,STRN3,TP53,TRIO,UBE3C,UVSSA,XPO1,ZNF10,ZNF551	57
Neurological Disease,Skeletal and Muscular Disorders	Neuromuscular disease	0.000141	Increased	2.556	ADORA1,ADORA2A,ADRA1B,ADRB1,ANKRD2,APLP1,ARHGEF7,B2M,BCR,BST2,CCL5,CD48,CD68,CIPC,DDX42,DNAJC6,DOK7,DUSP5,DYNLT1,EIF4A2,ELOVL7,EPSTI1,ERVW-1,F3,FCGR1A,FRMD4B,GABRE,GADD45A,GCH1,GIGYF2,GNAL,GNG3,GRIN2D,HAVCR1,HLA-F,HOMER1,HOXC6,IFIT1,IL18,IL1A,IL2RB,IRF7,IRGM,ISG15,ITGB3,ITIH4,KLF3,LIMK1,LY6E,MAL2,MAST3,MERTK,MR1,MT1G,MT2A,MTR,MX1,NEDD4,NEFL,NRG1,OAS1,OAS3,OCLN,PCDH7,PDE10A,PDE4D,PDLIM7,PGF,PLAAT4…	92
Cell-To-Cell Signaling and Interaction,Cellular Function and Maintenance,Humoral Immune Response,Inflammatory Response	Phagocytosis of lymphoma cell lines	0.000143			FCGR1A,HAVCR1,LIMK1,MERTK	4
Cancer,Neurological Disease,Organismal Injury and Abnormalities	Oligodendroglioma	0.000146			ABHD12B,ANKRD34A,ARID2,CCDC40,EP300,FRMD4B,LIMK1,LY6E,MECOM,MET,MUC16,NF2,NIPBL,NOM1,PIK3CA,POGZ,POU3F1,PPIB,PREPL,STAG2,STRN3,TP53,TRIO,VCPIP1,ZBTB37	25
Cancer,Hematological Disease,Organismal Injury and Abnormalities	Myelodysplastic syndrome	0.000148			ADORA1,ADORA2A,CIPC,EIF2AK2,ENG,EP300,FRMD4B,GABRE,GATA2,GRIN2D,HOOK1,IFIT1,IFITM1,IL2RB,JAK3,KCNJ15,KLF3,KMT2A,LY6E,MGA,MMP2,MOGAT3,MR1,MSH6,MYH10,POLA1,POLE,PPAT,PRPF8,PTPN11,RLF,SAMD9,STAG2,STRN3,TP53,TRIO,WDR31,XPO1	38
Cellular Growth and Proliferation	Colony formation	0.000149		-1.258	ATF3,ATR,BCR,BRCA1,CABLES1,CEACAM1,CLEC11A,CSF3,DCN,DGCR8,DOT1L,DUSP5,EIF2AK2,ELF3,EP400,EPAS1,FRS2,GADD45A,GSE1,HOXA11,IFI16,IFIH1,IFITM3,IL1A,IL5,KMT2A,LY6E,MAP3K21,MDK,MECOM,MET,MITF,MMP2,NF2,NRG1,PAK2,PELP1,PHC3,PHLPP2,PIK3CA,PIM1,PLAUR,PLCD4,PLSCR1,PPARGC1B,PTPN11,PTPRF,RASSF2,RASSF5,RHOBTB2,RPS6KA3,SENP1,SOCS1,SPARC,SPIB,STAT5B,TFR2,TGFB2,TIAM1,TOX,TP53,TRAF4,VAV3,WWC1,ZNF10	65
Cardiovascular System Development and Function	Development of vasculature	0.000152		-1.171	ABL2,ACTA2,ADORA2A,ADRA1B,ADRB1,AGTRAP,ANGPTL4,ANKRD17,ANTXR2,AP4E1,ARHGEF26,ATF3,BACH1,BCLAF1,BRCA1,BRPF1,CCL28,CCL5,CCN3,CEACAM1,CHM,COL1A1,COL1A2,COL3A1,CPLANE1,CRELD1,CSF3,CXCL5,DCN,DGCR8,DLG1,DLX3,ELN,ENG,EPAS1,F3,FERMT2,FRS2,GADD45A,GATA2,GJC1,GPC1,GREM1,HBEGF,HIPK2,HSPB6,IFI16,IL18,IL1A,ITGA5,ITGB3,KAT6A,KMT2A,LRP8,LTB4R,MAP2K3,MDK,MERTK,MESP2,MET,MIB1,MMP13,MMP2,MYH10,MYO9B,MYOF,NRARP,NRG…	110
Cellular Development,Cellular Growth and Proliferation,Hematological System Development and Function,Hematopoiesis,Lymphoid Tissue Structure and Development,Tissue Development	Differentiation of antigen presenting cells	0.000153		-0.259	ADORA1,BCR,CLEC11A,CSF3,DUSP5,FCGR1A,GATA2,GREM1,IL1A,IL2RB,IL5,IRF7,JAK3,KMT2A,LTB,MAP3K14,MDK,MR1,NFKB2,PTPN11,RELB,RPTOR,SOCS1,SPIB,STAT1,STAT5B,TP53,USP18	28
Cancer,Neurological Disease,Organismal Injury and Abnormalities	Brain glioma	0.000157			ABHD12B,AGAP5 (includes others),ANKRD18B,ANKRD31,ANO2,ARHGAP5,ARID2,ATR,BRCA1,CCDC40,CDH8,CFTR,CHERP,COBL,COL1A1,CUL3,DCAF4,DST,EIF5B,ELOVL7,EP300,GALNT5,GRK5,GSTM5,HAVCR1,IFITM3,JAK3,JPH1,LIMK1,MAPK8IP2,MECOM,MED12,MESP2,MET,MSH6,MUC16,MYO1D,NF2,NIPBL,OTUD4,PABPC1,PCDHGA4,PCNT,PIK3CA,PKD1L2,POGZ,POLA1,POLE,PPIB,PREPL,PTPN11,PTPRZ1,RAVER1,RDH8,RGPD4 (includes others),RIMS2,RIPK4,RPTOR,SEC14L4,SEN…	72
Inflammatory Disease,Neurological Disease,Skeletal and Muscular Disorders	Multiple Sclerosis	0.000158	Increased	2.985	ADRA1B,ADRB1,BST2,EPSTI1,ERVW-1,FCGR1A,GABRE,GRIN2D,HAVCR1,HLA-F,IFIT1,IL18,IL2RB,IRF7,IRGM,ISG15,ITGB3,LY6E,MERTK,MR1,MTR,MX1,OAS1,OAS3,OCLN,PGF,POLA1,POLE,PSMB8,RSAD2,TRIM31	31
Cardiovascular System Development and Function,Tissue Morphology	Morphology of aorta	0.00016			ACTA2,COL3A1,ELN,KAT6A,LTB4R,MIB1,MMP2,MYH10,TFAP2A,TGFB2,TIMP3,TLL1	12
Organismal Development,Organismal Injury and Abnormalities	Abnormal morphology of thoracic cavity	0.000164			ABL2,ACTG2,ADORA1,ADORA2A,ADRA1B,ADRB1,AKAP13,ANKRD17,ARHGAP5,ATF3,ATXN1L,BIRC3,BRCA1,CCN3,CCNT1,CELSR3,CFTR,COL3A1,COL9A2,CSF3,CYP1A1,CYP26A1,DCN,DGCR8,DLX3,DNAH11,DOK7,DOT1L,DUSP5,ELN,EP300,EPAS1,F3,FAM20A,FBXO32,FOXP4,GATA2,GRK5,HBEGF,HIVEP2,IL18,IL5,IRX4,ITGB3,JAG2,JAK3,KAT6A,KIF3B,LTB,LY6E,MAN2A2,MAP2K3,MAP3K14,MECOM,MESP2,MFAP4,MIB1,MMP2,MYH10,MYH14,MYLK3,NEDD4L,NFKB2,PGF,PIK3CA,PIM1,PKP2,P…	93
Cancer,Organismal Injury and Abnormalities,Reproductive System Disease	HER2-positive carcinoma of breast	0.000168			ABL2,DAPK1,DST,ELOVL7,EVPL,KLHL12,MYO6,NIPBL,OPA1,PIK3CA,PIP4K2A,PLCD4,PLEKHG4,PTPRZ1,PUM2,RPGRIP1L,RPS6KA3,TEX14,TP53,TRIP12,USP7,ZFAT,ZNF598	23
Cellular Development,Cellular Growth and Proliferation,Hematological System Development and Function,Hematopoiesis	Proliferation of hematopoietic cells	0.000171	Decreased	-2.185	AXIN1,BCR,BRPF1,CEACAM1,CSF3,EIF2AK2,EPAS1,GATA2,GATA3,HIPK2,IL1A,JAG2,JAK3,KMT2A,LTB,MAFB,MECOM,MYH10,NUP214,NUP98,PIM1,PLAGL2,PTPN11,RPTOR,SAMD9,SAMD9L,SET,SOCS1,SPIB,STAT1,TIMP3,TNFRSF9,TOX,TP53	34
Cancer,Organismal Injury and Abnormalities	Metastasis of cells	0.000173		-1.367	ABLIM1,ANGPTL4,ANTXR2,ASAP1,ATF3,B2M,BACH1,BRCA1,CDC25A,CSF3,CXCL5,CYP26A1,DAPK1,F3,FNBP1L,GSE1,HCAR1,HNRNPAB,IL18,IRF7,MAGI1,MAP2K3,MET,MMP2,MTUS1,NF2,PGF,PIK3CA,PLAUR,PTPN11,PTPRZ1,RPS6KA3,RPTOR,S100A4,SOCS1,SRSF6,TBC1D16,TP53,TRAF4,VAV3	40
Cellular Development,Cellular Growth and Proliferation,Nervous System Development and Function,Tissue Development	Development of Schwann cells	0.000175		-1.067	ADORA2A,DDIT4,MED12,NF2,NRG1,POU3F1,PTPN11	7
Cell Cycle	Arrest in G1 phase	0.00018			AMH,BCR,BRCA1,CAMKK1,CDC25A,CDC6,CSF3,DCN,DLX3,DOT1L,E2F2,EP300,EP400,GADD45A,HASPIN,HAVCR1,IL1A,ITGA5,JAK3,KMT2A,KPNB1,MAP2K3,MCM2,MET,NOCT,PIM1,PLSCR1,PPARGC1B,PRPF8,REL,RPS6KA3,SPTAN1,TFAP2C,TFCP2,TP53,USP36	36
Cellular Movement,Hematological System Development and Function,Immune Cell Trafficking	Cell movement of leukocytes	0.000182		-0.942	ADORA1,ADORA2A,AGTRAP,AIM2,ARHGEF5,ARHGEF7,CCL28,CCL5,CCNT1,CD48,CEACAM1,CFTR,CLEC11A,COL1A1,CSF3,CXCL5,DCN,DDX58,DEFB103A/DEFB103B,DGCR8,DIAPH1,ELF4,ELN,ENG,EPAS1,F3,GATA3,GREM1,HAVCR1,IL18,IL1A,IL2RB,IL5,ITGA5,ITGB3,JAK3,LIMK1,LTB,LTB4R,MAP3K14,MASP2,MDK,MET,MIB1,MMP2,MPP1,MR1,MYLK3,MYO1F,MYO9B,NFKB2,OCLN,OPA1,PDE4D,PGF,PIK3CA,PLAUR,PLTP,PPIB,PSMB8,PTGDS,PTPN11,RASSF5,REL,RELB,RPS6KA3,RPTOR,S10…	85
Cellular Development,Cellular Growth and Proliferation,Connective Tissue Development and Function	Proliferation of fibroblast cell lines	0.000186		-1.826	ABL2,ADRA1B,AXIN1,BRCA1,BRF1,BRPF1,CDC25A,CEACAM1,COL1A1,DGCR8,DHX9,E2F2,EIF2AK2,GADD45A,GRHL2,GRK5,HBEGF,HIPK2,IFI16,KMT2A,MAP2K3,MDK,MERTK,MET,MITF,NF2,ODC1,PAK2,PELP1,PIK3CA,PIM1,PLAC8,PLAGL2,PLAUR,PLSCR1,PPIF,PRKCE,PRPF19,PTPN11,RASSF5,RPS6KA3,RPTOR,SFPQ,SOCS1,STAT1,TP53,TRIP12,TTLL4	48
Cellular Development	Epithelial-mesenchymal transition	0.000186		0.097	B2M,BRCA1,BTBD7,CDC6,CXCL5,EPB41L5,ESRP2,GATA3,GRHL2,HNRNPAB,HOOK1,ITGB3,JAG2,MDK,MESP2,MMP2,NRG1,PIK3CA,PLAUR,PTPN11,PTPRZ1,RLIM,RPTOR,S100A4,SERPINB3,SIM2,TGFB2,TP53,TRAF4,TRIO,WWC1	31
Cancer,Hematological Disease,Immunological Disease,Organismal Injury and Abnormalities	T-lymphoblastic leukemia/lymphoma	0.000189			ABL2,ADORA1,ADORA2A,EP300,GATA2,GATA3,IKZF2,JAK3,KMT2A,LRRC37A3 (includes others),MGA,NUP98,PIK3CA,PMS2,POLA1,POLE,PPAT,PTPN11,RPTOR,STAG2,STAT5B,TP53,TXLNG,USP7,XPO1	25
Cardiovascular System Development and Function,Embryonic Development,Organ Development,Organismal Development,Tissue Development	Cardiogenesis	0.000191		-0.771	ADRA1B,AKAP13,ANKRD17,AP4E1,ARID2,BICC1,BRCA1,BVES,CCDC40,CCL5,CCN3,COL3A1,CPLANE1,CRELD1,CSF3,CYP26A1,DNAAF1,DNAH11,DNAH5,ENG,EP300,FMNL2,FOXP4,FRS2,GATA3,GJC1,GRK5,HBEGF,IFI16,IRX4,KAT6A,LY6E,MATR3,MECOM,MED12,MIB1,MMP13,MMP2,MTHFD1,MYH10,MYH14,MYLK3,MYO9B,NCOA6,NIPBL,NRG1,PGF,PHLPP2,PIM1,PKP2,PPARGC1B,PTPN11,RPGRIP1L,SCG5,SPEN,SPTBN1,TGFB2,TLL1,TP53,UTRN	60
Cell Cycle	Cleavage of cells	0.000193		-1.538	CDC25A,CLASP1,CSF3,CUL3,DIAPH1,IL2RB,IL5,IRGM,KIF14,NEFL,NFKB2,NUMA1,ODC1,OPA1,PIK3CA,PPP1CC,RELB,SAMD9,SAMD9L,SENP5,SOCS1,TGFB2,TP53	23
Cardiovascular Disease,Organismal Injury and Abnormalities	Aortic aneurysm	0.000198		-0.747	ACTA2,ADORA2A,COL1A1,COL3A1,CTSL,ELN,LTB4R,MMP13,MMP2,PIM1,S100A4,TGFB2,TIMP3	13
Cellular Development,Cellular Growth and Proliferation,Nervous System Development and Function,Tissue Development	Myelination of Schwann cells	0.000198		-1.067	ADORA2A,DDIT4,NF2,NRG1,PTPN11	5
Digestive System Development and Function	Morphology of digestive system	0.000201			ABCC2,AGL,ANGPTL4,ATF3,B2M,BCR,BRCA1,BTBD7,CEACAM1,CFTR,COL3A1,CUL3,CYP1A1,DCN,DDX58,DLG1,E2F2,FAM20A,GCSAM,HELZ2,HIPK2,IL5,JAK3,KAT6A,LTB,MAN2A2,MAP3K14,MAPK8IP2,MBD5,MDK,MERTK,MET,MYH10,NEU3,NFKB2,OCLN,ODC1,PLAGL2,PMS2,POLR3B,PPARGC1B,PPP1R15B,PTPN11,REL,RELB,RPS6KA3,SCG5,SENP1,SGMS1,SIK3,SIM2,SLC12A2,SLC22A4,SLC51A,SLC9A2,SOCS1,SOX7,SPEN,SPIB,SPTBN1,STAT1,STAT5B,STEAP4,TFAP2A,TGFB2,TIMP3,TNFRS…	75
Cellular Movement	Cell movement of myeloid cells	0.000214		-1.236	ADORA1,ADORA2A,AGTRAP,AIM2,ARHGEF7,CCL28,CCL5,CD48,CEACAM1,CFTR,CLEC11A,COL1A1,CSF3,CXCL5,DEFB103A/DEFB103B,DGCR8,ELN,ENG,EPAS1,F3,GREM1,HAVCR1,IL18,IL1A,IL2RB,IL5,ITGB3,JAK3,LIMK1,LTB,LTB4R,MASP2,MDK,MET,MPP1,MYLK3,MYO1F,MYO9B,OCLN,OPA1,PDE4D,PGF,PLAUR,PLTP,PSMB8,PTGDS,PTPN11,REL,RPS6KA3,RPTOR,S100A4,SELENOK,SEMA3E,SOCS1,STAT1,STING1,TGFB2,TIMP3,TNFRSF9,TNIP1,TP53,TRPC6,VAV3	63
Cellular Movement	Cellular infiltration	0.000215		0.081	ADORA2A,AGTRAP,AIM2,CCL5,CCNT1,CD48,CFTR,CSF3,CXCL5,DCN,DGCR8,E2F2,ENG,F3,HAVCR1,HNRNPAB,IL18,IL1A,IL2RB,IL5,ITGB3,JAK3,LIMK1,LTB,LTB4R,MAP3K14,MASP2,MDK,MET,MIB1,MMP2,NFKB2,OPA1,PGF,PLAUR,PLTP,PSMB8,PTPN11,RELB,RPS6KA3,RPTOR,SEMA3E,SOCS1,SPARC,STAT1,STAT5B,STING1,TIMP3,TNFRSF9,TNIP1,TP53,UTRN,VAV3	53
Cell Death and Survival	Cell viability of lymphoma cell lines	0.000224	Decreased	-3.205	AGA,ARFGEF2,ATF3,DHX9,HBEGF,JAK3,MAP3K14,MECOM,PIK3CA,REL,RELB,SPIB,TFEB,TOX,TP53	15
Cell Cycle	G1 phase of lymphatic system cells	0.000224			HAVCR1,JAK3,KMT2A,REL,RPTOR,STING1,TP53	7
Inflammatory Response	Rejection	0.000236			ADORA1,ADORA2A,B2M,CD48,CEACAM1,FCGR1A,GABRE,GRIN2D,HAVCR1,LY6E,MMP2,MMP24,MR1,PDE4D,PPAT,TNFRSF9	16
Cell Cycle	G1 phase of blood cells	0.000238			DCN,HAVCR1,KMT2A,PLAGL2,REL,RPTOR,STING1,TP53	8
Inflammatory Response,Organismal Injury and Abnormalities	Graft rejection	0.000252			ADORA1,ADORA2A,B2M,CD48,FCGR1A,GABRE,GRIN2D,HAVCR1,LY6E,MMP2,MMP24,MR1,PDE4D,PPAT	14
Cancer,Gastrointestinal Disease,Organismal Injury and Abnormalities	Gastroesophageal adenocarcinoma	0.000255			ACMSD,ADAMTS16,AIM2,ANAPC1,ANKRD36C,ANTXR2,ARFGEF2,ARID2,ATR,AXIN1,AZGP1,B2M,BRPF1,BTBD7,C1orf116,CASC3,CASD1,CCDC40,CDAN1,CDC6,CEP250,CEP95,CLSTN3,COL1A2,CPAMD8,CPLANE1,CYP26A1,DAGLB,DDHD1,DHX38,DNAH2,DNAH5,DNAJC6,DOCK3,DOT1L,DPY19L3,DST,EIF5B,ENG,EP300,EP400,EXPH5,FBXO32,FNBP4,FOXJ3,FRK,GATA3,GSE1,HEATR1,HIPK2,HIVEP2,IFI16,IGFLR1,JAK3,JCAD,KAT6A,KAT6B,KCNQ5,KIAA0930,KLF3,KMT2A,LY6E,MAP7D2,MAST4…	145
Immunological Disease	Immunodeficiency	0.000258			ADRA1B,B2M,DGCR8,EP300,FCGR1A,IFI27,IFIT1,IL2RB,IL5,IRF7,ISG15,JAK3,LY6E,MAP3K14,MASP2,MTHFD1,MX1,NFKB2,OAS1,POLE,POU3F1,RBCK1,RELB,RNF168,STAT1,STAT5B,TAP1,TRIO,UNG	29
Cell Cycle	Arrest in interphase	0.000271			AMH,ATR,BCR,BRCA1,CAMK2N1,CAMKK1,CDC25A,CDC6,CSF3,DCN,DLX3,DOT1L,E2F2,EIF2AK2,EP300,EP400,FAM168A,GADD45A,GNL3L,GPC1,HASPIN,HAVCR1,IL1A,ITGA5,JAK3,KMT2A,KPNB1,LIMK1,MAP2K3,MCM2,MET,MSH5,MUC16,NOCT,NRG1,PIM1,PLAUR,PLSCR1,PPARGC1B,PRPF8,PTPN11,RBCK1,REL,RPS6KA3,SPTAN1,STAT1,TFAP2C,TFCP2,TONSL,TP53,USP36	51
Neurological Disease,Organismal Injury and Abnormalities	Extensive intracranial calcification	0.000275			ISG15,OCLN,SLC20A2,USP18	4
RNA Post-Transcriptional Modification	Unwinding of RNA	0.000275			DDX21,DDX58,EIF4A2,EIF4B	4
Cellular Development,Cellular Growth and Proliferation	Colony formation of cells	0.000283		-0.305	ATF3,ATR,BCR,BRCA1,CABLES1,CEACAM1,CLEC11A,CSF3,DCN,DGCR8,DOT1L,DUSP5,EIF2AK2,ELF3,EP400,EPAS1,FRS2,GADD45A,GSE1,IFI16,IFIH1,IFITM3,IL1A,IL5,KMT2A,LY6E,MDK,MECOM,MET,MITF,MMP2,NF2,NRG1,PELP1,PHC3,PHLPP2,PIK3CA,PLCD4,PLSCR1,PPARGC1B,PTPN11,PTPRF,RASSF2,RASSF5,RHOBTB2,RPS6KA3,SENP1,SOCS1,SPARC,SPIB,STAT5B,TFR2,TGFB2,TIAM1,TP53,TRAF4,VAV3,WWC1,ZNF10	59
Cellular Movement,Hematological System Development and Function,Immune Cell Trafficking,Inflammatory Response	Cell movement of phagocytes	0.000293		-0.793	ADORA1,ADORA2A,AGTRAP,AIM2,ARHGEF5,ARHGEF7,CCL5,CEACAM1,CFTR,CLEC11A,COL1A1,CSF3,CXCL5,DEFB103A/DEFB103B,DGCR8,DIAPH1,ELN,ENG,EPAS1,GREM1,HAVCR1,IL18,IL1A,IL5,ITGA5,ITGB3,JAK3,LIMK1,LTB,LTB4R,MASP2,MDK,MET,MPP1,MYLK3,MYO1F,MYO9B,OCLN,OPA1,PDE4D,PGF,PIK3CA,PLAUR,PLTP,PSMB8,PTGDS,PTPN11,REL,RPS6KA3,RPTOR,S100A4,SELENOK,SEMA3E,SOCS1,STAT1,STING1,TGFB2,TIMP3,TNFRSF9,TNIP1,TP53,TRPC6,VAV3	63
Cellular Development,Cellular Growth and Proliferation	Cell proliferation of breast cancer cell lines	0.000305	Decreased	-2.665	AIM2,AMH,AP1G1,BRCA1,CCN3,CEACAM1,CYP26A1,DCN,DGCR8,DUSP5,EIF3A,ELF3,EP300,F3,GATA3,GPC1,GRHL2,HBEGF,HIC1,HOXA11,IFITM3,ITCH,ITGA5,ITGB3,MAP2K3,MAP3K21,MET,MIDEAS,MTUS1,MUC16,NCAPD2,NEDD4,NRG1,OAS3,ODC1,OGT,PELP1,PIK3CA,PIM1,PLAAT4,PLAUR,PLCD4,PPARGC1B,PRKCE,RBCK1,RHOBTB2,RPTOR,S100A4,SIM2,STAT5B,SULT1E1,TFAP2A,TFAP2C,TP53,USP36,UTRN	56
Inflammatory Disease,Inflammatory Response,Skeletal and Muscular Disorders	Inflammation of muscle	0.000306		-0.194	FBXO32,FCGR1A,IL1A,IL5,ITGB3,OPA1,PPAT,RELB,SOCS1,SYT7,UTRN	11
Embryonic Development,Organismal Development,Tissue Development	Formation of somites	0.000309			BRCA1,ENG,EP300,ITGA5,MECOM,MESP2,MIB1,NRARP,PTPN11	9
Digestive System Development and Function,Gastrointestinal Disease,Hematological System Development and Function,Lymphoid Tissue Structure and Development,Organ Morphology,Organismal Development,Organismal Injury and Abnormalities,Tissue Morphology	Abnormal morphology of Peyer's patches	0.000309			DDX58,GCSAM,JAK3,LTB,MAP3K14,NFKB2,SPIB,TOX,TP53	9
Neurological Disease,Skeletal and Muscular Disorders	Progressive neuromuscular disease	0.00031	Increased	3.138	ADORA1,ADORA2A,ADRA1B,ADRB1,BCR,BST2,CCL5,DNAJC6,EIF4A2,ELOVL7,EPSTI1,ERVW-1,FCGR1A,GABRE,GCH1,GIGYF2,GRIN2D,HAVCR1,HLA-F,IFIT1,IL18,IL1A,IL2RB,IRF7,IRGM,ISG15,ITGB3,LY6E,MERTK,MR1,MTR,MX1,NEDD4,NRG1,OAS1,OAS3,OCLN,PDE4D,PGF,PLK2,POLA1,POLE,PSMB8,RSAD2,TP53,TRIM31,USP36	47
Gastrointestinal Disease,Inflammatory Disease	Inflammatory Bowel Disease	0.00031			ADORA1,ADORA2A,B2M,BIRC3,CIPC,COL1A1,COL1A2,CXCL5,EP300,FOSL2,FRMD4B,GABRE,GATA2,GRIN2D,GRK5,IKZF2,IL18,IL1A,IL5,IRGM,ITGB3,JAK3,KLF3,LRP8,LY6E,MDC1,MERTK,MMP2,NICN1,NOM1,PDE4D,PI3,POU3F1,PPAT,SLC22A4,SOCS1,STEAP4,TGFB2,TIAM1,TP53,TRIO,UBA7,UNC13D,USP7,WWC1	45
Cellular Function and Maintenance	Function of blood cells	0.000316		-0.837	AIM2,AKAP13,AMPD3,ARHGEF5,ATF3,B2M,BIRC3,CCL5,CCN3,CEACAM1,CSF3,DDX58,DLG1,DUSP5,ELF4,F3,FCGR1A,GATA2,HAVCR1,HSH2D,IFIH1,IL18,IL31RA,IL5,IRF7,ITGB3,JAK3,LIMD1,LTB,LTB4R,MAP2K3,MECOM,MERTK,MYO9B,NFKB2,NSMAF,PER2,PIM1,PLAUR,RAB27B,RASSF5,REL,RELB,S100A4,SELENOK,SOCS1,STAT1,STAT5B,SULT1E1,TAP1,TEC,TGFB2,TNFRSF9,TP53,TRAF4	55
Cancer,Dermatological Diseases and Conditions,Organismal Injury and Abnormalities	Basal cell carcinoma	0.000317			AIM2,ANKRD36C,ARFGEF2,BCLAF1,BCR,BRCA1,CACHD1,CDH8,CIT,CLSTN3,COL4A5,COL9A2,DNAH11,DZIP3,GRHL2,HEATR1,IFI35,IFI44,IFI6,IFITM1,IRF7,ISG15,ISG20,ITGB3,KIF3B,LRRC37A3 (includes others),MUC16,MX1,NCOA6,OAS1,OAS2,OASL,ODC1,OTUD4,PABPC1,PCDH7,PDE10A,PI16,PIK3CA,PKD1L2,PLAAT4,PMS2,POLE,POLQ,PRPF19,RSAD2,SAMD9L,SENP3,SLC12A5,SP100,STAT1,STAT5B,TJP1,TNFAIP2,TP53,TPM2,TYRP1,UTP20,VAV3,VWDE,WWC1	61
Cancer,Hematological Disease,Immunological Disease,Organismal Injury and Abnormalities	Chronic lymphocytic leukemia or small lymphocytic lymphoma or prolymphocytic leukemia	0.000341			ARHGAP42,BICC1,BIRC3,CEP250,CEP350,CNOT1,COL3A1,COL4A5,CPSF7,DAPK1,DDX58,DGKD,DLG1,DNAH5,DST,EP300,FANCB,GSE1,IL5,JAK3,KMT2A,MED12,MGA,MR1,MUC16,MYOF,NUP98,PAPLN,PDE4D,PIM1,POLA1,POLE,POLR3B,PTPN11,RASSF5,RBCK1,RTN2,S100A4,SBNO1,SEC14L1,SEMA3E,SHANK3,SHROOM2,SHROOM3,SIPA1L3,SMCO2,SPEN,STAT5B,STRN3,TEX14,TFCP2,TNIK,TP53,TRAF1,TRIM55,TRIO,TRIP12,TTC21B,USP2,VAV3,VWDE,XPO1,ZNF292	63
Cell Death and Survival	Cell death of blood cells	0.000342		0.327	ADORA2A,ADRB1,AGA,AIM2,ANTXR2,ATF3,BCR,BIRC3,BRCA1,CCL5,CD48,CLEC11A,COL1A1,CSF3,DAPK1,DCN,DDIT4,DGCR8,DHX58,DOT1L,DUSP5,E2F2,EIF2AK2,EIF4B,EP300,EPAS1,FCGR1A,GATA2,GATA3,GRK5,HIPK2,HSH2D,IFIH1,IKZF2,IL18,IL1A,IL2RB,IL5,ISG15,ITGA5,JAK3,KMT2A,LTB,MAP2K3,MAP3K14,MECOM,MERTK,MET,MX1,NFKB2,OGT,PARP14,PIK3CA,PIM1,PRKCE,PTPN11,REL,RELB,RPTOR,SLC46A1,SOCS1,SPIB,STAT1,STAT5B,STING1,TAF4B,TFR2,TGFB2,TNFR…	72
Cellular Movement	Homing of cells	0.000345		-0.084	ADORA1,ADORA2A,ARHGEF5,ARHGEF7,BCR,CCL28,CCL5,CCN3,CEACAM1,CSF3,CXCL5,DEFB103A/DEFB103B,DIAPH1,ELF4,ELN,ENG,FRS2,GATA3,GREM1,HAVCR1,HBEGF,HOMER3,IL18,IL1A,IL5,ITCH,ITGA5,ITGB3,JAG2,JAK3,LIMK1,LTB4R,MAP3K14,MDK,MET,MMP2,MPP1,MYH10,MYO1F,MYO9B,NEDD4,NFKB2,NRG1,NUS1,PDE4D,PGF,PIK3CA,PLAUR,PPIB,PTPN11,PTPRZ1,RAB11FIP1,REL,RELB,S100A4,SELENOK,SEMA3E,SOCS1,TGFB2,TIAM1,TRPC6,VAV3	62
Cell Cycle	Arrest in interphase of colorectal cancer cell lines	0.000349			BRCA1,CAMK2N1,CDC6,EP300,GADD45A,GNL3L,ITGA5,MET,PRPF8,TP53,USP36	11
Cellular Assembly and Organization	Development of cytoplasm	0.00036		-0.461	ABL2,ADORA1,ADORA2A,AKAP13,ANKRD13B,ARFGEF1,ARHGEF5,ATG2A,CAMSAP1,CAMSAP2,CEACAM1,CLASP1,CLIP3,COBL,CSF3,CUL3,DIAPH1,DLG1,ELN,GJC1,HIP1R,IL1A,IRGM,ITGB3,LETM1,LIMK1,MAGI1,MAP7D3,MET,MMP2,MYH14,NEFL,NF2,NUMA1,OPA1,PEX6,PHACTR1,PHLDB2,PPARGC1B,PRKCE,PTGDS,PTPN11,RND1,SENP1,SPARC,STARD13,STING1,TESK2,TFAP2A,TFEB,TIAM1,TPM2,TRPC6,UCN,UTRN,XPO1	56
Digestive System Development and Function,Gastrointestinal Disease,Hepatic System Development and Function,Hepatic System Disease,Inflammatory Disease,Inflammatory Response,Organ Development,Organismal Injury and Abnormalities	Inflammation of liver	0.00036		-0.187	ABCC2,ACTA2,ADORA1,ADORA2A,BIRC3,CCL5,CD48,COL3A1,CXCL5,DDX58,E2F2,FCGR1A,GABRE,IL18,IL2RB,IL5,LTB,MAP3K14,MMP2,MTR,NOM1,NUP98,OCLN,PDE4D,PLAUR,POLA1,PPAT,PTPN11,RELB,RPTOR,S100A4,SCG5,SOCS1,SPARC,STAT1,TIMP3,TNFRSF9,TNIP1,TP53	39
Antimicrobial Response,Inflammatory Response	Antiviral response of cells	0.000363		0.922	BIRC3,DDX58,DHX58,EIF2AK2,IFIH1,ITCH,SOCS1,STAT1,TP53	9
Cardiovascular System Development and Function,Organismal Development	Angiogenesis	0.000372		-1.171	ADORA2A,AGTRAP,ANGPTL4,ANKRD17,ANTXR2,AP4E1,ARHGEF26,ATF3,BCLAF1,BRCA1,BRPF1,CCL28,CCL5,CCN3,CEACAM1,CHM,COL1A1,COL1A2,COL3A1,CPLANE1,CSF3,CXCL5,DCN,DGCR8,DLG1,DLX3,ELN,ENG,EPAS1,F3,FERMT2,FRS2,GADD45A,GATA2,GJC1,GPC1,GREM1,HBEGF,HIPK2,HSPB6,IFI16,IL18,IL1A,ITGA5,ITGB3,KAT6A,KMT2A,LRP8,LTB4R,MAP2K3,MDK,MERTK,MET,MIB1,MMP13,MMP2,MYH10,MYO9B,MYOF,NRARP,NRG1,NUS1,ODC1,OGT,PATJ,PGF,PIK3CA,PIM1,PLAUR,…	97
Cardiovascular System Development and Function,Organismal Development	Vasculogenesis	0.000373		-0.901	ADORA2A,AGTRAP,ANGPTL4,ANKRD17,ANTXR2,AP4E1,ARHGEF26,ATF3,BCLAF1,BRPF1,CEACAM1,COL1A1,COL1A2,CPLANE1,CSF3,DCN,DGCR8,DLG1,ELN,ENG,EPAS1,F3,FERMT2,FRS2,GADD45A,GJC1,GPC1,HBEGF,HIPK2,IFI16,IL18,IL1A,ITGA5,ITGB3,KAT6A,KMT2A,LRP8,LTB4R,MAP2K3,MDK,MERTK,MET,MIB1,MMP13,MMP2,MYH10,MYO9B,MYOF,NRARP,NRG1,NUS1,ODC1,OGT,PATJ,PGF,PIK3CA,PIM1,PLAUR,PLXDC1,POLD4,PPARGC1B,PRKCE,PTPRZ1,RDH8,RND1,ROBO4,RPTOR,S100A…	81
Cellular Growth and Proliferation	Arrest in proliferation of cells	0.000375			BRCA1,BRF1,DGCR8,DUSP5,EIF2AK2,ENG,EP300,GADD45A,HIPK2,IL5,ITGB3,MAP2K3,MDK,MITF,MYBL1,OGT,PIK3CA,PPP1CC,RASSF5,SLC7A5,SOCS1,STAT1,TGFB2,TP53,TRIP12,USP7	26
Cancer,Cellular Development,Cellular Growth and Proliferation,Organismal Injury and Abnormalities	Development of tumor cells	0.000376		0.847	ATF3,BCR,CEACAM1,DCN,DGCR8,MET,MSH6,PHC3,PTPN11,RHOBTB2,TGFB2,TP53	12
Cancer,Hematological Disease,Immunological Disease,Organismal Injury and Abnormalities	Chronic lymphocytic leukemia / small lymphocytic lymphoma	0.000377			ARHGAP42,BICC1,BIRC3,CEP250,CEP350,CNOT1,COL3A1,COL4A5,CPSF7,DAPK1,DDX58,DGKD,DLG1,DNAH5,DST,EP300,FANCB,GSE1,IL5,KMT2A,MED12,MGA,MR1,MUC16,MYOF,NUP98,PAPLN,PDE4D,PIM1,POLA1,POLE,POLR3B,PTPN11,RASSF5,RBCK1,RTN2,S100A4,SBNO1,SEC14L1,SEMA3E,SHANK3,SHROOM2,SHROOM3,SIPA1L3,SMCO2,SPEN,STAT5B,STRN3,TEX14,TFCP2,TNIK,TP53,TRAF1,TRIM55,TRIO,TRIP12,TTC21B,USP2,VAV3,VWDE,XPO1,ZNF292	62
Digestive System Development and Function,Embryonic Development,Organ Development,Organismal Development,Tissue Development	Development of small intestine	0.000381			EP300,LTB,MAP3K14,NFKB2,RELB,TOX	6
Developmental Disorder,Embryonic Development,Organismal Development,Tissue Morphology	Lack of paraxial mesoderm	0.000381			DDX11,MECOM,MESP2	3
Cell Cycle,Cell Morphology,Cellular Assembly and Organization,DNA Replication, Recombination, and Repair	Morphology of chromosomes	0.000384			BRCA1,EP300,GADD45A,GATA3,HIP1R,KAT6A,KIF14,MYBL1,NCAPD2,PTPN11,RCC1,TP53,WWC1	13
Infectious Diseases	Viral entry by virus	0.000395		-1.744	AKAP13,CCL5,HAVCR1,IFITM3,LIMK1,LY6E,MAP2K3,MYO6,OCLN,VPS53	10
Cellular Movement	Migration of cancer cells	0.000407		1.314	CCL5,CCN3,CEACAM1,CSF3,F3,FRK,HBEGF,ITGA5,MET,MMP13,MMP2,NF2,PARP9,PGF,PLAUR,PRKCE,PTPN11,RHOBTB2,SOCS1,SOX7,SPARC,STAT1,TGFB2,TIAM1	24
Hematological System Development and Function,Hematopoiesis	Development of hematopoietic system	0.000413		-1.032	ADORA1,AKAP13,B2M,BCR,BRCA1,CLEC11A,CSF3,DOT1L,E2F2,EIF2AK2,EP300,EP400,GATA2,GATA3,H3C1,H3C13,H4-16,HIVEP2,IL1A,IL2RB,IL5,ITCH,JAK3,KMT2A,LTB,MECOM,MERTK,MIB1,PIM1,PLSCR1,PTPN11,RBBP5,REL,RELB,RPTOR,SIN3A,SOCS1,SPIB,STAT1,TFR2,TNFRSF9,TP53,VAV3,ZNF10	44
Connective Tissue Disorders,Developmental Disorder,Hereditary Disorder,Organismal Injury and Abnormalities,Skeletal and Muscular Disorders	Marfan syndrome	0.000419			ACTA2,ADRB1,COL1A2,COL3A1,MFAP4,MYH10,STRN3,TRIO	8
Cellular Development,Cellular Growth and Proliferation,Hematological System Development and Function,Hematopoiesis,Lymphoid Tissue Structure and Development,Tissue Development	Hematopoiesis of phagocytes	0.00042		0.192	ADORA1,CSF3,FCGR1A,GATA2,GREM1,IFI16,IL1A,IL2RB,IL31RA,IL5,IRF7,ITGB3,JAK3,LTB,MDK,MR1,NFKB2,REL,RELB,SENP1,SOCS1,SPIB,STAT1,STAT5B,USP18,ZNF10	26
Organismal Injury and Abnormalities	Abnormality of peritoneum	0.000422		-0.44	ABL2,ANGPTL4,ATF3,BIRC3,CFTR,DAPK1,JAK3,LTB,LTB4R,MAP3K14,RELB,TOX	12
Developmental Disorder,Embryonic Development,Organismal Development,Tissue Morphology	Abnormal morphology of embryonic tissue	0.000427			ABL2,AHCTF1,AKAP13,ALDH1A3,ANKRD17,AXIN1,BCLAF1,BPTF,BRCA1,CDC25A,CELSR3,CHM,CUL3,CYP26A1,DDX11,DHX9,DLG1,DNAH11,DOT1L,ENG,EP300,EP400,EPB41L5,F3,FERMT2,FRS2,GATA2,GATA3,HOXA11,HOXC6,ITGA5,ITGB3,JAG2,KAT2A,KAT6A,LRP8,MECOM,MESP2,MIB1,NF2,PIK3CA,PTPN11,RPGRIP1L,RPS6KA3,RPTOR,SBNO1,SENP1,SMURF1,SNX13,SPTBN1,STK35,TFAP2A,TFAP2C,TGFB2,TP53,UBP1,UGCG,USP7,ZFAT	59
Cell Cycle	G1/S phase transition of lung cancer cell lines	0.000427			CDC6,KAT2A,MET,PRKCE,TP53	5
Cancer,Organismal Injury and Abnormalities	Acinar-cell carcinoma	0.000432			AZGP1,DAGLA,DPY19L3,EXOC8,GSTCD,NUP210,PIK3CA,PKP2,POLR3B,PTPRH,RCC1,SMG1,SPEN,TBC1D14,TFAP2C,TP53,UBA7	17
Organismal Injury and Abnormalities,Reproductive System Development and Function,Reproductive System Disease	Abnormal morphology of reproductive system	0.000436			ACP3,ADRA1B,ANTXR2,BRCA1,CABLES1,CFTR,CHM,CYP26A1,DHX58,DLG1,DLX3,HASPIN,HOXA11,HOXC6,IL2RB,IL5,ITGB3,KLF3,LMTK2,LRP8,MAN2A2,MECOM,MERTK,MET,MSH5,MYBL1,NF2,OCLN,PAIP2B,PER2,PLK2,PLTP,PMS2,PRKCE,PTPRF,RFWD3,SETX,SLC12A2,SNX13,SPTBN1,STK35,SULT1E1,TAF4B,TDRD7,TEX12,TEX14,TFAP2C,TFEB,TGFB2,TP53,TRIP12,TSSK6,UBP1,USP2,VPS53,ZFAT	56
Cellular Development,Cellular Growth and Proliferation	Expansion of blood cells	0.000437	Decreased	-2.524	ADORA2A,B2M,CSF3,DGCR8,EPAS1,GATA2,IL18,IL1A,JAK3,KMT2A,MDK,MET,MYBL1,NFKB2,NUP214,NUP98,PIK3CA,PIM1,PLAGL2,REL,RELB,SET,SOCS1,STAT5B,STING1,TNFRSF9,TOX,TP53,UNG	29
Cell Morphology,Cellular Assembly and Organization,Cellular Development,Cellular Function and Maintenance,Cellular Growth and Proliferation,Nervous System Development and Function,Organismal Development,Tissue Development	Neuritogenesis	0.000438	Decreased	-3.316	ABL2,ADGRF1,ADORA2A,AGTPBP1,ANAPC2,ARFGEF1,ARHGAP5,ARHGEF7,ATF3,AXIN1,CAMSAP1,CAMSAP2,CIT,DIAPH1,DLG1,DYNLT1,ENC1,FARP1,FARP2,FNBP1,FNBP1L,GNAL,GPM6A,IL18,ITGB3,KIF3B,LIMK1,LRP8,MAPK8IP2,MET,MPP5,MT2A,MYH10,MYO6,NANOS1,NEFL,NEU3,NF2,NRG1,OGT,OPA1,PHACTR1,PIK3CA,PRKCE,PTPN11,PTPRF,PTPRZ1,RELB,RND1,RPS6KA3,SEMA3E,SHANK3,SHTN1,SLC12A5,SPTBN1,STMN3,TIAM1,TNIK,TP53,TRIO,TRPC6,UBA6,UCN,UGCG,VCX/VCX3A,Z…	66
Gene Expression	Transactivation of RNA	0.000438	Decreased	-2.079	AKAP13,AXIN1,BCR,BRCA1,CCNT1,CEP350,CYP1A1,DDX58,DHX9,E2F2,EIF2AK2,EP300,EPAS1,FOSB,FOSL2,FRK,GADD45A,GATA3,HOXC6,IFI16,IFIH1,IL1A,IRF7,IRF9,KAT2A,KAT6B,KMT2A,MAFB,MAP3K14,MECOM,MITF,MX1,MYBL1,NCOA6,PELP1,PIK3CA,PIM1,PLAGL2,PTGFR,REL,RELB,S100A4,SOCS1,SPIB,STAT1,STAT5B,TAF4B,TFAP2A,TFAP2C,TFCP2,TP53,ZBTB10,ZBTB32,ZHX2,ZNF10	55
Cellular Movement	Cell movement of tumor cells	0.000447		1.157	CCL5,CCN3,CEACAM1,CSF3,F3,FRK,HBEGF,MET,MMP13,MMP2,NF2,PARP9,PGF,PLAUR,PRKCE,PTPN11,RHOBTB2,SOCS1,SOX7,SPARC,STAT1,TGFB2,TIAM1	23
Cellular Function and Maintenance	Function of phagocytes	0.000452		0.555	AIM2,ARHGEF5,BIRC3,CCL5,CSF3,DDX58,F3,FCGR1A,IFIH1,IL18,IL31RA,IL5,ITGB3,JAK3,LIMD1,LTB,LTB4R,MERTK,MYO9B,NFKB2,PIM1,PLAUR,RASSF5,REL,RELB,SELENOK,STAT1,STAT5B,TGFB2,TRAF4	30
Cell Death and Survival	Apoptosis of bone marrow cells	0.000453		0.351	CLEC11A,CSF3,DCN,GADD45A,KMT2A,PIM1,SOCS1,STAT1,STAT5B,TP53	10
Cellular Function and Maintenance,Hematological System Development and Function	Function of myeloid cells	0.000459		0.6	AIM2,BIRC3,CCL5,CSF3,DDX58,DUSP5,F3,FCGR1A,IL18,IL31RA,IL5,ITGB3,LIMD1,LTB4R,MERTK,MYO9B,NFKB2,PLAUR,REL,RELB,S100A4,SELENOK,STAT1,TGFB2	24
Developmental Disorder,Hereditary Disorder,Neurological Disease,Organismal Injury and Abnormalities	Familial mental retardation	0.000465			ADRA1B,ADRB1,AP4E1,ARHGEF7,ARID2,BPTF,BRPF1,COL1A1,DGCR8,DIP2B,EIF2S3,EP300,GPC1,HIVEP2,KANSL1,KAT6A,KAT6B,KCNQ5,KLHL15,KMT2A,MBD5,MED12,NUS1,OGT,OPA1,PEX6,PHF8,POGZ,POMK,RLIM,RPGRIP1L,RPS6KA3,SCAPER,SET,SIN3A,TNIK,TRIO,TRIP12	38
Cellular Movement	Cell movement of breast cancer cell lines	0.000475		0.03	ANKS1A,ARHGAP8/PRR5-ARHGAP8,ATF3,BHLHE41,BRCA1,CCL5,CTSL,CXCL5,DIAPH1,DUSP5,EIF2AK2,EIF3A,ENG,FNBP1L,FOSB,GATA3,GEMIN5,HIC1,HOXA11,ITGB3,LIMK1,MAP3K21,MET,MMP2,MTUS1,MYH10,NF2,NRG1,PAK2,PLAUR,RAB11FIP1,S100A4,SLC16A4,SPARC,TFAP2A,TFAP2C,TIAM1,TP53,TRAF4,VAV3	40
Cancer,Hematological Disease,Immunological Disease,Organismal Injury and Abnormalities	Refractory childhood acute lymphoblastic leukemia	0.000476			ADORA1,ADORA2A,POLA1,POLE	4
Cancer,Organismal Injury and Abnormalities,Respiratory Disease	Acinar lung adenocarcinoma	0.000504			DAGLA,DPY19L3,EXOC8,GSTCD,NUP210,PKP2,POLR3B,PTPRH,RCC1,SMG1,SPEN,TBC1D14,TFAP2C,UBA7	14
Cell Death and Survival	Cell death of breast cell lines	0.000504		0.884	BRCA1,DAPK1,GRHL2,IL1A,ITGA5,MERTK,OAS1,OAS2,OAS3,PIK3CA,PRKCE,RPS6KA3,SERPINB3,TP53	14
Connective Tissue Disorders,Organismal Injury and Abnormalities,Skeletal and Muscular Disorders	Intervertebral disc disorder	0.000518			ADORA1,ADORA2A,ADRA1B,ADRB1,COL9A2,MESP2,PDE4D,SPARC,TP53,TRAF4	10
Organismal Injury and Abnormalities,Respiratory Disease	Dyspnea	0.000525		1.971	ADRA1B,ADRB1,ALDH1A3,BRCA1,DCN,DGKD,DLG1,EPAS1,JAG2,MAFB,MET,NEDD4L,PPARGC1B,SCG5,SIM2,TGFB2,TIMP3,TP53	18
Cellular Movement,Hematological System Development and Function,Immune Cell Trafficking	Cell movement of granulocytes	0.000528		-1.221	ADORA1,ADORA2A,AIM2,CCL28,CCL5,CD48,CEACAM1,CFTR,CLEC11A,CSF3,CXCL5,DEFB103A/DEFB103B,ENG,F3,HAVCR1,IL18,IL1A,IL2RB,IL5,ITGB3,JAK3,LIMK1,LTB4R,MASP2,MDK,MET,MPP1,MYLK3,MYO1F,OCLN,PDE4D,PGF,PLAUR,PLTP,RPTOR,SELENOK,SEMA3E,TGFB2,TNFRSF9,TNIP1,TP53,TRPC6,VAV3	43
Protein Synthesis	Metabolism of protein	0.000534		-1.534	ADORA2A,ADRA1B,ANAPC1,ANAPC2,APLP1,AXIN1,AZGP1,AZIN1,B2M,BCR,C4BPB,CAMK2N1,CAPN7,CASC3,CDK11A,CFTR,CNOT1,CSF3,CTSL,CUL3,CYP1A1,DAPK1,DHX9,DIAPH1,EIF2AK2,EIF2S3,EIF3A,EIF4A2,EIF4B,EIF4ENIF1,EIF5B,ENC1,EP300,FBXO10,FBXO32,FBXW11,GEMIN5,GIGYF2,GNL3L,GPC1,H3C1,H3C13,H4-16,HELZ,HIP1R,IFIT1,IGF2BP2,IL18,IRGM,ITCH,KAT2A,KLHL15,LARP1,MAP2K3,MGAT4A,MMP13,MMP2,MMP24,MYBBP1A,NANOS1,NEDD4,NEDD4L,NF2,NRG1,ODC…	114
Cardiovascular System Development and Function,Cellular Movement	Migration of endothelial cells	0.000535		-0.434	ACACA,ANGPTL4,CCL5,CEACAM1,CSF3,DCN,ELN,ENG,F3,FRS2,GADD45A,GATA3,GPC1,GREM1,ITGB3,KMT2A,MAP2K3,MDK,MET,MMP13,MMP2,NRG1,NUS1,PGF,PIK3CA,PIM1,PLAUR,PRKCE,PTPRZ1,SEMA3E,SP100,SPARC,STARD13,STK35,TGFB2,TIMP3,TJP1,USP18,VAV3,WARS1	40
Cancer,Organismal Injury and Abnormalities,Reproductive System Disease	Ductal breast carcinoma	0.000542			ACTA2,ANXA9,ARFGEF1,BRCA1,CCDC30,CD48,CNNM1,CPAMD8,DST,FERMT2,FNBP1L,GATA3,GREM1,H3C1,JAK3,KMT2A,LY6E,MDC1,MED12,MET,MMP2,MT1G,MT2A,NF2,PAK2,PIK3CA,PLK2,POLE,PTPRF,RAB11FIP1,SMG1,SPEN,STAG2,TLL1,TMC5,TP53,TRIO,VXN,ZNF165	39
Cancer,Organismal Injury and Abnormalities	Blue round small cell tumor	0.000547			ADAMTSL3,AHCTF1,ALDH1A3,B2M,BRCA1,CABLES1,CD48,CDH8,CHERP,CPAMD8,DDX58,DGKD,DOT1L,DST,EP300,EP400,FBXO15,FCGR1A,FGD3,GPRC5D,GSE1,GTF3C4,IFI35,IL2RB,KLF3,KMT2A,KRT7,LRPPRC,LURAP1L,MDC1,MERTK,MET,MGA,MMP24,MTR,MUC16,MYBBP1A,NIPBL,ODC1,OVGP1,PARP10,PHACTR1,PIK3CA,PLK2,POLD4,PRDM15,PREPL,PTPN11,RASSF5,SETX,SMG1,SPEN,STAG2,TJP1,TNIP1,TP53,TRIM35,UBE3C,UBQLN4,UTRN,ZIC5	61
Cellular Growth and Proliferation	Proliferation of bone marrow cell lines	0.000553		-0.621	BCR,CLEC11A,CSF3,GADD45A,HBEGF,IL2RB,IL31RA,JAK3,MDK,MECOM,MERTK,MYBL1,NRG1,PRKCE	14
Cancer,Hematological Disease,Immunological Disease,Organismal Injury and Abnormalities	T acute lymphoblastic leukemia	0.000566			ABL2,ADORA1,ADORA2A,EP300,GATA2,GATA3,IKZF2,JAK3,KMT2A,MGA,NUP98,POLA1,POLE,PPAT,PTPN11,RPTOR,STAG2,STAT5B,TP53,TXLNG,USP7	21
Cellular Development,Cellular Growth and Proliferation,Embryonic Development,Hematological System Development and Function,Hematopoiesis,Lymphoid Tissue Structure and Development,Organ Development,Organismal Development,Tissue Development	Colony formation of bone marrow cells	0.000569		-0.062	BRCA1,CLEC11A,CSF3,EP400,IL5,KMT2A,MECOM,PTPN11,SPIB,TFR2,TP53	11
Hematological System Development and Function,Hematopoiesis,Lymphoid Tissue Structure and Development,Tissue Morphology	Quantity of myeloid progenitor cells	0.000574		-0.885	CSF3,FOSL2,JAK3,KMT2A,PTPN11,RASSF2,REL,TNFRSF9,TP53	9
Digestive System Development and Function	Development of digestive system	0.000583		-1.628	ATF3,COBL,COL1A1,COL3A1,CPLANE1,CYP26A1,DCN,DLG1,DLX3,EP300,FAM20A,FOXP4,GABRE,GATA3,GRIN2D,HIP1R,IL1A,ILDR2,ITGA5,JAG2,KMT2A,LIMK1,LTB,MAP3K14,MET,MMP2,NF2,NFKB2,NIPBL,OGT,PIK3CA,PTPN11,RELB,RPGRIP1L,SIM2,SOCS1,SPEN,SPTBN1,STARD13,STAT5B,TFAP2A,TGFB2,TOX,TP53,WNT10A	45
Hematological System Development and Function,Tissue Morphology	Quantity of blood cells	0.000585	Decreased	-2.134	ACACA,ADORA2A,AIM2,AKAP13,AP1G1,ARHGEF5,ATF3,B2M,BCLAF1,BCR,BIRC3,CCL28,CCL5,CD48,CLEC11A,CSF3,CYP1A1,DCN,DDX58,DIAPH1,DUSP5,E2F2,EIF2AK2,ELF4,EP300,EPAS1,F3,FCGR1A,FOSB,FOSL2,GADD45A,GATA2,GATA3,GREM1,HAVCR1,HBEGF,HIVEP2,IL18,IL1A,IL2RB,IL5,ISG15,ITGB3,JAG2,JAK3,KAT2A,KAT6A,KLF3,KMT2A,LTB,LTB4R,MAP3K14,MDK,MECOM,MERTK,MMP13,MPP1,MR1,MYBL1,MYO9B,NEDD4L,NFKB2,NUP98,PABPC1,PAK2,PER2,PI3,PIK3CA,PIM1…	102
Cell-To-Cell Signaling and Interaction,Cellular Assembly and Organization	Cell-cell contact	0.000586	Decreased	-2.274	ABL2,ADGRF1,ADORA2A,AJUBA,ANXA9,ARHGEF5,ARHGEF7,B2M,CCL5,CEACAM1,CLDN3,CLIP3,CLSTN3,COL4A5,DLG1,DOK7,EPB41L5,ERVW-1,ESRP2,FARP1,GJC1,GPM6A,HIPK2,IFI16,IL18,ITGA5,ITGB3,LY6E,MAFB,MAP3K14,MERTK,MET,MMP2,MYO6,MYOF,NEFL,NEU3,NF2,NMRK2,NPTX2,NRG1,OCLN,OGT,PCDHGA4,PCDHGA8,PGF,PKP2,PRKCE,PTPN11,PTPRF,RPS6KA3,RPTOR,SHANK3,SLC12A2,SLC12A5,SPTAN1,STAT1,STAT5B,TAF4B,TAP1,TIAM1,TIMP3,TJP1,TJP3,TNFAIP2,TNIP1,…	67
Cancer,Cellular Development,Cellular Growth and Proliferation,Organismal Injury and Abnormalities	Development of cancer cells	0.000593		-0.342	ATF3,CEACAM1,DCN,DGCR8,MET,PTPN11,TGFB2,TP53	8
Cell Cycle	Arrest in G1 phase of lymphatic system cells	0.000598			HAVCR1,JAK3,KMT2A,REL,TP53	5
Hematological System Development and Function,Tissue Morphology	Quantity of granulocytes	0.0006		0.389	ADORA2A,ARHGEF5,BCR,CCL28,CLEC11A,CSF3,CYP1A1,DCN,DDX58,DIAPH1,DUSP5,F3,FCGR1A,FOSL2,GADD45A,IL18,IL1A,IL2RB,IL5,JAK3,MDK,MMP13,MPP1,NEDD4L,NFKB2,PI3,PLAC8,PLSCR1,PRKCE,PTPN11,REL,RELB,RPTOR,SEMA3E,STAT5B,TIMP3,TP53	37
Hematological System Development and Function,Hematopoiesis,Tissue Development	Development of bone marrow	0.000617		-0.852	ADORA1,AKAP13,BRCA1,CLEC11A,CSF3,EIF2AK2,EP300,EP400,GATA2,H3C1,H3C13,H4-16,HIVEP2,IL1A,IL2RB,IL5,ITCH,KMT2A,LTB,MECOM,MERTK,PTPN11,RBBP5,RELB,RPTOR,SIN3A,SPIB,TFR2,TNFRSF9,TP53,VAV3	31
Digestive System Development and Function,Organ Morphology,Organismal Development	Morphology of intestine	0.000621			ANGPTL4,BCR,BRCA1,CEACAM1,CFTR,COL3A1,DDX58,DLG1,GCSAM,IL5,JAK3,LTB,MAP3K14,MERTK,MET,NFKB2,PLAGL2,PMS2,SLC12A2,SLC22A4,SLC51A,SPIB,STAT1,TGFB2,TNFRSF9,TNIP1,TOX,TP53,UGCG	29
Hematological System Development and Function,Tissue Morphology	Quantity of leukocytes	0.000627	Decreased	-2.317	ACACA,ADORA2A,AIM2,AKAP13,AP1G1,ARHGEF5,ATF3,B2M,BCLAF1,BCR,BIRC3,CCL28,CCL5,CD48,CLEC11A,CSF3,CYP1A1,DCN,DDX58,DIAPH1,DUSP5,E2F2,ELF4,EP300,F3,FCGR1A,FOSB,FOSL2,GADD45A,GATA2,GATA3,GREM1,HAVCR1,HBEGF,HIVEP2,IL18,IL1A,IL2RB,IL5,ISG15,ITGB3,JAG2,JAK3,KAT2A,KAT6A,KLF3,LTB,LTB4R,MAP3K14,MDK,MERTK,MMP13,MPP1,MR1,MYBL1,MYO9B,NEDD4L,NFKB2,NUP98,PABPC1,PI3,PIK3CA,PIM1,PLAC8,PLSCR1,PRKCE,PSMB8,PSMB9,PTPN…	92
Cell Death and Survival	Cell viability of stomach cancer cell lines	0.000638		-1.782	BCR,EPB41L2,HIC1,HOXC6,HSF4,ITGB3,MCM2,MET,NFKB2,PTPN11,SIN3A,SPEN,TP53	13
Connective Tissue Disorders,Organismal Injury and Abnormalities,Skeletal and Muscular Disorders	Dupuytren contracture	0.00064			ADAMTS16,COL1A1,COL1A2,COL3A1,COL4A5,COL9A2,MMP13,MMP2,STAT1,TIMP3,TIMP4	11
Cancer,Connective Tissue Disorders,Organismal Injury and Abnormalities	Extremity osteosarcoma	0.00066			BPTF,MYH10,NCAPD2,PARP14,PHKA2,PLEKHA6,TP53	7
Cellular Movement,Hematological System Development and Function,Immune Cell Trafficking,Inflammatory Response	Cellular infiltration by phagocytes	0.00066		-1.959	ADORA2A,AGTRAP,AIM2,CFTR,CSF3,CXCL5,DGCR8,HAVCR1,IL18,IL1A,IL5,ITGB3,JAK3,LIMK1,LTB,LTB4R,MASP2,MDK,MET,OPA1,PGF,PLTP,PSMB8,RPS6KA3,RPTOR,SEMA3E,SOCS1,STAT1,STING1,TIMP3,TNFRSF9,TNIP1,TP53,VAV3	34
Digestive System Development and Function,Gastrointestinal Disease,Organ Morphology,Organismal Development,Organismal Injury and Abnormalities	Abnormal morphology of ileum	0.000671			BCR,DDX58,GCSAM,JAK3,LTB,MAP3K14,NFKB2,SPIB,TOX,TP53	10
Cell Morphology,Cellular Assembly and Organization	Morphology of actin cytoskeleton	0.000671			ABL2,ARHGEF5,DIAPH1,LIMK1,MET,NF2,SEMA3E,SPARC,TP53,WWC1	10

## Sheet: Diseases&Funct._HCC827 (TAFs)
¬© 2000-2020 QIAGEN. All rights reserved.
Categories	Diseases or Functions Annotation	p-value	Predicted Activation State	Activation z-score	Molecules	# Molecules
Neurological Disease	Motor dysfunction or movement disorder	2.2e-07	Decreased	-2.996	ADORA1,AEBP1,AGA,ANKRD2,ANO10,APBA2,APLP2,ATP2A1,ATP6AP2,B4GAT1,BRSK2,CACNB3,CD44,CDH11,CDH2,CDKN1B,CLU,COL13A1,COL6A3,CP,CRYAB,DKK3,DRD1,EGR2,FGF8,FZD4,GABBR2,GFAP,GJA1,GRK5,HEPH,HSPA5,IER3,IFIT2,IGFBP5,IL18,IL1R1,JUNB,KCNAB1,MFSD2A,MME,MT1E,MT1M,NCAM1,NPAS3,NRP1,PKIA,PLOD1,PPARA,RHBDF1,SAMD9L,SCARB2,SEMA5A,SERPINE1,SERPINE2,SLC1A4,SLC6A9,SPTBN4,SV2A,THY1,TNFRSF1A,TUBA1A,UCHL1,VCAN,VPS13D,ZNF214	66
Neurological Disease	Movement Disorders	5.83e-07	Decreased	-2.725	ADORA1,AEBP1,AGA,ANKRD2,ANO10,APBA2,APLP2,ATP2A1,ATP6AP2,B4GAT1,BRSK2,CACNB3,CD44,CDH11,CDH2,CDKN1B,CLU,COL13A1,COL6A3,CP,CRYAB,DKK3,DRD1,EGR2,FGF8,FZD4,GABBR2,GFAP,GJA1,GRK5,HEPH,HSPA5,IER3,IFIT2,IGFBP5,IL18,IL1R1,JUNB,KCNAB1,MFSD2A,MME,MT1E,MT1M,NCAM1,NPAS3,NRP1,PKIA,PPARA,RHBDF1,SAMD9L,SCARB2,SEMA5A,SERPINE1,SLC1A4,SLC6A9,SPTBN4,SV2A,THY1,TNFRSF1A,TUBA1A,UCHL1,VCAN,VPS13D,ZNF214	64
Cardiovascular Disease,Developmental Disorder	Congenital anomaly of cardiovascular system	8.38e-07	Decreased	-2.461	ADAM19,ANKRD1,BMP1,CDH2,COL1A2,ECE1,EDNRA,ENG,FGF8,FGFR1,FZD4,GBX2,GJA1,LTBP1,MMP3,MRTFB,MSX1,NPPB,NRP1,PKD2,PRKD1,ROBO1,TIMP3,TRIM21,TUBA1A	25
Cancer,Dermatological Diseases and Conditions,Organismal Injury and Abnormalities	Non-melanoma skin cancer	1.01e-06			ANGPTL2,ANPEP,APBA2,ATP10A,C2CD4D,CD44,CD81,CDH11,CDH2,COL1A2,COL4A1,COL4A2,COL6A3,CR2,CTSL,DNAH2,DZIP1L,FAP,FGFR1,GGN,GGT7,GJA1,GP6,GPX2,HSP90B1,HSPA5,IL17RA,IRF2,KIT,LTBP2,MMP11,MMP14,NID1,PCDHAC1,PDCD1,PDGFRB,PPARA,PRKD1,PXDN,RAET1G,RNF213,ROBO1,SAMD9,SAMD9L,SLC2A3,TUBA1A,VCAN,ZNF114	48
Organismal Injury and Abnormalities,Renal and Urological Disease	Renal lesion	1.32e-06	Decreased	-2.449	ADAM19,ADORA1,AGA,ANPEP,ATP2A1,C1S,CD151,CD44,CD70,CDKN1B,CLU,COL12A1,COL6A3,CSPG4,CTSL,DACT1,DCN,EHD3,ENG,FAP,FBLN5,FGFR1,FN1,GAS6,GJA1,GPX3,HSP90B1,IFIT3,IGFBP5,IL15,IL17RA,IL18,IL1R1,ITGA2B,ITGA5,ITGB3,KIT,LYST,MITF,MME,MMP14,MMP2,MT1E,NPAS3,PAMR1,PCDHGA12,PDCD1,PDGFRB,PECAM1,PIK3C2B,PKD2,S100P,SAMD9,SAMD9L,SERINC2,SERPINB2,SERPINE1,SLC1A4,SPARC,SPHK1,SPTBN4,THY1,TIMP3,TMEM158,TMEM47,TNFRSF1A,…	70
Cancer,Endocrine System Disorders,Gastrointestinal Disease,Organismal Injury and Abnormalities	Pancreatic cancer	7.33e-07			ABCA7,ABCC10,ANPEP,APCDD1L,ARMC2,ATP10A,ATP10D,AZGP1,BAALC,BRSK2,CD44,CDH11,CDH2,CLU,COL12A1,COL1A1,COL1A2,COL4A1,COL5A1,COL6A1,COL6A3,COLEC11,CR2,CSF2RA,CSPG4,CTH,CTSK,DENND6A,DNAH2,DZIP1L,EFEMP2,ENG,EPHB1,FAP,FBLN5,FGFR1,FN1,GIPR,GRAP2,HEPH,HS3ST3A1,HSP90B1,IL17RA,IRF2,ITGA5,ITPR2,ITPRIP,KIT,LTBP1,LTBP2,MAB21L4,MFAP5,MITF,MMP11,MMP14,NID1,NID2,NPTN,NRXN3,NTM,PCDHAC1,PCDHGA12,PCDHGB7,PDCD1,PDCD1…	107
Cancer,Endocrine System Disorders,Organismal Injury and Abnormalities,Reproductive System Disease	Ovarian cancer	6.38e-07			AASS,ADAM19,ADORA1,AEBP1,ALDH1L2,ANPEP,ARHGEF40,ATP10D,ATP8B1,AZGP1,BNC1,C6orf89,CAMK2N2,CD44,CDH2,CDKN1B,CFH,CLDN3,CLU,COL1A2,COL3A1,COL4A1,COL4A2,COL5A1,COL6A2,COL6A3,CP,CSF3,DMBX1,DNAH2,EGR2,FAP,FGF5,FGFR1,FN1,FOXO4,GABBR2,GPX3,HAS2,HSP90B1,INHBA,JUNB,KIT,KRT86,LYST,MANBA,MARVELD1,MFAP5,MFSD2A,MMP1,MMP14,MMP2,MMP3,MSX1,NCAM1,NRP1,NRXN3,NTM,NUCB1,PCDHGA12,PCYOX1,PDCD1,PDCD1LG2,PDGFRB,PDIA4,PHF1…	86
Cancer,Gastrointestinal Disease,Organismal Injury and Abnormalities	Secondary neoplasm of large intestine	2.8e-10			ACTA2,ADIRF,ANGPTL2,ANPEP,CD44,CDH2,CLDN3,CLU,COL4A1,COL4A2,COL6A3,CRABP2,FGFR1,HSP90B1,HTRA1,IGFBP5,KIT,MME,MMP2,MMP3,MSC,MSX1,PCOLCE,PDCD1,PDGFRB,PRRX1,S100P,SERPINE1,TNFRSF11B,WLS	30
Cancer,Gastrointestinal Disease,Organismal Injury and Abnormalities	Oral tumor	6.5e-09			AGAP5 (includes others),APLP2,AS3MT,ATP10A,AUTS2,AZIN2,CD44,CDH13,CDH2,CDKN1B,CNN1,COL1A1,COL4A1,COL4A2,COL5A1,COL6A2,CRYAB,CTCFL,DCN,DPT,FAM171B,FGF8,FGFR1,FN1,GAS6,GRK5,HAS2,HSP90B1,IFIT2,IGFBP5,INHBA,LYST,MEX3C,MFAP4,MFAP5,MFSD2A,MMP10,MMP11,MMP2,N4BP2,NOVA1,NPAS3,NPTN,NRM,NRXN3,OSMR,PCDHAC1,PDCD1,PDGFRB,PLOD1,PRKD1,S100P,SCARB2,SCG5,SERINC2,SERPINE1,SIK2,SIX5,SLC6A9,SLCO2A1,SMG6,SOD3,SP100,SP…	69
Cancer,Gastrointestinal Disease,Organismal Injury and Abnormalities	Gastroesophageal cancer	1.48e-08			ANO10,ANPEP,ANTXR2,APBA2,APCDD1L,ARHGEF40,ARMC2,ATP10D,AUTS2,AZGP1,BAALC,CD44,CDH11,CDH2,CDKN1B,CFH,CLU,COL12A1,COL1A1,COL1A2,COL5A1,COL6A2,COL6A3,COLEC11,CPED1,CR2,CRYBB3,CSF2RA,CSPG4,CYP26A1,DNAH2,EGR2,EHD3,ENG,FAM171B,FAP,FGF8,FGFR1,FN1,FZD4,GGN,GIPR,HAS2,HELT,HSP90B1,HTRA1,IL17RA,IL7R,IRF2,ITPR2,KIT,LYST,MME,MMP3,MXRA8,NAAA,NCAM1,NEDD9,NID1,NID2,NPPB,NRXN3,NUCB1,OSMR,OTUD7A,P4HA2,PCDHB14,PCDH…	99
Cancer,Gastrointestinal Disease,Organismal Injury and Abnormalities	Oral cancer	2.71e-08			AGAP5 (includes others),APLP2,AS3MT,ATP10A,AUTS2,AZIN2,CD44,CDH13,CDH2,CNN1,COL1A1,COL4A1,COL4A2,COL5A1,COL6A2,CRYAB,CTCFL,DCN,DPT,FAM171B,FGFR1,FN1,GAS6,GRK5,HAS2,HSP90B1,IFIT2,IGFBP5,INHBA,LYST,MEX3C,MFAP4,MFAP5,MFSD2A,MMP10,MMP11,MMP2,N4BP2,NOVA1,NPAS3,NPTN,NRM,NRXN3,OSMR,PCDHAC1,PDCD1,PDGFRB,PLOD1,PRKD1,S100P,SCARB2,SCG5,SERINC2,SERPINE1,SIK2,SIX5,SLC6A9,SLCO2A1,SMG6,SOD3,SP100,SP110,TAGLN,TI…	67
Organismal Injury and Abnormalities	Extraintestinal functional disorder	4.04e-07	Decreased	-2.36	ADORA1,ALOX5,ATP2A1,CACNB3,CD44,CLU,COL5A2,CP,DCN,DRD1,EDNRA,FGFR1,FKBP1B,IL1R1,ITGA2B,ITGB3,JUNB,NPAS3,OXTR,PPARA,PRRX1,SCG5,SERINC2,SERPINF1,SLC1A4,SLC6A9,SPARC,SV2A,TIMP3,TNFRSF1A,TUBA1A	31
Cancer,Gastrointestinal Disease,Organismal Injury and Abnormalities	Gastro-esophageal carcinoma	3.15e-07			ANO10,ANPEP,ANTXR2,APBA2,APCDD1L,ARHGEF40,ARMC2,ATP10D,AUTS2,AZGP1,BAALC,CD44,CDH11,CDH2,CFH,CLU,COL12A1,COL1A1,COL1A2,COL5A1,COL6A2,COL6A3,COLEC11,CPED1,CRYBB3,CSF2RA,CSPG4,CYP26A1,DNAH2,EGR2,EHD3,ENG,FAM171B,FGFR1,FN1,GGN,HAS2,HELT,HSP90B1,HTRA1,IL17RA,IL7R,IRF2,ITPR2,KIT,LYST,MMP3,MXRA8,NAAA,NCAM1,NEDD9,NID1,NID2,NPPB,NRXN3,NUCB1,OSMR,OTUD7A,P4HA2,PCDHB14,PCDHGA12,PDCD1,PDGFRB,PI3,PXDN,RAET1G,…	89
Cancer,Gastrointestinal Disease,Organismal Injury and Abnormalities	Oral cavity carcinoma	6.92e-07			AGAP5 (includes others),APLP2,AS3MT,ATP10A,AUTS2,AZIN2,CD44,CDH13,CDH2,CNN1,COL4A1,COL4A2,COL5A1,COL6A2,CTCFL,DCN,DPT,FAM171B,FGFR1,FN1,GAS6,GRK5,HAS2,HSP90B1,IGFBP5,INHBA,LYST,MEX3C,MFAP4,MFAP5,MFSD2A,MMP10,MMP11,MMP2,N4BP2,NOVA1,NPAS3,NPTN,NRM,NRXN3,OSMR,PCDHAC1,PDCD1,PDGFRB,PLOD1,PRKD1,SCG5,SERINC2,SERPINE1,SIK2,SIX5,SLC6A9,SLCO2A1,SMG6,SOD3,SP100,SP110,TAGLN,TIMP3,TLE3,TRIM21,TUBA1A	62
Cancer,Gastrointestinal Disease,Organismal Injury and Abnormalities	Oral squamous cell carcinoma	9.05e-07			AGAP5 (includes others),APLP2,AS3MT,ATP10A,AUTS2,AZIN2,CD44,CDH13,CDH2,CNN1,COL4A1,COL4A2,COL5A1,COL6A2,CTCFL,DCN,DPT,FAM171B,FGFR1,FN1,GAS6,GRK5,HAS2,HSP90B1,IGFBP5,INHBA,LYST,MEX3C,MFAP4,MFAP5,MFSD2A,MMP10,N4BP2,NOVA1,NPAS3,NPTN,NRM,NRXN3,OSMR,PCDHAC1,PDCD1,PDGFRB,PLOD1,PRKD1,SCG5,SERINC2,SERPINE1,SIK2,SIX5,SLC6A9,SLCO2A1,SMG6,SOD3,SP100,SP110,TAGLN,TIMP3,TLE3,TRIM21,TUBA1A	60
Organismal Injury and Abnormalities,Renal and Urological Disease	Structural renal abnormality	7.22e-07	Decreased	-2.273	ADAMTS4,AGA,CD151,CD70,CLMP,CLU,DACT1,DCN,EDNRA,EHD3,GJA1,MMP14,MMP2,MMP3,PDCD1,SCARB2,TIMP3,TNFRSF11B,WNT4	19
Organismal Injury and Abnormalities,Renal and Urological Disease	Hydronephrosis	4.44e-07	Decreased	-2.158	ADAMTS4,AGA,CD70,CLMP,CLU,DACT1,DCN,MMP3,PDCD1,SCARB2,TIMP3,TNFRSF11B	12
Cancer,Hematological Disease,Immunological Disease,Organismal Injury and Abnormalities	Angioimmunoblastic T-cell lymphoma	2.44e-11			ADAM19,CD151,CDH11,CLU,COL6A1,COL6A2,CR2,EFEMP2,ENG,GAS6,GJA1,HSP90B1,ITGA5,MME,MMP1,OSMR,PCOLCE,PDCD1,SERPINF1,THY1,TUBA1A,VWA1	22
Hematological System Development and Function	Bleeding time	1.45e-07		-1.509	ATP2A3,CD151,GP6,GPX3,HSP90B1,ITGA2B,ITGB3,MMP2,MRTFB,NT5E,SELPLG	11
Cardiovascular System Development and Function,Tissue Morphology	Permeability of vascular system	3.72e-07		-1.135	ACTA2,ADORA1,CD151,ENG,GAS6,IL18,MMP10,MMP2,MMP3,NPPB,NT5E,PECAM1,PLAC8,SERPINE1,SERPINF1,SPHK1,SYDE1,TNFRSF1A	18
Cancer,Hematological Disease,Organismal Injury and Abnormalities	Mature lymphocytic neoplasm	2.11e-10			AASS,ADAM19,ALDH1L2,ALOX5,ANPEP,ATP10A,CD151,CD44,CD70,CDH11,CDKN1B,CLU,COL12A1,COL1A1,COL1A2,COL3A1,COL4A1,COL4A2,COL6A1,COL6A2,CPD,CR2,CRYAB,CSF2RA,CTSK,CTSL,DENND6A,DMBX1,DPT,EFEMP2,EGR2,ENG,EXT2,FGFR1,FN1,GAS6,GFAP,GIPR,GJA1,HSP90B1,IFI44,IFIT2,IFIT3,IGFBP5,IL13RA2,IL15,INHBA,ITGA5,ITGB3,ITPR2,KIT,LRP10,MICA,MME,MMP1,MMP2,NCAM1,NEDD9,NID1,NID2,NPAS3,NRP1,OSMR,PCOLCE,PDCD1,PDCD1LG2,PDGFRB,PECA…	90
Cancer,Neurological Disease,Organismal Injury and Abnormalities	Anaplastic glioma	2.37e-09			ADORA1,AZIN2,CD44,CDKN1B,CLU,COL1A1,COL1A2,COL3A1,COL4A1,COL4A2,CSF2RA,CSPG4,ENG,FGF5,FGFR1,FN1,HSP90B1,HSPA5,IGFBP5,IL13RA2,IL15,IL1R1,ITGB3,KCNAB1,KIT,MMP14,NCAM1,P4HA2,PDCD1,PDGFRB,RNF213,SERINC2,TLE3,TNFRSF1A,TSHZ3,TUBA1A,ZNF214	37
Cancer,Neurological Disease,Organismal Injury and Abnormalities	Glioblastoma	3.71e-09			ADORA1,AZIN2,CD44,CDKN1B,CLU,COL1A1,COL1A2,COL3A1,COL4A1,COL4A2,CSF2RA,CSPG4,ENG,FGF5,FGFR1,FN1,HSP90B1,HSPA5,IGFBP5,IL13RA2,IL15,IL1R1,ITGB3,KCNAB1,KIT,MMP14,NCAM1,P4HA2,PDCD1,PDGFRB,SERINC2,TLE3,TNFRSF1A,TSHZ3,TUBA1A,ZNF214	36
Cell Death and Survival,Skeletal and Muscular Disorders	Necrosis of muscle	1e-06		-1.132	ANKRD1,CALR,CAMK2N2,CDKN1B,COL1A1,COL6A1,CRYAB,CSF3,IL18,INHBA,IRF2,ITGB3,KIT,KLF13,MMP10,MMP2,NPPB,PDGFRB,PPARA,S1PR4,SERPINF1,SPHK1,SPTLC2,TGFB1I1,TIMP3,TNFRSF1A,XAF1	27
Cancer,Endocrine System Disorders,Gastrointestinal Disease,Organismal Injury and Abnormalities	Pancreatic tumor	8.61e-08		-1.103	ABCA7,ABCC10,ANPEP,APCDD1L,ARMC2,ATP10A,ATP10D,ATP8B1,AZGP1,BAALC,BRSK2,CD44,CD70,CDH11,CDH2,CDKN1B,CFH,CLU,COL12A1,COL1A1,COL1A2,COL4A1,COL5A1,COL6A1,COL6A3,COLEC11,CR2,CSF2RA,CSPG4,CTH,CTSK,DENND6A,DNAH2,DZIP1L,EFEMP2,ENG,EPHB1,FAP,FBLN5,FGFR1,FN1,GAS6,GIPR,GPC1,GRAP2,HEPH,HS3ST3A1,HSP90B1,IL13RA2,IL17RA,IL18,IRF2,ITGA5,ITGB3,ITPR2,ITPRIP,KIT,LTBP1,LTBP2,MAB21L4,MFAP5,MITF,MMP11,MMP14,NID1,NID2…	123
Cancer,Organismal Injury and Abnormalities	Primary neoplasm	3.51e-11			ADAM19,B3GNT3,CD44,CDKN1B,CLDN3,CLMP,CLU,COL12A1,COL4A1,COL6A2,CP,CR2,CSF2RA,CYP26A1,DPT,ENG,FGFR1,FN1,GFAP,GREM1,HSP90B1,ITGB3,KIT,MME,MMP14,MSC,MSX1,NCAM1,NT5E,OSMR,PDCD1,PDCD1LG2,PDGFRB,PLAC8,S100P,SCG5,SERPINE1,TGFB1I1,TNFRSF1A,TNFRSF9,TUBA1A,VCAN,WNT5A	43
Cancer,Gastrointestinal Disease,Organismal Injury and Abnormalities	Pancreatobiliary tumor	1.76e-07		-1.103	ABCA7,ABCC10,AGA,ANPEP,ANTXR2,APCDD1L,ARMC2,ATP10A,ATP10D,ATP8B1,AZGP1,BAALC,BRSK2,C1S,CD44,CD70,CDH11,CDH2,CDKN1B,CFH,CLU,CNN1,COL12A1,COL1A1,COL1A2,COL4A1,COL5A1,COL6A1,COL6A2,COL6A3,COLEC11,CR2,CSF2RA,CSPG4,CTH,CTSK,DENND6A,DNAH2,DZIP1L,EFEMP2,ENG,EPHB1,FAP,FBLN5,FGFR1,FN1,GAS6,GIPR,GPC1,GRAP2,HEPH,HS3ST3A1,HSP90B1,IL13RA2,IL17RA,IL18,IRF2,ITGA5,ITGB3,ITPR2,ITPRIP,JUNB,KCNAB1,KIT,LTBP1,LTBP2,L…	135
Cell Death and Survival,Organismal Injury and Abnormalities	Cell death of epithelial cells	4.81e-07		-1.101	CALR,CD151,CD44,CDH2,CDKN1B,CEACAM1,CLU,CRYAB,CTH,CYGB,DCN,ENG,FAP,FGFR1,HSPA5,IER3,IGFBP5,IL15,IL18,INHBA,ITGA5,MITF,MMP2,MMP3,PPARA,RNASEL,SERPINE1,SERPINF1,SPARC,SPHK1,TCF4,TGFB1I1,TIMP3,TNFRSF11B,TNFRSF1A,VASN	36
Cancer,Organismal Injury and Abnormalities	Primary solid tumor	7.77e-10			ADAM19,B3GNT3,CD44,CLDN3,CLMP,CLU,COL12A1,COL4A1,COL6A2,CP,CR2,CSF2RA,CYP26A1,DPT,FGFR1,FN1,GFAP,HSP90B1,KIT,MME,MMP14,MSC,MSX1,OSMR,PDCD1,PDCD1LG2,PDGFRB,PLAC8,S100P,SERPINE1,TGFB1I1,TNFRSF1A,TNFRSF9,TUBA1A,VCAN,WNT5A	36
Cancer,Organismal Injury and Abnormalities	Primary tumor	1.03e-09			B3GNT3,CD44,CLDN3,CLMP,CLU,COL12A1,COL4A1,COL6A2,CP,CR2,CSF2RA,CYP26A1,DPT,FGFR1,FN1,GFAP,HSP90B1,KIT,MME,MMP14,MSC,MSX1,NCAM1,OSMR,PDCD1,PDCD1LG2,PDGFRB,PLAC8,S100P,SERPINE1,TGFB1I1,TNFRSF1A,TNFRSF9,TUBA1A,VCAN,WNT5A	36
Cancer,Organismal Injury and Abnormalities	Papillary carcinoma	2.3e-09			ANPEP,ATP8B1,BNC1,CD44,CD70,CFH,CLU,DCN,ENG,FBLN5,FGFR1,FN1,GABBR2,GPX3,HSP90B1,ITGA5,KIT,MFAP5,MMP2,MT1E,PAMR1,PCDHGA12,PDCD1,PDGFRB,SERINC2,SERPINF1,SPHK1,TIMP3,TLE3,TPM2,TUBA1A,WNT5A	32
Cancer,Organismal Injury and Abnormalities	Extrapulmonary squamous cell carcinoma	3.14e-09			ABCA7,ACTA2,ADAM19,ADORA1,AGAP5 (includes others),ALOX5,ANGPTL2,ANPEP,APBA2,APLP2,AS3MT,ATP10A,ATP10D,AUTS2,AZIN2,C2CD4D,CD44,CD70,CD81,CDH11,CDH13,CDH2,CDKN1B,CDYL2,CLU,CNN1,COL12A1,COL1A1,COL1A2,COL4A1,COL4A2,COL5A1,COL6A2,COL6A3,CR2,CSPG4,CTCFL,CTH,CTSL,DCN,DNAH2,DPT,DZIP1L,EMILIN1,FAM171B,FAP,FGFR1,FN1,GAS6,GGN,GGT7,GJA1,GP6,GPX2,GPX3,GRK5,HAS2,HEPH,HS3ST3A1,HSP90B1,HSPA5,HTRA1,IGFBP5,IL17RA,…	141
Cancer,Organismal Injury and Abnormalities	Upper aero-digestive squamous cell carcinoma	1.45e-08			ABCA7,ADAM19,ADORA1,AGAP5 (includes others),ALOX5,APLP2,AS3MT,ATP10A,ATP10D,AUTS2,AZIN2,CD44,CDH11,CDH13,CDH2,CDYL2,CLU,CNN1,COL12A1,COL1A1,COL1A2,COL4A1,COL4A2,COL5A1,COL6A2,CTCFL,CTH,DCN,DPT,FAM171B,FGFR1,FN1,GAS6,GRK5,HAS2,HS3ST3A1,HSP90B1,HTRA1,IGFBP5,IL7R,INHBA,IRF2,LYST,MEX3C,MFAP4,MFAP5,MFSD2A,MMP10,N4BP2,NCAM1,NID1,NOVA1,NPAS3,NPPB,NPTN,NRM,NRP1,NRXN3,OSMR,PCDHAC1,PCDHGB7,PDCD1,PDGFRB,PLO…	88
Organismal Functions	Thermoregulation	5.56e-07		-1.033	ADORA1,ANPEP,APBA2,AZGP1,CSPG4,DRD1,GPX2,GRK5,IL15,INHBA,NPPC,PDCD1,PLAC8,PPARA,SCG5,SERPINE1,TIMP3,TNFRSF1A	18
Cancer,Organismal Injury and Abnormalities	Embryonal tumor	7.13e-08			ADORA1,AZIN2,CD44,CDKN1B,CLU,COL1A1,COL1A2,COL3A1,COL4A1,COL4A2,CSF2RA,CSPG4,ENG,FAP,FGF5,FGFR1,FN1,GFAP,HSP90B1,HSPA5,IGFBP5,IL13RA2,IL15,IL1R1,ITGB3,KCNAB1,KIT,MMP14,NCAM1,NRP1,P4HA2,PCDHAC1,PDCD1,PDGFRB,PIK3C2B,SERINC2,TCF4,TLE3,TNFRSF1A,TNXB,TSHZ3,TUBA1A,WNT5A,ZNF214	44
Gastrointestinal Disease,Inflammatory Disease	Gastroenteritis	1.14e-06		-0.855	ADORA1,ALOX5,CD44,CEACAM1,CFH,COL1A1,COL1A2,CR2,DRD1,FN1,GIPR,GPX2,HSP90B1,IL13RA2,IL17RA,IL18,IL1R1,IL37,ITGB3,KIT,MME,NAAA,NT5E,PDCD1,PPARA,S1PR4,SERINC2,SERPINE1,TMEM173,TNFRSF11B,TNFRSF1A,ZNF214	32
Cancer,Organismal Injury and Abnormalities	Head and neck adenocarcinoma	1.96e-07			CD44,CLU,ENG,FGFR1,FN1,GABBR2,HSP90B1,IGFBP5,ITGA5,KIT,MMP11,MMP2,PDGFRB,RAET1G,SERINC2,SERPINF1,SPHK1,TIMP3,TLE3,WNT5A	20
Cancer,Organismal Injury and Abnormalities	Tubular adenocarcinoma	3.61e-07			ANPEP,CD44,CD70,DCN,FBLN5,FGFR1,GPX3,HSP90B1,KIT,MMP2,MT1E,PAMR1,PCDHGA12,PDGFRB,TIMP3,TPM2,TUBA1A	17
Cancer,Organismal Injury and Abnormalities,Tumor Morphology	Progression of tumor	4.44e-08		-0.839	ANPEP,CD44,CDH2,CDKN1B,CLDN3,CLU,COL1A1,COL1A2,CRYAB,CSF2RA,CTSK,ENG,FGFR1,FOXO4,HSP90B1,IL18,KIT,MMP1,MMP14,NEDD9,NRP1,PDCD1,PDGFRB,SERPINE1,SERPINF1,SPARC,TUBA1A,WNT5A	28
Cancer,Organismal Injury and Abnormalities,Renal and Urological Disease	Chromophobe renal cell carcinoma	5.61e-08			ANPEP,CD44,DCN,FBLN5,FGFR1,GPX3,KIT,MT1E,PAMR1,PCDHGA12,PDGFRB,TIMP3,TPM2	13
Cancer,Organismal Injury and Abnormalities,Reproductive System Disease	Peyronie disease	1.15e-14			COL12A1,COL13A1,COL16A1,COL1A1,COL1A2,COL3A1,COL4A1,COL4A2,COL5A1,COL5A2,COL6A1,COL6A2,COL6A3,COL9A2	14
Cancer,Organismal Injury and Abnormalities,Reproductive System Disease	Uterine cancer	3.33e-09			AASS,ABCC10,ACTG2,ADAM19,AGAP5 (includes others),ALOX5,ANTXR2,APBA2,ATP10A,ATP2A1,ATP2A3,ATP6AP2,ATP8B1,B3GNT3,BNC1,C1S,CD44,CDH11,CDH13,CDH2,CDKN1B,CFH,CLDN3,CLU,CNN1,COL12A1,COL13A1,COL3A1,COL4A2,COL5A1,COL6A3,COLEC11,CP,CPED1,CRABP2,CSPG4,CTH,CTSL,DACT1,DCN,DPP9,DPT,DZIP1L,ECE1,EDNRA,EMILIN1,ENG,EPHB1,EXT2,FAM171B,FAP,FBLN5,FGFR1,FMO3,FN1,GAS6,GFAP,GLT8D2,GPC1,GPR155,GRK5,HAS2,HEPH,HSP90B1,HTR…	148
Cancer,Organismal Injury and Abnormalities,Reproductive System Disease	Endometrial cancer	2.37e-08			AASS,ABCC10,ACTG2,ADAM19,AGAP5 (includes others),ALOX5,ANTXR2,APBA2,ATP10A,ATP2A1,ATP2A3,ATP6AP2,ATP8B1,B3GNT3,BNC1,C1S,CD44,CDH11,CDH13,CDKN1B,CFH,CLDN3,CLU,CNN1,COL12A1,COL13A1,COL3A1,COL4A2,COL5A1,COL6A3,COLEC11,CP,CPED1,CRABP2,CSPG4,CTH,DACT1,DCN,DPP9,DPT,DZIP1L,ECE1,EDNRA,EMILIN1,ENG,EPHB1,EXT2,FAM171B,FAP,FBLN5,FGFR1,FMO3,FN1,GAS6,GFAP,GLT8D2,GPC1,GPR155,GRK5,HAS2,HEPH,HSP90B1,HTRA1,IFI44,I…	137
Cancer,Organismal Injury and Abnormalities,Reproductive System Disease	Invasive breast carcinoma	6.61e-08			ACTA2,ADAMTS4,ANPEP,CD44,CNN1,COL1A2,DACT1,DCN,FAP,FBLN5,FGFR1,FN1,GPX3,GREM1,HSP90B1,IER3,MMP14,MMP2,MT1E,PAMR1,PDCD1,TAGLN,TLE3,TMEM158,TPM2,TUBA1A	26
Gastrointestinal Disease,Inflammatory Disease,Inflammatory Response,Organismal Injury and Abnormalities	Colitis	3.52e-07		-0.734	ADORA1,ALOX5,CD44,CEACAM1,CFH,COL1A1,COL1A2,CR2,FN1,GIPR,GPX2,HSP90B1,IL13RA2,IL18,IL1R1,IL37,ITGB3,KIT,MME,NAAA,NT5E,PDCD1,PPARA,S1PR4,SERINC2,SERPINE1,TMEM173,TNFRSF11B,TNFRSF1A,ZNF214	30
Gastrointestinal Disease,Inflammatory Disease,Inflammatory Response,Organismal Injury and Abnormalities	Enteritis	1.01e-06		-0.695	ADORA1,ALOX5,CD44,CEACAM1,CFH,COL1A1,COL1A2,CR2,DRD1,FN1,GIPR,GPX2,HSP90B1,IL13RA2,IL18,IL1R1,IL37,ITGB3,KIT,MME,NAAA,NT5E,PDCD1,PPARA,S1PR4,SERINC2,SERPINE1,TMEM173,TNFRSF11B,TNFRSF1A,ZNF214	31
Cardiovascular Disease,Neurological Disease,Organismal Injury and Abnormalities	Stroke	6.57e-07		-0.64	CACNB3,CFH,COL4A1,DRD1,ENG,FN1,GJA1,HTRA1,IL18,IL1R1,ITGA2B,ITGB3,NPPB,NRP1,OLR1,PPARA,S100P,SELENOS,SERPINE1,SV2A,TNFRSF1A,TUBA1A	22
Gastrointestinal Disease,Organismal Injury and Abnormalities	Abnormality of large intestine	3.24e-08		-0.623	ADORA1,ALOX5,CD44,CEACAM1,CFH,CLMP,COL1A1,COL1A2,CR2,DACT1,FN1,GIPR,GPX2,HSP90B1,IL13RA2,IL18,IL1R1,IL37,ITGB3,KIT,MME,NAAA,NT5E,PDCD1,PPARA,S1PR4,SERINC2,SERPINE1,SPHK1,TMEM173,TNFRSF11B,TNFRSF1A,WNT5A,ZNF214	34
Cardiovascular Disease,Cardiovascular System Development and Function,Developmental Disorder,Embryonic Development,Organismal Development,Organismal Injury and Abnormalities,Tissue Morphology	Abnormal morphology of fourth pharyngeal arch artery	2.53e-07			ECE1,EDNRA,GBX2,LTBP1,MRTFB,NRP1	6
Cardiovascular Disease,Cardiovascular System Development and Function,Organismal Injury and Abnormalities,Tissue Morphology	Abnormal morphology of subclavian artery	1.55e-07			ECE1,EDNRA,ELN,FGF8,GBX2,PRRX1	6
Cardiovascular Disease,Cardiovascular System Development and Function,Organismal Injury and Abnormalities,Tissue Morphology	Abnormal morphology of branchial arch artery	1.23e-06			ECE1,EDNRA,FGF8,GBX2,LTBP1,MRTFB,NRP1	7
Cardiovascular Disease,Cardiovascular System Development and Function,Organismal Injury and Abnormalities,Tissue Morphology	Abnormal morphology of aorta wall	1.26e-06			COL3A1,ELN,MMP2,PLOD1,TIMP3	5
Cancer,Hematological Disease,Immunological Disease,Organismal Injury and Abnormalities	Non-Hodgkin lymphoma	1.83e-13		-0.579	AASS,ABCA7,ADAM19,ADORA1,ALDH1L2,ALOX5,ANPEP,ATP10A,BCL3,CD151,CD44,CD70,CDH11,CDKN1B,CLU,COL12A1,COL1A1,COL1A2,COL3A1,COL4A1,COL4A2,COL6A1,COL6A2,CR2,CSF2RA,CTSL,DCN,DENND6A,DMBX1,EFEMP2,EGR2,ENG,EXT2,FN1,GAS6,GFAP,GJA1,HSP90B1,IER3,IFI44,IFIT2,IFIT3,IL13RA2,IL15,ITGA5,ITGB3,ITPR2,KIT,MME,MMP1,MMP2,NCAM1,NID1,NID2,NPAS3,OSMR,PCOLCE,PDCD1,PDCD1LG2,PDGFRB,PECAM1,RGS3,RNF213,ROBO1,SAMD9,SELPLG,SEMA…	82
Cell-To-Cell Signaling and Interaction	Adhesion of sarcoma cell lines	2.98e-07		-0.478	DKK3,EMILIN1,FN1,ITGA5,NID1,SERPINE1,VCAN	7
Cancer,Organismal Injury and Abnormalities,Respiratory Disease	Non-small cell lung carcinoma	1.64e-07		-0.378	ABCC10,ACTA2,ADAM19,ADORA1,AGAP5 (includes others),AKR1B10,ANPEP,ANXA9,APLP2,ATP10A,C11orf52,CD44,CDH13,CDKN1B,CEACAM1,CFH,CLDN3,CLU,COL12A1,COL13A1,COL1A1,COL3A1,COL4A1,COL5A1,COL6A3,CPD,CSPG4,CTH,CTTNBP2NL,CYGB,CYP26A1,DCN,DEGS1,DNAH2,DPT,DRD1,EPHB1,FAM171B,FBLN5,FGFR1,FMO3,FN1,FOXO4,GGN,GLT8D2,GPX3,HSP90B1,IFIT3,IL7R,INHBA,ITGA5,KIT,LTBP1,MMP10,MMP14,MMP2,MMP3,MT1E,NAV1,NCAM1,NIBAN3,NID1,NRXN3…	100
Cardiovascular Disease,Neurological Disease,Organismal Injury and Abnormalities	Cerebrovascular dysfunction	2.43e-10		-0.342	ACTA2,CACNB3,CDH2,CFH,CLU,COL4A1,DRD1,EDNRA,ENG,FN1,GJA1,GPX3,HTRA1,IL18,IL1R1,ITGA2B,ITGB3,MMP3,NPPB,NRP1,OLR1,PPARA,RNF213,S100P,SELENOS,SERPINE1,SV2A,TIMP3,TNFRSF11B,TNFRSF1A,TUBA1A	31
Cardiovascular System Development and Function,Tissue Development	Formation of endothelial tube	1.69e-07		-0.342	ANGPTL1,CD44,CEACAM1,COL4A1,COL4A2,CSF3,FN1,MMP14,PECAM1,SERPINE1,SERPINF1	11
Cardiovascular Disease,Organismal Injury and Abnormalities	Abdominal aortic aneurysm	3.71e-07			COL1A1,CTSK,CTSL,ELN,MMP11,MMP14,MMP2,MMP3,TIMP3	9
Cardiovascular System Development and Function	Morphology of vessel component	6.49e-10			CACNB3,COL3A1,EFEMP2,ELN,ENG,FBLN5,FN1,LTBP1,MMP2,MRTFB,OLR1,PI3,PLOD1,TIMP3	14
Cancer,Organismal Injury and Abnormalities,Respiratory Disease	Lung carcinoma	1.23e-07		-0.164	ABCC10,ACTA2,ADAM19,ADORA1,AGAP5 (includes others),AKR1B10,ANGPTL1,ANGPTL2,ANPEP,ANTXR2,ANXA9,APLP2,ARSI,ATP10A,C11orf52,CD44,CDH13,CDKN1B,CEACAM1,CFH,CLDN3,CLU,COL12A1,COL13A1,COL1A1,COL3A1,COL4A1,COL5A1,COL6A3,CPD,CSPG4,CTH,CTTNBP2NL,CYGB,CYP26A1,DCN,DEGS1,DNAH2,DPT,DRD1,EPHB1,FAM171B,FBLN5,FGFR1,FMO3,FN1,FOXO4,GGN,GLT8D2,GPX3,HEPH,HSP90B1,IFIT3,IL7R,INHBA,ITGA5,KIT,LTBP1,MMP1,MMP10,MMP14,MMP2,…	112
Cancer,Hematological Disease,Immunological Disease,Organismal Injury and Abnormalities	B cell cancer	1.03e-06		0	AASS,ABCA7,ADORA1,ALDH1L2,ALOX5,ANPEP,ATP10A,BCL3,CD44,CD70,CDKN1B,COL12A1,COL3A1,COL4A2,COL6A1,COL6A3,CR2,CRYAB,CSF2RA,CTSK,CTSL,DENND6A,DMBX1,DPT,EGR2,EXT2,FGFR1,FN1,GFAP,HSP90B1,IFIT2,IFIT3,IGFBP5,IL15,IL7R,INHBA,ITGB3,ITPR2,KIT,MICA,MME,MMP2,MSC,NCAM1,NID1,NID2,NPAS3,NRP1,OSMR,PDCD1,PDCD1LG2,PDGFRB,PECAM1,PXDN,RGS3,RNF213,ROBO1,SAMD9,SEMA5A,SLC28A3,TNFRSF11B,TNFRSF9,TNXB,TUBA1A,UCHL1,VPS13D,V…	68
Cancer,Hematological Disease,Immunological Disease,Organismal Injury and Abnormalities	B-cell neoplasm	1.25e-06		0	AASS,ABCA7,ADORA1,ALDH1L2,ALOX5,ANPEP,ATP10A,BCL3,CD44,CD70,CDKN1B,COL12A1,COL1A1,COL1A2,COL3A1,COL4A2,COL6A1,COL6A3,CPD,CR2,CRYAB,CSF2RA,CTSK,CTSL,DENND6A,DMBX1,DPT,EGR2,EXT2,FGFR1,FN1,GFAP,HSP90B1,IFIT2,IFIT3,IGFBP5,IL15,IL7R,INHBA,ITGB3,ITPR2,KIT,LRP10,MICA,MME,MMP2,MSC,NCAM1,NEDD9,NID1,NID2,NPAS3,NRP1,OSMR,PDCD1,PDCD1LG2,PDGFRB,PECAM1,PXDN,RGS3,RNF213,ROBO1,SAMD9,SEMA5A,SLC28A3,TNFRSF11B,TNFR…	74
Cancer,Hematological Disease,Immunological Disease,Organismal Injury and Abnormalities	Lymphoma	5.41e-15		0.144	AASS,ABCA7,ADAM19,ADORA1,ALDH1L2,ALOX5,ANPEP,ATP10A,B3GNT3,BCL3,CD151,CD44,CD70,CDH11,CDKN1B,CLMP,CLU,COL12A1,COL1A1,COL1A2,COL3A1,COL4A1,COL4A2,COL6A1,COL6A2,COL6A3,CR2,CSF2RA,CTSL,DCN,DENND6A,DMBX1,DPT,EFEMP2,EGR2,ENG,EXT2,FAP,FGFR1,FN1,GAS6,GFAP,GJA1,HSP90B1,IER3,IFI44,IFIT2,IFIT3,IL13RA2,IL15,IL18,ITGA5,ITGB3,ITPR2,JUNB,KIT,MME,MMP1,MMP2,MSC,NCAM1,NID1,NID2,NPAS3,NT5E,OSMR,PCOLCE,PDCD1,PDCD1L…	96
Connective Tissue Disorders,Inflammatory Disease,Inflammatory Response,Organismal Injury and Abnormalities,Skeletal and Muscular Disorders	Experimentally-induced arthritis	5.87e-10		0.257	AZGP1,BCL3,CD44,CD70,CDH11,CR2,CSF3,FCGRT,FGFR1,FN1,HTRA1,IL15,IL17RA,IL18,IL1R1,LBH,MMP2,MMP3,SPHK1,TCIRG1,TNFRSF1A	21
Cell Morphology	Enlargement of cells	4.86e-07			ADORA1,CACNB3,CDKN1B,COL9A2,CRYAB,CSF3,DACT1,ECE1,ECM1,EDNRA,FN1,GFAP,GJA1,GPX3,IER3,IL18,INHBA,MEX3C,MMP1,MMP3,NPPC,PPARA,RGS3,SERPINE1,TCF4,TNFRSF1A,WNT5A,WNT5B,WNT7A	29
Cell Morphology,Organismal Injury and Abnormalities	Hypertrophy of cells	1.79e-08			ADORA1,CACNB3,CDKN1B,COL9A2,CRYAB,CSF3,DACT1,ECE1,ECM1,EDNRA,FN1,GFAP,GJA1,GPX3,IER3,IL18,INHBA,MEX3C,MMP1,MMP3,NPPC,PPARA,SERPINE1,TCF4,TNFRSF1A,WNT5A,WNT5B,WNT7A	28
Cell Signaling	Cell surface receptor linked signal transduction	3.53e-08			ALOX5,ANGPTL1,COL16A1,COL1A2,COL3A1,CSF2RA,CSF3,CSPG4,ECM1,FN1,GAS6,GP6,HSP90B1,IL13RA2,IL18,IL1R1,ITGA5,ITGB3,JUNB,KIT,MMP1,MMP2,MMP3,NPPB,NPPC,NRP1,OSMR,PRKD1,PRRX1,SERPINE2,THY1,TNFRSF1A	32
Cardiovascular Disease,Organismal Injury and Abnormalities	Atherosclerotic lesion	7e-08		0.308	ALOX5,ANGPTL4,CD44,FN1,IL18,IL1R1,ITGB3,MICA,MMP2,MMP3,OSMR,PDCD1,PECAM1,PLA2G15,PPARA,SERPINE1,TNFRSF11B,TNFRSF1A,VCAN	19
Organismal Injury and Abnormalities	Sclerotic lesion	1.13e-09		0.308	ALOX5,ANGPTL4,CD44,FGFR1,FN1,IL18,IL1R1,ITGB3,KIT,MICA,MMP2,MMP3,OSMR,PDCD1,PDGFRB,PECAM1,PLA2G15,PPARA,SERPINE1,TNFRSF11B,TNFRSF1A,TUBA1A,VCAN	23
Tissue Development	Formation of epithelial tissue	1.14e-08		0.308	ANGPTL1,ANTXR2,CD44,CEACAM1,COL4A1,COL4A2,CSF3,ELN,FN1,MMP14,NID1,PECAM1,SERPINE1,SERPINF1,WNT4	15
Gastrointestinal Disease,Hepatic System Disease,Organismal Injury and Abnormalities	Liver lesion	9.19e-09		0.405	AASS,ABCA7,ABCC10,ACTA2,ACTG2,ADAM19,ADAMTS4,ADORA1,AEBP1,AGA,AGAP5 (includes others),AKR1B10,ALOX5,ANGPTL1,ANO10,ANPEP,ANTXR2,ANXA9,APBA2,APCDD1L,ARHGEF40,ATP10A,ATP10D,ATP2A1,ATP2A3,AUTS2,BAALC,BNC1,C1S,C2CD4D,CD44,CDH11,CDH13,CDH2,CDKN1B,CDYL2,CEACAM1,CFH,CLU,CNN1,COL12A1,COL13A1,COL16A1,COL1A1,COL1A2,COL3A1,COL4A1,COL4A2,COL5A1,COL5A2,COL6A1,COL6A2,COL6A3,COL9A2,CP,CPXM1,CSF2RA,CSPG4,CTCFL,CT…	217
Cancer,Organismal Injury and Abnormalities	Intrathoracic malignant tumor	1.08e-10		0.657	ABCC10,ACTA2,ADAM19,ADORA1,AGAP5 (includes others),AKR1B10,ALOX5,ANGPTL1,ANGPTL2,ANGPTL4,ANPEP,ANTXR2,ANXA9,APLP2,ARSI,ATP10A,C11orf52,CD151,CD44,CDH13,CDKN1B,CEACAM1,CFH,CLDN3,CLU,COL12A1,COL13A1,COL1A1,COL3A1,COL4A1,COL5A1,COL6A3,CPD,CR2,CSF3,CSPG4,CTH,CTTNBP2NL,CYGB,CYP26A1,DCN,DEGS1,DNAH2,DPT,DRD1,EPHB1,FAM171B,FAP,FBLN5,FGF8,FGFR1,FMO3,FN1,FOXO4,GGN,GIPR,GLT8D2,GPX3,HEPH,HSP90B1,HTRA1,IFIT3,…	130
Cellular Movement,Hematological System Development and Function,Immune Cell Trafficking	Transmigration of leukocytes	7.5e-08		0.662	ADORA1,CD44,COL1A1,COL4A1,DCN,ENG,FN1,IL37,ITGB3,JAM2,MMP14,PDCD1LG2,PECAM1,SELPLG,THY1,TIMP3,TNFRSF1A	17
Cancer,Organismal Injury and Abnormalities	Cancer of head	1.26e-10		0.666	ADAMTS4,AGAP5 (includes others),APLP2,AS3MT,ATP10A,AUTS2,AZIN2,CD44,CDH13,CDH2,CDKN1B,CNN1,COL1A1,COL4A1,COL4A2,COL5A1,COL6A2,CRYAB,CSF2RA,CTCFL,DCN,DPT,FAM171B,FGFR1,FN1,GAS6,GFAP,GRK5,HAS2,HSP90B1,IFIT2,IGFBP5,INHBA,KIT,LYST,MEX3C,MFAP4,MFAP5,MFSD2A,MMP1,MMP10,MMP11,MMP2,N4BP2,NCAM1,NOVA1,NPAS3,NPTN,NRM,NRP1,NRXN3,OSMR,PCDHAC1,PDCD1,PDGFRB,PIK3C2B,PKIA,PLOD1,PRKD1,S100P,SCARB2,SCG5,SERINC2,SERP…	80
Connective Tissue Disorders,Organismal Injury and Abnormalities	Damage of connective tissue	2.05e-11		0.71	ADAMTS4,CD70,CLU,CR2,CTSK,FGFR1,FN1,HTRA1,IL15,IL18,IL1R1,MMP1,MMP10,MMP3,SPARC,TIMP3,TNFRSF11B,VCAN	18
Cancer,Organismal Injury and Abnormalities	Sarcoma	2.81e-08		0.792	ABCC10,ACTA2,ANGPTL4,APBA2,ARMC2,ATP6AP2,BNC1,C11orf52,CD44,CDH11,CDKN1B,CFH,CLDN3,CNN1,COL13A1,COL3A1,CRABP2,CSF2RA,CSPG4,CTSL,DCN,ECE1,ENG,EXT2,FAM171B,FAP,FGFR1,FN1,GABBR2,GPC1,HSP90B1,IGFBP5,IL18,IL1R1,KIT,LYST,MITF,MME,MMP1,MMP2,MMP3,NCAM1,NRP1,NT5E,PCDHAC1,PDCD1,PDCD1LG2,PDGFRB,RHBDF1,SAMD9,SCARB2,SEC16B,SEMA5A,SERINC2,SIX5,SLC28A3,SNRPN,SPARC,SPHK1,SPTBN4,TAGLN,TIMP3,TNFRSF1A,TSHZ3,TUBA1A,…	69
Cellular Movement	Transmigration of blood cells	1.39e-08		0.853	ADORA1,CD44,COL1A1,COL4A1,DCN,ENG,FN1,GJA1,IL37,ITGB3,JAM2,MMP14,PDCD1LG2,PECAM1,SELPLG,THY1,TIMP3,TNFRSF1A	18
Cancer,Organismal Injury and Abnormalities	Liquid tumor	6.91e-07		0.943	ADORA1,AGAP5 (includes others),ANGPTL2,ANGPTL4,ANPEP,ARSI,ATP8B1,B3GNT3,BAALC,BCL3,BMP1,CACNB3,CALR,CD44,CDH11,CDKN1B,CLMP,COL12A1,COL16A1,COL1A1,COL1A2,COL5A2,COL6A1,COL6A2,COL6A3,CP,CPD,CR2,CSF2RA,CSF3,CSPG4,CYP26A1,DNAH2,DRD1,ECE1,ENG,EPHB1,FGFR1,GABBR2,GFAP,GFPT2,GIPR,GPX3,GREM1,HSP90B1,HSPA5,IFIT1,IL15,IL1R1,IL7R,ITGA2B,ITGA5,ITGB3,JUNB,KIT,KRT81,KRT86,LRP10,LTBP1,LTBP2,MAB21L4,MANBA,MME,MMP…	106
Connective Tissue Disorders,Organismal Injury and Abnormalities,Skeletal and Muscular Disorders,Tissue Morphology	Damage of cartilage tissue	4.22e-10		0.963	ADAMTS4,CD70,CR2,CTSK,FGFR1,FN1,HTRA1,IL15,IL18,IL1R1,MMP1,MMP10,MMP3,SPARC,TIMP3,TNFRSF11B	16
Cell-To-Cell Signaling and Interaction,Cellular Assembly and Organization	Cell-cell adhesion	2.07e-07		1.016	ANXA9,CD151,CD44,CDH11,CDH13,CDH2,CEACAM1,CLDN3,COL13A1,FN1,IL18,ITGA5,NCAM1,NRXN3,NT5E,OLR1,PECAM1,SCARF2,THY1,TIMP3,TNXB	21
Cardiovascular Disease,Organismal Injury and Abnormalities	Infarction	2.17e-07		1.021	ACTA2,ADORA1,CACNB3,CAMK2N2,CD44,CDKN1B,CLU,COL3A1,CSF3,DRD1,FN1,GP6,GPX3,HTRA1,IL18,IL1R1,ITGA2B,ITGB3,ITPRIP,NPPB,NRP1,NT5E,OLR1,OSMR,PECAM1,PPARA,SERPINE1,TNFRSF11B,TNFRSF1A,TUBA1A	30
Cancer,Organismal Injury and Abnormalities	Connective tissue tumor	3.61e-13		1.051	ABCC10,ACTA2,ANGPTL4,ANTXR2,APBA2,ARMC2,ATP6AP2,BNC1,C11orf52,CD44,CDH11,CDKN1B,CFH,CLDN3,CNN1,COL12A1,COL13A1,COL16A1,COL1A1,COL1A2,COL3A1,COL4A1,COL4A2,COL5A1,COL5A2,COL6A1,COL6A2,COL6A3,COL9A2,CRABP2,CRYAB,CSF2RA,CSPG4,CTSL,DCN,ECE1,ELN,ENG,EXT2,FAM171B,FAP,FGFR1,FN1,GABBR2,GPC1,HSP90B1,IGFBP5,IL18,IL1R1,KIT,LYST,MITF,MME,MMP1,MMP2,MMP3,NCAM1,NRP1,NT5E,PCDHAC1,PDCD1,PDCD1LG2,PDGFRB,RHBDF1,SAMD…	85
Cellular Development,Cellular Growth and Proliferation,Hematological System Development and Function,Lymphoid Tissue Structure and Development	Cell proliferation of T lymphocytes	5.92e-07		1.093	CALR,CD151,CD44,CD70,CD81,CDKN1B,CEACAM1,CSF2RA,CTH,EGR2,EHD3,EPHB1,FKBP1B,FN1,GJA1,GRAP2,HSP90B1,HSPA5,IL13RA2,IL15,IL18,IL1R1,IL7R,INHBA,IRF2,ITGA2B,ITGB3,LTBP1,MICA,NT5E,PDCD1,PDCD1LG2,PECAM1,PRKD1,S1PR4,TCIRG1,THY1,TMEM173,TNFRSF11B,TNFRSF1A,TNFRSF9	41
Cell-To-Cell Signaling and Interaction,Hematological System Development and Function,Immune Cell Trafficking	Adhesion of granulocytes	7.33e-07		1.191	ADORA1,CD44,CFH,CR2,FN1,GAS6,IL18,IL1R1,ITGA5,ITGB3,PECAM1,SELPLG,SPON2,THY1	14
Cell-To-Cell Signaling and Interaction,Tissue Development	Adhesion of extracellular matrix	1.39e-06			CD151,COL13A1,COL3A1,EMILIN1,FBLN5,FN1,ITGA2B,ITGA5,ITGB3,NID1,NID2,TNXB,VCAN	13
Cellular Movement	Migration of myeloid cells	2.59e-08		1.26	ADORA1,CD44,CEACAM1,CFH,COL1A1,COL4A1,CSF3,ENG,FN1,IL17RA,IL18,IL37,ITGB3,MMP14,P2RY6,PECAM1,SELPLG,SERPINE1,SPON2,TIMP3,TNFRSF1A	21
Cell-To-Cell Signaling and Interaction	Activation of connective tissue cells	5e-08		1.262	CD44,CDKN1B,FGFR1,FN1,GJA1,GREM1,IL15,IL17RA,IL18,MMP1,MMP14,NPPB,P2RY6,PDGFRB,SPHK1,TNFRSF11B,WNT4,WNT5A	18
Cell-To-Cell Signaling and Interaction	Adhesion of myeloid cells	9.4e-08		1.276	ADORA1,CD44,CFH,CR2,FN1,GAS6,IL15,IL18,IL1R1,ITGA5,ITGB3,KIT,MITF,PECAM1,SELPLG,SERPINE1,SPON2,THY1	18
Cellular Development,Cellular Growth and Proliferation,Hematological System Development and Function,Lymphoid Tissue Structure and Development	Proliferation of lymphocytes	6.77e-08		1.3	BCL3,CALR,CD151,CD44,CD70,CD81,CDKN1B,CEACAM1,CR2,CSF2RA,CTH,DKK3,EGR2,EHD3,EPHB1,FKBP1B,FN1,GJA1,GRAP2,HSP90B1,HSPA5,IL13RA2,IL15,IL18,IL1R1,IL7R,INHBA,IRF2,ITGA2B,ITGA5,ITGB3,ITPR2,JUNB,KIT,LTBP1,MICA,MMP3,NT5E,PDCD1,PDCD1LG2,PECAM1,PRKD1,S1PR4,TCIRG1,THY1,TMEM173,TNFRSF11B,TNFRSF1A,TNFRSF9,ULBP2	50
Cancer,Organismal Injury and Abnormalities	Growth of malignant tumor	1.06e-07		1.333	AKR1B10,CD151,CD44,CD70,CDKN1B,CEACAM1,CSF2RA,CSF3,CSPG4,DCN,ENG,FBLN5,FGFR1,GAS6,GJA1,GREM1,IGFBP5,IL15,IL18,IL1R1,INHBA,ITGB3,KIT,MME,MMP1,MMP3,NRP1,NT5E,PDCD1,SPHK1,TIMP3,TMEM173,TNFRSF9,WNT5A	34
Cellular Development,Embryonic Development,Organismal Development,Tissue Development	Differentiation of endodermal cells	9.93e-07			COL12A1,COL4A2,COL6A1,FN1,INHBA,ITGA5,MMP14,MMP2	8
Inflammatory Disease,Organismal Injury and Abnormalities,Respiratory Disease	Fibrosis of lung	1.86e-07		1.333	ALOX5,CD44,CDH11,COL3A1,CTSK,EDNRA,FGFR1,HAS2,IL17RA,IL1R1,ITGA5,KIT,MMP1,NPPB,NT5E,PDGFRB,RNASEL,SELPLG,SERPINE1,SPARC,SPHK1,THY1,TNFRSF1A	23
Cell-To-Cell Signaling and Interaction,Tissue Development	Binding of extracellular matrix	1.45e-08		1.342	CD151,CD44,COL13A1,COL3A1,EMILIN1,FBLN5,FN1,ITGA2B,ITGA5,ITGB3,NID1,NID2,SERPINE1,SERPINE2,TNXB,VCAN	16
Cellular Compromise,Inflammatory Response	Degranulation of cells	2.09e-07		1.361	AGA,ALOX5,ANPEP,APLP2,ATP6AP2,CD44,CD81,CEACAM1,CLU,DEFB103A/DEFB103B,DEGS1,ECM1,FN1,GAS6,GRK5,IL13RA2,IL15,ITGA2B,ITGB3,JUNB,KIT,MANBA,MICA,MME,NCAM1,OLR1,PECAM1,PLAC8,RAET1G,S100P,SERPINE1,SLC2A3,SPARC,SPHK1,TCIRG1,TIMP3,TMEM173,TMX3,TNFRSF9,ULBP2	40
Cellular Development,Cellular Growth and Proliferation,Hematological System Development and Function,Lymphoid Tissue Structure and Development	Proliferation of immune cells	1.74e-09		1.369	ANPEP,BCL3,CALR,CD151,CD44,CD70,CD81,CDKN1B,CEACAM1,CR2,CSF2RA,CSF3,CTH,DCN,DKK3,EGR2,EHD3,EPHB1,FKBP1B,FN1,GJA1,GRAP2,HSP90B1,HSPA5,IL13RA2,IL15,IL18,IL1R1,IL37,IL7R,INHBA,IRF2,ITGA2B,ITGA5,ITGB3,ITPR2,JUNB,KIT,LTBP1,MICA,MMP3,MRAS,NT5E,PDCD1,PDCD1LG2,PECAM1,PRKD1,S1PR4,SERPINE1,TCIRG1,THY1,TMEM173,TNFRSF11B,TNFRSF1A,TNFRSF9,ULBP2	56
Cell-To-Cell Signaling and Interaction	Binding of myeloid cells	5.21e-07		1.374	ADORA1,CD44,CFH,CR2,DCN,FN1,GAS6,IL15,IL18,IL1R1,ITGA5,ITGB3,KIT,MITF,PECAM1,SELPLG,SERPINE1,SPON2,THY1,TRPV2	20
Tissue Development	Accumulation of extracellular matrix	2.53e-07		1.387	COL1A1,EDNRA,FN1,GREM1,SERPINE1,THY1	6
Cell-To-Cell Signaling and Interaction,Cellular Movement,Hematological System Development and Function,Immune Cell Trafficking	Recruitment of leukocytes	1.22e-06		1.525	ALOX5,BCL3,CD44,CLU,CR2,CRYAB,CSF3,FGFR1,FN1,GP6,IL15,IL17RA,IL18,IL1R1,IL37,MMP1,MMP2,OLR1,PDCD1,PECAM1,SELPLG,SERPINE1,SPON2,THY1,TNFRSF1A,TNFRSF9	26
Cell-To-Cell Signaling and Interaction,Hematological System Development and Function	Aggregation of blood cells	8.08e-09		1.533	ANGPTL2,ATP2A3,CD151,CD44,CEACAM1,CFH,CLU,CSF3,EPHB1,GAS6,GP6,GPX3,IL15,ITGA2B,ITGB3,MMP1,NRP1,OLR1,PECAM1,SELPLG,SERPINE2,SERPINF1,TNFRSF1A,TNFRSF9	24
Cellular Development,Cellular Growth and Proliferation,Hematological System Development and Function,Lymphoid Tissue Structure and Development	Proliferation of mononuclear leukocytes	1.56e-08		1.594	ANPEP,BCL3,CALR,CD151,CD44,CD70,CD81,CDKN1B,CEACAM1,CR2,CSF2RA,CSF3,CTH,DKK3,EGR2,EHD3,EPHB1,FKBP1B,FN1,GJA1,GRAP2,HSP90B1,HSPA5,IL13RA2,IL15,IL18,IL1R1,IL7R,INHBA,IRF2,ITGA2B,ITGA5,ITGB3,ITPR2,JUNB,KIT,LTBP1,MICA,MMP3,NT5E,PDCD1,PDCD1LG2,PECAM1,PRKD1,S1PR4,TCIRG1,THY1,TMEM173,TNFRSF11B,TNFRSF1A,TNFRSF9,ULBP2	52
Connective Tissue Development and Function,Connective Tissue Disorders,Developmental Disorder,Gastrointestinal Disease,Organ Morphology,Organismal Development,Organismal Injury and Abnormalities,Skeletal and Muscular Disorders,Skeletal and Muscular System Development and Function,Tissue Development	Abnormal morphology of mandible	9.96e-08			CTSK,ECE1,EDNRA,FGF8,GBX2,GJA1,MMP14,MMP2,MSX1,PRRX1,TNFRSF11B,WNT5A	12
Connective Tissue Development and Function,Connective Tissue Disorders,Digestive System Development and Function,Gastrointestinal Disease,Organ Morphology,Organismal Development,Organismal Injury and Abnormalities,Skeletal and Muscular Disorders,Skeletal and Muscular System Development and Function,Tissue Development,Tissue Morphology	Abnormal morphology of alveolar bone	6.06e-07			CTSK,EDNRA,IL17RA,INHBA,MSX1,TNFRSF11B	6
Cancer,Organismal Injury and Abnormalities,Tumor Morphology	Invasion of malignant tumor	1.13e-07		1.599	CD44,CEACAM1,CLU,CSF3,CTSL,ESM1,HSPA5,IGFBP5,ITGA5,MMP2,NEDD9,NRP1,S100P,SERPINE1,SPHK1,VCAN,WNT5A	17
Connective Tissue Disorders,Dermatological Diseases and Conditions,Developmental Disorder,Hereditary Disorder,Metabolic Disease,Organismal Injury and Abnormalities,Skeletal and Muscular Disorders	Ehlers-Danlos syndrome	1.47e-11			ADAMTS4,AEBP1,C1S,COL1A1,COL1A2,COL3A1,COL5A1,COL5A2,PLOD1,PRDM5,TNXB	11
Connective Tissue Disorders,Dermatological Diseases and Conditions,Developmental Disorder,Hereditary Disorder,Metabolic Disease,Organismal Injury and Abnormalities,Skeletal and Muscular Disorders	Autosomal recessive Ehlers-Danlos syndrome	6.47e-09			ADAMTS4,AEBP1,COL1A2,COL3A1,PLOD1,PRDM5,TNXB	7
Connective Tissue Disorders,Dermatological Diseases and Conditions,Developmental Disorder,Hereditary Disorder,Metabolic Disease,Organismal Injury and Abnormalities,Skeletal and Muscular Disorders	Ehlers-Danlos syndrome type VII	6.1e-08			ADAMTS4,COL1A1,COL1A2,COL5A1,COL5A2	5
Connective Tissue Disorders,Dermatological Diseases and Conditions,Developmental Disorder,Hereditary Disorder,Metabolic Disease,Organismal Injury and Abnormalities,Skeletal and Muscular Disorders	Autosomal dominant Ehlers-Danlos syndrome type VII	7.52e-07			COL1A1,COL1A2,COL5A1,COL5A2	4
Connective Tissue Disorders,Developmental Disorder,Hereditary Disorder,Immunological Disease,Organismal Injury and Abnormalities,Skeletal and Muscular Disorders	Ullrich congenital muscular dystrophy	3.17e-09			AKR1B10,COL12A1,COL1A1,COL1A2,COL3A1,COL5A1,COL5A2,COL6A1,COL6A2,COL6A3,DPT,SOD3,TAGLN,TNXB	14
Connective Tissue Disorders,Developmental Disorder,Hereditary Disorder,Immunological Disease,Organismal Injury and Abnormalities,Skeletal and Muscular Disorders	Bethlem myopathy	1.53e-07			COL12A1,COL6A1,COL6A2,COL6A3	4
Connective Tissue Disorders,Developmental Disorder,Hereditary Disorder,Organismal Injury and Abnormalities,Skeletal and Muscular Disorders	Marfan syndrome	4.25e-09			ACTA2,CNN1,COL1A2,COL3A1,COL5A1,COL5A2,LTBP2,MFAP4,TAGLN,TLE3	10
Connective Tissue Disorders,Immunological Disease,Organismal Injury and Abnormalities	Collagen disease	2.15e-10			AKR1B10,CD151,CFH,COL12A1,COL1A1,COL1A2,COL3A1,COL4A1,COL5A1,COL5A2,COL6A1,COL6A2,COL6A3,DPT,SOD3,TAGLN,TNXB	17
Cardiovascular System Development and Function,Tissue Development	Development of endothelial tissue	1.44e-14		1.607	ANGPTL1,ANGPTL4,ANPEP,ANTXR2,CALR,CD151,CD44,CDH13,CDH2,CDKN1B,CEACAM1,COL1A1,COL1A2,COL4A1,COL4A2,ECM1,ENG,FGF5,FGFR1,FN1,GAS6,GJA1,GPC1,HSPA5,IL18,INHBA,ITGB3,KIT,MMP1,MMP14,MMP2,NRP1,PECAM1,PIK3C2B,PPARA,PRKD1,SEMA5A,SERPINE1,SERPINF1,SPARC,THY1,TIMP3,WNT5A	43
Cell-To-Cell Signaling and Interaction,Reproductive System Development and Function	Binding of gonadal cell lines	4.26e-08		1.624	APLP2,CALR,CD44,CDH2,EPHB1,FN1,ITGA2B,ITGA5,ITGB3,MMP2,OLR1,PDGFRB	12
Connective Tissue Disorders,Organismal Injury and Abnormalities,Skeletal and Muscular Disorders	Advanced Dupuytren contracture	1.15e-14			COL12A1,COL13A1,COL16A1,COL1A1,COL1A2,COL3A1,COL4A1,COL4A2,COL5A1,COL5A2,COL6A1,COL6A2,COL6A3,COL9A2	14
Cell-To-Cell Signaling and Interaction	Binding of epithelial cells	4.19e-07		1.627	CD44,CDH13,CEACAM1,CLU,ENG,FN1,IGFBP5,IL1R1,ITGA5,ITGB3,MMP14,NPPB,NPPC,PI3,TIMP3	15
Dermatological Diseases and Conditions,Developmental Disorder,Organismal Injury and Abnormalities	Congenital anomaly of skin	1.78e-10			ADAMTS4,AEBP1,C1S,CD151,COL1A1,COL1A2,COL3A1,COL5A1,COL5A2,EFEMP2,ELN,FBLN5,FGFR1,GJA1,IL1R1,KIT,MMP1,PLOD1,PRDM5,TNXB	20
Dermatological Diseases and Conditions,Organismal Injury and Abnormalities	Burn	5.1e-10			COL12A1,COL13A1,COL16A1,COL1A1,COL1A2,COL3A1,COL4A1,COL4A2,COL5A1,COL5A2,COL6A1,COL6A2,COL6A3,COL9A2,PPARA	15
Developmental Disorder,Hereditary Disorder,Metabolic Disease,Organismal Injury and Abnormalities	Autosomal recessive inborn error of metabolism	1.1e-06			ADAMTS4,AEBP1,BMP1,COL1A2,COL3A1,CP,IL18,IL7R,MITF,P3H1,PLOD1,PRDM5,SERPINF1,SLC17A5,SPARC,TNFRSF11B,TNXB	17
Embryonic Development,Organismal Development,Tissue Development	Development of anlage	1.37e-09			ATP6AP2,CD44,FGF8,FGFR1,FN1,GBX2,INHBA,MITF,PRRX1,ROBO1	10
Cancer,Cellular Movement,Organismal Injury and Abnormalities,Tumor Morphology	Invasion of cancer cells	1.26e-06		1.744	CD44,CEACAM1,CLU,CSF3,CTSL,ESM1,MMP2,NEDD9,NRP1,S100P,SPHK1,VCAN,WNT5A	13
Tissue Morphology	Degradation of extracellular matrix	5.52e-09		1.8	ANPEP,CTSK,CTSL,MMP1,MMP14,MMP2,MMP3,SERPINE1,SOD3,TGFB1I1	10
Cell-To-Cell Signaling and Interaction,Inflammatory Response	Immune response of phagocytes	1.03e-06	Increased	2.008	ABCA7,ANPEP,CALR,CD44,CFH,CH25H,CSF2RA,CSF3,FN1,IL15,IL18,IRF2,ITGB3,MEX3B,SELPLG,SERPINE1,SPHK1,TNFRSF9,TRPV2,WNT5A	20
Cancer,Organismal Injury and Abnormalities	Cancer	6.04e-23	Increased	2.013	A4GALT,AASS,ABCA7,ABCC10,ACTA2,ACTG2,ADAM19,ADAMTS4,ADIRF,ADORA1,AEBP1,AGA,AGAP5 (includes others),AKR1B10,ALDH1L2,ALOX5,ANGPTL1,ANGPTL2,ANGPTL4,ANKRD1,ANKRD2,ANO10,ANPEP,ANTXR2,ANXA9,APBA2,APCDD1L,APLP2,APOL6,ARHGEF40,ARMC2,ARSI,AS3MT,ATP10A,ATP10D,ATP2A1,ATP2A3,ATP6AP2,ATP8B1,AUTS2,AZGP1,AZIN2,B3GNT3,B4GAT1,BAALC,BCL3,BMP1,BNC1,BRSK2,C11orf52,C1S,C2CD4D,C6orf89,CACNB3,CALR,CAMK2N2,CD151,CD44,CD…	435
Cancer,Cellular Development,Cellular Growth and Proliferation,Neurological Disease,Organismal Injury and Abnormalities,Tumor Morphology	Proliferation of glioma cells	6.53e-07	Increased	2.219	CD44,CSF2RA,CSF3,FGFR1,IL18,NRP1,SPHK1,WNT5A	8
Cell-To-Cell Signaling and Interaction	Response of myeloid cells	8.97e-07	Increased	2.224	ABCA7,ANPEP,CALR,CD44,CFH,CH25H,CSF2RA,CSF3,FN1,IL15,IL18,IRF2,ITGB3,MEX3B,SELPLG,SERPINE1,SPHK1,SPON2,TNFRSF9,TRPV2,WNT5A	21
Hereditary Disorder,Neurological Disease,Organismal Injury and Abnormalities	Familial encephalopathy	1.37e-06			ABCA7,ACTA2,AEBP1,ALOX5,ANKRD2,ANO10,ARSI,ATP2A1,ATP6AP2,AUTS2,B4GAT1,CACNB3,CALR,CD44,CDH2,CH25H,CLU,COL4A1,COL4A2,CP,CRYAB,DKK3,DRD1,EGR2,ENG,EXT2,FGF8,FGFR1,GABBR2,GFAP,GJA1,GRK5,HSPA5,HTRA1,IER3,IGFBP5,ITGA2B,ITGB3,JUNB,KCNAB1,MME,MMP1,MT1E,MT1M,NPPB,OLR1,PDGFRB,PKIA,PPARA,RNF213,S100P,SAMD9L,SCARB2,SELENOS,SERPINE2,SLC16A2,SLC1A4,SPOCK1,SV2A,TCF4,TNFRSF1A,TUBA1A,UCHL1,VCAN,VPS13D,ZNF214	66
Hereditary Disorder,Organismal Injury and Abnormalities,Skeletal and Muscular Disorders	Hereditary myopathy	1.79e-07			ACTA2,ACTG2,AKR1B10,ANKRD1,ARSI,ATP2A1,B4GAT1,BMP1,CALR,COL12A1,COL1A1,COL1A2,COL3A1,COL4A1,COL4A2,COL5A1,COL5A2,COL6A1,COL6A2,COL6A3,CRYAB,DPT,EGR2,EMILIN1,ENG,FBLN5,FN1,HSP90B1,HSPA5,MME,SLC16A2,SOD3,SPARC,SPTBN4,TAGLN,TIMP3,TNXB,TPM2,TUBA1A,UCHL1,ZBTB42	41
Cell-To-Cell Signaling and Interaction,Inflammatory Response	Response of phagocytes	1.17e-06	Increased	2.224	ABCA7,ANPEP,CALR,CD44,CFH,CH25H,CSF2RA,CSF3,FN1,IL15,IL18,IRF2,ITGB3,MEX3B,SELPLG,SERPINE1,SPHK1,SPON2,TNFRSF9,TRPV2,WNT5A	21
Metabolic Disease,Organismal Injury and Abnormalities	Amyloidosis	5.12e-07			ABCA7,ACTA2,APLP2,ARMC2,B4GAT1,CH25H,CLU,CNN1,CTSK,DCN,DRD1,FGFR1,GABBR2,GFAP,HSPA5,HTRA1,IGFBP5,KIT,LRP10,MME,MMP1,MMP2,NAV1,OLR1,OSMR,PDGFRB,PPARA,SCG5,SERPINE1,SERPINE2,SLC2A3,SLCO2A1,SPARC,SPTLC2,SV2A,TAGLN,THY1,TIMP3,TSHZ3,UCHL1,ZNF214	41
Connective Tissue Development and Function,Tissue Development	Metabolism by connective tissue	8.93e-07	Increased	2.236	ADAMTS4,HTRA1,MMP1,MMP10,MMP3,PPARA	6
Post-Translational Modification,Protein Degradation,Protein Synthesis	Proteolysis	5.29e-07	Increased	2.298	ADAM19,ADAMTS4,ALOX5,ANPEP,BMP1,C1S,CTSK,CTSL,ECE1,FAP,HTRA1,MME,MMP1,MMP10,MMP11,MMP14,MMP2,MMP3,OLR1,PCOLCE,SERPINE2,SPHK1,TIMP3	23
Neurological Disease	Progressive neurological disorder	1.32e-07			ABCA7,ACTA2,ADIRF,ADORA1,ALOX5,APLP2,ARMC2,B4GAT1,CD44,CH25H,CLU,CNN1,COL1A1,COL1A2,COL3A1,CRYAB,DCN,DRD1,EGR2,ELN,FGFR1,GABBR2,GFAP,HSP90B1,HSPA5,HTRA1,IFIT1,IL18,IL7R,ITGB3,ITPR2,KIT,LRP10,MFSD2A,MME,MMP1,MMP2,NAV1,OLR1,PDGFRB,PPARA,SCARB2,SCG5,SEMA5A,SERPINE1,SERPINE2,SLC1A4,SLC2A3,SLCO2A1,SPARC,SPTLC2,SV2A,TAGLN,THY1,TIMP3,TNFRSF1A,TNXB,TSHZ3,TUBA1A,UCHL1,ZNF214	61
Organ Morphology,Organismal Development,Organismal Injury and Abnormalities,Renal and Urological Disease,Renal and Urological System Development and Function	Abnormal morphology of kidney	4.55e-07			ABCA7,AGA,ANGPTL4,CD151,CFH,CLMP,CLU,COLEC11,CYP26A1,DACT1,DCN,EHD3,GAS6,GJA1,MANBA,MMP14,PDGFRB,PECAM1,PLA2G15,SERPINE1,TIMP3,TNFRSF1A,WNT4	23
Organ Morphology,Organismal Development,Renal and Urological System Development and Function	Morphology of kidney	2.84e-08			ABCA7,AGA,ANGPTL4,CD151,CDKN1B,CFH,CLMP,CLU,CNN1,COLEC11,CYP26A1,DACT1,DCN,EHD3,GAS6,GJA1,GREM1,MANBA,MMP14,PDGFRB,PECAM1,PKD2,PLA2G15,SERPINE1,SPARC,TIMP3,TNFRSF1A,WNT4	28
Cellular Movement	Cell movement of cancer cells	6.88e-07	Increased	2.389	CDH2,CEACAM1,CSF2RA,CSF3,CSPG4,FN1,MMP2,NEDD9,NRP1,S100P,SERPINE1,SPARC,SPHK1,VCAN,WNT5A	15
Protein Degradation,Protein Synthesis	Catabolism of protein	7.12e-12	Increased	2.531	ADAM19,ADAMTS4,ALOX5,ANPEP,AZGP1,AZIN2,BMP1,BRSK2,C1S,CALR,CD81,CDKN1B,CLU,CRYAB,CSPG4,CTSK,CTSL,DACT1,ECE1,FAP,GJA1,HSP90B1,HSPA5,HTRA1,IER3,JUNB,MANBA,MME,MMP1,MMP10,MMP11,MMP14,MMP2,MMP3,MSX1,OLR1,P3H1,PCOLCE,PCYOX1,PPARA,PRKD1,RNF213,SAMD9,SAMD9L,SELENOS,SERPINE1,SERPINE2,SPHK1,SPSB1,TCIRG1,TIMP3,UCHL1,WNT5A	53
Cell-To-Cell Signaling and Interaction,Inflammatory Response	Immune response of leukocytes	8.29e-08	Increased	2.537	ABCA7,ANPEP,CALR,CD44,CD70,CDKN1B,CFH,CH25H,CSF2RA,CSF3,FN1,IL15,IL18,IL7R,IRF2,ITGB3,MEX3B,PDCD1,PDCD1LG2,SELPLG,SERPINE1,SPHK1,THY1,TNFRSF11B,TNFRSF1A,TNFRSF9,TRPV2,WNT5A	28
Cellular Growth and Proliferation	Outgrowth of cells	2.34e-08	Increased	2.551	APBA2,BRSK2,CDH2,CLU,COL1A1,COL1A2,CRYAB,CSF3,FGF5,FGF8,FGFR1,FN1,GFAP,GJA1,GRK5,IL18,ITGB3,KIT,MMP14,MMP2,MRAS,NCAM1,NRP1,PDGFRB,RAB33A,ROBO1,SCD5,SEMA5A,SERPINE1,SERPINE2,SPOCK2,TRPV2,TUBA1A,VCAN,WNT5A	35
Post-Translational Modification,Protein Degradation,Protein Synthesis	Proteolysis of Gelatin	2.57e-08	Increased	2.768	CTSK,CTSL,MMP1,MMP10,MMP11,MMP14,MMP2,MMP3	8
Cell-To-Cell Signaling and Interaction,Hematological System Development and Function	Interaction of leukocytes	5.45e-11	Increased	2.85	ADORA1,CALR,CD151,CD44,CD81,CFH,CLU,CR2,DCN,ENG,FN1,GAS6,GP6,IL15,IL17RA,IL18,IL1R1,IL7R,ITGA5,ITGB3,KIT,MITF,MRAS,NEDD9,NRP1,NT5E,OLR1,PECAM1,SELPLG,SERPINE1,SPON2,THY1,TNFRSF11B,TNFRSF1A,TNFRSF9,TRPV2,ULBP2	37
Organismal Injury and Abnormalities,Renal and Urological Disease,Renal and Urological System Development and Function	Abnormal morphology of urinary system	3.91e-08			ABCA7,ACTG2,AGA,ANGPTL4,CD151,CFH,CLMP,CLU,COLEC11,CYP26A1,DACT1,DCN,EHD3,GAS6,GJA1,MANBA,MMP14,PDGFRB,PECAM1,PLA2G15,SCARB2,SERPINE1,TIMP3,TNFRSF1A,WNT4,WNT5A	26
Organismal Injury and Abnormalities,Tissue Morphology	Hypertrophy of tissue	3.3e-07			ADORA1,CACNB3,CDKN1B,CRYAB,CSF3,DACT1,ECE1,ECM1,EDNRA,EXT2,FN1,IER3,IL18,INHBA,MEX3C,MMP1,MMP3,NPPC,PPARA,SERPINE1,TNFRSF1A,WNT5A,WNT5B,WNT7A	24
Organismal Injury and Abnormalities,Tissue Morphology	Size of lesion	6.67e-07			B4GAT1,CD151,CD44,CDKN1B,CLU,CRYAB,CSF3,ENG,FGF8,GJA1,GP6,GPX3,IL18,IL1R1,ITGB3,ITPRIP,JUNB,KIT,MMP1,MMP3,NRP1,NT5E,OLR1,OSMR,PDCD1,PPARA,SERPINE1,TNFRSF11B,TNFRSF1A	29
Cellular Movement	Migration of carcinoma cell lines	1.58e-09	Increased	2.862	ACTA2,ANPEP,CALR,CD44,CLU,CSF3,EPHB1,FGF8,FN1,GAS6,HAS2,IFIT2,ITGA5,KIT,MITF,MMP1,MMP3,NCAM1,NEDD9,NRP1,PPARA,RAB11FIP4,S100P,SERPINE1,TCF4,WNT5A	26
Cell-To-Cell Signaling and Interaction	Interaction of blood cells	2.95e-11	Increased	2.904	ADORA1,ATP2A3,CALR,CD151,CD44,CD81,CEACAM1,CFH,CLU,CR2,DCN,ENG,FN1,GAS6,GP6,IL15,IL17RA,IL18,IL1R1,IL7R,ITGA2B,ITGA5,ITGB3,KIT,MITF,MRAS,NEDD9,NRP1,NT5E,OLR1,PECAM1,SELPLG,SERPINE1,SPON2,THY1,TNFRSF11B,TNFRSF1A,TNFRSF9,TRPV2,ULBP2	40
Cellular Movement	Homing of blood cells	1.32e-06	Increased	3.001	ADORA1,ALOX5,ANGPTL2,CD151,CD44,CSF2RA,DEFB103A/DEFB103B,EDNRA,ELN,FN1,GJA1,GREM1,IL15,IL18,IL1R1,INHBA,ITGB3,KIT,LYST,NEDD9,NPPB,PPARA,SELPLG,SERPINE1,SPHK1,TCIRG1,TNFRSF1A,TRPV2,WNT5A	29
Renal and Urological System Development and Function	Morphology of urinary system	4.1e-09			ABCA7,ACTG2,AGA,ANGPTL4,CD151,CDKN1B,CFH,CLMP,CLU,CNN1,COLEC11,CYP26A1,DACT1,DCN,EHD3,GAS6,GJA1,GREM1,MANBA,MMP14,PDGFRB,PECAM1,PKD2,PLA2G15,SCARB2,SERPINE1,SPARC,TIMP3,TNFRSF1A,WNT4,WNT5A	31
Skeletal and Muscular Disorders,Skeletal and Muscular System Development and Function	Abnormal morphology of smooth muscle	4.96e-07			CACNB3,CLMP,DRD1,EFEMP2,ELN,ENG,FN1,LTBP1,PLOD1,SCARB2	10
Tissue Development	Disassembly of extracellular matrix	1.52e-10			ADAMTS4,BMP1,CD44,CTSK,CTSL,ENG,FAP,HTRA1,MMP1,MMP10,MMP11,MMP14,MMP2,MMP3	14
Cellular Movement	Migration of cancer cells	4.41e-07	Increased	3.038	CD151,CD44,CDH2,CEACAM1,CSF2RA,CSF3,CSPG4,FN1,ITGA5,MMP14,MMP2,NEDD9,NRP1,S100P,SERPINE1,SPARC,SPHK1,VCAN,WNT5A	19
Tissue Development	Formation of elastic fibers	8.99e-08			EFEMP2,ELN,EMILIN1,FBLN5,MFAP4,TNXB	6
Cancer,Cellular Movement,Organismal Injury and Abnormalities,Tumor Morphology	Invasion of tumor cells	7.53e-08	Increased	3.065	CD44,CEACAM1,CLU,CSF3,CTSL,ESM1,FAP,FN1,MMP1,MMP14,MMP2,MMP3,NEDD9,NRP1,S100P,SPHK1,TRPV2,VCAN,WNT5A	19
Cellular Movement	Migration of tumor cells	1.15e-06	Increased	3.218	CD151,CD44,CDH2,CEACAM1,CSF2RA,CSF3,CSPG4,FN1,ITGA5,MMP14,MMP2,NEDD9,NRP1,S100P,SERPINB2,SERPINE1,SPARC,SPHK1,VCAN,WNT5A	20
Cancer,Cellular Development,Cellular Growth and Proliferation,Organismal Injury and Abnormalities,Tumor Morphology	Proliferation of tumor cells	6.54e-08		1.595	ALOX5,CD151,CD44,CD70,CDKN1B,CEACAM1,CSF2RA,CSF3,CSPG4,DCN,EFEMP2,FAP,FGFR1,GAS6,GJA1,GPC1,GREM1,HSPA5,IGFBP5,IL13RA2,IL15,IL18,IL1R1,INHBA,KIT,MMP14,MMP3,NRP1,PDCD1,SERPINE1,SPHK1,TIMP3,UCHL1,VCAN,WNT5A	35
Cancer,Dermatological Diseases and Conditions,Organismal Injury and Abnormalities	Skin tumor	2.39e-14		1.256	A4GALT,ABCA7,ABCC10,ADAM19,ADAMTS4,ADORA1,AEBP1,AGA,AKR1B10,ALDH1L2,ALOX5,ANGPTL1,ANGPTL2,ANGPTL4,ANO10,ANPEP,ANTXR2,ANXA9,APBA2,APCDD1L,APLP2,APOL6,ARSI,ATP10A,ATP10D,ATP2A1,ATP2A3,ATP8B1,AUTS2,AZGP1,BMP1,BNC1,BRSK2,C1S,C2CD4D,C6orf89,CD151,CD44,CD81,CDH11,CDH13,CDH2,CDYL2,CFH,CH25H,CLDN3,CLU,CNN1,COL12A1,COL13A1,COL16A1,COL1A1,COL1A2,COL3A1,COL4A1,COL4A2,COL5A1,COL5A2,COL6A1,COL6A2,COL6A3,COL9A…	273
Cancer,Dermatological Diseases and Conditions,Organismal Injury and Abnormalities	Skin cancer	9.33e-14		0.695	A4GALT,ABCA7,ABCC10,ADAM19,ADAMTS4,ADORA1,AEBP1,AGA,AKR1B10,ALDH1L2,ALOX5,ANGPTL1,ANGPTL2,ANO10,ANPEP,ANTXR2,ANXA9,APBA2,APCDD1L,APLP2,APOL6,ARSI,ATP10A,ATP10D,ATP2A1,ATP2A3,ATP8B1,AUTS2,AZGP1,BMP1,BNC1,BRSK2,C1S,C2CD4D,C6orf89,CD44,CD81,CDH11,CDH13,CDH2,CDYL2,CFH,CH25H,CLDN3,CLU,CNN1,COL12A1,COL13A1,COL16A1,COL1A1,COL1A2,COL3A1,COL4A1,COL4A2,COL5A1,COL5A2,COL6A1,COL6A2,COL6A3,COL9A2,COLEC11,CP,C…	270
Cancer,Dermatological Diseases and Conditions,Organismal Injury and Abnormalities	Cutaneous melanoma	2.9e-12			A4GALT,ABCA7,ABCC10,ADAM19,ADAMTS4,ADORA1,AEBP1,AGA,AKR1B10,ALDH1L2,ALOX5,ANGPTL1,ANO10,ANPEP,ANTXR2,ANXA9,APBA2,APCDD1L,APLP2,APOL6,ARSI,ATP10A,ATP10D,ATP2A1,ATP2A3,ATP8B1,AUTS2,AZGP1,BMP1,BNC1,BRSK2,C1S,C2CD4D,C6orf89,CD44,CD81,CDH11,CDH13,CDH2,CDYL2,CFH,CH25H,CLU,CNN1,COL12A1,COL13A1,COL16A1,COL1A1,COL1A2,COL3A1,COL4A1,COL4A2,COL5A1,COL5A2,COL6A1,COL6A2,COL6A3,COL9A2,COLEC11,CP,CPD,CPED1,CPXM1…	255
Cancer,Endocrine System Disorders,Organismal Injury and Abnormalities	Nonpituitary endocrine tumor	1.31e-13			ABCA7,ABCC10,ACTA2,ACTG2,ADAM19,ADAMTS4,ADIRF,AEBP1,AGA,AGAP5 (includes others),ALDH1L2,ALOX5,ANGPTL2,ANGPTL4,ANKRD1,ANKRD2,ANO10,ANPEP,ANTXR2,ANXA9,APBA2,APCDD1L,APLP2,ARHGEF40,ARMC2,AS3MT,ATP10A,ATP10D,ATP2A1,ATP2A3,ATP6AP2,ATP8B1,AUTS2,AZGP1,B3GNT3,BAALC,BCL3,BMP1,BRSK2,C1S,C2CD4D,C6orf89,CACNB3,CALR,CAMK2N2,CD44,CD70,CD81,CDH11,CDH13,CDH2,CDKN1B,CDYL2,CELF5,CFH,CH25H,CLDN3,CLMP,CLU,CNN1,COL12…	335
Cancer,Endocrine System Disorders,Organismal Injury and Abnormalities	Endocrine gland tumor	1.64e-13		-1.711	ABCA7,ABCC10,ACTA2,ACTG2,ADAM19,ADAMTS4,ADIRF,AEBP1,AGA,AGAP5 (includes others),ALDH1L2,ALOX5,ANGPTL2,ANGPTL4,ANKRD1,ANKRD2,ANO10,ANPEP,ANTXR2,ANXA9,APBA2,APCDD1L,APLP2,ARHGEF40,ARMC2,AS3MT,ATP10A,ATP10D,ATP2A1,ATP2A3,ATP6AP2,ATP8B1,AUTS2,AZGP1,B3GNT3,BAALC,BCL3,BMP1,BRSK2,C1S,C2CD4D,C6orf89,CACNB3,CALR,CAMK2N2,CD44,CD70,CD81,CDH11,CDH13,CDH2,CDKN1B,CDYL2,CELF5,CFH,CH25H,CLDN3,CLMP,CLU,CNN1,COL12…	336
Cancer,Endocrine System Disorders,Organismal Injury and Abnormalities	Thyroid gland tumor	2.33e-13			ABCA7,ABCC10,ACTA2,ACTG2,ADAM19,ADAMTS4,ADIRF,AEBP1,AGA,AGAP5 (includes others),ALDH1L2,ALOX5,ANGPTL2,ANGPTL4,ANKRD1,ANKRD2,ANO10,ANPEP,ANTXR2,ANXA9,APBA2,APCDD1L,APLP2,ARHGEF40,ARMC2,AS3MT,ATP10A,ATP10D,ATP2A1,ATP2A3,ATP6AP2,ATP8B1,AUTS2,AZGP1,B3GNT3,BAALC,BCL3,BMP1,BRSK2,C1S,C2CD4D,C6orf89,CACNB3,CALR,CAMK2N2,CD44,CD70,CD81,CDH11,CDH13,CDH2,CDKN1B,CDYL2,CELF5,CFH,CH25H,CLDN3,CLMP,CLU,CNN1,COL12…	332
Cancer,Endocrine System Disorders,Organismal Injury and Abnormalities	Thyroid carcinoma	2.47e-13			ABCA7,ABCC10,ACTA2,ACTG2,ADAM19,ADAMTS4,ADIRF,AEBP1,AGA,AGAP5 (includes others),ALDH1L2,ALOX5,ANGPTL2,ANGPTL4,ANKRD1,ANKRD2,ANO10,ANPEP,ANTXR2,ANXA9,APBA2,APCDD1L,APLP2,ARHGEF40,ARMC2,AS3MT,ATP10A,ATP10D,ATP2A1,ATP2A3,ATP6AP2,ATP8B1,AUTS2,AZGP1,B3GNT3,BAALC,BCL3,BMP1,BRSK2,C1S,C2CD4D,C6orf89,CACNB3,CALR,CAMK2N2,CD44,CD70,CD81,CDH11,CDH13,CDH2,CDKN1B,CDYL2,CELF5,CFH,CH25H,CLDN3,CLMP,CLU,CNN1,COL12…	331
Cancer,Endocrine System Disorders,Organismal Injury and Abnormalities,Reproductive System Disease	Gonadal tumor	5.19e-08		-0.187	AASS,ADAM19,ADORA1,AEBP1,ALDH1L2,ANPEP,ARHGEF40,ATP10D,ATP8B1,AZGP1,BNC1,C11orf52,C6orf89,CAMK2N2,CD44,CDH2,CDKN1B,CFH,CLDN3,CLU,COL1A2,COL3A1,COL4A1,COL4A2,COL5A1,COL6A2,COL6A3,CP,CSF3,DMBX1,DNAH2,EGR2,ENG,EPHB1,FAP,FGF5,FGF8,FGFR1,FN1,FOXO4,GABBR2,GPX3,HAS2,HS3ST3A1,HSP90B1,INHBA,JUNB,KIT,KRT86,LYST,MANBA,MARVELD1,MFAP5,MFSD2A,MMP1,MMP14,MMP2,MMP3,MSX1,NCAM1,NRP1,NRXN3,NT5E,NTM,NUCB1,P2RY6,PCDH…	94
Cancer,Endocrine System Disorders,Organismal Injury and Abnormalities,Reproductive System Disease	Ovarian tumor	1.31e-07		-0.126	AASS,ADAM19,ADORA1,AEBP1,ALDH1L2,ANPEP,ARHGEF40,ATP10D,ATP8B1,AZGP1,BNC1,C6orf89,CAMK2N2,CD44,CDH2,CDKN1B,CFH,CLDN3,CLU,COL1A2,COL3A1,COL4A1,COL4A2,COL5A1,COL6A2,COL6A3,CP,CSF3,DMBX1,DNAH2,EGR2,ENG,EPHB1,FAP,FGF5,FGF8,FGFR1,FN1,FOXO4,GABBR2,GPX3,HAS2,HSP90B1,INHBA,JUNB,KIT,KRT86,LYST,MANBA,MARVELD1,MFAP5,MFSD2A,MMP1,MMP14,MMP2,MMP3,MSX1,NCAM1,NRP1,NRXN3,NT5E,NTM,NUCB1,PCDHGA12,PCYOX1,PDCD1,PDCD1L…	90
Cancer,Gastrointestinal Disease,Organismal Injury and Abnormalities	Gastrointestinal tract cancer	1.12e-23		0.152	AASS,ABCA7,ABCC10,ACTA2,ACTG2,ADAM19,ADAMTS4,ADIRF,ADORA1,AEBP1,AGA,AGAP5 (includes others),AKR1B10,ALDH1L2,ALOX5,ANGPTL1,ANGPTL2,ANGPTL4,ANO10,ANPEP,ANTXR2,APBA2,APCDD1L,APLP2,APOL6,ARHGEF40,ARMC2,ARSI,AS3MT,ATP10A,ATP10D,ATP2A1,ATP2A3,ATP6AP2,ATP8B1,AUTS2,AZGP1,AZIN2,B3GNT3,BAALC,BCL3,BMP1,BNC1,BRSK2,C1S,C2CD4D,C6orf89,CACNB3,CALR,CD44,CD70,CD81,CDH11,CDH13,CDH2,CDKN1B,CDYL2,CEACAM1,CFH,CH25H,C…	374
Cancer,Gastrointestinal Disease,Organismal Injury and Abnormalities	Gastrointestinal tumor	1.19e-23		-0.155	AASS,ABCA7,ABCC10,ACTA2,ACTG2,ADAM19,ADAMTS4,ADIRF,ADORA1,AEBP1,AGA,AGAP5 (includes others),AKR1B10,ALDH1L2,ALOX5,ANGPTL1,ANGPTL2,ANGPTL4,ANO10,ANPEP,ANTXR2,APBA2,APCDD1L,APLP2,APOL6,ARHGEF40,ARMC2,ARSI,AS3MT,ATP10A,ATP10D,ATP2A1,ATP2A3,ATP6AP2,ATP8B1,AUTS2,AZGP1,AZIN2,B3GNT3,BAALC,BCL3,BMP1,BNC1,BRSK2,C1S,C2CD4D,C6orf89,CACNB3,CALR,CD44,CD70,CD81,CDH11,CDH13,CDH2,CDKN1B,CDYL2,CEACAM1,CFH,CH25H,C…	375
Cancer,Gastrointestinal Disease,Organismal Injury and Abnormalities	Gastrointestinal carcinoma	2.49e-22			AASS,ABCA7,ABCC10,ACTA2,ACTG2,ADAM19,ADAMTS4,ADORA1,AEBP1,AGA,AGAP5 (includes others),AKR1B10,ALDH1L2,ALOX5,ANGPTL1,ANGPTL2,ANGPTL4,ANO10,ANPEP,ANTXR2,APBA2,APCDD1L,APLP2,APOL6,ARHGEF40,ARMC2,ARSI,AS3MT,ATP10A,ATP10D,ATP2A1,ATP2A3,ATP6AP2,ATP8B1,AUTS2,AZGP1,AZIN2,B3GNT3,BAALC,BCL3,BMP1,BNC1,BRSK2,C1S,C2CD4D,C6orf89,CACNB3,CD44,CD70,CD81,CDH11,CDH13,CDH2,CDKN1B,CDYL2,CEACAM1,CFH,CH25H,CLMP,CLU,CNN…	361
Cancer,Gastrointestinal Disease,Organismal Injury and Abnormalities	Digestive system cancer	2.88e-22		-0.741	AASS,ABCA7,ABCC10,ACTA2,ACTG2,ADAM19,ADAMTS4,ADIRF,ADORA1,AEBP1,AGA,AGAP5 (includes others),AKR1B10,ALDH1L2,ALOX5,ANGPTL1,ANGPTL2,ANGPTL4,ANO10,ANPEP,ANTXR2,ANXA9,APBA2,APCDD1L,APLP2,APOL6,ARHGEF40,ARMC2,ARSI,AS3MT,ATP10A,ATP10D,ATP2A1,ATP2A3,ATP6AP2,ATP8B1,AUTS2,AZGP1,AZIN2,B3GNT3,BAALC,BCL3,BMP1,BNC1,BRSK2,C1S,C2CD4D,C6orf89,CACNB3,CALR,CD44,CD70,CD81,CDH11,CDH13,CDH2,CDKN1B,CDYL2,CEACAM1,CFH,C…	393
Cancer,Gastrointestinal Disease,Organismal Injury and Abnormalities	Digestive organ tumor	2.95e-22		-0.505	AASS,ABCA7,ABCC10,ACTA2,ACTG2,ADAM19,ADAMTS4,ADIRF,ADORA1,AEBP1,AGA,AGAP5 (includes others),AKR1B10,ALDH1L2,ALOX5,ANGPTL1,ANGPTL2,ANGPTL4,ANO10,ANPEP,ANTXR2,ANXA9,APBA2,APCDD1L,APLP2,APOL6,ARHGEF40,ARMC2,ARSI,AS3MT,ATP10A,ATP10D,ATP2A1,ATP2A3,ATP6AP2,ATP8B1,AUTS2,AZGP1,AZIN2,B3GNT3,BAALC,BCL3,BMP1,BNC1,BRSK2,C1S,C2CD4D,C6orf89,CACNB3,CALR,CD44,CD70,CD81,CDH11,CDH13,CDH2,CDKN1B,CDYL2,CEACAM1,CFH,C…	398
Cancer,Gastrointestinal Disease,Organismal Injury and Abnormalities	Large intestine adenocarcinoma	3.05e-22			AASS,ABCA7,ABCC10,ACTA2,ACTG2,ADAM19,ADAMTS4,ADORA1,AEBP1,AGA,AGAP5 (includes others),AKR1B10,ALDH1L2,ALOX5,ANGPTL1,ANGPTL2,ANGPTL4,ANO10,ANPEP,ANTXR2,APBA2,APCDD1L,APLP2,APOL6,ARHGEF40,ARMC2,ARSI,ATP10A,ATP10D,ATP2A1,ATP2A3,ATP6AP2,ATP8B1,AUTS2,AZGP1,B3GNT3,BCL3,BMP1,BNC1,BRSK2,C1S,C2CD4D,C6orf89,CACNB3,CD44,CD70,CD81,CDH11,CDH13,CDH2,CDKN1B,CDYL2,CEACAM1,CFH,CH25H,CLMP,CLU,COL12A1,COL16A1,COL1A…	347
Cancer,Gastrointestinal Disease,Organismal Injury and Abnormalities	Gastrointestinal adenocarcinoma	6.84e-22			AASS,ABCA7,ABCC10,ACTA2,ACTG2,ADAM19,ADAMTS4,ADORA1,AEBP1,AGA,AGAP5 (includes others),AKR1B10,ALDH1L2,ALOX5,ANGPTL1,ANGPTL2,ANGPTL4,ANO10,ANPEP,ANTXR2,APBA2,APCDD1L,APLP2,APOL6,ARHGEF40,ARMC2,ARSI,ATP10A,ATP10D,ATP2A1,ATP2A3,ATP6AP2,ATP8B1,AUTS2,AZGP1,B3GNT3,BAALC,BCL3,BMP1,BNC1,BRSK2,C1S,C2CD4D,C6orf89,CACNB3,CD44,CD70,CD81,CDH11,CDH13,CDH2,CDKN1B,CDYL2,CEACAM1,CFH,CH25H,CLMP,CLU,COL12A1,COL16A1…	352
Cancer,Gastrointestinal Disease,Organismal Injury and Abnormalities	Intestinal tumor	4.02e-21		-0.305	AASS,ABCA7,ABCC10,ACTA2,ACTG2,ADAM19,ADAMTS4,ADIRF,ADORA1,AEBP1,AGA,AGAP5 (includes others),AKR1B10,ALDH1L2,ALOX5,ANGPTL1,ANGPTL2,ANGPTL4,ANO10,ANPEP,ANTXR2,APBA2,APCDD1L,APLP2,APOL6,ARHGEF40,ARMC2,ARSI,ATP10A,ATP10D,ATP2A1,ATP2A3,ATP6AP2,ATP8B1,AUTS2,AZGP1,B3GNT3,BCL3,BMP1,BNC1,BRSK2,C1S,C2CD4D,C6orf89,CACNB3,CALR,CD44,CD70,CD81,CDH11,CDH13,CDH2,CDKN1B,CDYL2,CEACAM1,CFH,CH25H,CLDN3,CLMP,CLU,CNN1…	359
Cancer,Gastrointestinal Disease,Organismal Injury and Abnormalities	Large intestine neoplasm	8.71e-21			AASS,ABCA7,ABCC10,ACTA2,ACTG2,ADAM19,ADAMTS4,ADIRF,ADORA1,AEBP1,AGA,AGAP5 (includes others),AKR1B10,ALDH1L2,ALOX5,ANGPTL1,ANGPTL2,ANGPTL4,ANO10,ANPEP,ANTXR2,APBA2,APCDD1L,APLP2,APOL6,ARHGEF40,ARMC2,ARSI,ATP10A,ATP10D,ATP2A1,ATP2A3,ATP6AP2,ATP8B1,AUTS2,AZGP1,B3GNT3,BCL3,BMP1,BNC1,BRSK2,C1S,C2CD4D,C6orf89,CACNB3,CALR,CD44,CD70,CD81,CDH11,CDH13,CDH2,CDKN1B,CDYL2,CEACAM1,CFH,CH25H,CLDN3,CLMP,CLU,CNN1…	358
Cancer,Gastrointestinal Disease,Organismal Injury and Abnormalities	Malignant neoplasm of large intestine	9.26e-21			AASS,ABCA7,ABCC10,ACTA2,ACTG2,ADAM19,ADAMTS4,ADIRF,ADORA1,AEBP1,AGA,AGAP5 (includes others),AKR1B10,ALDH1L2,ALOX5,ANGPTL1,ANGPTL2,ANGPTL4,ANO10,ANPEP,ANTXR2,APBA2,APCDD1L,APLP2,APOL6,ARHGEF40,ARMC2,ARSI,ATP10A,ATP10D,ATP2A1,ATP2A3,ATP6AP2,ATP8B1,AUTS2,AZGP1,B3GNT3,BCL3,BMP1,BNC1,BRSK2,C1S,C2CD4D,C6orf89,CACNB3,CALR,CD44,CD70,CD81,CDH11,CDH13,CDH2,CDKN1B,CDYL2,CEACAM1,CFH,CH25H,CLDN3,CLMP,CLU,COL1…	357
Cancer,Gastrointestinal Disease,Organismal Injury and Abnormalities	Upper gastrointestinal tract cancer	7.27e-14			ABCA7,AGAP5 (includes others),ALDH1L2,ANO10,ANPEP,ANTXR2,APBA2,APCDD1L,APLP2,ARHGEF40,ARMC2,AS3MT,ATP10A,ATP10D,ATP6AP2,AUTS2,AZGP1,AZIN2,BAALC,CD44,CDH11,CDH13,CDH2,CDKN1B,CFH,CLU,CNN1,COL12A1,COL1A1,COL1A2,COL4A1,COL4A2,COL5A1,COL6A2,COL6A3,COLEC11,CPED1,CR2,CRYAB,CRYBB3,CSF2RA,CSPG4,CTCFL,CYP26A1,DCN,DNAH2,DPT,DZIP1L,EGR2,EHD3,ENG,FAM171B,FAP,FGF8,FGFR1,FN1,FZD4,GAS6,GGN,GIPR,GRK5,HAS2,HELT,HS…	153
Cancer,Gastrointestinal Disease,Organismal Injury and Abnormalities	Upper gastrointestinal carcinoma	1.4e-11			ABCA7,AGAP5 (includes others),ALDH1L2,ANO10,ANPEP,ANTXR2,APBA2,APCDD1L,APLP2,ARHGEF40,ARMC2,AS3MT,ATP10A,ATP10D,ATP6AP2,AUTS2,AZGP1,AZIN2,BAALC,CD44,CDH11,CDH13,CDH2,CFH,CLU,CNN1,COL12A1,COL1A1,COL1A2,COL4A1,COL4A2,COL5A1,COL6A2,COL6A3,COLEC11,CPED1,CRYAB,CRYBB3,CSF2RA,CSPG4,CTCFL,CYP26A1,DCN,DNAH2,DPT,DZIP1L,EGR2,EHD3,ENG,FAM171B,FGFR1,FN1,GAS6,GGN,GRK5,HAS2,HELT,HSP90B1,HTRA1,IGFBP5,IL17RA,IL7R…	141
Cancer,Gastrointestinal Disease,Organismal Injury and Abnormalities	Colorectal cancer	9.18e-11			AASS,ABCC10,ACTA2,ADAM19,ADAMTS4,ADIRF,ADORA1,AEBP1,AGAP5 (includes others),AKR1B10,ALDH1L2,ALOX5,ANGPTL2,ANGPTL4,ANO10,ANPEP,ANTXR2,APBA2,APCDD1L,APLP2,ARHGEF40,ARSI,ATP10A,ATP10D,ATP2A1,ATP2A3,ATP6AP2,ATP8B1,AUTS2,B3GNT3,BCL3,BRSK2,C6orf89,CACNB3,CALR,CD44,CDH13,CDH2,CDKN1B,CDYL2,CEACAM1,CFH,CLDN3,CLU,COL12A1,COL1A1,COL1A2,COL3A1,COL4A1,COL4A2,COL5A1,COL5A2,COL6A1,COL6A2,COL6A3,COL9A2,CPD,CPED1…	216
Cancer,Gastrointestinal Disease,Organismal Injury and Abnormalities	Colorectal tumor	1.63e-10			AASS,ABCC10,ACTA2,ADAM19,ADAMTS4,ADIRF,ADORA1,AEBP1,AGAP5 (includes others),AKR1B10,ALDH1L2,ALOX5,ANGPTL2,ANGPTL4,ANO10,ANPEP,ANTXR2,APBA2,APCDD1L,APLP2,ARHGEF40,ARSI,ATP10A,ATP10D,ATP2A1,ATP2A3,ATP6AP2,ATP8B1,AUTS2,B3GNT3,BCL3,BRSK2,C6orf89,CACNB3,CALR,CD44,CDH13,CDH2,CDKN1B,CDYL2,CEACAM1,CFH,CLDN3,CLU,CNN1,COL12A1,COL1A1,COL1A2,COL3A1,COL4A1,COL4A2,COL5A1,COL5A2,COL6A1,COL6A2,COL6A3,COL9A2,CPD,…	218
Cancer,Gastrointestinal Disease,Organismal Injury and Abnormalities	Secondary neoplasm of digestive system	2.47e-10			ACTA2,ADIRF,ANGPTL2,ANPEP,CD44,CDH2,CDKN1B,CLDN3,CLU,COL4A1,COL4A2,COL6A3,CRABP2,FGFR1,HSP90B1,HTRA1,IGFBP5,IL15,KIT,MME,MMP2,MMP3,MSC,MSX1,PCOLCE,PDCD1,PDGFRB,PRRX1,S100P,SERPINE1,TNFRSF11B,WLS	32
Cancer,Gastrointestinal Disease,Organismal Injury and Abnormalities	Development of digestive organ tumor	5.45e-10		-0.083	AASS,ABCC10,ADAM19,ADAMTS4,ADORA1,AEBP1,AGAP5 (includes others),AKR1B10,ALDH1L2,ALOX5,ANGPTL4,ANO10,ANPEP,ANTXR2,APBA2,APCDD1L,APLP2,ARHGEF40,ARMC2,ARSI,ATP10A,ATP10D,ATP2A1,ATP2A3,ATP6AP2,ATP8B1,AUTS2,AZGP1,B3GNT3,BCL3,BRSK2,C6orf89,CACNB3,CD44,CDH11,CDH13,CDH2,CDKN1B,CDYL2,CEACAM1,CFH,CLU,COL12A1,COL1A1,COL1A2,COL4A2,COL5A1,COL5A2,COL6A1,COL6A2,COL6A3,COL9A2,CPD,CPED1,CPXM1,CR2,CRYBA2,CRYBB3,CS…	212
Cancer,Gastrointestinal Disease,Organismal Injury and Abnormalities	Metastatic gastrointestinal tract cancer	8.22e-10			ACTA2,ADIRF,ANGPTL2,ANPEP,CD44,CDH2,CLDN3,CLU,COL4A1,COL4A2,COL6A3,CRABP2,FGFR1,HSP90B1,HTRA1,IGFBP5,KIT,MME,MMP2,MMP3,MSC,MSX1,PCOLCE,PDCD1,PDGFRB,PRRX1,S100P,SERPINE1,TNFRSF11B,TUBA1A,WLS	31
Cancer,Gastrointestinal Disease,Organismal Injury and Abnormalities	Metastatic colorectal cancer	1.02e-09			ACTA2,ADIRF,ANGPTL2,ANPEP,CD44,CDH2,CLDN3,CLU,COL4A1,COL4A2,COL6A3,CRABP2,FGFR1,HTRA1,IGFBP5,KIT,MME,MMP2,MMP3,MSC,MSX1,PCOLCE,PDCD1,PDGFRB,PRRX1,S100P,SERPINE1,TNFRSF11B,WLS	29
Cancer,Gastrointestinal Disease,Organismal Injury and Abnormalities	Advanced malignant gastrointestinal neoplasm	1.51e-09			ACTA2,ADIRF,ANGPTL2,ANPEP,CD44,CDH2,CLDN3,CLU,COL4A1,COL4A2,COL6A3,CRABP2,FGFR1,HSP90B1,HTRA1,IGFBP5,KIT,MME,MMP2,MMP3,MSC,MSX1,PCOLCE,PDCD1,PDGFRB,PRRX1,S100P,SERPINE1,TNFRSF11B,TUBA1A,WLS	31
Cancer,Gastrointestinal Disease,Organismal Injury and Abnormalities	Colorectal adenocarcinoma	2.87e-08			AASS,ABCC10,ADAM19,ADAMTS4,ADORA1,AEBP1,AGAP5 (includes others),AKR1B10,ALDH1L2,ALOX5,ANGPTL4,ANO10,ANPEP,ANTXR2,APBA2,APCDD1L,APLP2,ARHGEF40,ARSI,ATP10A,ATP10D,ATP2A1,ATP2A3,ATP6AP2,ATP8B1,AUTS2,B3GNT3,BCL3,BRSK2,C6orf89,CACNB3,CD44,CDH13,CDH2,CDKN1B,CDYL2,CFH,CLU,COL12A1,COL4A2,COL5A1,COL5A2,COL6A1,COL6A3,COL9A2,CPD,CPED1,CPXM1,CR2,CRYBA2,CSF2RA,CSPG4,CTCFL,CTTNBP2NL,DCN,DNAH2,ECE1,ECM1,EGR2,EM…	181
Cancer,Gastrointestinal Disease,Organismal Injury and Abnormalities	Colon tumor	5.5e-08			ABCC10,ADAM19,ADAMTS4,ADORA1,AEBP1,AGAP5 (includes others),AKR1B10,ALDH1L2,ALOX5,ANGPTL4,ANO10,ANPEP,ANTXR2,APBA2,APCDD1L,APLP2,ARHGEF40,ARSI,ATP10A,ATP10D,ATP2A1,ATP2A3,ATP8B1,AUTS2,B3GNT3,BCL3,BRSK2,C6orf89,CACNB3,CD44,CDH13,CDH2,CDKN1B,CDYL2,CEACAM1,CFH,CLDN3,CLU,CNN1,COL12A1,COL3A1,COL4A2,COL5A1,COL5A2,COL6A1,COL6A2,COL6A3,COL9A2,CPD,CPXM1,CR2,CRYBA2,CSF2RA,CSPG4,CTCFL,CTSL,CTTNBP2NL,DCN,DNAH…	185
Cancer,Gastrointestinal Disease,Organismal Injury and Abnormalities	Colorectal carcinoma	7.93e-08			AASS,ABCC10,ADAM19,ADAMTS4,ADORA1,AEBP1,AGAP5 (includes others),AKR1B10,ALDH1L2,ALOX5,ANGPTL4,ANO10,ANPEP,ANTXR2,APBA2,APCDD1L,APLP2,ARHGEF40,ARSI,ATP10A,ATP10D,ATP2A1,ATP2A3,ATP6AP2,ATP8B1,AUTS2,B3GNT3,BCL3,BRSK2,C6orf89,CACNB3,CD44,CDH13,CDH2,CDKN1B,CDYL2,CEACAM1,CFH,CLU,COL12A1,COL4A2,COL5A1,COL5A2,COL6A1,COL6A3,COL9A2,CPD,CPED1,CPXM1,CR2,CRYBA2,CSF2RA,CSPG4,CTCFL,CTTNBP2NL,DCN,DNAH2,ECE1,ECM1…	183
Cancer,Gastrointestinal Disease,Organismal Injury and Abnormalities	Colon cancer	1.12e-07			ABCC10,ADAM19,ADAMTS4,ADORA1,AEBP1,AGAP5 (includes others),AKR1B10,ALDH1L2,ALOX5,ANGPTL4,ANO10,ANPEP,ANTXR2,APBA2,APCDD1L,APLP2,ARHGEF40,ARSI,ATP10A,ATP10D,ATP2A1,ATP2A3,ATP8B1,AUTS2,B3GNT3,BCL3,BRSK2,C6orf89,CACNB3,CD44,CDH13,CDH2,CDKN1B,CDYL2,CEACAM1,CFH,CLDN3,CLU,COL12A1,COL3A1,COL4A2,COL5A1,COL5A2,COL6A1,COL6A2,COL6A3,COL9A2,CPD,CPXM1,CR2,CRYBA2,CSF2RA,CSPG4,CTCFL,CTSL,CTTNBP2NL,DCN,DNAH2,ECE…	182
Cancer,Gastrointestinal Disease,Organismal Injury and Abnormalities	Colon adenocarcinoma	3.56e-07			ABCC10,ADAM19,ADAMTS4,ADORA1,AEBP1,AGAP5 (includes others),AKR1B10,ALDH1L2,ALOX5,ANGPTL4,ANO10,ANPEP,ANTXR2,APBA2,APCDD1L,APLP2,ARHGEF40,ARSI,ATP10A,ATP10D,ATP2A1,ATP2A3,ATP8B1,AUTS2,B3GNT3,BCL3,BRSK2,C6orf89,CACNB3,CDH13,CDH2,CDKN1B,CDYL2,CFH,CLU,COL12A1,COL4A2,COL5A1,COL5A2,COL6A1,COL6A3,COL9A2,CPD,CPXM1,CR2,CRYBA2,CSF2RA,CSPG4,CTCFL,CTTNBP2NL,DCN,DNAH2,ECE1,ECM1,EGR2,EMILIN1,EPHB1,ETV3,FAM171B…	171
Cancer,Gastrointestinal Disease,Organismal Injury and Abnormalities	Colon carcinoma	6.17e-07			ABCC10,ADAM19,ADAMTS4,ADORA1,AEBP1,AGAP5 (includes others),AKR1B10,ALDH1L2,ALOX5,ANGPTL4,ANO10,ANPEP,ANTXR2,APBA2,APCDD1L,APLP2,ARHGEF40,ARSI,ATP10A,ATP10D,ATP2A1,ATP2A3,ATP8B1,AUTS2,B3GNT3,BCL3,BRSK2,C6orf89,CACNB3,CD44,CDH13,CDH2,CDKN1B,CDYL2,CFH,CLU,COL12A1,COL4A2,COL5A1,COL5A2,COL6A1,COL6A3,COL9A2,CPD,CPXM1,CR2,CRYBA2,CSF2RA,CSPG4,CTCFL,CTTNBP2NL,DCN,DNAH2,ECE1,ECM1,EGR2,EMILIN1,EPHB1,ETV3,FA…	172
Cancer,Hematological Disease,Immunological Disease,Organismal Injury and Abnormalities	Peripheral T-cell lymphoma	8e-19			ADAM19,CD151,CDH11,CLU,COL12A1,COL1A2,COL3A1,COL4A1,COL4A2,COL6A1,COL6A2,CR2,EFEMP2,ENG,FN1,GAS6,GJA1,HSP90B1,IFI44,IFIT2,IFIT3,ITGA5,MME,MMP1,MMP2,NCAM1,OSMR,PCOLCE,PDCD1,PDGFRB,SERPINF1,SP100,SP110,SPARC,THY1,TRIM38,TUBA1A,VWA1	38
Cancer,Hematological Disease,Immunological Disease,Organismal Injury and Abnormalities	T-cell non-Hodgkin lymphoma	9.23e-15		-0.392	ADAM19,ADORA1,CD151,CDH11,CDKN1B,CLU,COL12A1,COL1A1,COL1A2,COL3A1,COL4A1,COL4A2,COL6A1,COL6A2,CR2,DCN,EFEMP2,ENG,FN1,GAS6,GJA1,HSP90B1,IER3,IFI44,IFIT2,IFIT3,IL13RA2,IL15,ITGA5,KIT,MME,MMP1,MMP2,NCAM1,OSMR,PCOLCE,PDCD1,PDGFRB,SELPLG,SERPINF1,SP100,SP110,SPARC,THY1,TIMP3,TRIM38,TUBA1A,VWA1	48
Cancer,Hematological Disease,Immunological Disease,Organismal Injury and Abnormalities	Lymphocytic cancer	1.28e-14		0.213	AASS,ABCA7,ADAM19,ADORA1,ALDH1L2,ALOX5,ANPEP,ATP10A,B3GNT3,BCL3,CACNB3,CD151,CD44,CD70,CDH11,CDKN1B,CLMP,CLU,COL12A1,COL1A1,COL1A2,COL3A1,COL4A1,COL4A2,COL6A1,COL6A2,COL6A3,CPD,CR2,CRYAB,CSF2RA,CTSK,CTSL,DCN,DENND6A,DMBX1,DPT,EFEMP2,EGR2,ENG,EXT2,FAP,FGFR1,FN1,GAS6,GFAP,GIPR,GJA1,HSP90B1,HSPA5,IER3,IFI44,IFIT2,IFIT3,IGFBP5,IL13RA2,IL15,IL18,IL7R,INHBA,ITGA5,ITGB3,ITPR2,JUNB,KIT,LRP10,LTBP1,LTBP2,…	117
Cancer,Hematological Disease,Immunological Disease,Organismal Injury and Abnormalities	Neoplasia of leukocytes	1.81e-14		0.008	AASS,ABCA7,ADAM19,ADORA1,ALDH1L2,ALOX5,ANPEP,ATP10A,B3GNT3,BCL3,CACNB3,CD151,CD44,CD70,CDH11,CDKN1B,CLMP,CLU,COL12A1,COL1A1,COL1A2,COL3A1,COL4A1,COL4A2,COL6A1,COL6A2,COL6A3,CPD,CR2,CRYAB,CSF2RA,CTSK,CTSL,DCN,DENND6A,DMBX1,DPT,EFEMP2,EGR2,ENG,EXT2,FAP,FGFR1,FN1,GAS6,GFAP,GIPR,GJA1,HSP90B1,HSPA5,IER3,IFI44,IFIT2,IFIT3,IGFBP5,IL13RA2,IL15,IL18,IL7R,INHBA,ITGA5,ITGB3,ITPR2,JUNB,KIT,LRP10,LTBP1,LTBP2,…	117
Cancer,Hematological Disease,Immunological Disease,Organismal Injury and Abnormalities	Mature T-cell neoplasm	3.07e-13			ADAM19,CD151,CDH11,CLU,COL12A1,COL1A1,COL1A2,COL3A1,COL4A1,COL4A2,COL6A1,COL6A2,CR2,EFEMP2,ENG,FN1,GAS6,GIPR,GJA1,HSP90B1,IFI44,IFIT2,IFIT3,IL13RA2,IL15,ITGA5,KIT,MME,MMP1,MMP2,NCAM1,OSMR,PCOLCE,PDCD1,PDGFRB,SELPLG,SERPINF1,SP100,SP110,SPARC,THY1,TIMP3,TRIM38,TUBA1A,VWA1	45
Cancer,Hematological Disease,Immunological Disease,Organismal Injury and Abnormalities	T-cell malignant neoplasm	4.63e-13		-0.392	ADAM19,ADORA1,ANPEP,CD151,CDH11,CDKN1B,CLU,COL12A1,COL1A1,COL1A2,COL3A1,COL4A1,COL4A2,COL6A1,COL6A2,CR2,DCN,EFEMP2,ENG,FN1,GAS6,GIPR,GJA1,HSP90B1,IER3,IFI44,IFIT2,IFIT3,IL13RA2,IL15,IL7R,ITGA5,ITPR2,KIT,MME,MMP1,MMP2,NCAM1,NRXN3,OSMR,PCOLCE,PDCD1,PDGFRB,SELPLG,SERPINF1,SP100,SP110,SPARC,THY1,TIMP3,TRIM38,TUBA1A,VWA1,ZNF835	54
Cancer,Hematological Disease,Organismal Injury and Abnormalities	Neoplasia of blood cells	1.4e-15		-0.109	AASS,ABCA7,ADAM19,ADORA1,AGAP5 (includes others),ALDH1L2,ALOX5,ANGPTL2,ANGPTL4,ANPEP,ARSI,ATP10A,ATP8B1,B3GNT3,BAALC,BCL3,BMP1,CACNB3,CALR,CD151,CD44,CD70,CDH11,CDKN1B,CLMP,CLU,COL12A1,COL16A1,COL1A1,COL1A2,COL3A1,COL4A1,COL4A2,COL5A2,COL6A1,COL6A2,COL6A3,CP,CPD,CR2,CRYAB,CSF2RA,CSF3,CSPG4,CTSK,CTSL,CYP26A1,DCN,DENND6A,DMBX1,DNAH2,DPT,DRD1,ECE1,EFEMP2,EGR2,ENG,EPHB1,EXT2,FAP,FGFR1,FN1,GABBR2,GAS6…	168
Cancer,Hematological Disease,Organismal Injury and Abnormalities	Hematopoietic neoplasm	1.63e-15		-0.249	AASS,ABCA7,ADAM19,ADORA1,AGAP5 (includes others),ALDH1L2,ALOX5,ANGPTL2,ANGPTL4,ANPEP,ARSI,ATP10A,ATP8B1,B3GNT3,BAALC,BCL3,BMP1,CACNB3,CALR,CD151,CD44,CD70,CDH11,CDKN1B,CLMP,CLU,COL12A1,COL16A1,COL1A1,COL1A2,COL3A1,COL4A1,COL4A2,COL5A2,COL6A1,COL6A2,COL6A3,CP,CPD,CR2,CRYAB,CSF2RA,CSF3,CSPG4,CTSK,CTSL,CYP26A1,DCN,DENND6A,DMBX1,DNAH2,DPT,DRD1,ECE1,EFEMP2,EGR2,ENG,EPHB1,EXT2,FAP,FGFR1,FN1,GABBR2,GAS6…	169
Cancer,Hematological Disease,Organismal Injury and Abnormalities	Hematologic cancer	1.09e-14		0.035	AASS,ABCA7,ADAM19,ADORA1,AGAP5 (includes others),ALDH1L2,ALOX5,ANGPTL2,ANGPTL4,ANPEP,ARSI,ATP10A,ATP8B1,B3GNT3,BAALC,BCL3,CACNB3,CALR,CD151,CD44,CD70,CDH11,CDKN1B,CLMP,CLU,COL12A1,COL16A1,COL1A1,COL1A2,COL3A1,COL4A1,COL4A2,COL5A2,COL6A1,COL6A2,COL6A3,CP,CPD,CR2,CRYAB,CSF2RA,CSF3,CSPG4,CTSK,CTSL,CYP26A1,DCN,DENND6A,DMBX1,DNAH2,DPT,DRD1,ECE1,EFEMP2,EGR2,ENG,EPHB1,EXT2,FAP,FGFR1,FN1,GABBR2,GAS6,GFAP…	165
Cancer,Hematological Disease,Organismal Injury and Abnormalities	Lymphocytic neoplasm	1.41e-14		0.213	AASS,ABCA7,ADAM19,ADORA1,ALDH1L2,ALOX5,ANPEP,ATP10A,B3GNT3,BCL3,CACNB3,CD151,CD44,CD70,CDH11,CDKN1B,CLMP,CLU,COL12A1,COL1A1,COL1A2,COL3A1,COL4A1,COL4A2,COL6A1,COL6A2,COL6A3,CPD,CR2,CRYAB,CSF2RA,CTSK,CTSL,DCN,DENND6A,DMBX1,DPT,EFEMP2,EGR2,ENG,EXT2,FAP,FGFR1,FN1,GAS6,GFAP,GIPR,GJA1,HSP90B1,HSPA5,IER3,IFI44,IFIT2,IFIT3,IGFBP5,IL13RA2,IL15,IL18,IL7R,INHBA,ITGA5,ITGB3,ITPR2,JUNB,KIT,LRP10,LTBP1,LTBP2,…	117
Cancer,Hematological Disease,Organismal Injury and Abnormalities	Hematologic cancer of cells	5.85e-14		0.474	AASS,ABCA7,ADAM19,ADORA1,ALDH1L2,ALOX5,ANPEP,ATP10A,B3GNT3,BCL3,CACNB3,CD151,CD44,CD70,CDH11,CDKN1B,CLMP,CLU,COL12A1,COL1A1,COL1A2,COL3A1,COL4A1,COL4A2,COL6A1,COL6A2,COL6A3,CPD,CR2,CSF2RA,CTSL,DCN,DENND6A,DMBX1,DPT,EFEMP2,EGR2,ENG,EXT2,FAP,FGFR1,FN1,GAS6,GFAP,GIPR,GJA1,HSP90B1,HSPA5,IER3,IFI44,IFIT2,IFIT3,IL13RA2,IL15,IL18,IL7R,ITGA5,ITGB3,ITPR2,JUNB,KIT,LRP10,LTBP1,LTBP2,MME,MMP1,MMP2,MSC,NCAM1,…	111
Cancer,Neurological Disease,Organismal Injury and Abnormalities	Central nervous system tumor	1.49e-09		1.603	ABCC10,ADAM19,ADAMTS4,ADORA1,AGAP5 (includes others),AZIN2,B3GNT3,CD44,CDKN1B,CLMP,CLU,COL12A1,COL1A1,COL1A2,COL3A1,COL4A1,COL4A2,COL6A2,CPED1,CSF2RA,CSF3,CSPG4,CYGB,DKK3,DPT,ENG,EPHB1,FAM171B,FGF5,FGFR1,FN1,GFAP,GJA1,GLT8D2,GRK5,HSP90B1,HSPA5,IGFBP5,IL13RA2,IL15,IL18,IL1R1,ITGB3,KCNAB1,KIT,LYST,MICA,MMP1,MMP14,MMP2,MSC,NCAM1,NOVA1,NRP1,OSMR,P4HA2,PDCD1,PDGFRB,PIK3C2B,PKIA,PLAC8,RNF213,SEMA5A,SER…	79
Cancer,Neurological Disease,Organismal Injury and Abnormalities	Central nervous system solid tumor	2.93e-09		1.603	ABCC10,ADAM19,ADAMTS4,ADORA1,AGAP5 (includes others),AZIN2,B3GNT3,CD44,CDKN1B,CLMP,CLU,COL12A1,COL1A1,COL1A2,COL3A1,COL4A1,COL4A2,COL6A2,CPED1,CSF2RA,CSF3,CSPG4,CYGB,DKK3,DPT,ENG,EPHB1,FAM171B,FGF5,FGFR1,FN1,GFAP,GJA1,GLT8D2,GRK5,HSP90B1,HSPA5,IGFBP5,IL13RA2,IL15,IL18,IL1R1,ITGB3,KCNAB1,KIT,LYST,MICA,MMP1,MMP14,MSC,NCAM1,NOVA1,NRP1,OSMR,P4HA2,PDCD1,PDGFRB,PIK3C2B,PKIA,PLAC8,RNF213,SEMA5A,SERINC2,…	78
Cancer,Neurological Disease,Organismal Injury and Abnormalities	Nervous system neoplasm	6.23e-09		1.62	ABCC10,ADAM19,ADAMTS4,ADORA1,AGAP5 (includes others),AZIN2,B3GNT3,CD44,CDKN1B,CLMP,CLU,COL12A1,COL1A1,COL1A2,COL3A1,COL4A1,COL4A2,COL6A2,CPED1,CSF2RA,CSF3,CSPG4,CYGB,DKK3,DPT,ENG,EPHB1,FAM171B,FAP,FGF5,FGFR1,FN1,GFAP,GJA1,GLT8D2,GRK5,HSP90B1,HSPA5,IGFBP5,IL13RA2,IL15,IL18,IL1R1,ITGB3,KCNAB1,KIT,LYST,MICA,MMP1,MMP14,MMP2,MSC,NCAM1,NOVA1,NRP1,OSMR,P4HA2,PDCD1,PDGFRB,PIK3C2B,PKIA,PLAC8,RNF213,SEMA5A…	80
Cancer,Neurological Disease,Organismal Injury and Abnormalities	Central nervous system cancer	1.45e-08			ABCC10,ADAMTS4,ADORA1,AGAP5 (includes others),AZIN2,B3GNT3,CD44,CDKN1B,CLMP,CLU,COL12A1,COL1A1,COL1A2,COL3A1,COL4A1,COL4A2,COL6A2,CSF2RA,CSPG4,DKK3,DPT,ENG,EPHB1,FAM171B,FGF5,FGFR1,FN1,GFAP,GLT8D2,GRK5,HSP90B1,HSPA5,IGFBP5,IL13RA2,IL15,IL1R1,ITGB3,KCNAB1,KIT,LYST,MICA,MMP1,MMP14,MMP2,MSC,NCAM1,NRP1,OSMR,P4HA2,PDCD1,PDGFRB,PIK3C2B,PKIA,PLAC8,RNF213,SERINC2,SERPINE1,SPHK1,SPTBN4,TAGLN,TCF4,TGFB1I1,…	68
Cancer,Neurological Disease,Organismal Injury and Abnormalities	Glioma	9.7e-07		0.929	ABCC10,ADORA1,AGAP5 (includes others),AZIN2,CD44,CDKN1B,CLU,COL1A1,COL1A2,COL3A1,COL4A1,COL4A2,CPED1,CSF2RA,CSF3,CSPG4,CYGB,DKK3,ENG,EPHB1,FAM171B,FGF5,FGFR1,FN1,GFAP,GJA1,GLT8D2,GRK5,HSP90B1,HSPA5,IGFBP5,IL13RA2,IL15,IL18,IL1R1,ITGB3,KCNAB1,KIT,LYST,MICA,MMP14,NCAM1,NOVA1,NRP1,P4HA2,PDCD1,PDGFRB,PIK3C2B,RNF213,SEMA5A,SERINC2,SERPINE1,SPARC,SPHK1,SPTBN4,TAGLN,TLE3,TNFRSF1A,TRPV2,TSHZ3,TUBA1A,WNT5…	63
Cancer,Organismal Injury and Abnormalities	Non-melanoma solid tumor	2.25e-24		1.054	AASS,ABCA7,ABCC10,ACTA2,ACTG2,ADAM19,ADAMTS4,ADIRF,ADORA1,AEBP1,AGA,AGAP5 (includes others),AKR1B10,ALDH1L2,ALOX5,ANGPTL1,ANGPTL2,ANGPTL4,ANKRD1,ANKRD2,ANO10,ANPEP,ANTXR2,ANXA9,APBA2,APCDD1L,APLP2,APOL6,ARHGEF40,ARMC2,ARSI,AS3MT,ATP10A,ATP10D,ATP2A1,ATP2A3,ATP6AP2,ATP8B1,AUTS2,AZGP1,AZIN2,B3GNT3,BAALC,BCL3,BMP1,BNC1,BRSK2,C11orf52,C1S,C2CD4D,C6orf89,CACNB3,CALR,CAMK2N2,CD151,CD44,CD70,CD81,CDH11,…	429
Cancer,Organismal Injury and Abnormalities	Non-hematological solid tumor	2.69e-24		0.179	A4GALT,AASS,ABCA7,ABCC10,ACTA2,ACTG2,ADAM19,ADAMTS4,ADIRF,ADORA1,AEBP1,AGA,AGAP5 (includes others),AKR1B10,ALDH1L2,ALOX5,ANGPTL1,ANGPTL2,ANGPTL4,ANKRD1,ANKRD2,ANO10,ANPEP,ANTXR2,ANXA9,APBA2,APCDD1L,APLP2,APOL6,ARHGEF40,ARMC2,ARSI,AS3MT,ATP10A,ATP10D,ATP2A1,ATP2A3,ATP6AP2,ATP8B1,AUTS2,AZGP1,AZIN2,B3GNT3,BAALC,BCL3,BMP1,BNC1,BRSK2,C11orf52,C1S,C2CD4D,C6orf89,CACNB3,CALR,CAMK2N2,CD44,CD70,CD81,CDH11…	431
Cancer,Organismal Injury and Abnormalities	Nonhematologic malignant neoplasm	3.19e-24		-0.08	A4GALT,AASS,ABCA7,ABCC10,ACTA2,ACTG2,ADAM19,ADAMTS4,ADIRF,ADORA1,AEBP1,AGA,AGAP5 (includes others),AKR1B10,ALDH1L2,ALOX5,ANGPTL1,ANGPTL2,ANGPTL4,ANKRD1,ANKRD2,ANO10,ANPEP,ANTXR2,ANXA9,APBA2,APCDD1L,APLP2,APOL6,ARHGEF40,ARMC2,ARSI,AS3MT,ATP10A,ATP10D,ATP2A1,ATP2A3,ATP6AP2,ATP8B1,AUTS2,AZGP1,AZIN2,B3GNT3,BAALC,BCL3,BMP1,BNC1,BRSK2,C11orf52,C1S,C2CD4D,C6orf89,CACNB3,CALR,CAMK2N2,CD44,CD70,CD81,CDH11…	430
Cancer,Organismal Injury and Abnormalities	Carcinoma	6.16e-24		-0.159	AASS,ABCA7,ABCC10,ACTA2,ACTG2,ADAM19,ADAMTS4,ADIRF,ADORA1,AEBP1,AGA,AGAP5 (includes others),AKR1B10,ALDH1L2,ALOX5,ANGPTL1,ANGPTL2,ANGPTL4,ANKRD1,ANKRD2,ANO10,ANPEP,ANTXR2,ANXA9,APBA2,APCDD1L,APLP2,APOL6,ARHGEF40,ARMC2,ARSI,AS3MT,ATP10A,ATP10D,ATP2A1,ATP2A3,ATP6AP2,ATP8B1,AUTS2,AZGP1,AZIN2,B3GNT3,BAALC,BCL3,BMP1,BNC1,BRSK2,C11orf52,C1S,C2CD4D,C6orf89,CACNB3,CALR,CAMK2N2,CD44,CD70,CD81,CDH11,CDH13,…	426
Cancer,Organismal Injury and Abnormalities	Extracranial solid tumor	2.11e-23		0.844	A4GALT,AASS,ABCA7,ABCC10,ACTA2,ACTG2,ADAM19,ADAMTS4,ADIRF,ADORA1,AEBP1,AGA,AGAP5 (includes others),AKR1B10,ALDH1L2,ALOX5,ANGPTL1,ANGPTL2,ANGPTL4,ANKRD1,ANKRD2,ANO10,ANPEP,ANTXR2,ANXA9,APBA2,APCDD1L,APLP2,APOL6,ARHGEF40,ARMC2,ARSI,AS3MT,ATP10A,ATP10D,ATP2A1,ATP2A3,ATP6AP2,ATP8B1,AUTS2,AZGP1,AZIN2,B3GNT3,B4GAT1,BAALC,BCL3,BMP1,BNC1,BRSK2,C11orf52,C1S,C2CD4D,C6orf89,CACNB3,CALR,CAMK2N2,CD151,CD44,CD…	434
Cancer,Organismal Injury and Abnormalities	Malignant solid tumor	2.8e-23		1.116	A4GALT,AASS,ABCA7,ABCC10,ACTA2,ACTG2,ADAM19,ADAMTS4,ADIRF,ADORA1,AEBP1,AGA,AGAP5 (includes others),AKR1B10,ALDH1L2,ALOX5,ANGPTL1,ANGPTL2,ANGPTL4,ANKRD1,ANKRD2,ANO10,ANPEP,ANTXR2,ANXA9,APBA2,APCDD1L,APLP2,APOL6,ARHGEF40,ARMC2,ARSI,AS3MT,ATP10A,ATP10D,ATP2A1,ATP2A3,ATP6AP2,ATP8B1,AUTS2,AZGP1,AZIN2,B3GNT3,BAALC,BCL3,BMP1,BNC1,BRSK2,C11orf52,C1S,C2CD4D,C6orf89,CACNB3,CALR,CAMK2N2,CD151,CD44,CD70,CD81…	434
Cancer,Organismal Injury and Abnormalities	Solid tumor	7.24e-23		1.295	A4GALT,AASS,ABCA7,ABCC10,ACTA2,ACTG2,ADAM19,ADAMTS4,ADIRF,ADORA1,AEBP1,AGA,AGAP5 (includes others),AKR1B10,ALDH1L2,ALOX5,ANGPTL1,ANGPTL2,ANGPTL4,ANKRD1,ANKRD2,ANO10,ANPEP,ANTXR2,ANXA9,APBA2,APCDD1L,APLP2,APOL6,ARHGEF40,ARMC2,ARSI,AS3MT,ATP10A,ATP10D,ATP2A1,ATP2A3,ATP6AP2,ATP8B1,AUTS2,AZGP1,AZIN2,B3GNT3,B4GAT1,BAALC,BCL3,BMP1,BNC1,BRSK2,C11orf52,C1S,C2CD4D,C6orf89,CACNB3,CALR,CAMK2N2,CD151,CD44,CD…	435
Cancer,Organismal Injury and Abnormalities	Abdominal neoplasm	1.95e-22		-0.333	AASS,ABCA7,ABCC10,ACTA2,ACTG2,ADAM19,ADAMTS4,ADIRF,ADORA1,AEBP1,AGA,AGAP5 (includes others),AKR1B10,ALDH1L2,ALOX5,ANGPTL1,ANGPTL2,ANGPTL4,ANKRD1,ANO10,ANPEP,ANTXR2,ANXA9,APBA2,APCDD1L,APLP2,APOL6,ARHGEF40,ARMC2,ARSI,ATP10A,ATP10D,ATP2A1,ATP2A3,ATP6AP2,ATP8B1,AUTS2,AZGP1,B3GNT3,B4GAT1,BAALC,BCL3,BMP1,BNC1,BRSK2,C1S,C2CD4D,C6orf89,CACNB3,CALR,CAMK2N2,CD44,CD70,CD81,CDH11,CDH13,CDH2,CDKN1B,CDYL2,CEA…	412
Cancer,Organismal Injury and Abnormalities	Adenocarcinoma	5.36e-22		0.785	AASS,ABCA7,ABCC10,ACTA2,ACTG2,ADAM19,ADAMTS4,ADORA1,AEBP1,AGA,AGAP5 (includes others),AKR1B10,ALDH1L2,ALOX5,ANGPTL1,ANGPTL2,ANGPTL4,ANKRD1,ANO10,ANPEP,ANTXR2,ANXA9,APBA2,APCDD1L,APLP2,APOL6,ARHGEF40,ARMC2,ARSI,ATP10A,ATP10D,ATP2A1,ATP2A3,ATP6AP2,ATP8B1,AUTS2,AZGP1,B3GNT3,BAALC,BCL3,BMP1,BNC1,BRSK2,C1S,C2CD4D,C6orf89,CACNB3,CD44,CD70,CD81,CDH11,CDH13,CDH2,CDKN1B,CDYL2,CEACAM1,CFH,CH25H,CLDN3,CLMP,…	389
Cancer,Organismal Injury and Abnormalities	Abdominal cancer	1.42e-21		-0.159	AASS,ABCA7,ABCC10,ACTA2,ACTG2,ADAM19,ADAMTS4,ADIRF,ADORA1,AEBP1,AGA,AGAP5 (includes others),AKR1B10,ALDH1L2,ALOX5,ANGPTL1,ANGPTL2,ANGPTL4,ANKRD1,ANO10,ANPEP,ANTXR2,ANXA9,APBA2,APCDD1L,APLP2,APOL6,ARHGEF40,ARMC2,ARSI,ATP10A,ATP10D,ATP2A1,ATP2A3,ATP6AP2,ATP8B1,AUTS2,AZGP1,B3GNT3,BAALC,BCL3,BMP1,BNC1,BRSK2,C1S,C2CD4D,C6orf89,CACNB3,CALR,CAMK2N2,CD44,CD70,CD81,CDH11,CDH13,CDH2,CDKN1B,CDYL2,CEACAM1,CE…	407
Cancer,Organismal Injury and Abnormalities	Abdominal carcinoma	2.07e-21		0.049	AASS,ABCA7,ABCC10,ACTA2,ACTG2,ADAM19,ADAMTS4,ADORA1,AEBP1,AGA,AGAP5 (includes others),AKR1B10,ALDH1L2,ALOX5,ANGPTL1,ANGPTL2,ANGPTL4,ANKRD1,ANO10,ANPEP,ANTXR2,ANXA9,APBA2,APCDD1L,APLP2,APOL6,ARHGEF40,ARMC2,ARSI,ATP10A,ATP10D,ATP2A1,ATP2A3,ATP6AP2,ATP8B1,AUTS2,AZGP1,B3GNT3,BAALC,BCL3,BMP1,BNC1,BRSK2,C1S,C2CD4D,C6orf89,CACNB3,CAMK2N2,CD44,CD70,CD81,CDH11,CDH13,CDH2,CDKN1B,CDYL2,CEACAM1,CELF5,CFH,CH2…	398
Cancer,Organismal Injury and Abnormalities	Abdominal adenocarcinoma	2.48e-21			AASS,ABCA7,ABCC10,ACTA2,ACTG2,ADAM19,ADAMTS4,ADORA1,AEBP1,AGA,AGAP5 (includes others),AKR1B10,ALDH1L2,ALOX5,ANGPTL1,ANGPTL2,ANGPTL4,ANKRD1,ANO10,ANPEP,ANTXR2,ANXA9,APBA2,APCDD1L,APLP2,APOL6,ARHGEF40,ARMC2,ARSI,ATP10A,ATP10D,ATP2A1,ATP2A3,ATP6AP2,ATP8B1,AUTS2,AZGP1,B3GNT3,BAALC,BCL3,BMP1,BNC1,BRSK2,C1S,C2CD4D,C6orf89,CACNB3,CD44,CD70,CD81,CDH11,CDH13,CDH2,CDKN1B,CDYL2,CEACAM1,CFH,CH25H,CLDN3,CLMP,…	382
Cancer,Organismal Injury and Abnormalities	Anogenital cancer	2.38e-19		1.45	AASS,ABCC10,ACTA2,ACTG2,ADAM19,ADAMTS4,ADORA1,AEBP1,AGAP5 (includes others),ALDH1L2,ALOX5,ANGPTL1,ANGPTL2,ANKRD1,ANO10,ANPEP,ANTXR2,ANXA9,APBA2,ARHGEF40,ATP10A,ATP10D,ATP2A1,ATP2A3,ATP6AP2,ATP8B1,AZGP1,AZIN2,B3GNT3,BMP1,BNC1,BRSK2,C11orf52,C1S,C2CD4D,C6orf89,CACNB3,CAMK2N2,CD44,CD70,CDH11,CDH13,CDH2,CDKN1B,CDYL2,CEACAM1,CFH,CLDN3,CLU,CNN1,COL12A1,COL13A1,COL1A1,COL1A2,COL3A1,COL4A1,COL4A2,COL5A1,…	299
Cancer,Organismal Injury and Abnormalities	Malignant genitourinary solid tumor	5.53e-19		1.45	AASS,ABCC10,ACTA2,ACTG2,ADAM19,ADAMTS4,ADORA1,AEBP1,AGAP5 (includes others),ALDH1L2,ALOX5,ANGPTL1,ANGPTL2,ANKRD1,ANO10,ANPEP,ANTXR2,ANXA9,APBA2,ARHGEF40,ATP10A,ATP10D,ATP2A1,ATP2A3,ATP6AP2,ATP8B1,AUTS2,AZGP1,AZIN2,B3GNT3,BMP1,BNC1,BRSK2,C11orf52,C1S,C2CD4D,C6orf89,CACNB3,CALR,CAMK2N2,CD44,CD70,CDH11,CDH13,CDH2,CDKN1B,CDYL2,CEACAM1,CELF5,CFH,CH25H,CLDN3,CLU,CNN1,COL12A1,COL13A1,COL1A1,COL1A2,COL3A…	314
Cancer,Organismal Injury and Abnormalities	Genitourinary tumor	6.54e-19		1.381	AASS,ABCC10,ACTA2,ACTG2,ADAM19,ADAMTS4,ADORA1,AEBP1,AGAP5 (includes others),ALDH1L2,ALOX5,ANGPTL1,ANGPTL2,ANKRD1,ANO10,ANPEP,ANTXR2,ANXA9,APBA2,ARHGEF40,ATP10A,ATP10D,ATP2A1,ATP2A3,ATP6AP2,ATP8B1,AUTS2,AZGP1,AZIN2,B3GNT3,B4GAT1,BMP1,BNC1,BRSK2,C11orf52,C1S,C2CD4D,C6orf89,CACNB3,CALR,CAMK2N2,CD151,CD44,CD70,CDH11,CDH13,CDH2,CDKN1B,CDYL2,CEACAM1,CELF5,CFH,CH25H,CLDN3,CLU,CNN1,COL12A1,COL13A1,COL1A1…	318
Cancer,Organismal Injury and Abnormalities	Cancer of secretory structure	7.64e-17		0.832	ABCA7,ABCC10,ACTA2,ACTG2,ADAM19,ADAMTS4,ADIRF,AEBP1,AGA,AGAP5 (includes others),ALDH1L2,ALOX5,ANGPTL1,ANGPTL2,ANGPTL4,ANKRD1,ANKRD2,ANO10,ANPEP,ANTXR2,ANXA9,APBA2,APCDD1L,APLP2,ARHGEF40,ARMC2,AS3MT,ATP10A,ATP10D,ATP2A1,ATP2A3,ATP6AP2,ATP8B1,AUTS2,AZGP1,B3GNT3,BAALC,BCL3,BMP1,BNC1,BRSK2,C1S,C2CD4D,C6orf89,CACNB3,CALR,CAMK2N2,CD44,CD70,CD81,CDH11,CDH13,CDH2,CDKN1B,CDYL2,CEACAM1,CELF5,CFH,CH25H,CLDN…	368
Cancer,Organismal Injury and Abnormalities	Pelvic tumor	1.44e-16		0.192	AASS,ABCC10,ACTG2,ADAM19,ADAMTS4,ADORA1,AEBP1,AGAP5 (includes others),ALDH1L2,ALOX5,ANGPTL1,ANGPTL2,ANKRD1,ANPEP,ANTXR2,ANXA9,APBA2,ARHGEF40,ATP10A,ATP10D,ATP2A1,ATP2A3,ATP6AP2,ATP8B1,AUTS2,AZGP1,B3GNT3,B4GAT1,BMP1,BNC1,BRSK2,C1S,C6orf89,CACNB3,CALR,CAMK2N2,CD44,CD70,CDH11,CDH13,CDH2,CDKN1B,CDYL2,CEACAM1,CELF5,CFH,CH25H,CLDN3,CLU,CNN1,COL12A1,COL13A1,COL1A1,COL1A2,COL3A1,COL4A1,COL4A2,COL5A1,COL5…	285
Cancer,Organismal Injury and Abnormalities	Incidence of tumor	4.4e-16		0.641	AASS,ABCC10,ACTA2,ACTG2,ADAM19,ADAMTS4,ADORA1,AEBP1,AGAP5 (includes others),AKR1B10,ALDH1L2,ALOX5,ANGPTL2,ANGPTL4,ANO10,ANPEP,ANTXR2,ANXA9,APBA2,APCDD1L,APLP2,ARHGEF40,ARMC2,ARSI,ATP10A,ATP10D,ATP2A1,ATP2A3,ATP6AP2,ATP8B1,AUTS2,AZGP1,B3GNT3,BCL3,BNC1,BRSK2,C1S,C6orf89,CACNB3,CALR,CD151,CD44,CD70,CDH11,CDH13,CDH2,CDKN1B,CDYL2,CEACAM1,CFH,CLDN3,CLU,CNN1,COL12A1,COL13A1,COL1A1,COL1A2,COL3A1,COL4A1,C…	316
Cancer,Organismal Injury and Abnormalities	Pelvic cancer	1.17e-15			AASS,ABCC10,ACTG2,ADAM19,ADAMTS4,ADORA1,AEBP1,AGAP5 (includes others),ALDH1L2,ALOX5,ANGPTL1,ANGPTL2,ANKRD1,ANPEP,ANTXR2,ANXA9,APBA2,ARHGEF40,ATP10A,ATP10D,ATP2A1,ATP2A3,ATP6AP2,ATP8B1,AUTS2,AZGP1,B3GNT3,BMP1,BNC1,BRSK2,C1S,C6orf89,CACNB3,CALR,CAMK2N2,CD44,CD70,CDH11,CDH13,CDH2,CDKN1B,CDYL2,CEACAM1,CELF5,CFH,CH25H,CLDN3,CLU,CNN1,COL12A1,COL13A1,COL1A1,COL1A2,COL3A1,COL4A1,COL4A2,COL5A1,COL5A2,COL6…	279
Cancer,Organismal Injury and Abnormalities	Head and neck tumor	2.88e-15		-0.027	ABCA7,ABCC10,ACTA2,ACTG2,ADAM19,ADAMTS4,ADIRF,ADORA1,AEBP1,AGA,AGAP5 (includes others),ALDH1L2,ALOX5,ANGPTL2,ANGPTL4,ANKRD1,ANKRD2,ANO10,ANPEP,ANTXR2,ANXA9,APBA2,APCDD1L,APLP2,ARHGEF40,ARMC2,AS3MT,ATP10A,ATP10D,ATP2A1,ATP2A3,ATP6AP2,ATP8B1,AUTS2,AZGP1,AZIN2,B3GNT3,BAALC,BCL3,BMP1,BRSK2,C1S,C2CD4D,C6orf89,CACNB3,CALR,CAMK2N2,CD44,CD70,CD81,CDH11,CDH13,CDH2,CDKN1B,CDYL2,CELF5,CFH,CH25H,CLDN3,CLMP,C…	354
Cancer,Organismal Injury and Abnormalities	Head and neck cancer	3.34e-15		0.234	ABCA7,ABCC10,ACTA2,ACTG2,ADAM19,ADAMTS4,ADIRF,ADORA1,AEBP1,AGA,AGAP5 (includes others),ALDH1L2,ALOX5,ANGPTL2,ANGPTL4,ANKRD1,ANKRD2,ANO10,ANPEP,ANTXR2,ANXA9,APBA2,APCDD1L,APLP2,ARHGEF40,ARMC2,AS3MT,ATP10A,ATP10D,ATP2A1,ATP2A3,ATP6AP2,ATP8B1,AUTS2,AZGP1,AZIN2,B3GNT3,BAALC,BCL3,BMP1,BRSK2,C1S,C2CD4D,C6orf89,CACNB3,CALR,CAMK2N2,CD44,CD70,CD81,CDH11,CDH13,CDH2,CDKN1B,CDYL2,CELF5,CFH,CH25H,CLDN3,CLMP,C…	351
Cancer,Organismal Injury and Abnormalities	Benign solid tumor	3.37e-15		0.285	ACTA2,AEBP1,ANGPTL1,ANGPTL2,ANTXR2,ATP2A1,BCL3,CALR,CD44,CDH2,CDKN1B,CEACAM1,CFH,CLU,COL12A1,COL13A1,COL16A1,COL1A1,COL1A2,COL3A1,COL4A1,COL4A2,COL5A1,COL5A2,COL6A1,COL6A2,COL6A3,COL9A2,CRABP2,CRYAB,DCN,DPT,EDNRA,ENG,FGFR1,FOXO4,IFIT1,IFIT3,IGFBP5,INHBA,KIT,LTBP1,MMP1,MMP11,MMP14,MMP2,MMP3,NAV1,NCAM1,NRP1,NRXN3,OXTR,PDCD1LG2,PDGFRB,PIK3C2B,PKIA,PPARA,SERPINB2,SERPINE1,SERPINE2,SPON2,SPSB1,THY1,TN…	70
Cancer,Organismal Injury and Abnormalities	Genitourinary carcinoma	5.24e-15			AASS,ABCC10,ACTA2,ACTG2,ADAM19,ADAMTS4,ADORA1,AEBP1,AGAP5 (includes others),ALDH1L2,ALOX5,ANGPTL1,ANGPTL2,ANKRD1,ANPEP,ANTXR2,ANXA9,APBA2,ARHGEF40,ATP10A,ATP10D,ATP2A1,ATP2A3,ATP6AP2,ATP8B1,AUTS2,AZGP1,B3GNT3,BMP1,BNC1,BRSK2,C11orf52,C1S,C6orf89,CACNB3,CAMK2N2,CD44,CD70,CDH11,CDH13,CDH2,CDKN1B,CDYL2,CEACAM1,CELF5,CFH,CH25H,CLDN3,CLU,CNN1,COL12A1,COL13A1,COL1A1,COL1A2,COL3A1,COL4A1,COL4A2,COL5A1,C…	275
Cancer,Organismal Injury and Abnormalities	Mesenchymal tumor	5.92e-15			ANTXR2,CD44,COL12A1,COL13A1,COL16A1,COL1A1,COL1A2,COL3A1,COL4A1,COL4A2,COL5A1,COL5A2,COL6A1,COL6A2,COL6A3,COL9A2,CRYAB,ELN,FGFR1,HSP90B1,IL18,KIT,NRP1,NT5E,PDCD1,PDGFRB,SERPINE1,TUBA1A	28
Cancer,Organismal Injury and Abnormalities	Connective or soft tissue tumor	8.15e-15		1.051	ABCC10,ACTA2,ANGPTL4,ANTXR2,APBA2,ARMC2,ATP6AP2,BNC1,C11orf52,CD44,CDH11,CDKN1B,CFH,CLDN3,CNN1,COL12A1,COL13A1,COL16A1,COL1A1,COL1A2,COL3A1,COL4A1,COL4A2,COL5A1,COL5A2,COL6A1,COL6A2,COL6A3,COL9A2,CRABP2,CRYAB,CSF2RA,CSPG4,CTSL,DCN,DPT,ECE1,ELN,ENG,EPHB1,EXT2,FAM171B,FAP,FGFR1,FN1,GABBR2,GPC1,HSP90B1,IFIT1,IFIT3,IGFBP5,IL18,IL1R1,KIT,LTBP1,LYST,MITF,MME,MMP1,MMP11,MMP2,MMP3,NCAM1,NRP1,NT5E,OXTR,PC…	98
Cancer,Organismal Injury and Abnormalities	Lymphohematopoietic cancer	8.4e-15		0.072	AASS,ABCA7,ADAM19,ADORA1,AGAP5 (includes others),ALDH1L2,ALOX5,ANGPTL2,ANGPTL4,ANPEP,ARSI,ATP10A,ATP8B1,B3GNT3,BAALC,BCL3,CACNB3,CALR,CD151,CD44,CD70,CDH11,CDKN1B,CLMP,CLU,COL12A1,COL16A1,COL1A1,COL1A2,COL3A1,COL4A1,COL4A2,COL5A2,COL6A1,COL6A2,COL6A3,CP,CPD,CR2,CRYAB,CSF2RA,CSF3,CSPG4,CTSK,CTSL,CYP26A1,DCN,DENND6A,DMBX1,DNAH2,DPT,DRD1,ECE1,EFEMP2,EGR2,ENG,EPHB1,EXT2,FAP,FGFR1,FN1,GABBR2,GAS6,GFAP…	166
Cancer,Organismal Injury and Abnormalities	Lymphoid cancer	1.13e-14		0.38	AASS,ABCA7,ADAM19,ADORA1,ALDH1L2,ALOX5,ANPEP,ATP10A,B3GNT3,BCL3,CACNB3,CD151,CD44,CD70,CDH11,CDKN1B,CLMP,CLU,COL12A1,COL1A1,COL1A2,COL3A1,COL4A1,COL4A2,COL6A1,COL6A2,COL6A3,CPD,CR2,CRYAB,CSF2RA,CTSK,CTSL,DCN,DENND6A,DMBX1,DPT,EFEMP2,EGR2,ENG,EXT2,FAP,FGFR1,FN1,GAS6,GFAP,GIPR,GJA1,HSP90B1,HSPA5,IER3,IFI44,IFIT2,IFIT3,IGFBP5,IL13RA2,IL15,IL18,IL7R,INHBA,ITGA5,ITGB3,ITPR2,JUNB,KIT,LRP10,LTBP1,LTBP2,…	118
Cancer,Organismal Injury and Abnormalities	Malignant solid organ tumor	1.65e-14		0.964	A4GALT,ABCA7,ABCC10,ADAM19,ADAMTS4,ADORA1,AEBP1,AGA,AKR1B10,ALDH1L2,ALOX5,ANGPTL1,ANGPTL2,ANO10,ANPEP,ANTXR2,ANXA9,APBA2,APCDD1L,APLP2,APOL6,ARMC2,ARSI,ATP10A,ATP10D,ATP2A1,ATP2A3,ATP8B1,AUTS2,AZGP1,BMP1,BNC1,BRSK2,C11orf52,C1S,C2CD4D,C6orf89,CD44,CD81,CDH11,CDH13,CDH2,CDYL2,CFH,CH25H,CLDN3,CLU,CNN1,COL12A1,COL13A1,COL16A1,COL1A1,COL1A2,COL3A1,COL4A1,COL4A2,COL5A1,COL5A2,COL6A1,COL6A2,COL6A3,COL9…	276
Cancer,Organismal Injury and Abnormalities	Breast or pancreatic cancer	1.68e-14		1.287	AASS,ABCA7,ABCC10,ACTA2,ADAM19,ADAMTS4,ADORA1,AEBP1,ALDH1L2,ALOX5,ANGPTL2,ANO10,ANPEP,ANXA9,APCDD1L,ARHGEF40,ARMC2,ATP10A,ATP10D,ATP2A1,ATP8B1,AZGP1,AZIN2,BAALC,BMP1,BNC1,BRSK2,C2CD4D,C6orf89,CAMK2N2,CD44,CD70,CDH11,CDH2,CDKN1B,CFH,CLDN3,CLU,CNN1,COL12A1,COL1A1,COL1A2,COL3A1,COL4A1,COL4A2,COL5A1,COL5A2,COL6A1,COL6A2,COL6A3,COLEC11,CP,CR2,CRABP2,CRYAB,CSF2RA,CSF3,CSPG4,CTH,CTSK,CYP26A1,DACT1,DCN,D…	218
Cancer,Organismal Injury and Abnormalities	Lymphoreticular neoplasm	3.5e-14		0.579	AASS,ABCA7,ADAM19,ADORA1,AGAP5 (includes others),ALDH1L2,ALOX5,ANGPTL2,ANGPTL4,ANPEP,ARSI,ATP10A,ATP8B1,B3GNT3,BAALC,BCL3,BMP1,CALR,CD151,CD44,CD70,CDH11,CDKN1B,CLMP,CLU,COL12A1,COL16A1,COL1A1,COL1A2,COL3A1,COL4A1,COL4A2,COL5A2,COL6A1,COL6A2,COL6A3,CP,CR2,CSF2RA,CSF3,CSPG4,CTSL,CYP26A1,DCN,DENND6A,DMBX1,DNAH2,DPT,DRD1,ECE1,EFEMP2,EGR2,ENG,EPHB1,EXT2,FAP,FGFR1,FN1,GABBR2,GAS6,GFAP,GFPT2,GJA1,GPX3,…	150
Cancer,Organismal Injury and Abnormalities	Frequency of tumor	5.4e-14		0.386	AASS,ABCC10,ACTA2,ADAM19,ADAMTS4,ADORA1,AEBP1,AGAP5 (includes others),AKR1B10,ALDH1L2,ALOX5,ANGPTL2,ANGPTL4,ANO10,ANPEP,ANTXR2,ANXA9,APBA2,APCDD1L,APLP2,ARHGEF40,ARMC2,ARSI,ATP10A,ATP10D,ATP2A1,ATP2A3,ATP6AP2,ATP8B1,AUTS2,AZGP1,B3GNT3,BCL3,BNC1,BRSK2,C1S,C6orf89,CACNB3,CALR,CD44,CD70,CDH11,CDH13,CDH2,CDKN1B,CDYL2,CEACAM1,CFH,CLDN3,CLU,CNN1,COL12A1,COL13A1,COL1A1,COL1A2,COL3A1,COL4A1,COL4A2,COL5A1…	303
Cancer,Organismal Injury and Abnormalities	Advanced stage tumor	5.42e-14		1.461	ACTA2,ADIRF,ALOX5,ANGPTL1,ANGPTL2,ANGPTL4,ANPEP,ANTXR2,ATP8B1,B4GAT1,BMP1,BNC1,CALR,CD151,CD44,CD81,CDH2,CDKN1B,CFH,CLDN3,CLU,CNN1,COL4A1,COL4A2,COL6A3,CRABP2,CRYAB,CSF2RA,CSF3,CYP26A1,EDNRA,ENG,FGF8,FGFR1,FN1,GJA1,HSP90B1,HTRA1,IGFBP5,IL15,IL17RA,IL18,INHBA,ITGB3,JAM2,KIT,MFAP5,MITF,MME,MMP1,MMP10,MMP14,MMP2,MMP3,MSC,MSX1,NCAM1,NEDD9,NID2,NRP1,NT5E,PCOLCE,PDCD1,PDGFRB,PECAM1,PRRX1,RAB11FIP4,ROBO…	82
Cancer,Organismal Injury and Abnormalities	Breast or colorectal cancer	5.71e-14		1.762	AASS,ABCC10,ACTA2,ADAM19,ADAMTS4,ADIRF,ADORA1,AEBP1,AGAP5 (includes others),AKR1B10,ALDH1L2,ALOX5,ANGPTL2,ANGPTL4,ANO10,ANPEP,ANTXR2,ANXA9,APBA2,APCDD1L,APLP2,ARHGEF40,ARSI,ATP10A,ATP10D,ATP2A1,ATP2A3,ATP6AP2,ATP8B1,AUTS2,AZIN2,B3GNT3,BCL3,BMP1,BRSK2,C2CD4D,C6orf89,CACNB3,CALR,CD44,CD70,CDH11,CDH13,CDH2,CDKN1B,CDYL2,CEACAM1,CFH,CLDN3,CLU,CNN1,COL12A1,COL1A1,COL1A2,COL3A1,COL4A1,COL4A2,COL5A1,COL5…	257
Cancer,Organismal Injury and Abnormalities	Head and neck carcinoma	6.12e-14			ABCA7,ABCC10,ACTA2,ACTG2,ADAM19,ADAMTS4,ADIRF,ADORA1,AEBP1,AGA,AGAP5 (includes others),ALDH1L2,ALOX5,ANGPTL2,ANGPTL4,ANKRD1,ANKRD2,ANO10,ANPEP,ANTXR2,ANXA9,APBA2,APCDD1L,APLP2,ARHGEF40,ARMC2,AS3MT,ATP10A,ATP10D,ATP2A1,ATP2A3,ATP6AP2,ATP8B1,AUTS2,AZGP1,AZIN2,B3GNT3,BAALC,BCL3,BMP1,BRSK2,C1S,C2CD4D,C6orf89,CACNB3,CALR,CAMK2N2,CD44,CD70,CD81,CDH11,CDH13,CDH2,CDKN1B,CDYL2,CELF5,CFH,CH25H,CLDN3,CLMP,C…	346
Cancer,Organismal Injury and Abnormalities	Visceral metastasis	6.88e-14		0.758	ACTA2,ADIRF,ALOX5,ANGPTL2,ANGPTL4,ANPEP,CD151,CD44,CDH2,CDKN1B,CLDN3,CLU,COL4A1,COL4A2,COL6A3,CRABP2,CSF3,FGF8,FGFR1,HSP90B1,HTRA1,IGFBP5,IL15,IL18,ITGB3,KIT,MME,MMP2,MMP3,MSC,MSX1,NID2,NT5E,PCOLCE,PDCD1,PDGFRB,PRRX1,RAB11FIP4,S100P,SERPINE1,TNFRSF11B,TUBA1A,WLS,WNT5A	44
Cancer,Organismal Injury and Abnormalities	Melanoma	7.07e-14		-0.148	A4GALT,ABCA7,ABCC10,ADAM19,ADAMTS4,ADORA1,AEBP1,AGA,AGAP5 (includes others),AKR1B10,ALDH1L2,ALOX5,ANGPTL1,ANO10,ANPEP,ANTXR2,ANXA9,APBA2,APCDD1L,APLP2,APOL6,ARMC2,ARSI,ATP10A,ATP10D,ATP2A1,ATP2A3,ATP6AP2,ATP8B1,AUTS2,AZGP1,BMP1,BNC1,BRSK2,C1S,C2CD4D,C6orf89,CACNB3,CD44,CD81,CDH11,CDH13,CDH2,CDKN1B,CDYL2,CEACAM1,CELF5,CFH,CH25H,CLU,CNN1,COL12A1,COL13A1,COL16A1,COL1A1,COL1A2,COL3A1,COL4A1,COL4A2,CO…	293
Cancer,Organismal Injury and Abnormalities	Advanced malignant tumor	1.32e-13		1.461	ACTA2,ADIRF,ALOX5,ANGPTL1,ANGPTL2,ANGPTL4,ANPEP,ANTXR2,ATP8B1,B4GAT1,BNC1,CALR,CD151,CD44,CD81,CDH2,CDKN1B,CFH,CLDN3,CLU,CNN1,COL4A1,COL4A2,COL6A3,CRABP2,CRYAB,CSF2RA,CSF3,CYP26A1,EDNRA,ENG,FGF8,FGFR1,FN1,GJA1,HSP90B1,HTRA1,IGFBP5,IL15,IL17RA,IL18,INHBA,ITGB3,JAM2,KIT,MFAP5,MITF,MME,MMP1,MMP10,MMP14,MMP2,MMP3,MSC,MSX1,NCAM1,NEDD9,NID2,NRP1,NT5E,PCOLCE,PDCD1,PDGFRB,PECAM1,PRRX1,RAB11FIP4,ROBO1,S10…	81
Cancer,Organismal Injury and Abnormalities	Development of malignant tumor	1.47e-13		0.69	AASS,ABCC10,ACTA2,ADAM19,ADAMTS4,ADORA1,AEBP1,AGAP5 (includes others),AKR1B10,ALDH1L2,ALOX5,ANGPTL2,ANGPTL4,ANO10,ANPEP,ANTXR2,ANXA9,APBA2,APCDD1L,APLP2,ARHGEF40,ARMC2,ARSI,ATP10A,ATP10D,ATP2A1,ATP2A3,ATP6AP2,ATP8B1,AUTS2,AZGP1,B3GNT3,BCL3,BNC1,BRSK2,C1S,C6orf89,CACNB3,CD44,CD70,CDH11,CDH13,CDH2,CDKN1B,CDYL2,CEACAM1,CFH,CLDN3,CLU,CNN1,COL12A1,COL13A1,COL1A1,COL1A2,COL3A1,COL4A1,COL4A2,COL5A1,COL5…	298
Cancer,Organismal Injury and Abnormalities	Neck neoplasm	1.58e-13			ABCA7,ABCC10,ACTA2,ACTG2,ADAM19,ADAMTS4,ADIRF,ADORA1,AEBP1,AGA,AGAP5 (includes others),ALDH1L2,ALOX5,ANGPTL2,ANGPTL4,ANKRD1,ANKRD2,ANO10,ANPEP,ANTXR2,ANXA9,APBA2,APCDD1L,APLP2,ARHGEF40,ARMC2,AS3MT,ATP10A,ATP10D,ATP2A1,ATP2A3,ATP6AP2,ATP8B1,AUTS2,AZGP1,B3GNT3,BAALC,BCL3,BMP1,BRSK2,C1S,C2CD4D,C6orf89,CACNB3,CALR,CAMK2N2,CD44,CD70,CD81,CDH11,CDH13,CDH2,CDKN1B,CDYL2,CELF5,CFH,CH25H,CLDN3,CLMP,CLU,CNN…	335
Cancer,Organismal Injury and Abnormalities	Fibroma	2.12e-13			ANTXR2,COL12A1,COL13A1,COL16A1,COL1A1,COL1A2,COL3A1,COL4A1,COL4A2,COL5A1,COL5A2,COL6A1,COL6A2,COL6A3,COL9A2,FGFR1,KIT,NRP1,PDGFRB,SERPINE1,TUBA1A	21
Cancer,Organismal Injury and Abnormalities	Secondary tumor	2.29e-13		1.461	ACTA2,ADIRF,ALOX5,ANGPTL1,ANGPTL2,ANGPTL4,ANPEP,ANTXR2,B4GAT1,CALR,CD151,CD44,CD81,CDH2,CDKN1B,CLDN3,CLU,CNN1,COL4A1,COL4A2,COL6A3,CRABP2,CRYAB,CSF2RA,CSF3,CYP26A1,EDNRA,ENG,FGF8,FGFR1,FN1,GJA1,HSP90B1,HTRA1,IGFBP5,IL15,IL17RA,IL18,INHBA,ITGB3,JAM2,KIT,MITF,MME,MMP1,MMP10,MMP14,MMP2,MMP3,MSC,MSX1,NCAM1,NEDD9,NID2,NRP1,NT5E,PCOLCE,PDCD1,PDGFRB,PECAM1,PRRX1,RAB11FIP4,ROBO1,S100P,SERPINB2,SERPINE1,S…	76
Cancer,Organismal Injury and Abnormalities	Fibrous tissue tumor	2.62e-13			ANTXR2,CD44,COL12A1,COL13A1,COL16A1,COL1A1,COL1A2,COL3A1,COL4A1,COL4A2,COL5A1,COL5A2,COL6A1,COL6A2,COL6A3,COL9A2,FGFR1,IL18,KIT,NRP1,NT5E,PDCD1,PDGFRB,SERPINE1,TUBA1A	25
Cancer,Organismal Injury and Abnormalities	Growth of tumor	3.67e-11	Increased	2.071	AKR1B10,ALOX5,ANGPTL4,ANPEP,CALR,CD151,CD44,CD70,CDKN1B,CEACAM1,CLU,COL4A1,CRABP2,CSF2RA,CSF3,CSPG4,CTSK,CYGB,DCN,EFEMP2,ENG,FAP,FBLN5,FGF8,FGFR1,FN1,GAS6,GJA1,GPC1,GREM1,HSPA5,IGFBP5,IL13RA2,IL15,IL17RA,IL18,IL1R1,INHBA,ITGA5,ITGB3,KIT,MME,MMP1,MMP14,MMP2,MMP3,NEDD9,NRP1,NT5E,OLR1,P4HA2,PDCD1,SELPLG,SERPINE1,SERPINF1,SPARC,SPHK1,TCF4,TIMP3,TMEM173,TNFRSF11B,TNFRSF1A,TNFRSF9,UCHL1,VCAN,WNT5A,WNT7A	67
Cancer,Organismal Injury and Abnormalities	Advanced extracranial solid tumor	1.14e-12		0.837	ACTA2,ADIRF,ALOX5,ANGPTL2,ANGPTL4,ANPEP,ATP8B1,BNC1,CD151,CD44,CDH2,CDKN1B,CFH,CLDN3,CLU,COL4A1,COL4A2,COL6A3,CRABP2,CSF3,ENG,FGF8,FGFR1,FN1,HSP90B1,HTRA1,IGFBP5,IL15,IL18,ITGB3,KIT,MFAP5,MME,MMP14,MMP2,MMP3,MSC,MSX1,NID2,NT5E,PCOLCE,PDCD1,PDGFRB,PRRX1,RAB11FIP4,S100P,SERPINE1,SERPINE2,TNFRSF11B,TUBA1A,VCAN,WLS,WNT5A	53
Cancer,Organismal Injury and Abnormalities	Subcutaneous tumor	1.77e-12			ANTXR2,CFH,COL12A1,COL13A1,COL16A1,COL1A1,COL1A2,COL3A1,COL4A1,COL4A2,COL5A1,COL5A2,COL6A1,COL6A2,COL6A3,COL9A2,CRABP2,DPT,FGFR1,IFIT1,IFIT3,IGFBP5,KIT,LTBP1,MMP11,MMP2,NRP1,OXTR,PDGFRB,PKIA,PPARA,SERPINE1,SPSB1,TUBA1A,VCAN,WNT5B,WNT7A,XAF1	38
Cancer,Organismal Injury and Abnormalities	Tumorigenesis of epithelial neoplasm	2.77e-12		0.827	AASS,ABCC10,ACTA2,ADAM19,ADAMTS4,ADORA1,AEBP1,AGAP5 (includes others),AKR1B10,ALDH1L2,ALOX5,ANGPTL2,ANGPTL4,ANO10,ANPEP,ANTXR2,ANXA9,APBA2,APCDD1L,APLP2,ARHGEF40,ARMC2,ARSI,ATP10A,ATP10D,ATP2A1,ATP2A3,ATP6AP2,ATP8B1,AUTS2,AZGP1,B3GNT3,BCL3,BNC1,BRSK2,C1S,C6orf89,CACNB3,CALR,CD44,CD70,CDH11,CDH13,CDH2,CDKN1B,CDYL2,CEACAM1,CFH,CLDN3,CLU,COL12A1,COL13A1,COL1A1,COL1A2,COL3A1,COL4A1,COL4A2,COL5A1,COL5…	294
Cancer,Organismal Injury and Abnormalities	Genitourinary adenocarcinoma	3.5e-12			AASS,ACTA2,ACTG2,ADAM19,ADAMTS4,ADORA1,AEBP1,AGAP5 (includes others),ALDH1L2,ALOX5,ANGPTL1,ANKRD1,ANPEP,ANXA9,APBA2,ARHGEF40,ATP10A,ATP10D,ATP2A1,ATP2A3,ATP8B1,AZGP1,B3GNT3,BNC1,BRSK2,C1S,C6orf89,CACNB3,CD44,CD70,CDH11,CDH13,CDH2,CDKN1B,CDYL2,CEACAM1,CFH,CLDN3,CLU,CNN1,COL12A1,COL13A1,COL1A1,COL1A2,COL3A1,COL4A1,COL4A2,COL5A1,COL5A2,COL6A2,COL6A3,COLEC11,CP,CPD,CPED1,CR2,CRABP2,CSF2RA,CSPG4,CTH,C…	244
Cancer,Organismal Injury and Abnormalities	Benign connective or soft tissue neoplasm	4.08e-12			ANTXR2,CFH,COL12A1,COL13A1,COL16A1,COL1A1,COL1A2,COL3A1,COL4A1,COL4A2,COL5A1,COL5A2,COL6A1,COL6A2,COL6A3,COL9A2,CRABP2,DPT,FGFR1,IFIT1,IFIT3,IGFBP5,KIT,LTBP1,MMP11,MMP2,NRP1,OXTR,PDGFRB,PKIA,PPARA,SERPINE1,SPSB1,TUBA1A,VCAN,WNT5B,WNT7A,XAF1	38
Cancer,Organismal Injury and Abnormalities	Development of carcinoma	5.61e-12		1.075	AASS,ABCC10,ACTA2,ADAM19,ADAMTS4,ADORA1,AEBP1,AGAP5 (includes others),AKR1B10,ALDH1L2,ALOX5,ANGPTL2,ANGPTL4,ANO10,ANPEP,ANTXR2,ANXA9,APBA2,APCDD1L,APLP2,ARHGEF40,ARMC2,ARSI,ATP10A,ATP10D,ATP2A1,ATP2A3,ATP6AP2,ATP8B1,AUTS2,AZGP1,B3GNT3,BCL3,BNC1,BRSK2,C1S,C6orf89,CACNB3,CD44,CD70,CDH11,CDH13,CDH2,CDKN1B,CDYL2,CEACAM1,CFH,CLDN3,CLU,COL12A1,COL13A1,COL1A1,COL1A2,COL3A1,COL4A1,COL4A2,COL5A1,COL5A2,CO…	290
Cancer,Organismal Injury and Abnormalities	Advanced malignant solid tumor	8.85e-12		1.124	ACTA2,ADIRF,ALOX5,ANGPTL2,ANGPTL4,ANPEP,ATP8B1,BNC1,CALR,CD151,CD44,CDH2,CDKN1B,CFH,CLDN3,CLU,COL4A1,COL4A2,COL6A3,CRABP2,CSF2RA,CSF3,ENG,FGF8,FGFR1,FN1,HSP90B1,HTRA1,IGFBP5,IL15,IL18,ITGB3,KIT,MFAP5,MITF,MME,MMP1,MMP14,MMP2,MMP3,MSC,MSX1,NCAM1,NID2,NT5E,PCOLCE,PDCD1,PDGFRB,PRRX1,RAB11FIP4,S100P,SERPINE1,SERPINE2,TNFRSF11B,TNFRSF1A,TUBA1A,VCAN,WLS,WNT5A	59
Cancer,Organismal Injury and Abnormalities	Thoracic neoplasm	1.7e-11		0.484	ABCC10,ACTA2,ADAM19,ADORA1,AGAP5 (includes others),AKR1B10,ALOX5,ANGPTL1,ANGPTL2,ANGPTL4,ANPEP,ANTXR2,ANXA9,APLP2,ARSI,ATP10A,C11orf52,CD151,CD44,CDH13,CDKN1B,CEACAM1,CFH,CLDN3,CLU,COL12A1,COL13A1,COL1A1,COL3A1,COL4A1,COL5A1,COL6A3,CPD,CR2,CRYAB,CSF3,CSPG4,CTH,CTTNBP2NL,CYGB,CYP26A1,DCN,DEGS1,DNAH2,DPT,DRD1,EPHB1,FAM171B,FAP,FBLN5,FGF8,FGFR1,FMO3,FN1,FOXO4,GGN,GIPR,GLT8D2,GPX3,HEPH,HSP90B1,HTRA1,…	135
Cancer,Organismal Injury and Abnormalities	Malignant neoplasm of aerodigestive tract	4.65e-11			ABCA7,ADAM19,ADORA1,AGAP5 (includes others),ALDH1L2,ALOX5,ANPEP,APCDD1L,APLP2,ARHGEF40,AS3MT,ATP10A,ATP10D,ATP6AP2,AUTS2,AZIN2,BAALC,CD44,CDH11,CDH13,CDH2,CDKN1B,CDYL2,CLU,CNN1,COL12A1,COL1A1,COL1A2,COL4A1,COL4A2,COL5A1,COL6A2,COLEC11,CRYAB,CTCFL,CTH,DCN,DPT,DZIP1L,ENG,FAM171B,FGF8,FGFR1,FN1,FZD4,GAS6,GRK5,HAS2,HS3ST3A1,HSP90B1,HTRA1,IFIT2,IGFBP5,IL7R,INHBA,IRF2,KIT,KRT81,LTBP1,LYST,MEX3C,MFAP4,M…	116
Cancer,Organismal Injury and Abnormalities	Squamous-cell carcinoma	1.31e-10		1.007	ABCA7,ACTA2,ADAM19,ADORA1,AGAP5 (includes others),ALOX5,ANGPTL2,ANPEP,APBA2,APLP2,AS3MT,ATP10A,ATP10D,ATP2A1,AUTS2,AZIN2,C2CD4D,CD44,CD70,CD81,CDH11,CDH13,CDH2,CDKN1B,CDYL2,CLU,CNN1,COL12A1,COL1A1,COL1A2,COL4A1,COL4A2,COL5A1,COL6A2,COL6A3,CR2,CSPG4,CTCFL,CTH,CTSL,CYP26A1,DCN,DNAH2,DPT,DZIP1L,ECM1,EMILIN1,ENG,FAM171B,FAP,FBLN5,FGFR1,FN1,GAS6,GGN,GGT7,GJA1,GP6,GPX2,GPX3,GRK5,HAS2,HEPH,HS3ST3A1,HSP9…	155
Cancer,Organismal Injury and Abnormalities	Pelvic adenocarcinoma	1.31e-10			AASS,ACTG2,ADAM19,ADAMTS4,ADORA1,AEBP1,AGAP5 (includes others),ALDH1L2,ALOX5,ANGPTL1,ANKRD1,ANPEP,ANXA9,APBA2,ARHGEF40,ATP10A,ATP10D,ATP2A1,ATP2A3,ATP8B1,AZGP1,B3GNT3,BNC1,BRSK2,C1S,C6orf89,CACNB3,CD44,CD70,CDH11,CDH13,CDH2,CDKN1B,CDYL2,CEACAM1,CFH,CLDN3,CLU,CNN1,COL12A1,COL13A1,COL1A1,COL1A2,COL3A1,COL4A1,COL4A2,COL5A1,COL5A2,COL6A2,COL6A3,COLEC11,CP,CPD,CPED1,CR2,CRABP2,CSF2RA,CSPG4,CTH,DACT1,D…	221
Cancer,Organismal Injury and Abnormalities	Invasion of tissue	9.31e-09	Increased	2.292	ANPEP,CD151,CD44,FN1,HAS2,IGFBP5,INHBA,MITF,MMP1,MMP11,MMP14,MMP2,MMP3,MRAS,NCAM1,NEDD9,NRP1,SERPINE1,SP100,TGFB1I1,TIMP3	21
Cancer,Organismal Injury and Abnormalities	Metastatic solid tumor	1.46e-10		1.124	ACTA2,ADIRF,ALOX5,ANGPTL2,ANGPTL4,ANPEP,CALR,CD151,CD44,CDH2,CDKN1B,CLDN3,CLU,COL4A1,COL4A2,COL6A3,CRABP2,CSF2RA,CSF3,FGF8,FGFR1,FN1,HSP90B1,HTRA1,IGFBP5,IL15,IL18,ITGB3,KIT,MITF,MME,MMP1,MMP14,MMP2,MMP3,MSC,MSX1,NCAM1,NID2,NT5E,PCOLCE,PDCD1,PDGFRB,PRRX1,RAB11FIP4,S100P,SERPINE1,TNFRSF11B,TNFRSF1A,TUBA1A,WLS,WNT5A	52
Cancer,Organismal Injury and Abnormalities	Metastasis of cells	8.5e-08	Increased	2.331	ALOX5,ANGPTL1,ANGPTL4,ANTXR2,CD151,CD44,CDH2,CDKN1B,CNN1,COL4A1,COL4A2,CRYAB,CSF3,CYP26A1,FN1,HTRA1,IL18,INHBA,MMP1,MMP10,MMP2,MMP3,NEDD9,NID2,NT5E,SERPINE1,SERPINF1,THY1,WNT5A	29
Cancer,Organismal Injury and Abnormalities	Serous adenocarcinoma	3.68e-10			ACTG2,AEBP1,ALDH1L2,ATP8B1,AZGP1,B3GNT3,BNC1,C6orf89,CDH11,CDH13,CDKN1B,CFH,CLDN3,CLU,CNN1,COL3A1,COL5A1,COL6A2,CP,CSPG4,DNAH2,DPT,EDNRA,EMILIN1,FBLN5,FN1,FOXO4,GPX3,HAS2,HEPH,HSP90B1,IGFBP5,IL18,KIT,KRT34,KRT81,KRT86,MFAP4,MFAP5,NUCB1,PDCD1,PDGFRB,PI3,PKD2,RAET1G,SEC16B,SERINC2,SIK2,SMG6,SORCS2,SPOCK2,TGFB1I1,TIMP3,TNFRSF9,TNXB,TSHZ3,TUBA1A,UCHL1,VCAN,WNT7A,ZNF214	61
Cancer,Organismal Injury and Abnormalities	Metastasis of tumor cell lines	7.72e-08	Increased	2.349	ALOX5,ANGPTL1,ANGPTL4,ANTXR2,CD151,CD44,CDH2,CDKN1B,CNN1,COL4A1,COL4A2,CRYAB,CSF3,CYP26A1,FN1,HTRA1,IL18,INHBA,MMP1,MMP10,MMP3,NEDD9,NT5E,SERPINF1,THY1,WNT5A	26
Cancer,Organismal Injury and Abnormalities	Cancer of cells	2.67e-16	Increased	2.476	AASS,ABCA7,ACTA2,ADAM19,ADORA1,AGAP5 (includes others),ALDH1L2,ALOX5,ANGPTL1,ANGPTL2,ANGPTL4,ANPEP,ANTXR2,APBA2,APLP2,AS3MT,ATP10A,ATP10D,ATP2A1,AUTS2,AZIN2,B3GNT3,BCL3,C2CD4D,CACNB3,CD151,CD44,CD70,CD81,CDH11,CDH13,CDH2,CDKN1B,CDYL2,CLMP,CLU,CNN1,COL12A1,COL1A1,COL1A2,COL3A1,COL4A1,COL4A2,COL5A1,COL6A1,COL6A2,COL6A3,CPD,CR2,CRYAB,CSF2RA,CSF3,CSPG4,CTCFL,CTH,CTSK,CTSL,CYP26A1,DCN,DENND6A,DMBX1,DN…	215
Cancer,Organismal Injury and Abnormalities	Upper aerodigestive tract carcinoma	2.09e-09			ABCA7,ADAM19,ADORA1,AGAP5 (includes others),ALDH1L2,ALOX5,ANPEP,APCDD1L,APLP2,ARHGEF40,AS3MT,ATP10A,ATP10D,ATP6AP2,AUTS2,AZIN2,BAALC,CD44,CDH11,CDH13,CDH2,CDYL2,CLU,CNN1,COL12A1,COL1A1,COL1A2,COL4A1,COL4A2,COL5A1,COL6A2,COLEC11,CRYAB,CTCFL,CTH,DCN,DPT,DZIP1L,ENG,FAM171B,FGFR1,FN1,GAS6,GRK5,HAS2,HS3ST3A1,HSP90B1,HTRA1,IGFBP5,IL7R,INHBA,IRF2,KIT,KRT81,LTBP1,LYST,MEX3C,MFAP4,MFAP5,MFSD2A,MMP10,MMP11…	109
Cancer,Organismal Injury and Abnormalities	Extraadrenal retroperitoneal tumor	4.08e-09		-1.103	ABCA7,ABCC10,ADAM19,ADORA1,ANPEP,APCDD1L,ARMC2,ATP10A,ATP10D,ATP2A1,ATP8B1,AZGP1,BAALC,BRSK2,C1S,CD44,CD70,CDH11,CDH2,CDKN1B,CFH,CLU,COL12A1,COL1A1,COL1A2,COL4A1,COL5A1,COL6A1,COL6A3,COLEC11,CR2,CSF2RA,CSPG4,CTH,CTSK,CTSL,DCN,DENND6A,DNAH2,DZIP1L,EFEMP2,EHD3,ENG,EPHB1,FAP,FBLN5,FGFR1,FN1,GAS6,GIPR,GJA1,GPC1,GPX3,GRAP2,HEPH,HS3ST3A1,HSP90B1,IFIT3,IGFBP5,IL13RA2,IL15,IL17RA,IL18,IL1R1,IRF2,ITGA2B,I…	155
Cancer,Organismal Injury and Abnormalities	Papillary adenocarcinoma	5.29e-09			ANPEP,ATP8B1,BNC1,CD44,CD70,CFH,CLU,DCN,ENG,FBLN5,FGFR1,FN1,GABBR2,GPX3,HSP90B1,ITGA5,KIT,MFAP5,MMP2,MT1E,PAMR1,PCDHGA12,PDGFRB,SERINC2,SERPINF1,SPHK1,TIMP3,TLE3,TPM2,TUBA1A,WNT5A	31
Cancer,Organismal Injury and Abnormalities	Malignant neoplasm of retroperitoneum	6.92e-09			ABCA7,ABCC10,ADAM19,ADORA1,ANPEP,APCDD1L,ARMC2,ATP10A,ATP10D,ATP2A1,AZGP1,BAALC,BRSK2,C1S,CD44,CD70,CDH11,CDH2,CDKN1B,CLU,COL12A1,COL1A1,COL1A2,COL4A1,COL5A1,COL6A1,COL6A3,COLEC11,CR2,CSF2RA,CSPG4,CTH,CTSK,CTSL,DCN,DENND6A,DNAH2,DZIP1L,EFEMP2,EHD3,ENG,EPHB1,FAP,FBLN5,FGFR1,FN1,GAS6,GIPR,GJA1,GPX3,GRAP2,HEPH,HS3ST3A1,HSP90B1,IFIT3,IGFBP5,IL15,IL17RA,IL18,IL1R1,IRF2,ITGA2B,ITGA5,ITGB3,ITPR2,ITPRIP,…	143
Cancer,Organismal Injury and Abnormalities	Neoplasia of tumor cell lines	2.9e-07	Increased	2.853	ALOX5,ANGPTL1,ANGPTL4,ANTXR2,CAMK2N2,CD151,CD44,CDH2,CDKN1B,CEACAM1,CNN1,COL4A1,COL4A2,CRYAB,CSF3,CYP26A1,FBLN5,FN1,GJA1,HAS2,HTRA1,IL18,INHBA,MMP1,MMP10,MMP3,NEDD9,NT5E,SERPINF1,THY1,TIMP3,WNT5A	32
Cancer,Organismal Injury and Abnormalities	Invasive cancer	2.59e-07			ACTA2,ADAMTS4,ANPEP,CD44,CLU,CNN1,COL1A2,CSF2RA,DACT1,DCN,FAP,FBLN5,FGFR1,FN1,GPX3,GREM1,HSP90B1,IER3,ITPR2,KIT,MMP14,MMP2,MT1E,PAMR1,PDCD1,PDGFRB,SERPINE1,TAGLN,TLE3,TMEM158,TPM2,TUBA1A	32
Cancer,Organismal Injury and Abnormalities	Invasive carcinoma	3.98e-07			ACTA2,ADAMTS4,ANPEP,CD44,CLU,CNN1,COL1A2,DACT1,DCN,FAP,FBLN5,FGFR1,FN1,GPX3,GREM1,HSP90B1,IER3,KIT,MMP14,MMP2,MT1E,PAMR1,PDCD1,PDGFRB,TAGLN,TLE3,TMEM158,TPM2,TUBA1A	29
Cancer,Organismal Injury and Abnormalities	Angiogenesis of tumor	4.56e-07		0.088	ANGPTL1,ANGPTL2,ANGPTL4,CD44,COL4A1,GPC1,IL18,ITGB3,MMP1,MMP14,MMP2,MMP3,NRP1,SERPINE1,TIMP3	15
Cancer,Organismal Injury and Abnormalities	Neoplasia of cells	4.07e-18	Increased	3.012	AASS,ABCA7,ACTA2,ADAM19,ADORA1,AGAP5 (includes others),ALDH1L2,ALOX5,ANGPTL1,ANGPTL2,ANGPTL4,ANPEP,ANTXR2,APBA2,APLP2,ARSI,AS3MT,ATP10A,ATP10D,ATP2A1,ATP8B1,AUTS2,AZIN2,B3GNT3,BAALC,BCL3,BMP1,C2CD4D,CACNB3,CALR,CAMK2N2,CD151,CD44,CD70,CD81,CDH11,CDH13,CDH2,CDKN1B,CDYL2,CEACAM1,CLMP,CLU,CNN1,COL12A1,COL16A1,COL1A1,COL1A2,COL3A1,COL4A1,COL4A2,COL5A1,COL5A2,COL6A1,COL6A2,COL6A3,CP,CPD,CR2,CRYAB,CSF2…	249
Cancer,Organismal Injury and Abnormalities,Renal and Urological Disease	Urinary tract tumor	1.07e-07			ADAM19,ADORA1,AEBP1,ANGPTL2,ANPEP,ATP10D,ATP2A1,ATP8B1,AUTS2,BMP1,C1S,CALR,CD44,CD70,CDKN1B,CELF5,CFH,CH25H,CLU,COL12A1,COL1A2,COL6A2,COL6A3,CPED1,CSF2RA,CSPG4,CTSK,CTSL,DACT1,DCN,DZIP1L,ECM1,EHD3,EMILIN1,ENG,FAP,FBLN5,FGFR1,FN1,GAS6,GBX2,GIPR,GJA1,GPX3,HSP90B1,IFIT3,IGFBP5,IL15,IL17RA,IL18,IL1R1,ITGA2B,ITGA5,ITGB3,ITPR2,KIT,LTBP2,LYST,MITF,MME,MMP11,MMP2,MT1E,NPAS3,NUCB1,PAMR1,PCDHGA12,PDCD1,PDG…	104
Cancer,Organismal Injury and Abnormalities,Renal and Urological Disease	Urinary tract cancer	1.15e-07			ADAM19,ADORA1,AEBP1,ANGPTL2,ANPEP,ATP10D,ATP2A1,ATP8B1,AUTS2,BMP1,C1S,CALR,CD44,CD70,CDKN1B,CELF5,CFH,CH25H,CLU,COL12A1,COL1A2,COL6A2,COL6A3,CPED1,CSF2RA,CSPG4,CTSK,CTSL,DACT1,DCN,DZIP1L,ECM1,EHD3,EMILIN1,ENG,FAP,FBLN5,FGFR1,FN1,GAS6,GBX2,GIPR,GJA1,GPX3,HSP90B1,IFIT3,IGFBP5,IL15,IL17RA,IL18,IL1R1,ITGA2B,ITGA5,ITGB3,ITPR2,KIT,LTBP2,LYST,MITF,MME,MMP11,MMP2,MT1E,NPAS3,NUCB1,PAMR1,PCDHGA12,PDCD1,PDG…	102
Cancer,Organismal Injury and Abnormalities,Reproductive System Disease	Genital tumor	1.42e-17		0.156	AASS,ABCC10,ACTG2,ADAM19,ADAMTS4,ADORA1,AEBP1,AGAP5 (includes others),ALDH1L2,ALOX5,ANGPTL1,ANKRD1,ANPEP,ANTXR2,ANXA9,APBA2,ARHGEF40,ATP10A,ATP10D,ATP2A1,ATP2A3,ATP6AP2,ATP8B1,AZGP1,B3GNT3,B4GAT1,BNC1,BRSK2,C11orf52,C1S,C6orf89,CACNB3,CAMK2N2,CD44,CD70,CDH11,CDH13,CDH2,CDKN1B,CDYL2,CEACAM1,CFH,CLDN3,CLU,CNN1,COL12A1,COL13A1,COL1A1,COL1A2,COL3A1,COL4A1,COL4A2,COL5A1,COL5A2,COL6A2,COL6A3,COLEC11,CP…	275
Cancer,Organismal Injury and Abnormalities,Reproductive System Disease	Genital tract cancer	2.39e-16			AASS,ABCC10,ACTG2,ADAM19,ADAMTS4,ADORA1,AEBP1,AGAP5 (includes others),ALDH1L2,ALOX5,ANGPTL1,ANKRD1,ANPEP,ANTXR2,ANXA9,APBA2,ARHGEF40,ATP10A,ATP10D,ATP2A1,ATP2A3,ATP6AP2,ATP8B1,AZGP1,B3GNT3,BNC1,BRSK2,C11orf52,C1S,C6orf89,CACNB3,CAMK2N2,CD44,CD70,CDH11,CDH13,CDH2,CDKN1B,CDYL2,CEACAM1,CFH,CLDN3,CLU,CNN1,COL12A1,COL13A1,COL1A1,COL1A2,COL3A1,COL4A1,COL4A2,COL5A1,COL5A2,COL6A2,COL6A3,COLEC11,CP,CPD,CP…	268
Cancer,Organismal Injury and Abnormalities,Reproductive System Disease	Breast or gynecological cancer	5.91e-15		1.709	AASS,ABCC10,ACTA2,ACTG2,ADAM19,ADAMTS4,ADORA1,AEBP1,AGAP5 (includes others),ALDH1L2,ALOX5,ANGPTL2,ANO10,ANPEP,ANTXR2,ANXA9,APBA2,ARHGEF40,ATP10A,ATP10D,ATP2A1,ATP2A3,ATP6AP2,ATP8B1,AZGP1,AZIN2,B3GNT3,BMP1,BNC1,C1S,C2CD4D,C6orf89,CAMK2N2,CD44,CD70,CDH11,CDH13,CDH2,CDKN1B,CFH,CLDN3,CLU,CNN1,COL12A1,COL13A1,COL1A1,COL1A2,COL3A1,COL4A1,COL4A2,COL5A1,COL5A2,COL6A1,COL6A2,COL6A3,COLEC11,CP,CPED1,CRABP2…	239
Cancer,Organismal Injury and Abnormalities,Reproductive System Disease	Mammary tumor	3.6e-11	Increased	2.054	ACTA2,ADAMTS4,ALOX5,ANGPTL2,ANO10,ANPEP,ANXA9,ARHGEF40,ATP10A,ATP10D,ATP2A1,AZIN2,BMP1,C2CD4D,CD151,CD44,CD70,CDH11,CDH2,CDKN1B,CLDN3,CLU,CNN1,COL12A1,COL1A1,COL1A2,COL4A2,COL5A2,COL6A1,CP,CRABP2,CRYAB,CSF2RA,CSF3,CSPG4,CTSK,CYP26A1,DACT1,DCN,DZIP1L,ECE1,ECM1,EFEMP2,EMILIN1,ENG,FAP,FBLN5,FGF8,FGFR1,FN1,GAS6,GFPT2,GJA1,GPX3,GREM1,HSP90B1,HSPA5,HTRA1,IER3,IFIT1,IGFBP5,IL18,ITGA5,ITGB3,ITPR2,JUNB,KI…	127
Cancer,Organismal Injury and Abnormalities,Reproductive System Disease	Female genital tract serous carcinoma	1.11e-14			ACTG2,AEBP1,ATP8B1,B3GNT3,BNC1,CDH11,CDH13,CDKN1B,CFH,CLDN3,CLU,CNN1,COL3A1,COL5A1,COL6A2,CP,CSPG4,DPT,EDNRA,EMILIN1,FBLN5,GPX3,HEPH,HSP90B1,IGFBP5,IL18,KIT,KRT34,KRT81,MFAP4,MFAP5,PDCD1,PI3,RAET1G,SPOCK2,TGFB1I1,TIMP3,TNXB,TSHZ3,TUBA1A,UCHL1,VCAN,WNT7A	43
Cancer,Organismal Injury and Abnormalities,Reproductive System Disease	Breast or ovarian cancer	2.23e-14		1.709	AASS,ACTA2,ADAM19,ADAMTS4,ADORA1,AEBP1,ALDH1L2,ALOX5,ANGPTL2,ANO10,ANPEP,ANXA9,ARHGEF40,ATP10A,ATP10D,ATP2A1,ATP8B1,AZGP1,AZIN2,BMP1,BNC1,C2CD4D,C6orf89,CAMK2N2,CD44,CD70,CDH11,CDH2,CDKN1B,CFH,CLDN3,CLU,CNN1,COL12A1,COL1A1,COL1A2,COL3A1,COL4A1,COL4A2,COL5A1,COL5A2,COL6A1,COL6A2,COL6A3,CP,CRABP2,CRYAB,CSF2RA,CSF3,CSPG4,CTSK,CYP26A1,DACT1,DCN,DMBX1,DNAH2,DZIP1L,ECE1,ECM1,EFEMP2,EGR2,EMILIN1,ENG,FAP…	173
Cancer,Organismal Injury and Abnormalities,Reproductive System Disease	Tumorigenesis of reproductive tract	4.77e-12		-0.126	AASS,ABCC10,ACTG2,ADAM19,ADORA1,AEBP1,AGAP5 (includes others),ALDH1L2,ALOX5,ANPEP,ANTXR2,APBA2,ARHGEF40,ATP10A,ATP10D,ATP2A1,ATP2A3,ATP6AP2,ATP8B1,AZGP1,B3GNT3,BNC1,C1S,C6orf89,CAMK2N2,CD44,CDH11,CDH13,CDH2,CDKN1B,CFH,CLDN3,CLU,CNN1,COL12A1,COL13A1,COL1A2,COL3A1,COL4A1,COL4A2,COL5A1,COL6A2,COL6A3,COLEC11,CP,CPED1,CRABP2,CSF3,CSPG4,CTH,CTSL,DACT1,DCN,DMBX1,DNAH2,DPP9,DPT,DZIP1L,ECE1,EDNRA,EGR2,EMI…	197
Cancer,Organismal Injury and Abnormalities,Reproductive System Disease	Female genital neoplasm	5.81e-12		-0.126	AASS,ABCC10,ACTG2,ADAM19,ADORA1,AEBP1,AGAP5 (includes others),ALDH1L2,ALOX5,ANPEP,ANTXR2,APBA2,ARHGEF40,ATP10A,ATP10D,ATP2A1,ATP2A3,ATP6AP2,ATP8B1,AZGP1,B3GNT3,BNC1,C1S,C6orf89,CAMK2N2,CD44,CDH11,CDH13,CDH2,CDKN1B,CFH,CLDN3,CLU,CNN1,COL12A1,COL13A1,COL1A2,COL3A1,COL4A1,COL4A2,COL5A1,COL6A2,COL6A3,COLEC11,CP,CPED1,CRABP2,CSF3,CSPG4,CTH,CTSL,DACT1,DCN,DMBX1,DNAH2,DPP9,DPT,DZIP1L,ECE1,EDNRA,EGR2,EMI…	197
Cancer,Organismal Injury and Abnormalities,Reproductive System Disease	Breast cancer	6.67e-12		1.709	ACTA2,ADAMTS4,ALOX5,ANGPTL2,ANO10,ANPEP,ANXA9,ARHGEF40,ATP10A,ATP10D,ATP2A1,AZIN2,BMP1,C2CD4D,CD44,CD70,CDH11,CDH2,CDKN1B,CLDN3,CLU,CNN1,COL12A1,COL1A1,COL1A2,COL4A2,COL5A2,COL6A1,CP,CRABP2,CRYAB,CSF2RA,CSF3,CSPG4,CTSK,CYP26A1,DACT1,DCN,DZIP1L,ECE1,ECM1,EFEMP2,EMILIN1,ENG,FAP,FBLN5,FGF8,FGFR1,FN1,GAS6,GFPT2,GPX3,GREM1,HSP90B1,HSPA5,HTRA1,IER3,IFIT1,IGFBP5,IL18,ITGA5,ITGB3,ITPR2,JUNB,KIT,LTBP2,MAN…	124
Cancer,Organismal Injury and Abnormalities,Reproductive System Disease	Development of genital tumor	1.54e-11			AASS,ABCC10,ACTG2,ADAM19,ADORA1,AEBP1,AGAP5 (includes others),ALDH1L2,ALOX5,ANPEP,ANTXR2,APBA2,ARHGEF40,ATP10A,ATP10D,ATP2A1,ATP2A3,ATP6AP2,ATP8B1,AZGP1,B3GNT3,BNC1,C1S,C6orf89,CD44,CDH11,CDH13,CDH2,CDKN1B,CFH,CLDN3,CLU,CNN1,COL12A1,COL13A1,COL1A2,COL3A1,COL4A2,COL5A1,COL6A2,COL6A3,COLEC11,CP,CPED1,CRABP2,CSPG4,CTH,CTSL,DACT1,DCN,DMBX1,DNAH2,DPP9,DPT,DZIP1L,ECE1,EDNRA,EGR2,EMILIN1,ENG,EPHB1,EXT2,…	190
Cancer,Organismal Injury and Abnormalities,Reproductive System Disease	Breast or ovarian carcinoma	7.36e-11			AASS,ACTA2,ADAM19,ADAMTS4,ADORA1,AEBP1,ALDH1L2,ALOX5,ANGPTL2,ANO10,ANPEP,ANXA9,ARHGEF40,ATP10A,ATP10D,ATP2A1,ATP8B1,AZGP1,BNC1,C2CD4D,C6orf89,CAMK2N2,CD44,CD70,CDH2,CDKN1B,CFH,CLDN3,CLU,CNN1,COL12A1,COL1A2,COL3A1,COL4A2,COL5A1,COL5A2,COL6A1,COL6A2,COL6A3,CP,CSPG4,CYP26A1,DACT1,DCN,DMBX1,DNAH2,DZIP1L,ECE1,ECM1,EGR2,FAP,FBLN5,FGF5,FGF8,FGFR1,FN1,FOXO4,GABBR2,GAS6,GFPT2,GPX3,GREM1,HAS2,HSP90B1,HTRA1…	139
Cancer,Organismal Injury and Abnormalities,Reproductive System Disease	Female genital tract cancer	8.79e-11			AASS,ABCC10,ACTG2,ADAM19,ADORA1,AEBP1,AGAP5 (includes others),ALDH1L2,ALOX5,ANPEP,ANTXR2,APBA2,ARHGEF40,ATP10A,ATP10D,ATP2A1,ATP2A3,ATP6AP2,ATP8B1,AZGP1,B3GNT3,BNC1,C1S,C6orf89,CAMK2N2,CD44,CDH11,CDH13,CDH2,CDKN1B,CFH,CLDN3,CLU,CNN1,COL12A1,COL13A1,COL1A2,COL3A1,COL4A1,COL4A2,COL5A1,COL6A2,COL6A3,COLEC11,CP,CPED1,CRABP2,CSF3,CSPG4,CTH,CTSL,DACT1,DCN,DMBX1,DNAH2,DPP9,DPT,DZIP1L,ECE1,EDNRA,EGR2,EMI…	188
Cancer,Organismal Injury and Abnormalities,Reproductive System Disease	Uterine serous papillary cancer	1.72e-10			ACTG2,B3GNT3,CDH11,CDH13,CLDN3,CNN1,COL3A1,CSPG4,DPT,EDNRA,EMILIN1,FBLN5,HEPH,IGFBP5,IL18,KRT34,KRT81,MFAP4,MFAP5,PI3,SPOCK2,TGFB1I1,TNXB,UCHL1,WNT7A	25
Cancer,Organismal Injury and Abnormalities,Reproductive System Disease	Male genital neoplasm	3.57e-10		0.442	ADAMTS4,AEBP1,AGAP5 (includes others),ANGPTL1,ANKRD1,ANTXR2,ANXA9,ARHGEF40,ATP10D,ATP8B1,B4GAT1,BNC1,BRSK2,C11orf52,C1S,CACNB3,CD44,CD70,CDH11,CDH2,CDKN1B,CDYL2,CEACAM1,CFH,CLU,COL12A1,COL13A1,COL1A1,COL3A1,COL4A1,COL4A2,COL5A1,COL5A2,COL6A2,COL6A3,CPD,CPED1,CR2,CSF2RA,CSPG4,CTSK,DACT1,DEGS1,DKK3,DMBX1,DNAH2,ECE1,ECM1,EDNRA,EHD3,ELN,EMILIN1,ENG,EPHB1,ETV3,FAM180A,FAP,FBLN5,FGF8,FGFR1,FN1,FZD4,GAB…	168
Cancer,Organismal Injury and Abnormalities,Reproductive System Disease	Uterine tumor	9.17e-10			AASS,ABCC10,ACTG2,ADAM19,AGAP5 (includes others),ALOX5,ANTXR2,APBA2,ATP10A,ATP2A1,ATP2A3,ATP6AP2,ATP8B1,B3GNT3,BNC1,C1S,CD44,CDH11,CDH13,CDH2,CDKN1B,CFH,CLDN3,CLU,CNN1,COL12A1,COL13A1,COL3A1,COL4A2,COL5A1,COL6A3,COLEC11,CP,CPED1,CRABP2,CSPG4,CTH,CTSL,DACT1,DCN,DPP9,DPT,DZIP1L,ECE1,EDNRA,EMILIN1,ENG,EPHB1,EXT2,FAM171B,FAP,FBLN5,FGFR1,FMO3,FN1,GAS6,GFAP,GLT8D2,GPC1,GPR155,GRK5,HAS2,HEPH,HSP90B1,HTR…	155
Cancer,Organismal Injury and Abnormalities,Reproductive System Disease	Malignant neoplasm of male genital organ	1.25e-09			ADAMTS4,AEBP1,AGAP5 (includes others),ANGPTL1,ANKRD1,ANTXR2,ANXA9,ARHGEF40,ATP10D,ATP8B1,BNC1,BRSK2,C11orf52,C1S,CACNB3,CD44,CD70,CDH11,CDH2,CDKN1B,CDYL2,CEACAM1,CFH,CLU,COL12A1,COL13A1,COL1A1,COL3A1,COL4A1,COL4A2,COL5A1,COL5A2,COL6A2,COL6A3,CPD,CPED1,CR2,CSF2RA,CSPG4,CTSK,DACT1,DEGS1,DKK3,DMBX1,DNAH2,ECE1,ECM1,EDNRA,EHD3,ELN,EMILIN1,EPHB1,ETV3,FAM180A,FAP,FBLN5,FGF8,FN1,FZD4,GABBR2,GIPR,GP6,GPC1…	165
Cancer,Organismal Injury and Abnormalities,Reproductive System Disease	Prostatic tumor	4.67e-09		0.64	ADAMTS4,AEBP1,AGAP5 (includes others),ANGPTL1,ANKRD1,ANTXR2,ANXA9,ARHGEF40,ATP10D,ATP8B1,B4GAT1,BNC1,BRSK2,C1S,CACNB3,CD44,CD70,CDH11,CDH2,CDKN1B,CDYL2,CEACAM1,CFH,CLU,COL12A1,COL13A1,COL1A1,COL3A1,COL4A1,COL4A2,COL5A1,COL5A2,COL6A2,COL6A3,CPD,CPED1,CR2,CSF2RA,CSPG4,CTSK,DACT1,DEGS1,DKK3,DMBX1,DNAH2,ECE1,ECM1,EDNRA,EHD3,ELN,EMILIN1,ENG,EPHB1,ETV3,FAM180A,FBLN5,FGF8,FGFR1,FN1,FZD4,GABBR2,GIPR,GP6,…	162
Cancer,Organismal Injury and Abnormalities,Reproductive System Disease	Breast carcinoma	1.3e-08			ACTA2,ADAMTS4,ALOX5,ANGPTL2,ANO10,ANPEP,ANXA9,ARHGEF40,ATP10A,ATP10D,ATP2A1,C2CD4D,CD44,CD70,CDH2,CDKN1B,CLU,CNN1,COL12A1,COL1A2,COL4A2,COL5A2,COL6A1,CSPG4,CYP26A1,DACT1,DCN,DZIP1L,ECE1,ECM1,FAP,FBLN5,FGF8,FGFR1,FN1,GAS6,GFPT2,GPX3,GREM1,HSP90B1,HTRA1,IER3,IFIT1,IGFBP5,IL18,ITGB3,ITPR2,KIT,LTBP2,MAN1C1,MMP14,MMP2,MT1E,NID1,NID2,OLFML2A,OSMR,PAMR1,PCDHAC1,PDCD1,PDCD1LG2,PDGFRB,PLA2G15,PLXDC2,PRRX1…	89
Cancer,Organismal Injury and Abnormalities,Reproductive System Disease	Invasive breast cancer	1.61e-08			ACTA2,ADAMTS4,ANPEP,CD44,CNN1,COL1A2,CSF2RA,DACT1,DCN,FAP,FBLN5,FGFR1,FN1,GPX3,GREM1,HSP90B1,IER3,MMP14,MMP2,MT1E,PAMR1,PDCD1,SERPINE1,TAGLN,TLE3,TMEM158,TPM2,TUBA1A	28
Cancer,Organismal Injury and Abnormalities,Reproductive System Disease	Prostate cancer	1.84e-08			ADAMTS4,AEBP1,AGAP5 (includes others),ANGPTL1,ANKRD1,ANTXR2,ANXA9,ARHGEF40,ATP10D,ATP8B1,BNC1,BRSK2,C1S,CACNB3,CD44,CD70,CDH11,CDH2,CDKN1B,CDYL2,CEACAM1,CFH,CLU,COL12A1,COL13A1,COL1A1,COL3A1,COL4A1,COL4A2,COL5A1,COL5A2,COL6A2,COL6A3,CPD,CPED1,CR2,CSF2RA,CSPG4,CTSK,DACT1,DEGS1,DKK3,DMBX1,DNAH2,ECE1,ECM1,EDNRA,EHD3,ELN,EMILIN1,EPHB1,ETV3,FAM180A,FBLN5,FGF8,FN1,FZD4,GABBR2,GIPR,GP6,GPC1,GPR155,GPX2,…	159
Cancer,Organismal Injury and Abnormalities,Reproductive System Disease	Female genital tract adenocarcinoma	4.74e-08			AASS,ACTG2,ADAM19,ADORA1,AEBP1,AGAP5 (includes others),ALDH1L2,ALOX5,ANPEP,APBA2,ARHGEF40,ATP10A,ATP10D,ATP2A1,ATP2A3,ATP8B1,AZGP1,B3GNT3,BNC1,C1S,C6orf89,CD44,CDH11,CDH13,CDH2,CDKN1B,CFH,CLDN3,CLU,CNN1,COL12A1,COL13A1,COL1A2,COL3A1,COL4A2,COL5A1,COL6A2,COL6A3,COLEC11,CP,CPED1,CRABP2,CSPG4,CTH,DACT1,DCN,DMBX1,DNAH2,DPP9,DPT,DZIP1L,EDNRA,EGR2,EMILIN1,ENG,EPHB1,FAP,FBLN5,FGF5,FGFR1,FMO3,FN1,FOXO4,G…	154
Cancer,Organismal Injury and Abnormalities,Respiratory Disease	Respiratory system tumor	6.75e-11		0.276	ABCA7,ABCC10,ACTA2,ADAM19,ADORA1,AGAP5 (includes others),AKR1B10,ALDH1L2,ALOX5,ANGPTL1,ANGPTL2,ANGPTL4,ANPEP,ANTXR2,ANXA9,APLP2,ARSI,ATP10A,ATP10D,ATP6AP2,C11orf52,CD151,CD44,CDH11,CDH13,CDKN1B,CDYL2,CEACAM1,CFH,CLDN3,CLU,COL12A1,COL13A1,COL1A1,COL1A2,COL3A1,COL4A1,COL5A1,COL6A3,CPD,CRYAB,CSF3,CSPG4,CTH,CTTNBP2NL,CYGB,CYP26A1,DCN,DEGS1,DNAH2,DPT,DRD1,DZIP1L,EPHB1,FAM171B,FAP,FBLN5,FGF8,FGFR1,FMO3…	149
Cancer,Organismal Injury and Abnormalities,Respiratory Disease	Lung tumor	7.91e-11		0.447	ABCC10,ACTA2,ADAM19,ADORA1,AGAP5 (includes others),AKR1B10,ALOX5,ANGPTL1,ANGPTL2,ANGPTL4,ANPEP,ANTXR2,ANXA9,APLP2,ARSI,ATP10A,C11orf52,CD151,CD44,CDH13,CDKN1B,CEACAM1,CFH,CLDN3,CLU,COL12A1,COL13A1,COL1A1,COL3A1,COL4A1,COL5A1,COL6A3,CPD,CRYAB,CSF3,CSPG4,CTH,CTTNBP2NL,CYGB,CYP26A1,DCN,DEGS1,DNAH2,DPT,DRD1,EPHB1,FAM171B,FAP,FBLN5,FGF8,FGFR1,FMO3,FN1,FOXO4,GGN,GIPR,GLT8D2,GPX3,HEPH,HSP90B1,HTRA1,IFIT…	132
Cancer,Organismal Injury and Abnormalities,Respiratory Disease	Pulmonary metastasis	1.23e-10		0.837	ALOX5,ANGPTL4,ANPEP,CD151,CDKN1B,CLU,CSF3,FGF8,FGFR1,HTRA1,IL15,IL18,ITGB3,KIT,MMP2,MMP3,NID2,NT5E,PDGFRB,RAB11FIP4,SERPINE1,WNT5A	22
Cancer,Organismal Injury and Abnormalities,Respiratory Disease	Advanced lung cancer	2.04e-10		0.837	ALOX5,ANGPTL4,ANPEP,CD151,CD44,CDKN1B,CLDN3,CLU,CSF3,FGF8,FGFR1,FN1,HSP90B1,HTRA1,IL15,IL18,ITGB3,KIT,MMP2,MMP3,NID2,NT5E,PDCD1,PDGFRB,RAB11FIP4,SERPINE1,TUBA1A,WNT5A	28
Cancer,Organismal Injury and Abnormalities,Respiratory Disease	Lung cancer	2.83e-10		0.789	ABCC10,ACTA2,ADAM19,ADORA1,AGAP5 (includes others),AKR1B10,ALOX5,ANGPTL1,ANGPTL2,ANGPTL4,ANPEP,ANTXR2,ANXA9,APLP2,ARSI,ATP10A,C11orf52,CD151,CD44,CDH13,CDKN1B,CEACAM1,CFH,CLDN3,CLU,COL12A1,COL13A1,COL1A1,COL3A1,COL4A1,COL5A1,COL6A3,CPD,CSF3,CSPG4,CTH,CTTNBP2NL,CYGB,CYP26A1,DCN,DEGS1,DNAH2,DPT,DRD1,EPHB1,FAM171B,FAP,FBLN5,FGF8,FGFR1,FMO3,FN1,FOXO4,GGN,GIPR,GLT8D2,GPX3,HEPH,HSP90B1,HTRA1,IFIT3,IL15…	128
Cancer,Organismal Injury and Abnormalities,Tumor Morphology	Invasion of tumor	1.83e-09	Increased	3.416	CD151,CD44,CEACAM1,CLU,CSF3,CTSL,ESM1,FAP,FN1,GPC1,HSPA5,IGFBP5,ITGA5,MMP1,MMP14,MMP2,MMP3,NEDD9,NRP1,S100P,SERPINE1,SPHK1,TRPV2,VCAN,WNT5A	25
Cardiovascular Disease	Vascular lesion	1.07e-16		-0.622	ACTA2,ALOX5,ANGPTL4,CD44,COL1A1,COL3A1,COL5A1,COL5A2,CTSK,CTSL,EDNRA,EFEMP2,ELN,FN1,HAS2,IL18,IL1R1,ITGB3,MFAP5,MICA,MMP11,MMP14,MMP2,MMP3,MRTFB,OSMR,PDCD1,PECAM1,PLA2G15,PPARA,SERPINE1,SPARC,TIMP3,TNFRSF11B,TNFRSF1A,VCAN	36
Cardiovascular Disease	Aneurysm	1.1e-12		-1.732	ACTA2,COL1A1,COL3A1,COL5A1,COL5A2,CTSK,CTSL,EDNRA,EFEMP2,ELN,MFAP5,MMP11,MMP14,MMP2,MMP3,MRTFB,SPARC,TIMP3,VCAN	19
Cardiovascular Disease	Occlusion of blood vessel	2.5e-09		1.396	ACTA2,ADORA1,ALOX5,ANGPTL4,CD44,CDH13,CLU,COL5A2,ELN,FGF5,FMO3,FN1,GJA1,GREM1,IL18,IL1R1,ITGA2B,ITGB3,JUNB,MICA,MMP11,MMP14,MMP2,MMP3,NPPB,NPPC,OLR1,OSMR,PDCD1,PECAM1,PLA2G15,PPARA,SCARB2,SERPINE1,SMG6,SP110,TIMP3,TNFRSF11B,TNFRSF1A,TNFRSF9,TUBA1A,VCAN	42
Cardiovascular Disease,Cardiovascular System Development and Function	Abnormal morphology of cardiovascular system	1.76e-17			ACTA2,ACTG2,ADAM19,ADORA1,ANKRD1,ATP2A3,BMP1,CACNB3,CALR,CD151,CD44,CDH2,CDKN1B,CFH,CLU,COL3A1,COL5A1,COL9A2,CRYAB,CSF3,CYP26A1,DACT1,ECE1,EDNRA,EFEMP2,EHD3,ELN,ENG,FGF8,FGFR1,FKBP1B,FN1,GBX2,GFAP,GJA1,GPX3,GRK5,HAS2,HSP90B1,IER3,IL15,IL17RA,IL18,IL1R1,INHBA,ITGA5,ITGB3,LTBP1,MFAP5,MMP1,MMP10,MMP11,MMP14,MMP2,MRTFB,MSX1,NID1,NRP1,NT5E,P2RY6,PDCD1,PDGFRB,PLA2G15,PLOD1,PPARA,PRKD1,PRRX1,RHBDF1,SCG5…	75
Cardiovascular Disease,Cardiovascular System Development and Function,Organ Morphology,Organismal Development,Organismal Injury and Abnormalities	Abnormal morphology of heart	8.15e-10			ACTG2,ADAM19,ADORA1,ANKRD1,ATP2A3,CACNB3,CALR,CDH2,CDKN1B,CLU,COL3A1,COL9A2,CRYAB,CSF3,CYP26A1,DACT1,ECE1,EDNRA,ELN,FGF8,FGFR1,FKBP1B,FN1,GJA1,GPX3,GRK5,HAS2,HSP90B1,IER3,IL17RA,IL18,IL1R1,INHBA,ITGB3,LTBP1,MMP1,MMP10,MMP11,MMP14,MMP2,MRTFB,MSX1,NT5E,P2RY6,PDCD1,PLA2G15,PPARA,PRKD1,RHBDF1,SCG5,SERPINE1,SLCO2A1,TIMP3,TNFRSF1A	54
Cardiovascular Disease,Cardiovascular System Development and Function,Organ Morphology,Organismal Development,Organismal Injury and Abnormalities	Enlargement of heart	3.36e-08			ACTG2,ADORA1,ANKRD1,ATP2A3,CACNB3,CDH2,CDKN1B,COL3A1,COL9A2,CRYAB,CSF3,DACT1,ECE1,EDNRA,ELN,FGFR1,FKBP1B,FN1,GJA1,GPX3,GRK5,IER3,IL17RA,IL18,IL1R1,INHBA,ITGB3,MMP1,MMP10,MMP11,MMP14,MMP2,NT5E,P2RY6,PDCD1,PPARA,PRKD1,SCG5,SERPINE1,SLCO2A1,TIMP3,TNFRSF1A	42
Cardiovascular Disease,Cardiovascular System Development and Function,Organismal Injury and Abnormalities	Abnormal morphology of vasculature	8.22e-17			ACTA2,ANTXR2,BMP1,CACNB3,CD151,CFH,CLU,COL3A1,COL5A1,ECE1,EDNRA,EFEMP2,EHD3,ELN,ENG,FGF8,FN1,GBX2,GFAP,GJA1,HAS2,IL15,IL18,ITGA5,LTBP1,MFAP5,MMP14,MMP2,MRTFB,NID1,NPAS3,NRP1,PDGFRB,PKD2,PLOD1,PRRX1,SCARB2,SEMA5A,SYDE1,TIMP3,TNFRSF11B,TNFRSF1A	42
Cardiovascular Disease,Cardiovascular System Development and Function,Organismal Injury and Abnormalities,Tissue Morphology	Abnormal morphology of aorta	1.64e-17			ACTA2,BMP1,COL3A1,COL5A1,ECE1,EDNRA,EFEMP2,ELN,FGF8,GBX2,LTBP1,MFAP5,MMP2,MRTFB,NRP1,PLOD1,PRRX1,TIMP3,TNFRSF11B	19
Cardiovascular Disease,Cardiovascular System Development and Function,Organismal Injury and Abnormalities,Tissue Morphology	Abnormal morphology of blood vessel	2.31e-16			ACTA2,BMP1,CACNB3,CD151,CFH,CLU,COL3A1,COL5A1,ECE1,EDNRA,EFEMP2,EHD3,ELN,ENG,FGF8,FN1,GBX2,GFAP,GJA1,HAS2,IL15,ITGA5,LTBP1,MFAP5,MMP14,MMP2,MRTFB,NID1,NRP1,PDGFRB,PLOD1,PRRX1,SEMA5A,TIMP3,TNFRSF11B,TNFRSF1A	36
Cardiovascular Disease,Cardiovascular System Development and Function,Organismal Injury and Abnormalities,Tissue Morphology	Abnormal morphology of artery	5.2e-14			ACTA2,BMP1,COL3A1,COL5A1,ECE1,EDNRA,EFEMP2,ELN,ENG,FGF8,FN1,GBX2,GJA1,IL15,ITGA5,LTBP1,MFAP5,MMP2,MRTFB,NRP1,PLOD1,PRRX1,TIMP3,TNFRSF11B	24
Cardiovascular Disease,Hematological Disease,Organismal Injury and Abnormalities	Thrombus	1.22e-06		1.831	ATP2A3,CALR,CEACAM1,CFH,COL1A1,COL4A1,EDNRA,GAS6,GP6,GPX3,ITGA2B,ITGB3,MMP2,NT5E,PDGFRB,PECAM1,SELPLG,SERPINE1,SERPINE2,TNFRSF1A	20
Cardiovascular Disease,Hereditary Disorder,Organismal Injury and Abnormalities	Familial vascular disease	2.55e-12		-1.994	ACTA2,CFH,COL1A1,COL3A1,COL4A1,COL5A1,COL5A2,DCN,DRD1,ECE1,EDNRA,ELN,ENG,FZD4,HTRA1,ITGA2B,ITGB3,LTBP1,MFAP5,NPPB,NRP1,NT5E,OLR1,PDGFRB,RNF213,S100P,SELENOS,SP110,TMEM173,VCAN	30
Cardiovascular Disease,Hereditary Disorder,Organismal Injury and Abnormalities	Familial cardiovascular disease	3.96e-10		-1.994	ACTA2,ANKRD1,ANTXR2,CFH,COL1A1,COL1A2,COL3A1,COL4A1,COL5A1,COL5A2,CRYAB,DCN,DRD1,ECE1,EDNRA,ELN,ENG,FZD4,GBX2,GJA1,HTRA1,ITGA2B,ITGB3,LTBP1,MFAP5,MRTFB,NPPB,NRP1,NT5E,OLR1,PDGFRB,PPARA,PRKD1,RHBDF1,RNF213,S100P,SELENOS,SP110,TMEM173,VCAN,WNK4	41
Cardiovascular Disease,Organismal Injury and Abnormalities	Peripheral vascular disease	3.8e-13		-0.342	ACTA2,ALOX5,CACNB3,CDH2,CFH,CLU,COL1A1,COL1A2,COL4A1,COL6A1,DRD1,EDNRA,EGR2,ENG,FN1,GJA1,GPX3,HTRA1,IGFBP5,IL15,IL18,IL1R1,ITGA2B,ITGB3,LPXN,MMP3,NEDD9,NPPB,NRP1,NRXN3,OLR1,PPARA,RNF213,S100P,SELENOS,SERPINE1,SLC22A3,SLC2A3,SV2A,THY1,TIMP3,TNFRSF11B,TNFRSF1A,TTC33,TUBA1A	45
Cardiovascular Disease,Organismal Injury and Abnormalities	Aortic aneurysm	1.42e-12		-1.718	ACTA2,COL1A1,COL3A1,COL5A1,COL5A2,CTSK,CTSL,EFEMP2,ELN,MFAP5,MMP11,MMP14,MMP2,MMP3,MRTFB,TIMP3,VCAN	17
Cardiovascular Disease,Organismal Injury and Abnormalities	Vaso-occlusion	1.08e-09		1.502	ACTA2,ADORA1,ALOX5,ANGPTL4,CD44,CDH13,CLU,COL5A2,EDNRA,ELN,FGF5,FMO3,FN1,GJA1,GREM1,IL18,IL1R1,ITGA2B,ITGB3,JUNB,MICA,MMP11,MMP14,MMP2,MMP3,NPPB,NPPC,OLR1,OSMR,PDCD1,PECAM1,PLA2G15,PPARA,SCARB2,SERPINE1,SMG6,SP110,TIMP3,TNFRSF11B,TNFRSF1A,TNFRSF9,TUBA1A,VCAN	43
Cardiovascular Disease,Organismal Injury and Abnormalities	Arteriosclerosis	1.32e-09		1.502	ACTA2,ADORA1,ALOX5,ANGPTL4,CD44,CDH13,CLU,COL5A2,ELN,FGF5,FMO3,FN1,GJA1,GREM1,IL18,IL1R1,ITGB3,JUNB,MICA,MMP11,MMP14,MMP2,MMP3,NPPB,OLR1,OSMR,PDCD1,PECAM1,PLA2G15,PPARA,SERPINE1,SMG6,SPARC,TIMP3,TNFRSF11B,TNFRSF1A,TNFRSF9,TUBA1A,VCAN	39
Cardiovascular Disease,Organismal Injury and Abnormalities	Atherosclerosis	3.15e-09		1.502	ACTA2,ADORA1,ALOX5,ANGPTL4,CD44,CDH13,CLU,COL5A2,ELN,FGF5,FMO3,FN1,GJA1,GREM1,IL18,IL1R1,ITGB3,JUNB,MICA,MMP11,MMP14,MMP2,MMP3,NPPB,OLR1,OSMR,PDCD1,PECAM1,PLA2G15,PPARA,SERPINE1,SMG6,TIMP3,TNFRSF11B,TNFRSF1A,TNFRSF9,TUBA1A,VCAN	38
Cardiovascular Disease,Organismal Injury and Abnormalities	Occlusion of artery	4.59e-09		1.502	ACTA2,ADORA1,ALOX5,ANGPTL4,CD44,CDH13,CLU,COL5A2,ELN,FGF5,FMO3,FN1,GJA1,GREM1,IL18,IL1R1,ITGA2B,ITGB3,JUNB,MICA,MMP11,MMP14,MMP2,MMP3,NPPB,NPPC,OLR1,OSMR,PDCD1,PECAM1,PLA2G15,PPARA,SCARB2,SERPINE1,SMG6,TIMP3,TNFRSF11B,TNFRSF1A,TNFRSF9,TUBA1A,VCAN	41
Cardiovascular System Development and Function	Morphology of vessel	1.37e-19			ACTA2,ANGPTL4,BMP1,CACNB3,CD151,CDKN1B,CFH,CLU,CNN1,COL3A1,COL5A1,CRYAB,CYGB,ECE1,EDNRA,EFEMP2,EHD3,ELN,ENG,FBLN5,FGF8,FN1,GBX2,GFAP,GJA1,HAS2,IL15,ITGA5,LTBP1,MFAP5,MMP14,MMP2,MRTFB,NID1,NRP1,OLR1,PDGFRB,PI3,PLOD1,PRRX1,SEMA5A,SERPINE1,SPHK1,TIMP3,TNFRSF11B,TNFRSF1A	46
Cardiovascular System Development and Function	Morphology of vasculature	1.04e-18			ACTA2,ANTXR2,BMP1,CACNB3,CD151,CDKN1B,CFH,CLU,CNN1,COL3A1,COL5A1,CRYAB,CYGB,ECE1,EDNRA,EFEMP2,EHD3,ELN,ENG,FBLN5,FGF8,FN1,GBX2,GFAP,GJA1,HAS2,IL15,IL18,ITGA5,LTBP1,MFAP5,MMP14,MMP2,MRTFB,NID1,NPAS3,NRP1,PDGFRB,PKD2,PLOD1,PRRX1,SCARB2,SEMA5A,SERPINE1,SYDE1,TIMP3,TNFRSF11B,TNFRSF1A	48
Cardiovascular System Development and Function	Morphology of cardiovascular system	1.02e-17			ACTA2,ACTG2,ADAM19,ADORA1,ANKRD1,ATP2A3,BMP1,CACNB3,CALR,CD151,CD44,CDH2,CDKN1B,CEACAM1,CFH,CLU,CNN1,COL3A1,COL5A1,COL9A2,CRYAB,CSF3,CYGB,CYP26A1,DACT1,ECE1,EDNRA,EFEMP2,EHD3,ELN,ENG,FBLN5,FGF8,FGFR1,FKBP1B,FN1,GAS6,GBX2,GFAP,GJA1,GPX3,GRK5,HAS2,HSP90B1,IER3,IL15,IL17RA,IL18,IL1R1,INHBA,ITGA5,ITGB3,LTBP1,MFAP5,MMP1,MMP10,MMP11,MMP14,MMP2,MRTFB,MSX1,NID1,NRP1,NT5E,P2RY6,PDCD1,PDGFRB,PLA2G15,PLOD1,…	80
Cardiovascular System Development and Function	Function of blood vessel	2.13e-10			CACNB3,CD44,EFEMP2,ELN,FN1,GJA1,GPX3,IL1R1,MMP10,MMP2,MMP3,TGFB1I1,TIMP3	13
Cardiovascular System Development and Function	Development of vasculature	2.69e-30	Increased	2.582	ACTA2,ADAM19,ANGPTL1,ANGPTL2,ANGPTL4,ANPEP,ANTXR2,BMP1,CACNB3,CALR,CD151,CD44,CD81,CDH13,CDH2,CDKN1B,CEACAM1,CFH,CLU,CNN1,COL13A1,COL1A1,COL1A2,COL3A1,COL4A1,COL4A2,COL5A1,CRYAB,CSF3,CSPG4,CTH,CYGB,DCN,ECE1,ECM1,EDNRA,EFEMP2,EHD3,ELN,EMILIN1,ENG,EPHB1,ESM1,FBLN5,FGF5,FGF8,FGFR1,FN1,FOXO4,FZD4,GAS6,GBX2,GFAP,GJA1,GPC1,GRAP2,GREM1,HAS2,HSPA5,HTRA1,IL13RA2,IL15,IL18,INHBA,ITGA5,ITGB3,JAM2,JUNB,KIT,L…	111
Cardiovascular System Development and Function	Vascularization	4.34e-09	Increased	2.648	ANPEP,CD44,CDH13,CEACAM1,CRYAB,CSF3,ENG,FGF8,FGFR1,GAS6,HTRA1,IGFBP5,IL18,INHBA,ITGB3,KIT,MMP14,MMP2,MMP3,NRP1,RNF213,SERPINE1,SERPINF1,SPHK1,WNT5A	25
Cardiovascular System Development and Function	Morphogenesis of cardiovascular system	2.41e-08		1.698	ADAM19,ANKRD1,ANPEP,CDH2,COL1A1,COL4A1,COL5A1,CYP26A1,ELN,EMILIN1,ENG,FGF8,FGFR1,GAS6,GJA1,MMP2,MRTFB,MSX1,NRP1,PECAM1,PIK3C2B,PKD2,PRRX1,ROBO1,WNT5A	25
Cardiovascular System Development and Function	Neovascularization	1.34e-06		1.82	ANPEP,CD44,CDH13,CSF3,FGFR1,HTRA1,IGFBP5,IL18,INHBA,ITGB3,KIT,MMP14,MMP2,NRP1,RNF213,SERPINF1,SPHK1	17
Cardiovascular System Development and Function,Cell Morphology,Cellular Development,Organismal Development,Tissue Development	Tubulation of endothelial cells	8.36e-10		0.55	ANGPTL4,ANTXR2,CD44,CD81,COL1A1,CRYAB,ENG,FGF5,GAS6,MMP2,NRP1,OLR1,PECAM1,PPARA,ROBO1,SERPINF1,THY1,TIMP3	18
Cardiovascular System Development and Function,Cell-To-Cell Signaling and Interaction	Binding of endothelial cells	2.04e-10		0.689	ANGPTL1,CD151,CD44,CD81,CDH2,DCN,ELN,FBLN5,FN1,GAS6,GPC1,HAS2,HSPA5,ITGB3,KIT,NRP1,NT5E,OLR1,PECAM1,SELPLG,SERPINE1,SPARC,THY1,TIMP3	24
Cardiovascular System Development and Function,Cellular Development,Cellular Function and Maintenance,Cellular Growth and Proliferation,Organismal Development,Tissue Development	Endothelial cell development	3.3e-14		1.684	ANGPTL1,ANGPTL4,ANPEP,ANTXR2,CALR,CD151,CD44,CDH13,CDH2,CDKN1B,CEACAM1,COL1A1,COL1A2,COL4A1,COL4A2,ECM1,ENG,FGF5,FGFR1,FN1,GAS6,GJA1,GPC1,HSPA5,IL18,INHBA,ITGB3,KIT,MMP1,MMP14,MMP2,NRP1,PECAM1,PIK3C2B,PPARA,PRKD1,SEMA5A,SERPINE1,SERPINF1,SPARC,THY1,WNT5A	42
Cardiovascular System Development and Function,Cellular Development,Cellular Function and Maintenance,Cellular Growth and Proliferation,Organismal Development,Tissue Development	Proliferation of endothelial cells	6.94e-13		1.475	ANGPTL1,ANGPTL4,ANTXR2,CALR,CD44,CDH13,CDH2,CDKN1B,CEACAM1,COL1A1,COL1A2,COL4A1,COL4A2,ECM1,ENG,FGF5,FGFR1,FN1,GAS6,GJA1,GPC1,HSPA5,IL18,INHBA,ITGB3,KIT,MMP1,NRP1,PECAM1,PPARA,PRKD1,SEMA5A,SERPINE1,SERPINF1,SPARC,THY1,WNT5A	37
Cardiovascular System Development and Function,Cellular Movement	Migration of endothelial cells	1.13e-16	Increased	2.419	ANGPTL1,ANGPTL4,CALR,CD151,CD44,CD81,CDH13,CDKN1B,CEACAM1,COL4A1,COL4A2,CRYAB,CSF3,DCN,ELN,ENG,FAP,FGF5,FGFR1,FN1,GAS6,GPC1,GREM1,HSPA5,ITGB3,MMP14,MMP2,NRP1,OLR1,PDGFRB,PECAM1,PIK3C2B,PRKD1,ROBO1,S100P,SEMA5A,SERPINE1,SERPINF1,SP100,SPARC,THY1,TIMP3,WNT5A,WNT7A	44
Cardiovascular System Development and Function,Cellular Movement	Cell movement of endothelial cells	2e-17	Increased	2.488	ANGPTL1,ANGPTL4,ANPEP,CALR,CD151,CD44,CD81,CDH13,CDH2,CDKN1B,CEACAM1,COL4A1,COL4A2,CRYAB,CSF3,CSPG4,DCN,ELN,ENG,FAP,FGF5,FGFR1,FN1,GAS6,GPC1,GREM1,HSPA5,ITGB3,MMP14,MMP2,NRP1,OLR1,PDGFRB,PECAM1,PIK3C2B,PRKD1,ROBO1,S100P,SEMA5A,SERPINE1,SERPINF1,SP100,SPARC,THY1,TIMP3,WNT5A,WNT7A	47
Cardiovascular System Development and Function,Hematological System Development and Function	Blood pressure	3.45e-07		-0.064	ACTA2,ADORA1,CACNB3,CD44,CD81,CDH13,CLMP,COL1A2,CRYAB,ECE1,EDNRA,ELN,FKBP1B,GBP5,IER3,IL1R1,ITGB3,NPPC,OXTR,PDCD1,PPARA,SERPINE1,SOD3,SPX,TIMP3,WNK4	26
Cardiovascular System Development and Function,Organ Morphology,Organismal Development	Morphology of heart	3.67e-09			ACTG2,ADAM19,ADORA1,ANKRD1,ATP2A3,CACNB3,CALR,CDH2,CDKN1B,CLU,COL3A1,COL9A2,CRYAB,CSF3,CYP26A1,DACT1,ECE1,EDNRA,EFEMP2,ELN,FGF8,FGFR1,FKBP1B,FN1,GJA1,GPX3,GRK5,HAS2,HSP90B1,IER3,IL17RA,IL18,IL1R1,INHBA,ITGB3,LTBP1,MMP1,MMP10,MMP11,MMP14,MMP2,MRTFB,MSX1,NT5E,P2RY6,PDCD1,PLA2G15,PPARA,PRKD1,RHBDF1,SCG5,SERPINE1,SLCO2A1,TIMP3,TNFRSF1A	55
Cardiovascular System Development and Function,Organismal Development	Growth of blood vessel	4.86e-10		1.638	CDKN1B,COL1A1,CSF3,EDNRA,FN1,GAS6,GJA1,ITGA5,ITGB3,JAM2,MMP14,NPPC,NRP1,PDGFRB,SERPINE1,SERPINF1	16
Cardiovascular System Development and Function,Organismal Development	Formation of blood vessel	2.03e-09		-0.194	ANPEP,COL13A1,COL4A2,CTH,FGF8,FN1,GRAP2,ITGB3,JUNB,LTBP1,MMP14,NRP1,OLR1,PDGFRB,PECAM1,ROBO1,SERPINE1,SERPINF1,SPARC,SPHK1,WLS	21
Cardiovascular System Development and Function,Organismal Development	Development of artery	8.77e-09		-0.202	CTH,EFEMP2,ELN,ENG,FBLN5,FGF8,GRAP2,IL13RA2,ITGB3,JUNB,LTBP1,NRP1,PKD2,PRRX1,ROBO1,SERPINE1,SPHK1,WLS	18
Cardiovascular System Development and Function,Organismal Development	Angiogenesis	9.16e-25	Increased	2.55	ANGPTL1,ANGPTL2,ANGPTL4,ANPEP,ANTXR2,CALR,CD151,CD44,CD81,CDH13,CDH2,CDKN1B,CEACAM1,COL13A1,COL1A1,COL1A2,COL3A1,COL4A1,COL4A2,COL5A1,CRYAB,CSF3,CSPG4,CTH,CYGB,DCN,ECE1,ECM1,EDNRA,EFEMP2,EHD3,ELN,EMILIN1,ENG,EPHB1,ESM1,FBLN5,FGF5,FGF8,FGFR1,FN1,FOXO4,FZD4,GAS6,GBX2,GJA1,GPC1,GRAP2,GREM1,HAS2,HSPA5,HTRA1,IL13RA2,IL15,IL18,INHBA,ITGA5,ITGB3,JAM2,JUNB,KIT,LTBP1,MMP1,MMP14,MMP2,MMP3,MRTFB,NPPB,NPPC,N…	95
Cardiovascular System Development and Function,Organismal Development	Vasculogenesis	5.23e-22	Increased	2.652	ANGPTL1,ANGPTL2,ANGPTL4,ANPEP,ANTXR2,CALR,CD151,CD44,CD81,CDH13,CDH2,CDKN1B,CEACAM1,COL13A1,COL1A1,COL1A2,COL4A1,COL4A2,CRYAB,CSF3,CSPG4,CTH,CYGB,DCN,ECE1,ECM1,EDNRA,EFEMP2,EHD3,ELN,ENG,FBLN5,FGF5,FGF8,FGFR1,FN1,FZD4,GAS6,GBX2,GJA1,GPC1,GRAP2,HAS2,HSPA5,HTRA1,IL13RA2,IL18,INHBA,ITGA5,ITGB3,JAM2,JUNB,KIT,LTBP1,MMP1,MMP14,MMP2,MMP3,MRTFB,NPPC,NRP1,OLR1,PDGFRB,PECAM1,PIK3C2B,PKD2,PPARA,PRKD1,PRRX1,R…	80
Cardiovascular System Development and Function,Tissue Development	Development of cardiovascular tissue	4.24e-15		1.46	ANGPTL1,ANGPTL4,ANPEP,ANTXR2,CALR,CD151,CD44,CDH13,CDH2,CDKN1B,CEACAM1,COL1A1,COL1A2,COL4A1,COL4A2,CTH,ECM1,ENG,FGF5,FGFR1,FN1,GAS6,GJA1,GPC1,HSPA5,IL18,INHBA,ITGB3,KIT,MMP1,MMP14,MMP2,NRP1,PECAM1,PIK3C2B,PPARA,PRKD1,SEMA5A,SERPINE1,SERPINF1,SPARC,THY1,TIMP3,WNT5A	44
Cardiovascular System Development and Function,Tissue Morphology	Morphology of blood vessel	6.16e-18			ACTA2,BMP1,CACNB3,CD151,CDKN1B,CFH,CLU,CNN1,COL3A1,COL5A1,CRYAB,CYGB,ECE1,EDNRA,EFEMP2,EHD3,ELN,ENG,FBLN5,FGF8,FN1,GBX2,GFAP,GJA1,HAS2,IL15,ITGA5,LTBP1,MFAP5,MMP14,MMP2,MRTFB,NID1,NRP1,PDGFRB,PLOD1,PRRX1,SEMA5A,SERPINE1,TIMP3,TNFRSF11B,TNFRSF1A	42
Cell Death and Survival	Apoptosis	9.49e-15	Decreased	-2.739	A4GALT,ADORA1,AGA,AKR1B10,ALMS1,ALOX5,ANGPTL1,ANGPTL4,ANKRD1,ANPEP,ANTXR2,APOL6,ATP2A1,ATP6AP2,BCL3,BMP1,CALR,CAMK2N2,CD151,CD44,CD70,CDH11,CDH2,CDKN1B,CEACAM1,CFH,CLU,COL1A1,COL4A1,COL4A2,CR2,CRABP2,CRYAB,CSF2RA,CSF3,CSPG4,CTH,CTSL,CYGB,CYP26A1,DCN,DEGS1,DKK3,DPP9,ECE1,EDNRA,EFEMP2,EGR2,EHD3,ENG,FAP,FEM1B,FGF5,FGF8,FGFR1,FN1,FOXO4,GAS6,GIPR,GJA1,GPX2,GRAP2,GREM1,GRK5,HAS2,HSP90B1,HSPA5,HTRA1,IER…	153
Cell Death and Survival	Necrosis	2.25e-14		-1.724	A4GALT,ADORA1,AGA,AKR1B10,ALOX5,ANGPTL1,ANKRD1,ANPEP,ANTXR2,AS3MT,ATP2A1,ATP6AP2,BCL3,CACNB3,CALR,CAMK2N2,CD151,CD44,CD70,CD81,CDH11,CDH2,CDKN1B,CEACAM1,CFH,CLU,COL1A1,COL4A1,COL4A2,COL6A1,CR2,CRABP2,CRYAB,CSF2RA,CSF3,CSPG4,CTH,CYGB,CYP26A1,DCN,DKK3,DPP9,EDNRA,EFEMP2,EGR2,ENG,FAP,FEM1B,FGF5,FGF8,FGFR1,FN1,FOXO4,GAS6,GFAP,GIPR,GJA1,GPC1,GPX2,GRAP2,GRK5,HAS2,HSP90B1,HSPA5,HTRA1,IER3,IGFBP5,IL15,IL1…	152
Cell Death and Survival	Apoptosis of tumor cell lines	5.04e-10		-1.573	A4GALT,ADORA1,AGA,AKR1B10,ALOX5,ANKRD1,ATP2A1,BCL3,CALR,CAMK2N2,CD44,CDKN1B,CEACAM1,CFH,CLU,COL1A1,COL4A1,COL4A2,CRABP2,CRYAB,CSF2RA,CSPG4,CTH,CYGB,CYP26A1,DKK3,EGR2,ENG,FAP,FGF5,FGFR1,FN1,FOXO4,GJA1,GPX2,GRK5,HSPA5,HTRA1,IER3,IGFBP5,IL15,IL18,IL1R1,INHBA,ITGB3,ITPR2,JUNB,KIT,LTBP1,MITF,MME,MMP14,MSX1,NCAM1,NEDD9,NOVA1,NRP1,PECAM1,PI3,PRDM5,PRKD1,RGS3,RNASEL,SERPINE1,SERPINF1,SOD3,SORCS2,SPARC,SP…	81
Cell Death and Survival	Cell death of tumor cell lines	7.24e-10		-1.119	A4GALT,ADORA1,AGA,AKR1B10,ALOX5,ANKRD1,ANTXR2,AS3MT,ATP2A1,BCL3,CALR,CAMK2N2,CD44,CDKN1B,CEACAM1,CFH,CLU,COL1A1,COL4A1,COL4A2,CRABP2,CRYAB,CSF2RA,CSPG4,CTH,CYGB,CYP26A1,DKK3,DPP9,EGR2,ENG,FAP,FGF5,FGF8,FGFR1,FN1,FOXO4,GJA1,GPC1,GPX2,GRK5,HSPA5,HTRA1,IER3,IGFBP5,IL15,IL18,IL1R1,INHBA,IRF2,ITGA5,ITGB3,ITPR2,JUNB,KIT,LTBP1,MITF,MME,MMP14,MMP3,MSX1,NCAM1,NEDD9,NOVA1,NRP1,NT5E,PECAM1,PI3,PRDM5,PRKD1,R…	95
Cell Death and Survival	Cell death of immune cells	2.09e-09		0.678	AGA,ANPEP,ANTXR2,BCL3,CACNB3,CD44,CD70,CD81,CDKN1B,CLU,COL1A1,CR2,CSF2RA,CSF3,DCN,DKK3,FGFR1,FN1,GRAP2,GRK5,HSPA5,IER3,IL15,IL18,IL37,IL7R,INHBA,IRF2,ITGA5,ITPR2,KIT,KLF13,NPPB,PDCD1,PDCD1LG2,PDGFRB,PECAM1,PPARA,RNASEL,SELPLG,SERPINB2,SERPINF1,SPHK1,TMEM173,TNFRSF11B,TNFRSF1A,TNFRSF9,WNT4,WNT5A	49
Cell Death and Survival	Cell viability	6.61e-10	Increased	3.576	ABCC10,ADORA1,AGA,ANGPTL1,ANKRD1,ANTXR2,BCL3,CACNB3,CALR,CD151,CD44,CD81,CDH13,CDH2,CDKN1B,CEACAM1,CLDN3,CLU,COL1A1,CRYAB,CSF2RA,CSF3,CTH,DPP9,ECM1,ENG,EPHB1,FEM1B,FGF5,FGF8,FGFR1,FKBP1B,FN1,FN3K,GAS6,GJA1,GPC1,HSP90B1,HSPA5,IER3,IGFBP5,IL15,IL18,IL7R,ITGB3,ITPR2,KIT,MFAP5,MITF,MMP1,MRAS,MSX1,NCAM1,NRP1,OLR1,PCDHGA12,PCDHGB5,PCDHGB7,PCDHGC3,PDCD1,PDGFRB,PLAC8,PPARA,PRKD1,RNASEL,S100P,SCG5,SELPLG,…	87
Cell Death and Survival	Cell survival	7.28e-11	Increased	3.655	ABCC10,ADORA1,AGA,ANGPTL1,ANKRD1,ANTXR2,BCL3,CACNB3,CALR,CD151,CD44,CD81,CDH13,CDH2,CDKN1B,CEACAM1,CFH,CLDN3,CLU,COL1A1,CRYAB,CSF2RA,CSF3,CTH,DEFB103A/DEFB103B,DPP9,ECM1,ENG,EPHB1,FEM1B,FGF5,FGF8,FGFR1,FKBP1B,FN1,FN3K,GAS6,GJA1,GPC1,HSP90B1,HSPA5,IER3,IGFBP5,IL15,IL18,IL7R,ITGA5,ITGB3,ITPR2,KIT,MFAP5,MITF,MMP1,MRAS,MSX1,NCAM1,NEDD9,NRP1,OLR1,PCDHGA12,PCDHGB5,PCDHGB7,PCDHGC3,PDCD1,PDGFRB,PLAC8,PPA…	93
Cell Death and Survival,Organismal Injury and Abnormalities	Necrosis of epithelial tissue	1.85e-08		-0.501	CALR,CD151,CD44,CDH2,CDKN1B,CEACAM1,CLU,COL4A2,CRYAB,CSF3,CTH,CYGB,DCN,EFEMP2,ENG,FAP,FGFR1,FOXO4,GAS6,HSPA5,IER3,IGFBP5,IL15,IL18,INHBA,ITGA5,MITF,MMP2,MMP3,OLR1,PDGFRB,PECAM1,PPARA,RNASEL,SERPINE1,SERPINF1,SPARC,SPHK1,TCF4,TGFB1I1,TIMP3,TNFRSF11B,TNFRSF1A,VASN	44
Cell Death and Survival,Organismal Injury and Abnormalities	Apoptosis of epithelial cells	2.05e-07		-1.617	CD151,CDH2,CDKN1B,CEACAM1,CLU,CRYAB,CYGB,DCN,ENG,FAP,FGFR1,IGFBP5,IL15,IL18,INHBA,MITF,MMP2,MMP3,PPARA,SPARC,SPHK1,TCF4,TIMP3,TNFRSF1A,VASN	25
Cell Morphology,Cellular Assembly and Organization	Morphology of collagen fibrils	4.68e-10			COL3A1,COL5A1,COL5A2,DCN,DPT,PCOLCE,PLOD1,TNXB	8
Cell Morphology,Cellular Assembly and Organization	Abnormal morphology of collagen fibrils	6.47e-09			COL3A1,COL5A1,COL5A2,DCN,DPT,PLOD1,TNXB	7
Cell Morphology,Tissue Development	Tubulation of cells	2.03e-08		1.215	ANGPTL4,ANTXR2,CD44,CD81,COL1A1,CRYAB,ENG,FGF5,GAS6,MMP2,NRP1,OLR1,PECAM1,PPARA,ROBO1,SERPINF1,THY1,TIMP3,WNT5A	19
Cell Morphology,Tissue Morphology	Morphology of connective tissue cells	3.19e-07			ADORA1,AEBP1,CD44,CDKN1B,COL12A1,CSF3,CTSK,ECM1,IL1R1,ITGB3,LTBP2,MEX3C,MFSD2A,MMP14,MMP3,MRAS,NPPC,PDGFRB,PPARA,SERPINE1,SPARC,TGFB1I1,TNFRSF11B,TNFRSF1A,WDR13,WNT5A,WNT5B	27
Cell-To-Cell Signaling and Interaction	Interaction of tumor cell lines	2.23e-15		1.655	CD151,CD44,CD81,CDH11,CDH2,CFH,CR2,DCN,DKK3,ELN,EMILIN1,EPHB1,ESM1,FBLN5,FN1,GAS6,GFAP,GJA1,HAS2,HS3ST3B1,HSP90B1,HSPA5,IL18,ITGA5,ITGB3,JUNB,MMP14,MMP2,NCAM1,NID1,NRP1,OXTR,PECAM1,RGS3,RNASEL,S100P,SELPLG,SERPINB2,SERPINE1,SERPINF1,TGFB1I1,THY1,TIMP3,UCHL1,VCAN,WNT5A	46
Cell-To-Cell Signaling and Interaction	Binding of tumor cell lines	1.26e-14		1.416	CD151,CD44,CD81,CDH2,CFH,CR2,DCN,DKK3,ELN,EMILIN1,EPHB1,ESM1,FBLN5,FN1,GAS6,GFAP,HAS2,HS3ST3B1,HSP90B1,HSPA5,IL18,ITGA5,ITGB3,JUNB,MMP14,MMP2,NCAM1,NID1,NRP1,OXTR,PECAM1,RGS3,RNASEL,S100P,SELPLG,SERPINB2,SERPINE1,SERPINF1,TGFB1I1,THY1,TIMP3,UCHL1,VCAN,WNT5A	44
Cell-To-Cell Signaling and Interaction	Adhesion of tumor cell lines	1.21e-11		1.126	CD151,CD44,CD81,CDH2,CFH,CR2,DCN,DKK3,ELN,EMILIN1,EPHB1,FBLN5,FN1,GFAP,IL18,ITGA5,ITGB3,JUNB,MMP14,MMP2,NCAM1,NID1,NRP1,RGS3,RNASEL,S100P,SELPLG,SERPINB2,SERPINE1,TGFB1I1,TIMP3,UCHL1,VCAN,WNT5A	34
Cell-To-Cell Signaling and Interaction	Binding of lymphoma cell lines	1.44e-09		-0.875	CD44,CR2,DCN,ELN,FBLN5,FN1,GAS6,HSP90B1,ITGB3,JUNB,PECAM1,RGS3,SELPLG,THY1,VCAN	15
Cell-To-Cell Signaling and Interaction	Adhesion of connective tissue cells	3.25e-09	Increased	2.481	ACTA2,CALR,CD44,CDH11,CDH2,CLU,COL1A1,FN1,ITGA5,ITGB3,LTBP2,MFSD2A,MME,MMP2,PCDHGC3,RNASEL,SPARC,THY1,TNFRSF11B,VCAN	20
Cell-To-Cell Signaling and Interaction	Binding of connective tissue cells	3.62e-09		1.984	ACTA2,CALR,CD44,CDH11,CDH2,CLU,COL1A1,DCN,FN1,ITGA5,ITGB3,LTBP2,MFSD2A,MME,MMP2,PCDHGC3,RNASEL,SPARC,THY1,TNFRSF11B,VCAN	21
Cell-To-Cell Signaling and Interaction	Activation of cells	2.55e-10	Increased	2.706	ADORA1,ALOX5,ATP2A3,BCL3,CALR,CD44,CD81,CDKN1B,CEACAM1,CFH,COL1A1,COL1A2,CR2,CRYAB,CSF3,CTSL,EGR2,FGFR1,FN1,GAS6,GFAP,GJA1,GP6,GREM1,HSP90B1,IL15,IL17RA,IL18,IL1R1,IL37,INHBA,ITGA2B,ITGA5,ITGB3,ITPR2,KIT,LTBP1,LYST,MFSD2A,MICA,MMP1,MMP14,MMP2,MRTFB,NPPB,NT5E,P2RY6,PDCD1,PDCD1LG2,PDGFRB,PECAM1,PPARA,RAB33A,SELPLG,SERPINE1,SERPINE2,SERPINF1,SPHK1,SPON2,TCF4,THY1,TNFRSF11B,TNFRSF1A,TNFRSF9,ULBP2,VCA…	68
Cell-To-Cell Signaling and Interaction	Binding of blood cells	8.72e-11	Increased	2.793	ADORA1,ATP2A3,CALR,CD151,CD44,CD81,CEACAM1,CFH,CLU,CR2,DCN,ENG,FN1,GAS6,GP6,IL15,IL18,IL1R1,IL7R,ITGA2B,ITGA5,ITGB3,KIT,MITF,MRAS,NEDD9,NRP1,NT5E,OLR1,PECAM1,SELPLG,SERPINE1,SPON2,THY1,TNFRSF11B,TNFRSF1A,TNFRSF9,TRPV2,ULBP2	39
Cell-To-Cell Signaling and Interaction	Adhesion of blood cells	1.34e-10	Increased	2.955	ADORA1,ATP2A3,CD151,CD44,CD81,CEACAM1,CFH,CLU,CR2,DCN,FN1,GAS6,GP6,IL15,IL18,IL1R1,IL7R,ITGA2B,ITGA5,ITGB3,KIT,MITF,MRAS,NEDD9,NRP1,NT5E,OLR1,PECAM1,SELPLG,SERPINE1,SPON2,THY1,TNFRSF11B,TNFRSF1A,TNFRSF9,TRPV2	36
Cell-To-Cell Signaling and Interaction	Aggregation of cells	2.07e-16	Increased	3.081	ANGPTL2,ATP2A3,CD151,CD44,CDH11,CDH13,CDH2,CEACAM1,CFH,CLMP,CLU,CP,CSF3,EPHB1,FN1,GAS6,GP6,GPX3,IL15,ITGA2B,ITGA5,ITGB3,KIT,MMP1,MMP14,MMP3,MRAS,NCAM1,NRP1,OLR1,PCDHGC3,PDGFRB,PECAM1,PRKD1,SCARF2,SELPLG,SERPINE2,SERPINF1,TNFRSF1A,TNFRSF9,WNT5A	41
Cell-To-Cell Signaling and Interaction	Attachment of cells	4.48e-09	Increased	3.503	CALR,CD44,CDH13,DCN,ELN,ENG,EPHB1,FBLN5,FGFR1,FN1,ITGA5,ITGB3,MMP2,NEDD9,OLR1,SPARC,THY1,VCAN	18
Cell-To-Cell Signaling and Interaction,Cellular Assembly and Organization	Cell-cell contact	6.25e-11		1.962	ANXA9,APLP2,CALR,CD151,CD44,CD81,CDH11,CDH13,CDH2,CEACAM1,CLDN3,CLU,COL13A1,COL4A1,DACT1,EPHB1,FN1,GABBR2,GAS6,GFAP,GJA1,IL18,INHBA,ITGA5,ITGB3,JAM2,JUNB,MFSD2A,MMP14,MMP2,MMP3,NCAM1,NRXN3,NT5E,OLR1,OXTR,PCDHB14,PCDHGA12,PCDHGB5,PCDHGB7,PCDHGC3,PECAM1,SCARF2,SERPINF1,SLC30A2,TAFA2,THY1,TIMP3,TNFRSF11B,TNXB,WNT5A,WNT7A	52
Cell-To-Cell Signaling and Interaction,Cellular Movement	Recruitment of cells	3.24e-07		1.908	ALOX5,BCL3,CD44,CLU,CR2,CRYAB,CSF3,ENG,FGFR1,FN1,GP6,IL15,IL17RA,IL18,IL1R1,IL37,MMP1,MMP2,OLR1,PDCD1,PDGFRB,PECAM1,SELPLG,SERPINE1,SOD3,SPON2,THY1,TNFRSF1A,TNFRSF9	29
Cell-To-Cell Signaling and Interaction,Hematological System Development and Function	Activation of blood cells	1.47e-08		1.758	ADORA1,ALOX5,BCL3,CALR,CD44,CD81,CEACAM1,CFH,COL1A1,COL1A2,CR2,CSF3,CTSL,EGR2,FN1,GAS6,GJA1,GP6,HSP90B1,IL15,IL18,IL1R1,IL37,INHBA,ITGA2B,ITGA5,ITGB3,ITPR2,KIT,LTBP1,LYST,MFSD2A,MICA,MMP1,MRTFB,NT5E,PDCD1,PDCD1LG2,PECAM1,PPARA,RAB33A,SELPLG,SERPINE2,SERPINF1,SPON2,THY1,TNFRSF1A,TNFRSF9,ULBP2,VCAN,WNT4,WNT5A	52
[truncated: 129 more rows]

## Sheet: Diseases&Funct._HCC827 (TCFs)
¬© 2000-2020 QIAGEN. All rights reserved.
[truncated: 501 more rows]
