# Supplementary material for: Multiomics Analysis of Spatially Distinct Stromal Cells Reveals Tumor-Induced O-Glycosylation of the CDK4–pRB Axis in Fibroblasts at the Invasive Tumor Edge
Source: Oxford University Press journal article supplement (doi:10.1158/0008-5472.can-21-1705), 2021-12-01
Supplement: can-21-1705_supplementary_data_s4_supps5.xlsx [file can-21-1705_supplementary_data_s4_supps5.xlsx]

## Sheet: Position_Sequence_Byonic
Gene	Position_Sequence	Glycan	Raw_file
AAK1	1_S[+1021.35981]C[+57.02146]SDR	HexNAc(2)Hex(2)NeuAc(1)	2019_11_14_GB_TAFs_Glyco2_Direct24hr
ABCD3	1_S[+1021.35981]FLR	HexNAc(2)Hex(2)NeuAc(1)	2019_11_14_GB_TAFs_Glyco2_Direct24hr
ABCF1	1_S[+1021.35981]FLR	HexNAc(2)Hex(2)NeuAc(1)	2019_11_14_GB_TAFs_Glyco2_Direct24hr
ABCF1	1_S[+1238.41845]VMDK	HexNAc(1)Hex(1)NeuAc(3)	2019_11_14_GB_TAFs_Glyco1_CTLdirect
ABCF1	1_S[+1238.41845]VMDK	HexNAc(1)Hex(1)NeuAc(3)	2019_11_14_GB_TAFs_Glyco6_Direct24hr
ABCF1	1_S[+1312.45523]DIVQLR	HexNAc(2)Hex(2)NeuAc(2)	2019_11_14_GB_TAFs_Glyco3_CTLdirect
ACO2	1_S[+1312.45523]DIVQLR	HexNAc(2)Hex(2)NeuAc(2)	2019_11_14_GB_TAFs_Glyco3_CTLdirect
ACO2	1_S[+1312.45523]GPLT[+1021.35981]GWR	HexNAc(2)Hex(2)NeuAc(2)	2019_11_14_GB_TAFs_Glyco5_CTLdirect
ACTBL2	1_S[+1312.45523]GPLT[+1021.35981]GWR	HexNAc(2)Hex(2)NeuAc(2)	2019_11_14_GB_TAFs_Glyco6_Direct24hr
ACTBL2	1_S[+1312.45523]GPLT[+1021.35981]GWR	HexNAc(2)Hex(2)NeuAc(2)	2019_11_14_GB_TAFs_Glyco5_CTLdirect
ACTBL2	1_S[+203.07937]GTVTVAQQAQVVTT[+203.07937]VVGGVTK	HexNAc(1)	2019_11_14_GB_TAFs_Glyco2_Direct24hr
ACTBL2	1_S[+203.07937]HLVHGSSPGVM[+15.99492]GTSVATSASK	HexNAc(1)	2019_11_14_GB_TAFs_Glyco6_Direct24hr
ACTBL2	1_S[+203.07937]LQLT[+947.32303]GFQAYK	HexNAc(1)	2019_11_14_GB_TAFs_Glyco1_CTLdirect
ACTBL2	1_S[+365.13220]FPDFPT[+365.13220]PGVVFR	HexNAc(1)Hex(1)	2019_11_14_GB_TAFs_Glyco4_Direct24hr
ACTBL2	1_S[+365.13220]LAPDRS[+365.13220]DDEHDPLDNTSR	HexNAc(1)Hex(1)	2019_11_14_GB_TAFs_Glyco1_CTLdirect
ACTBL2	1_S[+365.13220]VQTTLQTDEVK	HexNAc(1)Hex(1)	2019_11_14_GB_TAFs_Glyco3_CTLdirect
ACTBL2	1_S[+406.15875]S[+406.15875]LGSLQTPEAVTTR	HexNAc(2)	2019_11_14_GB_TAFs_Glyco5_CTLdirect
ACTC1	1_S[+406.15875]VIS[+406.15875]FVC[+57.02146]RPEARPTNR	HexNAc(2)	2019_11_14_GB_TAFs_Glyco5_CTLdirect
ACTC1	1_S[+406.15875]VIS[+406.15875]FVC[+57.02146]RPEARPTNR	HexNAc(2)	2019_11_14_GB_TAFs_Glyco6_Direct24hr
ACTC1	1_S[+568.21157]LS[+568.21157]MELTIQK	HexNAc(2)Hex(1)	2019_11_14_GB_TAFs_Glyco4_Direct24hr
ACTC1	1_S[+656.22761]LHLPK	HexNAc(1)Hex(1)NeuAc(1)	2019_11_14_GB_TAFs_Glyco2_Direct24hr
ACTG1	1_S[+947.32303]EALPTDLPAPSAPDLTEPK	HexNAc(1)Hex(1)NeuAc(2)	2019_11_14_GB_TAFs_Glyco6_Direct24hr
ACTG1	1_S[+947.32303]QT[+203.07937]EK	HexNAc(1)Hex(1)NeuAc(2)	2019_11_14_GB_TAFs_Glyco2_Direct24hr
ACTG1	1_T[+1021.35981]APQT[+1312.45523]PVLQK	HexNAc(2)Hex(2)NeuAc(1)	2019_11_14_GB_TAFs_Glyco6_Direct24hr
ACTG1	1_T[+1021.35981]LVAHYPPVQVLFEK	HexNAc(2)Hex(2)NeuAc(1)	2019_11_14_GB_TAFs_Glyco4_Direct24hr
ACTG1	1_T[+1238.41845]NFFLLLQAVNS[+203.07937]HC[+57.02146]FPAFLAIPPT[+1312.45523]QFK	HexNAc(1)Hex(1)NeuAc(3)	2019_11_14_GB_TAFs_Glyco2_Direct24hr
ACTG1	1_T[+1238.41845]NFFLLLQAVNS[+568.21157]HC[+57.02146]FPAFLAIPPT[+947.32303]QFK	HexNAc(1)Hex(1)NeuAc(3)	2019_11_14_GB_TAFs_Glyco2_Direct24hr
ACTG1	1_T[+1238.41845]PEGLQESAN[+0.98402]VK	HexNAc(1)Hex(1)NeuAc(3)	2019_11_14_GB_TAFs_Glyco2_Direct24hr
ACTN4	1_T[+1238.41845]PEGLQESAN[+0.98402]VK	HexNAc(1)Hex(1)NeuAc(3)	2019_11_14_GB_TAFs_Glyco2_Direct24hr
ACTR1A	1_T[+1238.41845]S[+1238.41845]MS[+1021.35981]K	HexNAc(1)Hex(1)NeuAc(3)	2019_11_14_GB_TAFs_Glyco4_Direct24hr
ACTR1A	1_T[+1312.45523]C[+57.02146]S[+568.21157]PK	HexNAc(2)Hex(2)NeuAc(2)	2019_11_14_GB_TAFs_Glyco2_Direct24hr
ACTR3	1_T[+1312.45523]C[+57.02146]S[+568.21157]PK	HexNAc(2)Hex(2)NeuAc(2)	2019_11_14_GB_TAFs_Glyco2_Direct24hr
ADAR	1_T[+1312.45523]M[+15.99492]R	HexNAc(2)Hex(2)NeuAc(2)	2019_11_14_GB_TAFs_Glyco4_Direct24hr
AGFG1	1_T[+1312.45523]PGPK	HexNAc(2)Hex(2)NeuAc(2)	2019_11_14_GB_TAFs_Glyco4_Direct24hr
AGFG1	1_T[+203.07937]ETGATETVTPSEAPVLAAEPEADKGTVLALTENNFDDTIAEGITFIK	HexNAc(1)	2019_11_14_GB_TAFs_Glyco2_Direct24hr
AGFG1	1_T[+203.07937]ETGATETVTPSEAPVLAAEPEADKGTVLALTENNFDDTIAEGITFIK	HexNAc(1)	2019_11_14_GB_TAFs_Glyco4_Direct24hr
AGPS	1_T[+203.07937]ETGATETVTPSEAPVLAAEPEADKGTVLALTENNFDDTIAEGITFIK	HexNAc(1)	2019_11_14_GB_TAFs_Glyco2_Direct24hr
AGPS	1_T[+203.07937]ETGATETVTPSEAPVLAAEPEADKGTVLALTENNFDDTIAEGITFIK	HexNAc(1)	2019_11_14_GB_TAFs_Glyco4_Direct24hr
AGPS	1_T[+203.07937]LHS[+406.15875]T[+947.32303]FQPNISQGK	HexNAc(1)	2019_11_14_GB_TAFs_Glyco4_Direct24hr
AHCTF1	1_T[+365.13220]ETGATETVTPSEAPVLAAEPEADKGTVLALTENNFDDTIAEGITFIK	HexNAc(1)Hex(1)	2019_11_14_GB_TAFs_Glyco3_CTLdirect
AHNAK	1_T[+365.13220]ETGATETVTPSEAPVLAAEPEADKGTVLALTENNFDDTIAEGITFIK	HexNAc(1)Hex(1)	2019_11_14_GB_TAFs_Glyco4_Direct24hr
AHNAK	1_T[+365.13220]ETGATETVTPSEAPVLAAEPEADKGTVLALTENNFDDTIAEGITFIK	HexNAc(1)Hex(1)	2019_11_14_GB_TAFs_Glyco3_CTLdirect
AK2	1_T[+406.15875]ETGATETVTPSEAPVLAAEPEADKGTVLALTENNFDDTIAEGITFIK	HexNAc(2)	2019_11_14_GB_TAFs_Glyco3_CTLdirect
AK2	1_T[+568.21157]ALLS[+656.22761]LFGIPLWYHSQSPR	HexNAc(2)Hex(1)	2019_11_14_GB_TAFs_Glyco1_CTLdirect
AKAP1	1_T[+568.21157]LPLFYGSIVR	HexNAc(2)Hex(1)	2019_11_14_GB_TAFs_Glyco1_CTLdirect
AKAP12	1_T[+568.21157]LPLFYGSIVR	HexNAc(2)Hex(1)	2019_11_14_GB_TAFs_Glyco1_CTLdirect
AKAP12	1_T[+656.22761]ETGATETVTPSEAPVLAAEPEADKGTVLALTENNFDDTIAEGITFIK	HexNAc(1)Hex(1)NeuAc(1)	2019_11_14_GB_TAFs_Glyco3_CTLdirect
ALDH1B1	1_T[+656.22761]ETGATETVTPSEAPVLAAEPEADKGTVLALTENNFDDTIAEGITFIK	HexNAc(1)Hex(1)NeuAc(1)	2019_11_14_GB_TAFs_Glyco4_Direct24hr
ALDH1B1	1_T[+656.22761]ETGATETVTPSEAPVLAAEPEADKGTVLALTENNFDDTIAEGITFIK	HexNAc(1)Hex(1)NeuAc(1)	2019_11_14_GB_TAFs_Glyco3_CTLdirect
ALDH1B1	1_T[+656.22761]IIQSPYEK	HexNAc(1)Hex(1)NeuAc(1)	2019_11_14_GB_TAFs_Glyco2_Direct24hr
ALDH1B1	1_T[+947.32303]LC[+57.02146]EC[+57.02146]K	HexNAc(1)Hex(1)NeuAc(2)	2019_11_14_GB_TAFs_Glyco4_Direct24hr
ALDH1B1	1_T[+947.32303]S[+1312.45523]MS[+1238.41845]K	HexNAc(1)Hex(1)NeuAc(2)	2019_11_14_GB_TAFs_Glyco4_Direct24hr
ALDH2	10_AADAEAEVAS[+365.13220]LNR	HexNAc(1)Hex(1)	2019_11_14_GB_TAFs_Glyco2_Direct24hr
ALDH2	10_AADAEAEVAS[+568.21157]LNR	HexNAc(2)Hex(1)	2019_11_14_GB_TAFs_Glyco3_CTLdirect
ALDH2	10_AADAEAEVAS[+568.21157]LNR	HexNAc(2)Hex(1)	2019_11_14_GB_TAFs_Glyco4_Direct24hr
ANKRD13A	10_AADAEAEVAS[+568.21157]LNR	HexNAc(2)Hex(1)	2019_11_14_GB_TAFs_Glyco3_CTLdirect
ANKRD17	10_AADAEAEVAS[+568.21157]LNR	HexNAc(2)Hex(1)	2019_11_14_GB_TAFs_Glyco4_Direct24hr
ANKRD17	10_AADAEAEVAS[+568.21157]LNR	HexNAc(2)Hex(1)	2019_11_14_GB_TAFs_Glyco1_CTLdirect
ANKRD17	10_DYNEAYN[+0.98402]YYT[+947.32303]KAIDMC[+57.02146]PK	HexNAc(1)Hex(1)NeuAc(2)	2019_11_14_GB_TAFs_Glyco2_Direct24hr
ANKRD17	10_EQVEEDNEVS[+203.07937]SGLK	HexNAc(1)	2019_11_14_GB_TAFs_Glyco3_CTLdirect
ANKRD17	10_FDN[+0.98402]PAAVS[+203.07937]PT[+1021.35981]PT[+406.15875]R	HexNAc(2)Hex(2)NeuAc(1)	2019_11_14_GB_TAFs_Glyco4_Direct24hr
ANKRD17	10_FLDGELPLDS[+568.21157]FIDVYQSK	HexNAc(2)Hex(1)	2019_11_14_GB_TAFs_Glyco3_CTLdirect
ANKRD17	10_GVTQYYAYVT[+406.15875]ER	HexNAc(2)	2019_11_14_GB_TAFs_Glyco2_Direct24hr
ANKRD17	10_ISPWTGRFYS[+1021.35981]LLDPSYAK	HexNAc(2)Hex(2)NeuAc(1)	2019_11_14_GB_TAFs_Glyco2_Direct24hr
ANPEP	10_ISPWTGRFYS[+1021.35981]LLDPSYAK	HexNAc(2)Hex(2)NeuAc(1)	2019_11_14_GB_TAFs_Glyco2_Direct24hr
ANPEP	10_KDLYAN[+0.98402]NVLS[+406.15875]GGT[+568.21157]TM[+15.99492]YPGIADR	HexNAc(2)	2019_11_14_GB_TAFs_Glyco6_Direct24hr
ANPEP	10_KDLYANN[+0.98402]VLS[+406.15875]GGT[+568.21157]TM[+15.99492]YPGIADR	HexNAc(2)	2019_11_14_GB_TAFs_Glyco6_Direct24hr
ANPEP	10_KDLYANT[+203.07937]VLS[+406.15875]GGS[+406.15875]TMYPGIADR	HexNAc(2)	2019_11_14_GB_TAFs_Glyco1_CTLdirect
ANPEP	10_KKPN[+0.98402]ATAEPT[+656.22761]PPDR	HexNAc(1)Hex(1)NeuAc(1)	2019_11_14_GB_TAFs_Glyco3_CTLdirect
ANPEP	10_KKPN[+0.98402]ATAEPT[+656.22761]PPDR	HexNAc(1)Hex(1)NeuAc(1)	2019_11_14_GB_TAFs_Glyco4_Direct24hr
ANPEP	10_KKPN[+0.98402]ATAEPT[+656.22761]PPDR	HexNAc(1)Hex(1)NeuAc(1)	2019_11_14_GB_TAFs_Glyco5_CTLdirect
ANPEP	10_KKPN[+0.98402]ATAEPT[+656.22761]PPDR	HexNAc(1)Hex(1)NeuAc(1)	2019_11_14_GB_TAFs_Glyco6_Direct24hr
ANXA5	10_KKPN[+0.98402]ATAEPT[+656.22761]PPDR	HexNAc(1)Hex(1)NeuAc(1)	2019_11_14_GB_TAFs_Glyco6_Direct24hr
AP1B1	10_KKPN[+0.98402]ATAEPT[+656.22761]PPDR	HexNAc(1)Hex(1)NeuAc(1)	2019_11_14_GB_TAFs_Glyco6_Direct24hr
AP1M1	10_KKPN[+0.98402]ATAEPT[+656.22761]PPDR	HexNAc(1)Hex(1)NeuAc(1)	2019_11_14_GB_TAFs_Glyco3_CTLdirect
AP2A1	10_KKPN[+0.98402]ATAEPT[+656.22761]PPDR	HexNAc(1)Hex(1)NeuAc(1)	2019_11_14_GB_TAFs_Glyco3_CTLdirect
AP2B1	10_KKPN[+0.98402]ATAEPT[+656.22761]PPDR	HexNAc(1)Hex(1)NeuAc(1)	2019_11_14_GB_TAFs_Glyco3_CTLdirect
AP2M1	10_KKPN[+0.98402]ATAEPT[+656.22761]PPDR	HexNAc(1)Hex(1)NeuAc(1)	2019_11_14_GB_TAFs_Glyco4_Direct24hr
AP2M1	10_KKPN[+0.98402]ATAEPT[+656.22761]PPDR	HexNAc(1)Hex(1)NeuAc(1)	2019_11_14_GB_TAFs_Glyco5_CTLdirect
API5	10_KKPN[+0.98402]ATAEPT[+656.22761]PPDR	HexNAc(1)Hex(1)NeuAc(1)	2019_11_14_GB_TAFs_Glyco6_Direct24hr
APRT	10_KKPN[+0.98402]ATAEPT[+656.22761]PPDR	HexNAc(1)Hex(1)NeuAc(1)	2019_11_14_GB_TAFs_Glyco6_Direct24hr
APRT	10_KKPNATAEPT[+656.22761]PPDR	HexNAc(1)Hex(1)NeuAc(1)	2019_11_14_GB_TAFs_Glyco2_Direct24hr
AQR	10_KLANSEPVGT[+203.07937]QT[+568.21157]AK	HexNAc(1)	2019_11_14_GB_TAFs_Glyco4_Direct24hr
ARFGAP3	10_KLANSEPVGT[+203.07937]QT[+568.21157]AK	HexNAc(1)	2019_11_14_GB_TAFs_Glyco4_Direct24hr
ARFGAP3	10_LEVTDGPPAT[+947.32303]PAYWDGEKEVLAVAR	HexNAc(1)Hex(1)NeuAc(2)	2019_11_14_GB_TAFs_Glyco6_Direct24hr
ARFGAP3	10_LFQQIYS[+568.21157]DGS[+1312.45523]DEVK	HexNAc(2)Hex(2)NeuAc(2)	2019_11_14_GB_TAFs_Glyco2_Direct24hr
ASPSCR1	10_LVSPGSAN[+0.98402]ET[+1021.35981]SSILVESVTR	HexNAc(2)Hex(2)NeuAc(1)	2019_11_14_GB_TAFs_Glyco6_Direct24hr
ATP2A2	10_N[+0.98402]PTIVNFPIT[+568.21157]NVDLR	HexNAc(2)Hex(1)	2019_11_14_GB_TAFs_Glyco5_CTLdirect
ATP2A2	10_PGFTSLPGS[+406.15875]T[+406.15875]M[+15.99492]TPPPSGPNPYAR	HexNAc(2)	2019_11_14_GB_TAFs_Glyco3_CTLdirect
ATP2A2	10_PVDPYSRM[+15.99492]QS[+1021.35981]TYNYNMR	HexNAc(2)Hex(2)NeuAc(1)	2019_11_14_GB_TAFs_Glyco2_Direct24hr
ATP2A2	10_SET[+203.07937]VVERMLS[+656.22761]NWMSIC[+57.02146]LYQYLK	HexNAc(1)Hex(1)NeuAc(1)	2019_11_14_GB_TAFs_Glyco4_Direct24hr
ATP5F1B	10_SLEM[+15.99492]LELGLS[+1312.45523]EAQVMMALS[+1312.45523]NHLNAVESEK	HexNAc(2)Hex(2)NeuAc(2)	2019_11_14_GB_TAFs_Glyco6_Direct24hr
ATP6V0D1	10_SVEN[+0.98402]LATATT[+203.07937]T[+656.22761]LTSLAQLLGK	HexNAc(1)	2019_11_14_GB_TAFs_Glyco4_Direct24hr
BAZ1B	10_TFVTYTVYVS[+365.13220]MIALER	HexNAc(1)Hex(1)	2019_11_14_GB_TAFs_Glyco1_CTLdirect
BLMH	10_TM[+15.99492]AVTPGTTT[+203.07937]LPATVK	HexNAc(1)	2019_11_14_GB_TAFs_Glyco1_CTLdirect
BLMH	10_TM[+15.99492]AVTPGTTT[+203.07937]LPATVK	HexNAc(1)	2019_11_14_GB_TAFs_Glyco3_CTLdirect
BLVRA	10_TM[+15.99492]AVTPGTTT[+203.07937]LPATVK	HexNAc(1)	2019_11_14_GB_TAFs_Glyco4_Direct24hr
CACYBP	10_TM[+15.99492]AVTPGTTT[+406.15875]LPATVK	HexNAc(2)	2019_11_14_GB_TAFs_Glyco2_Direct24hr
CACYBP	10_VAALQTVGPT[+947.32303]AGPAPK	HexNAc(1)Hex(1)NeuAc(2)	2019_11_14_GB_TAFs_Glyco6_Direct24hr
CALR	10_VAALQTVGPT[+947.32303]AGPAPK	HexNAc(1)Hex(1)NeuAc(2)	2019_11_14_GB_TAFs_Glyco6_Direct24hr
CAND1	10_VAALQTVGPT[+947.32303]AGPAPK	HexNAc(1)Hex(1)NeuAc(2)	2019_11_14_GB_TAFs_Glyco6_Direct24hr
CAND1	10_VIQIATSSST[+406.15875]AKNLM[+15.99492]QFHTVGTK	HexNAc(2)	2019_11_14_GB_TAFs_Glyco2_Direct24hr
CAND1	10_YHLT[+568.21157]EPGLAS[+568.21157]R	HexNAc(2)Hex(1)	2019_11_14_GB_TAFs_Glyco4_Direct24hr
CASP1	11_AIFLADGKVFT[+568.21157]T[+568.21157]GFS[+568.21157]R	HexNAc(2)Hex(1)	2019_11_14_GB_TAFs_Glyco5_CTLdirect
CASP1	11_ALAKC[+57.02146]EKYMLT[+203.07937]HQELASDGEIETK	HexNAc(1)	2019_11_14_GB_TAFs_Glyco4_Direct24hr
CBWD3	11_ATGEADVHFET[+365.13220]HEDAVAAM[+15.99492]LK	HexNAc(1)Hex(1)	2019_11_14_GB_TAFs_Glyco2_Direct24hr
CDK4	11_DM[+15.99492]VN[+0.98402]VC[+57.02146]ETNLS[+1021.35981]K	HexNAc(2)Hex(2)NeuAc(1)	2019_11_14_GB_TAFs_Glyco5_CTLdirect
CDK4	11_EFHHGPDPTDT[+203.07937]APGEQAQDVASSPPESSFQK	HexNAc(1)	2019_11_14_GB_TAFs_Glyco1_CTLdirect
CHAMP1	11_EFHHGPDPTDT[+203.07937]APGEQAQDVASSPPESSFQK	HexNAc(1)	2019_11_14_GB_TAFs_Glyco5_CTLdirect
CNOT1	11_EFHHGPDPTDT[+203.07937]APGEQAQDVASSPPESSFQK	HexNAc(1)	2019_11_14_GB_TAFs_Glyco5_CTLdirect
CNOT1	11_EQVLEPMLN[+0.98402]GT[+406.15875]EKT[+656.22761]PPLITDYR	HexNAc(2)	2019_11_14_GB_TAFs_Glyco4_Direct24hr
CNOT1	11_FVLALLDLFDS[+203.07937]EDPR	HexNAc(1)	2019_11_14_GB_TAFs_Glyco6_Direct24hr
CNOT1	11_GAPNKEET[+203.07937]PAT[+203.07937]ESPDTGLYYHR	HexNAc(1)	2019_11_14_GB_TAFs_Glyco2_Direct24hr
CNOT1	11_GAPNKEET[+203.07937]PAT[+203.07937]ESPDTGLYYHR	HexNAc(1)	2019_11_14_GB_TAFs_Glyco5_CTLdirect
CNOT1	11_GAPNKEET[+203.07937]PAT[+203.07937]ESPDTGLYYHR	HexNAc(1)	2019_11_14_GB_TAFs_Glyco6_Direct24hr
COG5	11_GAPNKEET[+203.07937]PAT[+203.07937]ESPDTGLYYHR	HexNAc(1)	2019_11_14_GB_TAFs_Glyco6_Direct24hr
COL1A1	11_GAPNKEET[+203.07937]PAT[+203.07937]ESPDTGLYYHR	HexNAc(1)	2019_11_14_GB_TAFs_Glyco6_Direct24hr
COL1A1	11_GAPNKEETPAT[+203.07937]ESPDTGLYYHR	HexNAc(1)	2019_11_14_GB_TAFs_Glyco6_Direct24hr
COL6A3	11_GAPNKEETPAT[+406.15875]ESPDTGLYYHR	HexNAc(2)	2019_11_14_GB_TAFs_Glyco2_Direct24hr
COL6A3	11_GAPNKEETPAT[+406.15875]ESPDTGLYYHR	HexNAc(2)	2019_11_14_GB_TAFs_Glyco3_CTLdirect
COPS3	11_GAPNKEETPAT[+406.15875]ESPDTGLYYHR	HexNAc(2)	2019_11_14_GB_TAFs_Glyco2_Direct24hr
CORO1B	11_GAPNKEETPAT[+406.15875]ESPDTGLYYHR	HexNAc(2)	2019_11_14_GB_TAFs_Glyco3_CTLdirect
CORO1B	11_GAPNKEETPAT[+406.15875]ESPDTGLYYHR	HexNAc(2)	2019_11_14_GB_TAFs_Glyco6_Direct24hr
COX5A	11_GAPNKEETPAT[+947.32303]ESPDTGLYYHR	HexNAc(1)Hex(1)NeuAc(2)	2019_11_14_GB_TAFs_Glyco3_CTLdirect
COX5A	11_GKELDSNPFAS[+947.32303]LVFYWEPLN[+0.98402]R	HexNAc(1)Hex(1)NeuAc(2)	2019_11_14_GB_TAFs_Glyco5_CTLdirect
COX5A	11_GKELDSNPFAS[+947.32303]LVFYWEPLNR	HexNAc(1)Hex(1)NeuAc(2)	2019_11_14_GB_TAFs_Glyco5_CTLdirect
COX5A	11_GLVQALQT[+1312.45523]KVT[+1238.41845]QQGLK	HexNAc(1)Hex(1)NeuAc(3)	2019_11_14_GB_TAFs_Glyco2_Direct24hr
DARS	11_IASHYYITN[+0.98402]DT[+568.21157]VQT[+365.13220]YNQLLK	HexNAc(2)Hex(1)	2019_11_14_GB_TAFs_Glyco1_CTLdirect
DCP1A	11_IQEIIEQLDVT[+1021.35981]TSEYEK	HexNAc(2)Hex(2)NeuAc(1)	2019_11_14_GB_TAFs_Glyco4_Direct24hr
DCP1A	11_LC[+57.02146]YFTLPFGES[+406.15875]QVAIC[+57.02146]DGNFTIPDNSR	HexNAc(2)	2019_11_14_GB_TAFs_Glyco1_CTLdirect
DCP1A	11_LISLTDEN[+0.98402]ALS[+1021.35981]GNEELTVK	HexNAc(2)Hex(2)NeuAc(1)	2019_11_14_GB_TAFs_Glyco3_CTLdirect
DCP1A	11_LISLTDEN[+0.98402]ALS[+1021.35981]GNEELTVK	HexNAc(2)Hex(2)NeuAc(1)	2019_11_14_GB_TAFs_Glyco5_CTLdirect
DCP1A	11_LISLTDENALS[+1021.35981]GNEELTVK	HexNAc(2)Hex(2)NeuAc(1)	2019_11_14_GB_TAFs_Glyco1_CTLdirect
DCP1A	11_LISLTDENALS[+1021.35981]GNEELTVK	HexNAc(2)Hex(2)NeuAc(1)	2019_11_14_GB_TAFs_Glyco3_CTLdirect
DCP1A	11_LISLTDENALS[+1021.35981]GNEELTVK	HexNAc(2)Hex(2)NeuAc(1)	2019_11_14_GB_TAFs_Glyco4_Direct24hr
DCP1A	11_LISLTDENALS[+1021.35981]GNEELTVK	HexNAc(2)Hex(2)NeuAc(1)	2019_11_14_GB_TAFs_Glyco5_CTLdirect
DCP1A	11_LISLTDENALS[+1021.35981]GNEELTVK	HexNAc(2)Hex(2)NeuAc(1)	2019_11_14_GB_TAFs_Glyco6_Direct24hr
DCP1A	11_LLSDFLDS[+406.15875]EVS[+406.15875]ELR	HexNAc(2)	2019_11_14_GB_TAFs_Glyco5_CTLdirect
DCP1A	11_NAALFALGQFS[+406.15875]ENLQPHIS[+1021.35981]S[+406.15875]YSR	HexNAc(2)	2019_11_14_GB_TAFs_Glyco2_Direct24hr
DCP1A	11_PAPPEKPSPPT[+406.15875]VAPLT[+406.15875]PDGK	HexNAc(2)	2019_11_14_GB_TAFs_Glyco3_CTLdirect
DCP1A	11_PENIGYPFLVS[+406.15875]VPASR	HexNAc(2)	2019_11_14_GB_TAFs_Glyco2_Direct24hr
DCP1A	11_QIYN[+0.98402]PPSGKYS[+568.21157]SNLGNFNYEQR	HexNAc(2)Hex(1)	2019_11_14_GB_TAFs_Glyco2_Direct24hr
DCP1A	11_QVNVVAKAM[+15.99492]GT[+406.15875]LGVS[+203.07937]LSSC[+57.02146]SVPGSK	HexNAc(2)	2019_11_14_GB_TAFs_Glyco2_Direct24hr
DCP1A	11_QYLTFKPQTFT[+947.32303]YHDPVLRPGILGNFEPK	HexNAc(1)Hex(1)NeuAc(2)	2019_11_14_GB_TAFs_Glyco4_Direct24hr
DCP1A	11_SAASYALGS[+406.15875]IS[+656.22761]VGNLPEYLPFVLQEITSQPK	HexNAc(1)Hex(1)NeuAc(1)	2019_11_14_GB_TAFs_Glyco6_Direct24hr
DCP1A	11_SAASYALGS[+656.22761]IS[+406.15875]VGNLPEYLPFVLQEITSQPK	HexNAc(2)	2019_11_14_GB_TAFs_Glyco6_Direct24hr
DCP1A	11_SVEN[+0.98402]LATATT[+203.07937]T[+656.22761]LTSLAQLLGK	HexNAc(1)Hex(1)NeuAc(1)	2019_11_14_GB_TAFs_Glyco4_Direct24hr
DCP1A	11_TAAAQVGTSVS[+203.07937]SATNTSTRPIITVHK	HexNAc(1)	2019_11_14_GB_TAFs_Glyco1_CTLdirect
DCP1A	11_TINVYPN[+0.98402]FRPT[+1238.41845]PK	HexNAc(1)Hex(1)NeuAc(3)	2019_11_14_GB_TAFs_Glyco4_Direct24hr
DCP1A	11_VFPPDEIEQVS[+947.32303]NK	HexNAc(1)Hex(1)NeuAc(2)	2019_11_14_GB_TAFs_Glyco6_Direct24hr
DCP1A	11_VIIIQAC[+57.02146]RGDS[+947.32303]PGVVWFK	HexNAc(1)Hex(1)NeuAc(2)	2019_11_14_GB_TAFs_Glyco1_CTLdirect
DCP1A	11_VYFMKQT[+1021.35981]IGNS[+1021.35981]C[+57.02146]GT[+365.13220]IGLIHAVANNQDK	HexNAc(2)Hex(2)NeuAc(1)	2019_11_14_GB_TAFs_Glyco2_Direct24hr
DCP1A	11_YLIANATN[+0.98402]PES[+568.21157]K	HexNAc(2)Hex(1)	2019_11_14_GB_TAFs_Glyco4_Direct24hr
DCP1A	11_YLYEEYLQAFT[+1312.45523]YYKMGNLDNR	HexNAc(2)Hex(2)NeuAc(2)	2019_11_14_GB_TAFs_Glyco3_CTLdirect
DCP1A	11_YTPTSPSYSPS[+406.15875]S[+1021.35981]PEYTPTSPK	HexNAc(2)	2019_11_14_GB_TAFs_Glyco1_CTLdirect
DCP1A	12_ADVTTAFPTLGT[+406.15875]DQVSELVPGK	HexNAc(2)	2019_11_14_GB_TAFs_Glyco6_Direct24hr
DCP1A	12_AHFNLDESGVLS[+656.22761]LDR	HexNAc(1)Hex(1)NeuAc(1)	2019_11_14_GB_TAFs_Glyco5_CTLdirect
DCPS	12_AIFLADGKVFT[+568.21157]T[+568.21157]GFS[+568.21157]R	HexNAc(2)Hex(1)	2019_11_14_GB_TAFs_Glyco5_CTLdirect
DDAH2	12_AIYDTPC[+57.02146]IQAES[+203.07937]EK	HexNAc(1)	2019_11_14_GB_TAFs_Glyco2_Direct24hr
DDX23	12_AIYDTPC[+57.02146]IQAES[+203.07937]EK	HexNAc(1)	2019_11_14_GB_TAFs_Glyco3_CTLdirect
DDX6	12_AIYDTPC[+57.02146]IQAES[+203.07937]EK	HexNAc(1)	2019_11_14_GB_TAFs_Glyco2_Direct24hr
DDX6	12_AIYDTPC[+57.02146]IQAES[+203.07937]EK	HexNAc(1)	2019_11_14_GB_TAFs_Glyco3_CTLdirect
DDX6	12_AIYDTPC[+57.02146]IQAES[+203.07937]EK	HexNAc(1)	2019_11_14_GB_TAFs_Glyco1_CTLdirect
DECR1	12_ANVDIS[+203.07937]APKVDT[+656.22761]NAPDLSLEGPEGK	HexNAc(1)Hex(1)NeuAc(1)	2019_11_14_GB_TAFs_Glyco6_Direct24hr
DECR1	12_APLAGQVST[+203.07937]M[+15.99492]VT[+406.15875]TSTTTTVAK	HexNAc(2)	2019_11_14_GB_TAFs_Glyco5_CTLdirect
DECR1	12_APLAGQVSTM[+15.99492]VT[+406.15875]TSTTTTVAK	HexNAc(2)	2019_11_14_GB_TAFs_Glyco1_CTLdirect
DHX15	12_APLAGQVSTM[+15.99492]VT[+406.15875]TSTTTTVAK	HexNAc(2)	2019_11_14_GB_TAFs_Glyco1_CTLdirect
DHX15	12_ATATISAKPQIT[+656.22761]NPK	HexNAc(1)Hex(1)NeuAc(1)	2019_11_14_GB_TAFs_Glyco1_CTLdirect
DHX15	12_DFQTLENWM[+15.99492]LQT[+203.07937]LNEEPVTPEPEVEPPSAPELK	HexNAc(1)	2019_11_14_GB_TAFs_Glyco2_Direct24hr
DHX15	12_DFQTLENWM[+15.99492]LQT[+203.07937]LNEEPVTPEPEVEPPSAPELK	HexNAc(1)	2019_11_14_GB_TAFs_Glyco4_Direct24hr
DHX30	12_DFQTLENWM[+15.99492]LQT[+203.07937]LNEEPVTPEPEVEPPSAPELK	HexNAc(1)	2019_11_14_GB_TAFs_Glyco6_Direct24hr
DHX30	12_DFQTLENWM[+15.99492]LQT[+203.07937]LNEEPVTPEPEVEPPSAPELK	HexNAc(1)	2019_11_14_GB_TAFs_Glyco2_Direct24hr
DIAPH1	12_DFQTLENWM[+15.99492]LQT[+203.07937]LNEEPVTPEPEVEPPSAPELK	HexNAc(1)	2019_11_14_GB_TAFs_Glyco4_Direct24hr
DNAJC13	12_DFQTLENWM[+15.99492]LQT[+203.07937]LNEEPVTPEPEVEPPSAPELK	HexNAc(1)	2019_11_14_GB_TAFs_Glyco6_Direct24hr
DNAJC13	12_DFQTLENWM[+15.99492]LQT[+365.13220]LNEEPVTPEPEVEPPSAPELK	HexNAc(1)Hex(1)	2019_11_14_GB_TAFs_Glyco5_CTLdirect
DNAJC7	12_DFQTLENWM[+15.99492]LQT[+365.13220]LNEEPVTPEPEVEPPSAPELK	HexNAc(1)Hex(1)	2019_11_14_GB_TAFs_Glyco5_CTLdirect
DNAJC7	12_DFQTLENWM[+15.99492]LQT[+947.32303]LNEEPVTPEPEVEPPSAPELK	HexNAc(1)Hex(1)NeuAc(2)	2019_11_14_GB_TAFs_Glyco2_Direct24hr
DNMT1	12_DFQTLENWM[+15.99492]LQT[+947.32303]LNEEPVTPEPEVEPPSAPELK	HexNAc(1)Hex(1)NeuAc(2)	2019_11_14_GB_TAFs_Glyco2_Direct24hr
DNMT1	12_DLYAN[+0.98402]TVLS[+568.21157]GGT[+406.15875]T[+656.22761]MYPGIADR	HexNAc(2)	2019_11_14_GB_TAFs_Glyco4_Direct24hr
DNPEP	12_DLYAN[+0.98402]TVLS[+568.21157]GGT[+656.22761]T[+406.15875]MYPGIADR	HexNAc(1)Hex(1)NeuAc(1)	2019_11_14_GB_TAFs_Glyco4_Direct24hr
DOHH	12_DPIQPPELQLVT[+568.21157]PMAEGDT[+365.13220]GLPR	HexNAc(2)Hex(1)	2019_11_14_GB_TAFs_Glyco2_Direct24hr
DR1	12_DPIQPPELQLVT[+568.21157]PMAEGDT[+365.13220]GLPR	HexNAc(2)Hex(1)	2019_11_14_GB_TAFs_Glyco2_Direct24hr
DST	12_EVGIPPEQSLET[+947.32303]AKAVKERYSYVC[+57.02146]PDLVK	HexNAc(1)Hex(1)NeuAc(2)	2019_11_14_GB_TAFs_Glyco6_Direct24hr
DST	12_EYEVMYSSSC[+57.02146]ET[+1021.35981]T[+406.15875]R	HexNAc(2)Hex(2)NeuAc(1)	2019_11_14_GB_TAFs_Glyco4_Direct24hr
DST	12_FDN[+0.98402]PAAVS[+203.07937]PT[+1021.35981]PT[+406.15875]R	HexNAc(2)	2019_11_14_GB_TAFs_Glyco4_Direct24hr
DST	12_GLGGPGAIAWIS[+406.15875]QAFDDDSALLK	HexNAc(2)	2019_11_14_GB_TAFs_Glyco5_CTLdirect
DST	12_GQLEQIT[+203.07937]GKGAS[+406.15875]GT[+406.15875]FQLK	HexNAc(2)	2019_11_14_GB_TAFs_Glyco5_CTLdirect
DTD1	12_IIPAIWFRYDLS[+406.15875]PIT[+203.07937]VK	HexNAc(2)	2019_11_14_GB_TAFs_Glyco3_CTLdirect
DTD1	12_ILDSFAAAPVPT[+203.07937]TTLVLK	HexNAc(1)	2019_11_14_GB_TAFs_Glyco1_CTLdirect
DTD1	12_ILDSFAAAPVPT[+203.07937]TTLVLK	HexNAc(1)	2019_11_14_GB_TAFs_Glyco2_Direct24hr
DTX3L	12_ILDSFAAAPVPT[+203.07937]TTLVLK	HexNAc(1)	2019_11_14_GB_TAFs_Glyco4_Direct24hr
DTX3L	12_ILDSFAAAPVPT[+203.07937]TTLVLK	HexNAc(1)	2019_11_14_GB_TAFs_Glyco5_CTLdirect
DTX3L	12_ILDSFAAAPVPT[+203.07937]TTLVLK	HexNAc(1)	2019_11_14_GB_TAFs_Glyco6_Direct24hr
DYNC1H1	12_ILDSFAAAPVPT[+203.07937]TTLVLK	HexNAc(1)	2019_11_14_GB_TAFs_Glyco2_Direct24hr
DYNC1H1	12_ILDSFAAAPVPT[+203.07937]TTLVLK	HexNAc(1)	2019_11_14_GB_TAFs_Glyco3_CTLdirect
DYNC1H1	12_ILDSFAAAPVPT[+203.07937]TTLVLK	HexNAc(1)	2019_11_14_GB_TAFs_Glyco4_Direct24hr
DYNC1H1	12_ILDSFAAAPVPT[+203.07937]TTLVLK	HexNAc(1)	2019_11_14_GB_TAFs_Glyco5_CTLdirect
DYNC1H1	12_ILDSFAAAPVPT[+203.07937]TTLVLK	HexNAc(1)	2019_11_14_GB_TAFs_Glyco6_Direct24hr
DYNC1H1	12_ISLPITSSSLPT[+203.07937]FNFSSPEITTSSPSPINSSQALTNK	HexNAc(1)	2019_11_14_GB_TAFs_Glyco6_Direct24hr
EDC3	12_ISLPITSSSLPT[+203.07937]FNFSSPEITTSSPSPINSSQALTNK	HexNAc(1)	2019_11_14_GB_TAFs_Glyco6_Direct24hr
EDC3	12_KLANSEPVGT[+203.07937]QT[+568.21157]AK	HexNAc(2)Hex(1)	2019_11_14_GB_TAFs_Glyco4_Direct24hr
EEF1A1	12_KLANSEPVGT[+203.07937]QT[+568.21157]AK	HexNAc(2)Hex(1)	2019_11_14_GB_TAFs_Glyco4_Direct24hr
EEF1A1	12_LQLLLS[+947.32303]SEQFIT[+947.32303]GLIR	HexNAc(1)Hex(1)NeuAc(2)	2019_11_14_GB_TAFs_Glyco5_CTLdirect
EEF1A1	12_LRPDRVAMQDAT[+568.21157]AQM[+15.99492]AM[+15.99492]LQFISSGLSK	HexNAc(2)Hex(1)	2019_11_14_GB_TAFs_Glyco1_CTLdirect
EEF1A1	12_LSFGLEDEPLET[+203.07937]ATKEN	HexNAc(1)	2019_11_14_GB_TAFs_Glyco1_CTLdirect
EGFR	12_LSFGLEDEPLET[+203.07937]ATKEN	HexNAc(1)	2019_11_14_GB_TAFs_Glyco1_CTLdirect
EHBP1	12_LSFGLEDEPLET[+203.07937]ATKEN	HexNAc(1)	2019_11_14_GB_TAFs_Glyco3_CTLdirect
EHBP1	12_LSFGLEDEPLET[+203.07937]ATKEN	HexNAc(1)	2019_11_14_GB_TAFs_Glyco5_CTLdirect
EIF2D	12_LSFGLEDEPLET[+203.07937]ATKEN	HexNAc(1)	2019_11_14_GB_TAFs_Glyco5_CTLdirect
EIF2D	12_LSFGLEDEPLET[+203.07937]ATKEN	HexNAc(1)	2019_11_14_GB_TAFs_Glyco3_CTLdirect
EIF2S3	12_LSFGLEDEPLET[+203.07937]ATKEN	HexNAc(1)	2019_11_14_GB_TAFs_Glyco3_CTLdirect
EIF2S3	12_LSFGLEDEPLET[+203.07937]ATKEN	HexNAc(1)	2019_11_14_GB_TAFs_Glyco5_CTLdirect
EIF4G1	12_LSFGLEDEPLET[+203.07937]ATKEN	HexNAc(1)	2019_11_14_GB_TAFs_Glyco5_CTLdirect
EIF4G3	12_LSFGLEDEPLET[+203.07937]ATKEN	HexNAc(1)	2019_11_14_GB_TAFs_Glyco6_Direct24hr
EIF4G3	12_LVLEQVVT[+568.21157]S[+365.13220]IAS[+365.13220]VADTAEEK	HexNAc(1)Hex(1)	2019_11_14_GB_TAFs_Glyco4_Direct24hr
EIF4G3	12_LVYLYLMN[+0.98402]YAKS[+406.15875]QPDMAIM[+15.99492]AVNTFVK	HexNAc(2)	2019_11_14_GB_TAFs_Glyco2_Direct24hr
EMC1	12_M[+15.99492]TTVALSSTSQT[+203.07937]ATALTVPAISSASTHK	HexNAc(1)	2019_11_14_GB_TAFs_Glyco2_Direct24hr
EPB41L2	12_PQN[+0.98402]LNDAYGPPS[+406.15875]NFLEIDVS[+406.15875]NPQT[+406.15875]VGVGR	HexNAc(2)	2019_11_14_GB_TAFs_Glyco3_CTLdirect
ERGIC1	12_QWLIDTLYAFN[+0.98402]S[+203.07937]GNVER	HexNAc(1)	2019_11_14_GB_TAFs_Glyco4_Direct24hr
ERGIC1	12_SEALPTDLPAPS[+203.07937]APDLTEPK	HexNAc(1)	2019_11_14_GB_TAFs_Glyco4_Direct24hr
ERGIC1	12_SEALPTDLPAPS[+203.07937]APDLTEPK	HexNAc(1)	2019_11_14_GB_TAFs_Glyco6_Direct24hr
ERGIC1	12_SEALPTDLPAPS[+365.13220]APDLTEPK	HexNAc(1)Hex(1)	2019_11_14_GB_TAFs_Glyco3_CTLdirect
ERLIN2	12_SEALPTDLPAPS[+365.13220]APDLTEPK	HexNAc(1)Hex(1)	2019_11_14_GB_TAFs_Glyco3_CTLdirect
ERLIN2	12_SEALPTDLPAPS[+947.32303]APDLTEPK	HexNAc(1)Hex(1)NeuAc(2)	2019_11_14_GB_TAFs_Glyco1_CTLdirect
ERLIN2	12_SEALPTDLPAPS[+947.32303]APDLTEPK	HexNAc(1)Hex(1)NeuAc(2)	2019_11_14_GB_TAFs_Glyco6_Direct24hr
ERLIN2	12_SLEVEVLEDDVS[+406.15875]AVEFR	HexNAc(2)	2019_11_14_GB_TAFs_Glyco3_CTLdirect
ERLIN2	12_STIAAPTSSALS[+203.07937]SQPIFTTAIDDR	HexNAc(1)	2019_11_14_GB_TAFs_Glyco5_CTLdirect
ERLIN2	12_T[+1238.41845]NFFLLLQAVNS[+203.07937]HC[+57.02146]FPAFLAIPPT[+1312.45523]QFK	HexNAc(1)	2019_11_14_GB_TAFs_Glyco2_Direct24hr
ERLIN2	12_T[+1238.41845]NFFLLLQAVNS[+568.21157]HC[+57.02146]FPAFLAIPPT[+947.32303]QFK	HexNAc(2)Hex(1)	2019_11_14_GB_TAFs_Glyco2_Direct24hr
ERLIN2	12_TAAAQVGTSVSS[+203.07937]ATNTSTRPIITVHK	HexNAc(1)	2019_11_14_GB_TAFs_Glyco1_CTLdirect
ERLIN2	12_TETGATETVTPS[+203.07937]EAPVLAAEPEADK	HexNAc(1)	2019_11_14_GB_TAFs_Glyco5_CTLdirect
ERLIN2	12_VSAVDQVSQTIS[+568.21157]LTRPFHNGVK	HexNAc(2)Hex(1)	2019_11_14_GB_TAFs_Glyco3_CTLdirect
ERLIN2	12_YTPTSPSYSPS[+406.15875]S[+1021.35981]PEYTPTSPK	HexNAc(2)Hex(2)NeuAc(1)	2019_11_14_GB_TAFs_Glyco1_CTLdirect
ERP44	13_ALLLAQWAWQEGS[+203.07937]VTR	HexNAc(1)	2019_11_14_GB_TAFs_Glyco1_CTLdirect
ERP44	13_DLYAN[+0.98402]TVLS[+568.21157]GGT[+406.15875]T[+656.22761]MYPGIADR	HexNAc(1)Hex(1)NeuAc(1)	2019_11_14_GB_TAFs_Glyco4_Direct24hr
ERP44	13_DLYAN[+0.98402]TVLS[+568.21157]GGT[+656.22761]T[+406.15875]MYPGIADR	HexNAc(2)	2019_11_14_GB_TAFs_Glyco4_Direct24hr
ERP44	13_DLYANTVLSGGST[+656.22761]M[+15.99492]YPGIADRM[+15.99492]QKEIITLAPSTMK	HexNAc(1)Hex(1)NeuAc(1)	2019_11_14_GB_TAFs_Glyco3_CTLdirect
ERP44	13_DLYANTVLSGGST[+656.22761]MYPGIADRM[+15.99492]QKEIITLAPSTM[+15.99492]K	HexNAc(1)Hex(1)NeuAc(1)	2019_11_14_GB_TAFs_Glyco2_Direct24hr
ERP44	13_DNMFC[+57.02146]EINLPLDT[+365.13220]S[+365.13220]NSSMLK	HexNAc(1)Hex(1)	2019_11_14_GB_TAFs_Glyco2_Direct24hr
ERP44	13_DNMFC[+57.02146]EINLPLDT[+365.13220]S[+365.13220]NSSMLK	HexNAc(1)Hex(1)	2019_11_14_GB_TAFs_Glyco6_Direct24hr
ETF1	13_EYEVMYSSSC[+57.02146]ET[+1021.35981]T[+406.15875]R	HexNAc(2)	2019_11_14_GB_TAFs_Glyco4_Direct24hr
ETF1	13_EYFDQHFGPFFRT[+947.32303]EQLIIR	HexNAc(1)Hex(1)NeuAc(2)	2019_11_14_GB_TAFs_Glyco6_Direct24hr
ETF1	13_GAPNKEETPATES[+406.15875]PDTGLYYHR	HexNAc(2)	2019_11_14_GB_TAFs_Glyco3_CTLdirect
EXOSC8	13_GAPNKEETPATES[+406.15875]PDTGLYYHR	HexNAc(2)	2019_11_14_GB_TAFs_Glyco5_CTLdirect
EXOSC8	13_GAPNKEETPATES[+406.15875]PDTGLYYHR	HexNAc(2)	2019_11_14_GB_TAFs_Glyco6_Direct24hr
FAF1	13_GAPNKEETPATES[+406.15875]PDTGLYYHR	HexNAc(2)	2019_11_14_GB_TAFs_Glyco6_Direct24hr
FAF1	13_GAPNKEETPATES[+406.15875]PDTGLYYHR	HexNAc(2)	2019_11_14_GB_TAFs_Glyco5_CTLdirect
FAH	13_GAPNKEETPATES[+406.15875]PDTGLYYHR	HexNAc(2)	2019_11_14_GB_TAFs_Glyco6_Direct24hr
FAH	13_GQIELT[+406.15875]GKRYPLS[+406.15875]GMGLPTFK	HexNAc(2)	2019_11_14_GB_TAFs_Glyco3_CTLdirect
FAM3C	13_GQIELT[+406.15875]GKRYPLS[+406.15875]GMGLPTFK	HexNAc(2)	2019_11_14_GB_TAFs_Glyco3_CTLdirect
FAM3C	13_IGSSAPTTTAANT[+406.15875]SLM[+15.99492]GIK	HexNAc(2)	2019_11_14_GB_TAFs_Glyco5_CTLdirect
FAM98A	13_KDLYAN[+0.98402]NVLS[+406.15875]GGT[+568.21157]TM[+15.99492]YPGIADR	HexNAc(2)Hex(1)	2019_11_14_GB_TAFs_Glyco6_Direct24hr
FAM98A	13_KDLYANN[+0.98402]VLS[+406.15875]GGT[+568.21157]TM[+15.99492]YPGIADR	HexNAc(2)Hex(1)	2019_11_14_GB_TAFs_Glyco6_Direct24hr
FASN	13_KDLYANT[+203.07937]VLS[+406.15875]GGS[+406.15875]TMYPGIADR	HexNAc(2)	2019_11_14_GB_TAFs_Glyco1_CTLdirect
FASN	13_LATQSNEITIPVT[+203.07937]FESR	HexNAc(1)	2019_11_14_GB_TAFs_Glyco3_CTLdirect
FASN	13_LATQSNEITIPVT[+203.07937]FESR	HexNAc(1)	2019_11_14_GB_TAFs_Glyco4_Direct24hr
FKBP10	13_LATQSNEITIPVT[+203.07937]FESR	HexNAc(1)	2019_11_14_GB_TAFs_Glyco5_CTLdirect
FKBP4	13_LATQSNEITIPVT[+203.07937]FESR	HexNAc(1)	2019_11_14_GB_TAFs_Glyco5_CTLdirect
FKBP4	13_LATQSNEITIPVT[+203.07937]FESR	HexNAc(1)	2019_11_14_GB_TAFs_Glyco6_Direct24hr
FLNA	13_LATQSNEITIPVT[+203.07937]FESR	HexNAc(1)	2019_11_14_GB_TAFs_Glyco3_CTLdirect
FLNB	13_LATQSNEITIPVT[+203.07937]FESR	HexNAc(1)	2019_11_14_GB_TAFs_Glyco4_Direct24hr
FLNB	13_LATQSNEITIPVT[+203.07937]FESR	HexNAc(1)	2019_11_14_GB_TAFs_Glyco5_CTLdirect
FN1	13_LATQSNEITIPVT[+203.07937]FESR	HexNAc(1)	2019_11_14_GB_TAFs_Glyco5_CTLdirect
FN1	13_LATQSNEITIPVT[+203.07937]FESR	HexNAc(1)	2019_11_14_GB_TAFs_Glyco6_Direct24hr
FN1	13_LTT[+406.15875]DFNVIVEALS[+365.13220]K	HexNAc(1)Hex(1)	2019_11_14_GB_TAFs_Glyco2_Direct24hr
G3BP1	13_LTT[+406.15875]DFNVIVEALS[+365.13220]K	HexNAc(1)Hex(1)	2019_11_14_GB_TAFs_Glyco2_Direct24hr
G3BP1	13_QDLPKYLFPEDPS[+406.15875]YSSTMIDDEALK	HexNAc(2)	2019_11_14_GB_TAFs_Glyco2_Direct24hr
GALNT5	13_QDLPKYLFPEDPS[+406.15875]YSSTMIDDEALK	HexNAc(2)	2019_11_14_GB_TAFs_Glyco2_Direct24hr
GALNT5	13_RQDDLISSSVPST[+406.15875]TSTPTVTSAAGLQK	HexNAc(2)	2019_11_14_GB_TAFs_Glyco1_CTLdirect
GALNT5	13_RQDDLISSSVPST[+406.15875]TSTPTVTSAAGLQK	HexNAc(2)	2019_11_14_GB_TAFs_Glyco5_CTLdirect
GALNT5	13_SQNRPQGQSTQPS[+203.07937]NAAGTN[+0.98402]TTSASTPR	HexNAc(1)	2019_11_14_GB_TAFs_Glyco4_Direct24hr
GALNT5	13_TT[+1312.45523]GIVMDS[+406.15875]GDGVT[+203.07937]HIVPIYEGYALPHAILR	HexNAc(1)	2019_11_14_GB_TAFs_Glyco2_Direct24hr
GALNT5	13_VGQEIEVRPGIVS[+203.07937]KDSEGK	HexNAc(1)	2019_11_14_GB_TAFs_Glyco2_Direct24hr
GALNT5	13_VGQEIEVRPGIVS[+203.07937]KDSEGK	HexNAc(1)	2019_11_14_GB_TAFs_Glyco5_CTLdirect
GALNT7	13_VNIDFEPFKPIN[+0.98402]T[+656.22761]SLYLC[+57.02146]DNK	HexNAc(1)Hex(1)NeuAc(1)	2019_11_14_GB_TAFs_Glyco1_CTLdirect
GAPDH	13_VNIDFEPFKPIN[+0.98402]T[+656.22761]SLYLC[+57.02146]DNK	HexNAc(1)Hex(1)NeuAc(1)	2019_11_14_GB_TAFs_Glyco1_CTLdirect
GAPDH	13_VNIDFEPFKPINT[+656.22761]SLYLC[+57.02146]DNK	HexNAc(1)Hex(1)NeuAc(1)	2019_11_14_GB_TAFs_Glyco6_Direct24hr
GAPDH	14_DNMFC[+57.02146]EINLPLDT[+365.13220]S[+365.13220]NSSMLK	HexNAc(1)Hex(1)	2019_11_14_GB_TAFs_Glyco2_Direct24hr
GAPDH	14_DNMFC[+57.02146]EINLPLDT[+365.13220]S[+365.13220]NSSMLK	HexNAc(1)Hex(1)	2019_11_14_GB_TAFs_Glyco6_Direct24hr
GCN1	14_DNMFC[+57.02146]EINLPLDT[+365.13220]S[+365.13220]NSSMLK	HexNAc(1)Hex(1)	2019_11_14_GB_TAFs_Glyco6_Direct24hr
GCN1	14_EQVLEPMLN[+0.98402]GT[+406.15875]EKT[+656.22761]PPLITDYR	HexNAc(1)Hex(1)NeuAc(1)	2019_11_14_GB_TAFs_Glyco4_Direct24hr
GLUD1	14_EQVLEPMLN[+0.98402]GT[+406.15875]EKT[+656.22761]PPLITDYR	HexNAc(1)Hex(1)NeuAc(1)	2019_11_14_GB_TAFs_Glyco4_Direct24hr
GLUD1	14_FNAHGDANT[+568.21157]IVC[+57.02146]N[+0.98402]S[+365.13220]K	HexNAc(1)Hex(1)	2019_11_14_GB_TAFs_Glyco2_Direct24hr
GMPPB	14_FNAHGDANT[+568.21157]IVC[+57.02146]N[+0.98402]S[+365.13220]K	HexNAc(1)Hex(1)	2019_11_14_GB_TAFs_Glyco2_Direct24hr
GMPPB	14_GQLEQIT[+203.07937]GKGAS[+406.15875]GT[+406.15875]FQLK	HexNAc(2)	2019_11_14_GB_TAFs_Glyco5_CTLdirect
GMPPB	14_GVFRYC[+57.02146]NT[+568.21157]WPVAIS[+1238.41845]MLASK	HexNAc(1)Hex(1)NeuAc(3)	2019_11_14_GB_TAFs_Glyco2_Direct24hr
GMPS	14_HFLC[+57.02146]YYYYGGMIYT[+568.21157]GLK	HexNAc(2)Hex(1)	2019_11_14_GB_TAFs_Glyco6_Direct24hr
GMPS	14_IASHYYITN[+0.98402]DT[+568.21157]VQT[+365.13220]YNQLLK	HexNAc(1)Hex(1)	2019_11_14_GB_TAFs_Glyco1_CTLdirect
GNL3	14_ILDSFAAAPVPTTT[+203.07937]LVLK	HexNAc(1)	2019_11_14_GB_TAFs_Glyco1_CTLdirect
GOLGB1	14_ILDSFAAAPVPTTT[+203.07937]LVLK	HexNAc(1)	2019_11_14_GB_TAFs_Glyco3_CTLdirect
GOLGB1	14_KPC[+57.02146]SVAPNDIPLVS[+568.21157]S[+1238.41845]T[+1238.41845]NLINEINGVSEK	HexNAc(2)Hex(1)	2019_11_14_GB_TAFs_Glyco5_CTLdirect
GOLIM4	14_LC[+57.02146]YVALDFEN[+0.98402]EM[+15.99492]AT[+406.15875]AAS[+1312.45523]SSSLEK	HexNAc(2)	2019_11_14_GB_TAFs_Glyco1_CTLdirect
GOLIM4	14_LGNTISSLFGGGTT[+203.07937]PDAK	HexNAc(1)	2019_11_14_GB_TAFs_Glyco1_CTLdirect
GOLIM4	14_LPLQDVYKIGGIGT[+568.21157]VPVGRVETGVLKPGM[+15.99492]VVTFAPVN[+0.98402]VTTEVK	HexNAc(2)Hex(1)	2019_11_14_GB_TAFs_Glyco5_CTLdirect
GOLIM4	14_LSFGLEDEPLETAT[+203.07937]KEN	HexNAc(1)	2019_11_14_GB_TAFs_Glyco6_Direct24hr
GOLIM4	14_LVTS[+203.07937]ADGKPTTIIT[+203.07937]TTQASGAGTKPTILGISSVSPST[+203.07937]TKPGTTTIIK	HexNAc(1)	2019_11_14_GB_TAFs_Glyco2_Direct24hr
GOLIM4	14_LVTSADGKPTTIIT[+203.07937]TTQASGAGTKPTILGISSVSPS[+406.15875]TTKPGTTTIIK	HexNAc(1)	2019_11_14_GB_TAFs_Glyco1_CTLdirect
GOLIM4	14_MAYVNFVNHC[+57.02146]YVDT[+203.07937]EVEMK	HexNAc(1)	2019_11_14_GB_TAFs_Glyco2_Direct24hr
GOLIM4	14_MPKKPKN[+0.98402]ENPVDYT[+947.32303]VQIPPSTTYAITPMK	HexNAc(1)Hex(1)NeuAc(2)	2019_11_14_GB_TAFs_Glyco1_CTLdirect
GOLIM4	14_MPKKPKN[+0.98402]ENPVDYT[+947.32303]VQIPPSTTYAITPMK	HexNAc(1)Hex(1)NeuAc(2)	2019_11_14_GB_TAFs_Glyco4_Direct24hr
GOLIM4	14_MPKKPKNEN[+0.98402]PVDYT[+947.32303]VQIPPSTTYAITPMK	HexNAc(1)Hex(1)NeuAc(2)	2019_11_14_GB_TAFs_Glyco1_CTLdirect
GOLIM4	14_MPKKPKNEN[+0.98402]PVDYT[+947.32303]VQIPPSTTYAITPMK	HexNAc(1)Hex(1)NeuAc(2)	2019_11_14_GB_TAFs_Glyco4_Direct24hr
GOLIM4	14_MPKKPKNENPVDYT[+947.32303]VQIPPSTTYAITPMK	HexNAc(1)Hex(1)NeuAc(2)	2019_11_14_GB_TAFs_Glyco6_Direct24hr
GOLIM4	14_PAVVAPAPVVEAVS[+1238.41845]T[+406.15875]PSAAFPSDATAEQGPILTK	HexNAc(1)Hex(1)NeuAc(3)	2019_11_14_GB_TAFs_Glyco3_CTLdirect
GOLIM4	14_PAVVAPAPVVEAVS[+1238.41845]T[+406.15875]PSAAFPSDATAEQGPILTK	HexNAc(1)Hex(1)NeuAc(3)	2019_11_14_GB_TAFs_Glyco6_Direct24hr
GOLIM4	14_PLFKN[+0.98402]LDFGIDMDS[+568.21157]R	HexNAc(2)Hex(1)	2019_11_14_GB_TAFs_Glyco2_Direct24hr
GOLIM4	14_RQDDLISSSVPSTT[+406.15875]STPTVTSAAGLQK	HexNAc(2)	2019_11_14_GB_TAFs_Glyco1_CTLdirect
GOT2	14_RQDDLISSSVPSTT[+406.15875]STPTVTSAAGLQK	HexNAc(2)	2019_11_14_GB_TAFs_Glyco1_CTLdirect
GOT2	14_RQDDLISSSVPSTT[+406.15875]STPTVTSAAGLQK	HexNAc(2)	2019_11_14_GB_TAFs_Glyco5_CTLdirect
GRPEL1	14_SGTVTVAQQAQVVT[+203.07937]TVVGGVTK	HexNAc(1)	2019_11_14_GB_TAFs_Glyco1_CTLdirect
GRPEL1	14_SGTVTVAQQAQVVT[+203.07937]TVVGGVTK	HexNAc(1)	2019_11_14_GB_TAFs_Glyco2_Direct24hr
GRPEL1	14_SGTVTVAQQAQVVT[+406.15875]TVVGGVTK	HexNAc(2)	2019_11_14_GB_TAFs_Glyco5_CTLdirect
GRSF1	14_SGTVTVAQQAQVVT[+406.15875]TVVGGVTK	HexNAc(2)	2019_11_14_GB_TAFs_Glyco2_Direct24hr
GSDME	14_SGTVTVAQQAQVVT[+406.15875]TVVGGVTK	HexNAc(2)	2019_11_14_GB_TAFs_Glyco6_Direct24hr
GSDME	14_SSLSNNEC[+57.02146]GSLDKT[+365.13220]S[+1021.35981]PEMSNSNNDER	HexNAc(1)Hex(1)	2019_11_14_GB_TAFs_Glyco2_Direct24hr
GSDME	14_TAAAQVGTSVSSAT[+406.15875]NTSTRPIITVHK	HexNAc(2)	2019_11_14_GB_TAFs_Glyco3_CTLdirect
GTPBP4	14_TAAAQVGTSVSSAT[+406.15875]NTSTRPIITVHK	HexNAc(2)	2019_11_14_GB_TAFs_Glyco3_CTLdirect
GTPBP4	14_TIPM[+15.99492]SAIITQAGAT[+203.07937]GVTSSPGIK	HexNAc(1)	2019_11_14_GB_TAFs_Glyco1_CTLdirect
GTPBP4	14_TM[+15.99492]AVTPGTTTLPAT[+203.07937]VK	HexNAc(1)	2019_11_14_GB_TAFs_Glyco1_CTLdirect
GTPBP4	14_TM[+15.99492]AVTPGTTTLPAT[+203.07937]VK	HexNAc(1)	2019_11_14_GB_TAFs_Glyco6_Direct24hr
HADHA	14_TM[+15.99492]AVTPGTTTLPAT[+203.07937]VK	HexNAc(1)	2019_11_14_GB_TAFs_Glyco2_Direct24hr
HADHA	14_TM[+15.99492]AVTPGTTTLPAT[+406.15875]VK	HexNAc(2)	2019_11_14_GB_TAFs_Glyco2_Direct24hr
HADHA	14_VENLNIHQIFNPET[+1312.45523]K	HexNAc(2)Hex(2)NeuAc(2)	2019_11_14_GB_TAFs_Glyco6_Direct24hr
HCFC1	14_VLGLGLLINLVEYS[+947.32303]ARN[+0.98402]R	HexNAc(1)Hex(1)NeuAc(2)	2019_11_14_GB_TAFs_Glyco1_CTLdirect
HCFC1	14_VNLPTTVSNFNNPS[+203.07937]PS[+406.15875]VVTATTSVHESNK	HexNAc(1)	2019_11_14_GB_TAFs_Glyco1_CTLdirect
HCFC1	14_VNLPTTVSNFNNPS[+406.15875]PS[+203.07937]VVTATTSVHESNK	HexNAc(2)	2019_11_14_GB_TAFs_Glyco1_CTLdirect
HCFC1	14_VYFMKQT[+1021.35981]IGNS[+1021.35981]C[+57.02146]GT[+365.13220]IGLIHAVANNQDK	HexNAc(1)Hex(1)	2019_11_14_GB_TAFs_Glyco2_Direct24hr
HCFC1	14_WDS[+203.07937]AIPVTTIAQPT[+203.07937]ILTTTATLPAVVTVTTSASGSK	HexNAc(1)	2019_11_14_GB_TAFs_Glyco6_Direct24hr
HCFC1	15_AIFLADGKVFT[+568.21157]T[+568.21157]GFS[+568.21157]R	HexNAc(2)Hex(1)	2019_11_14_GB_TAFs_Glyco5_CTLdirect
HCFC1	15_ASASGSGAQVGGPIS[+203.07937]SGSSASSVTVTR	HexNAc(1)	2019_11_14_GB_TAFs_Glyco6_Direct24hr
HCFC1	15_C[+57.02146]PEALFQPSFLGMES[+203.07937]C[+57.02146]GIHETTFNSIM[+15.99492]K	HexNAc(1)	2019_11_14_GB_TAFs_Glyco3_CTLdirect
HCFC1	15_C[+57.02146]PEALFQPSFLGMES[+203.07937]C[+57.02146]GIHETTFNSIM[+15.99492]K	HexNAc(1)	2019_11_14_GB_TAFs_Glyco6_Direct24hr
HCFC1	15_DSIIYLTADSPNVMT[+406.15875]T[+406.15875]FRHDK	HexNAc(2)	2019_11_14_GB_TAFs_Glyco4_Direct24hr
HCFC1	15_ELVQDLLKTLPQMFT[+365.13220]KT[+365.13220]LETQSALGPALQAAFK	HexNAc(1)Hex(1)	2019_11_14_GB_TAFs_Glyco2_Direct24hr
HCFC1	15_IIPAIWFRYDLS[+406.15875]PIT[+203.07937]VK	HexNAc(1)	2019_11_14_GB_TAFs_Glyco3_CTLdirect
HCFC1	15_KPC[+57.02146]SVAPNDIPLVS[+568.21157]S[+1238.41845]T[+1238.41845]NLINEINGVSEK	HexNAc(1)Hex(1)NeuAc(3)	2019_11_14_GB_TAFs_Glyco5_CTLdirect
HCFC1	15_LQVNQVVIHEDFIQS[+203.07937]C[+57.02146]FDR	HexNAc(1)	2019_11_14_GB_TAFs_Glyco3_CTLdirect
HCFC1	15_LVTPVTVSAVKPAVT[+203.07937]TLVVK	HexNAc(1)	2019_11_14_GB_TAFs_Glyco3_CTLdirect
HCFC1	15_LVTS[+203.07937]ADGKPTTIITT[+203.07937]TQASGAGTKPTILGISSVSPSTT[+203.07937]KPGTTTIIK	HexNAc(1)	2019_11_14_GB_TAFs_Glyco2_Direct24hr
HCFC1	15_PAVVAPAPVVEAVS[+1238.41845]T[+406.15875]PSAAFPSDATAEQGPILTK	HexNAc(2)	2019_11_14_GB_TAFs_Glyco3_CTLdirect
HCFC1	15_PAVVAPAPVVEAVS[+1238.41845]T[+406.15875]PSAAFPSDATAEQGPILTK	HexNAc(2)	2019_11_14_GB_TAFs_Glyco6_Direct24hr
HCFC1	15_PDPAEQQNVTQVAHS[+203.07937]PQGYN[+0.98402]T[+656.22761]AR	HexNAc(1)	2019_11_14_GB_TAFs_Glyco3_CTLdirect
HCFC1	15_PGVLLNQFPC[+57.02146]ENLLT[+203.07937]VK	HexNAc(1)	2019_11_14_GB_TAFs_Glyco4_Direct24hr
HCFC1	15_PPLPVYTQFYFFNVT[+947.32303]NPEEILR	HexNAc(1)Hex(1)NeuAc(2)	2019_11_14_GB_TAFs_Glyco6_Direct24hr
HCFC1	15_QVNVVAKAM[+15.99492]GT[+406.15875]LGVS[+203.07937]LSSC[+57.02146]SVPGSK	HexNAc(1)	2019_11_14_GB_TAFs_Glyco2_Direct24hr
HCFC1	15_S[+203.07937]GTVTVAQQAQVVTT[+203.07937]VVGGVTK	HexNAc(1)	2019_11_14_GB_TAFs_Glyco2_Direct24hr
HCFC1	15_SGTVTVAQQAQVVTT[+203.07937]VVGGVTK	HexNAc(1)	2019_11_14_GB_TAFs_Glyco2_Direct24hr
HCFC1	15_SGTVTVAQQAQVVTT[+406.15875]VVGGVTK	HexNAc(2)	2019_11_14_GB_TAFs_Glyco1_CTLdirect
HCFC1	15_SGTVTVAQQAQVVTT[+406.15875]VVGGVTK	HexNAc(2)	2019_11_14_GB_TAFs_Glyco2_Direct24hr
HCFC1	15_SGTVTVAQQAQVVTT[+406.15875]VVGGVTK	HexNAc(2)	2019_11_14_GB_TAFs_Glyco3_CTLdirect
HCFC1	15_SGTVTVAQQAQVVTT[+406.15875]VVGGVTK	HexNAc(2)	2019_11_14_GB_TAFs_Glyco4_Direct24hr
HCFC1	15_SGTVTVAQQAQVVTT[+406.15875]VVGGVTK	HexNAc(2)	2019_11_14_GB_TAFs_Glyco6_Direct24hr
HCFC1	15_SGTVTVAQQAQVVTT[+406.15875]VVGGVTK	HexNAc(2)	2019_11_14_GB_TAFs_Glyco5_CTLdirect
HCFC1	15_SPAPAAAAPAVQPLT[+203.07937]QVGITLLPQAAPAPPTTTTIQVLPT[+203.07937]VPGSSISVPTAAR	HexNAc(1)	2019_11_14_GB_TAFs_Glyco4_Direct24hr
HCFC1	15_SPAVATSTAAPPPPS[+203.07937]SPLPSK	HexNAc(1)	2019_11_14_GB_TAFs_Glyco6_Direct24hr
HCFC1	15_SSLSNNEC[+57.02146]GSLDKT[+365.13220]S[+1021.35981]PEMSNSNNDER	HexNAc(2)Hex(2)NeuAc(1)	2019_11_14_GB_TAFs_Glyco2_Direct24hr
HCFC1	15_SSPVVSTVLSGSSGS[+203.07937]SSTR	HexNAc(1)	2019_11_14_GB_TAFs_Glyco1_CTLdirect
HCFC1	15_SSPVVSTVLSGSSGS[+203.07937]SSTR	HexNAc(1)	2019_11_14_GB_TAFs_Glyco6_Direct24hr
HCFC1	15_VLSSAIPVAGAPLVT[+203.07937]ATTTAVSSVLLAPSVFQQTVTR	HexNAc(1)	2019_11_14_GB_TAFs_Glyco1_CTLdirect
HCFC1	15_VLSSAIPVAGAPLVT[+203.07937]ATTTAVSSVLLAPSVFQQTVTR	HexNAc(1)	2019_11_14_GB_TAFs_Glyco5_CTLdirect
HCFC1	15_VLSSAIPVAGAPLVT[+406.15875]ATTTAVSSVLLAPSVFQQTVTR	HexNAc(2)	2019_11_14_GB_TAFs_Glyco1_CTLdirect
HCFC1	15_VLSSAIPVAGAPLVT[+406.15875]ATTTAVSSVLLAPSVFQQTVTR	HexNAc(2)	2019_11_14_GB_TAFs_Glyco2_Direct24hr
HCFC1	15_VLSSAIPVAGAPLVT[+406.15875]ATTTAVSSVLLAPSVFQQTVTR	HexNAc(2)	2019_11_14_GB_TAFs_Glyco3_CTLdirect
HCFC1	15_VLSSAIPVAGAPLVT[+406.15875]ATTTAVSSVLLAPSVFQQTVTR	HexNAc(2)	2019_11_14_GB_TAFs_Glyco4_Direct24hr
HCFC1	15_YVASYLLAALGGNSS[+568.21157]PS[+365.13220]AK	HexNAc(2)Hex(1)	2019_11_14_GB_TAFs_Glyco1_CTLdirect
HCFC1	16_DSIIYLTADSPNVMT[+406.15875]T[+406.15875]FRHDK	HexNAc(2)	2019_11_14_GB_TAFs_Glyco4_Direct24hr
HCFC1	16_GAPN[+0.98402]KEETPATESPDT[+203.07937]GLYYHR	HexNAc(1)	2019_11_14_GB_TAFs_Glyco4_Direct24hr
HCFC1	16_GAPNKEETPATESPDT[+203.07937]GLYYHR	HexNAc(1)	2019_11_14_GB_TAFs_Glyco6_Direct24hr
HCFC1	16_ISLPITSSSLPTFNFS[+203.07937]SPEITTSSPSPINSSQALTNK	HexNAc(1)	2019_11_14_GB_TAFs_Glyco4_Direct24hr
HCFC1	16_KPC[+57.02146]SVAPNDIPLVS[+568.21157]S[+1238.41845]T[+1238.41845]NLINEINGVSEK	HexNAc(1)Hex(1)NeuAc(3)	2019_11_14_GB_TAFs_Glyco5_CTLdirect
HCFC1	16_LVT[+203.07937]SADGKPTTIITTT[+203.07937]QASGAGTKPTILGISSVSPS[+203.07937]TTKPGTTTIIK	HexNAc(1)	2019_11_14_GB_TAFs_Glyco1_CTLdirect
HCFC1	16_LVTS[+203.07937]ADGKPTTIITTT[+203.07937]QASGAGTKPTILGISSVSPSTT[+203.07937]KPGTTTIIK	HexNAc(1)	2019_11_14_GB_TAFs_Glyco5_CTLdirect
HCFC1	16_LVTSADGKPTTIITTT[+203.07937]QASGAGTKPTILGISSVSPS[+406.15875]TTKPGTTTIIK	HexNAc(1)	2019_11_14_GB_TAFs_Glyco6_Direct24hr
HCFC1	16_LVTSADGKPTTIITTT[+406.15875]QASGAGTKPTILGISSVSPSTTKPGTTTIIK	HexNAc(2)	2019_11_14_GB_TAFs_Glyco6_Direct24hr
HCFC1	16_NIMVIPDLYLN[+0.98402]AGGVT[+406.15875]VSYFEWLK	HexNAc(2)	2019_11_14_GB_TAFs_Glyco3_CTLdirect
HCFC1	16_PAPPEKPSPPT[+406.15875]VAPLT[+406.15875]PDGK	HexNAc(2)	2019_11_14_GB_TAFs_Glyco3_CTLdirect
HCFC1	16_SPAVATSTAAPPPPSS[+203.07937]PLPSK	HexNAc(1)	2019_11_14_GB_TAFs_Glyco2_Direct24hr
HCFC1	16_SPAVATSTAAPPPPSS[+203.07937]PLPSK	HexNAc(1)	2019_11_14_GB_TAFs_Glyco5_CTLdirect
HCFC1	16_SPAVATSTAAPPPPSS[+203.07937]PLPSK	HexNAc(1)	2019_11_14_GB_TAFs_Glyco4_Direct24hr
HCFC1	16_SSPVVSTVLSGSSGSS[+203.07937]STR	HexNAc(1)	2019_11_14_GB_TAFs_Glyco6_Direct24hr
HCFC1	16_TAAAQVGTSVSSATNT[+406.15875]STRPIITVHK	HexNAc(2)	2019_11_14_GB_TAFs_Glyco3_CTLdirect
HCFC1	16_VELFFKDDANN[+0.98402]DPQWS[+406.15875]EEQLIAAK	HexNAc(2)	2019_11_14_GB_TAFs_Glyco2_Direct24hr
HCFC1	16_VM[+15.99492]SVVQTKPVQTSAVT[+203.07937]GQASTGPVTQIIQTK	HexNAc(1)	2019_11_14_GB_TAFs_Glyco1_CTLdirect
HCFC1	16_VM[+15.99492]SVVQTKPVQTSAVT[+203.07937]GQASTGPVTQIIQTK	HexNAc(1)	2019_11_14_GB_TAFs_Glyco2_Direct24hr
HCFC1	16_VM[+15.99492]SVVQTKPVQTSAVT[+203.07937]GQASTGPVTQIIQTK	HexNAc(1)	2019_11_14_GB_TAFs_Glyco5_CTLdirect
HCFC1	16_VM[+15.99492]SVVQTKPVQTSAVT[+203.07937]GQASTGPVTQIIQTK	HexNAc(1)	2019_11_14_GB_TAFs_Glyco6_Direct24hr
HCFC1	16_VNLPTTVSNFNNPS[+203.07937]PS[+406.15875]VVTATTSVHESNK	HexNAc(2)	2019_11_14_GB_TAFs_Glyco1_CTLdirect
HCFC1	16_VNLPTTVSNFNNPS[+406.15875]PS[+203.07937]VVTATTSVHESNK	HexNAc(1)	2019_11_14_GB_TAFs_Glyco1_CTLdirect
HCFC1	17_APLAGQVSTM[+15.99492]VTTSTTT[+406.15875]TVAK	HexNAc(2)	2019_11_14_GB_TAFs_Glyco1_CTLdirect
HCFC1	17_AVSTPAPATTQQSAPAS[+203.07937]TTAVTSSTTTTVAQAPTPVPALAPTSTPASIT[+203.07937]PASATASSEPAPASAAK	HexNAc(1)	2019_11_14_GB_TAFs_Glyco1_CTLdirect
HCFC1	17_AVSTPAPATTQQSAPAS[+406.15875]TTAVTSSTTTTVAQAPTPVPALAPTSTPASITPASATASSEPAPASAAK	HexNAc(2)	2019_11_14_GB_TAFs_Glyco5_CTLdirect
HCFC1	17_ELVQDLLKTLPQMFT[+365.13220]KT[+365.13220]LETQSALGPALQAAFK	HexNAc(1)Hex(1)	2019_11_14_GB_TAFs_Glyco2_Direct24hr
HCFC1	17_ISLPITSSSLPTFNFSS[+203.07937]PEITTSSPSPINSSQALTNK	HexNAc(1)	2019_11_14_GB_TAFs_Glyco4_Direct24hr
HCFC1	17_ISLPITSSSLPTFNFSS[+203.07937]PEITTSSPSPINSSQALTNK	HexNAc(1)	2019_11_14_GB_TAFs_Glyco1_CTLdirect
HCFC1	17_KGTTTNATSTTTTTAST[+203.07937]AVADAQK	HexNAc(1)	2019_11_14_GB_TAFs_Glyco5_CTLdirect
HCFC1	17_LC[+57.02146]YVALDFEN[+0.98402]EM[+15.99492]AT[+406.15875]AAS[+1312.45523]SSSLEK	HexNAc(2)Hex(2)NeuAc(2)	2019_11_14_GB_TAFs_Glyco1_CTLdirect
HCFC1	17_LHDINAQMVEDQGFLDS[+947.32303]LR	HexNAc(1)Hex(1)NeuAc(2)	2019_11_14_GB_TAFs_Glyco3_CTLdirect
HCFC1	17_PALLHS[+656.22761]T[+406.15875]FFPALQGAQT[+406.15875]K	HexNAc(2)	2019_11_14_GB_TAFs_Glyco4_Direct24hr
HCFC1	17_PLFLHHVIMHGIPN[+0.98402]FES[+1312.45523]K	HexNAc(2)Hex(2)NeuAc(2)	2019_11_14_GB_TAFs_Glyco5_CTLdirect
HCFC1	17_SEALPTDLPAPSAPDLT[+203.07937]EPK	HexNAc(1)	2019_11_14_GB_TAFs_Glyco1_CTLdirect
HCFC1	17_SEALPTDLPAPSAPDLT[+203.07937]EPK	HexNAc(1)	2019_11_14_GB_TAFs_Glyco3_CTLdirect
HCFC1	17_SEALPTDLPAPSAPDLT[+203.07937]EPK	HexNAc(1)	2019_11_14_GB_TAFs_Glyco5_CTLdirect
HCFC1	17_SEALPTDLPAPSAPDLT[+203.07937]EPK	HexNAc(1)	2019_11_14_GB_TAFs_Glyco4_Direct24hr
HCFC1	17_SEALPTDLPAPSAPDLT[+203.07937]EPK	HexNAc(1)	2019_11_14_GB_TAFs_Glyco6_Direct24hr
HCFC1	17_SSPVVSTVLSGSSGSSS[+203.07937]TR	HexNAc(1)	2019_11_14_GB_TAFs_Glyco6_Direct24hr
HCFC1	17_TAAAQVGTSVSSATNTS[+203.07937]TRPIITVHK	HexNAc(1)	2019_11_14_GB_TAFs_Glyco1_CTLdirect
HCFC1	17_VLSSAIPVAGAPLVTAT[+406.15875]TTAVSSVLLAPSVFQQTVTR	HexNAc(2)	2019_11_14_GB_TAFs_Glyco1_CTLdirect
HCFC1	17_VLSSAIPVAGAPLVTAT[+406.15875]TTAVSSVLLAPSVFQQTVTR	HexNAc(2)	2019_11_14_GB_TAFs_Glyco4_Direct24hr
HCFC1	17_VLSSAIPVAGAPLVTAT[+406.15875]TTAVSSVLLAPSVFQQTVTR	HexNAc(2)	2019_11_14_GB_TAFs_Glyco5_CTLdirect
HCFC1	17_VLSSAIPVAGAPLVTAT[+406.15875]TTAVSSVLLAPSVFQQTVTR	HexNAc(2)	2019_11_14_GB_TAFs_Glyco6_Direct24hr
HCFC1	17_VVKQASEGPLKGILGYT[+568.21157]EHQVVS[+1021.35981]SDFNS[+1312.45523]DTHSSTFDAGAGIALNDHFVK	HexNAc(2)Hex(1)	2019_11_14_GB_TAFs_Glyco6_Direct24hr
HCFC1	17_VVKQASEGPLKGILGYT[+568.21157]EHQVVS[+1021.35981]SDFNSDTHSS[+1312.45523]TFDAGAGIALNDHFVK	HexNAc(2)Hex(1)	2019_11_14_GB_TAFs_Glyco6_Direct24hr
HCFC1	17_WDSAIPVTTIAQPTILT[+406.15875]TTATLPAVVTVTTSASGSK	HexNAc(2)	2019_11_14_GB_TAFs_Glyco1_CTLdirect
HCFC1	17_WDSAIPVTTIAQPTILT[+406.15875]TTATLPAVVTVTTSASGSK	HexNAc(2)	2019_11_14_GB_TAFs_Glyco4_Direct24hr
HCFC1	17_WDSAIPVTTIAQPTILT[+406.15875]TTATLPAVVTVTTSASGSK	HexNAc(2)	2019_11_14_GB_TAFs_Glyco3_CTLdirect
HCFC1	17_YVASYLLAALGGNSS[+568.21157]PS[+365.13220]AK	HexNAc(1)Hex(1)	2019_11_14_GB_TAFs_Glyco1_CTLdirect
HCFC1	18_AEPM[+15.99492]PSASSAPPASSLYS[+203.07937]SPVN[+0.98402]SSAPLAEDIDPELAR	HexNAc(1)	2019_11_14_GB_TAFs_Glyco1_CTLdirect
HCFC1	18_ASASGSGAQVGGPISSGS[+203.07937]SASSVTVTR	HexNAc(1)	2019_11_14_GB_TAFs_Glyco3_CTLdirect
HCFC1	18_ASASGSGAQVGGPISSGS[+203.07937]SASSVTVTR	HexNAc(1)	2019_11_14_GB_TAFs_Glyco6_Direct24hr
HCFC1	18_AVSTPAPATTQQSAPAST[+203.07937]TAVTSST[+203.07937]TTTVAQAPTPVPALAPTSTPASITPASATASSEPAPASAAK	HexNAc(1)	2019_11_14_GB_TAFs_Glyco1_CTLdirect
HCFC1	18_AVSTPAPATTQQSAPAST[+406.15875]TAVTSSTTTTVAQAPTPVPALAPTSTPASITPASATASSEPAPASAAK	HexNAc(2)	2019_11_14_GB_TAFs_Glyco5_CTLdirect
HCFC1	18_AVSTPAPATTQQSAPAST[+406.15875]TAVTSSTTTTVAQAPTPVPALAPTSTPASITPASATASSEPAPASAAK	HexNAc(2)	2019_11_14_GB_TAFs_Glyco4_Direct24hr
HCFC1	18_AVSTPAPATTQQSAPAST[+406.15875]TAVTSSTTTTVAQAPTPVPALAPTSTPASITPASATASSEPAPASAAK	HexNAc(2)	2019_11_14_GB_TAFs_Glyco1_CTLdirect
HCFC1	18_TIPM[+15.99492]SAIITQAGATGVTS[+203.07937]SPGIK	HexNAc(1)	2019_11_14_GB_TAFs_Glyco3_CTLdirect
HCFC1	18_TIPM[+15.99492]SAIITQAGATGVTS[+203.07937]SPGIK	HexNAc(1)	2019_11_14_GB_TAFs_Glyco4_Direct24hr
HCFC1	18_TPGPAVAIQSVRC[+57.02146]YSHGS[+203.07937]QET[+406.15875]DEEFDARWVT[+406.15875]YFNKPDIDAWELR	HexNAc(1)	2019_11_14_GB_TAFs_Glyco4_Direct24hr
HCFC1	18_TPGPAVAIQSVRC[+57.02146]YSHGS[+406.15875]QET[+406.15875]DEEFDARWVT[+203.07937]YFNKPDIDAWELR	HexNAc(2)	2019_11_14_GB_TAFs_Glyco4_Direct24hr
HCFC1	18_VAGHPNIVINNAAGNFIS[+406.15875]PT[+406.15875]ER	HexNAc(2)	2019_11_14_GB_TAFs_Glyco6_Direct24hr
HCFC1	18_VLSSAIPVAGAPLVTATT[+203.07937]TAVSSVLLAPSVFQQTVTR	HexNAc(1)	2019_11_14_GB_TAFs_Glyco1_CTLdirect
HCFC1	18_VLSSAIPVAGAPLVTATT[+203.07937]TAVSSVLLAPSVFQQTVTR	HexNAc(1)	2019_11_14_GB_TAFs_Glyco3_CTLdirect
HCFC1	18_VLSSAIPVAGAPLVTATT[+203.07937]TAVSSVLLAPSVFQQTVTR	HexNAc(1)	2019_11_14_GB_TAFs_Glyco5_CTLdirect
HCFC1	18_VLSSAIPVAGAPLVTATT[+203.07937]TAVSSVLLAPSVFQQTVTR	HexNAc(1)	2019_11_14_GB_TAFs_Glyco6_Direct24hr
HCFC1	18_VLSSAIPVAGAPLVTATT[+203.07937]TAVSSVLLAPSVFQQTVTR	HexNAc(1)	2019_11_14_GB_TAFs_Glyco4_Direct24hr
HCFC1	18_VLSSAIPVAGAPLVTATT[+406.15875]TAVSSVLLAPSVFQQTVTR	HexNAc(2)	2019_11_14_GB_TAFs_Glyco1_CTLdirect
HCFC1	18_VLSSAIPVAGAPLVTATT[+406.15875]TAVSSVLLAPSVFQQTVTR	HexNAc(2)	2019_11_14_GB_TAFs_Glyco2_Direct24hr
HDLBP	18_VLSSAIPVAGAPLVTATT[+406.15875]TAVSSVLLAPSVFQQTVTR	HexNAc(2)	2019_11_14_GB_TAFs_Glyco6_Direct24hr
HDLBP	18_WDSAIPVTTIAQPTILTT[+406.15875]TATLPAVVTVTTSASGSK	HexNAc(2)	2019_11_14_GB_TAFs_Glyco1_CTLdirect
HEATR1	18_WDSAIPVTTIAQPTILTT[+406.15875]TATLPAVVTVTTSASGSK	HexNAc(2)	2019_11_14_GB_TAFs_Glyco3_CTLdirect
HEATR1	19_AEPM[+15.99492]PSASSAPPASSLYSS[+203.07937]PVN[+0.98402]SSAPLAEDIDPELAR	HexNAc(1)	2019_11_14_GB_TAFs_Glyco6_Direct24hr
HEATR1	19_AEPM[+15.99492]PSASSAPPASSLYSS[+203.07937]PVN[+0.98402]SSAPLAEDIDPELAR	HexNAc(1)	2019_11_14_GB_TAFs_Glyco1_CTLdirect
HEATR1	19_AEPM[+15.99492]PSASSAPPASSLYSS[+203.07937]PVNSSAPLAEDIDPELAR	HexNAc(1)	2019_11_14_GB_TAFs_Glyco5_CTLdirect
HGS	19_ASASGSGAQVGGPISSGSS[+203.07937]ASSVTVTR	HexNAc(1)	2019_11_14_GB_TAFs_Glyco5_CTLdirect
HGS	19_ASASGSGAQVGGPISSGSS[+203.07937]ASSVTVTR	HexNAc(1)	2019_11_14_GB_TAFs_Glyco6_Direct24hr
HGS	19_ASASGSGAQVGGPISSGSS[+203.07937]ASSVTVTR	HexNAc(1)	2019_11_14_GB_TAFs_Glyco3_CTLdirect
HGS	19_AVSTPAPATTQQSAPASTT[+406.15875]AVTSSTTTTVAQAPTPVPALAPTSTPASITPASATASSEPAPASAAK	HexNAc(2)	2019_11_14_GB_TAFs_Glyco4_Direct24hr
HGS	19_AVSTPAPATTQQSAPASTT[+406.15875]AVTSSTTTTVAQAPTPVPALAPTSTPASITPASATASSEPAPASAAK	HexNAc(2)	2019_11_14_GB_TAFs_Glyco5_CTLdirect
HGS	19_AVSTPAPATTQQSAPASTT[+406.15875]AVTSSTTTTVAQAPTPVPALAPTSTPASITPASATASSEPAPASAAK	HexNAc(2)	2019_11_14_GB_TAFs_Glyco1_CTLdirect
HGS	19_DFQTLENWM[+15.99492]LQTLNEEPVT[+203.07937]PEPEVEPPSAPELK	HexNAc(1)	2019_11_14_GB_TAFs_Glyco2_Direct24hr
HGS	19_DFQTLENWM[+15.99492]LQTLNEEPVT[+203.07937]PEPEVEPPSAPELK	HexNAc(1)	2019_11_14_GB_TAFs_Glyco3_CTLdirect
HGS	19_DFQTLENWM[+15.99492]LQTLNEEPVT[+203.07937]PEPEVEPPSAPELK	HexNAc(1)	2019_11_14_GB_TAFs_Glyco4_Direct24hr
HGSNAT	19_DFQTLENWM[+15.99492]LQTLNEEPVT[+203.07937]PEPEVEPPSAPELK	HexNAc(1)	2019_11_14_GB_TAFs_Glyco4_Direct24hr
HIST2H2AC	19_DFQTLENWM[+15.99492]LQTLNEEPVT[+203.07937]PEPEVEPPSAPELK	HexNAc(1)	2019_11_14_GB_TAFs_Glyco4_Direct24hr
HIST2H2AC	19_DFQTLENWM[+15.99492]LQTLNEEPVT[+203.07937]PEPEVEPPSAPELK	HexNAc(1)	2019_11_14_GB_TAFs_Glyco5_CTLdirect
HNRNPH1	19_DFQTLENWM[+15.99492]LQTLNEEPVT[+203.07937]PEPEVEPPSAPELK	HexNAc(1)	2019_11_14_GB_TAFs_Glyco5_CTLdirect
HNRNPUL2	19_DFQTLENWM[+15.99492]LQTLNEEPVT[+203.07937]PEPEVEPPSAPELK	HexNAc(1)	2019_11_14_GB_TAFs_Glyco5_CTLdirect
HNRNPUL2	19_DFQTLENWM[+15.99492]LQTLNEEPVT[+203.07937]PEPEVEPPSAPELK	HexNAc(1)	2019_11_14_GB_TAFs_Glyco6_Direct24hr
HP1BP3	19_DFQTLENWM[+15.99492]LQTLNEEPVT[+203.07937]PEPEVEPPSAPELK	HexNAc(1)	2019_11_14_GB_TAFs_Glyco6_Direct24hr
HSD17B4	19_DFQTLENWM[+15.99492]LQTLNEEPVT[+203.07937]PEPEVEPPSAPELK	HexNAc(1)	2019_11_14_GB_TAFs_Glyco6_Direct24hr
HSD17B4	19_DFQTLENWM[+15.99492]LQTLNEEPVT[+203.07937]PEPEVEPPSAPELK	HexNAc(1)	2019_11_14_GB_TAFs_Glyco2_Direct24hr
HSP90AA1	19_DFQTLENWM[+15.99492]LQTLNEEPVT[+203.07937]PEPEVEPPSAPELK	HexNAc(1)	2019_11_14_GB_TAFs_Glyco2_Direct24hr
HSP90AA1	19_DFQTLENWM[+15.99492]LQTLNEEPVT[+203.07937]PEPEVEPPSAPELK	HexNAc(1)	2019_11_14_GB_TAFs_Glyco3_CTLdirect
HSP90B1	19_DFQTLENWM[+15.99492]LQTLNEEPVT[+203.07937]PEPEVEPPSAPELK	HexNAc(1)	2019_11_14_GB_TAFs_Glyco3_CTLdirect
HSP90B1	19_DFQTLENWM[+15.99492]LQTLNEEPVT[+203.07937]PEPEVEPPSAPELK	HexNAc(1)	2019_11_14_GB_TAFs_Glyco4_Direct24hr
HSP90B1	19_DFQTLENWM[+15.99492]LQTLNEEPVT[+203.07937]PEPEVEPPSAPELK	HexNAc(1)	2019_11_14_GB_TAFs_Glyco5_CTLdirect
HSP90B1	19_DFQTLENWM[+15.99492]LQTLNEEPVT[+203.07937]PEPEVEPPSAPELK	HexNAc(1)	2019_11_14_GB_TAFs_Glyco6_Direct24hr
HSP90B1	19_DFQTLENWM[+15.99492]LQTLNEEPVT[+203.07937]PEPEVEPPSAPELK	HexNAc(1)	2019_11_14_GB_TAFs_Glyco1_CTLdirect
HSPA9	19_DFQTLENWM[+15.99492]LQTLNEEPVT[+203.07937]PEPEVEPPSAPELK	HexNAc(1)	2019_11_14_GB_TAFs_Glyco1_CTLdirect
HSPB1	19_DFQTLENWM[+15.99492]LQTLNEEPVT[+203.07937]PEPEVEPPSAPELK	HexNAc(1)	2019_11_14_GB_TAFs_Glyco1_CTLdirect
HSPB1	19_DFQTLENWM[+15.99492]LQTLNEEPVT[+365.13220]PEPEVEPPSAPELK	HexNAc(1)Hex(1)	2019_11_14_GB_TAFs_Glyco5_CTLdirect
HSPB1	19_DFQTLENWM[+15.99492]LQTLNEEPVT[+365.13220]PEPEVEPPSAPELK	HexNAc(1)Hex(1)	2019_11_14_GB_TAFs_Glyco1_CTLdirect
HSPB1	19_DFQTLENWM[+15.99492]LQTLNEEPVT[+947.32303]PEPEVEPPSAPELK	HexNAc(1)Hex(1)NeuAc(2)	2019_11_14_GB_TAFs_Glyco2_Direct24hr
HSPB1	19_DFQTLENWM[+15.99492]LQTLNEEPVT[+947.32303]PEPEVEPPSAPELK	HexNAc(1)Hex(1)NeuAc(2)	2019_11_14_GB_TAFs_Glyco5_CTLdirect
HSPB1	19_DFQTLENWM[+15.99492]LQTLNEEPVT[+947.32303]PEPEVEPPSAPELK	HexNAc(1)Hex(1)NeuAc(2)	2019_11_14_GB_TAFs_Glyco6_Direct24hr
HSPD1	19_DFQTLENWM[+15.99492]LQTLNEEPVT[+947.32303]PEPEVEPPSAPELK	HexNAc(1)Hex(1)NeuAc(2)	2019_11_14_GB_TAFs_Glyco5_CTLdirect
HSPE1	19_DFQTLENWM[+15.99492]LQTLNEEPVT[+947.32303]PEPEVEPPSAPELK	HexNAc(1)Hex(1)NeuAc(2)	2019_11_14_GB_TAFs_Glyco5_CTLdirect
HSPE1	19_DFQTLENWM[+15.99492]LQTLNEEPVT[+947.32303]PEPEVEPPSAPELK	HexNAc(1)Hex(1)NeuAc(2)	2019_11_14_GB_TAFs_Glyco6_Direct24hr
HSPH1	19_DFQTLENWM[+15.99492]LQTLNEEPVT[+947.32303]PEPEVEPPSAPELK	HexNAc(1)Hex(1)NeuAc(2)	2019_11_14_GB_TAFs_Glyco6_Direct24hr
HSPH1	19_DFQTLENWM[+15.99492]LQTLNEEPVT[+947.32303]PEPEVEPPSAPELK	HexNAc(1)Hex(1)NeuAc(2)	2019_11_14_GB_TAFs_Glyco1_CTLdirect
HSPH1	19_DPIQPPELQLVT[+568.21157]PMAEGDT[+365.13220]GLPR	HexNAc(1)Hex(1)	2019_11_14_GB_TAFs_Glyco2_Direct24hr
HSPH1	19_LVTSADGKPTTIITTTQAS[+406.15875]GAGTKPTILGISSVSPSTTKPGTTTIIK	HexNAc(2)	2019_11_14_GB_TAFs_Glyco6_Direct24hr
HSPH1	19_NAALFALGQFS[+406.15875]ENLQPHIS[+1021.35981]S[+406.15875]YSR	HexNAc(2)Hex(2)NeuAc(1)	2019_11_14_GB_TAFs_Glyco2_Direct24hr
HSPH1	19_SHLVHGSSPGVM[+15.99492]GTSVATS[+203.07937]ASK	HexNAc(1)	2019_11_14_GB_TAFs_Glyco6_Direct24hr
HYOU1	19_SHLVHGSSPGVM[+15.99492]GTSVATS[+203.07937]ASK	HexNAc(1)	2019_11_14_GB_TAFs_Glyco6_Direct24hr
HYOU1	19_SLEM[+15.99492]LELGLS[+1312.45523]EAQVMMALS[+1312.45523]NHLNAVESEK	HexNAc(2)Hex(2)NeuAc(2)	2019_11_14_GB_TAFs_Glyco6_Direct24hr
HYOU1	19_VLSSAIPVAGAPLVTATTT[+203.07937]AVSSVLLAPSVFQQTVTR	HexNAc(1)	2019_11_14_GB_TAFs_Glyco4_Direct24hr
HYOU1	19_VLSSAIPVAGAPLVTATTT[+406.15875]AVSSVLLAPSVFQQTVTR	HexNAc(2)	2019_11_14_GB_TAFs_Glyco1_CTLdirect
HYOU1	19_VLSSAIPVAGAPLVTATTT[+406.15875]AVSSVLLAPSVFQQTVTR	HexNAc(2)	2019_11_14_GB_TAFs_Glyco3_CTLdirect
IDE	19_VLSSAIPVAGAPLVTATTT[+406.15875]AVSSVLLAPSVFQQTVTR	HexNAc(2)	2019_11_14_GB_TAFs_Glyco4_Direct24hr
IDE	19_VLSSAIPVAGAPLVTATTT[+406.15875]AVSSVLLAPSVFQQTVTR	HexNAc(2)	2019_11_14_GB_TAFs_Glyco5_CTLdirect
IGF2R	19_VLSSAIPVAGAPLVTATTT[+406.15875]AVSSVLLAPSVFQQTVTR	HexNAc(2)	2019_11_14_GB_TAFs_Glyco5_CTLdirect
IGF2R	19_VLSSAIPVAGAPLVTATTT[+406.15875]AVSSVLLAPSVFQQTVTR	HexNAc(2)	2019_11_14_GB_TAFs_Glyco6_Direct24hr
IGF2R	19_VNLPTTVSNFNNPSPSVVT[+406.15875]ATT[+203.07937]SVHESNK	HexNAc(2)	2019_11_14_GB_TAFs_Glyco6_Direct24hr
IGF2R	19_WDS[+203.07937]AIPVTTIAQPTILTTT[+203.07937]ATLPAVVTVTTSASGSK	HexNAc(1)	2019_11_14_GB_TAFs_Glyco4_Direct24hr
IGF2R	2_AS[+365.13220]IQEC[+57.02146]ILPDSPLYHNK	HexNAc(1)Hex(1)	2019_11_14_GB_TAFs_Glyco2_Direct24hr
IGF2R	2_DT[+568.21157]ET[+568.21157]VLK	HexNAc(2)Hex(1)	2019_11_14_GB_TAFs_Glyco6_Direct24hr
ILF3	2_ES[+203.07937]YDVIANQPVVIDN[+0.98402]GSGVIK	HexNAc(1)	2019_11_14_GB_TAFs_Glyco6_Direct24hr
ILF3	2_ET[+1312.45523]LPN[+0.98402]VR	HexNAc(2)Hex(2)NeuAc(2)	2019_11_14_GB_TAFs_Glyco4_Direct24hr
ILF3	2_FS[+656.22761]LVGIGGQDLN[+0.98402]EGNR	HexNAc(1)Hex(1)NeuAc(1)	2019_11_14_GB_TAFs_Glyco4_Direct24hr
ILF3	2_GS[+947.32303]GVVIIMDVYSYSEK	HexNAc(1)Hex(1)NeuAc(2)	2019_11_14_GB_TAFs_Glyco1_CTLdirect
ILF3	2_GS[+947.32303]LLFTAGPLEEERFGFPAFSGISR	HexNAc(1)Hex(1)NeuAc(2)	2019_11_14_GB_TAFs_Glyco1_CTLdirect
ILF3	2_GT[+947.32303]VIIIANHGDR	HexNAc(1)Hex(1)NeuAc(2)	2019_11_14_GB_TAFs_Glyco4_Direct24hr
ILF3	2_IS[+203.07937]LPITSSSLPTFNFSSPEITTSSPSPINSSQALTNK	HexNAc(1)	2019_11_14_GB_TAFs_Glyco3_CTLdirect
ILF3	2_IS[+365.13220]EQFS[+365.13220]AM[+15.99492]FRR	HexNAc(1)Hex(1)	2019_11_14_GB_TAFs_Glyco4_Direct24hr
ILF3	2_KT[+1021.35981]LTLIEK	HexNAc(2)Hex(2)NeuAc(1)	2019_11_14_GB_TAFs_Glyco2_Direct24hr
ILF3	2_KT[+365.13220]ET[+1312.45523]MNVVMETNK	HexNAc(1)Hex(1)	2019_11_14_GB_TAFs_Glyco3_CTLdirect
ILF3	2_LS[+1312.45523]FS[+568.21157]EINT[+1312.45523]R	HexNAc(2)Hex(2)NeuAc(2)	2019_11_14_GB_TAFs_Glyco1_CTLdirect
ILF3	2_LS[+203.07937]EVT[+656.22761]FRPLFFK	HexNAc(1)	2019_11_14_GB_TAFs_Glyco3_CTLdirect
IPO4	2_LS[+365.13220]QILT[+406.15875]DFPK	HexNAc(1)Hex(1)	2019_11_14_GB_TAFs_Glyco4_Direct24hr
IPO4	2_LS[+568.21157]FS[+1312.45523]EINT[+1312.45523]R	HexNAc(2)Hex(1)	2019_11_14_GB_TAFs_Glyco1_CTLdirect
IPO5	2_LS[+568.21157]FS[+1312.45523]EINT[+1312.45523]R	HexNAc(2)Hex(1)	2019_11_14_GB_TAFs_Glyco1_CTLdirect
IPO5	2_LT[+1021.35981]DT[+406.15875]LVSK	HexNAc(2)Hex(2)NeuAc(1)	2019_11_14_GB_TAFs_Glyco4_Direct24hr
IPO5	2_LT[+1312.45523]KLQS[+1312.45523]VQALTEIQEFISFIS[+1021.35981]K	HexNAc(2)Hex(2)NeuAc(2)	2019_11_14_GB_TAFs_Glyco2_Direct24hr
IPO5	2_NS[+1021.35981]SYVHGGLDSN[+0.98402]GK	HexNAc(2)Hex(2)NeuAc(1)	2019_11_14_GB_TAFs_Glyco4_Direct24hr
ITGA6	2_PT[+203.07937]S[+406.15875]AYYTR	HexNAc(1)	2019_11_14_GB_TAFs_Glyco4_Direct24hr
ITGA6	2_PT[+365.13220]LS[+568.21157]ELEK	HexNAc(1)Hex(1)	2019_11_14_GB_TAFs_Glyco4_Direct24hr
ITGAV	2_PT[+365.13220]T[+1312.45523]HEK	HexNAc(1)Hex(1)	2019_11_14_GB_TAFs_Glyco6_Direct24hr
ITGAV	2_PT[+656.22761]FMDEEVQSILTK	HexNAc(1)Hex(1)NeuAc(1)	2019_11_14_GB_TAFs_Glyco1_CTLdirect
ITGAV	2_QS[+203.07937]VT[+1238.41845]IKT[+1238.41845]MLEDLGMDDEGDDDPVPLPNVNAAILK	HexNAc(1)	2019_11_14_GB_TAFs_Glyco6_Direct24hr
ITPR3	2_RT[+203.07937]ELM[+15.99492]VSMGYTR	HexNAc(1)	2019_11_14_GB_TAFs_Glyco4_Direct24hr
ITPR3	2_S[+406.15875]S[+406.15875]LGSLQTPEAVTTR	HexNAc(2)	2019_11_14_GB_TAFs_Glyco5_CTLdirect
KIAA2013	2_S[+406.15875]S[+406.15875]LGSLQTPEAVTTR	HexNAc(2)	2019_11_14_GB_TAFs_Glyco5_CTLdirect
KIAA2013	2_T[+1238.41845]S[+1238.41845]MS[+1021.35981]K	HexNAc(1)Hex(1)NeuAc(3)	2019_11_14_GB_TAFs_Glyco4_Direct24hr
KIAA2013	2_T[+947.32303]S[+1312.45523]MS[+1238.41845]K	HexNAc(2)Hex(2)NeuAc(2)	2019_11_14_GB_TAFs_Glyco4_Direct24hr
KIAA2013	2_TT[+1312.45523]GIVMDS[+406.15875]GDGVT[+203.07937]HIVPIYEGYALPHAILR	HexNAc(2)Hex(2)NeuAc(2)	2019_11_14_GB_TAFs_Glyco2_Direct24hr
KIF23	2_TT[+1312.45523]GIVMDS[+406.15875]GDGVT[+203.07937]HIVPIYEGYALPHAILR	HexNAc(2)Hex(2)NeuAc(2)	2019_11_14_GB_TAFs_Glyco2_Direct24hr
KLC1	2_VT[+1312.45523]HGC[+57.02146]IVS[+1312.45523]T[+1021.35981]IK	HexNAc(2)Hex(2)NeuAc(2)	2019_11_14_GB_TAFs_Glyco3_CTLdirect
KLC1	2_VT[+203.07937]WDGHS[+947.32303]GS[+406.15875]MAR	HexNAc(1)	2019_11_14_GB_TAFs_Glyco2_Direct24hr
KLC1	2_VT[+568.21157]VIPFYMGMR	HexNAc(2)Hex(1)	2019_11_14_GB_TAFs_Glyco2_Direct24hr
KPNB1	2_VT[+568.21157]VLT[+1021.35981]LQDK	HexNAc(2)Hex(1)	2019_11_14_GB_TAFs_Glyco1_CTLdirect
KTN1	2_VT[+568.21157]VLT[+1021.35981]LQDK	HexNAc(2)Hex(1)	2019_11_14_GB_TAFs_Glyco1_CTLdirect
KTN1	2_VT[+947.32303]C[+57.02146]LES[+203.07937]GLR	HexNAc(1)Hex(1)NeuAc(2)	2019_11_14_GB_TAFs_Glyco2_Direct24hr
LARP4	2_VT[+947.32303]VLTLQDK	HexNAc(1)Hex(1)NeuAc(2)	2019_11_14_GB_TAFs_Glyco1_CTLdirect
LARP4	2_YS[+406.15875]LDLASLILYAYQLSTALAYLES[+1021.35981]K	HexNAc(2)	2019_11_14_GB_TAFs_Glyco4_Direct24hr
LARP4	20_NAALFALGQFS[+406.15875]ENLQPHIS[+1021.35981]S[+406.15875]YSR	HexNAc(2)	2019_11_14_GB_TAFs_Glyco2_Direct24hr
LCP1	20_PQN[+0.98402]LNDAYGPPS[+406.15875]NFLEIDVS[+406.15875]NPQT[+406.15875]VGVGR	HexNAc(2)	2019_11_14_GB_TAFs_Glyco3_CTLdirect
LGALS1	20_PQN[+0.98402]LNDAYGPPS[+406.15875]NFLEIDVS[+406.15875]NPQT[+406.15875]VGVGR	HexNAc(2)	2019_11_14_GB_TAFs_Glyco3_CTLdirect
LGALS1	20_SPAPAAAAPAVQPLTQVGIT[+406.15875]LLPQAAPAPPTTTTIQVLPTVPGSSISVPTAAR	HexNAc(2)	2019_11_14_GB_TAFs_Glyco1_CTLdirect
LGALS1	20_SPAPAAAAPAVQPLTQVGIT[+406.15875]LLPQAAPAPPTTTTIQVLPTVPGSSISVPTAAR	HexNAc(2)	2019_11_14_GB_TAFs_Glyco2_Direct24hr
LIG4	20_SPAPAAAAPAVQPLTQVGIT[+406.15875]LLPQAAPAPPTTTTIQVLPTVPGSSISVPTAAR	HexNAc(2)	2019_11_14_GB_TAFs_Glyco4_Direct24hr
LIG4	20_SPAPAAAAPAVQPLTQVGIT[+406.15875]LLPQAAPAPPTTTTIQVLPTVPGSSISVPTAAR	HexNAc(2)	2019_11_14_GB_TAFs_Glyco6_Direct24hr
LMAN2	20_SPAPAAAAPAVQPLTQVGIT[+406.15875]LLPQAAPAPPTTTTIQVLPTVPGSSISVPTAAR	HexNAc(2)	2019_11_14_GB_TAFs_Glyco6_Direct24hr
LMAN2	20_SPAPAAAAPAVQPLTQVGIT[+406.15875]LLPQAAPAPPTTTTIQVLPTVPGSSISVPTAAR	HexNAc(2)	2019_11_14_GB_TAFs_Glyco2_Direct24hr
LMAN2	20_SPAPAAAAPAVQPLTQVGIT[+406.15875]LLPQAAPAPPTTTTIQVLPTVPGSSISVPTAAR	HexNAc(2)	2019_11_14_GB_TAFs_Glyco5_CTLdirect
LMAN2	20_VAGHPNIVINNAAGNFIS[+406.15875]PT[+406.15875]ER	HexNAc(2)	2019_11_14_GB_TAFs_Glyco6_Direct24hr
LMAN2	21_APQTPLM[+15.99492]PSFSAPSGTGLLPT[+203.07937]PITQQASLTSLAQGTGTTSAITFPEEQEDPR	HexNAc(1)	2019_11_14_GB_TAFs_Glyco4_Direct24hr
LMNA	21_ISLPITSSSLPTFNFSSPEIT[+203.07937]TSSPSPINSSQALTNK	HexNAc(1)	2019_11_14_GB_TAFs_Glyco1_CTLdirect
LMNA	21_LT[+1312.45523]KLQS[+1312.45523]VQALTEIQEFISFIS[+1021.35981]K	HexNAc(2)Hex(2)NeuAc(1)	2019_11_14_GB_TAFs_Glyco2_Direct24hr
LMNA	21_PDPAEQQNVTQVAHS[+203.07937]PQGYN[+0.98402]T[+656.22761]AR	HexNAc(1)Hex(1)NeuAc(1)	2019_11_14_GB_TAFs_Glyco3_CTLdirect
LMNA	21_TPGPAVAIQSVRC[+57.02146]YSHGS[+203.07937]QET[+406.15875]DEEFDARWVT[+406.15875]YFNKPDIDAWELR	HexNAc(2)	2019_11_14_GB_TAFs_Glyco4_Direct24hr
LMNA	21_TPGPAVAIQSVRC[+57.02146]YSHGS[+406.15875]QET[+406.15875]DEEFDARWVT[+203.07937]YFNKPDIDAWELR	HexNAc(2)	2019_11_14_GB_TAFs_Glyco4_Direct24hr
LMNA	21_VNLPT[+203.07937]TVSNFNN[+0.98402]PSPSVVTAT[+203.07937]TSVHESNK	HexNAc(1)	2019_11_14_GB_TAFs_Glyco4_Direct24hr
LMO7	21_VNLPTTVSN[+0.98402]FNNPSPSVVTAT[+406.15875]TSVHESNK	HexNAc(2)	2019_11_14_GB_TAFs_Glyco4_Direct24hr
LPP	21_VNLPTTVSN[+0.98402]FNNPSPSVVTAT[+406.15875]TSVHESNK	HexNAc(2)	2019_11_14_GB_TAFs_Glyco4_Direct24hr
LPP	21_VTIAQGGVLPNIQAVLLPKKT[+656.22761]ESHKAK	HexNAc(1)Hex(1)NeuAc(1)	2019_11_14_GB_TAFs_Glyco4_Direct24hr
LRP1	21_VTIAQGGVLPNIQAVLLPKKT[+656.22761]ESHKAK	HexNAc(1)Hex(1)NeuAc(1)	2019_11_14_GB_TAFs_Glyco4_Direct24hr
LRP1	22_IANEVIGEM[+15.99492]NLKPEEVFLAQGT[+568.21157]LR	HexNAc(2)Hex(1)	2019_11_14_GB_TAFs_Glyco5_CTLdirect
LRP1	22_ISLPITSSSLPTFNFSSPEITT[+203.07937]SSPSPINSSQALTNK	HexNAc(1)	2019_11_14_GB_TAFs_Glyco4_Direct24hr
LRP1	22_KPHTSLTTAASPVSTSAGGIM[+15.99492]T[+203.07937]APAIDIFSTPSSSNSTSK	HexNAc(1)	2019_11_14_GB_TAFs_Glyco2_Direct24hr
LRP1	22_KPHTSLTTAASPVSTSAGGIM[+15.99492]T[+203.07937]APAIDIFSTPSSSNSTSK	HexNAc(1)	2019_11_14_GB_TAFs_Glyco4_Direct24hr
LRPAP1	22_KPHTSLTTAASPVSTSAGGIM[+15.99492]T[+203.07937]APAIDIFSTPSSSNSTSK	HexNAc(1)	2019_11_14_GB_TAFs_Glyco1_CTLdirect
LRRC47	22_M[+15.99492]TTVALSSTSQTATALTVPAIS[+203.07937]SASTHK	HexNAc(1)	2019_11_14_GB_TAFs_Glyco2_Direct24hr
LRRFIP2	22_VLSSAIPVAGAPLVTATTTAVS[+203.07937]SVLLAPSVFQQTVTR	HexNAc(1)	2019_11_14_GB_TAFs_Glyco1_CTLdirect
LRRFIP2	22_VLSSAIPVAGAPLVTATTTAVS[+406.15875]SVLLAPSVFQQTVTR	HexNAc(2)	2019_11_14_GB_TAFs_Glyco4_Direct24hr
LSS	22_VLSSAIPVAGAPLVTATTTAVS[+406.15875]SVLLAPSVFQQTVTR	HexNAc(2)	2019_11_14_GB_TAFs_Glyco2_Direct24hr
LSS	22_VLSSAIPVAGAPLVTATTTAVS[+406.15875]SVLLAPSVFQQTVTR	HexNAc(2)	2019_11_14_GB_TAFs_Glyco4_Direct24hr
LSS	22_VNLPT[+203.07937]TVSNFNNPSPSVVTATT[+406.15875]SVHESNK	HexNAc(2)	2019_11_14_GB_TAFs_Glyco6_Direct24hr
LUZP1	22_VNLPTTVSNFNNPSPSVVT[+406.15875]ATT[+203.07937]SVHESNK	HexNAc(1)	2019_11_14_GB_TAFs_Glyco6_Direct24hr
LUZP1	23_[+42.01056]MPMANLLLLIVPILIAMAFLMLT[+1312.45523]ER	HexNAc(2)Hex(2)NeuAc(2)	2019_11_14_GB_TAFs_Glyco1_CTLdirect
MACF1	23_VLSSAIPVAGAPLVTATTTAVSS[+203.07937]VLLAPSVFQQTVTR	HexNAc(1)	2019_11_14_GB_TAFs_Glyco1_CTLdirect
MACF1	23_VLSSAIPVAGAPLVTATTTAVSS[+406.15875]VLLAPSVFQQTVTR	HexNAc(2)	2019_11_14_GB_TAFs_Glyco4_Direct24hr
MACF1	23_VNLPT[+203.07937]TVSNFNNPSPSVVTATTS[+406.15875]VHESN[+0.98402]K	HexNAc(2)	2019_11_14_GB_TAFs_Glyco1_CTLdirect
MACF1	23_VNLPT[+203.07937]TVSNFNNPSPSVVTATTS[+406.15875]VHESNK	HexNAc(2)	2019_11_14_GB_TAFs_Glyco1_CTLdirect
MACF1	23_VVKQASEGPLKGILGYT[+568.21157]EHQVVS[+1021.35981]SDFNS[+1312.45523]DTHSSTFDAGAGIALNDHFVK	HexNAc(2)Hex(2)NeuAc(1)	2019_11_14_GB_TAFs_Glyco6_Direct24hr
MACF1	23_VVKQASEGPLKGILGYT[+568.21157]EHQVVS[+1021.35981]SDFNSDTHSS[+1312.45523]TFDAGAGIALNDHFVK	HexNAc(2)Hex(2)NeuAc(1)	2019_11_14_GB_TAFs_Glyco6_Direct24hr
MACF1	24_EDIEWTHIDYFNNAIIC[+57.02146]DLIENNT[+406.15875]N[+0.98402]GILAMLDEEC[+57.02146]LR	HexNAc(2)	2019_11_14_GB_TAFs_Glyco4_Direct24hr
MACF1	24_PQN[+0.98402]LNDAYGPPS[+406.15875]NFLEIDVS[+406.15875]NPQT[+406.15875]VGVGR	HexNAc(2)	2019_11_14_GB_TAFs_Glyco3_CTLdirect
MAP1B	24_PQN[+0.98402]LNDAYGPPS[+406.15875]NFLEIDVS[+406.15875]NPQT[+406.15875]VGVGR	HexNAc(2)	2019_11_14_GB_TAFs_Glyco3_CTLdirect
MAP1B	24_T[+1238.41845]NFFLLLQAVNS[+203.07937]HC[+57.02146]FPAFLAIPPT[+1312.45523]QFK	HexNAc(2)Hex(2)NeuAc(2)	2019_11_14_GB_TAFs_Glyco2_Direct24hr
MAPK1	24_T[+1238.41845]NFFLLLQAVNS[+203.07937]HC[+57.02146]FPAFLAIPPT[+1312.45523]QFK	HexNAc(2)Hex(2)NeuAc(2)	2019_11_14_GB_TAFs_Glyco2_Direct24hr
MAPK1	24_T[+1238.41845]NFFLLLQAVNS[+568.21157]HC[+57.02146]FPAFLAIPPT[+947.32303]QFK	HexNAc(1)Hex(1)NeuAc(2)	2019_11_14_GB_TAFs_Glyco2_Direct24hr
MARK2	24_T[+1238.41845]NFFLLLQAVNS[+568.21157]HC[+57.02146]FPAFLAIPPT[+947.32303]QFK	HexNAc(1)Hex(1)NeuAc(2)	2019_11_14_GB_TAFs_Glyco2_Direct24hr
MBD2	24_YS[+406.15875]LDLASLILYAYQLSTALAYLES[+1021.35981]K	HexNAc(2)Hex(2)NeuAc(1)	2019_11_14_GB_TAFs_Glyco4_Direct24hr
MBD2	25_AVSTPAPATTQQSAPAST[+203.07937]TAVTSST[+203.07937]TTTVAQAPTPVPALAPTSTPASITPASATASSEPAPASAAK	HexNAc(1)	2019_11_14_GB_TAFs_Glyco1_CTLdirect
MBD3	25_AVSTPAPATTQQSAPAST[+203.07937]TAVTSST[+203.07937]TTTVAQAPTPVPALAPTSTPASITPASATASSEPAPASAAK	HexNAc(1)	2019_11_14_GB_TAFs_Glyco1_CTLdirect
MBD3	27_TETGATETVTPSEAPVLAAEPEADKGT[+203.07937]VLALTEN[+0.98402]NFDDTIAEGITFIK	HexNAc(1)	2019_11_14_GB_TAFs_Glyco6_Direct24hr
MGAT2	27_TETGATETVTPSEAPVLAAEPEADKGT[+203.07937]VLALTENNFDDTIAEGITFIK	HexNAc(1)	2019_11_14_GB_TAFs_Glyco4_Direct24hr
MGAT2	27_TETGATETVTPSEAPVLAAEPEADKGT[+203.07937]VLALTENNFDDTIAEGITFIK	HexNAc(1)	2019_11_14_GB_TAFs_Glyco6_Direct24hr
MKI67	27_TETGATETVTPSEAPVLAAEPEADKGT[+203.07937]VLALTENNFDDTIAEGITFIK	HexNAc(1)	2019_11_14_GB_TAFs_Glyco3_CTLdirect
MKI67	27_TETGATETVTPSEAPVLAAEPEADKGT[+203.07937]VLALTENNFDDTIAEGITFIK	HexNAc(1)	2019_11_14_GB_TAFs_Glyco4_Direct24hr
MPI	27_TETGATETVTPSEAPVLAAEPEADKGT[+365.13220]VLALTEN[+0.98402]NFDDTIAEGITFIK	HexNAc(1)Hex(1)	2019_11_14_GB_TAFs_Glyco2_Direct24hr
MPI	27_TETGATETVTPSEAPVLAAEPEADKGT[+365.13220]VLALTENNFDDTIAEGITFIK	HexNAc(1)Hex(1)	2019_11_14_GB_TAFs_Glyco1_CTLdirect
MRC2	27_TETGATETVTPSEAPVLAAEPEADKGT[+365.13220]VLALTENNFDDTIAEGITFIK	HexNAc(1)Hex(1)	2019_11_14_GB_TAFs_Glyco1_CTLdirect
MRC2	27_TETGATETVTPSEAPVLAAEPEADKGT[+365.13220]VLALTENNFDDTIAEGITFIK	HexNAc(1)Hex(1)	2019_11_14_GB_TAFs_Glyco4_Direct24hr
MRC2	27_TETGATETVTPSEAPVLAAEPEADKGT[+365.13220]VLALTENNFDDTIAEGITFIK	HexNAc(1)Hex(1)	2019_11_14_GB_TAFs_Glyco3_CTLdirect
MRC2	27_TETGATETVTPSEAPVLAAEPEADKGT[+406.15875]VLALTENNFDDTIAEGITFIK	HexNAc(2)	2019_11_14_GB_TAFs_Glyco1_CTLdirect
MRC2	27_TETGATETVTPSEAPVLAAEPEADKGT[+656.22761]VLALTENNFDDTIAEGITFIK	HexNAc(1)Hex(1)NeuAc(1)	2019_11_14_GB_TAFs_Glyco4_Direct24hr
MRC2	27_TETGATETVTPSEAPVLAAEPEADKGT[+947.32303]VLALTENNFDDTIAEGITFIK	HexNAc(1)Hex(1)NeuAc(2)	2019_11_14_GB_TAFs_Glyco3_CTLdirect
MRC2	28_VVKQASEGPLKGILGYT[+568.21157]EHQVVS[+1021.35981]SDFNS[+1312.45523]DTHSSTFDAGAGIALNDHFVK	HexNAc(2)Hex(2)NeuAc(2)	2019_11_14_GB_TAFs_Glyco6_Direct24hr
MRC2	29_NNGTITWEN[+0.98402]LAAVLPFGGTFDLVQLKGST[+947.32303]LK	HexNAc(1)Hex(1)NeuAc(2)	2019_11_14_GB_TAFs_Glyco6_Direct24hr
MRC2	3_[+42.01056]M[+15.99492]PS[+568.21157]T[+1238.41845]DLLMLK	HexNAc(2)Hex(1)	2019_11_14_GB_TAFs_Glyco3_CTLdirect
MRC2	3_AGS[+1238.41845]LLWM[+15.99492]VATSPGR	HexNAc(1)Hex(1)NeuAc(3)	2019_11_14_GB_TAFs_Glyco2_Direct24hr
MRC2	3_AIS[+203.07937]EPNFSVAYANMC[+57.02146]R	HexNAc(1)	2019_11_14_GB_TAFs_Glyco2_Direct24hr
MRC2	3_APT[+1312.45523]IEQMK	HexNAc(2)Hex(2)NeuAc(2)	2019_11_14_GB_TAFs_Glyco2_Direct24hr
MRC2	3_AVS[+406.15875]TPAPATTQQSAPASTTAVTSSTTTTVAQAPTPVPALAPTSTPASITPASATASSEPAPASAAK	HexNAc(2)	2019_11_14_GB_TAFs_Glyco4_Direct24hr
MRC2	3_EES[+1312.45523]R	HexNAc(2)Hex(2)NeuAc(2)	2019_11_14_GB_TAFs_Glyco2_Direct24hr
MRC2	3_FQT[+203.07937]FLINMT[+947.32303]ALLVESLNHR	HexNAc(1)	2019_11_14_GB_TAFs_Glyco6_Direct24hr
MRC2	3_GET[+656.22761]LLS[+406.15875]PLVMC[+57.02146]GPHGLK	HexNAc(1)Hex(1)NeuAc(1)	2019_11_14_GB_TAFs_Glyco5_CTLdirect
MRC2	3_GLS[+1312.45523]GT[+1312.45523]AVLDLR	HexNAc(2)Hex(2)NeuAc(2)	2019_11_14_GB_TAFs_Glyco3_CTLdirect
MRPL1	3_GQT[+406.15875]S[+406.15875]TYGFLK	HexNAc(2)	2019_11_14_GB_TAFs_Glyco3_CTLdirect
MRPL1	3_GSS[+203.07937]AS[+656.22761]LVLK	HexNAc(1)	2019_11_14_GB_TAFs_Glyco5_CTLdirect
MRPS22	3_GSS[+203.07937]AS[+656.22761]LVLK	HexNAc(1)	2019_11_14_GB_TAFs_Glyco6_Direct24hr
MRPS22	3_GSS[+656.22761]AS[+203.07937]LVLK	HexNAc(1)Hex(1)NeuAc(1)	2019_11_14_GB_TAFs_Glyco5_CTLdirect
MSH6	3_GSS[+656.22761]AS[+203.07937]LVLK	HexNAc(1)Hex(1)NeuAc(1)	2019_11_14_GB_TAFs_Glyco6_Direct24hr
MSRB3	3_GVT[+1238.41845]YR	HexNAc(1)Hex(1)NeuAc(3)	2019_11_14_GB_TAFs_Glyco4_Direct24hr
MT-ND1	3_GYT[+203.07937]S[+656.22761]K	HexNAc(1)	2019_11_14_GB_TAFs_Glyco2_Direct24hr
MT-ND1	3_IFT[+947.32303]PAAPVHTNK	HexNAc(1)Hex(1)NeuAc(2)	2019_11_14_GB_TAFs_Glyco3_CTLdirect
MTCH1	3_IFT[+947.32303]PAAPVHTNK	HexNAc(1)Hex(1)NeuAc(2)	2019_11_14_GB_TAFs_Glyco3_CTLdirect
MTX2	3_IFT[+947.32303]PAAPVHTNK	HexNAc(1)Hex(1)NeuAc(2)	2019_11_14_GB_TAFs_Glyco4_Direct24hr
MXRA8	3_IFT[+947.32303]PAAPVHTNK	HexNAc(1)Hex(1)NeuAc(2)	2019_11_14_GB_TAFs_Glyco5_CTLdirect
MYLK	3_IFT[+947.32303]PAAPVHTNK	HexNAc(1)Hex(1)NeuAc(2)	2019_11_14_GB_TAFs_Glyco6_Direct24hr
MYLK	3_IFT[+947.32303]PAAPVHTNK	HexNAc(1)Hex(1)NeuAc(2)	2019_11_14_GB_TAFs_Glyco3_CTLdirect
MYO18A	3_IFT[+947.32303]PAAPVHTNK	HexNAc(1)Hex(1)NeuAc(2)	2019_11_14_GB_TAFs_Glyco4_Direct24hr
MYO1B	3_IFT[+947.32303]PAAPVHTNK	HexNAc(1)Hex(1)NeuAc(2)	2019_11_14_GB_TAFs_Glyco5_CTLdirect
MYO1C	3_IFT[+947.32303]PAAPVHTNK	HexNAc(1)Hex(1)NeuAc(2)	2019_11_14_GB_TAFs_Glyco6_Direct24hr
MYO1C	3_IFT[+947.32303]PAAPVHTNK	HexNAc(1)Hex(1)NeuAc(2)	2019_11_14_GB_TAFs_Glyco1_CTLdirect
MYOF	3_IFT[+947.32303]PAAPVHTNK	HexNAc(1)Hex(1)NeuAc(2)	2019_11_14_GB_TAFs_Glyco1_CTLdirect
MYOF	3_IIS[+1021.35981]SNQELIYEGR	HexNAc(2)Hex(2)NeuAc(1)	2019_11_14_GB_TAFs_Glyco5_CTLdirect
MYOF	3_ISS[+568.21157]LQT[+365.13220]TEK	HexNAc(2)Hex(1)	2019_11_14_GB_TAFs_Glyco4_Direct24hr
NACA	3_KIS[+365.13220]S[+1021.35981]ELEM[+15.99492]LR	HexNAc(1)Hex(1)	2019_11_14_GB_TAFs_Glyco2_Direct24hr
NACA	3_KLS[+406.15875]VPT[+406.15875]SDEEDEVPAPK	HexNAc(2)	2019_11_14_GB_TAFs_Glyco4_Direct24hr
NARS	3_LAS[+203.07937]APVPFTVLSLTGNPC[+57.02146]K	HexNAc(1)	2019_11_14_GB_TAFs_Glyco3_CTLdirect
NCAPG	3_LAS[+203.07937]APVPFTVLSLTGNPC[+57.02146]K	HexNAc(1)	2019_11_14_GB_TAFs_Glyco3_CTLdirect
NCAPG	3_LDS[+203.07937]ELTAR	HexNAc(1)	2019_11_14_GB_TAFs_Glyco3_CTLdirect
NCOR1	3_LGT[+947.32303]QPYFFNK	HexNAc(1)Hex(1)NeuAc(2)	2019_11_14_GB_TAFs_Glyco6_Direct24hr
NCOR1	3_LTT[+1238.41845]LIELLLPK	HexNAc(1)Hex(1)NeuAc(3)	2019_11_14_GB_TAFs_Glyco4_Direct24hr
NCOR1	3_LTT[+406.15875]DFNVIVEALS[+365.13220]K	HexNAc(2)	2019_11_14_GB_TAFs_Glyco2_Direct24hr
NDRG1	3_LTT[+406.15875]DFNVIVEALS[+365.13220]K	HexNAc(2)	2019_11_14_GB_TAFs_Glyco2_Direct24hr
NDRG1	3_LVT[+203.07937]PVTVSAVKPAVTTLVVK	HexNAc(1)	2019_11_14_GB_TAFs_Glyco1_CTLdirect
NDUFB4	3_LVT[+203.07937]PVTVSAVKPAVTTLVVK	HexNAc(1)	2019_11_14_GB_TAFs_Glyco1_CTLdirect
NOMO2	3_LVT[+203.07937]SADGKPTTIITTT[+203.07937]QASGAGTKPTILGISSVSPS[+203.07937]TTKPGTTTIIK	HexNAc(1)	2019_11_14_GB_TAFs_Glyco1_CTLdirect
NPC1	3_LVT[+203.07937]SADGKPTTIITTT[+203.07937]QASGAGTKPTILGISSVSPS[+203.07937]TTKPGTTTIIK	HexNAc(1)	2019_11_14_GB_TAFs_Glyco1_CTLdirect
NT5E	3_M[+15.99492]AT[+203.07937]VRPPVAVKPATAAK	HexNAc(1)	2019_11_14_GB_TAFs_Glyco5_CTLdirect
NUCB1	3_PGT[+406.15875]ILTK	HexNAc(2)	2019_11_14_GB_TAFs_Glyco4_Direct24hr
NUCB1	3_PIS[+406.15875]VEGS[+1312.45523]S[+406.15875]K	HexNAc(2)	2019_11_14_GB_TAFs_Glyco4_Direct24hr
NUCB1	3_PLT[+1021.35981]SSSAK	HexNAc(2)Hex(2)NeuAc(1)	2019_11_14_GB_TAFs_Glyco1_CTLdirect
NUCB1	3_PT[+203.07937]S[+406.15875]AYYTR	HexNAc(2)	2019_11_14_GB_TAFs_Glyco4_Direct24hr
NUCB1	3_PT[+365.13220]T[+1312.45523]HEK	HexNAc(2)Hex(2)NeuAc(2)	2019_11_14_GB_TAFs_Glyco6_Direct24hr
NUCB1	3_S[+568.21157]LS[+568.21157]MELTIQK	HexNAc(2)Hex(1)	2019_11_14_GB_TAFs_Glyco4_Direct24hr
NUCB1	3_S[+947.32303]QT[+203.07937]EK	HexNAc(1)	2019_11_14_GB_TAFs_Glyco2_Direct24hr
NUCB1	3_SET[+203.07937]VVERMLS[+656.22761]NWMSIC[+57.02146]LYQYLK	HexNAc(1)	2019_11_14_GB_TAFs_Glyco4_Direct24hr
NUCB1	3_T[+1312.45523]C[+57.02146]S[+568.21157]PK	HexNAc(2)Hex(1)	2019_11_14_GB_TAFs_Glyco2_Direct24hr
NUCB1	3_TET[+947.32303]GATETVTPSEAPVLAAEPEADKGTVLALTENNFDDTIAEGITFIK	HexNAc(1)Hex(1)NeuAc(2)	2019_11_14_GB_TAFs_Glyco1_CTLdirect
NUCB1	3_TPS[+1238.41845]T[+1238.41845]NVKPK	HexNAc(1)Hex(1)NeuAc(3)	2019_11_14_GB_TAFs_Glyco2_Direct24hr
NUCB1	3_VKS[+406.15875]IS[+406.15875]MTTFTQQEIEFLQK	HexNAc(2)	2019_11_14_GB_TAFs_Glyco4_Direct24hr
NUCB1	3_VLS[+203.07937]SAIPVAGAPLVTATTTAVSSVLLAPSVFQQTVTR	HexNAc(1)	2019_11_14_GB_TAFs_Glyco3_CTLdirect
NUCB1	3_VLS[+568.21157]VET[+568.21157]PLS[+568.21157]IQAHPNKELAEK	HexNAc(2)Hex(1)	2019_11_14_GB_TAFs_Glyco6_Direct24hr
NUCB1	3_VM[+15.99492]S[+203.07937]VVQTKPVQTSAVTGQASTGPVTQIIQTK	HexNAc(1)	2019_11_14_GB_TAFs_Glyco1_CTLdirect
NUCB1	3_VM[+15.99492]S[+203.07937]VVQTKPVQTSAVTGQASTGPVTQIIQTK	HexNAc(1)	2019_11_14_GB_TAFs_Glyco2_Direct24hr
NUCB1	3_VM[+15.99492]S[+203.07937]VVQTKPVQTSAVTGQASTGPVTQIIQTK	HexNAc(1)	2019_11_14_GB_TAFs_Glyco5_CTLdirect
NUCB1	3_VM[+15.99492]S[+203.07937]VVQTKPVQTSAVTGQASTGPVTQIIQTK	HexNAc(1)	2019_11_14_GB_TAFs_Glyco6_Direct24hr
NUCB1	3_VM[+15.99492]S[+568.21157]VVQT[+568.21157]K	HexNAc(2)Hex(1)	2019_11_14_GB_TAFs_Glyco4_Direct24hr
NUCB1	3_WDS[+203.07937]AIPVTTIAQPT[+203.07937]ILTTTATLPAVVTVTTSASGSK	HexNAc(1)	2019_11_14_GB_TAFs_Glyco6_Direct24hr
NUCB1	3_WDS[+203.07937]AIPVTTIAQPTILTTT[+203.07937]ATLPAVVTVTTSASGSK	HexNAc(1)	2019_11_14_GB_TAFs_Glyco4_Direct24hr
NUCB1	30_LGLQLLELPPEESLPLGPLLGDTAVIQGDT[+406.15875]ALITR	HexNAc(2)	2019_11_14_GB_TAFs_Glyco5_CTLdirect
NUCB1	31_APQTPLM[+15.99492]PSFSAPSGTGLLPTPITQQASLTS[+203.07937]LAQGTGTTSAITFPEEQEDPR	HexNAc(1)	2019_11_14_GB_TAFs_Glyco2_Direct24hr
NUCB1	31_SPAPAAAAPAVQPLTQVGITLLPQAAPAPPT[+406.15875]TTTIQVLPTVPGSSISVPTAAR	HexNAc(2)	2019_11_14_GB_TAFs_Glyco2_Direct24hr
NUCB1	31_SPAPAAAAPAVQPLTQVGITLLPQAAPAPPT[+406.15875]TTTIQVLPTVPGSSISVPTAAR	HexNAc(2)	2019_11_14_GB_TAFs_Glyco4_Direct24hr
NUP153	31_SPAPAAAAPAVQPLTQVGITLLPQAAPAPPT[+406.15875]TTTIQVLPTVPGSSISVPTAAR	HexNAc(2)	2019_11_14_GB_TAFs_Glyco5_CTLdirect
NUP153	31_SPAPAAAAPAVQPLTQVGITLLPQAAPAPPT[+406.15875]TTTIQVLPTVPGSSISVPTAAR	HexNAc(2)	2019_11_14_GB_TAFs_Glyco6_Direct24hr
NUP153	31_SPAPAAAAPAVQPLTQVGITLLPQAAPAPPT[+406.15875]TTTIQVLPTVPGSSISVPTAAR	HexNAc(2)	2019_11_14_GB_TAFs_Glyco2_Direct24hr
NUP153	31_SPAPAAAAPAVQPLTQVGITLLPQAAPAPPT[+406.15875]TTTIQVLPTVPGSSISVPTAAR	HexNAc(2)	2019_11_14_GB_TAFs_Glyco3_CTLdirect
NUP153	31_SPAPAAAAPAVQPLTQVGITLLPQAAPAPPT[+406.15875]TTTIQVLPTVPGSSISVPTAAR	HexNAc(2)	2019_11_14_GB_TAFs_Glyco4_Direct24hr
NUP153	31_TPGPAVAIQSVRC[+57.02146]YSHGS[+203.07937]QET[+406.15875]DEEFDARWVT[+406.15875]YFNKPDIDAWELR	HexNAc(2)	2019_11_14_GB_TAFs_Glyco4_Direct24hr
NUP153	31_TPGPAVAIQSVRC[+57.02146]YSHGS[+406.15875]QET[+406.15875]DEEFDARWVT[+203.07937]YFNKPDIDAWELR	HexNAc(1)	2019_11_14_GB_TAFs_Glyco4_Direct24hr
NUP153	32_SPAPAAAAPAVQPLTQVGITLLPQAAPAPPTT[+406.15875]TTIQVLPTVPGSSISVPTAAR	HexNAc(2)	2019_11_14_GB_TAFs_Glyco1_CTLdirect
NUP153	32_SPAPAAAAPAVQPLTQVGITLLPQAAPAPPTT[+406.15875]TTIQVLPTVPGSSISVPTAAR	HexNAc(2)	2019_11_14_GB_TAFs_Glyco4_Direct24hr
NUP153	32_SPAPAAAAPAVQPLTQVGITLLPQAAPAPPTT[+406.15875]TTIQVLPTVPGSSISVPTAAR	HexNAc(2)	2019_11_14_GB_TAFs_Glyco5_CTLdirect
NUP153	32_SPAPAAAAPAVQPLTQVGITLLPQAAPAPPTT[+406.15875]TTIQVLPTVPGSSISVPTAAR	HexNAc(2)	2019_11_14_GB_TAFs_Glyco6_Direct24hr
NUP155	32_SPAPAAAAPAVQPLTQVGITLLPQAAPAPPTT[+406.15875]TTIQVLPTVPGSSISVPTAAR	HexNAc(2)	2019_11_14_GB_TAFs_Glyco6_Direct24hr
NUP155	32_STLKPQPAPQAGPIPVAPIGTLKPQPQPVPAS[+203.07937]YTTASTSSRPTFNVQVK	HexNAc(1)	2019_11_14_GB_TAFs_Glyco2_Direct24hr
NUP155	32_TETGATETVTPSEAPVLAAEPEADKGTVLALT[+203.07937]ENN[+0.98402]FDDTIAEGITFIK	HexNAc(1)	2019_11_14_GB_TAFs_Glyco6_Direct24hr
NUP155	32_TETGATETVTPSEAPVLAAEPEADKGTVLALT[+203.07937]ENNFDDTIAEGITFIK	HexNAc(1)	2019_11_14_GB_TAFs_Glyco3_CTLdirect
NUP214	32_TETGATETVTPSEAPVLAAEPEADKGTVLALT[+203.07937]ENNFDDTIAEGITFIK	HexNAc(1)	2019_11_14_GB_TAFs_Glyco6_Direct24hr
NUP214	32_TETGATETVTPSEAPVLAAEPEADKGTVLALT[+365.13220]ENNFDDTIAEGITFIK	HexNAc(1)Hex(1)	2019_11_14_GB_TAFs_Glyco3_CTLdirect
NUP214	32_TETGATETVTPSEAPVLAAEPEADKGTVLALT[+406.15875]ENNFDDTIAEGITFIK	HexNAc(2)	2019_11_14_GB_TAFs_Glyco1_CTLdirect
NUP214	32_TETGATETVTPSEAPVLAAEPEADKGTVLALT[+656.22761]ENNFDDTIAEGITFIK	HexNAc(1)Hex(1)NeuAc(1)	2019_11_14_GB_TAFs_Glyco1_CTLdirect
NUP93	32_TETGATETVTPSEAPVLAAEPEADKGTVLALT[+656.22761]ENNFDDTIAEGITFIK	HexNAc(1)Hex(1)NeuAc(1)	2019_11_14_GB_TAFs_Glyco1_CTLdirect
NUP93	32_TETGATETVTPSEAPVLAAEPEADKGTVLALT[+656.22761]ENNFDDTIAEGITFIK	HexNAc(1)Hex(1)NeuAc(1)	2019_11_14_GB_TAFs_Glyco4_Direct24hr
NUP98	32_TETGATETVTPSEAPVLAAEPEADKGTVLALT[+947.32303]ENNFDDTIAEGITFIK	HexNAc(1)Hex(1)NeuAc(2)	2019_11_14_GB_TAFs_Glyco3_CTLdirect
OGT	33_SPAPAAAAPAVQPLTQVGITLLPQAAPAPPTTT[+406.15875]TIQVLPTVPGSSISVPTAAR	HexNAc(2)	2019_11_14_GB_TAFs_Glyco3_CTLdirect
OSBPL5	33_SPAPAAAAPAVQPLTQVGITLLPQAAPAPPTTT[+406.15875]TIQVLPTVPGSSISVPTAAR	HexNAc(2)	2019_11_14_GB_TAFs_Glyco3_CTLdirect
OSBPL5	33_SPAPAAAAPAVQPLTQVGITLLPQAAPAPPTTT[+406.15875]TIQVLPTVPGSSISVPTAAR	HexNAc(2)	2019_11_14_GB_TAFs_Glyco4_Direct24hr
PAICS	33_SPAPAAAAPAVQPLTQVGITLLPQAAPAPPTTT[+406.15875]TIQVLPTVPGSSISVPTAAR	HexNAc(2)	2019_11_14_GB_TAFs_Glyco6_Direct24hr
PALLD	33_TQTQSAPALQGLSSLLQSVTGNPVPASEAASQS[+203.07937]TSASPANTTVSTIK	HexNAc(1)	2019_11_14_GB_TAFs_Glyco5_CTLdirect
PALLD	33_VVKQASEGPLKGILGYT[+568.21157]EHQVVS[+1021.35981]SDFNSDTHSS[+1312.45523]TFDAGAGIALNDHFVK	HexNAc(2)Hex(2)NeuAc(2)	2019_11_14_GB_TAFs_Glyco6_Direct24hr
PALLD	34_LVTSADGKPTTIITTTQASGAGTKPTILGISSVS[+406.15875]PS[+203.07937]TTKPGTTTIIK	HexNAc(2)	2019_11_14_GB_TAFs_Glyco4_Direct24hr
PALLD	34_SPAPAAAAPAVQPLTQVGITLLPQAAPAPPTTTT[+406.15875]IQVLPTVPGSSISVPTAAR	HexNAc(2)	2019_11_14_GB_TAFs_Glyco2_Direct24hr
PARP14	34_SPAPAAAAPAVQPLTQVGITLLPQAAPAPPTTTT[+406.15875]IQVLPTVPGSSISVPTAAR	HexNAc(2)	2019_11_14_GB_TAFs_Glyco4_Direct24hr
PARP14	34_SPAPAAAAPAVQPLTQVGITLLPQAAPAPPTTTT[+406.15875]IQVLPTVPGSSISVPTAAR	HexNAc(2)	2019_11_14_GB_TAFs_Glyco2_Direct24hr
PARP4	34_SPAPAAAAPAVQPLTQVGITLLPQAAPAPPTTTT[+406.15875]IQVLPTVPGSSISVPTAAR	HexNAc(2)	2019_11_14_GB_TAFs_Glyco3_CTLdirect
PARP4	34_SPAPAAAAPAVQPLTQVGITLLPQAAPAPPTTTT[+406.15875]IQVLPTVPGSSISVPTAAR	HexNAc(2)	2019_11_14_GB_TAFs_Glyco4_Direct24hr
PCM1	34_STLKPQPAPQAGPIPVAPIGTLKPQPQPVPASYT[+203.07937]TASTSSRPTFNVQVK	HexNAc(1)	2019_11_14_GB_TAFs_Glyco2_Direct24hr
PCM1	36_LVT[+203.07937]SADGKPTTIITTT[+203.07937]QASGAGTKPTILGISSVSPS[+203.07937]TTKPGTTTIIK	HexNAc(1)	2019_11_14_GB_TAFs_Glyco1_CTLdirect
PCYOX1	36_LVT[+203.07937]SADGKPTTIITTT[+203.07937]QASGAGTKPTILGISSVSPS[+203.07937]TTKPGTTTIIK	HexNAc(1)	2019_11_14_GB_TAFs_Glyco1_CTLdirect
PDE1C	36_LVTSADGKPTTIIT[+203.07937]TTQASGAGTKPTILGISSVSPS[+406.15875]TTKPGTTTIIK	HexNAc(2)	2019_11_14_GB_TAFs_Glyco1_CTLdirect
PICALM	36_LVTSADGKPTTIITTT[+203.07937]QASGAGTKPTILGISSVSPS[+406.15875]TTKPGTTTIIK	HexNAc(2)	2019_11_14_GB_TAFs_Glyco6_Direct24hr
PICALM	36_LVTSADGKPTTIITTTQASGAGTKPTILGISSVS[+406.15875]PS[+203.07937]TTKPGTTTIIK	HexNAc(1)	2019_11_14_GB_TAFs_Glyco4_Direct24hr
PICALM	36_LVTSADGKPTTIITTTQASGAGTKPTILGISSVSPS[+203.07937]T[+406.15875]TKPGTTTIIK	HexNAc(1)	2019_11_14_GB_TAFs_Glyco4_Direct24hr
PICALM	36_LVTSADGKPTTIITTTQASGAGTKPTILGISSVSPS[+203.07937]T[+406.15875]TKPGTTTIIK	HexNAc(1)	2019_11_14_GB_TAFs_Glyco5_CTLdirect
PICALM	36_LVTSADGKPTTIITTTQASGAGTKPTILGISSVSPS[+203.07937]TT[+406.15875]KPGTTTIIK	HexNAc(1)	2019_11_14_GB_TAFs_Glyco2_Direct24hr
PICALM	36_LVTSADGKPTTIITTTQASGAGTKPTILGISSVSPS[+406.15875]T[+203.07937]TKPGTTTIIK	HexNAc(2)	2019_11_14_GB_TAFs_Glyco2_Direct24hr
PICALM	37_LVTS[+203.07937]ADGKPTTIIT[+203.07937]TTQASGAGTKPTILGISSVSPST[+203.07937]TKPGTTTIIK	HexNAc(1)	2019_11_14_GB_TAFs_Glyco2_Direct24hr
PIGS	37_LVTSADGKPTTIITTTQASGAGTKPTILGISSVSPS[+203.07937]T[+406.15875]TKPGTTTIIK	HexNAc(2)	2019_11_14_GB_TAFs_Glyco4_Direct24hr
PIGS	37_LVTSADGKPTTIITTTQASGAGTKPTILGISSVSPS[+203.07937]T[+406.15875]TKPGTTTIIK	HexNAc(2)	2019_11_14_GB_TAFs_Glyco5_CTLdirect
PIGS	37_LVTSADGKPTTIITTTQASGAGTKPTILGISSVSPS[+406.15875]T[+203.07937]TKPGTTTIIK	HexNAc(1)	2019_11_14_GB_TAFs_Glyco2_Direct24hr
PLXNB2	37_LVTSADGKPTTIITTTQASGAGTKPTILGISSVSPS[+406.15875]T[+203.07937]TKPGTTTIIK	HexNAc(1)	2019_11_14_GB_TAFs_Glyco2_Direct24hr
PLXNB2	38_LVTS[+203.07937]ADGKPTTIITT[+203.07937]TQASGAGTKPTILGISSVSPSTT[+203.07937]KPGTTTIIK	HexNAc(1)	2019_11_14_GB_TAFs_Glyco2_Direct24hr
PMPCA	38_LVTS[+203.07937]ADGKPTTIITT[+203.07937]TQASGAGTKPTILGISSVSPSTT[+203.07937]KPGTTTIIK	HexNAc(1)	2019_11_14_GB_TAFs_Glyco2_Direct24hr
PMPCA	38_LVTS[+203.07937]ADGKPTTIITTT[+203.07937]QASGAGTKPTILGISSVSPSTT[+203.07937]KPGTTTIIK	HexNAc(1)	2019_11_14_GB_TAFs_Glyco5_CTLdirect
PMPCB	38_LVTS[+203.07937]ADGKPTTIITTT[+203.07937]QASGAGTKPTILGISSVSPSTT[+203.07937]KPGTTTIIK	HexNAc(1)	2019_11_14_GB_TAFs_Glyco5_CTLdirect
PMPCB	38_LVTSADGKPTTIITTTQASGAGTKPTILGISSVSPS[+203.07937]TT[+406.15875]KPGTTTIIK	HexNAc(2)	2019_11_14_GB_TAFs_Glyco2_Direct24hr
PNPO	38_LVTSADGKPTTIITTTQASGAGTKPTILGISSVSPS[+203.07937]TT[+406.15875]KPGTTTIIK	HexNAc(2)	2019_11_14_GB_TAFs_Glyco2_Direct24hr
PNPO	39_APQTPLM[+15.99492]PSFSAPSGTGLLPTPITQQASLTSLAQGTGTT[+203.07937]SAITFPEEQEDPR	HexNAc(1)	2019_11_14_GB_TAFs_Glyco2_Direct24hr
POLDIP2	39_APQTPLM[+15.99492]PSFSAPSGTGLLPTPITQQASLTSLAQGTGTT[+203.07937]SAITFPEEQEDPR	HexNAc(1)	2019_11_14_GB_TAFs_Glyco4_Direct24hr
POLR1A	39_TETGATETVTPSEAPVLAAEPEADKGTVLALTENNFDDT[+203.07937]IAEGITFIK	HexNAc(1)	2019_11_14_GB_TAFs_Glyco2_Direct24hr
POLR1B	39_TETGATETVTPSEAPVLAAEPEADKGTVLALTENNFDDT[+203.07937]IAEGITFIK	HexNAc(1)	2019_11_14_GB_TAFs_Glyco5_CTLdirect
POLR2A	39_TETGATETVTPSEAPVLAAEPEADKGTVLALTENNFDDT[+203.07937]IAEGITFIK	HexNAc(1)	2019_11_14_GB_TAFs_Glyco2_Direct24hr
POLR2A	39_TETGATETVTPSEAPVLAAEPEADKGTVLALTENNFDDT[+203.07937]IAEGITFIK	HexNAc(1)	2019_11_14_GB_TAFs_Glyco5_CTLdirect
POR	4_[+42.01056]M[+15.99492]PS[+568.21157]T[+1238.41845]DLLMLK	HexNAc(1)Hex(1)NeuAc(3)	2019_11_14_GB_TAFs_Glyco3_CTLdirect
PPFIA1	4_AGFS[+1238.41845]EKFLN[+0.98402]EMIAPVMR	HexNAc(1)Hex(1)NeuAc(3)	2019_11_14_GB_TAFs_Glyco2_Direct24hr
PPFIA1	4_APQT[+203.07937]PLM[+15.99492]PSFSAPSGTGLLPTPITQQASLTSLAQGTGTTSAITFPEEQEDPR	HexNAc(1)	2019_11_14_GB_TAFs_Glyco2_Direct24hr
PPP1R12A	4_APQT[+203.07937]PLM[+15.99492]PSFSAPSGTGLLPTPITQQASLTSLAQGTGTTSAITFPEEQEDPR	HexNAc(1)	2019_11_14_GB_TAFs_Glyco4_Direct24hr
PPP1R12A	4_APQT[+203.07937]PLM[+15.99492]PSFSAPSGTGLLPTPITQQASLTSLAQGTGTTSAITFPEEQEDPR	HexNAc(1)	2019_11_14_GB_TAFs_Glyco2_Direct24hr
PPP1R12A	4_DFQT[+203.07937]LENWM[+15.99492]LQTLNEEPVTPEPEVEPPSAPELK	HexNAc(1)	2019_11_14_GB_TAFs_Glyco2_Direct24hr
PPP1R12A	4_DFQT[+203.07937]LENWM[+15.99492]LQTLNEEPVTPEPEVEPPSAPELK	HexNAc(1)	2019_11_14_GB_TAFs_Glyco3_CTLdirect
PPP1R12A	4_DFQT[+365.13220]LENWM[+15.99492]LQTLN[+0.98402]EEPVTPEPEVEPPSAPELK	HexNAc(1)Hex(1)	2019_11_14_GB_TAFs_Glyco3_CTLdirect
PPP1R12A	4_DT[+568.21157]ET[+568.21157]VLK	HexNAc(2)Hex(1)	2019_11_14_GB_TAFs_Glyco6_Direct24hr
PPP1R12A	4_DVFS[+365.13220]VET[+365.13220]PK	HexNAc(1)Hex(1)	2019_11_14_GB_TAFs_Glyco4_Direct24hr
PPP1R12A	4_DYIT[+1021.35981]K	HexNAc(2)Hex(2)NeuAc(1)	2019_11_14_GB_TAFs_Glyco4_Direct24hr
PPP1R12A	4_EGVT[+203.07937]PWAS[+656.22761]FK	HexNAc(1)	2019_11_14_GB_TAFs_Glyco4_Direct24hr
PPP1R12A	4_EN[+0.98402]QT[+1238.41845]AVDVFR	HexNAc(1)Hex(1)NeuAc(3)	2019_11_14_GB_TAFs_Glyco2_Direct24hr
PPP1R12A	4_FGVS[+203.07937]SSSSGPSQTLTSTGNFK	HexNAc(1)	2019_11_14_GB_TAFs_Glyco5_CTLdirect
PPP1R12A	4_GAET[+656.22761]LVT[+1312.45523]R	HexNAc(1)Hex(1)NeuAc(1)	2019_11_14_GB_TAFs_Glyco2_Direct24hr
PPP2R5D	4_GAET[+656.22761]LVT[+1312.45523]R	HexNAc(1)Hex(1)NeuAc(1)	2019_11_14_GB_TAFs_Glyco2_Direct24hr
PREP	4_GIET[+568.21157]S[+568.21157]GT[+568.21157]FAVK	HexNAc(2)Hex(1)	2019_11_14_GB_TAFs_Glyco6_Direct24hr
PREP	4_GLHS[+1312.45523]K	HexNAc(2)Hex(2)NeuAc(2)	2019_11_14_GB_TAFs_Glyco4_Direct24hr
PRKAA1	4_GLHS[+1312.45523]K	HexNAc(2)Hex(2)NeuAc(2)	2019_11_14_GB_TAFs_Glyco4_Direct24hr
PRKAA1	4_GQT[+406.15875]S[+406.15875]TYGFLK	HexNAc(2)	2019_11_14_GB_TAFs_Glyco3_CTLdirect
PRKCSH	4_GYT[+203.07937]S[+656.22761]K	HexNAc(1)Hex(1)NeuAc(1)	2019_11_14_GB_TAFs_Glyco2_Direct24hr
PRKCSH	4_HLES[+406.15875]S[+1312.45523]DEDEK	HexNAc(2)	2019_11_14_GB_TAFs_Glyco4_Direct24hr
PRKCSH	4_IPIS[+947.32303]ALVSFVEALEVGYSK	HexNAc(1)Hex(1)NeuAc(2)	2019_11_14_GB_TAFs_Glyco1_CTLdirect
PRKCSH	4_KIFT[+1312.45523]FAEK	HexNAc(2)Hex(2)NeuAc(2)	2019_11_14_GB_TAFs_Glyco2_Direct24hr
PRKCSH	4_KIS[+365.13220]S[+1021.35981]ELEM[+15.99492]LR	HexNAc(2)Hex(2)NeuAc(1)	2019_11_14_GB_TAFs_Glyco2_Direct24hr
PRKCSH	4_KIVS[+947.32303]WLEYESSFSNEEAQK	HexNAc(1)Hex(1)NeuAc(2)	2019_11_14_GB_TAFs_Glyco2_Direct24hr
PRKCSH	4_KLES[+406.15875]YFQS[+947.32303]S[+406.15875]K	HexNAc(2)	2019_11_14_GB_TAFs_Glyco2_Direct24hr
PRKCSH	4_KLET[+406.15875]NPDIK	HexNAc(2)	2019_11_14_GB_TAFs_Glyco4_Direct24hr
PRKCSH	4_KLLS[+568.21157]PS[+1312.45523]N[+0.98402]EK	HexNAc(2)Hex(1)	2019_11_14_GB_TAFs_Glyco4_Direct24hr
PRKCSH	4_KLQS[+406.15875]EDS[+406.15875]AK	HexNAc(2)	2019_11_14_GB_TAFs_Glyco2_Direct24hr
PRKCSH	4_KLRS[+203.07937]T[+1312.45523]M[+15.99492]LELEK	HexNAc(1)	2019_11_14_GB_TAFs_Glyco2_Direct24hr
PRKCSH	4_KT[+365.13220]ET[+1312.45523]MNVVMETNK	HexNAc(2)Hex(2)NeuAc(2)	2019_11_14_GB_TAFs_Glyco3_CTLdirect
PRKCSH	4_LAGT[+656.22761]ESPVREEPGEDFPAAR	HexNAc(1)Hex(1)NeuAc(1)	2019_11_14_GB_TAFs_Glyco3_CTLdirect
PRKCSH	4_LAGT[+656.22761]ESPVREEPGEDFPAAR	HexNAc(1)Hex(1)NeuAc(1)	2019_11_14_GB_TAFs_Glyco6_Direct24hr
PRKCSH	4_LAGT[+947.32303]ESPVREEPGEDFPAAR	HexNAc(1)Hex(1)NeuAc(2)	2019_11_14_GB_TAFs_Glyco2_Direct24hr
PRKCSH	4_LAGT[+947.32303]ESPVREEPGEDFPAAR	HexNAc(1)Hex(1)NeuAc(2)	2019_11_14_GB_TAFs_Glyco3_CTLdirect
PRKCSH	4_LAGT[+947.32303]ESPVREEPGEDFPAAR	HexNAc(1)Hex(1)NeuAc(2)	2019_11_14_GB_TAFs_Glyco4_Direct24hr
PRKCSH	4_LAGT[+947.32303]ESPVREEPGEDFPAAR	HexNAc(1)Hex(1)NeuAc(2)	2019_11_14_GB_TAFs_Glyco5_CTLdirect
PRKDC	4_LAGT[+947.32303]ESPVREEPGEDFPAAR	HexNAc(1)Hex(1)NeuAc(2)	2019_11_14_GB_TAFs_Glyco5_CTLdirect
PRKDC	4_LAGT[+947.32303]ESPVREEPGEDFPAAR	HexNAc(1)Hex(1)NeuAc(2)	2019_11_14_GB_TAFs_Glyco6_Direct24hr
PRKDC	4_LAGT[+947.32303]ESPVREEPGEDFPAAR	HexNAc(1)Hex(1)NeuAc(2)	2019_11_14_GB_TAFs_Glyco2_Direct24hr
PRKDC	4_LAGT[+947.32303]ESPVREEPGEDFPAAR	HexNAc(1)Hex(1)NeuAc(2)	2019_11_14_GB_TAFs_Glyco3_CTLdirect
PRKDC	4_LAGT[+947.32303]ESPVREEPGEDFPAAR	HexNAc(1)Hex(1)NeuAc(2)	2019_11_14_GB_TAFs_Glyco4_Direct24hr
PRRC1	4_LAGT[+947.32303]ESPVREEPGEDFPAAR	HexNAc(1)Hex(1)NeuAc(2)	2019_11_14_GB_TAFs_Glyco5_CTLdirect
PRRC1	4_LAGT[+947.32303]ESPVREEPGEDFPAAR	HexNAc(1)Hex(1)NeuAc(2)	2019_11_14_GB_TAFs_Glyco6_Direct24hr
PRRC1	4_LAGT[+947.32303]ESPVREEPGEDFPAAR	HexNAc(1)Hex(1)NeuAc(2)	2019_11_14_GB_TAFs_Glyco1_CTLdirect
PRRC1	4_LAST[+406.15875]IS[+656.22761]IDPK	HexNAc(2)	2019_11_14_GB_TAFs_Glyco2_Direct24hr
PRRC1	4_LEGT[+1238.41845]NVQEAQK	HexNAc(1)Hex(1)NeuAc(3)	2019_11_14_GB_TAFs_Glyco2_Direct24hr
PSMA4	4_LEVT[+947.32303]DGPPATPAYWDGEKEVLAVAR	HexNAc(1)Hex(1)NeuAc(2)	2019_11_14_GB_TAFs_Glyco6_Direct24hr
PSMD12	4_LLC[+57.02146]T[+1238.41845]AT[+203.07937]K	HexNAc(1)Hex(1)NeuAc(3)	2019_11_14_GB_TAFs_Glyco4_Direct24hr
PSMD12	4_LLLS[+365.13220]LDDFNN[+0.98402]WISK	HexNAc(1)Hex(1)	2019_11_14_GB_TAFs_Glyco4_Direct24hr
PSMD12	4_LS[+1312.45523]FS[+568.21157]EINT[+1312.45523]R	HexNAc(2)Hex(1)	2019_11_14_GB_TAFs_Glyco1_CTLdirect
PSMD12	4_LS[+568.21157]FS[+1312.45523]EINT[+1312.45523]R	HexNAc(2)Hex(2)NeuAc(2)	2019_11_14_GB_TAFs_Glyco1_CTLdirect
PSMD13	4_LS[+568.21157]FS[+1312.45523]EINT[+1312.45523]R	HexNAc(2)Hex(2)NeuAc(2)	2019_11_14_GB_TAFs_Glyco1_CTLdirect
PSMD2	4_LT[+1021.35981]DT[+406.15875]LVSK	HexNAc(2)	2019_11_14_GB_TAFs_Glyco4_Direct24hr
PSMD2	4_LVTS[+203.07937]ADGKPTTIIT[+203.07937]TTQASGAGTKPTILGISSVSPST[+203.07937]TKPGTTTIIK	HexNAc(1)	2019_11_14_GB_TAFs_Glyco2_Direct24hr
PSMD2	4_LVTS[+203.07937]ADGKPTTIITT[+203.07937]TQASGAGTKPTILGISSVSPSTT[+203.07937]KPGTTTIIK	HexNAc(1)	2019_11_14_GB_TAFs_Glyco2_Direct24hr
PSMD2	4_LVTS[+203.07937]ADGKPTTIITTT[+203.07937]QASGAGTKPTILGISSVSPSTT[+203.07937]KPGTTTIIK	HexNAc(1)	2019_11_14_GB_TAFs_Glyco5_CTLdirect
PSMD2	4_NVAS[+365.13220]VC[+57.02146]LQIGYPTVASVPHSIINGYK	HexNAc(1)Hex(1)	2019_11_14_GB_TAFs_Glyco1_CTLdirect
PSMD2	4_PDNT[+947.32303]YEVK	HexNAc(1)Hex(1)NeuAc(2)	2019_11_14_GB_TAFs_Glyco2_Direct24hr
PSMD2	4_PFYT[+406.15875]M[+15.99492]PDPR	HexNAc(2)	2019_11_14_GB_TAFs_Glyco6_Direct24hr
PSMD2	4_PGGS[+947.32303]GLT[+656.22761]GAK	HexNAc(1)Hex(1)NeuAc(2)	2019_11_14_GB_TAFs_Glyco2_Direct24hr
PSMD2	4_PPIS[+656.22761]MNFEVPFAPSGLK	HexNAc(1)Hex(1)NeuAc(1)	2019_11_14_GB_TAFs_Glyco1_CTLdirect
PSMD2	4_PT[+365.13220]LS[+568.21157]ELEK	HexNAc(2)Hex(1)	2019_11_14_GB_TAFs_Glyco4_Direct24hr
PSMD2	4_QAVT[+365.13220]NPNNTFYATK	HexNAc(1)Hex(1)	2019_11_14_GB_TAFs_Glyco2_Direct24hr
PSMD2	4_QLGS[+406.15875]RYFALVER	HexNAc(2)	2019_11_14_GB_TAFs_Glyco2_Direct24hr
PSMD2	4_QS[+203.07937]VT[+1238.41845]IKT[+1238.41845]MLEDLGMDDEGDDDPVPLPNVNAAILK	HexNAc(1)Hex(1)NeuAc(3)	2019_11_14_GB_TAFs_Glyco6_Direct24hr
PSMD2	4_RLHS[+365.13220]T[+365.13220]HEELC[+57.02146]TWLDK	HexNAc(1)Hex(1)	2019_11_14_GB_TAFs_Glyco4_Direct24hr
PSMD2	4_S[+406.15875]VIS[+406.15875]FVC[+57.02146]RPEARPTNR	HexNAc(2)	2019_11_14_GB_TAFs_Glyco5_CTLdirect
PSMD2	4_S[+406.15875]VIS[+406.15875]FVC[+57.02146]RPEARPTNR	HexNAc(2)	2019_11_14_GB_TAFs_Glyco6_Direct24hr
PSMD2	4_SPVT[+406.15875]FLS[+568.21157]DLR	HexNAc(2)	2019_11_14_GB_TAFs_Glyco1_CTLdirect
PSMD2	4_T[+1238.41845]S[+1238.41845]MS[+1021.35981]K	HexNAc(2)Hex(2)NeuAc(1)	2019_11_14_GB_TAFs_Glyco4_Direct24hr
PSMD2	4_T[+203.07937]LHS[+406.15875]T[+947.32303]FQPNISQGK	HexNAc(2)	2019_11_14_GB_TAFs_Glyco4_Direct24hr
PSMD2	4_T[+947.32303]S[+1312.45523]MS[+1238.41845]K	HexNAc(1)Hex(1)NeuAc(3)	2019_11_14_GB_TAFs_Glyco4_Direct24hr
PSMD2	4_TPS[+1238.41845]T[+1238.41845]NVKPK	HexNAc(1)Hex(1)NeuAc(3)	2019_11_14_GB_TAFs_Glyco2_Direct24hr
PSMD2	4_TQLT[+568.21157]S[+947.32303]MLMM[+15.99492]NLESR	HexNAc(2)Hex(1)	2019_11_14_GB_TAFs_Glyco6_Direct24hr
PSMD2	4_VAFT[+1021.35981]GS[+406.15875]T[+947.32303]EVGHLIQK	HexNAc(2)Hex(2)NeuAc(1)	2019_11_14_GB_TAFs_Glyco2_Direct24hr
PSMD3	4_VAFT[+1021.35981]GS[+406.15875]T[+947.32303]EVGHLIQK	HexNAc(2)Hex(2)NeuAc(1)	2019_11_14_GB_TAFs_Glyco2_Direct24hr
PSMD6	4_VIES[+568.21157]FIKAEGNLTR	HexNAc(2)Hex(1)	2019_11_14_GB_TAFs_Glyco4_Direct24hr
PSMD6	4_VVFS[+947.32303]QQELR	HexNAc(1)Hex(1)NeuAc(2)	2019_11_14_GB_TAFs_Glyco6_Direct24hr
PTK2	4_VVFS[+947.32303]QQELR	HexNAc(1)Hex(1)NeuAc(2)	2019_11_14_GB_TAFs_Glyco6_Direct24hr
PTK2	4_VVVS[+406.15875]NRLVTSPC[+57.02146]C[+57.02146]IVTSTYGWTANM[+15.99492]ER	HexNAc(2)	2019_11_14_GB_TAFs_Glyco3_CTLdirect
PTPN23	4_VVVS[+406.15875]NRLVTSPC[+57.02146]C[+57.02146]IVTSTYGWTANM[+15.99492]ER	HexNAc(2)	2019_11_14_GB_TAFs_Glyco3_CTLdirect
PTPN23	4_WEFT[+365.13220]SWVPLVSR	HexNAc(1)Hex(1)	2019_11_14_GB_TAFs_Glyco2_Direct24hr
PUS7	4_YEVS[+1238.41845]VYALK	HexNAc(1)Hex(1)NeuAc(3)	2019_11_14_GB_TAFs_Glyco4_Direct24hr
PUS7	4_YEVS[+1238.41845]VYALK	HexNAc(1)Hex(1)NeuAc(3)	2019_11_14_GB_TAFs_Glyco2_Direct24hr
PUS7	4_YHLT[+568.21157]EPGLAS[+568.21157]R	HexNAc(2)Hex(1)	2019_11_14_GB_TAFs_Glyco4_Direct24hr
RAD23B	40_SPAPAAAAPAVQPLT[+203.07937]QVGITLLPQAAPAPPTTTTIQVLPT[+203.07937]VPGSSISVPTAAR	HexNAc(1)	2019_11_14_GB_TAFs_Glyco4_Direct24hr
RAD23B	49_AVSTPAPATTQQSAPAS[+203.07937]TTAVTSSTTTTVAQAPTPVPALAPTSTPASIT[+203.07937]PASATASSEPAPASAAK	HexNAc(1)	2019_11_14_GB_TAFs_Glyco1_CTLdirect
RAD23B	5_AFIIT[+568.21157]INSFGTELSK	HexNAc(2)Hex(1)	2019_11_14_GB_TAFs_Glyco4_Direct24hr
RAD23B	5_ALGIS[+203.07937]S[+947.32303]DSN[+0.98402]K	HexNAc(1)	2019_11_14_GB_TAFs_Glyco3_CTLdirect
RAD23B	5_ALGIS[+203.07937]S[+947.32303]DSN[+0.98402]K	HexNAc(1)	2019_11_14_GB_TAFs_Glyco4_Direct24hr
RAD23B	5_ALGIS[+203.07937]S[+947.32303]DSN[+0.98402]K	HexNAc(1)	2019_11_14_GB_TAFs_Glyco2_Direct24hr
RAD23B	5_ALGIS[+947.32303]S[+203.07937]DSN[+0.98402]K	HexNAc(1)Hex(1)NeuAc(2)	2019_11_14_GB_TAFs_Glyco2_Direct24hr
RAD23B	5_ALGIS[+947.32303]S[+203.07937]DSN[+0.98402]K	HexNAc(1)Hex(1)NeuAc(2)	2019_11_14_GB_TAFs_Glyco3_CTLdirect
RAD23B	5_AQSVS[+365.13220]LLNQLFVR	HexNAc(1)Hex(1)	2019_11_14_GB_TAFs_Glyco1_CTLdirect
RAD23B	5_AVFPS[+947.32303]MIGRPR	HexNAc(1)Hex(1)NeuAc(2)	2019_11_14_GB_TAFs_Glyco2_Direct24hr
RAD23B	5_DIFVT[+365.13220]SK	HexNAc(1)Hex(1)	2019_11_14_GB_TAFs_Glyco2_Direct24hr
RAD23B	5_GIET[+568.21157]S[+568.21157]GT[+568.21157]FAVK	HexNAc(2)Hex(1)	2019_11_14_GB_TAFs_Glyco6_Direct24hr
RAD23B	5_GILLT[+1312.45523]GS[+406.15875]K	HexNAc(2)Hex(2)NeuAc(2)	2019_11_14_GB_TAFs_Glyco5_CTLdirect
RAD23B	5_GLS[+1312.45523]GT[+1312.45523]AVLDLR	HexNAc(2)Hex(2)NeuAc(2)	2019_11_14_GB_TAFs_Glyco3_CTLdirect
RAD23B	5_GSS[+203.07937]AS[+656.22761]LVLK	HexNAc(1)Hex(1)NeuAc(1)	2019_11_14_GB_TAFs_Glyco5_CTLdirect
RAD23B	5_GSS[+203.07937]AS[+656.22761]LVLK	HexNAc(1)Hex(1)NeuAc(1)	2019_11_14_GB_TAFs_Glyco6_Direct24hr
RB1	5_GSS[+656.22761]AS[+203.07937]LVLK	HexNAc(1)	2019_11_14_GB_TAFs_Glyco5_CTLdirect
RB1	5_GSS[+656.22761]AS[+203.07937]LVLK	HexNAc(1)	2019_11_14_GB_TAFs_Glyco6_Direct24hr
RB1	5_GVEPS[+406.15875]PSPIK	HexNAc(2)	2019_11_14_GB_TAFs_Glyco2_Direct24hr
RBM12	5_GVEPS[+406.15875]PSPIK	HexNAc(2)	2019_11_14_GB_TAFs_Glyco2_Direct24hr
RBM12	5_GVLFS[+1021.35981]SK	HexNAc(2)Hex(2)NeuAc(1)	2019_11_14_GB_TAFs_Glyco2_Direct24hr
RBM12	5_GVPGS[+1312.45523]AVLLFEVELVSR	HexNAc(2)Hex(2)NeuAc(2)	2019_11_14_GB_TAFs_Glyco4_Direct24hr
RBM12	5_HLES[+406.15875]S[+1312.45523]DEDEK	HexNAc(2)Hex(2)NeuAc(2)	2019_11_14_GB_TAFs_Glyco4_Direct24hr
RBM12	5_KDN[+0.98402]IT[+365.13220]AHNISWR	HexNAc(1)Hex(1)	2019_11_14_GB_TAFs_Glyco2_Direct24hr
RBM12	5_KEELS[+1021.35981]EEGYLAK	HexNAc(2)Hex(2)NeuAc(1)	2019_11_14_GB_TAFs_Glyco4_Direct24hr
RBM12	5_KEEPS[+1021.35981]N[+0.98402]NVK	HexNAc(2)Hex(2)NeuAc(1)	2019_11_14_GB_TAFs_Glyco2_Direct24hr
RBM12	5_KEHN[+0.98402]S[+1312.45523]K	HexNAc(2)Hex(2)NeuAc(2)	2019_11_14_GB_TAFs_Glyco2_Direct24hr
RBM12	5_KESET[+1238.41845]S[+406.15875]R	HexNAc(1)Hex(1)NeuAc(3)	2019_11_14_GB_TAFs_Glyco4_Direct24hr
RBM12	5_KLNYT[+656.22761]LSQGHR	HexNAc(1)Hex(1)NeuAc(1)	2019_11_14_GB_TAFs_Glyco2_Direct24hr
RBM12	5_KLRS[+203.07937]T[+1312.45523]M[+15.99492]LELEK	HexNAc(2)Hex(2)NeuAc(2)	2019_11_14_GB_TAFs_Glyco2_Direct24hr
RBM12	5_KN[+0.98402]FAT[+1021.35981]SLYSMIK	HexNAc(2)Hex(2)NeuAc(1)	2019_11_14_GB_TAFs_Glyco4_Direct24hr
RBM12	5_KQVFT[+1238.41845]S[+406.15875]EK	HexNAc(1)Hex(1)NeuAc(3)	2019_11_14_GB_TAFs_Glyco3_CTLdirect
RBM12	5_LGDVS[+365.13220]PT[+365.13220]QIDVSQFGSFK	HexNAc(1)Hex(1)	2019_11_14_GB_TAFs_Glyco6_Direct24hr
RBM12	5_LGHET[+568.21157]LR	HexNAc(2)Hex(1)	2019_11_14_GB_TAFs_Glyco1_CTLdirect
RBM12	5_LLAES[+365.13220]VT[+406.15875]EVEIFGK	HexNAc(1)Hex(1)	2019_11_14_GB_TAFs_Glyco2_Direct24hr
RBM12	5_LS[+203.07937]EVT[+656.22761]FRPLFFK	HexNAc(1)Hex(1)NeuAc(1)	2019_11_14_GB_TAFs_Glyco3_CTLdirect
RBM12	5_LYAPT[+947.32303]HKEAEFQAPPEPIQQEVER	HexNAc(1)Hex(1)NeuAc(2)	2019_11_14_GB_TAFs_Glyco5_CTLdirect
RBM12	5_LYAPT[+947.32303]HKEAEFQAPPEPIQQEVER	HexNAc(1)Hex(1)NeuAc(2)	2019_11_14_GB_TAFs_Glyco6_Direct24hr
RBM12	5_N[+0.98402]PIM[+15.99492]S[+1312.45523]QC[+57.02146]FDR	HexNAc(2)Hex(2)NeuAc(2)	2019_11_14_GB_TAFs_Glyco5_CTLdirect
RBM12	5_N[+0.98402]PIM[+15.99492]S[+1312.45523]QC[+57.02146]FDR	HexNAc(2)Hex(2)NeuAc(2)	2019_11_14_GB_TAFs_Glyco1_CTLdirect
RBM15	5_N[+0.98402]PIM[+15.99492]S[+1312.45523]QC[+57.02146]FDR	HexNAc(2)Hex(2)NeuAc(2)	2019_11_14_GB_TAFs_Glyco1_CTLdirect
RHEB	5_N[+0.98402]PIM[+15.99492]S[+1312.45523]QC[+57.02146]FDR	HexNAc(2)Hex(2)NeuAc(2)	2019_11_14_GB_TAFs_Glyco1_CTLdirect
RIF1	5_NLLLS[+656.22761]GDN[+0.98402]ELYPLSPGK	HexNAc(1)Hex(1)NeuAc(1)	2019_11_14_GB_TAFs_Glyco3_CTLdirect
RNF213	5_NLNNS[+406.15875]N[+0.98402]LFSPVNR	HexNAc(2)	2019_11_14_GB_TAFs_Glyco4_Direct24hr
RNPEP	5_NLVQS[+365.13220]MQVLSGVFTDVEASLKDIR	HexNAc(1)Hex(1)	2019_11_14_GB_TAFs_Glyco2_Direct24hr
RPL4	5_PFGVS[+568.21157]LLYIGWDK	HexNAc(2)Hex(1)	2019_11_14_GB_TAFs_Glyco3_CTLdirect
RPL4	5_PILQS[+203.07937]LLLPVM[+15.99492]DQDYAK	HexNAc(1)	2019_11_14_GB_TAFs_Glyco6_Direct24hr
RPLP0	5_PILQS[+203.07937]LLLPVM[+15.99492]DQDYAK	HexNAc(1)	2019_11_14_GB_TAFs_Glyco6_Direct24hr
RPLP0	5_QALET[+406.15875]VN[+0.98402]DYNPLM[+15.99492]K	HexNAc(2)	2019_11_14_GB_TAFs_Glyco4_Direct24hr
RPLP2	5_QALET[+406.15875]VN[+0.98402]DYNPLM[+15.99492]K	HexNAc(2)	2019_11_14_GB_TAFs_Glyco4_Direct24hr
RPLP2	5_QDILT[+1312.45523]IFK	HexNAc(2)Hex(2)NeuAc(2)	2019_11_14_GB_TAFs_Glyco3_CTLdirect
RPLP2	5_QLEET[+947.32303]QHDK	HexNAc(1)Hex(1)NeuAc(2)	2019_11_14_GB_TAFs_Glyco2_Direct24hr
RPRD2	5_QLEET[+947.32303]QHDK	HexNAc(1)Hex(1)NeuAc(2)	2019_11_14_GB_TAFs_Glyco2_Direct24hr
RTRAF	5_RLHS[+365.13220]T[+365.13220]HEELC[+57.02146]TWLDK	HexNAc(1)Hex(1)	2019_11_14_GB_TAFs_Glyco4_Direct24hr
SACS	5_S[+1312.45523]GPLT[+1021.35981]GWR	HexNAc(2)Hex(2)NeuAc(1)	2019_11_14_GB_TAFs_Glyco5_CTLdirect
SACS	5_S[+1312.45523]GPLT[+1021.35981]GWR	HexNAc(2)Hex(2)NeuAc(1)	2019_11_14_GB_TAFs_Glyco6_Direct24hr
SAP30BP	5_S[+1312.45523]GPLT[+1021.35981]GWR	HexNAc(2)Hex(2)NeuAc(1)	2019_11_14_GB_TAFs_Glyco5_CTLdirect
SAP30BP	5_S[+1312.45523]GPLT[+1021.35981]GWR	HexNAc(2)Hex(2)NeuAc(1)	2019_11_14_GB_TAFs_Glyco6_Direct24hr
SAP30BP	5_S[+203.07937]LQLT[+947.32303]GFQAYK	HexNAc(1)Hex(1)NeuAc(2)	2019_11_14_GB_TAFs_Glyco1_CTLdirect
SAP30BP	5_SAAET[+1312.45523]VTK	HexNAc(2)Hex(2)NeuAc(2)	2019_11_14_GB_TAFs_Glyco1_CTLdirect
SAP30BP	5_SLAVS[+203.07937]QGGELYEEWLELR	HexNAc(1)	2019_11_14_GB_TAFs_Glyco6_Direct24hr
SAP30BP	5_T[+1021.35981]APQT[+1312.45523]PVLQK	HexNAc(2)Hex(2)NeuAc(2)	2019_11_14_GB_TAFs_Glyco6_Direct24hr
SAP30BP	5_T[+203.07937]LHS[+406.15875]T[+947.32303]FQPNISQGK	HexNAc(1)Hex(1)NeuAc(2)	2019_11_14_GB_TAFs_Glyco4_Direct24hr
SAP30BP	5_T[+568.21157]ALLS[+656.22761]LFGIPLWYHSQSPR	HexNAc(1)Hex(1)NeuAc(1)	2019_11_14_GB_TAFs_Glyco1_CTLdirect
SART1	5_TEPAT[+656.22761]DLGR	HexNAc(1)Hex(1)NeuAc(1)	2019_11_14_GB_TAFs_Glyco2_Direct24hr
SART1	5_TEPAT[+656.22761]DLGR	HexNAc(1)Hex(1)NeuAc(1)	2019_11_14_GB_TAFs_Glyco4_Direct24hr
SCARB2	5_TEPAT[+656.22761]DLGR	HexNAc(1)Hex(1)NeuAc(1)	2019_11_14_GB_TAFs_Glyco2_Direct24hr
SCRN1	5_TEPAT[+656.22761]DLGR	HexNAc(1)Hex(1)NeuAc(1)	2019_11_14_GB_TAFs_Glyco4_Direct24hr
SCRN1	5_TLATT[+1021.35981]LAPR	HexNAc(2)Hex(2)NeuAc(1)	2019_11_14_GB_TAFs_Glyco4_Direct24hr
SEC24A	5_TLATT[+1021.35981]LAPR	HexNAc(2)Hex(2)NeuAc(1)	2019_11_14_GB_TAFs_Glyco4_Direct24hr
SEC24A	5_TM[+15.99492]AVT[+203.07937]PGTTTLPATVK	HexNAc(1)	2019_11_14_GB_TAFs_Glyco2_Direct24hr
SEC24A	5_TM[+15.99492]AVT[+203.07937]PGTTTLPATVK	HexNAc(1)	2019_11_14_GB_TAFs_Glyco5_CTLdirect
SEC24B	5_TQLQS[+203.07937]FSQYIENR	HexNAc(1)	2019_11_14_GB_TAFs_Glyco2_Direct24hr
SEC24B	5_TQLT[+568.21157]S[+947.32303]MLMM[+15.99492]NLESR	HexNAc(1)Hex(1)NeuAc(2)	2019_11_14_GB_TAFs_Glyco6_Direct24hr
SEC24B	5_TVLVS[+406.15875]S[+365.13220]GLR	HexNAc(2)	2019_11_14_GB_TAFs_Glyco6_Direct24hr
SEC24B	5_VESQS[+203.07937]S[+1238.41845]FGT[+568.21157]LR	HexNAc(1)	2019_11_14_GB_TAFs_Glyco6_Direct24hr
SEC24B	5_VGAFT[+1312.45523]MVC[+57.02146]K	HexNAc(2)Hex(2)NeuAc(2)	2019_11_14_GB_TAFs_Glyco5_CTLdirect
SEC24B	5_VKS[+406.15875]IS[+406.15875]MTTFTQQEIEFLQK	HexNAc(2)	2019_11_14_GB_TAFs_Glyco4_Direct24hr
SEC24B	5_VLGAT[+1312.45523]SFR	HexNAc(2)Hex(2)NeuAc(2)	2019_11_14_GB_TAFs_Glyco2_Direct24hr
SEC24B	5_VNLPT[+203.07937]TVSNFNN[+0.98402]PSPSVVTAT[+203.07937]TSVHESNK	HexNAc(1)	2019_11_14_GB_TAFs_Glyco4_Direct24hr
SF3A1	5_VNLPT[+203.07937]TVSNFNN[+0.98402]PSPSVVTAT[+203.07937]TSVHESNK	HexNAc(1)	2019_11_14_GB_TAFs_Glyco4_Direct24hr
SF3A1	5_VNLPT[+203.07937]TVSNFNNPSPSVVTATT[+406.15875]SVHESNK	HexNAc(1)	2019_11_14_GB_TAFs_Glyco6_Direct24hr
SF3A1	5_VNLPT[+203.07937]TVSNFNNPSPSVVTATTS[+406.15875]VHESN[+0.98402]K	HexNAc(1)	2019_11_14_GB_TAFs_Glyco1_CTLdirect
SF3A1	5_VNLPT[+203.07937]TVSNFNNPSPSVVTATTS[+406.15875]VHESNK	HexNAc(1)	2019_11_14_GB_TAFs_Glyco1_CTLdirect
SGPL1	5_VNLPT[+203.07937]TVSNFNNPSPSVVTATTS[+406.15875]VHESNK	HexNAc(1)	2019_11_14_GB_TAFs_Glyco1_CTLdirect
SGPL1	5_VT[+568.21157]VLT[+1021.35981]LQDK	HexNAc(2)Hex(2)NeuAc(1)	2019_11_14_GB_TAFs_Glyco1_CTLdirect
SH3BP4	5_VT[+568.21157]VLT[+1021.35981]LQDK	HexNAc(2)Hex(2)NeuAc(1)	2019_11_14_GB_TAFs_Glyco1_CTLdirect
SHROOM3	5_VTGDS[+1021.35981]QPK	HexNAc(2)Hex(2)NeuAc(1)	2019_11_14_GB_TAFs_Glyco2_Direct24hr
SKP1	5_VTGDS[+1021.35981]QPK	HexNAc(2)Hex(2)NeuAc(1)	2019_11_14_GB_TAFs_Glyco2_Direct24hr
SKP1	6_AEPM[+15.99492]PS[+203.07937]ASSAPPASSLYSSPVN[+0.98402]SSAPLAEDIDPELAR	HexNAc(1)	2019_11_14_GB_TAFs_Glyco3_CTLdirect
SKP1	6_AEPM[+15.99492]PS[+203.07937]ASSAPPASSLYSSPVN[+0.98402]SSAPLAEDIDPELAR	HexNAc(1)	2019_11_14_GB_TAFs_Glyco6_Direct24hr
SLC12A4	6_AEPM[+15.99492]PS[+203.07937]ASSAPPASSLYSSPVN[+0.98402]SSAPLAEDIDPELAR	HexNAc(1)	2019_11_14_GB_TAFs_Glyco3_CTLdirect
SLC12A4	6_AEPM[+15.99492]PS[+203.07937]ASSAPPASSLYSSPVN[+0.98402]SSAPLAEDIDPELAR	HexNAc(1)	2019_11_14_GB_TAFs_Glyco6_Direct24hr
SLC25A3	6_AEPM[+15.99492]PS[+203.07937]ASSAPPASSLYSSPVNSSAPLAEDIDPELAR	HexNAc(1)	2019_11_14_GB_TAFs_Glyco5_CTLdirect
SLC25A3	6_AEVYPS[+947.32303]AKPM[+15.99492]IK	HexNAc(1)Hex(1)NeuAc(2)	2019_11_14_GB_TAFs_Glyco3_CTLdirect
SLC25A3	6_AEVYPS[+947.32303]AKPM[+15.99492]IK	HexNAc(1)Hex(1)NeuAc(2)	2019_11_14_GB_TAFs_Glyco4_Direct24hr
SLC25A3	6_AEVYPS[+947.32303]AKPM[+15.99492]IK	HexNAc(1)Hex(1)NeuAc(2)	2019_11_14_GB_TAFs_Glyco5_CTLdirect
SLC4A7	6_AEVYPS[+947.32303]AKPM[+15.99492]IK	HexNAc(1)Hex(1)NeuAc(2)	2019_11_14_GB_TAFs_Glyco6_Direct24hr
SLMAP	6_AEVYPS[+947.32303]AKPM[+15.99492]IK	HexNAc(1)Hex(1)NeuAc(2)	2019_11_14_GB_TAFs_Glyco6_Direct24hr
SLMAP	6_AEVYPS[+947.32303]AKPM[+15.99492]IK	HexNAc(1)Hex(1)NeuAc(2)	2019_11_14_GB_TAFs_Glyco3_CTLdirect
SMARCA4	6_AEVYPS[+947.32303]AKPM[+15.99492]IK	HexNAc(1)Hex(1)NeuAc(2)	2019_11_14_GB_TAFs_Glyco4_Direct24hr
SMC2	6_AEVYPS[+947.32303]AKPM[+15.99492]IK	HexNAc(1)Hex(1)NeuAc(2)	2019_11_14_GB_TAFs_Glyco5_CTLdirect
SMCHD1	6_AEVYPS[+947.32303]AKPM[+15.99492]IK	HexNAc(1)Hex(1)NeuAc(2)	2019_11_14_GB_TAFs_Glyco6_Direct24hr
SMPD4	6_AEVYPS[+947.32303]AKPM[+15.99492]IK	HexNAc(1)Hex(1)NeuAc(2)	2019_11_14_GB_TAFs_Glyco1_CTLdirect
SND1	6_AILQN[+0.98402]S[+203.07937]WT[+1021.35981]EVM[+15.99492]DLILK	HexNAc(1)	2019_11_14_GB_TAFs_Glyco4_Direct24hr
SNRNP200	6_ALGIS[+203.07937]S[+947.32303]DSN[+0.98402]K	HexNAc(1)Hex(1)NeuAc(2)	2019_11_14_GB_TAFs_Glyco3_CTLdirect
SNRNP200	6_ALGIS[+203.07937]S[+947.32303]DSN[+0.98402]K	HexNAc(1)Hex(1)NeuAc(2)	2019_11_14_GB_TAFs_Glyco4_Direct24hr
SNTB1	6_ALGIS[+203.07937]S[+947.32303]DSN[+0.98402]K	HexNAc(1)Hex(1)NeuAc(2)	2019_11_14_GB_TAFs_Glyco2_Direct24hr
SNX3	6_ALGIS[+203.07937]S[+947.32303]DSN[+0.98402]K	HexNAc(1)Hex(1)NeuAc(2)	2019_11_14_GB_TAFs_Glyco4_Direct24hr
SNX3	6_ALGIS[+947.32303]S[+203.07937]DSN[+0.98402]K	HexNAc(1)	2019_11_14_GB_TAFs_Glyco2_Direct24hr
SNX3	6_ALGIS[+947.32303]S[+203.07937]DSN[+0.98402]K	HexNAc(1)	2019_11_14_GB_TAFs_Glyco3_CTLdirect
SNX3	6_ANVDIS[+203.07937]APKVDT[+656.22761]NAPDLSLEGPEGK	HexNAc(1)	2019_11_14_GB_TAFs_Glyco6_Direct24hr
SNX3	6_ATATIS[+656.22761]AKPQITNPK	HexNAc(1)Hex(1)NeuAc(1)	2019_11_14_GB_TAFs_Glyco1_CTLdirect
SNX3	6_DAKGIS[+365.13220]QEQM[+15.99492]QEFR	HexNAc(1)Hex(1)	2019_11_14_GB_TAFs_Glyco4_Direct24hr
SON	6_EEAYHS[+947.32303]RS[+568.21157]K	HexNAc(1)Hex(1)NeuAc(2)	2019_11_14_GB_TAFs_Glyco2_Direct24hr
SON	6_EGSDAT[+1312.45523]GDGTK	HexNAc(2)Hex(2)NeuAc(2)	2019_11_14_GB_TAFs_Glyco4_Direct24hr
SON	6_ELQVLS[+365.13220]EQYSQK	HexNAc(1)Hex(1)	2019_11_14_GB_TAFs_Glyco2_Direct24hr
SON	6_ETPTPS[+656.22761]VVNLPFPK	HexNAc(1)Hex(1)NeuAc(1)	2019_11_14_GB_TAFs_Glyco2_Direct24hr
SON	6_GET[+656.22761]LLS[+406.15875]PLVMC[+57.02146]GPHGLK	HexNAc(2)	2019_11_14_GB_TAFs_Glyco5_CTLdirect
SON	6_GQIELT[+406.15875]GKRYPLS[+406.15875]GMGLPTFK	HexNAc(2)	2019_11_14_GB_TAFs_Glyco3_CTLdirect
SON	6_IIPLYS[+203.07937]T[+656.22761]LPPQQQQR	HexNAc(1)	2019_11_14_GB_TAFs_Glyco2_Direct24hr
SON	6_IQLQPT[+365.13220]S[+365.13220]IEKEVFPIM[+15.99492]AK	HexNAc(1)Hex(1)	2019_11_14_GB_TAFs_Glyco2_Direct24hr
SORD	6_IQLQPT[+365.13220]S[+365.13220]IEKEVFPIM[+15.99492]AK	HexNAc(1)Hex(1)	2019_11_14_GB_TAFs_Glyco2_Direct24hr
SORD	6_IS[+365.13220]EQFS[+365.13220]AM[+15.99492]FRR	HexNAc(1)Hex(1)	2019_11_14_GB_TAFs_Glyco4_Direct24hr
SORD	6_ISS[+568.21157]LQT[+365.13220]TEK	HexNAc(1)Hex(1)	2019_11_14_GB_TAFs_Glyco4_Direct24hr
SP140L	6_KESET[+1238.41845]S[+406.15875]R	HexNAc(2)	2019_11_14_GB_TAFs_Glyco4_Direct24hr
SP140L	6_KEVDYS[+1021.35981]DS[+568.21157]LTEK	HexNAc(2)Hex(2)NeuAc(1)	2019_11_14_GB_TAFs_Glyco2_Direct24hr
SRP72	6_KGAFC[+57.02146]T[+1021.35981]AT[+568.21157]LYPGVVFGIC[+57.02146]FVLNC[+57.02146]FIWGK	HexNAc(2)Hex(2)NeuAc(1)	2019_11_14_GB_TAFs_Glyco4_Direct24hr
SRPRA	6_KIQQN[+0.98402]T[+1312.45523]FTR	HexNAc(2)Hex(2)NeuAc(2)	2019_11_14_GB_TAFs_Glyco6_Direct24hr
SSB	6_KIQQN[+0.98402]T[+1312.45523]FTR	HexNAc(2)Hex(2)NeuAc(2)	2019_11_14_GB_TAFs_Glyco6_Direct24hr
SSB	6_KKPN[+0.98402]AT[+656.22761]AEPTPPDR	HexNAc(1)Hex(1)NeuAc(1)	2019_11_14_GB_TAFs_Glyco2_Direct24hr
SSB	6_KLLS[+568.21157]PS[+1312.45523]N[+0.98402]EK	HexNAc(2)Hex(2)NeuAc(2)	2019_11_14_GB_TAFs_Glyco4_Direct24hr
SSB	6_KLS[+406.15875]VPT[+406.15875]SDEEDEVPAPK	HexNAc(2)	2019_11_14_GB_TAFs_Glyco4_Direct24hr
STAT2	6_KLS[+406.15875]VPT[+406.15875]SDEEDEVPAPK	HexNAc(2)	2019_11_14_GB_TAFs_Glyco4_Direct24hr
STAT6	6_KNIFES[+1021.35981]FVDYVAVEQLDGDN[+0.98402]K	HexNAc(2)Hex(2)NeuAc(1)	2019_11_14_GB_TAFs_Glyco6_Direct24hr
STAU1	6_KQVFT[+1238.41845]S[+406.15875]EK	HexNAc(2)	2019_11_14_GB_TAFs_Glyco3_CTLdirect
STAU1	6_LAGTES[+656.22761]PVREEPGEDFPAAR	HexNAc(1)Hex(1)NeuAc(1)	2019_11_14_GB_TAFs_Glyco3_CTLdirect
STT3A	6_LAGTES[+656.22761]PVREEPGEDFPAAR	HexNAc(1)Hex(1)NeuAc(1)	2019_11_14_GB_TAFs_Glyco6_Direct24hr
STT3A	6_LAGTES[+656.22761]PVREEPGEDFPAAR	HexNAc(1)Hex(1)NeuAc(1)	2019_11_14_GB_TAFs_Glyco3_CTLdirect
SUCLG2	6_LAGTES[+656.22761]PVREEPGEDFPAAR	HexNAc(1)Hex(1)NeuAc(1)	2019_11_14_GB_TAFs_Glyco6_Direct24hr
SUGT1	6_LAGTES[+947.32303]PVREEPGEDFPAAR	HexNAc(1)Hex(1)NeuAc(2)	2019_11_14_GB_TAFs_Glyco2_Direct24hr
SUGT1	6_LAGTES[+947.32303]PVREEPGEDFPAAR	HexNAc(1)Hex(1)NeuAc(2)	2019_11_14_GB_TAFs_Glyco3_CTLdirect
SUGT1	6_LAGTES[+947.32303]PVREEPGEDFPAAR	HexNAc(1)Hex(1)NeuAc(2)	2019_11_14_GB_TAFs_Glyco4_Direct24hr
SUGT1	6_LAGTES[+947.32303]PVREEPGEDFPAAR	HexNAc(1)Hex(1)NeuAc(2)	2019_11_14_GB_TAFs_Glyco6_Direct24hr
SUN2	6_LAGTES[+947.32303]PVREEPGEDFPAAR	HexNAc(1)Hex(1)NeuAc(2)	2019_11_14_GB_TAFs_Glyco2_Direct24hr
SUN2	6_LAGTES[+947.32303]PVREEPGEDFPAAR	HexNAc(1)Hex(1)NeuAc(2)	2019_11_14_GB_TAFs_Glyco3_CTLdirect
SUN2	6_LAGTES[+947.32303]PVREEPGEDFPAAR	HexNAc(1)Hex(1)NeuAc(2)	2019_11_14_GB_TAFs_Glyco4_Direct24hr
SUN2	6_LAGTES[+947.32303]PVREEPGEDFPAAR	HexNAc(1)Hex(1)NeuAc(2)	2019_11_14_GB_TAFs_Glyco6_Direct24hr
SUN2	6_LAGTES[+947.32303]PVREEPGEDFPAAR	HexNAc(1)Hex(1)NeuAc(2)	2019_11_14_GB_TAFs_Glyco1_CTLdirect
SUPT5H	6_LAST[+406.15875]IS[+656.22761]IDPK	HexNAc(1)Hex(1)NeuAc(1)	2019_11_14_GB_TAFs_Glyco2_Direct24hr
SUPT5H	6_LLALNS[+1021.35981]LYSPK	HexNAc(2)Hex(2)NeuAc(1)	2019_11_14_GB_TAFs_Glyco2_Direct24hr
SYMPK	6_LLC[+57.02146]T[+1238.41845]AT[+203.07937]K	HexNAc(1)	2019_11_14_GB_TAFs_Glyco4_Direct24hr
SYMPK	6_LLRFQS[+1312.45523]S[+568.21157]HHPTDITSLDQYVER	HexNAc(2)Hex(2)NeuAc(2)	2019_11_14_GB_TAFs_Glyco6_Direct24hr
SYNE1	6_LLTFAS[+1021.35981]QLK	HexNAc(2)Hex(2)NeuAc(1)	2019_11_14_GB_TAFs_Glyco1_CTLdirect
TBK1	6_LLTFAS[+1021.35981]QLK	HexNAc(2)Hex(2)NeuAc(1)	2019_11_14_GB_TAFs_Glyco1_CTLdirect
TBL3	6_LNILDT[+1021.35981]LS[+1021.35981]K	HexNAc(2)Hex(2)NeuAc(1)	2019_11_14_GB_TAFs_Glyco5_CTLdirect
TBL3	6_LNILDT[+1021.35981]LS[+1021.35981]K	HexNAc(2)Hex(2)NeuAc(1)	2019_11_14_GB_TAFs_Glyco6_Direct24hr
TFG	6_LNILDT[+1021.35981]LS[+1021.35981]K	HexNAc(2)Hex(2)NeuAc(1)	2019_11_14_GB_TAFs_Glyco5_CTLdirect
TFG	6_LNILDT[+1021.35981]LS[+1021.35981]K	HexNAc(2)Hex(2)NeuAc(1)	2019_11_14_GB_TAFs_Glyco6_Direct24hr
TFRC	6_LNILDT[+1021.35981]LS[+1021.35981]K	HexNAc(2)Hex(2)NeuAc(1)	2019_11_14_GB_TAFs_Glyco1_CTLdirect
TFRC	6_LNILDT[+1021.35981]LS[+656.22761]K	HexNAc(2)Hex(2)NeuAc(1)	2019_11_14_GB_TAFs_Glyco5_CTLdirect
TFRC	6_LNILDT[+1021.35981]LS[+656.22761]K	HexNAc(2)Hex(2)NeuAc(1)	2019_11_14_GB_TAFs_Glyco6_Direct24hr
TFRC	6_LNILDT[+1312.45523]LSK	HexNAc(2)Hex(2)NeuAc(2)	2019_11_14_GB_TAFs_Glyco2_Direct24hr
TFRC	6_LNILDT[+1312.45523]LSK	HexNAc(2)Hex(2)NeuAc(2)	2019_11_14_GB_TAFs_Glyco3_CTLdirect
TFRC	6_LNILDT[+1312.45523]LSK	HexNAc(2)Hex(2)NeuAc(2)	2019_11_14_GB_TAFs_Glyco5_CTLdirect
TFRC	6_LNILDT[+1312.45523]LSK	HexNAc(2)Hex(2)NeuAc(2)	2019_11_14_GB_TAFs_Glyco6_Direct24hr
TFRC	6_LNILDT[+1312.45523]LSK	HexNAc(2)Hex(2)NeuAc(2)	2019_11_14_GB_TAFs_Glyco1_CTLdirect
TFRC	6_LPPGFS[+568.21157]AS[+406.15875]STVEK	HexNAc(2)Hex(1)	2019_11_14_GB_TAFs_Glyco3_CTLdirect
TFRC	6_LQLLLS[+947.32303]SEQFIT[+947.32303]GLIR	HexNAc(1)Hex(1)NeuAc(2)	2019_11_14_GB_TAFs_Glyco5_CTLdirect
TFRC	6_LS[+365.13220]QILT[+406.15875]DFPK	HexNAc(2)	2019_11_14_GB_TAFs_Glyco4_Direct24hr
TFRC	6_LT[+1312.45523]KLQS[+1312.45523]VQALTEIQEFISFIS[+1021.35981]K	HexNAc(2)Hex(2)NeuAc(2)	2019_11_14_GB_TAFs_Glyco2_Direct24hr
TFRC	6_LVTPVT[+203.07937]VSAVKPAVTTLVVK	HexNAc(1)	2019_11_14_GB_TAFs_Glyco2_Direct24hr
TFRC	6_LVTPVT[+203.07937]VSAVKPAVTTLVVK	HexNAc(1)	2019_11_14_GB_TAFs_Glyco3_CTLdirect
TFRC	6_LVTPVT[+203.07937]VSAVKPAVTTLVVK	HexNAc(1)	2019_11_14_GB_TAFs_Glyco4_Direct24hr
TFRC	6_LVTPVT[+203.07937]VSAVKPAVTTLVVK	HexNAc(1)	2019_11_14_GB_TAFs_Glyco5_CTLdirect
TGOLN2	6_LVTPVT[+203.07937]VSAVKPAVTTLVVK	HexNAc(1)	2019_11_14_GB_TAFs_Glyco5_CTLdirect
TGOLN2	6_LVTPVT[+203.07937]VSAVKPAVTTLVVK	HexNAc(1)	2019_11_14_GB_TAFs_Glyco2_Direct24hr
TGOLN2	6_LVTPVT[+203.07937]VSAVKPAVTTLVVK	HexNAc(1)	2019_11_14_GB_TAFs_Glyco3_CTLdirect
TJP1	6_LVTPVT[+203.07937]VSAVKPAVTTLVVK	HexNAc(1)	2019_11_14_GB_TAFs_Glyco3_CTLdirect
TJP1	6_LVTPVT[+203.07937]VSAVKPAVTTLVVK	HexNAc(1)	2019_11_14_GB_TAFs_Glyco4_Direct24hr
TKFC	6_LVTPVT[+203.07937]VSAVKPAVTTLVVK	HexNAc(1)	2019_11_14_GB_TAFs_Glyco4_Direct24hr
TKFC	6_LVTPVT[+203.07937]VSAVKPAVTTLVVK	HexNAc(1)	2019_11_14_GB_TAFs_Glyco5_CTLdirect
TM9SF4	6_LVTPVT[+203.07937]VSAVKPAVTTLVVK	HexNAc(1)	2019_11_14_GB_TAFs_Glyco5_CTLdirect
TM9SF4	6_LVTPVT[+203.07937]VSAVKPAVTTLVVK	HexNAc(1)	2019_11_14_GB_TAFs_Glyco1_CTLdirect
TM9SF4	6_MPIEDS[+1312.45523]S[+568.21157]PEK	HexNAc(2)Hex(2)NeuAc(2)	2019_11_14_GB_TAFs_Glyco4_Direct24hr
TMEM165	6_MPIEDS[+1312.45523]S[+568.21157]PEK	HexNAc(2)Hex(2)NeuAc(2)	2019_11_14_GB_TAFs_Glyco4_Direct24hr
TMEM165	6_NM[+15.99492]VEDS[+568.21157]K	HexNAc(2)Hex(1)	2019_11_14_GB_TAFs_Glyco2_Direct24hr
TMEM165	6_PALLHS[+656.22761]T[+406.15875]FFPALQGAQT[+406.15875]K	HexNAc(1)Hex(1)NeuAc(1)	2019_11_14_GB_TAFs_Glyco4_Direct24hr
TMEM165	6_PAQLGT[+203.07937]QRS[+406.15875]QEADVQDWEFR	HexNAc(1)	2019_11_14_GB_TAFs_Glyco4_Direct24hr
TMEM165	6_PDVPC[+57.02146]S[+406.15875]LYMK	HexNAc(2)	2019_11_14_GB_TAFs_Glyco4_Direct24hr
TMEM165	6_QDIEDS[+947.32303]VSR	HexNAc(1)Hex(1)NeuAc(2)	2019_11_14_GB_TAFs_Glyco3_CTLdirect
TMEM165	6_QILLYS[+656.22761]AT[+203.07937]FPLSVQK	HexNAc(1)Hex(1)NeuAc(1)	2019_11_14_GB_TAFs_Glyco1_CTLdirect
TMEM165	6_SAVLIS[+1312.45523]S[+1021.35981]K	HexNAc(2)Hex(2)NeuAc(2)	2019_11_14_GB_TAFs_Glyco4_Direct24hr
TMEM165	6_SEALPT[+203.07937]DLPAPSAPDLTEPK	HexNAc(1)	2019_11_14_GB_TAFs_Glyco2_Direct24hr
TMEM165	6_SEALPT[+365.13220]DLPAPSAPDLTEPK	HexNAc(1)Hex(1)	2019_11_14_GB_TAFs_Glyco3_CTLdirect
TMEM165	6_SEALPT[+365.13220]DLPAPSAPDLTEPK	HexNAc(1)Hex(1)	2019_11_14_GB_TAFs_Glyco5_CTLdirect
TMEM165	6_SIQLPT[+568.21157]T[+568.21157]VR	HexNAc(2)Hex(1)	2019_11_14_GB_TAFs_Glyco6_Direct24hr
TMEM165	6_SIQLPT[+568.21157]T[+568.21157]VR	HexNAc(2)Hex(1)	2019_11_14_GB_TAFs_Glyco1_CTLdirect
TMTC3	6_SIQLPT[+568.21157]T[+568.21157]VR	HexNAc(2)Hex(1)	2019_11_14_GB_TAFs_Glyco1_CTLdirect
TMTC3	6_SPAVAT[+203.07937]STAAPPPPSSPLPSK	HexNAc(1)	2019_11_14_GB_TAFs_Glyco2_Direct24hr
TNKS1BP1	6_SPAVAT[+203.07937]STAAPPPPSSPLPSK	HexNAc(1)	2019_11_14_GB_TAFs_Glyco6_Direct24hr
TNKS1BP1	6_SRSHTS[+947.32303]EGAHLDITPNSGAAGNSAGPK	HexNAc(1)Hex(1)NeuAc(2)	2019_11_14_GB_TAFs_Glyco4_Direct24hr
TNS1	6_SSPVVS[+203.07937]TVLSGSSGSSSTR	HexNAc(1)	2019_11_14_GB_TAFs_Glyco6_Direct24hr
TOP2A	6_SSPVVS[+203.07937]TVLSGSSGSSSTR	HexNAc(1)	2019_11_14_GB_TAFs_Glyco6_Direct24hr
TOP2A	6_TETGAT[+947.32303]ETVTPSEAPVLAAEPEADKGTVLALTENNFDDTIAEGITFIK	HexNAc(1)Hex(1)NeuAc(2)	2019_11_14_GB_TAFs_Glyco3_CTLdirect
TPM3	6_TETGAT[+947.32303]ETVTPSEAPVLAAEPEADKGTVLALTENNFDDTIAEGITFIK	HexNAc(1)Hex(1)NeuAc(2)	2019_11_14_GB_TAFs_Glyco5_CTLdirect
TPM3	6_TETGAT[+947.32303]ETVTPSEAPVLAAEPEADKGTVLALTENNFDDTIAEGITFIK	HexNAc(1)Hex(1)NeuAc(2)	2019_11_14_GB_TAFs_Glyco3_CTLdirect
TPM3	6_TGGLYS[+203.07937]C[+57.02146]DITAR	HexNAc(1)	2019_11_14_GB_TAFs_Glyco6_Direct24hr
TPM3	6_TVLVS[+406.15875]S[+365.13220]GLR	HexNAc(1)Hex(1)	2019_11_14_GB_TAFs_Glyco6_Direct24hr
TPR	6_VAFT[+1021.35981]GS[+406.15875]T[+947.32303]EVGHLIQK	HexNAc(2)	2019_11_14_GB_TAFs_Glyco2_Direct24hr
TPR	6_VESQS[+203.07937]S[+1238.41845]FGT[+568.21157]LR	HexNAc(1)Hex(1)NeuAc(3)	2019_11_14_GB_TAFs_Glyco6_Direct24hr
TPR	6_VLS[+568.21157]VET[+568.21157]PLS[+568.21157]IQAHPNKELAEK	HexNAc(2)Hex(1)	2019_11_14_GB_TAFs_Glyco6_Direct24hr
TRIO	6_VT[+947.32303]C[+57.02146]LES[+203.07937]GLR	HexNAc(1)	2019_11_14_GB_TAFs_Glyco2_Direct24hr
TRIO	6_YAVDYS[+365.13220]WYVDTILNLIR	HexNAc(1)Hex(1)	2019_11_14_GB_TAFs_Glyco6_Direct24hr
TRIO	6_YLYADS[+406.15875]S[+406.15875]K	HexNAc(2)	2019_11_14_GB_TAFs_Glyco2_Direct24hr
TRIO	6_YRPVST[+203.07937]S[+203.07937]SSTTPSSSLSTM[+15.99492]SSSLYASSQLNRPNSLVGITSAYSR	HexNAc(1)	2019_11_14_GB_TAFs_Glyco1_CTLdirect
TRIO	6_YRPVST[+203.07937]S[+203.07937]SSTTPSSSLSTM[+15.99492]SSSLYASSQLNRPNSLVGITSAYSR	HexNAc(1)	2019_11_14_GB_TAFs_Glyco2_Direct24hr
TRIO	6_YRPVST[+406.15875]SSSTTPSSSLSTM[+15.99492]SSSLYASSQLNRPNSLVGITSAYSR	HexNAc(2)	2019_11_14_GB_TAFs_Glyco2_Direct24hr
TRIO	7_ADGQLVS[+1238.41845]S[+568.21157]EK	HexNAc(1)Hex(1)NeuAc(3)	2019_11_14_GB_TAFs_Glyco4_Direct24hr
TRIO	7_AVIDFKS[+365.13220]NGHIYDNR	HexNAc(1)Hex(1)	2019_11_14_GB_TAFs_Glyco6_Direct24hr
TRIO	7_AVQGFFT[+406.15875]SNNATR	HexNAc(2)	2019_11_14_GB_TAFs_Glyco2_Direct24hr
TRIOBP	7_DLDLVQT[+656.22761]WNLEK	HexNAc(1)Hex(1)NeuAc(1)	2019_11_14_GB_TAFs_Glyco1_CTLdirect
TRMT10C	7_DVFS[+365.13220]VET[+365.13220]PK	HexNAc(1)Hex(1)	2019_11_14_GB_TAFs_Glyco4_Direct24hr
TRMT10C	7_GAET[+656.22761]LVT[+1312.45523]R	HexNAc(2)Hex(2)NeuAc(2)	2019_11_14_GB_TAFs_Glyco2_Direct24hr
TRMT10C	7_GIET[+568.21157]S[+568.21157]GT[+568.21157]FAVK	HexNAc(2)Hex(1)	2019_11_14_GB_TAFs_Glyco6_Direct24hr
TTC37	7_GILLT[+1312.45523]GS[+406.15875]K	HexNAc(2)	2019_11_14_GB_TAFs_Glyco5_CTLdirect
TTC37	7_GLPFGC[+57.02146]S[+947.32303]K	HexNAc(1)Hex(1)NeuAc(2)	2019_11_14_GB_TAFs_Glyco2_Direct24hr
TTC37	7_GQLEQIT[+203.07937]GKGAS[+406.15875]GT[+406.15875]FQLK	HexNAc(1)	2019_11_14_GB_TAFs_Glyco5_CTLdirect
TTLL12	7_IGEVWAS[+1238.41845]K	HexNAc(1)Hex(1)NeuAc(3)	2019_11_14_GB_TAFs_Glyco5_CTLdirect
TUBB6	7_IGSSAPT[+406.15875]TTAANTSLM[+15.99492]GIK	HexNAc(2)	2019_11_14_GB_TAFs_Glyco2_Direct24hr
TUBB6	7_IIPLYS[+203.07937]T[+656.22761]LPPQQQQR	HexNAc(1)Hex(1)NeuAc(1)	2019_11_14_GB_TAFs_Glyco2_Direct24hr
TXNDC5	7_IIPLYS[+203.07937]T[+656.22761]LPPQQQQR	HexNAc(1)Hex(1)NeuAc(1)	2019_11_14_GB_TAFs_Glyco2_Direct24hr
TXNDC5	7_IQLQPT[+365.13220]S[+365.13220]IEKEVFPIM[+15.99492]AK	HexNAc(1)Hex(1)	2019_11_14_GB_TAFs_Glyco2_Direct24hr
TXNDC5	7_ISEGLPT[+365.13220]PT[+406.15875]K	HexNAc(1)Hex(1)	2019_11_14_GB_TAFs_Glyco4_Direct24hr
TXNDC5	7_ISLPITS[+203.07937]SSLPTFNFSSPEITTSSPSPINSSQALTNK	HexNAc(1)	2019_11_14_GB_TAFs_Glyco1_CTLdirect
TXNDC5	7_KDLYANT[+203.07937]VLS[+406.15875]GGS[+406.15875]TMYPGIADR	HexNAc(1)	2019_11_14_GB_TAFs_Glyco1_CTLdirect
TXNDC5	7_KLNLDGS[+947.32303]NYTLLK	HexNAc(1)Hex(1)NeuAc(2)	2019_11_14_GB_TAFs_Glyco5_CTLdirect
TXNDC5	7_KLQS[+406.15875]EDS[+406.15875]AK	HexNAc(2)	2019_11_14_GB_TAFs_Glyco2_Direct24hr
TXNDC5	7_KPGPPLS[+568.21157]PEIR	HexNAc(2)Hex(1)	2019_11_14_GB_TAFs_Glyco2_Direct24hr
TXNDC5	7_LFQQIYS[+568.21157]DGS[+1312.45523]DEVK	HexNAc(2)Hex(1)	2019_11_14_GB_TAFs_Glyco2_Direct24hr
TXNDC5	7_LGDVS[+365.13220]PT[+365.13220]QIDVSQFGSFK	HexNAc(1)Hex(1)	2019_11_14_GB_TAFs_Glyco6_Direct24hr
TXNDC5	7_LIIGFIS[+365.13220]K	HexNAc(1)Hex(1)	2019_11_14_GB_TAFs_Glyco4_Direct24hr
TXNDC5	7_LLAES[+365.13220]VT[+406.15875]EVEIFGK	HexNAc(2)	2019_11_14_GB_TAFs_Glyco2_Direct24hr
TXNDC5	7_LLDLYES[+1312.45523]VDK	HexNAc(2)Hex(2)NeuAc(2)	2019_11_14_GB_TAFs_Glyco3_CTLdirect
TXNDC5	7_LLDLYES[+1312.45523]VDK	HexNAc(2)Hex(2)NeuAc(2)	2019_11_14_GB_TAFs_Glyco1_CTLdirect
TXNDC5	7_LLQAGFS[+947.32303]ELKETEKWNIKPESKYFM[+15.99492]TR	HexNAc(1)Hex(1)NeuAc(2)	2019_11_14_GB_TAFs_Glyco4_Direct24hr
TXNDC5	7_LLRFQS[+1312.45523]S[+568.21157]HHPTDITSLDQYVER	HexNAc(2)Hex(1)	2019_11_14_GB_TAFs_Glyco6_Direct24hr
TXNDC5	7_LMSSNST[+365.13220]DLPLNIEC[+57.02146]FMNDK	HexNAc(1)Hex(1)	2019_11_14_GB_TAFs_Glyco4_Direct24hr
TXNDC5	7_MPIEDS[+1312.45523]S[+568.21157]PEK	HexNAc(2)Hex(1)	2019_11_14_GB_TAFs_Glyco4_Direct24hr
TXNDC5	7_NLC[+57.02146]YANT[+947.32303]INWKK	HexNAc(1)Hex(1)NeuAc(2)	2019_11_14_GB_TAFs_Glyco3_CTLdirect
TXNDC5	7_PALLHS[+656.22761]T[+406.15875]FFPALQGAQT[+406.15875]K	HexNAc(2)	2019_11_14_GB_TAFs_Glyco4_Direct24hr
TXNDC5	7_PENILVT[+1238.41845]SGGTVKLADFGLAR	HexNAc(1)Hex(1)NeuAc(3)	2019_11_14_GB_TAFs_Glyco2_Direct24hr
TXNDC5	7_PGGS[+947.32303]GLT[+656.22761]GAK	HexNAc(1)Hex(1)NeuAc(1)	2019_11_14_GB_TAFs_Glyco2_Direct24hr
TXNDC5	7_PIS[+406.15875]VEGS[+1312.45523]S[+406.15875]K	HexNAc(2)Hex(2)NeuAc(2)	2019_11_14_GB_TAFs_Glyco4_Direct24hr
TXNDC5	7_PLIWIES[+1238.41845]VIEK	HexNAc(1)Hex(1)NeuAc(3)	2019_11_14_GB_TAFs_Glyco4_Direct24hr
TXNDC5	7_QS[+203.07937]VT[+1238.41845]IKT[+1238.41845]MLEDLGMDDEGDDDPVPLPNVNAAILK	HexNAc(1)Hex(1)NeuAc(3)	2019_11_14_GB_TAFs_Glyco6_Direct24hr
TXNDC5	7_S[+365.13220]FPDFPT[+365.13220]PGVVFR	HexNAc(1)Hex(1)	2019_11_14_GB_TAFs_Glyco4_Direct24hr
TXNDC5	7_S[+365.13220]LAPDRS[+365.13220]DDEHDPLDNTSR	HexNAc(1)Hex(1)	2019_11_14_GB_TAFs_Glyco1_CTLdirect
TXNDC5	7_SAVLIS[+1312.45523]S[+1021.35981]K	HexNAc(2)Hex(2)NeuAc(1)	2019_11_14_GB_TAFs_Glyco4_Direct24hr
TXNDC5	7_SEFIDLS[+406.15875]EK	HexNAc(2)	2019_11_14_GB_TAFs_Glyco2_Direct24hr
TXNDC5	7_SHPELQT[+947.32303]PKDSTGK	HexNAc(1)Hex(1)NeuAc(2)	2019_11_14_GB_TAFs_Glyco2_Direct24hr
TXNDC5	7_SHPELQT[+947.32303]PKDSTGK	HexNAc(1)Hex(1)NeuAc(2)	2019_11_14_GB_TAFs_Glyco3_CTLdirect
TXNDC5	7_SIQLPT[+568.21157]T[+568.21157]VR	HexNAc(2)Hex(1)	2019_11_14_GB_TAFs_Glyco6_Direct24hr
TXNDC5	7_SIQLPT[+568.21157]T[+568.21157]VR	HexNAc(2)Hex(1)	2019_11_14_GB_TAFs_Glyco1_CTLdirect
TXNDC5	7_SPAVATS[+203.07937]TAAPPPPSSPLPSK	HexNAc(1)	2019_11_14_GB_TAFs_Glyco4_Direct24hr
TXNDC5	7_SPAVATS[+203.07937]TAAPPPPSSPLPSK	HexNAc(1)	2019_11_14_GB_TAFs_Glyco6_Direct24hr
TXNDC5	7_SPAVATS[+203.07937]TAAPPPPSSPLPSK	HexNAc(1)	2019_11_14_GB_TAFs_Glyco2_Direct24hr
TXNDC5	7_SPVT[+406.15875]FLS[+568.21157]DLR	HexNAc(2)Hex(1)	2019_11_14_GB_TAFs_Glyco1_CTLdirect
TXNDC5	7_VAFT[+1021.35981]GS[+406.15875]T[+947.32303]EVGHLIQK	HexNAc(1)Hex(1)NeuAc(2)	2019_11_14_GB_TAFs_Glyco2_Direct24hr
TXNDC5	7_VM[+15.99492]S[+568.21157]VVQT[+568.21157]K	HexNAc(2)Hex(1)	2019_11_14_GB_TAFs_Glyco4_Direct24hr
TXNDC5	7_VSAPEVS[+656.22761]VGHK	HexNAc(1)Hex(1)NeuAc(1)	2019_11_14_GB_TAFs_Glyco2_Direct24hr
TXNDC5	7_VT[+203.07937]WDGHS[+947.32303]GS[+406.15875]MAR	HexNAc(1)Hex(1)NeuAc(2)	2019_11_14_GB_TAFs_Glyco2_Direct24hr
TXNDC5	7_VYFMKQT[+1021.35981]IGNS[+1021.35981]C[+57.02146]GT[+365.13220]IGLIHAVANNQDK	HexNAc(2)Hex(2)NeuAc(1)	2019_11_14_GB_TAFs_Glyco2_Direct24hr
TXNDC5	7_YLYADS[+406.15875]S[+406.15875]K	HexNAc(2)	2019_11_14_GB_TAFs_Glyco2_Direct24hr
TXNDC5	7_YRPVST[+203.07937]S[+203.07937]SSTTPSSSLSTM[+15.99492]SSSLYASSQLNRPNSLVGITSAYSR	HexNAc(1)	2019_11_14_GB_TAFs_Glyco1_CTLdirect
TXNDC5	7_YRPVST[+203.07937]S[+203.07937]SSTTPSSSLSTM[+15.99492]SSSLYASSQLNRPNSLVGITSAYSR	HexNAc(1)	2019_11_14_GB_TAFs_Glyco2_Direct24hr
TXNDC5	8_ADGQLVS[+1238.41845]S[+568.21157]EK	HexNAc(2)Hex(1)	2019_11_14_GB_TAFs_Glyco4_Direct24hr
TXNDC5	8_AEPM[+15.99492]PSAS[+203.07937]SAPPASSLYSSPVN[+0.98402]SSAPLAEDIDPELAR	HexNAc(1)	2019_11_14_GB_TAFs_Glyco1_CTLdirect
TXNDC5	8_AILQN[+0.98402]S[+203.07937]WT[+1021.35981]EVM[+15.99492]DLILK	HexNAc(2)Hex(2)NeuAc(1)	2019_11_14_GB_TAFs_Glyco4_Direct24hr
TXNDC5	8_APLAGQVS[+406.15875]TM[+15.99492]VTTSTTTTVAK	HexNAc(2)	2019_11_14_GB_TAFs_Glyco3_CTLdirect
TXNDC5	8_AQFEGIVT[+203.07937]DLIRRTIAPC[+57.02146]QK	HexNAc(1)	2019_11_14_GB_TAFs_Glyco4_Direct24hr
TXNDC5	8_DDQEAILT[+406.15875]QFC[+57.02146]VQTPQPPPK	HexNAc(2)	2019_11_14_GB_TAFs_Glyco5_CTLdirect
TXNDC5	8_EEAYHS[+947.32303]RS[+568.21157]K	HexNAc(2)Hex(1)	2019_11_14_GB_TAFs_Glyco2_Direct24hr
TXNDC5	8_EGVT[+203.07937]PWAS[+656.22761]FK	HexNAc(1)Hex(1)NeuAc(1)	2019_11_14_GB_TAFs_Glyco4_Direct24hr
TXNDC5	8_EHALLAYT[+656.22761]LGVK	HexNAc(1)Hex(1)NeuAc(1)	2019_11_14_GB_TAFs_Glyco5_CTLdirect
TXNDC5	8_EHALLAYT[+656.22761]LGVK	HexNAc(1)Hex(1)NeuAc(1)	2019_11_14_GB_TAFs_Glyco1_CTLdirect
TXNDC5	8_FDN[+0.98402]PAAVS[+203.07937]PT[+1021.35981]PT[+406.15875]R	HexNAc(1)	2019_11_14_GB_TAFs_Glyco4_Direct24hr
TXNDC5	8_FGVSSSSS[+203.07937]GPSQTLTSTGNFK	HexNAc(1)	2019_11_14_GB_TAFs_Glyco5_CTLdirect
TXNDC5	8_GAIVFNAT[+1312.45523]S[+656.22761]EFC[+57.02146]R	HexNAc(2)Hex(2)NeuAc(2)	2019_11_14_GB_TAFs_Glyco1_CTLdirect
TXNDC5	8_GAPN[+0.98402]KEET[+203.07937]PATESPDTGLYYHR	HexNAc(1)	2019_11_14_GB_TAFs_Glyco4_Direct24hr
TXNDC5	8_GAPNKEET[+203.07937]PAT[+203.07937]ESPDTGLYYHR	HexNAc(1)	2019_11_14_GB_TAFs_Glyco2_Direct24hr
TXNDC5	8_GAPNKEET[+203.07937]PAT[+203.07937]ESPDTGLYYHR	HexNAc(1)	2019_11_14_GB_TAFs_Glyco5_CTLdirect
TXNDC5	8_GAPNKEET[+203.07937]PAT[+203.07937]ESPDTGLYYHR	HexNAc(1)	2019_11_14_GB_TAFs_Glyco6_Direct24hr
TXNDC5	8_GLVQALQT[+1312.45523]KVT[+1238.41845]QQGLK	HexNAc(2)Hex(2)NeuAc(2)	2019_11_14_GB_TAFs_Glyco2_Direct24hr
TXNDC5	8_GVFRYC[+57.02146]NT[+568.21157]WPVAIS[+1238.41845]MLASK	HexNAc(2)Hex(1)	2019_11_14_GB_TAFs_Glyco2_Direct24hr
TXNDC5	8_IGSSAPTT[+406.15875]TAANTSLM[+15.99492]GIK	HexNAc(2)	2019_11_14_GB_TAFs_Glyco5_CTLdirect
TXNDC5	8_IGSSAPTT[+406.15875]TAANTSLM[+15.99492]GIK	HexNAc(2)	2019_11_14_GB_TAFs_Glyco2_Direct24hr
TXNDC5	8_ILVQERLT[+947.32303]QDAVAK	HexNAc(1)Hex(1)NeuAc(2)	2019_11_14_GB_TAFs_Glyco5_CTLdirect
TXNDC5	8_ISLPITSS[+203.07937]SLPTFNFSSPEITTSSPSPINSSQALTNK	HexNAc(1)	2019_11_14_GB_TAFs_Glyco1_CTLdirect
TXNDC5	8_KEEVPEFT[+1312.45523]K	HexNAc(2)Hex(2)NeuAc(2)	2019_11_14_GB_TAFs_Glyco4_Direct24hr
TXNDC5	8_KEVDYS[+1021.35981]DS[+568.21157]LTEK	HexNAc(2)Hex(1)	2019_11_14_GB_TAFs_Glyco2_Direct24hr
TXNDC5	8_KFQILDFT[+568.21157]S[+406.15875]PK	HexNAc(2)Hex(1)	2019_11_14_GB_TAFs_Glyco2_Direct24hr
TXNDC5	8_KGAFC[+57.02146]T[+1021.35981]AT[+568.21157]LYPGVVFGIC[+57.02146]FVLNC[+57.02146]FIWGK	HexNAc(2)Hex(1)	2019_11_14_GB_TAFs_Glyco4_Direct24hr
TXNDC5	8_KLES[+406.15875]YFQS[+947.32303]S[+406.15875]K	HexNAc(1)Hex(1)NeuAc(2)	2019_11_14_GB_TAFs_Glyco2_Direct24hr
TXNDC5	8_KPHTSLTT[+203.07937]AASPVSTSAGGIM[+15.99492]TAPAIDIFSTPSSSNSTSK	HexNAc(1)	2019_11_14_GB_TAFs_Glyco2_Direct24hr
TXNDC5	8_KPHTSLTT[+203.07937]AASPVSTSAGGIM[+15.99492]TAPAIDIFSTPSSSNSTSK	HexNAc(1)	2019_11_14_GB_TAFs_Glyco4_Direct24hr
TXNDC5	8_KPHTSLTT[+203.07937]AASPVSTSAGGIM[+15.99492]TAPAIDIFSTPSSSNSTSK	HexNAc(1)	2019_11_14_GB_TAFs_Glyco1_CTLdirect
TXNDC5	8_LLSDFLDS[+406.15875]EVS[+406.15875]ELR	HexNAc(2)	2019_11_14_GB_TAFs_Glyco5_CTLdirect
TXNDC5	8_LNILDT[+1021.35981]LS[+1021.35981]K	HexNAc(2)Hex(2)NeuAc(1)	2019_11_14_GB_TAFs_Glyco5_CTLdirect
TXNDC5	8_LNILDT[+1021.35981]LS[+1021.35981]K	HexNAc(2)Hex(2)NeuAc(1)	2019_11_14_GB_TAFs_Glyco6_Direct24hr
TXNDC5	8_LNILDT[+1021.35981]LS[+1021.35981]K	HexNAc(2)Hex(2)NeuAc(1)	2019_11_14_GB_TAFs_Glyco1_CTLdirect
TXNDC5	8_LNILDT[+1021.35981]LS[+656.22761]K	HexNAc(1)Hex(1)NeuAc(1)	2019_11_14_GB_TAFs_Glyco5_CTLdirect
TXNDC5	8_LNILDT[+1021.35981]LS[+656.22761]K	HexNAc(1)Hex(1)NeuAc(1)	2019_11_14_GB_TAFs_Glyco6_Direct24hr
TXNDC5	8_LPPGFS[+568.21157]AS[+406.15875]STVEK	HexNAc(2)	2019_11_14_GB_TAFs_Glyco3_CTLdirect
TXNDC5	8_LQAYHTQT[+568.21157]T[+568.21157]PLIEYYR	HexNAc(2)Hex(1)	2019_11_14_GB_TAFs_Glyco2_Direct24hr
UBA2	8_LQAYHTQT[+568.21157]T[+568.21157]PLIEYYR	HexNAc(2)Hex(1)	2019_11_14_GB_TAFs_Glyco2_Direct24hr
UBA2	8_LS[+1312.45523]FS[+568.21157]EINT[+1312.45523]R	HexNAc(2)Hex(2)NeuAc(2)	2019_11_14_GB_TAFs_Glyco1_CTLdirect
UBA2	8_LS[+568.21157]FS[+1312.45523]EINT[+1312.45523]R	HexNAc(2)Hex(2)NeuAc(2)	2019_11_14_GB_TAFs_Glyco1_CTLdirect
UBA2	8_LVLEQVVT[+568.21157]S[+365.13220]IAS[+365.13220]VADTAEEK	HexNAc(2)Hex(1)	2019_11_14_GB_TAFs_Glyco4_Direct24hr
UBA3	8_LVLEQVVT[+568.21157]S[+365.13220]IAS[+365.13220]VADTAEEK	HexNAc(2)Hex(1)	2019_11_14_GB_TAFs_Glyco4_Direct24hr
UBA3	8_NPAVWLNT[+656.22761]S[+656.22761]QPLC[+57.02146]K	HexNAc(1)Hex(1)NeuAc(1)	2019_11_14_GB_TAFs_Glyco4_Direct24hr
UBAP2L	8_NPGVWLNT[+656.22761]T[+656.22761]QPLC[+57.02146]K	HexNAc(1)Hex(1)NeuAc(1)	2019_11_14_GB_TAFs_Glyco4_Direct24hr
UBAP2L	8_PGVKLTLS[+656.22761]ALVDGK	HexNAc(1)Hex(1)NeuAc(1)	2019_11_14_GB_TAFs_Glyco2_Direct24hr
UBAP2L	8_PIS[+406.15875]VEGS[+1312.45523]S[+406.15875]K	HexNAc(2)	2019_11_14_GB_TAFs_Glyco4_Direct24hr
UBAP2L	8_QILLYS[+656.22761]AT[+203.07937]FPLSVQK	HexNAc(1)	2019_11_14_GB_TAFs_Glyco1_CTLdirect
UBAP2L	8_SIIMYLTS[+365.13220]LFEVLPQQVTIDAIR	HexNAc(1)Hex(1)	2019_11_14_GB_TAFs_Glyco5_CTLdirect
UBAP2L	8_SLGGDVAS[+568.21157]DGDFLIFEGNR	HexNAc(2)Hex(1)	2019_11_14_GB_TAFs_Glyco4_Direct24hr
UBAP2L	8_TETGATET[+203.07937]VTPSEAPVLAAEPEADKGTVLALTENNFDDTIAEGITFIK	HexNAc(1)	2019_11_14_GB_TAFs_Glyco3_CTLdirect
UBAP2L	8_TETGATET[+203.07937]VTPSEAPVLAAEPEADKGTVLALTENNFDDTIAEGITFIK	HexNAc(1)	2019_11_14_GB_TAFs_Glyco5_CTLdirect
UBQLN2	8_TETGATET[+203.07937]VTPSEAPVLAAEPEADKGTVLALTENNFDDTIAEGITFIK	HexNAc(1)	2019_11_14_GB_TAFs_Glyco3_CTLdirect
UBQLN2	8_TETGATET[+203.07937]VTPSEAPVLAAEPEADKGTVLALTENNFDDTIAEGITFIK	HexNAc(1)	2019_11_14_GB_TAFs_Glyco5_CTLdirect
UBR4	8_TETGATET[+365.13220]VTPSEAPVLAAEPEADKGTVLALTENNFDDTIAEGITFIK	HexNAc(1)Hex(1)	2019_11_14_GB_TAFs_Glyco1_CTLdirect
UCHL1	8_TETGATET[+656.22761]VTPSEAPVLAAEPEADKGTVLALTENNFDDTIAEGITFIK	HexNAc(1)Hex(1)NeuAc(1)	2019_11_14_GB_TAFs_Glyco1_CTLdirect
UCHL1	8_TM[+15.99492]AVTPGT[+203.07937]TTLPATVK	HexNAc(1)	2019_11_14_GB_TAFs_Glyco6_Direct24hr
UCHL1	8_TT[+1312.45523]GIVMDS[+406.15875]GDGVT[+203.07937]HIVPIYEGYALPHAILR	HexNAc(2)	2019_11_14_GB_TAFs_Glyco2_Direct24hr
UCHL1	8_TTVVYPAT[+1238.41845]EK	HexNAc(1)Hex(1)NeuAc(3)	2019_11_14_GB_TAFs_Glyco2_Direct24hr
UFD1	8_VSN[+0.98402]VSAAS[+947.32303]LVPAVPQPEADNLTLR	HexNAc(1)Hex(1)NeuAc(2)	2019_11_14_GB_TAFs_Glyco6_Direct24hr
UFD1	8_VSNVSAAS[+947.32303]LVPAVPQPEADN[+0.98402]LTLR	HexNAc(1)Hex(1)NeuAc(2)	2019_11_14_GB_TAFs_Glyco6_Direct24hr
UGP2	8_VT[+1312.45523]HGC[+57.02146]IVS[+1312.45523]T[+1021.35981]IK	HexNAc(2)Hex(2)NeuAc(2)	2019_11_14_GB_TAFs_Glyco3_CTLdirect
UGP2	8_WDSAIPVT[+406.15875]TIAQPTILTTTATLPAVVTVTTSASGSK	HexNAc(2)	2019_11_14_GB_TAFs_Glyco3_CTLdirect
USP10	8_WDSAIPVT[+406.15875]TIAQPTILTTTATLPAVVTVTTSASGSK	HexNAc(2)	2019_11_14_GB_TAFs_Glyco3_CTLdirect
USP10	9_APLAGQVST[+203.07937]M[+15.99492]VT[+406.15875]TSTTTTVAK	HexNAc(1)	2019_11_14_GB_TAFs_Glyco5_CTLdirect
USP19	9_APLAGQVST[+203.07937]M[+15.99492]VT[+406.15875]TSTTTTVAK	HexNAc(1)	2019_11_14_GB_TAFs_Glyco5_CTLdirect
USP19	9_C[+57.02146]HEEIGPFT[+656.22761]DTR	HexNAc(1)Hex(1)NeuAc(1)	2019_11_14_GB_TAFs_Glyco4_Direct24hr
USP19	9_DLYAN[+0.98402]TVLS[+568.21157]GGT[+406.15875]T[+656.22761]MYPGIADR	HexNAc(2)Hex(1)	2019_11_14_GB_TAFs_Glyco4_Direct24hr
USP19	9_DLYAN[+0.98402]TVLS[+568.21157]GGT[+656.22761]T[+406.15875]MYPGIADR	HexNAc(2)Hex(1)	2019_11_14_GB_TAFs_Glyco4_Direct24hr
USP19	9_EFHHGPDPT[+203.07937]DTAPGEQAQDVASSPPESSFQK	HexNAc(1)	2019_11_14_GB_TAFs_Glyco5_CTLdirect
USP39	9_EFHHGPDPT[+203.07937]DTAPGEQAQDVASSPPESSFQK	HexNAc(1)	2019_11_14_GB_TAFs_Glyco5_CTLdirect
USP7	9_EFHHGPDPT[+203.07937]DTAPGEQAQDVASSPPESSFQK	HexNAc(1)	2019_11_14_GB_TAFs_Glyco5_CTLdirect
USP7	9_EFHHGPDPT[+203.07937]DTAPGEQAQDVASSPPESSFQK	HexNAc(1)	2019_11_14_GB_TAFs_Glyco1_CTLdirect
USP9X	9_EFHHGPDPT[+203.07937]DTAPGEQAQDVASSPPESSFQK	HexNAc(1)	2019_11_14_GB_TAFs_Glyco1_CTLdirect
UTRN	9_FNAHGDANT[+568.21157]IVC[+57.02146]N[+0.98402]S[+365.13220]K	HexNAc(2)Hex(1)	2019_11_14_GB_TAFs_Glyco2_Direct24hr
UTRN	9_FQT[+203.07937]FLINMT[+947.32303]ALLVESLNHR	HexNAc(1)Hex(1)NeuAc(2)	2019_11_14_GB_TAFs_Glyco6_Direct24hr
UTRN	9_GAIVFNAT[+1312.45523]S[+656.22761]EFC[+57.02146]R	HexNAc(1)Hex(1)NeuAc(1)	2019_11_14_GB_TAFs_Glyco1_CTLdirect
UTRN	9_GFPGLPGPS[+656.22761]GEPGK	HexNAc(1)Hex(1)NeuAc(1)	2019_11_14_GB_TAFs_Glyco5_CTLdirect
VDAC2	9_GFPGLPGPS[+656.22761]GEPGK	HexNAc(1)Hex(1)NeuAc(1)	2019_11_14_GB_TAFs_Glyco5_CTLdirect
VPS11	9_GLSPAQADS[+947.32303]QFLENAK	HexNAc(1)Hex(1)NeuAc(2)	2019_11_14_GB_TAFs_Glyco4_Direct24hr
VPS37B	9_GVGNVGC[+57.02146]FT[+947.32303]VVYPR	HexNAc(1)Hex(1)NeuAc(2)	2019_11_14_GB_TAFs_Glyco3_CTLdirect
VPS51	9_IGSSAPTTT[+406.15875]AANTSLM[+15.99492]GIK	HexNAc(2)	2019_11_14_GB_TAFs_Glyco5_CTLdirect
WAPL	9_IGSSAPTTT[+406.15875]AANTSLM[+15.99492]GIK	HexNAc(2)	2019_11_14_GB_TAFs_Glyco5_CTLdirect
WAPL	9_IM[+15.99492]DPN[+0.98402]IVGS[+365.13220]EHYDVAR	HexNAc(1)Hex(1)	2019_11_14_GB_TAFs_Glyco2_Direct24hr
WARS	9_IM[+15.99492]DPN[+0.98402]IVGS[+365.13220]EHYDVAR	HexNAc(1)Hex(1)	2019_11_14_GB_TAFs_Glyco2_Direct24hr
WARS	9_ISEGLPT[+365.13220]PT[+406.15875]K	HexNAc(2)	2019_11_14_GB_TAFs_Glyco4_Direct24hr
WARS	9_IYPLPDDPS[+1021.35981]VPAPPR	HexNAc(2)Hex(2)NeuAc(1)	2019_11_14_GB_TAFs_Glyco5_CTLdirect
WARS	9_KFQILDFT[+568.21157]S[+406.15875]PK	HexNAc(2)	2019_11_14_GB_TAFs_Glyco2_Direct24hr
WARS	9_KLES[+406.15875]YFQS[+947.32303]S[+406.15875]K	HexNAc(2)	2019_11_14_GB_TAFs_Glyco2_Direct24hr
WARS	9_LNIEEFEFS[+365.13220]QSYLFFWDK	HexNAc(1)Hex(1)	2019_11_14_GB_TAFs_Glyco1_CTLdirect
WBP11	9_LNIEEFEFS[+365.13220]QSYLFFWDK	HexNAc(1)Hex(1)	2019_11_14_GB_TAFs_Glyco1_CTLdirect
WBP11	9_LQAYHTQT[+568.21157]T[+568.21157]PLIEYYR	HexNAc(2)Hex(1)	2019_11_14_GB_TAFs_Glyco2_Direct24hr
XPO1	9_LQAYHTQT[+568.21157]T[+568.21157]PLIEYYR	HexNAc(2)Hex(1)	2019_11_14_GB_TAFs_Glyco2_Direct24hr
XPO1	9_LVLEQVVT[+568.21157]S[+365.13220]IAS[+365.13220]VADTAEEK	HexNAc(1)Hex(1)	2019_11_14_GB_TAFs_Glyco4_Direct24hr
XPO1	9_N[+0.98402]ILQLHDLT[+656.22761]TGALLK	HexNAc(1)Hex(1)NeuAc(1)	2019_11_14_GB_TAFs_Glyco2_Direct24hr
XPO1	9_NPAVWLNT[+656.22761]S[+656.22761]QPLC[+57.02146]K	HexNAc(1)Hex(1)NeuAc(1)	2019_11_14_GB_TAFs_Glyco4_Direct24hr
XPO1	9_NPGVWLNT[+656.22761]T[+656.22761]QPLC[+57.02146]K	HexNAc(1)Hex(1)NeuAc(1)	2019_11_14_GB_TAFs_Glyco4_Direct24hr
XPO1	9_PAQLGT[+203.07937]QRS[+406.15875]QEADVQDWEFR	HexNAc(2)	2019_11_14_GB_TAFs_Glyco4_Direct24hr
XPO1	9_PGFTSLPGS[+406.15875]T[+406.15875]M[+15.99492]TPPPSGPNPYAR	HexNAc(2)	2019_11_14_GB_TAFs_Glyco3_CTLdirect
XPO1	9_QPPWLN[+0.98402]QPT[+947.32303]GFYASSSVQDFSR	HexNAc(1)Hex(1)NeuAc(2)	2019_11_14_GB_TAFs_Glyco6_Direct24hr
XPO1	9_SAASYALGS[+406.15875]IS[+656.22761]VGNLPEYLPFVLQEITSQPK	HexNAc(2)	2019_11_14_GB_TAFs_Glyco6_Direct24hr
YARS	9_SAASYALGS[+656.22761]IS[+406.15875]VGNLPEYLPFVLQEITSQPK	HexNAc(1)Hex(1)NeuAc(1)	2019_11_14_GB_TAFs_Glyco6_Direct24hr
YARS	9_SALDTAARS[+947.32303]TKPPR	HexNAc(1)Hex(1)NeuAc(2)	2019_11_14_GB_TAFs_Glyco2_Direct24hr
YWHAQ	9_SALDTAARS[+947.32303]TKPPR	HexNAc(1)Hex(1)NeuAc(2)	2019_11_14_GB_TAFs_Glyco2_Direct24hr
ZC3HAV1	9_TIPM[+15.99492]SAIIT[+203.07937]QAGATGVTSSPGIK	HexNAc(1)	2019_11_14_GB_TAFs_Glyco1_CTLdirect
ZC3HAV1	9_TM[+15.99492]AVTPGTT[+203.07937]TLPATVK	HexNAc(1)	2019_11_14_GB_TAFs_Glyco3_CTLdirect
ZC3HAV1	9_TM[+15.99492]AVTPGTT[+203.07937]TLPATVK	HexNAc(1)	2019_11_14_GB_TAFs_Glyco4_Direct24hr
ZC3HAV1	9_VESQS[+203.07937]S[+1238.41845]FGT[+568.21157]LR	HexNAc(2)Hex(1)	2019_11_14_GB_TAFs_Glyco6_Direct24hr
ZW10	9_VLS[+568.21157]VET[+568.21157]PLS[+568.21157]IQAHPNKELAEK	HexNAc(2)Hex(1)	2019_11_14_GB_TAFs_Glyco6_Direct24hr
ZW10	9_VT[+1312.45523]HGC[+57.02146]IVS[+1312.45523]T[+1021.35981]IK	HexNAc(2)Hex(2)NeuAc(1)	2019_11_14_GB_TAFs_Glyco3_CTLdirect
ZW10	9_VT[+203.07937]WDGHS[+947.32303]GS[+406.15875]MAR	HexNAc(2)	2019_11_14_GB_TAFs_Glyco2_Direct24hr

## Sheet: Quantification_Results_table
			Peptide										Protein
Gene	Sequence	Modified	Control1	Control2	Control3	Coculture1	Coculture2	Coculture3	p-value	-log(p-value)	Diff_AVE	Sign_AVE	Control1	Control2	Control3	Coculture1	Coculture2	Coculture3	p-value	-log(p-value)	Diff_AVE	Sign_AVE
JUN	K.AQNSELASTANM[+15.99492]LR.E_2		0.0533949	-0.0533595	0.697133	-2.43689	-1.80865	-2.19338	0.00132336	2.87832	-2.37869	-6.84665	0.0822433	-0.233864	0.310365	-0.647107	-0.630226	-0.170312	0.0734151	1.13421	-0.535463	-0.60733
JUN	K.NVTDEQEGFAEGFVR.A_2		0.449514	0.0795905	0.0858985	0.661362	0.0765676	1.18161	0.272219	0.565081	0.434845	0.245722	0.0822433	-0.233864	0.310365	-0.647107	-0.630226	-0.170312	0.0734151	1.13421	-0.535463	-0.60733
>>sp|Q6ZSR9|YJ005_HUMAN Uncharacterized protein FLJ45252 OS=Homo sapiens OX=9606	R.HYSPEDEPSPEAQPIAAYK.I_2			3.35613		17.3095		17.4999	#DIV/0!	#DIV/0!	14.0486	#DIV/0!		1.77639		8.29693		8.63802	#DIV/0!	#DIV/0!	6.69109	#DIV/0!
>sp|Q6ZSR9|YJ005_HUMAN Uncharacterized protein FLJ45252 OS=Homo sapiens OX=9606	R.HYSPEDEPSPEAQPIAAYK.I_2			3.614		17.8878		18.0782	#DIV/0!	#DIV/0!	14.369	#DIV/0!		1.77639		8.29693		8.63802	#DIV/0!	#DIV/0!	6.69109	#DIV/0!
A2M	K.ATVLNYLPK.C_2		1.93342	-3.43143	-1.10501	-2.23967	-0.903603	-1.80815	0.650744	0.18659	-0.782805	-0.146063	1.53056	-1.08692	-1.11477	-0.294237	-0.0202188	-0.981919	0.83236	0.0796887	-0.208414	-0.0166082
A2M	K.GHFSISIPVK.S_2		0.717852	0.090839	-0.334433	0.0277738	-0.292715	0.180831	0.609092	0.215317	-0.186123	-0.0400754	1.53056	-1.08692	-1.11477	-0.294237	-0.0202188	-0.981919	0.83236	0.0796887	-0.208414	-0.0166082
A2M	K.LPPNVVEESAR.A_2		1.60135	-1.22162	-1.10654	-0.985438	-1.85248	-1.65518	0.260637	0.583963	-1.25543	-0.733127	1.53056	-1.08692	-1.11477	-0.294237	-0.0202188	-0.981919	0.83236	0.0796887	-0.208414	-0.0166082
A2M	K.PKM[+15.99492]C[+57.02146]PQLQQYEMHGPEGLR.V_2		-0.682107	-0.475697	1.53351	0.162439	-0.0494496	0.638538	0.872998	0.0589865	0.125273	0.00738942	1.53056	-1.08692	-1.11477	-0.294237	-0.0202188	-0.981919	0.83236	0.0796887	-0.208414	-0.0166082
A2M	K.YDVEN[+0.98402]C[+57.02146]LANK.V_2		0.972206	-0.0928739	-0.669405	1.19548	-1.12078	0.220905	0.974069	0.0114104	0.028561	0.000325892	1.53056	-1.08692	-1.11477	-0.294237	-0.0202188	-0.981919	0.83236	0.0796887	-0.208414	-0.0166082
A2M	R.GEAFTLK.A_1		0.00903638	0.233049	0.507489	-0.362574	1.88027	0.441815	0.580561	0.236152	0.403313	0.0952431	1.53056	-1.08692	-1.11477	-0.294237	-0.0202188	-0.981919	0.83236	0.0796887	-0.208414	-0.0166082
A2M	R.IAQWQSFQLEGGLK.Q_3		0.926457	0.197895	-1.04962	-0.495859	-1.12431	-1.47392	0.176325	0.753686	-1.05627	-0.796098	1.53056	-1.08692	-1.11477	-0.294237	-0.0202188	-0.981919	0.83236	0.0796887	-0.208414	-0.0166082
A2M	R.SASNMAIVDVK.M_2		0.45754	1.01162	-1.9726	-0.144276	1.63687	-2.09907	0.981807	0.00797409	-0.0343431	-0.000273855	1.53056	-1.08692	-1.11477	-0.294237	-0.0202188	-0.981919	0.83236	0.0796887	-0.208414	-0.0166082
AAAS	R.IAHIPLYFVNAQFPR.F_3		0.278363	-0.224272	0.594034	-0.493356	0.00564524	1.34675	0.912203	0.0399083	0.0703054	0.00280577	0.898329	-1.14912	0.173145	-0.644327	-0.829429	0.419354	0.672295	0.17244	-0.325587	-0.0561442
AAAS	R.LLSASPVDAAIR.V_2		1.27907	-1.22725	-0.1386	-1.04781	-1.80537	-1.17455	0.160008	0.795858	-1.31365	-1.04548	0.898329	-1.14912	0.173145	-0.644327	-0.829429	0.419354	0.672295	0.17244	-0.325587	-0.0561442
AACS	K.AVEQGGAFSNPETLDLYR.D_2		1.18243	-2.30051	0.597282	0.759085	-2.51952	-0.33547	0.734746	0.133863	-0.525035	-0.0702826	0.0977234	-2.18495	1.67066	1.71541	-0.89975	-0.000311456	0.77726	0.109434	0.410639	0.0449378
AACS	K.GIADVPEWFK.G_2		0.110709	0.220856	0.375092	2.45433	1.91806	1.6244	0.0022871	2.64072	1.76338	4.65658	0.0977234	-2.18495	1.67066	1.71541	-0.89975	-0.000311456	0.77726	0.109434	0.410639	0.0449378
AACS	K.M[+15.99492]ASGHAFQPDLVK.R_2		-0.724932	-2.01718	2.08541	3.09341	2.12434	1.23967	0.147785	0.830371	2.37138	1.96912	0.0977234	-2.18495	1.67066	1.71541	-0.89975	-0.000311456	0.77726	0.109434	0.410639	0.0449378
AACS	R.NLGM[+15.99492]AVEAWNEEGK.A_2		0.0056461	-0.58775	1.13228	-1.97186	-3.4083	-2.27068	0.0149301	1.82594	-2.73367	-4.99152	0.0977234	-2.18495	1.67066	1.71541	-0.89975	-0.000311456	0.77726	0.109434	0.410639	0.0449378
AAGAB	K.SGLDSVSSWLPLAK.A_2		0.764551	-0.620137	0.305719	-1.1071	-1.584	-0.992825	0.0365008	1.4377	-1.37802	-1.98118	0.592986	-0.736204	0.180365	-0.4982	-0.956466	-0.397735	0.215781	0.665987	-0.62985	-0.419471
AAK1	K.AGQTQPN[+0.98402]PGILPIQPALTPR.K_2		2.30667	-3.07829	-3.47499	2.23782		-2.48978	0.694722	0.158189	1.28955	0.203993	1.28049	-1.18699	-0.250816	-1.61492		-0.160791	0.493745	0.306498	-0.835417	-0.256053
AAK1	K.AGQTQPNPGILPIQPALTPR.K_2		0.897941	-1.04686	0.464178	-3.129		1.48835	0.656571	0.182718	-0.925412	-0.16909	1.28049	-1.18699	-0.250816	-1.61492		-0.160791	0.493745	0.306498	-0.835417	-0.256053
AAK1	K.LC[+57.02146]YFTLPFGES[+406.15875]QVAIC[+57.02146]DGNFTIPDNSR.Y_3	TRUE	0.809259	0.0218029	-0.416095	-0.872009	-2.58386	-1.8956	0.0350053	1.45587	-1.92215	-2.79839	1.28049	-1.18699	-0.250816	-1.61492	-0.374558	-0.160791	0.478206	0.320385	-0.664318	-0.212838
AAK1	K.LTAEELLNK.D_2		0.436691	-0.656655	0.800407	-0.81502	1.4423	-0.955699	0.751169	0.124262	-0.302955	-0.0376458	1.28049	-1.18699	-0.250816	-1.61492	-0.374558	-0.160791	0.478206	0.320385	-0.664318	-0.212838
AAK1	K.PQAPPSQPLPQTQAK.Q_2		0.203463	-0.618023	1.00926	-3.94375	-0.754954	0.0688482	0.254663	0.594035	-1.74152	-1.03452	1.28049	-1.18699	-0.250816	-1.61492	-0.374558	-0.160791	0.478206	0.320385	-0.664318	-0.212838
AAK1	K.STQLLQAAAAEASLNK.S_2		1.41232	-0.539237	-1.30865	-1.19915	-1.3523	-1.99796	0.180353	0.743877	-1.37128	-1.02007	1.28049	-1.18699	-0.250816	-1.61492	-0.374558	-0.160791	0.478206	0.320385	-0.664318	-0.212838
AAK1	K.VENILLHDRGHYVLC[+57.02146]DFGSATN[+0.98402]K.F_3			4.35694	-1.68446	0.767697	-0.558595		0.728928	0.137315	-1.23169	-0.169129		-1.18699	-0.250816	-1.61492	-0.374558		0.75653	0.121174	-0.275836	-0.0334241
AAK1	K.VQTTPPPAVQGQK.V_2		-0.62475	0.562642	0.686504	-2.03988	-0.329298	-1.01758	0.108564	0.964315	-1.33705	-1.28934	1.28049	-1.18699	-0.250816	-1.61492	-0.374558	-0.160791	0.478206	0.320385	-0.664318	-0.212838
AAK1	R.EQGGSGLGSGSSGGGGSTSGLGSGYIGR.V_2		4.09485		3.02197		-5.41298	1.23692	0.235629	0.627771	-5.64644	-3.54467	1.28049		-0.250816		-0.374558	-0.160791	0.417981	0.378843	-0.782511	-0.296449
AAK1	R.ILSDVTHSAVFGVPASK.S_2		-0.681476	0.174183	1.06679	-1.77962	-1.72759	-0.137233	0.130581	0.884118	-1.40131	-1.23893	1.28049	-1.18699	-0.250816	-1.61492	-0.374558	-0.160791	0.478206	0.320385	-0.664318	-0.212838
AAK1	R.LTDPIPTTETSIAPR.Q_2		-0.476388	0.44696	0.670324	1.74675	0.805571	0.141806	0.305598	0.514849	0.684409	0.352367	1.28049	-1.18699	-0.250816	-1.61492	-0.374558	-0.160791	0.478206	0.320385	-0.664318	-0.212838
AAK1	R.PDIYQVSYFSFKLLKK.E_2		0.04101	0.490597	-0.396262	-2.93568	-2.57762	-2.41044	0.00085215	3.06948	-2.68636	-8.24575	1.28049	-1.18699	-0.250816	-1.61492	-0.374558	-0.160791	0.478206	0.320385	-0.664318	-0.212838
AAMDC	K.VPSSTVEYLK.K_2		0.799795	-1.08197	0.595574	-0.814389	-0.639767	1.07329	0.798295	0.0978364	-0.231424	-0.0226416	-1.74765	-0.233132	1.32056	-0.825993	0.251763	2.25821	0.57031	0.243889	0.781402	0.190575
AAMDC	R.ETGTEHSPGVQPADVK.E_2		-3.69247	0.719198	1.38969	0.224072	1.74974	3.24302	0.280196	0.552539	2.2668	1.2525	-1.74765	-0.233132	1.32056	-0.825993	0.251763	2.25821	0.57031	0.243889	0.781402	0.190575
AAMP	K.DASLVVTTSGDHK.A_2		-3.02998	-1.69822	2.45312	-0.186756	-0.0952019	1.66409	0.526091	0.278939	1.21907	0.340047	-1.46023	-1.15863	1.7262	-0.0652439	-0.370527	0.94751	0.689943	0.161187	0.468135	0.0754572
AAMP	R.GHTAEILDFALSK.D_2		0.657486	-0.198136	0.0867246	0.262247	-0.304148	0.0230736	0.56474	0.248151	-0.188301	-0.0467271	-1.46023	-1.15863	1.7262	-0.0652439	-0.370527	0.94751	0.689943	0.161187	0.468135	0.0754572
AARS	K.AVYTQDC[+57.02146]PLAAAK.A_1		-2.11184	1.83092	-0.568397	-1.70374	-2.54368	-1.43557	0.248735	0.604263	-1.61122	-0.973604	0.877527	-0.972707	-0.174644	-0.122214	-1.91704	0.434642	0.643058	0.19175	-0.444928	-0.0853148
AARS	K.AVYTQDC[+57.02146]PLAAAK.A_2		0.80161	-0.843554	0.440788	-1.81766	-2.98186	-2.21058	0.0150822	1.82153	-2.46965	-4.49856	0.877527	-0.972707	-0.174644	-0.122214	-1.91704	0.434642	0.643058	0.19175	-0.444928	-0.0853148
AARS	K.DIINEEEVQFLK.T_2		-0.402641	-0.265796	1.22567	0.259231	-0.411402	0.272627	0.810427	0.0912859	-0.145591	-0.0132904	0.877527	-0.972707	-0.174644	-0.122214	-1.91704	0.434642	0.643058	0.19175	-0.444928	-0.0853148
AARS	K.KAEEIANEM[+15.99492]IEAAK.A_2		0.0686455	1.4639	-2.83349	0.92124	0.614774	2.7803	0.262012	0.581679	1.87242	1.08915	0.877527	-0.972707	-0.174644	-0.122214	-1.91704	0.434642	0.643058	0.19175	-0.444928	-0.0853148
AARS	K.KAEEIANEMIEAAK.A_2		-0.132731	0.513231	0.330383	-2.97046	0.191753	-0.594883	0.233001	0.632642	-1.36149	-0.861337	0.877527	-0.972707	-0.174644	-0.122214	-1.91704	0.434642	0.643058	0.19175	-0.444928	-0.0853148
AARS	K.M[+15.99492]ALELLTQEFGIPIER.L_2		2.1928	-2.37859	-3.46348	-2.86279	-2.36496	-2.47816	0.480401	0.318396	-1.35222	-0.43054	0.877527	-0.972707	-0.174644	-0.122214	-1.91704	0.434642	0.643058	0.19175	-0.444928	-0.0853148
AARS	K.M[+15.99492]ALELLTQEFGIPIER.L_3		2.07911	-2.11636	-3.38771	-2.9045	-1.20391	-3.13797	0.509403	0.292938	-1.27381	-0.373147	0.877527	-0.972707	-0.174644	-0.122214	-1.91704	0.434642	0.643058	0.19175	-0.444928	-0.0853148
AARS	K.M[+15.99492]HSPQTSAM[+15.99492]LFTVDNEAGK.I_2		2.08583	-2.73604	-2.68347	1.52487	0.694571	-0.248191	0.351577	0.45398	1.76831	0.802778	0.877527	-0.972707	-0.174644	-0.122214	-1.91704	0.434642	0.643058	0.19175	-0.444928	-0.0853148
AARS	K.M[+15.99492]HSPQTSAM[+15.99492]LFTVDNEAGK.I_3		0.446409	-0.856203	0.854835	1.68151	0.971738	0.857767	0.151065	0.820836	1.02199	0.838887	0.877527	-0.972707	-0.174644	-0.122214	-1.91704	0.434642	0.643058	0.19175	-0.444928	-0.0853148
AARS	K.M[+15.99492]SNYDTDLFVPYFEAIQK.G_2		1.49656	-0.686541	-1.52889	0.35785	-1.90765	-3.09121	0.389318	0.409695	-1.30738	-0.535627	0.877527	-0.972707	-0.174644	-0.122214	-1.91704	0.434642	0.643058	0.19175	-0.444928	-0.0853148
AARS	K.M[+15.99492]SNYDTDLFVPYFEAIQK.G_3		0.106065	0.315726	0.19097	0.226817	-1.79823	-0.114037	0.290144	0.537386	-0.76607	-0.411675	0.877527	-0.972707	-0.174644	-0.122214	-1.91704	0.434642	0.643058	0.19175	-0.444928	-0.0853148
AARS	K.MALELLTQEFGIPIER.L_2		-0.462589	0.689431	0.288289	0.226509	0.221616	1.59134	0.420982	0.375737	0.508112	0.190916	0.877527	-0.972707	-0.174644	-0.122214	-1.91704	0.434642	0.643058	0.19175	-0.444928	-0.0853148
AARS	K.MSNYDTDLFVPYFEAIQK.G_2		-1.85056	0.561329	1.51603	-1.81361	-0.0119672	0.259375	0.643084	0.191733	-0.597665	-0.114592	0.877527	-0.972707	-0.174644	-0.122214	-1.91704	0.434642	0.643058	0.19175	-0.444928	-0.0853148
AARS	K.NVGC[+57.02146]LQEALQLATSFAQLR.L_2		-0.465844	-0.906077	2.87329	2.18672	0.37625	3.40187	0.37223	0.429189	1.48782	0.638557	0.877527	-0.972707	-0.174644	-0.122214	-1.91704	0.434642	0.643058	0.19175	-0.444928	-0.0853148
AARS	K.NVGC[+57.02146]LQEALQLATSFAQLR.L_3		0.522066	-0.167569	0.0370821	0.711233	0.29425	0.572525	0.172515	0.763173	0.395476	0.301817	0.877527	-0.972707	-0.174644	-0.122214	-1.91704	0.434642	0.643058	0.19175	-0.444928	-0.0853148
AARS	K.PIFLNTIDPSHPM[+15.99492]AK.L_3		-0.139005	-0.60976	1.25191	-0.289759	-0.400466	0.998562	0.932183	0.0304987	-0.0649358	-0.00198046	0.877527	-0.972707	-0.174644	-0.122214	-1.91704	0.434642	0.643058	0.19175	-0.444928	-0.0853148
AARS	K.QFIDSNPN[+0.98402]QPLVILEM[+15.99492]ESGASAK.A_2		0.346744	0.496023	-0.62583	-0.972797	-2.25461	3.17544	0.959914	0.0177677	-0.0896337	-0.00159259	0.877527	-0.972707	-0.174644	-0.122214	-1.91704	0.434642	0.643058	0.19175	-0.444928	-0.0853148
AARS	K.QFIDSNPNQPLVILEM[+15.99492]ESGASAK.A_2		0.880979	-0.886883	0.369827	-0.42773	-3.09098	-0.508241	0.224719	0.64836	-1.46363	-0.948957	0.877527	-0.972707	-0.174644	-0.122214	-1.91704	0.434642	0.643058	0.19175	-0.444928	-0.0853148
AARS	K.QFIDSNPNQPLVILEM[+15.99492]ESGASAK.A_3		0.361586	0.526124	-0.485023	0.347304	1.3124	-0.880633	0.867902	0.0615295	0.125461	0.00771956	0.877527	-0.972707	-0.174644	-0.122214	-1.91704	0.434642	0.643058	0.19175	-0.444928	-0.0853148
AARS	K.QFIDSNPNQPLVILEMESGASAK.A_2		-0.765831	0.0450712	1.49905	-1.10597	-1.65254	0.363042	0.302693	0.518998	-1.05792	-0.549057	0.877527	-0.972707	-0.174644	-0.122214	-1.91704	0.434642	0.643058	0.19175	-0.444928	-0.0853148
AARS	K.VDDSSEDKTEFTVK.N_2		0.136818	0.334789	0.233507	5.03411	2.98205	1.22199	0.0614123	1.21174	2.84435	3.44662	0.877527	-0.972707	-0.174644	-0.122214	-1.91704	0.434642	0.643058	0.19175	-0.444928	-0.0853148
AARS	K.VGAEDADGIDM[+15.99492]AYR.V_2		0.992073	-1.64148	0.603848	-6.02862	-3.49395	0.561801	0.227656	0.642721	-2.97174	-1.91	0.877527	-0.972707	-0.174644	-0.122214	-1.91704	0.434642	0.643058	0.19175	-0.444928	-0.0853148
AARS	K.VGDQVWLFIDEPR.R_3		-0.109029	-0.578183	1.21979	-1.32931	-1.23716	-0.252007	0.155547	0.80814	-1.11702	-0.902709	0.877527	-0.972707	-0.174644	-0.122214	-1.91704	0.434642	0.643058	0.19175	-0.444928	-0.0853148
AARS	R.AVFDETYPDPVR.V_2		0.417721	0.680829	-0.754816	2.91819	0.894082	-0.174494	0.33748	0.471752	1.09801	0.51799	0.877527	-0.972707	-0.174644	-0.122214	-1.91704	0.434642	0.643058	0.19175	-0.444928	-0.0853148
AARS	R.EADGILKPLPK.K_2		0.504854	1.12355	-3.80821	1.9006	0.743333	-0.361425	0.426723	0.369854	1.48744	0.550134	0.877527	-0.972707	-0.174644	-0.122214	-1.91704	0.434642	0.643058	0.19175	-0.444928	-0.0853148
AARS	R.EIADLGEALATAVIPQWQK.D_2		1.01772	-1.64697	0.789245	0.572186	-0.584501	0.950371	0.802335	0.0956443	0.259354	0.0248057	0.877527	-0.972707	-0.174644	-0.122214	-1.91704	0.434642	0.643058	0.19175	-0.444928	-0.0853148
AARS	R.EIADLGEALATAVIPQWQK.D_3		0.505414	-0.606312	0.722436	-0.395057	-1.01097	0.224071	0.331509	0.479504	-0.601166	-0.288262	0.877527	-0.972707	-0.174644	-0.122214	-1.91704	0.434642	0.643058	0.19175	-0.444928	-0.0853148
AARS	R.FDFTAK.G_1		0.218639	-0.422054	0.834588	2.32607	1.48772	1.95381	0.0171964	1.76456	1.71215	3.02119	0.877527	-0.972707	-0.174644	-0.122214	-1.91704	0.434642	0.643058	0.19175	-0.444928	-0.0853148
AARS	R.GGYVLHIGTIYGDLK.V_2		-0.058769	-0.0998398	0.869403	1.12766	0.112168	0.578839	0.440415	0.356138	0.369292	0.131519	0.877527	-0.972707	-0.174644	-0.122214	-1.91704	0.434642	0.643058	0.19175	-0.444928	-0.0853148
AARS	R.GGYVLHIGTIYGDLK.V_3		1.36121	-3.32629	0.566412	-1.14752	-1.34701	0.417607	0.891232	0.050009	-0.226081	-0.0113061	0.877527	-0.972707	-0.174644	-0.122214	-1.91704	0.434642	0.643058	0.19175	-0.444928	-0.0853148
AARS	R.RIVAVTGAEAQK.A_2		-6.64298	-5.59153	3.29911	-9.42399	-5.71859	-4.23327	0.377676	0.422881	-3.48015	-1.47169	0.877527	-0.972707	-0.174644	-0.122214	-1.91704	0.434642	0.643058	0.19175	-0.444928	-0.0853148
AARS	R.RPIM[+15.99492]SNHTATHILNFALR.S_3		0.527307	0.661811	-0.961472	-2.76605	-3.65434	-2.55429	0.00776404	2.10991	-3.06744	-6.47204	0.877527	-0.972707	-0.174644	-0.122214	-1.91704	0.434642	0.643058	0.19175	-0.444928	-0.0853148
AARS	R.TITVALADGGRPDNTGR.G_2		-0.377394	-0.22043	1.17405	-1.17941	0.253377	1.41987	0.977093	0.0100639	-0.0274613	-0.000276369	0.877527	-0.972707	-0.174644	-0.122214	-1.91704	0.434642	0.643058	0.19175	-0.444928	-0.0853148
AARS	R.TITVALADGGRPDNTGR.G_3		-0.460774	0.151808	0.92856	-1.00832	0.422263	1.51024	0.90884	0.0415126	0.10153	0.00421479	0.877527	-0.972707	-0.174644	-0.122214	-1.91704	0.434642	0.643058	0.19175	-0.444928	-0.0853148
AARS	R.VVSIGVPVSELLDDPSGPAGSLTSVEFC[+57.02146]GGTHLR.N_3		-5.0904	1.52472	1.02203	-4.72378	-6.7544	-5.56243	0.0936698	1.0284	-4.83233	-4.96956	0.877527	-0.972707	-0.174644	-0.122214	-1.91704	0.434642	0.643058	0.19175	-0.444928	-0.0853148
AARSD1	K.GGGLFLLAGPPASVETLGPR.V_2		1.10387	-0.0414111	-1.62173	-1.44986	-1.91693	-1.91857	0.12211	0.913249	-1.57536	-1.4387	0.684688	-0.184207	-0.696755	0.782757	-1.01732	-0.3034	0.871491	0.0597369	-0.113895	-0.00680374
AARSD1	R.TNLIFLSGNR.V_2		0.173844	-0.025059	0.590057	2.24864	-0.0981226	0.971947	0.321033	0.493451	0.794542	0.392067	0.684688	-0.184207	-0.696755	0.782757	-1.01732	-0.3034	0.871491	0.0597369	-0.113895	-0.00680374
AASDHPPT	K.IDEHHFVAVALR.K_2		-0.481446	1.11751	-0.249376	1.37898	-0.901881	0.0326205	0.962914	0.0164125	0.041008	0.000673043	0.0608526	0.22517	-0.277524	1.05775	-0.707664	0.240732	0.733277	0.134732	0.194105	0.0261521
AASDHPPT	R.GSIPEFFHIM[+15.99492]K.R_2		0.865841	-0.47846	0.0206156	0.52819	0.0318702	0.58701	0.597384	0.223746	0.246358	0.0551217	0.0608526	0.22517	-0.277524	1.05775	-0.707664	0.240732	0.733277	0.134732	0.194105	0.0261521
AASS	K.VLVLGSGYISEPVLEYLSR.D_2		2.05142	-2.01649	-3.63364	3.39429		4.81688	0.0992895	1.0031	5.30516	5.32159	2.52743	-1.44123	-3.00445	1.41226		2.77893	0.299521	0.523573	2.73501	1.43197
AATF	K.ALLTTNQLPQPDVFPLFK.D_2		-0.62601	1.21296	-0.708302	-5.13551	-1.14691	-5.14757	0.0625656	1.20366	-3.76954	-4.53727	-0.0487884	0.444985	-0.798436	-2.28684	-0.3637	-1.2191	0.156435	0.805665	-1.1558	-0.931188
AATF	K.DKGGPEFSSALK.N_2		-0.34031	-0.75847	1.44222	-0.83149	-0.425205	0.6093	0.700724	0.154453	-0.330279	-0.0510126	-0.0487884	0.444985	-0.798436	-2.28684	-0.3637	-1.2191	0.156435	0.805665	-1.1558	-0.931188
AATF	K.NQIALWDQLLEGR.I_2		-0.30093	0.445356	0.507711	-0.598109	-0.821954	-0.774272	0.0241622	1.61686	-0.948824	-1.53412	-0.0487884	0.444985	-0.798436	-2.28684	-0.3637	-1.2191	0.156435	0.805665	-1.1558	-0.931188
AATF	K.TSSLDPNDQVAM[+15.99492]GR.Q_2		-0.0919091	1.47405	-2.32027	-0.00149147	1.06155	0.911119	0.446507	0.350172	0.96977	0.339586	-0.0487884	0.444985	-0.798436	-2.28684	-0.3637	-1.2191	0.156435	0.805665	-1.1558	-0.931188
AATF	R.FADFTVYR.N_2		1.36333	-0.620921	-0.978465	-3.20146	-2.99321	-2.96999	0.0152797	1.81589	-2.9762	-5.40445	-0.0487884	0.444985	-0.798436	-2.28684	-0.3637	-1.2191	0.156435	0.805665	-1.1558	-0.931188
ABCC1	K.EAPWQIQETAPPSSWPQVGR.V_3		0.0132058	0.504131	0.165685	0.157373	0.837217	0.863756	0.224471	0.648839	0.391775	0.254199	1.10765	0.516876	0.314384	0.370123	0.526985	1.14296	0.92468	0.0340086	0.0337185	0.00114672
ABCC1	K.GSVAYVPQQAWIQNDSLR.E_2		1.49458	-0.572205	-6.17144	-1.85031	-1.87844	-2.07883	0.93914	0.0272695	-0.18617	-0.00507675	1.10765	0.516876	0.314384	0.370123	0.526985	1.14296	0.92468	0.0340086	0.0337185	0.00114672
ABCC1	K.HIFENVIGPK.G_2		0.923358	-0.65417	0.108469	0.940342	0.909097	0.875932	0.16117	0.792716	0.782571	0.620357	1.10765	0.516876	0.314384	0.370123	0.526985	1.14296	0.92468	0.0340086	0.0337185	0.00114672
ABCC1	K.ILVLDEATAAVDLETDDLIQSTIR.T_2		-0.866362	0.760396	0.645327	0.773144	0.233981	2.87117	0.310845	0.507456	1.11298	0.564787	1.10765	0.516876	0.314384	0.370123	0.526985	1.14296	0.92468	0.0340086	0.0337185	0.00114672
ABCC1	K.ILVLDEATAAVDLETDDLIQSTIR.T_3		-1.25072	0.559874	1.19772	1.09163	1.02538	3.03057	0.191404	0.718048	1.54691	1.11075	1.10765	0.516876	0.314384	0.370123	0.526985	1.14296	0.92468	0.0340086	0.0337185	0.00114672
ABCC1	K.ITIIPQDPVLFSGSLR.M_2		0.594487	-0.109892	0.049033	-2.90201	-2.93387	-2.74091	0.00016396	3.78526	-3.03681	-11.4951	1.10765	0.516876	0.314384	0.370123	0.526985	1.14296	0.92468	0.0340086	0.0337185	0.00114672
ABCC1	K.LLIKFVN[+0.98402]DTK.A_2		0.348297	0.502829	-0.339387	0.296401	0.163286	-0.799871	0.546523	0.262392	-0.283974	-0.0745125	1.10765	0.516876	0.314384	0.370123	0.526985	1.14296	0.92468	0.0340086	0.0337185	0.00114672
ABCC1	K.LYAWELAFK.D_2		1.70871	-2.13912	-0.332078	1.64474	1.45919	0.916484	0.232038	0.63444	1.5943	1.01149	1.10765	0.516876	0.314384	0.370123	0.526985	1.14296	0.92468	0.0340086	0.0337185	0.00114672
ABCC1	K.SSTVGEIVN[+0.98402]LM[+15.99492]SVDAQR.F_2		0.977371	-0.0562473	-0.785263	1.01239	0.755153	0.211343	0.336692	0.472767	0.614341	0.29044	1.10765	0.516876	0.314384	0.370123	0.526985	1.14296	0.92468	0.0340086	0.0337185	0.00114672
ABCC1	K.SSTVGEIVNLM[+15.99492]SVDAQR.F_2		-0.111226	0.305226	0.481514	0.277189	0.00216186	-0.129221	0.456453	0.340604	-0.175128	-0.0596492	1.10765	0.516876	0.314384	0.370123	0.526985	1.14296	0.92468	0.0340086	0.0337185	0.00114672
ABCC1	K.VDANEEVEALIVK.S_2		-5.8941	1.7572	-0.0151777	1.40817	1.68531	2.30909	0.243043	0.614317	3.18488	1.95653	1.10765	0.516876	0.314384	0.370123	0.526985	1.14296	0.92468	0.0340086	0.0337185	0.00114672
ABCC1	R.EDLDFVLRHINVTINGGEK.V_4		-3.99956	1.46044	0.737493	0.974376	2.52743	0.0168461	0.394808	0.403614	1.77343	0.71578	1.10765	0.516876	0.314384	0.370123	0.526985	1.14296	0.92468	0.0340086	0.0337185	0.00114672
ABCC1	R.IFLSHEELEPDSIER.R_2		0.652007	-0.0916679	-0.0524616	1.02246	0.695787	4.0442	0.184281	0.734519	1.75152	1.28653	1.10765	0.516876	0.314384	0.370123	0.526985	1.14296	0.92468	0.0340086	0.0337185	0.00114672
ABCC4	K.M[+15.99492]SIIPQEPVLFTGTM[+15.99492]R.K_2		0.542862	-0.315774	0.354787	1.0421	0.221407	0.407459	0.37034	0.4314	0.363029	0.156611	1.821	-1.14369	0.042538	0.631127	-1.01489	0.129715	0.759351	0.119558	-0.324631	-0.0388121
ABCC4	K.SGIDFGSLLK.K_2		0.275924	0.079459	0.380843	-0.931967	-1.09522	-0.536428	0.00425227	2.37138	-1.09995	-2.60839	1.821	-1.14369	0.042538	0.631127	-1.01489	0.129715	0.759351	0.119558	-0.324631	-0.0388121
ABCC4	K.SSLLSAVLGELAPSHGLVSVHGR.I_3		7.44644			2.7157	-0.978887		#DIV/0!	#DIV/0!	-6.57804	#DIV/0!	1.821			0.631127	-1.01489		#DIV/0!	#DIV/0!	-2.01288	#DIV/0!
ABCC4	K.SSLLSAVLGELAPSHGLVSVHGR.I_4		0.853419	-0.506151	-0.0174869	-0.393661	-1.14283	-1.08157	0.101874	0.991939	-0.982613	-0.974692	1.821	-1.14369	0.042538	0.631127	-1.01489	0.129715	0.759351	0.119558	-0.324631	-0.0388121
ABCC4	K.VIQPIFLGK.I_2		1.82657	-1.90969	-1.14135	1.50927	0.704861	1.51367	0.231256	0.635908	1.65076	1.04973	1.821	-1.14369	0.042538	0.631127	-1.01489	0.129715	0.759351	0.119558	-0.324631	-0.0388121
ABCC4	R.LKEYDEPYVLLQNK.E_2		-0.650297	-0.286832	1.36697	-1.80238	-1.44122	0.517563	0.330792	0.480445	-1.05196	-0.505409	1.821	-1.14369	0.042538	0.631127	-1.01489	0.129715	0.759351	0.119558	-0.324631	-0.0388121
ABCC4	R.SPVFSHLSSSLQGLWTIR.A_3		0.559015	0.195305	-0.409357	-0.310993	-0.193079	-1.26733	0.18579	0.730978	-0.705454	-0.515672	1.821	-1.14369	0.042538	0.631127	-1.01489	0.129715	0.759351	0.119558	-0.324631	-0.0388121
ABCD3	K.SSLFRVLGELWPLFGGR.L_3		-0.303135	0.743241	0.0706014	-0.72283	-1.36482	-0.481829	0.0638572	1.19479	-1.02673	-1.22672	-1.48945	0.614831	0.309624	0.658458	-0.431543	-0.670487	0.960777	0.0173773	0.0404741	0.000703329
ABCD3	K.STHSELLEDYYQSGR.M_2		-3.54911	2.20851	-1.33107	1.51051	-1.87469	-2.67196	0.95686	0.0191518	-0.121489	-0.00232673	-1.48945	0.614831	0.309624	0.658458	-0.431543	-0.670487	0.960777	0.0173773	0.0404741	0.000703329
ABCD3	K.STHSELLEDYYQSGR.M_3		-0.0623557	0.182377	0.638199	2.15144	2.37596	2.69385	0.00113517	2.94494	2.15435	6.34441	-1.48945	0.614831	0.309624	0.658458	-0.431543	-0.670487	0.960777	0.0173773	0.0404741	0.000703329
ABCD3	K.YLYEEYLQAFT[+1312.45523]YYKMGNLDNR.I_3	TRUE	4.10747		-3.22403			8.91451	#DIV/0!	#DIV/0!	8.47279	#DIV/0!	-1.48945		0.309624			-0.670487	#DIV/0!	#DIV/0!	-0.0805748	#DIV/0!
ABCD3	R.VLGELWPLFGGR.L_2		0.686281	-2.04491	1.31856	-1.80208	-0.574391	-1.58878	0.299789	0.523185	-1.3084	-0.684533	-1.48945	0.614831	0.309624	0.658458	-0.431543	-0.670487	0.960777	0.0173773	0.0404741	0.000703329
ABCE1	K.ADIFM[+15.99492]FDEPSSYLDVK.Q_2		1.95591	-2.53502	-1.32322	0.0474744	0.215499	-0.447026	0.694474	0.158344	0.57276	0.0906932	-0.283197	-1.03248	0.0281243	1.04253	2.24612	0.540101	0.0458709	1.33846	1.70543	2.28266
ABCE1	K.AIIKPQYVDQIPK.A_2		0.771199	-3.01648	1.22582	4.69995	4.66895	3.85404	0.0258695	1.58721	4.74747	7.53524	-0.283197	-1.03248	0.0281243	1.04253	2.24612	0.540101	0.0458709	1.33846	1.70543	2.28266
ABCE1	K.AIIKPQYVDQIPK.A_3		-1.23288	1.03187	0.504408	-1.58628	2.3645	-0.0969195	0.929615	0.0316969	0.125967	0.00399276	-0.283197	-1.03248	0.0281243	1.04253	2.24612	0.540101	0.0458709	1.33846	1.70543	2.28266
ABCE1	K.KC[+57.02146]PFGALSIVNLPSNLEK.E_3		0.817582	-0.366047	-0.21856		3.76734	-0.606655	0.441712	0.35486	1.50269	0.533243	-0.283197	-1.03248	0.0281243		2.24612	0.540101	0.0945861	1.02417	1.82229	1.86634
ABCE1	K.NTVAN[+0.98402]SPQTLLAGMNK.F_2		0.612094	0.170248	-0.280424	0.67398	1.14242	-0.324978	0.54827	0.261006	0.329835	0.0860889	-0.283197	-1.03248	0.0281243	1.04253	2.24612	0.540101	0.0458709	1.33846	1.70543	2.28266
ABCE1	K.NTVANSPQTLLAGM[+15.99492]NK.F_2		0.119649	1.10045	-1.17453	0.370089	1.05595	0.286195	0.473276	0.324885	0.555556	0.180492	-0.283197	-1.03248	0.0281243	1.04253	2.24612	0.540101	0.0458709	1.33846	1.70543	2.28266
ABCE1	K.PADVYLIDEPSAYLDSEQR.L_2		0.45431	-0.789509	0.849919	-1.50213	0.976739	-1.53411	0.425146	0.371462	-0.858073	-0.318742	-0.283197	-1.03248	0.0281243	1.04253	2.24612	0.540101	0.0458709	1.33846	1.70543	2.28266
ABCE1	K.TQAIVC[+57.02146]QQLDLTHLK.E_2		0.657774	-0.0566726	-0.0380075	1.44529	0.60803	-0.244271	0.485818	0.313526	0.415318	0.130213	-0.283197	-1.03248	0.0281243	1.04253	2.24612	0.540101	0.0458709	1.33846	1.70543	2.28266
ABCE1	K.TQAIVC[+57.02146]QQLDLTHLK.E_3		1.14612	0.178642	-2.37137	3.96161	1.79828	3.22031	0.052672	1.27842	3.34227	4.27283	-0.283197	-1.03248	0.0281243	1.04253	2.24612	0.540101	0.0458709	1.33846	1.70543	2.28266
ABCE1	K.YDDPPDWQEILTYFR.G_2		-1.26927	0.493872	1.30982	0.841202	1.47091	3.14448	0.184855	0.733169	1.64072	1.20293	-0.283197	-1.03248	0.0281243	1.04253	2.24612	0.540101	0.0458709	1.33846	1.70543	2.28266
ABCE1	R.DAYTHPQFVTDVM[+15.99492]K.P_3		-3.12475	-4.07248	3.06342	-0.910994	-1.68483	2.36422	0.63794	0.19522	1.30074	0.25393	-0.283197	-1.03248	0.0281243	1.04253	2.24612	0.540101	0.0458709	1.33846	1.70543	2.28266
ABCE1	R.DAYTHPQFVTDVM[+15.99492]KPLQIENIIDQEVQTLSGGELQR.V_4		-0.475467	1.43657	-2.74416	0.90585	0.873606	2.46545	0.201948	0.694761	2.00932	1.396	-0.283197	-1.03248	0.0281243	1.04253	2.24612	0.540101	0.0458709	1.33846	1.70543	2.28266
ABCE1	R.EGINIFLDGYVPTENLR.F_2		-0.903513	0.677099	0.780067	0.339572	0.0509535	-0.174293	0.851861	0.0696313	-0.112473	-0.00783167	-0.283197	-1.03248	0.0281243	1.04253	2.24612	0.540101	0.0458709	1.33846	1.70543	2.28266
ABCE1	R.GSELQNYFTK.I_2		0.061334	0.54636	0.0505651	0.185231	0.438186	-0.435433	0.636232	0.196384	-0.156758	-0.0307849	-0.283197	-1.03248	0.0281243	1.04253	2.24612	0.540101	0.0458709	1.33846	1.70543	2.28266
ABCE1	R.LKPDEGGEVPVLNVSYKPQK.I_2		-0.0541146	0.0876872	0.706262			-2.83061	#DIV/0!	#DIV/0!	-3.07722	#DIV/0!	-0.283197	-1.03248	0.0281243			0.540101	#DIV/0!	#DIV/0!	0.969284	#DIV/0!
ABCE1	R.LKPDEGGEVPVLNVSYKPQK.I_3		1.04562	-0.0882185	-0.865949	4.17857	5.42832	3.22152	0.00740272	2.13061	4.24565	9.04582	-0.283197	-1.03248	0.0281243	1.04253	2.24612	0.540101	0.0458709	1.33846	1.70543	2.28266
ABCE1	R.LKPDEGGEVPVLNVSYKPQK.I_4		-3.90154	2.55386	-2.89897	1.8504	3.2231	-1.16223	0.318292	0.497174	2.71931	1.35197	-0.283197	-1.03248	0.0281243	1.04253	2.24612	0.540101	0.0458709	1.33846	1.70543	2.28266
ABCE1	R.NVEDLSGGELQR.F_2		-1.01386	-3.24683	2.34364	-1.75668	-1.99974	-0.48345	0.67087	0.173361	-0.774274	-0.134229	-0.283197	-1.03248	0.0281243	1.04253	2.24612	0.540101	0.0458709	1.33846	1.70543	2.28266
ABCE1	R.PGEVLGLVGTN[+0.98402]GIGK.S_2		0.178668	0.476036	-0.0376773	0.692469	0.632932	0.190807	0.239864	0.620035	0.299727	0.185841	-0.283197	-1.03248	0.0281243	1.04253	2.24612	0.540101	0.0458709	1.33846	1.70543	2.28266
ABCE1	R.VIVFDGVPSK.N_1		1.43706	-2.22637	0.108004	-0.0510486	-1.57401	0.314776	0.871581	0.0596924	-0.209659	-0.012515	-0.283197	-1.03248	0.0281243	1.04253	2.24612	0.540101	0.0458709	1.33846	1.70543	2.28266
ABCF1	K.AVSEEQQPALK.G_2		-0.0267381	0.763473	-0.144705	-1.69748	-1.40372	-2.18447	0.00580778	2.23599	-1.95924	-4.38083	-0.0647976	0.757458	-0.358732	-0.789145	1.28817	-1.06867	0.730447	0.136411	-0.301192	-0.041086
ABCF1	K.EPPKQGKEKAK.K_2		-5.67835	1.36171	0.740162	-1.48191	2.36461	2.81258	0.409011	0.388265	2.42392	0.941124	-0.0647976	0.757458	-0.358732	-0.789145	1.28817	-1.06867	0.730447	0.136411	-0.301192	-0.041086
ABCF1	K.EQQQQQQQQQQK.K_3		-1.0646	0.805289	0.683354	-1.32067	0.0130088	-0.241993	0.418019	0.378804	-0.657899	-0.249215	-0.0647976	0.757458	-0.358732	-0.789145	1.28817	-1.06867	0.730447	0.136411	-0.301192	-0.041086
ABCF1	K.GAVIVVSHDAR.L_2		-0.45527	1.45485	-1.07898	0.109827	0.529136	-0.880227	0.953485	0.0206863	-0.0539537	-0.0011161	-0.0647976	0.757458	-0.358732	-0.789145	1.28817	-1.06867	0.730447	0.136411	-0.301192	-0.041086
ABCF1	K.IGFFNQQYAEQLR.M_2		1.18437	-0.373084	-0.813217	-0.92256	-0.757937	-1.64202	0.170848	0.76739	-1.10686	-0.849396	-0.0647976	0.757458	-0.358732	-0.789145	1.28817	-1.06867	0.730447	0.136411	-0.301192	-0.041086
ABCF1	K.KLS[+406.15875]VPT[+406.15875]SDEEDEVPAPK.P_3	TRUE		4.28354		0.76932			#DIV/0!	#DIV/0!	-3.51422	#DIV/0!		0.757458		-0.789145			#DIV/0!	#DIV/0!	-1.5466	#DIV/0!
ABCF1	K.NQDEESQEAPELLK.R_2		0.04672	-1.4643	1.49714	0.503205	2.30951	-1.14306	0.707181	0.15047	0.530031	0.0797536	-0.0647976	0.757458	-0.358732	-0.789145	1.28817	-1.06867	0.730447	0.136411	-0.301192	-0.041086
ABCF1	K.PLFKN[+0.98402]LDFGIDMDS[+568.21157]R.I_2	TRUE	7.92901			6.09324			#DIV/0!	#DIV/0!	-1.83577	#DIV/0!	-0.0647976			-0.789145			#DIV/0!	#DIV/0!	-0.724348	#DIV/0!
ABCF1	K.STLLLLLTGK.L_2		-1.30156	1.97392	-2.59405	-0.158014	0.196294	-3.05951	0.840435	0.0754958	-0.366515	-0.0276703	-0.0647976	0.757458	-0.358732	-0.789145	1.28817	-1.06867	0.730447	0.136411	-0.301192	-0.041086
ABCF1	R.ILAGLGFDPEMQNRPTQK.F_3		0.488732	-0.350551	0.5063	0.615745	0.296274	0.333119	0.54131	0.266554	0.200219	0.0533692	-0.0647976	0.757458	-0.358732	-0.789145	1.28817	-1.06867	0.730447	0.136411	-0.301192	-0.041086
ABCF1	R.LQGQLEQGDDTAAER.L_2		1.2845	-0.728762	-0.602817	-0.134042	0.319737	0.0657688	0.888156	0.0515109	0.0995149	0.0051261	-0.0647976	0.757458	-0.358732	-0.789145	1.28817	-1.06867	0.730447	0.136411	-0.301192	-0.041086
ABCF2	K.GHEENGDVVTEPQVAEK.N_3		-1.82364	1.44897	0.158684	-1.30562	-0.254714	-0.91244	0.493695	0.306541	-0.752262	-0.230599	-1.24965	0.732149	0.661714	-0.550031	0.209045	0.726449	0.919515	0.0364413	0.0804161	0.00293047
ABCF2	K.IPPPVIM[+15.99492]VQNVSFK.Y_2		-1.33933	0.50309	1.11853	0.428123	-0.639441	-0.155154	0.800364	0.0967126	-0.216254	-0.0209145	-1.24965	0.732149	0.661714	-0.550031	0.209045	0.726449	0.919515	0.0364413	0.0804161	0.00293047
ABCF2	K.LLTGELLPTDGM[+15.99492]IR.K_2		-1.96233	1.07135	0.782426	-1.45562	1.86748	2.76641	0.532866	0.273382	1.09561	0.299521	-1.24965	0.732149	0.661714	-0.550031	0.209045	0.726449	0.919515	0.0364413	0.0804161	0.00293047
ABCF2	K.LVDEEPQLTK.R_2		1.4762	-0.710781	-1.31289	-1.85956	-1.97229	-2.30706	0.0955536	1.01975	-1.86381	-1.90063	-1.24965	0.732149	0.661714	-0.550031	0.209045	0.726449	0.919515	0.0364413	0.0804161	0.00293047
ABCF2	K.TPLHC[+57.02146]VM[+15.99492]EVDTER.A_2		0.962583	-0.207333	-0.460869	-1.59499	-1.85769	-2.61385	0.0165584	1.78098	-2.1203	-3.77622	-1.24965	0.732149	0.661714	-0.550031	0.209045	0.726449	0.919515	0.0364413	0.0804161	0.00293047
ABCF2	K.TRLELEENQM[+15.99492]K.R_2		-1.44327	1.36606	0.0977581	-2.56064	-0.421012	1.46736	0.736672	0.132726	-0.511617	-0.0679047	-1.24965	0.732149	0.661714	-0.550031	0.209045	0.726449	0.919515	0.0364413	0.0804161	0.00293047
ABCF2	K.WPGDILAYK.E_2		-0.341474	-0.853153	1.5651	4.53037	3.37504	4.41707	0.00837845	2.07684	3.984	8.27413	-1.24965	0.732149	0.661714	-0.550031	0.209045	0.726449	0.919515	0.0364413	0.0804161	0.00293047
ABCF2	K.YYTGNYDQYVK.T_2		-0.60196	0.640103	0.554185	0.284869	-0.216986	0.144942	0.782013	0.106786	-0.126501	-0.0135086	-1.24965	0.732149	0.661714	-0.550031	0.209045	0.726449	0.919515	0.0364413	0.0804161	0.00293047
ABCF2	R.ETTEVDLLTK.E_1		-0.292437	0.93311	-0.162706		3.46031	0.411756	0.247944	0.605647	1.77671	1.07606	-1.24965	0.732149	0.661714		0.209045	0.726449	0.658989	0.181122	0.419675	0.0760125
ABCF2	R.EVPIPEHIDIYHLTR.E_2		0.252356	0.47407	-0.503951	-0.386474	-0.159114	0.123179	0.551151	0.258729	-0.214961	-0.0556168	-1.24965	0.732149	0.661714	-0.550031	0.209045	0.726449	0.919515	0.0364413	0.0804161	0.00293047
ABCF2	R.EVPIPEHIDIYHLTR.E_3		0.365798	-0.457973	0.69596	0.499509	-0.0631713	0.798151	0.647535	0.188736	0.210234	0.0396789	-1.24965	0.732149	0.661714	-0.550031	0.209045	0.726449	0.919515	0.0364413	0.0804161	0.00293047
ABCF2	R.FHWEQDQIAHM[+15.99492]K.N_2		-0.712095	0.738801	0.520727	1.22955	1.36113	1.52363	0.0608914	1.21544	1.18896	1.44511	-1.24965	0.732149	0.661714	-0.550031	0.209045	0.726449	0.919515	0.0364413	0.0804161	0.00293047
ABCF2	R.FHWEQDQIAHM[+15.99492]K.N_3		1.05241	0.0767816	-1.20088	-0.404568	0.20003	-1.05544	0.623721	0.20501	-0.396096	-0.0812035	-1.24965	0.732149	0.661714	-0.550031	0.209045	0.726449	0.919515	0.0364413	0.0804161	0.00293047
ABCF2	R.ILHGLGFTPAM[+15.99492]QR.K_2		-5.55427	1.51887	0.185786	2.80327	3.25779	3.54544	0.108836	0.963227	4.48537	4.32043	-1.24965	0.732149	0.661714	-0.550031	0.209045	0.726449	0.919515	0.0364413	0.0804161	0.00293047
ABCF2	R.KGHEEN[+0.98402]GDVVTEPQVAEK.N_2		-1.30451	-0.0666945	1.56026	-3.22798	-5.13524	-3.15689	0.0206885	1.68427	-3.90306	-6.57381	-1.24965	0.732149	0.661714	-0.550031	0.209045	0.726449	0.919515	0.0364413	0.0804161	0.00293047
ABCF2	R.KGHEEN[+0.98402]GDVVTEPQVAEK.N_3		0.147415	-0.749348	1.10537	-1.02638	-1.48233	-0.0556898	0.20759	0.682794	-1.02261	-0.698234	-1.24965	0.732149	0.661714	-0.550031	0.209045	0.726449	0.919515	0.0364413	0.0804161	0.00293047
ABCF3	K.TSNPLVLEEASASQAGSR.K_2		0.99697	-0.0784347	-0.761404	-1.52742	-1.26486	-0.807259	0.0863999	1.06349	-1.25222	-1.33172	0.213191	0.0969203	-0.482209	0.48035	-0.177275	-0.753236	0.83469	0.0784748	-0.0926875	-0.00727363
ABCF3	R.AEGSEAAELAEIYAK.L_2		0.373718	0.411099	-0.22396	0.285856	-0.503562	-1.10562	0.237354	0.624604	-0.628062	-0.39229	0.213191	0.0969203	-0.482209	0.48035	-0.177275	-0.753236	0.83469	0.0784748	-0.0926875	-0.00727363
ABCF3	R.ALLQEQFR.R_2		-1.729	1.31352	0.340584	1.41053	-0.0175941	-0.118352	0.68314	0.16549	0.449827	0.0744419	0.213191	0.0969203	-0.482209	0.48035	-0.177275	-0.753236	0.83469	0.0784748	-0.0926875	-0.00727363
ABCF3	R.ASVILAGLGFTPK.M_2		1.22039	-0.950286	-0.227456	0.221958	-0.523961	-0.540353	0.689287	0.1616	-0.295002	-0.0476723	0.213191	0.0969203	-0.482209	0.48035	-0.177275	-0.753236	0.83469	0.0784748	-0.0926875	-0.00727363
ABCF3	R.LAEPQSQGNSQVLLDAPIQLSK.I_2		-8.40975	1.71768	-11.5437	-6.87555	-1.75605	-8.98623	0.965996	0.0150248	0.205978	0.00309479	0.213191	0.0969203	-0.482209	0.48035	-0.177275	-0.753236	0.83469	0.0784748	-0.0926875	-0.00727363
ABHD10	K.FNQLPVELK.K_2		0.0963751	0.388378	0.22439	-0.415798	-0.874238	-0.221674	0.0247485	1.60645	-0.740284	-1.18923	0.64371	-0.664413	-0.197269	0.0312248	-0.85351	-1.13098	0.327445	0.484862	-0.578432	-0.28046
ABHD10	K.SPGIIFIPGYLSYM[+15.99492]N[+0.98402]GTK.A_2		-0.368458	0.915075	-0.107021	-0.134068	-0.297926	-0.943715	0.261378	0.582732	-0.605101	-0.352612	0.64371	-0.664413	-0.197269	0.0312248	-0.85351	-1.13098	0.327445	0.484862	-0.578432	-0.28046
ABHD10	K.SPGIIFIPGYLSYM[+15.99492]NGTK.A_2		0.262588	-0.0662172	0.453919	-1.0399	-0.801644	-1.25654	0.00339732	2.46886	-1.24946	-3.08474	0.64371	-0.664413	-0.197269	0.0312248	-0.85351	-1.13098	0.327445	0.484862	-0.578432	-0.28046
ABHD10	K.TSLSFLNRPDLPNLAYK.K_3		1.77729	-2.27543	-0.768944	0.171208	-1.49772	-1.79869	0.666111	0.176453	-0.61937	-0.10929	0.64371	-0.664413	-0.197269	0.0312248	-0.85351	-1.13098	0.327445	0.484862	-0.578432	-0.28046
ABHD11	R.LLDGEAALPAVVFLHGLFGSK.T_3		0.256741	0.124941	-0.0144128	0.321732	0.373993	0.825714	0.096902	1.01367	0.384723	0.389981	0.141753	0.0110042	-0.104387	0.0870956	0.138045	0.563869	0.213482	0.670639	0.24688	0.165567
ABHD12	K.SHPFSVIYR.Y_2		-0.0238085	-0.242947	0.91414	-1.4924	-1.86059	-1.55868	0.00762749	2.11762	-1.85302	-3.92398	0.0187392	-0.0316762	0.0463837	-1.15494	-1.61137	-0.877441	0.00469216	2.32863	-1.22573	-2.85428
ABHD12	K.VQFVPFHSDLGYR.H_3		0.282829	0.2704	0.131772	-0.744481	-0.902699	0.0399736	0.0609322	1.21515	-0.764069	-0.928461	0.0187392	-0.0316762	0.0463837	-1.15494	-1.61137	-0.877441	0.00469216	2.32863	-1.22573	-2.85428
ABHD12	R.ETPPDALILESPFTNIR.E_2		-0.0674868	0.719743	-0.133767	-0.94401	-2.07625	-2.11822	0.0162304	1.78967	-1.88566	-3.3747	0.0187392	-0.0316762	0.0463837	-1.15494	-1.61137	-0.877441	0.00469216	2.32863	-1.22573	-2.85428
ABHD12	R.ETPPDALILESPFTNIR.E_3		1.30443	-0.396279	-1.48646	-1.87076	-2.88811	-2.66511	0.0583948	1.23363	-2.28189	-2.815	0.0187392	-0.0316762	0.0463837	-1.15494	-1.61137	-0.877441	0.00469216	2.32863	-1.22573	-2.85428
ABHD12	R.GM[+15.99492]TYDALHVFDWIK.A_3		-0.065214	0.382677	0.336732	-0.827424	-0.610722	-1.00289	0.00476965	2.32151	-1.03174	-2.39521	0.0187392	-0.0316762	0.0463837	-1.15494	-1.61137	-0.877441	0.00469216	2.32863	-1.22573	-2.85428
ABHD12	R.KLYSIAAPAR.S_2		-0.473471	0.11623	0.993604	-1.24207	-0.0985743	0.9229	0.666566	0.176157	-0.35137	-0.0618961	0.0187392	-0.0316762	0.0463837	-1.15494	-1.61137	-0.877441	0.00469216	2.32863	-1.22573	-2.85428
ABHD14B	R.AVAIDLPGLGHSK.E_2		1.95683	-1.3465	-3.50477	-2.86233	-3.28967	-5.21904	0.180864	0.742647	-2.82553	-2.09837	1.1105	-0.514849	-1.39994	-0.290866	-0.683031	-2.33756	0.435902	0.360611	-0.83572	-0.30137
ABHD14B	R.FSSETWQNLGTLHR.L_3		0.644725	0.291075	-0.50766	-0.46339	-0.759137	-1.36587	0.0805225	1.09408	-1.00551	-1.10011	1.1105	-0.514849	-1.39994	-0.290866	-0.683031	-2.33756	0.435902	0.360611	-0.83572	-0.30137
ABHD14B	R.FSVLLLHGIR.F_2		-0.496348	0.0486525	1.05724	0.591757	0.552	-0.298892	0.891511	0.0498734	0.0784401	0.00391207	1.1105	-0.514849	-1.39994	-0.290866	-0.683031	-2.33756	0.435902	0.360611	-0.83572	-0.30137
ABHD5	R.ALGAALTPFNPLAGLR.I_2		-0.418044	0.76389	0.0354498	-0.0962426	-1.02948	-0.691433	0.170563	0.768115	-0.732819	-0.562889	0.868013	-0.888444	-0.250245	-0.0114669	-0.707262	-0.973693	0.465459	0.332118	-0.473915	-0.157396
ABHD5	R.IAGPFGLSLVQR.L_2		1.56949	-1.80738	-0.371289	-0.799363	-0.955326	-1.68355	0.405721	0.391773	-0.943018	-0.369449	0.868013	-0.888444	-0.250245	-0.0114669	-0.707262	-0.973693	0.465459	0.332118	-0.473915	-0.157396
ABI1	K.VVAIYDYTK.D_2		0.839642	-0.531266	0.164861	0.388115	-0.27953	-2.62559	0.373521	0.427685	-0.996748	-0.426294	-2.08495	0.625627	0.993724	-0.488228	-0.61689	-1.9953	0.463241	0.334193	-0.878275	-0.293514
ABI1	M.[+42.01056]AELQM[+15.99492]LLEEEIPSGK.R_2		-0.56703	0.930112	-0.0352308	-1.01478	-1.42437	-0.0750602	0.185324	0.732069	-0.947354	-0.693528	-2.08495	0.625627	0.993724	-0.488228	-0.61689	-1.9953	0.463241	0.334193	-0.878275	-0.293514
ABI1	M.[+42.01056]AELQMLLEEEIPSGK.R_2		-0.665333	0.730085	0.389749	0.510708	-0.36879	0.480368	0.917869	0.0372191	0.0559287	0.00208161	-2.08495	0.625627	0.993724	-0.488228	-0.61689	-1.9953	0.463241	0.334193	-0.878275	-0.293514
ABI1	R.KPIDYTVLDDVGHGVK.W_2		-3.37878	-1.85838	2.70346		-2.48603	-2.45879	0.539801	0.267766	-1.62784	-0.43588	-2.08495	0.625627	0.993724		-0.61689	-1.9953	0.457895	0.339234	-1.1509	-0.390424
ABI1	R.M[+15.99492]ESSINHISQTVDIHK.E_2		-0.2241	1.04516	-0.563709	2.65267	2.34941	-0.144014	0.20436	0.689603	1.53357	1.05756	-2.08495	0.625627	0.993724	-0.488228	-0.61689	-1.9953	0.463241	0.334193	-0.878275	-0.293514
ABI1	R.M[+15.99492]ESSINHISQTVDIHK.E_3		-1.34786	1.02874	0.557668	-3.02171	-1.51334	-3.71758	0.0440169	1.35638	-2.83039	-3.83909	-2.08495	0.625627	0.993724	-0.488228	-0.61689	-1.9953	0.463241	0.334193	-0.878275	-0.293514
ABI1	R.RM[+15.99492]ESSINHISQTVDIHK.E_4		-1.49251	1.19918	0.400692	-2.33692	-0.506092	-1.5629	0.19158	0.717651	-1.50442	-1.07965	-2.08495	0.625627	0.993724	-0.488228	-0.61689	-1.9953	0.463241	0.334193	-0.878275	-0.293514
ABI1	R.VTGLFPGNYVESIM[+15.99492]HYTD.-_2		-0.215486	0.525285	0.330084	-0.70772	-1.63258	-0.674919	0.0338403	1.47057	-1.21837	-1.79169	-2.08495	0.625627	0.993724	-0.488228	-0.61689	-1.9953	0.463241	0.334193	-0.878275	-0.293514
ABI1	R.VTGLFPGNYVESIMHYTD.-_2		-0.178993	0.370489	0.465536	-1.39827	-1.00995	-1.50995	0.00374124	2.42698	-1.52507	-3.70131	-2.08495	0.625627	0.993724	-0.488228	-0.61689	-1.9953	0.463241	0.334193	-0.878275	-0.293514
ABI2	K.VVAIYDYTK.D_2		0.827814	-0.543093	0.153033	0.401606	-0.266038	-2.6121	0.384566	0.415029	-0.971429	-0.403172	-0.464343	0.39398	0.0640949	-0.446161	0.165038	-2.31634	0.33414	0.476071	-0.863732	-0.411198
ABI2	R.KPIDYTILDDIGHGVK.W_3		0.0507038	0.765423	-0.250926	0.022167	0.399643	-0.0739546	0.839001	0.0762375	-0.0724485	-0.00552329	-0.464343	0.39398	0.0640949	-0.446161	0.165038	-2.31634	0.33414	0.476071	-0.863732	-0.411198
ABI2	R.M[+15.99492]ESSINHISQTVDIHK.E_3		-1.34574	1.03086	0.55979	-3.0409	-1.53253	-3.73677	0.0430651	1.36587	-2.8517	-3.89507	-0.464343	0.39398	0.0640949	-0.446161	0.165038	-2.31634	0.33414	0.476071	-0.863732	-0.411198
ABR	K.GQIQLDPQTVETK.N_2		0.445724	-0.0243317	-0.406638	-0.329809	-0.835963	-0.676937	0.0982065	1.00786	-0.619154	-0.624021	-0.563006	-0.359361	0.463265	2.66348	1.1868	-0.27023	0.210274	0.677214	1.34639	0.911791
ABR	R.ISQN[+0.98402]FLSSINEDIDPR.R_2		-0.537095	0.91777	0.107974	0.619041	-0.14419	-1.12468	0.594554	0.225809	-0.379494	-0.0856929	-0.563006	-0.359361	0.463265	2.66348	1.1868	-0.27023	0.210274	0.677214	1.34639	0.911791
ABR	R.ISQNFLSSIN[+0.98402]EDIDPR.R_3		-1.86696	-0.0180966	1.78868	6.44271	5.04149	2.53892	0.0388904	1.41016	4.7065	6.63691	-0.563006	-0.359361	0.463265	2.66348	1.1868	-0.27023	0.210274	0.677214	1.34639	0.911791
ABR	R.ISQNFLSSINEDIDPR.R_2		1.81462	-2.06105	-1.21778	0.891622	1.00779	0.700816	0.314974	0.501725	1.35481	0.679742	-0.563006	-0.359361	0.463265	2.66348	1.1868	-0.27023	0.210274	0.677214	1.34639	0.911791
ABR	R.STLVLHDLLK.H_2		-0.938105	0.560497	0.903317	2.45447	0.704431	0.620058	0.257977	0.58842	1.08442	0.638092	-0.563006	-0.359361	0.463265	2.66348	1.1868	-0.27023	0.210274	0.677214	1.34639	0.911791
ABRACL	-.[+42.01056]MNVDHEVNLLVEEIHR.L_3		-1.03762	0.721431	0.815114	0.241264	-0.173129	0.355503	0.969828	0.0133052	-0.0250955	-0.000333899	-1.14625	0.535765	0.641756	0.176848	-0.210271	0.282978	0.909059	0.0414078	0.0727611	0.00301288
ABRAXAS2	K.VSSVPNTSQSYAK.V_2		0.956664	-0.424568	-0.185925	-1.47992	-2.15162	-1.35755	0.0225441	1.64697	-1.77842	-2.929	-0.267924	0.144204	0.0887164	-0.911074	-1.34485	-1.05161	0.00387119	2.41216	-1.09084	-2.63128
ABRAXAS2	R.PQAVGSSNYASTSAGLK.Y_2		-1.091	0.940378	0.529003	-1.65946	-1.64149	-2.00875	0.0398398	1.39968	-1.89602	-2.65383	-0.267924	0.144204	0.0887164	-0.911074	-1.34485	-1.05161	0.00387119	2.41216	-1.09084	-2.63128
ACAA1	K.AEELGLPILGVLR.S_2		1.3868	-0.192329	-3.42194	-2.40478	-0.869338	-3.10632	0.425477	0.371124	-1.38432	-0.513755	-0.207889	0.616146	-0.747275	-0.707955	-0.163311	-0.209265	0.598732	0.222767	-0.24717	-0.0550615
ACAA1	K.DTTPDELLSAVM[+15.99492]TAVLK.D_2		-0.196318	0.103497	0.834366	-0.433141	-0.638251	-0.159214	0.122099	0.913287	-0.657383	-0.60038	-0.207889	0.616146	-0.747275	-0.707955	-0.163311	-0.209265	0.598732	0.222767	-0.24717	-0.0550615
ACAA1	K.VNPLGGAVALGHPLGC[+57.02146]TGAR.Q_3		-1.11878	-0.0097428	1.46926	-0.963997	-1.39756	0.733734	0.544628	0.2639	-0.656184	-0.173167	-0.207889	0.616146	-0.747275	-0.707955	-0.163311	-0.209265	0.598732	0.222767	-0.24717	-0.0550615
ACAA1	R.EKQDTFALASQQK.A_2		0.160179	0.516045	-0.0151975	-1.08286	-0.179067	-1.10196	0.042136	1.37535	-1.0083	-1.38677	-0.207889	0.616146	-0.747275	-0.707955	-0.163311	-0.209265	0.598732	0.222767	-0.24717	-0.0550615
ACAA1	R.SITVTQDEGIRPSTTM[+15.99492]EGLAK.L_2		0.590441	0.344459	-0.505883	0.926421		-0.0831851	0.658735	0.181289	0.278612	0.0505094	-0.207889	0.616146	-0.747275	-0.707955		-0.209265	0.570707	0.243587	-0.345604	-0.0841845
ACAA1	R.SKAEELGLPILGVLR.S_3		-1.22522	1.50808	-0.42885	0.86228	1.51631	2.15523	0.155703	0.807702	1.55994	1.25996	-0.207889	0.616146	-0.747275	-0.707955	-0.163311	-0.209265	0.598732	0.222767	-0.24717	-0.0550615
ACAA2	K.VSPETVDSVIM[+15.99492]GNVLQSSSDAIYLAR.H_3		-0.112335	0.267321	0.474229	-0.42418	-0.469267	-2.61966	0.137255	0.862471	-1.38077	-1.19088	0.321979	-0.474114	0.285371	-0.169818	0.644349	-0.90735	0.734019	0.134293	-0.188685	-0.025339
ACAA2	R.TPFGAYGGLLK.D_2		0.769428	-0.539735	0.23948	-0.219128	1.06342	0.55435	0.591908	0.227745	0.309821	0.0705604	0.321979	-0.474114	0.285371	-0.169818	0.644349	-0.90735	0.734019	0.134293	-0.188685	-0.025339
ACACA	K.DVDDGLQAAEEVGYPVM[+15.99492]IK.A_2		-0.821195	-1.99023	2.22882	0.405681	-1.08363	1.53891	0.75969	0.119364	0.481185	0.0574361	-0.667987	-0.52943	1.2529	0.555883	1.03792	-0.399686	0.638998	0.194501	0.379542	0.0738212
ACACA	K.GVISDILDWK.T_2		-3.60375	-2.63923	2.87368	0.306621	3.17784	4.29318	0.187684	0.726574	3.71565	2.69969	-0.667987	-0.52943	1.2529	0.555883	1.03792	-0.399686	0.638998	0.194501	0.379542	0.0738212
ACACA	K.IASSIVAQTAGIPTLPWSGSGLR.V_2		0.990415	-1.20646	0.567524	-0.0368734	-1.03857	-3.98614	0.256155	0.591497	-1.80435	-1.06727	-0.667987	-0.52943	1.2529	0.555883	1.03792	-0.399686	0.638998	0.194501	0.379542	0.0738212
ACACA	K.IIQQAGQVWFPDSAFK.T_2		-0.794207	0.881475	0.382249	-0.0326064	1.03467	0.412583	0.618927	0.208361	0.315044	0.0656428	-0.667987	-0.52943	1.2529	0.555883	1.03792	-0.399686	0.638998	0.194501	0.379542	0.0738212
ACACA	K.IIQQAGQVWFPDSAFK.T_3		0.259404	0.4497	-0.752424	-0.307647	-0.145122	-0.402903	0.51606	0.2873	-0.270784	-0.0777962	-0.667987	-0.52943	1.2529	0.555883	1.03792	-0.399686	0.638998	0.194501	0.379542	0.0738212
ACACA	K.QVN[+0.98402]YEVDR.R_1			2.0332	4.75728	-2.18514	-2.59611	-1.51583	0.015189	1.81847	-5.49427	-9.99117		-0.52943	1.2529	0.555883	1.03792	-0.399686	0.968963	0.0136928	0.036301	0.000497064
ACACA	K.RPGAALDPGC[+57.02146]VLAK.M_2		1.11172	-0.770908	-0.157734	1.91391	0.953351	-0.847217	0.566321	0.246937	0.612319	0.151205	-0.667987	-0.52943	1.2529	0.555883	1.03792	-0.399686	0.638998	0.194501	0.379542	0.0738212
ACACA	R.AIRFVVMVTPEDLK.A_2		0.710735	0.309076	-0.756111	0.491693	-0.621985	-0.749221	0.55288	0.257369	-0.381071	-0.098076	-0.667987	-0.52943	1.2529	0.555883	1.03792	-0.399686	0.638998	0.194501	0.379542	0.0738212
ACACA	R.AYIAYELNSVQHR.Q_2		-0.0994664	0.433105	0.359682	-0.0293894	-0.420234	-0.367121	0.0716317	1.14489	-0.503355	-0.576289	-0.667987	-0.52943	1.2529	0.555883	1.03792	-0.399686	0.638998	0.194501	0.379542	0.0738212
ACACA	R.EVFFM[+15.99492]NTQSIVQLVQR.Y_2		1.20638	-0.288376	-1.08556	-2.29969	-1.57081	-1.8798	0.0574218	1.24092	-1.86091	-2.30925	-0.667987	-0.52943	1.2529	0.555883	1.03792	-0.399686	0.638998	0.194501	0.379542	0.0738212
ACACA	R.LFLTNESGYYLDISLYKEVTDSR.T_4		-0.442484	0.628796	0.474983	2.93921	3.06557	2.20947	0.00416767	2.38011	2.51765	5.99228	-0.667987	-0.52943	1.2529	0.555883	1.03792	-0.399686	0.638998	0.194501	0.379542	0.0738212
ACACA	R.TIQVENSHLILTGAGALNK.V_2		2.47487				7.60612	11.4441	#DIV/0!	#DIV/0!	7.05026	#DIV/0!	-0.667987				1.03792	-0.399686	#DIV/0!	#DIV/0!	0.987103	#DIV/0!
ACACA	R.TIQVENSHLILTGAGALNK.V_3		-1.93744	1.88059	-0.81917	2.6407	3.08067	1.38259	0.098943	1.00461	2.65999	2.67227	-0.667987	-0.52943	1.2529	0.555883	1.03792	-0.399686	0.638998	0.194501	0.379542	0.0738212
ACACA	R.TVELSIPADPANLDSEAK.I_2		0.666667	-0.45471	0.306868	8.15272	6.94078	0.403986	0.109013	0.962523	4.99289	4.80577	-0.667987	-0.52943	1.2529	0.555883	1.03792	-0.399686	0.638998	0.194501	0.379542	0.0738212
ACAD9	K.IPVENILGEVGDGFK.V_2		0.915551	0.692144	-3.67945	-0.0645906	-0.356558	-3.22499	0.785577	0.104811	-0.524796	-0.0550045	1.09145	1.9034	-1.8969	-0.82873	-0.205715	-1.73696	0.356331	0.448146	-1.28978	-0.578012
ACAD9	K.VSTVM[+15.99492]DTVGR.R_2		-4.25671	1.75385	0.0539554	-2.52494	-1.24149	-0.813492	0.722134	0.141382	-0.710338	-0.100429	1.09145	1.9034	-1.8969	-0.82873	-0.205715	-1.73696	0.356331	0.448146	-1.28978	-0.578012
ACADM	K.ANWYFLLAR.S_2		0.476419	-1.44741	1.1983	0.300167	0.396861	0.643999	0.665286	0.176992	0.371237	0.065706	0.226332	-1.70093	0.538609	1.07175	-2.36617	1.05389	0.871099	0.0599326	0.231819	0.0138935
ACADM	K.IYQIYEGTSQIQR.L_2		-3.28427	1.74744	-0.0354423	0.998487	0.481555	3.39356	0.280796	0.551609	2.14863	1.1852	0.226332	-1.70093	0.538609	1.07175	-2.36617	1.05389	0.871099	0.0599326	0.231819	0.0138935
ACADM	K.TGEYPVPLIR.R_2		0.743182	0.360806	-0.856303	-1.65353	-3.84996	-1.5516	0.0524	1.28067	-2.43426	-3.11748	0.226332	-1.70093	0.538609	1.07175	-2.36617	1.05389	0.871099	0.0599326	0.231819	0.0138935
ACADM	K.TRPVVAAGAVGLAQR.A_2		0.689945	-1.97823	1.09477	-2.01824	-4.57715	-5.6784	0.0500408	1.30068	-4.02676	-5.23751	0.226332	-1.70093	0.538609	1.07175	-2.36617	1.05389	0.871099	0.0599326	0.231819	0.0138935
ACADM	R.GIVFEDVK.V_1		1.73207	-3.56318	-0.219487	4.73267		1.35786	0.212123	0.673413	3.7288	2.51102	0.226332	-1.70093	0.538609	1.07175		1.05389	0.225686	0.646494	1.37481	0.88881
ACADSB	K.GITSFLVDR.D_2		1.14939	-0.392483	-0.725102	0.750992	0.357263	1.14503	0.298727	0.524725	0.740495	0.388556	2.07339	-0.461293	-0.145049	0.396645	0.0333265	3.65581	0.566967	0.246442	0.87291	0.215122
ACADSB	K.IGTIYEGASNIQLNTIAK.H_2		3.58322		1.96487			9.34008	#DIV/0!	#DIV/0!	6.56603	#DIV/0!	2.07339		-0.145049			3.65581	#DIV/0!	#DIV/0!	2.69164	#DIV/0!
ACADVL	K.ASNTAEVFFDGVR.V_2		0.680383	0.107423	-0.283544	0.560365	-0.608363	0.0270692	0.710249	0.148589	-0.175063	-0.0260125	1.66713	-0.930858	-0.912397	0.723866	-0.0910384	-0.60229	0.94541	0.0243796	0.0688879	0.00167946
ACADVL	K.GIVNEQFLLQR.L_2		-0.562015	0.988491	0.0731121	0.718777	0.275325	0.332589	0.589801	0.229295	0.275701	0.0632168	1.66713	-0.930858	-0.912397	0.723866	-0.0910384	-0.60229	0.94541	0.0243796	0.0688879	0.00167946
ACADVL	K.GQLTTDQVFPYPSVLNEEQTQFLK.E_2		-2.5248	-0.575805	2.77959	-0.0127069	0.75676	1.87127	0.583383	0.234047	0.978777	0.229079	1.66713	-0.930858	-0.912397	0.723866	-0.0910384	-0.60229	0.94541	0.0243796	0.0688879	0.00167946
ACADVL	K.IHNFGLIQEK.L_2		0.745605	-0.792924	0.494961	-0.588457	-0.934088	-0.115614	0.261597	0.582368	-0.695267	-0.404901	1.66713	-0.930858	-0.912397	0.723866	-0.0910384	-0.60229	0.94541	0.0243796	0.0688879	0.00167946
ACADVL	K.KGIVNEQFLLQR.L_2		2.07431	-4.14001	-1.27705	-1.44866	-2.22511	-2.38809	0.644438	0.190819	-0.906375	-0.172953	1.66713	-0.930858	-0.912397	0.723866	-0.0910384	-0.60229	0.94541	0.0243796	0.0688879	0.00167946
ACADVL	K.NPFGNAGLLLGEAGK.Q_2		0.866506	-0.36775	-0.0841821	-0.607491	-0.701403	-1.1185	0.0794275	1.10003	-0.947324	-1.04208	1.66713	-0.930858	-0.912397	0.723866	-0.0910384	-0.60229	0.94541	0.0243796	0.0688879	0.00167946
ACADVL	K.TPVTDPATGAVK.E_2		0.811914	-0.0327274	-0.384743	-0.510364	-0.768068	-0.212013	0.182223	0.739398	-0.628296	-0.464561	1.66713	-0.930858	-0.912397	0.723866	-0.0910384	-0.60229	0.94541	0.0243796	0.0688879	0.00167946
ACADVL	K.YYTLN[+0.98402]GSK.L_1		-4.02425	2.43294	-2.72708	-3.74136	-2.87097	-2.98691	0.426544	0.370037	-1.76029	-0.65137	1.66713	-0.930858	-0.912397	0.723866	-0.0910384	-0.60229	0.94541	0.0243796	0.0688879	0.00167946
ACADVL	R.AGLGSGLSLSGLVHPELSR.S_2		1.26251	0.0546454	-2.9259	0.459772	0.862839	-5.01783	0.77446	0.111001	-0.695492	-0.0772003	1.66713	-0.930858	-0.912397	0.723866	-0.0910384	-0.60229	0.94541	0.0243796	0.0688879	0.00167946
ACADVL	R.AGLGSGLSLSGLVHPELSR.S_3		1.52427	-2.11835	-0.124669	-0.456619	-0.903089	-2.70342	0.425331	0.371273	-1.11479	-0.413892	1.66713	-0.930858	-0.912397	0.723866	-0.0910384	-0.60229	0.94541	0.0243796	0.0688879	0.00167946
ACADVL	R.ALEQFATVVEAK.L_2		0.572538	-0.111905	0.168561	5.28561	4.89984	1.6513	0.0330797	1.48044	3.73585	5.5307	1.66713	-0.930858	-0.912397	0.723866	-0.0910384	-0.60229	0.94541	0.0243796	0.0688879	0.00167946
ACADVL	R.GFGGITHGPPEK.K_2		0.998491	0.164818	-1.21198	2.00652	0.765368	0.338797	0.26631	0.574613	1.05312	0.605135	1.66713	-0.930858	-0.912397	0.723866	-0.0910384	-0.60229	0.94541	0.0243796	0.0688879	0.00167946
ACADVL	R.VPSENVLGEVGSGFK.V_2		0.870327	-0.62428	0.146098	0.773809	-0.413493	1.42908	0.537047	0.269988	0.465749	0.125747	1.66713	-0.930858	-0.912397	0.723866	-0.0910384	-0.60229	0.94541	0.0243796	0.0688879	0.00167946
ACAT1	K.EAYM[+15.99492]GNVLQGGEGQAPTR.Q_2		0.608489	-1.14829	0.85247	-4.14056	-3.44793	-1.71355	0.0287108	1.54195	-3.2049	-4.94181	-0.746467	0.693489	-0.684247	0.164555	-0.306439	0.38968	0.556792	0.254307	0.32834	0.0834993
ACAT1	K.FGNEVIPVTVTVK.G_2		-0.378455	-0.253762	1.21988	0.424358	-1.38655	-0.879447	0.337919	0.471187	-0.809768	-0.381552	-0.746467	0.693489	-0.684247	0.164555	-0.306439	0.38968	0.556792	0.254307	0.32834	0.0834993
ACAT1	K.GQPDVVVKEDEEYKR.V_2		0.536281	0.521178	-0.69304	-0.32449	0.164526	-0.0216155	0.694858	0.158104	-0.181999	-0.0287748	-0.746467	0.693489	-0.684247	0.164555	-0.306439	0.38968	0.556792	0.254307	0.32834	0.0834993
ACAT1	K.GQPDVVVKEDEEYKR.V_3		0.525473	0.228995	-0.150231	0.10924	0.81165	-0.492992	0.896606	0.0473982	-0.0587798	-0.00278605	-0.746467	0.693489	-0.684247	0.164555	-0.306439	0.38968	0.556792	0.254307	0.32834	0.0834993
ACAT1	K.RLNVTPLAR.I_2		0.716487	-0.00807809	-0.187578	-0.8786	-0.700283	0.0881198	0.173709	0.760178	-0.670531	-0.509723	-0.746467	0.693489	-0.684247	0.164555	-0.306439	0.38968	0.556792	0.254307	0.32834	0.0834993
ACAT1	K.VNIN[+0.98402]GGAVSLGHPIGM[+15.99492]SGAR.I_2		-0.661155	1.7352	-1.87744		-1.69716	0.684036	0.892986	0.0491555	-0.238764	-0.0117365	-0.746467	0.693489	-0.684247		-0.306439	0.38968	0.692634	0.159496	0.287362	0.0458332
ACAT1	K.VNIN[+0.98402]GGAVSLGHPIGM[+15.99492]SGAR.I_3		-1.86518	1.39062	0.279808	3.13434	3.56658	0.426637	0.14954	0.825244	2.44077	2.01423	-0.746467	0.693489	-0.684247	0.164555	-0.306439	0.38968	0.556792	0.254307	0.32834	0.0834993
ACAT1	R.IVAFADAAVEPIDFPIAPVYAASM[+15.99492]VLK.D_3		-1.42068	1.41343	-0.0857758	-0.350624	0.687032	1.47097	0.550859	0.25896	0.633471	0.164043	-0.746467	0.693489	-0.684247	0.164555	-0.306439	0.38968	0.556792	0.254307	0.32834	0.0834993
ACAT1	R.IVAFADAAVEPIDFPIAPVYAASMVLK.D_3		-0.686159	1.07339	-0.244833	1.68525	0.0735336	2.79332	0.196776	0.706028	1.46991	1.03779	-0.746467	0.693489	-0.684247	0.164555	-0.306439	0.38968	0.556792	0.254307	0.32834	0.0834993
ACAT1	R.IVGHLTHALK.Q_2		2.30133	-6.88163	-4.43407	-12.4803	-10.2514	-10.3828	0.0473564	1.32462	-8.0334	-10.6412	-0.746467	0.693489	-0.684247	0.164555	-0.306439	0.38968	0.556792	0.254307	0.32834	0.0834993
ACAT1	R.NEQDAYAINSYTR.S_2		-1.56105	0.279261	1.38722	0.152552	0.339247	-0.0442135	0.901684	0.0449456	0.114049	0.00512601	-0.746467	0.693489	-0.684247	0.164555	-0.306439	0.38968	0.556792	0.254307	0.32834	0.0834993
ACAT1	R.QAVLGAGLPISTPC[+57.02146]TTINK.V_2		0.86386	-0.260742	-0.222737	1.3602	0.825528	0.146872	0.270314	0.568131	0.65074	0.369706	-0.746467	0.693489	-0.684247	0.164555	-0.306439	0.38968	0.556792	0.254307	0.32834	0.0834993
ACAT1	R.TPIGSFLGSLSLLPATK.L_2		0.747211	0.141781	-0.550921	-0.859299	-1.0231	-0.735202	0.0623396	1.20524	-0.985225	-1.18743	-0.746467	0.693489	-0.684247	0.164555	-0.306439	0.38968	0.556792	0.254307	0.32834	0.0834993
ACAT1	R.TPIGSFLGSLSLLPATK.L_3		-0.329565	0.377927	0.611345	0.772888	0.195295	0.675145	0.382463	0.41741	0.327873	0.136858	-0.746467	0.693489	-0.684247	0.164555	-0.306439	0.38968	0.556792	0.254307	0.32834	0.0834993
ACAT2	K.EIVPVLVSTR.K_2		1.06922	0.222854	-1.6955	3.94323	3.02575	-0.318962	0.199601	0.699836	2.35115	1.64542	0.108981	0.830357	-1.2142	0.559068	0.948395	-0.4243	0.566089	0.247115	0.452674	0.111863
ACAT2	K.VNIEGGAIALGHPLGASGC[+57.02146]R.I_3		-0.616319	0.398493	0.85082	1.29268	2.45663	1.82101	0.0400261	1.39766	1.64578	2.30023	0.108981	0.830357	-1.2142	0.559068	0.948395	-0.4243	0.566089	0.247115	0.452674	0.111863
ACAT2	R.ATVAPEDVSEVIFGHVLAAGC[+57.02146]GQNPVR.Q_3		0.805135	0.49862	-2.08708	-1.812	-2.1175	-2.21282	0.125706	0.900644	-1.78633	-1.60885	0.108981	0.830357	-1.2142	0.559068	0.948395	-0.4243	0.566089	0.247115	0.452674	0.111863
ACAT2	R.ILVTLLHTLER.M_2		-0.0739984	1.04617	-0.767416	1.59461	2.55335	1.97413	0.0298818	1.52459	1.97244	3.00717	0.108981	0.830357	-1.2142	0.559068	0.948395	-0.4243	0.566089	0.247115	0.452674	0.111863
ACAT2	R.IVSWSQVGVEPSIM[+15.99492]GIGPIPAIK.Q_2		0.986731	-0.455602	-1.1897	1.0862	0.406664	0.814627	0.213559	0.670483	0.988688	0.662898	0.108981	0.830357	-1.2142	0.559068	0.948395	-0.4243	0.566089	0.247115	0.452674	0.111863
ACAT2	R.IVSWSQVGVEPSIM[+15.99492]GIGPIPAIK.Q_3		-0.0673405	0.753394	-0.373596	-1.15386	0.00933769	-2.37757	0.170887	0.767292	-1.27818	-0.98074	0.108981	0.830357	-1.2142	0.559068	0.948395	-0.4243	0.566089	0.247115	0.452674	0.111863
ACAT2	R.TIIGSFN[+0.98402]GALAAVPVQDLGSTVIK.E_2		-0.429564	0.0930839	1.00516	-3.33887	-2.87274	-2.33224	0.00383913	2.41577	-3.07084	-7.41844	0.108981	0.830357	-1.2142	0.559068	0.948395	-0.4243	0.566089	0.247115	0.452674	0.111863
ACAT2	R.TIIGSFN[+0.98402]GALAAVPVQDLGSTVIK.E_3		-0.302205	0.820618	-0.0786311	1.09071	0.462426	1.64119	0.130341	0.88492	0.918182	0.812518	0.108981	0.830357	-1.2142	0.559068	0.948395	-0.4243	0.566089	0.247115	0.452674	0.111863
ACBD3	K.ESLPVIAAPSM[+15.99492]WTR.P_2		0.312626	0.85094	-0.898979	-1.06349	-1.36927	-1.42106	0.0604723	1.21844	-1.3728	-1.67268	0.378063	0.297579	0.0444125	0.121717	-0.116346	-0.328757	0.10187	0.991955	-0.347813	-0.345015
ACBD3	K.IQQDADSVITVGR.G_2		1.09513	-0.316102	-0.609839	1.18903	-1.08613	-1.24592	0.667916	0.175278	-0.4374	-0.0766666	0.378063	0.297579	0.0444125	0.121717	-0.116346	-0.328757	0.10187	0.991955	-0.347813	-0.345015
ACBD3	K.N[+0.98402]ANKPLLDEIVPVYR.R_2		-1.09223	1.37883	-0.171346	-0.403963	-0.103966	-0.512671	0.631953	0.199315	-0.378621	-0.0754648	0.378063	0.297579	0.0444125	0.121717	-0.116346	-0.328757	0.10187	0.991955	-0.347813	-0.345015
ACBD3	K.NAN[+0.98402]KPLLDEIVPVYR.R_2		-0.355956	1.0493	-0.232518	-1.37675	-1.46919	-1.30289	0.0272585	1.5645	-1.53655	-2.40393	0.378063	0.297579	0.0444125	0.121717	-0.116346	-0.328757	0.10187	0.991955	-0.347813	-0.345015
ACBD3	K.NANKPLLDEIVPVYR.R_2		-0.355546	0.861652	0.0611143	-1.1347	-1.22879	-0.980841	0.0232056	1.63441	-1.30385	-2.13102	0.378063	0.297579	0.0444125	0.121717	-0.116346	-0.328757	0.10187	0.991955	-0.347813	-0.345015
ACBD3	K.NANKPLLDEIVPVYR.R_3		0.795704	-0.0986108	-0.245711	0.897032	0.0617604	-0.278763	0.880892	0.0550775	0.0762158	0.00419778	0.378063	0.297579	0.0444125	0.121717	-0.116346	-0.328757	0.10187	0.991955	-0.347813	-0.345015
ACBD3	K.QQEVVVAGSSLPTSSK.V_2		0.864563	-5.36041	1.11224	2.94308	3.66668	2.49619	0.124221	0.905805	4.16319	3.77103	0.378063	0.297579	0.0444125	0.121717	-0.116346	-0.328757	0.10187	0.991955	-0.347813	-0.345015
ACBD3	K.THTDSSEKELEPEAAEEALEN[+0.98402]GPK.E_3		0.3009	-0.600841	0.903172	0.520862	1.06294	1.96024	0.181017	0.742281	0.98027	0.727636	0.378063	0.297579	0.0444125	0.121717	-0.116346	-0.328757	0.10187	0.991955	-0.347813	-0.345015
ACBD3	K.VNATVPSNM[+15.99492]M[+15.99492]SVN[+0.98402]GQAK.T_2		1.09061	-2.98526	0.792781	0.715749	0.919704	-0.00518217	0.534456	0.272088	0.910714	0.247794	0.378063	0.297579	0.0444125	0.121717	-0.116346	-0.328757	0.10187	0.991955	-0.347813	-0.345015
ACBD3	R.GPGASGEQPEPGEAAAGGAAEEAR.R_2		0.280409	0.747281	-0.662308	-0.462225	-0.0528695	-0.77048	0.301021	0.521403	-0.550319	-0.286938	0.378063	0.297579	0.0444125	0.121717	-0.116346	-0.328757	0.10187	0.991955	-0.347813	-0.345015
ACBD3	R.QLQEQHYQQYM[+15.99492]QQLYQVQLAQQQAALQK.Q_3			4.6024					#DIV/0!	#DIV/0!	#DIV/0!	#DIV/0!		0.297579					#DIV/0!	#DIV/0!	#DIV/0!	#DIV/0!
ACBD3	R.WGFGLEELYGLALR.F_2		-0.407416	0.534046	0.522082	-2.10562	-1.79476	-0.396796	0.0542117	1.26591	-1.64863	-2.08701	0.378063	0.297579	0.0444125	0.121717	-0.116346	-0.328757	0.10187	0.991955	-0.347813	-0.345015
ACIN1	K.AAPC[+57.02146]IYWLPLTDSQIVQK.E_3		-0.902148	-0.910227	2.07382	-0.118561	-0.14219	1.90052	0.721753	0.141611	0.459441	0.0650619	-1.31839	-0.179199	1.44451	-1.19433	-0.95898	1.53875	0.882284	0.0543914	-0.187159	-0.0101798
ACIN1	K.GVPAGN[+0.98402]SDTEGGQPGR.K_2		-0.571047	-0.465795	1.41485	-4.9497	-4.36656	-0.598451	0.0853228	1.06893	-3.4309	-3.66741	-1.31839	-0.179199	1.44451	-1.19433	-0.95898	1.53875	0.882284	0.0543914	-0.187159	-0.0101798
ACIN1	K.KPSISITTESLK.S_2		-0.734035	1.27716	-0.28799	2.31282	2.26734	1.46494	0.0448108	1.34862	1.92999	2.60281	-1.31839	-0.179199	1.44451	-1.19433	-0.95898	1.53875	0.882284	0.0543914	-0.187159	-0.0101798
ACLY	K.AFDSGIIPM[+15.99492]EFVNK.M_2		0.62992	0.0540509	-0.169834	-0.362125	-0.21565	0.0164559	0.24375	0.613055	-0.358485	-0.219771	-0.0195926	-0.583031	0.756532	0.50927	0.0433698	0.717034	0.442115	0.354465	0.371922	0.131833
ACLY	K.AIVWGM[+15.99492]QTR.A_2		0.738516	-0.916859	0.556441	-0.135907	-1.29002	0.2806	0.510517	0.29199	-0.507808	-0.148275	-0.0195926	-0.583031	0.756532	0.50927	0.0433698	0.717034	0.442115	0.354465	0.371922	0.131833
ACLY	K.AKPAM[+15.99492]PQDSVPSPR.S_2		-4.18262	0.146938	1.74498	0.196585	0.408752	1.94928	0.43302	0.363492	1.61511	0.587079	-0.0195926	-0.583031	0.756532	0.50927	0.0433698	0.717034	0.442115	0.354465	0.371922	0.131833
ACLY	K.DLVSSLTSGLLTIGDR.F_2		-0.15191	0.756242	-0.066663	-0.553408	-1.62434	0.597607	0.372646	0.428703	-0.705937	-0.302637	-0.0195926	-0.583031	0.756532	0.50927	0.0433698	0.717034	0.442115	0.354465	0.371922	0.131833
ACLY	K.DLVSSLTSGLLTIGDR.F_3		0.205931	0.308023	-0.20452	-0.280766	-0.172335	1.40536	0.724666	0.139862	0.214276	0.0299692	-0.0195926	-0.583031	0.756532	0.50927	0.0433698	0.717034	0.442115	0.354465	0.371922	0.131833
ACLY	K.EHEVTIFVR.R_2		1.21021	-1.72599	0.274619	0.330982	0.699786	1.37848	0.390693	0.408164	0.883469	0.3606	-0.0195926	-0.583031	0.756532	0.50927	0.0433698	0.717034	0.442115	0.354465	0.371922	0.131833
ACLY	K.FIC[+57.02146]TTSAIQNR.F_2		-1.64685	-0.082626	1.66042	0.347284	0.0420497	0.601733	0.733762	0.134445	0.353372	0.0475091	-0.0195926	-0.583031	0.756532	0.50927	0.0433698	0.717034	0.442115	0.354465	0.371922	0.131833
ACLY	K.FYWGHKEILIPVFK.N_3		-0.333634	-0.463591	1.30182	5.9208	5.08728	8.901	0.00740541	2.13045	6.46816	13.7801	-0.0195926	-0.583031	0.756532	0.50927	0.0433698	0.717034	0.442115	0.354465	0.371922	0.131833
ACLY	K.GVTIIGPATVGGIK.P_2		0.341223	-0.500459	0.799433	-1.02063	-1.32032	-1.02095	0.0275313	1.56017	-1.33404	-2.08133	-0.0195926	-0.583031	0.756532	0.50927	0.0433698	0.717034	0.442115	0.354465	0.371922	0.131833
ACLY	K.GVTIIGPATVGGIKPGC[+57.02146]FK.I_2		-0.761089	-0.867451	1.74318	-0.545237	-0.240269	-0.469513	0.62281	0.205645	-0.456554	-0.0938878	-0.0195926	-0.583031	0.756532	0.50927	0.0433698	0.717034	0.442115	0.354465	0.371922	0.131833
ACLY	K.GVTIIGPATVGGIKPGC[+57.02146]FK.I_3		1.53449	-0.836294	-1.36919	-2.66201	-2.69722	-1.99292	0.0729932	1.13672	-2.22705	-2.53153	-0.0195926	-0.583031	0.756532	0.50927	0.0433698	0.717034	0.442115	0.354465	0.371922	0.131833
ACLY	K.IGNTGGM[+15.99492]LDNILASK.L_2		1.03054	-2.48502	0.821942	-0.321939	-0.490777	-0.562185	0.838903	0.0762881	-0.247457	-0.018878	-0.0195926	-0.583031	0.756532	0.50927	0.0433698	0.717034	0.442115	0.354465	0.371922	0.131833
ACLY	K.ILIIGGSIANFTNVAATFK.G_2		-0.301095	0.509578	0.429566	-0.958331	-0.803819	-0.651181	0.0203095	1.6923	-1.01713	-1.72129	-0.0195926	-0.583031	0.756532	0.50927	0.0433698	0.717034	0.442115	0.354465	0.371922	0.131833
ACLY	K.LGLVGVNLTLDGVK.S_2		0.745064	0.770907	-2.92872	-1.19072	-2.259	-3.64929	0.252894	0.597062	-1.89542	-1.13168	-0.0195926	-0.583031	0.756532	0.50927	0.0433698	0.717034	0.442115	0.354465	0.371922	0.131833
ACLY	K.LNPEDIK.K_1		0.291245	-0.170041	0.593434	-0.917903	-1.85518	-0.846693	0.0213649	1.6703	-1.4448	-2.41325	-0.0195926	-0.583031	0.756532	0.50927	0.0433698	0.717034	0.442115	0.354465	0.371922	0.131833
ACLY	K.LYRPGSVAYVSR.S_2		0.986686	-1.24264	0.398337	-0.438004	-0.166932	1.10714	0.890739	0.0502496	0.119941	0.00602699	-0.0195926	-0.583031	0.756532	0.50927	0.0433698	0.717034	0.442115	0.354465	0.371922	0.131833
ACLY	K.M[+15.99492]IVVLGEIGGTEEYK.I_2		-0.0692752	0.343138	0.324114	0.684989	0.480484	0.688487	0.0501776	1.29949	0.418661	0.544046	-0.0195926	-0.583031	0.756532	0.50927	0.0433698	0.717034	0.442115	0.354465	0.371922	0.131833
ACLY	K.PAM[+15.99492]PQDSVPSPR.S_2		-2.81361	1.58332	0.238465	0.0361173	0.787806	0.751598	0.55315	0.257157	0.855783	0.220071	-0.0195926	-0.583031	0.756532	0.50927	0.0433698	0.717034	0.442115	0.354465	0.371922	0.131833
ACLY	K.WGDIEFPPPFGR.E_2		0.269121	-0.621949	0.946881	1.8621	0.0409583	0.61774	0.413017	0.384032	0.642248	0.246644	-0.0195926	-0.583031	0.756532	0.50927	0.0433698	0.717034	0.442115	0.354465	0.371922	0.131833
ACLY	R.AVQGMLDFDYVC[+57.02146]SR.D_2		2.07587		3.31284	2.49199	1.22901	3.1958	0.686669	0.163253	-0.388755	-0.0634652	-0.0195926		0.756532	0.50927	0.0433698	0.717034	0.896456	0.0474709	0.054755	0.00259927
ACLY	R.EAYPEEAYIADLDAK.S_2		-0.420946	0.484254	0.602581	-0.993744	-1.67732	-0.508567	0.0520945	1.28321	-1.28184	-1.64487	-0.0195926	-0.583031	0.756532	0.50927	0.0433698	0.717034	0.442115	0.354465	0.371922	0.131833
ACLY	R.EGDYVLFHHEGGVDVGDVDAK.A_3		-0.61905	1.46471	-0.890465	0.926802	2.17003	2.46364	0.101124	0.995147	1.86843	1.85936	-0.0195926	-0.583031	0.756532	0.50927	0.0433698	0.717034	0.442115	0.354465	0.371922	0.131833
ACLY	R.ELGLIR.K_1		-0.136715	-0.80491	1.36488	-2.87498	-3.44744	-3.39049	0.00714944	2.14573	-3.37872	-7.24981	-0.0195926	-0.583031	0.756532	0.50927	0.0433698	0.717034	0.442115	0.354465	0.371922	0.131833
ACLY	R.GGPNYQEGLR.V_2		0.444425	-0.198052	0.404648	-1.6888	-1.38911	-0.484226	0.0282014	1.54973	-1.40438	-2.17641	-0.0195926	-0.583031	0.756532	0.50927	0.0433698	0.717034	0.442115	0.354465	0.371922	0.131833
ACLY	R.GQELIYAGMPITEVFK.E_2		-0.804723	0.828083	0.457862	-0.570561	-0.91388	-0.417761	0.198175	0.70295	-0.794475	-0.558476	-0.0195926	-0.583031	0.756532	0.50927	0.0433698	0.717034	0.442115	0.354465	0.371922	0.131833
ACLY	R.KHPEVDVLIN[+0.98402]FASLR.S_3		-0.672991	1.40894	-0.650127	0.945409	1.10895	0.0228771	0.436464	0.360051	0.663804	0.239003	-0.0195926	-0.583031	0.756532	0.50927	0.0433698	0.717034	0.442115	0.354465	0.371922	0.131833
ACLY	R.LLQDHPWLLSQNLVVKPDQLIK.R_3		1.03958	0.0370659	-1.31713	2.51012	3.09876	1.15677	0.0590302	1.22893	2.33538	2.87001	-0.0195926	-0.583031	0.756532	0.50927	0.0433698	0.717034	0.442115	0.354465	0.371922	0.131833
ACLY	R.LLQDHPWLLSQNLVVKPDQLIK.R_4		0.543562	-0.490602	0.49949	2.41277	1.94995	1.59432	0.0119892	1.92121	1.80153	3.46112	-0.0195926	-0.583031	0.756532	0.50927	0.0433698	0.717034	0.442115	0.354465	0.371922	0.131833
ACLY	R.QHFPATPLLDYALEVEK.I_2		0.978218	-0.295372	-0.475304	0.349776	0.64747	1.79897	0.246405	0.608351	0.862892	0.524941	-0.0195926	-0.583031	0.756532	0.50927	0.0433698	0.717034	0.442115	0.354465	0.371922	0.131833
ACLY	R.QHFPATPLLDYALEVEK.I_3		0.0721633	-0.346798	0.90416	-0.154591	0.24715	0.549855	0.992336	0.00334105	0.00429621	1.43538e-05	-0.0195926	-0.583031	0.756532	0.50927	0.0433698	0.717034	0.442115	0.354465	0.371922	0.131833
ACLY	R.SAYDSTM[+15.99492]ETM[+15.99492]NYAQIR.T_2		0.0724778	0.416668	0.176499	-2.67872	-10.2926	-1.48732	0.141779	0.848388	-5.04144	-4.2771	-0.0195926	-0.583031	0.756532	0.50927	0.0433698	0.717034	0.442115	0.354465	0.371922	0.131833
ACLY	R.SGGM[+15.99492]SNELN[+0.98402]NIISR.T_2		0.484581	-0.25514	0.396503	0.971448	0.762712	0.181875	0.264917	0.576891	0.43003	0.24808	-0.0195926	-0.583031	0.756532	0.50927	0.0433698	0.717034	0.442115	0.354465	0.371922	0.131833
ACLY	R.SGGM[+15.99492]SNELNNIISR.T_2		0.763165	-0.149834	-0.110507	3.46845	4.19323	1.63078	0.0232011	1.63449	2.92988	4.78886	-0.0195926	-0.583031	0.756532	0.50927	0.0433698	0.717034	0.442115	0.354465	0.371922	0.131833
ACLY	R.SM[+15.99492]GFIGHYLDQK.R_2		-0.0923088	0.523531	0.222475	1.71833	1.19387	1.3588	0.00691322	2.16032	1.20577	2.60484	-0.0195926	-0.583031	0.756532	0.50927	0.0433698	0.717034	0.442115	0.354465	0.371922	0.131833
ACLY	R.TIAIIAEGIPEALTR.K_2		-0.532431	0.420855	0.739267	0.0686966	0.0293448	0.572189	0.974692	0.0111324	0.0141798	0.000157855	-0.0195926	-0.583031	0.756532	0.50927	0.0433698	0.717034	0.442115	0.354465	0.371922	0.131833
ACLY	R.TTDGVYEGVAIGGDR.Y_2		0.123423	0.117655	0.495698	2.6986	2.5535	1.24636	0.0159404	1.7975	1.92056	3.45221	-0.0195926	-0.583031	0.756532	0.50927	0.0433698	0.717034	0.442115	0.354465	0.371922	0.131833
ACO1	K.FVEFFGPGVAQLSIADR.A_2		-0.2093	0.975404	-0.682355	0.595462	1.13228	0.528084	0.24278	0.614786	0.724026	0.445121	0.585446	-0.454945	-0.589169	1.77992	1.08731	-0.69688	0.348471	0.457834	0.876339	0.401218
ACO1	K.KQDIENILHWNVTQHK.N_4		1.50785	-1.83382	-0.258287	4.45053	3.44454	1.65428	0.0557924	1.25342	3.37787	4.2339	0.585446	-0.454945	-0.589169	1.77992	1.08731	-0.69688	0.348471	0.457834	0.876339	0.401218
ACO1	K.SPPFFENLTLDLQPPK.S_2		1.64979	-1.33605	-1.2292	3.51933	2.07882	0.586749	0.141269	0.849954	2.36679	2.01166	0.585446	-0.454945	-0.589169	1.77992	1.08731	-0.69688	0.348471	0.457834	0.876339	0.401218
ACO1	M.[+42.01056]SNPFAHLAEPLDPVQPGK.K_2		-0.362865	0.127727	0.906642	3.39806	2.03902	1.7322	0.0265228	1.57638	2.16592	3.41432	0.585446	-0.454945	-0.589169	1.77992	1.08731	-0.69688	0.348471	0.457834	0.876339	0.401218
ACO1	R.VILQDFTGVPAVVDFAAM[+15.99492]R.D_2		-0.0378761	-0.14553	0.89445	-1.5043	-0.269802	-3.36804	0.111679	0.952027	-1.95106	-1.85746	0.585446	-0.454945	-0.589169	1.77992	1.08731	-0.69688	0.348471	0.457834	0.876339	0.401218
ACO1	R.VILQDFTGVPAVVDFAAMR.D_3		0.0463358	-0.0703615	0.75457	0.0611813	0.0683747	0.561299	0.967619	0.0142955	-0.0132299	-0.000189129	0.585446	-0.454945	-0.589169	1.77992	1.08731	-0.69688	0.348471	0.457834	0.876339	0.401218
ACO1	R.YQQAGLPLIVLAGK.E_2		1.63039	-1.10344	-1.30804	0.736824	-0.852792	0.0352262	0.835403	0.0781037	0.233449	0.0182332	0.585446	-0.454945	-0.589169	1.77992	1.08731	-0.69688	0.348471	0.457834	0.876339	0.401218
ACO1	R.YTIIIPENLKPQM[+15.99492]K.V_3		-1.87325	1.9543	-1.06723	-2.49543	-1.56985	-2.29212	0.209468	0.678883	-1.79041	-1.21548	0.585446	-0.454945	-0.589169	1.77992	1.08731	-0.69688	0.348471	0.457834	0.876339	0.401218
ACO2	K.DINQEVYNFLATAGAK.Y_2		0.727532	-0.0374841	-0.318208	-1.30764	-1.07188	-1.43135	0.0133955	1.87304	-1.39424	-2.61146	-0.167632	-2.46241	1.66729	0.447321	0.596976	0.661915	0.498382	0.302437	0.889652	0.269064
ACO2	K.DSSGQHVDVSPTSQR.L_2		-1.36938	-0.863612	1.99436	-1.16479	-0.737045	0.414386	0.735345	0.133509	-0.416274	-0.0555763	-0.167632	-2.46241	1.66729	0.447321	0.596976	0.661915	0.498382	0.302437	0.889652	0.269064
ACO2	K.DSSGQHVDVSPTSQR.L_3		-3.28911	0.746674	1.363	-2.78208	-0.87018	0.441206	0.715923	0.145134	-0.677206	-0.0982853	-0.167632	-2.46241	1.66729	0.447321	0.596976	0.661915	0.498382	0.302437	0.889652	0.269064
ACO2	K.FNPETDYLTGTDGKK.F_2		1.11574	-1.85312	0.515659	5.66861	7.4025	4.18853	0.0109026	1.96247	5.82712	11.4355	-0.167632	-2.46241	1.66729	0.447321	0.596976	0.661915	0.498382	0.302437	0.889652	0.269064
ACO2	K.FRLEAPDADELPKGEFDPGQDTYQHPPK.D_4				9.50577		6.14284	9.99624	#DIV/0!	#DIV/0!	-1.43623	#DIV/0!			1.66729		0.596976	0.661915	#DIV/0!	#DIV/0!	-1.03785	#DIV/0!
ACO2	K.GEFDPGQDTYQHPPK.D_2		0.563213	-1.88434	1.19329	-2.01043	-1.62712	-1.6454	0.143761	0.842359	-1.71837	-1.44748	-0.167632	-2.46241	1.66729	0.447321	0.596976	0.661915	0.498382	0.302437	0.889652	0.269064
ACO2	K.IVYGHLDDPASQEIER.G_2		0.386453	0.464663	-0.265718	2.25268	3.19331	1.4133	0.0206725	1.68461	2.0913	3.52302	-0.167632	-2.46241	1.66729	0.447321	0.596976	0.661915	0.498382	0.302437	0.889652	0.269064
ACO2	K.QGLLPLTFADPADYNK.I_2		1.54121	-1.41125	-0.618894	-0.931401	-1.03769	-1.97394	0.288877	0.539288	-1.15137	-0.620917	-0.167632	-2.46241	1.66729	0.447321	0.596976	0.661915	0.498382	0.302437	0.889652	0.269064
ACO2	K.VAM[+15.99492]SHFEPNEYIHYDLLEK.N_4		-0.816554	-0.103597	1.39385	2.00106	0.388076	0.322595	0.430574	0.365952	0.746011	0.273005	-0.167632	-2.46241	1.66729	0.447321	0.596976	0.661915	0.498382	0.302437	0.889652	0.269064
ACO2	K.VAVPSTIHC[+57.02146]DHLIEAQVGGEK.D_3		-1.44828	-4.50059	2.60301			1.14003	#DIV/0!	#DIV/0!	2.25531	#DIV/0!	-0.167632	-2.46241	1.66729			0.661915	#DIV/0!	#DIV/0!	0.98283	#DIV/0!
ACO2	R.AKDINQEVYNFLATAGAK.Y_3		0.365259	-0.288118	0.594013	-0.26359	-0.380817	-1.14519	0.0985538	1.00633	-0.820249	-0.825439	-0.167632	-2.46241	1.66729	0.447321	0.596976	0.661915	0.498382	0.302437	0.889652	0.269064
ACO2	R.LQLLEPFDKWDGK.D_3		1.19979	-2.95177	0.765245	0.61904	0.0929441	3.92058	0.352168	0.45325	1.8731	0.848982	-0.167632	-2.46241	1.66729	0.447321	0.596976	0.661915	0.498382	0.302437	0.889652	0.269064
ACO2	R.LRPDRVAMQDAT[+568.21157]AQM[+15.99492]AM[+15.99492]LQFISSGLSK.V_3	TRUE	6.30274						#DIV/0!	#DIV/0!	#DIV/0!	#DIV/0!	-0.167632						#DIV/0!	#DIV/0!	#DIV/0!	#DIV/0!
ACO2	R.NAVTQEFGPVPDTAR.Y_2		0.754139	-0.489566	0.234634	0.268742	0.530779	1.00164	0.3594	0.444422	0.433986	0.192873	-0.167632	-2.46241	1.66729	0.447321	0.596976	0.661915	0.498382	0.302437	0.889652	0.269064
ACO2	R.NDANPETHAFVTSPEIVTALAIAGTLK.F_3		-0.0191425	0.716194	-0.196173	-0.469644	-0.461847	0.268565	0.355219	0.449504	-0.387935	-0.174378	-0.167632	-2.46241	1.66729	0.447321	0.596976	0.661915	0.498382	0.302437	0.889652	0.269064
ACO2	R.RAKDINQEVYNFLATAGAK.Y_2		-0.542702	3.80304		4.57642	4.92414	11.7103	0.208643	0.680595	5.44012	3.70252	-0.167632	-2.46241		0.447321	0.596976	0.661915	0.11597	0.935654	1.88376	1.76255
ACO2	R.WVVIGDENYGEGSSR.E_2		0.591253	-0.36256	0.365856	1.93847	1.40096	-0.034925	0.240299	0.619248	0.903318	0.559378	-0.167632	-2.46241	1.66729	0.447321	0.596976	0.661915	0.498382	0.302437	0.889652	0.269064
ACOT1	R.GLAPEQPVTLR.A_2		-1.48581	2.1379	-2.31274	4.01906	2.73315	1.33161	0.107635	0.968045	3.24816	3.14437	-1.2549	2.16918	-1.94603	2.59848	1.43132	0.112319	0.30322	0.518243	1.72462	0.893771
ACOT13	K.TLAFTSVDLTNK.A_2		0.615603	0.152632	-0.272579	0.627889	-0.348108	0.164561	0.96635	0.0148655	-0.0171052	-0.000254279	0.433968	-0.0138543	-0.36369	0.527531	-0.380552	0.0978251	0.866106	0.062429	0.0627936	0.00392014
ACOT7	K.ATLWYVPLSLK.N_2		0.233411	0.218673	0.178197	-0.256973	0.855831	0.452308	0.688823	0.161892	0.140295	0.0227127	0.757197	-0.323169	-0.779939	0.657414	1.55807	-1.2904	0.680619	0.167096	0.423667	0.070793
ACOT7	K.LM[+15.99492]DEVAGIVAAR.H_2		0.379933	0.788237	-0.89562	-1.52961	-1.79046	-1.8653	0.0245072	1.61071	-1.81931	-2.93037	0.757197	-0.323169	-0.779939	0.657414	1.55807	-1.2904	0.680619	0.167096	0.423667	0.070793
ACOT7	K.M[+15.99492]IEEAGAIISTR.H_2		0.271099	0.0798488	0.372094	4.36124	2.75558	2.77746	0.00475005	2.3233	3.05708	7.10252	0.757197	-0.323169	-0.779939	0.657414	1.55807	-1.2904	0.680619	0.167096	0.423667	0.070793
ACOT7	K.TN[+0.98402]IVTASVDAINFHDK.I_2		0.0405672	0.168202	0.506617	-0.309535	0.313097	-0.13856	0.288874	0.539292	-0.283462	-0.152869	0.757197	-0.323169	-0.779939	0.657414	1.55807	-1.2904	0.680619	0.167096	0.423667	0.070793
ACOT7	K.TNIVTASVDAINFHDK.I_2		-0.189905	0.379893	0.528405	0.214303	0.220766	0.75783	0.60664	0.217069	0.158169	0.0343335	0.757197	-0.323169	-0.779939	0.657414	1.55807	-1.2904	0.680619	0.167096	0.423667	0.070793
ACOT7	K.TNIVTASVDAINFHDK.I_3		0.426424	0.040769	0.155284	0.268939	0.576131	0.377514	0.241123	0.617762	0.200036	0.123575	0.757197	-0.323169	-0.779939	0.657414	1.55807	-1.2904	0.680619	0.167096	0.423667	0.070793
ACOT7	K.VLEVPPVVYSR.Q_2		-0.837013	1.50666	-0.698187	-1.44436	-0.443116	-1.10609	0.291514	0.535341	-0.988344	-0.529101	0.757197	-0.323169	-0.779939	0.657414	1.55807	-1.2904	0.680619	0.167096	0.423667	0.070793
ACOT7	R.AASAFFTYVSLSQEGR.S_2		0.793511	0.102735	-0.575256	-0.0599369	-0.0790852	-0.448056	0.506023	0.295829	-0.30269	-0.0895444	0.757197	-0.323169	-0.779939	0.657414	1.55807	-1.2904	0.680619	0.167096	0.423667	0.070793
ACOT7	R.IM[+15.99492]RPDDANVAGNVHGGTILK.M_2		0.961205	-0.812077	0.165587	-1.11203	-1.69591	-2.7169	0.0487574	1.31196	-1.94652	-2.55375	0.757197	-0.323169	-0.779939	0.657414	1.55807	-1.2904	0.680619	0.167096	0.423667	0.070793
ACOT7	R.IM[+15.99492]RPDDANVAGNVHGGTILK.M_3		0.629151	-0.652357	0.525124	1.66135	4.15215	-0.812954	0.371462	0.430086	1.49954	0.644932	0.757197	-0.323169	-0.779939	0.657414	1.55807	-1.2904	0.680619	0.167096	0.423667	0.070793
ACOT7	R.IM[+15.99492]RPDDANVAGNVHGGTILK.M_4		0.64059	-0.311012	0.228866	-1.69746	-1.50306	-0.693634	0.0228494	1.64113	-1.4842	-2.43576	0.757197	-0.323169	-0.779939	0.657414	1.55807	-1.2904	0.680619	0.167096	0.423667	0.070793
ACOT7	R.SLPVPQLVPETEDEK.K_2		-0.253844	0.507541	0.419118	-0.928823	-0.103048	-1.62293	0.0911241	1.04037	-1.1092	-1.15398	0.757197	-0.323169	-0.779939	0.657414	1.55807	-1.2904	0.680619	0.167096	0.423667	0.070793
ACOT7	R.SLPVPQLVPETEDEKK.R_2		2.07862	-2.49625	-4.47116	5.15387	5.66627	-1.39543	0.185603	0.731416	4.77117	3.48971	0.757197	-0.323169	-0.779939	0.657414	1.55807	-1.2904	0.680619	0.167096	0.423667	0.070793
ACOT9	K.DSYIEVLLPLGSEPELR.E_2		0.757471	0.309118	-1.44614	-0.868075	-0.614635	-0.190281	0.571717	0.242819	-0.431146	-0.10469	-0.0423645	0.46463	-0.246927	-0.0622557	-0.571159	0.272561	0.610434	0.214361	-0.178731	-0.038313
ACOT9	K.GPAFVN[+0.98402]PLIPESPEEEELFR.Q_2		-0.11891	0.789769	-0.1941	-0.871372	-2.83227	-1.27421	0.0547588	1.26155	-1.81821	-2.29375	-0.0423645	0.46463	-0.246927	-0.0622557	-0.571159	0.272561	0.610434	0.214361	-0.178731	-0.038313
ACOT9	K.GPAFVNPLIPESPEEEELFR.Q_2		0.958625	-0.314279	-0.35017	-1.00341	-3.01986	-2.07557	0.0422905	1.37376	-2.131	-2.92748	-0.0423645	0.46463	-0.246927	-0.0622557	-0.571159	0.272561	0.610434	0.214361	-0.178731	-0.038313
ACOT9	K.MSPLSIVTALVDK.I_2		-2.57429	1.65354	0.182846	-2.64023	-1.42819	-0.966244	0.344044	0.463386	-1.43225	-0.663685	-0.0423645	0.46463	-0.246927	-0.0622557	-0.571159	0.272561	0.610434	0.214361	-0.178731	-0.038313
ACOT9	R.DSENKGPAFVNPLIPESPEEEELFR.Q_3		0.551083	-0.109439	0.147103	0.387402	0.52596	-0.224529	0.916865	0.0376948	0.0333623	0.00125758	-0.0423645	0.46463	-0.246927	-0.0622557	-0.571159	0.272561	0.610434	0.214361	-0.178731	-0.038313
ACOT9	R.HFN[+0.98402]SMSGPATLR.K_2		1.46522	-1.43161	-0.402842	-0.119366	-0.632377	-0.525199	0.743328	0.128819	-0.302569	-0.0389768	-0.0423645	0.46463	-0.246927	-0.0622557	-0.571159	0.272561	0.610434	0.214361	-0.178731	-0.038313
ACOT9	R.HFNSM[+15.99492]SGPATLR.K_2		-0.206053	-0.698666	1.32161	-2.83023	-1.27462	0.188728	0.245741	0.609522	-1.44434	-0.880355	-0.0423645	0.46463	-0.246927	-0.0622557	-0.571159	0.272561	0.610434	0.214361	-0.178731	-0.038313
ACOT9	R.LC[+57.02146]ALGKGQLTPGRGLTQGPQNPK.K_2			4.06501	0.0626061	3.02036	4.46332	3.48616	0.390116	0.408806	1.59281	0.651148		0.46463	-0.246927	-0.0622557	-0.571159	0.272561	0.617732	0.2092	-0.229136	-0.0479353
ACOT9	R.TTIHEM[+15.99492]FLSTLDPK.T_2		-1.67997	0.998014	0.746356	3.30533	3.44743	3.34547	0.0173578	1.7605	3.34461	5.8882	-0.0423645	0.46463	-0.246927	-0.0622557	-0.571159	0.272561	0.610434	0.214361	-0.178731	-0.038313
ACOT9	R.TTIHEM[+15.99492]FLSTLDPK.T_3		0.542892	-0.35994	0.39638	0.750891	0.540126	0.614541	0.197655	0.704093	0.442076	0.311262	-0.0423645	0.46463	-0.246927	-0.0622557	-0.571159	0.272561	0.610434	0.214361	-0.178731	-0.038313
ACOT9	R.TTIHEMFLSTLDPK.T_3		0.744561	0.214307	-0.603224	-1.49029	-2.20692	-2.3616	0.010818	1.96585	-2.13815	-4.2033	-0.0423645	0.46463	-0.246927	-0.0622557	-0.571159	0.272561	0.610434	0.214361	-0.178731	-0.038313
ACOT9	R.VLPSNAVWM[+15.99492]ENSK.L_2		0.238833	0.027837	0.47906	1.11517	-0.702556	0.570888	0.893188	0.049057	0.0792584	0.00388818	-0.0423645	0.46463	-0.246927	-0.0622557	-0.571159	0.272561	0.610434	0.214361	-0.178731	-0.038313
ACOX1	K.EVAWNLTSVDLVR.A_2		-0.104097	0.0400654	0.788219	0.490566	2.44035	0.768726	0.212198	0.673259	0.991817	0.66775	0.305072	-0.42748	-0.659255	-0.734945	0.00183188	-1.65398	0.393559	0.40499	-0.535145	-0.216728
ACOX1	K.TSNHAIVLAQLITK.G_2		-2.61585	-1.30438	2.57562	7.00401	-1.83486	-0.237803	0.541037	0.266773	2.09199	0.558086	0.305072	-0.42748	-0.659255	-0.734945	0.00183188	-1.65398	0.393559	0.40499	-0.535145	-0.216728
ACOX1	K.TSNHAIVLAQLITK.G_3		1.02622	0.0939578	-1.40391	8.32376	5.27728	0.502162	0.114559	0.940969	4.79565	4.51256	0.305072	-0.42748	-0.659255	-0.734945	0.00183188	-1.65398	0.393559	0.40499	-0.535145	-0.216728
ACOX1	K.YAQVKPDGTYVKPLSNK.L_2		1.05292	0.304271	-3.11981	-7.95377	-2.55954		0.171096	0.766761	-4.66911	-3.58009	0.305072	-0.42748	-0.659255	-0.734945	0.00183188		0.834305	0.0786749	-0.106002	-0.00833973
ACOX1	K.YAQVKPDGTYVKPLSNK.L_3		2.14334	-2.68008	-2.54232	-2.54636	-4.36452	-9.45352	0.164364	0.784194	-4.42845	-3.47276	0.305072	-0.42748	-0.659255	-0.734945	0.00183188	-1.65398	0.393559	0.40499	-0.535145	-0.216728
ACOX1	R.EFGIADPDEIM[+15.99492]WFK.K_2		-0.563089	0.792371	0.335928	-0.47721	-1.07768	-1.00979	0.0772341	1.11219	-1.0433	-1.16035	0.305072	-0.42748	-0.659255	-0.734945	0.00183188	-1.65398	0.393559	0.40499	-0.535145	-0.216728
ACOX1	R.EIGTHKPLPGITVGDIGPK.F_2		0.105547	-1.09333	1.37282	-5.3971		-1.32893	0.143561	0.842962	-3.49136	-2.94309	0.305072	-0.42748	-0.659255	-0.734945		-1.65398	0.163304	0.787003	-0.93391	-0.73499
ACOX1	R.EIGTHKPLPGITVGDIGPK.F_3		0.0543517	0.851788	-0.470582	0.82667	0.689582	-1.73955	0.822659	0.0847801	-0.219617	-0.0186192	0.305072	-0.42748	-0.659255	-0.734945	0.00183188	-1.65398	0.393559	0.40499	-0.535145	-0.216728
ACOX1	R.GLETTATYDPETQEFILN[+0.98402]SPTVTSIK.W_3		-0.700757	1.14136	-0.128704	-0.241873	-0.513718	-1.57665	0.264551	0.577491	-0.881379	-0.508988	0.305072	-0.42748	-0.659255	-0.734945	0.00183188	-1.65398	0.393559	0.40499	-0.535145	-0.216728
ACOX1	R.GLETTATYDPETQEFILNSPTVTSIK.W_3		0.657351	0.264514	-0.550965	0.203681	-0.555528	-0.726222	0.349622	0.456401	-0.48299	-0.220437	0.305072	-0.42748	-0.659255	-0.734945	0.00183188	-1.65398	0.393559	0.40499	-0.535145	-0.216728
ACOX3	K.SVDFLDAYPGILDQK.F_2		0.41713	-0.52158	0.736497	-2.24209	-1.09524	-1.85849	0.0184874	1.73313	-1.94262	-3.3668	1.26898	-1.74413	0.261017	0.405535	-0.367404	-0.254455	0.999404	0.000258779	-0.000728928	-1.88631e-07
ACOX3	R.LLPYLAAVYALDHFSK.S_3		0.457503	-0.520362	0.734576	0.135324	0.979599	1.3227	0.320073	0.494751	0.588634	0.291228	1.26898	-1.74413	0.261017	0.405535	-0.367404	-0.254455	0.999404	0.000258779	-0.000728928	-1.88631e-07
ACOX3	R.PLALAFVELTVVQR.F_3		1.66025	-1.82533	-0.701697	2.64408	-0.805509	-0.154222	0.595075	0.225428	0.850373	0.191698	1.26898	-1.74413	0.261017	0.405535	-0.367404	-0.254455	0.999404	0.000258779	-0.000728928	-1.88631e-07
ACP1	K.IELLGSYDPQK.Q_2		0.535677	0.259603	-0.267787	2.8913	1.61397	1.43018	0.0251053	1.60023	1.80265	2.88467	1.06177	-0.690297	-0.380456	0.776538	0.191263	-0.129322	0.663051	0.178453	0.282488	0.0504109
ACP1	K.LVTDQNISENWR.V_2		0.856674	-0.521304	0.111341	-0.0513556	-0.0787418	-0.547591	0.432171	0.364344	-0.3748	-0.136556	1.06177	-0.690297	-0.380456	0.776538	0.191263	-0.129322	0.663051	0.178453	0.282488	0.0504109
ACP1	R.VDSAATSGYEIGNPPDYR.G_2		1.11948	-0.636924	-0.290503	-0.873703	-0.749074	-0.728869	0.190823	0.71937	-0.847899	-0.609953	1.06177	-0.690297	-0.380456	0.776538	0.191263	-0.129322	0.663051	0.178453	0.282488	0.0504109
ACSL1	K.VLQPTVFPVVPR.L_2		-1.63469	1.47153	0.0215486	-1.38225	-0.430603	-0.340304	0.522239	0.282131	-0.670516	-0.189173	-1.6158	1.32785	-0.00157101	-0.965869	-0.0865611	-0.00381131	0.791653	0.101465	-0.255576	-0.0259321
ACSL3	K.LKDIVSLVPR.L_2		0.27554	0.665461	-0.458044	-0.677732	-1.26165	-1.82559	0.0387521	1.41171	-1.41598	-1.99894	1.63962	-1.78174	-0.402317	-0.0835651	0.149542	-0.586437	0.994107	0.00256683	0.00799295	2.05165e-05
ACSL3	K.LQAGEYVSLGK.V_2		0.764472	0.434719	-1.04938	11.5712	11.4028	4.70738	0.0169351	1.77121	9.17717	16.2547	1.63962	-1.78174	-0.402317	-0.0835651	0.149542	-0.586437	0.994107	0.00256683	0.00799295	2.05165e-05
ACSL3	K.NWEEGGYFNTDKPHPR.G_3		2.08208	-2.47768	-2.39384	1.16557	2.51294	-2.69731	0.59341	0.226645	1.25688	0.284866	1.63962	-1.78174	-0.402317	-0.0835651	0.149542	-0.586437	0.994107	0.00256683	0.00799295	2.05165e-05
ACSL3	K.PSTM[+15.99492]K.L_1		-0.050239	0.678257	0.0401699	-1.12547	-1.33043	-1.71054	0.00489652	2.31011	-1.61154	-3.72285	1.63962	-1.78174	-0.402317	-0.0835651	0.149542	-0.586437	0.994107	0.00256683	0.00799295	2.05165e-05
ACSL3	R.EVLNEEDEVQPN[+0.98402]GK.I_2		1.3019	-3.66971	0.72963	-0.848597	-0.508214	-1.47741	0.815045	0.0888185	-0.398682	-0.0354103	1.63962	-1.78174	-0.402317	-0.0835651	0.149542	-0.586437	0.994107	0.00256683	0.00799295	2.05165e-05
ACSL3	R.IGYSSPQTLADQSSK.I_2		1.36884	-2.35914	0.260028	-1.62117	-2.6189	-0.307339	0.380511	0.419633	-1.27238	-0.53393	1.63962	-1.78174	-0.402317	-0.0835651	0.149542	-0.586437	0.994107	0.00256683	0.00799295	2.05165e-05
ACSL3	R.LLLC[+57.02146]GGAPLSATTQR.F_2		0.350808	-0.0873336	0.450687	1.5146	2.12257	1.52955	0.00462992	2.33443	1.48419	3.46472	1.63962	-1.78174	-0.402317	-0.0835651	0.149542	-0.586437	0.994107	0.00256683	0.00799295	2.05165e-05
ACSL3	R.LSPEPWTPETGLVTDAFK.L_2		0.778506	-0.485625	0.194559	-2.29463	-1.2852	-0.139386	0.124007	0.906555	-1.40222	-1.27119	1.63962	-1.78174	-0.402317	-0.0835651	0.149542	-0.586437	0.994107	0.00256683	0.00799295	2.05165e-05
ACSL3	R.NLFILAYNYK.M_2		0.767849	-0.170258	-0.111783	0.195428	-0.313436	-1.04652	0.307839	0.511676	-0.55011	-0.281478	1.63962	-1.78174	-0.402317	-0.0835651	0.149542	-0.586437	0.994107	0.00256683	0.00799295	2.05165e-05
ACSL3	R.NTPLC[+57.02146]DSFVFR.K_2		0.7227	-0.227859	0.00992315	2.15321	1.61462	1.15143	0.0223829	1.65008	1.4715	2.42809	1.63962	-1.78174	-0.402317	-0.0835651	0.149542	-0.586437	0.994107	0.00256683	0.00799295	2.05165e-05
ACSL3	R.SVNSLDGLASVLYPGC[+57.02146]DTLDK.V_2		-0.177801	0.150095	0.793881	-0.118234	0.416201	1.8138	0.523759	0.280869	0.448533	0.125979	1.63962	-1.78174	-0.402317	-0.0835651	0.149542	-0.586437	0.994107	0.00256683	0.00799295	2.05165e-05
ACSL4	K.EAVVHGLNESEASYLITSVELLESK.L_3		0.713712	-0.759306	0.568423	-1.587	-0.766451	-0.965219	0.0730185	1.13657	-1.2805	-1.45537	1.80449	-1.11935	-1.58315	-0.440288	-0.186735	-0.824986	0.872126	0.0594208	-0.184667	-0.0109731
ACSL4	K.GYDAPLC[+57.02146]NLLLFK.K_2		0.964138	0.112913	-1.11936	0.0608063	-0.498661	-1.65456	0.434724	0.361787	-0.683368	-0.247233	1.80449	-1.11935	-1.58315	-0.440288	-0.186735	-0.824986	0.872126	0.0594208	-0.184667	-0.0109731
ACSL4	K.LKDWQEGGYTINDKPNPR.G_3		0.843224	-1.28442	0.812095	5.95268	4.39865	1.56301	0.0584341	1.23333	3.84781	4.74564	1.80449	-1.11935	-1.58315	-0.440288	-0.186735	-0.824986	0.872126	0.0594208	-0.184667	-0.0109731
ACSL4	K.SDQSYVISFVVPNQK.R_2		0.851684	0.140953	-0.751173	-0.45758	-0.154957	-0.298394	0.461281	0.336034	-0.384132	-0.129081	1.80449	-1.11935	-1.58315	-0.440288	-0.186735	-0.824986	0.872126	0.0594208	-0.184667	-0.0109731
ACSL4	K.WM[+15.99492]NYLEVNR.R_2		2.0032	-2.20299	-2.23267	0.475081	-0.500882	-0.939624	0.755752	0.121621	0.489011	0.0594739	1.80449	-1.11935	-1.58315	-0.440288	-0.186735	-0.824986	0.872126	0.0594208	-0.184667	-0.0109731
ACSL4	R.GEIVIGGQNISM[+15.99492]GYFK.N_2		0.572301	-0.163453	0.228032	0.336272	1.12187	-0.794465	0.988751	0.00491298	0.00893058	4.38758e-05	1.80449	-1.11935	-1.58315	-0.440288	-0.186735	-0.824986	0.872126	0.0594208	-0.184667	-0.0109731
ACSL4	R.IGYSSPLTLSDQSSK.I_2		2.0271	-1.86977	-3.72962	1.14648	-0.093171	-0.324135	0.460162	0.337089	1.43382	0.483325	1.80449	-1.11935	-1.58315	-0.440288	-0.186735	-0.824986	0.872126	0.0594208	-0.184667	-0.0109731
ACSL4	R.LSPEPWTPETGLVTDAFK.L_2		0.774137	-0.489995	0.19019	-2.29655	-1.28712	-0.141301	0.124492	0.904859	-1.39977	-1.26659	1.80449	-1.11935	-1.58315	-0.440288	-0.186735	-0.824986	0.872126	0.0594208	-0.184667	-0.0109731
ACSL4	R.M[+15.99492]M[+15.99492]LSGGAPLSPQTHR.F_2		-1.92555	1.6107	-0.128478	-1.04472	-4.42998	-0.631335	0.297675	0.526258	-1.88757	-0.993348	1.80449	-1.11935	-1.58315	-0.440288	-0.186735	-0.824986	0.872126	0.0594208	-0.184667	-0.0109731
ACSL4	R.M[+15.99492]M[+15.99492]LSGGAPLSPQTHR.F_3		1.65683	-0.903731	-2.00424	0.339792	0.168246	-0.318624	0.685588	0.163937	0.480184	0.0787197	1.80449	-1.11935	-1.58315	-0.440288	-0.186735	-0.824986	0.872126	0.0594208	-0.184667	-0.0109731
ACSL4	R.PTPSDMAIVM[+15.99492]YTSGSTGRPK.G_3		-0.886996	0.813853	0.575374	-2.03406	-0.132855	-0.802534	0.207218	0.683573	-1.15723	-0.791048	1.80449	-1.11935	-1.58315	-0.440288	-0.186735	-0.824986	0.872126	0.0594208	-0.184667	-0.0109731
ACSS2	K.GATTN[+0.98402]IC[+57.02146]YNVLDRNVHEK.K_3		-1.5333	-5.0073	2.49736	-0.410911	-0.243141	1.49816	0.509584	0.292784	1.62912	0.476979	-4.44437	1.96397	2.51786	-1.75725	0.414948	2.08	0.929966	0.0315328	0.233415	0.00736023
ACSS2	K.IGPIATPDYIQNAPGLPK.T_2		-6.68273	1.28762	0.0819804	-2.06219	1.19765	2.1267	0.475542	0.322811	2.19177	0.707527	-4.44437	1.96397	2.51786	-1.75725	0.414948	2.08	0.929966	0.0315328	0.233415	0.00736023
ACTA2	K.IWHHSFYNELR.V_2		-0.0122095	-0.946363	1.30851	0.410851	0.574879	0.808844	0.508607	0.293618	0.481544	0.14139	-0.197945	-2.49762	2.08448	0.13221	0.187869	1.24266	0.625144	0.20402	0.72461	0.147835
ACTA2	K.IWHHSFYNELR.V_3		-0.243679	-2.86984	1.97872	0.503539	0.421987	1.87806	0.42482	0.371795	1.3128	0.488091	-0.197945	-2.49762	2.08448	0.13221	0.187869	1.24266	0.625144	0.20402	0.72461	0.147835
ACTB	M.[+42.01056]DDDIAALVVDNGSGM[+15.99492]C[+57.02146]K.A_2		0.83851	-1.15448	0.571375	-1.42406	-1.62024	-0.543386	0.144197	0.841043	-1.28103	-1.0774	-0.108694	-0.0487718	-0.00752077	-0.660472	-1.03558	1.03366	0.807549	0.0928312	-0.1658	-0.0153915
ACTB	M.[+42.01056]DDDIAALVVDNGSGMC[+57.02146]K.A_2		-0.89129	1.3819	-0.466803	-0.0182176	-0.384858	1.80311	0.661534	0.179448	0.458741	0.08232	-0.108694	-0.0487718	-0.00752077	-0.660472	-1.03558	1.03366	0.807549	0.0928312	-0.1658	-0.0153915
ACTBL2	K.DLYANTVLSGGST[+656.22761]M[+15.99492]YPGIADRM[+15.99492]QKEIITLAPSTMK.I_3	TRUE	-6.00176	2.30197	-2.28528	-4.09327	-1.09106	-1.36288	0.945708	0.0242428	-0.187384	-0.00454272	-2.2539	1.78661	0.187379	-2.11016	-1.18376	-1.60537	0.270407	0.567981	-1.53979	-0.874574
ACTBL2	K.DLYANTVLSGGST[+656.22761]MYPGIADRM[+15.99492]QKEIITLAPSTM[+15.99492]K.I_3	TRUE	-5.28845	2.27034	-1.36885	-3.47024	-0.442474	-0.505333	0.996762	0.00140846	-0.0103624	-1.45949e-05	-2.2539	1.78661	0.187379	-2.11016	-1.18376	-1.60537	0.270407	0.567981	-1.53979	-0.874574
ACTBL2	K.DLYANTVLSGGSTM[+15.99492]YPGIADR.M_2		-2.22665	-0.125777	1.90273	-4.19916	-4.65464	-2.28537	0.063108	1.19992	-3.56316	-4.27549	-2.2539	1.78661	0.187379	-2.11016	-1.18376	-1.60537	0.270407	0.567981	-1.53979	-0.874574
ACTBL2	K.DLYANTVLSGGSTM[+15.99492]YPGIADR.M_3		-2.05491	1.20775	0.614244	-0.694394	-0.750903	-0.386536	0.625539	0.203745	-0.532973	-0.108591	-2.2539	1.78661	0.187379	-2.11016	-1.18376	-1.60537	0.270407	0.567981	-1.53979	-0.874574
ACTBL2	K.IWYHTFYNELR.V_3		-4.49955	2.48616	-5.47276	-0.381038	0.43859	-3.97102	0.697403	0.156516	1.19089	0.186394	-2.2539	1.78661	0.187379	-2.11016	-1.18376	-1.60537	0.270407	0.567981	-1.53979	-0.874574
ACTBL2	K.MTQIMFEAFNTPAM[+15.99492]YVAIQAVLSLYASGR.T_3		0.421428	0.824786	-1.33776	-1.3255	-1.18949	-0.275091	0.291731	0.535017	-0.89951	-0.481253	-2.2539	1.78661	0.187379	-2.11016	-1.18376	-1.60537	0.270407	0.567981	-1.53979	-0.874574
ACTBL2	R.AVFPS[+947.32303]MIGRPR.H_3	TRUE	-0.155976	1.22309	-0.998524	-1.67931	-1.08028	-2.56949	0.0819979	1.0862	-1.79922	-1.95431	-2.2539	1.78661	0.187379	-2.11016	-1.18376	-1.60537	0.270407	0.567981	-1.53979	-0.874574
ACTBL2	R.KDLYANT[+203.07937]VLS[+406.15875]GGS[+406.15875]TMYPGIADR.M_3	TRUE	-0.237175	0.317478	0.646459	1.13063	1.05876	1.46899	0.0272113	1.56525	0.977207	1.52957	-2.2539	1.78661	0.187379	-2.11016	-1.18376	-1.60537	0.270407	0.567981	-1.53979	-0.874574
ACTBL2	R.TT[+1312.45523]GIVMDS[+406.15875]GDGVT[+203.07937]HIVPIYEGYALPHAILR.L_8	TRUE		7.2804		9.3102	9.69558	9.47002	#DIV/0!	#DIV/0!	2.21153	#DIV/0!		1.78661		-2.11016	-1.18376	-1.60537	#DIV/0!	#DIV/0!	-3.41971	#DIV/0!
ACTBL2	R.TTGIVMDSGDGVTHIVPIYEGYALPHAILR.L_4		1.19904	-0.811371	-0.436264	-4.79264			#DIV/0!	#DIV/0!	-4.77645	#DIV/0!	-2.2539	1.78661	0.187379	-2.11016			#DIV/0!	#DIV/0!	-2.01686	#DIV/0!
ACTBL2	R.VAPDEHPILLTEAPLNPK.I_3		0.524974	-0.103405	-0.312179	-0.835457	-0.392297	-0.815098	0.0687256	1.16288	-0.717414	-0.834267	-2.2539	1.78661	0.187379	-2.11016	-1.18376	-1.60537	0.270407	0.567981	-1.53979	-0.874574
ACTC1	K.DLYAN[+0.98402]NVLSGGTTM[+15.99492]YPGIADR.M_2		-0.125252	0.959005	-0.399526	-0.832828	0.175666	-1.14253	0.26486	0.576984	-0.744639	-0.429645	-0.528204	0.516836	-0.473946	-1.58661	-0.333368	-0.730578	0.22396	0.64983	-0.721747	-0.469012
ACTC1	K.DLYAN[+0.98402]NVLSGGTTMYPGIADR.M_2		-0.387946	0.791487	0.212159	-0.274365	0.0944184	-0.365831	0.352598	0.45272	-0.38716	-0.175275	-0.528204	0.516836	-0.473946	-1.58661	-0.333368	-0.730578	0.22396	0.64983	-0.721747	-0.469012
ACTC1	K.DLYAN[+0.98402]NVLSGGTTMYPGIADR.M_3		-0.35518	0.396801	0.585878	-0.576199	0.0746989	-0.310482	0.235477	0.628051	-0.479827	-0.301356	-0.528204	0.516836	-0.473946	-1.58661	-0.333368	-0.730578	0.22396	0.64983	-0.721747	-0.469012
ACTC1	K.DLYANN[+0.98402]VLSGGTTM[+15.99492]YPGIADR.M_2		-0.697135	0.356798	0.930177	-1.45344	-0.589755	-1.78368	0.0685642	1.1639	-1.47224	-1.71354	-0.528204	0.516836	-0.473946	-1.58661	-0.333368	-0.730578	0.22396	0.64983	-0.721747	-0.469012
ACTC1	K.DLYANN[+0.98402]VLSGGTTMYPGIADR.M_2		-0.467041	0.861554	0.186848	-0.285444	0.0388482	-0.387509	0.373218	0.428038	-0.405155	-0.173422	-0.528204	0.516836	-0.473946	-1.58661	-0.333368	-0.730578	0.22396	0.64983	-0.721747	-0.469012
ACTC1	K.DLYANNVLSGGTTM[+15.99492]YPGIADR.M_2		-2.68815	2.36511	-2.7505	-0.812831	-1.56136	-3.48883	0.645627	0.190018	-0.929823	-0.176683	-0.528204	0.516836	-0.473946	-1.58661	-0.333368	-0.730578	0.22396	0.64983	-0.721747	-0.469012
ACTC1	K.DLYANNVLSGGTTM[+15.99492]YPGIADR.M_3		1.41235	-0.35196	-1.81672	-0.95327	-0.811263	-1.06912	0.500692	0.300429	-0.692444	-0.20803	-0.528204	0.516836	-0.473946	-1.58661	-0.333368	-0.730578	0.22396	0.64983	-0.721747	-0.469012
ACTC1	K.LC[+57.02146]YVALDFEN[+0.98402]EM[+15.99492]AT[+406.15875]AAS[+1312.45523]SSSLEK.S_5	TRUE	0.817825	-0.105587	-0.698424	-1.50359	0.165449	0.496581	0.726613	0.138697	-0.285125	-0.0395459	-0.528204	0.516836	-0.473946	-1.58661	-0.333368	-0.730578	0.22396	0.64983	-0.721747	-0.469012
ACTC1	K.LC[+57.02146]YVALDFEN[+0.98402]EM[+15.99492]ATAASSSSLEK.S_2		-2.64439	2.42116	-4.07568			-0.994448	#DIV/0!	#DIV/0!	0.438519	#DIV/0!	-0.528204	0.516836	-0.473946			-0.730578	#DIV/0!	#DIV/0!	-0.568806	#DIV/0!
ACTC1	K.LC[+57.02146]YVALDFENEM[+15.99492]ATAASSSSLEK.S_2		2.01259	-2.11411	-2.01697	0.811698		-2.20411	0.996487	0.00152822	0.00995983	1.52208e-05	-0.528204	0.516836	-0.473946	-1.58661		-0.730578	0.163327	0.786941	-0.996821	-0.784439
ACTC1	K.LC[+57.02146]YVALDFENEMATAASSSSLEK.S_2			1.26117	4.80102	2.944	4.87578	6.04217	0.433214	0.363298	1.58956	0.577483		0.516836	-0.473946	-1.58661	-0.333368	-0.730578	0.230705	0.636943	-0.904963	-0.57641
ACTC1	K.LC[+57.02146]YVALDFENEMATAASSSSLEK.S_3		-0.027077	0.201722	0.546336	1.03969	1.88019	1.49661	0.0139037	1.85687	1.23184	2.28736	-0.528204	0.516836	-0.473946	-1.58661	-0.333368	-0.730578	0.22396	0.64983	-0.721747	-0.469012
ACTC1	K.MTQIMFETFN[+0.98402]VPAMYVAIQAVLSLYASGR.T_3		-0.600335	-0.352535	1.90907		0.088007	-0.15489	0.756016	0.121469	-0.352174	-0.0427783	-0.528204	0.516836	-0.473946		-0.333368	-0.730578	0.482256	0.316722	-0.370201	-0.117251
ACTC1	K.QEYDEAGPSIVHR.K_2		1.02351	-0.184325	-0.616998	-0.165838	0.198054	-0.116045	0.849465	0.0708544	-0.102006	-0.00722754	-0.528204	0.516836	-0.473946	-1.58661	-0.333368	-0.730578	0.22396	0.64983	-0.721747	-0.469012
ACTC1	K.QEYDEAGPSIVHR.K_3		1.16553	-0.115252	-1.16309	-1.15811	-0.462539	-0.130661	0.500487	0.300608	-0.546165	-0.164181	-0.528204	0.516836	-0.473946	-1.58661	-0.333368	-0.730578	0.22396	0.64983	-0.721747	-0.469012
ACTC1	K.YPIEHGIITN[+0.98402]WDDM[+15.99492]EK.I_2		0.396309	-1.14883	1.08097	-2.82764	-2.90716	-1.1675	0.0502729	1.29867	-2.41025	-3.1301	-0.528204	0.516836	-0.473946	-1.58661	-0.333368	-0.730578	0.22396	0.64983	-0.721747	-0.469012
ACTC1	K.YPIEHGIITN[+0.98402]WDDM[+15.99492]EK.I_3		1.36698	-3.10371	0.466393	-2.16395	-3.7116	-1.40943	0.258675	0.587246	-2.00488	-1.17736	-0.528204	0.516836	-0.473946	-1.58661	-0.333368	-0.730578	0.22396	0.64983	-0.721747	-0.469012
ACTC1	K.YPIEHGIITNWDDM[+15.99492]EK.I_2		0.0352746	-1.88739	1.59343	-1.34121	-1.74046	0.488889	0.557822	0.253504	-0.778029	-0.197234	-0.528204	0.516836	-0.473946	-1.58661	-0.333368	-0.730578	0.22396	0.64983	-0.721747	-0.469012
ACTC1	K.YPIEHGIITNWDDM[+15.99492]EK.I_3		0.0439389	-2.20527	1.66583	-2.24081	-2.87261	-0.0511681	0.331871	0.47903	-1.55636	-0.745545	-0.528204	0.516836	-0.473946	-1.58661	-0.333368	-0.730578	0.22396	0.64983	-0.721747	-0.469012
ACTC1	K.YPIEHGIITNWDDMEK.I_2		-1.84627	1.25745	0.466068	-1.59753	-1.08284	0.168068	0.497444	0.303256	-0.79652	-0.241549	-0.528204	0.516836	-0.473946	-1.58661	-0.333368	-0.730578	0.22396	0.64983	-0.721747	-0.469012
ACTC1	K.YPIEHGIITNWDDMEK.I_3		-2.72034	1.04411	0.957688	-1.50411	-1.33345	0.63434	0.744638	0.128055	-0.494897	-0.0633739	-0.528204	0.516836	-0.473946	-1.58661	-0.333368	-0.730578	0.22396	0.64983	-0.721747	-0.469012
ACTC1	K.YPIEHGIITNWDDMEKIWHHTFYNELR.V_5		0.347812	-0.0139389	0.319013	-0.806159	-0.209186	-0.817378	0.0233536	1.63165	-0.828537	-1.35188	-0.528204	0.516836	-0.473946	-1.58661	-0.333368	-0.730578	0.22396	0.64983	-0.721747	-0.469012
ACTC1	R.C[+57.02146]PETLFQPSFIGM[+15.99492]ESAGIHETTYNSIM[+15.99492]K.C_3		4.28292	-1.63582					#DIV/0!	#DIV/0!	#DIV/0!	#DIV/0!	-0.528204	0.516836					#DIV/0!	#DIV/0!	#DIV/0!	#DIV/0!
ACTC1	R.C[+57.02146]PETLFQPSFIGMESAGIHETTYN[+0.98402]SIMK.C_3			3.73047	2.30649	-5.85704	-1.78345	-4.33473	0.0228804	1.64054	-7.01022	-11.5005		0.516836	-0.473946	-1.58661	-0.333368	-0.730578	0.230705	0.636943	-0.904963	-0.57641
ACTC1	R.GYSFVTTAER.E_2		-0.111108	0.980736	-0.430501	-1.26684	-0.134683	-1.73172	0.135534	0.867952	-1.19079	-1.03355	-0.528204	0.516836	-0.473946	-1.58661	-0.333368	-0.730578	0.22396	0.64983	-0.721747	-0.469012
ACTC1	R.KDLYAN[+0.98402]NVLS[+406.15875]GGT[+568.21157]TM[+15.99492]YPGIADR.M_3	TRUE	-1.35817	0.344542	1.35912	-0.156889	1.26705	0.944322	0.562121	0.25017	0.569663	0.142513	-0.528204	0.516836	-0.473946	-1.58661	-0.333368	-0.730578	0.22396	0.64983	-0.721747	-0.469012
ACTC1	R.KDLYAN[+0.98402]NVLSGGTTM[+15.99492]YPGIADR.M_2		2.01926	-1.91316	-2.96542	-2.17674	0.765761	2.43806	0.558055	0.253323	1.29547	0.328172	-0.528204	0.516836	-0.473946	-1.58661	-0.333368	-0.730578	0.22396	0.64983	-0.721747	-0.469012
ACTC1	R.KDLYAN[+0.98402]NVLSGGTTM[+15.99492]YPGIADR.M_3		-2.42197	2.11821	-1.42644	0.325891	-0.103136	-0.19351	0.694165	0.158538	0.586483	0.0929795	-0.528204	0.516836	-0.473946	-1.58661	-0.333368	-0.730578	0.22396	0.64983	-0.721747	-0.469012
ACTC1	R.KDLYANN[+0.98402]VLS[+406.15875]GGT[+568.21157]TM[+15.99492]YPGIADR.M_3	TRUE	-1.36153	0.341181	1.35576	-0.143404	1.28053	0.957806	0.551153	0.258728	0.586508	0.151746	-0.528204	0.516836	-0.473946	-1.58661	-0.333368	-0.730578	0.22396	0.64983	-0.721747	-0.469012
ACTC1	R.KDLYANNVLSGGTTM[+15.99492]YPGIADR.M_2		0.111993	-0.0823584	0.694002	0.784889	-2.81954	0.117065	0.479933	0.318819	-0.880408	-0.280691	-0.528204	0.516836	-0.473946	-1.58661	-0.333368	-0.730578	0.22396	0.64983	-0.721747	-0.469012
ACTC1	R.KDLYANNVLSGGTTM[+15.99492]YPGIADR.M_3		0.424871	0.53673	-0.520447	1.02656	1.36025	-0.484583	0.501034	0.300132	0.487023	0.146171	-0.528204	0.516836	-0.473946	-1.58661	-0.333368	-0.730578	0.22396	0.64983	-0.721747	-0.469012
ACTC1	R.TTGIVLDSGDGVTHN[+0.98402]VPIYEGYALPHAIM[+15.99492]R.L_3		0.864871	0.41626	-1.44737	-3.07079	0.0716757	-5.04614	0.186608	0.72907	-2.62634	-1.91478	-0.528204	0.516836	-0.473946	-1.58661	-0.333368	-0.730578	0.22396	0.64983	-0.721747	-0.469012
ACTC1	R.TTGIVLDSGDGVTHN[+0.98402]VPIYEGYALPHAIM[+15.99492]R.L_4		0.512993	0.864769	-1.5303	-0.881313	0.427541	2.8168	0.558409	0.253048	0.838523	0.212186	-0.528204	0.516836	-0.473946	-1.58661	-0.333368	-0.730578	0.22396	0.64983	-0.721747	-0.469012
ACTC1	R.TTGIVLDSGDGVTHNVPIYEGYALPHAIM[+15.99492]R.L_3		-1.133	0.85228	0.677965	0.643969	-0.364363	1.21462	0.665514	0.176843	0.365661	0.0646645	-0.528204	0.516836	-0.473946	-1.58661	-0.333368	-0.730578	0.22396	0.64983	-0.721747	-0.469012
ACTC1	R.TTGIVLDSGDGVTHNVPIYEGYALPHAIM[+15.99492]R.L_4		0.235091	0.918578	-0.93539	0.141678	1.61439	-0.837397	0.807049	0.0930999	0.233465	0.0217355	-0.528204	0.516836	-0.473946	-1.58661	-0.333368	-0.730578	0.22396	0.64983	-0.721747	-0.469012
ACTC1	R.VAPEEHPTLLTEAPLN[+0.98402]PK.A_3		-0.453596	0.666872	0.391735	0.329078	0.621648	0.614181	0.413081	0.383965	0.319965	0.122856	-0.528204	0.516836	-0.473946	-1.58661	-0.333368	-0.730578	0.22396	0.64983	-0.721747	-0.469012
ACTC1	R.VAPEEHPTLLTEAPLNPK.A_2		-0.176351	0.0140314	0.83785	-1.39896	-1.25399	-0.28248	0.0621198	1.20677	-1.20365	-1.45253	-0.528204	0.516836	-0.473946	-1.58661	-0.333368	-0.730578	0.22396	0.64983	-0.721747	-0.469012
ACTC1	R.VAPEEHPTLLTEAPLNPK.A_3		-0.396629	1.48821	-1.27582	5.01674	5.78858	-0.276203	0.16006	0.795718	3.57112	2.8416	-0.528204	0.516836	-0.473946	-1.58661	-0.333368	-0.730578	0.22396	0.64983	-0.721747	-0.469012
ACTG1	K.AGFAGDDAPR.A_1		-4.43406	-6.65989	2.76496	-3.08801	-2.726	-1.06186	0.875953	0.057519	0.48437	0.0278605	-0.133005	-1.11614	1.35437	-1.26748	-1.07694	0.46128	0.503604	0.297911	-0.662789	-0.197452
ACTG1	K.DLYAN[+0.98402]TVLSGGTTM[+15.99492]YPGIADR.M_2		-0.179758	0.462823	0.420075	-2.22303	-2.53345	-2.07685	0.000528739	3.27676	-2.51216	-8.23173	-0.133005	-1.11614	1.35437	-1.26748	-1.07694	0.46128	0.503604	0.297911	-0.662789	-0.197452
ACTG1	K.DLYAN[+0.98402]TVLSGGTTM[+15.99492]YPGIADR.M_3		-0.484408	0.845815	0.251807	-1.65223	-1.82554	-1.1907	0.0147886	1.83007	-1.76056	-3.22196	-0.133005	-1.11614	1.35437	-1.26748	-1.07694	0.46128	0.503604	0.297911	-0.662789	-0.197452
ACTG1	K.DLYAN[+0.98402]TVLSGGTTMYPGIADR.M_2		-2.00092	0.976843	0.86134	-0.841045	-0.606316	0.298662	0.76651	0.115482	-0.328654	-0.0379537	-0.133005	-1.11614	1.35437	-1.26748	-1.07694	0.46128	0.503604	0.297911	-0.662789	-0.197452
ACTG1	K.DLYAN[+0.98402]TVLSGGTTMYPGIADR.M_3		-0.311218	0.414036	0.513698	0.168159	0.309746	-0.664575	0.539888	0.267696	-0.267729	-0.07167	-0.133005	-1.11614	1.35437	-1.26748	-1.07694	0.46128	0.503604	0.297911	-0.662789	-0.197452
ACTG1	K.DLYANTVLSGGTTM[+15.99492]YPGIADR.M_2		0.101578	0.218566	0.431313	-1.80438	-2.03025	-1.75009	8.17808e-05	4.08735	-2.11206	-8.63272	-0.133005	-1.11614	1.35437	-1.26748	-1.07694	0.46128	0.503604	0.297911	-0.662789	-0.197452
ACTG1	K.DLYANTVLSGGTTM[+15.99492]YPGIADR.M_3		0.109682	0.142048	0.47743	-0.953111	-1.14043	-0.82712	0.00121474	2.91552	-1.21661	-3.54703	-0.133005	-1.11614	1.35437	-1.26748	-1.07694	0.46128	0.503604	0.297911	-0.662789	-0.197452
ACTG1	K.DLYANTVLSGGTTMYPGIADR.M_2		-2.69237	1.4239	0.429208	-0.922739	-0.773828	-0.0728814	0.818767	0.0868394	-0.310064	-0.0269257	-0.133005	-1.11614	1.35437	-1.26748	-1.07694	0.46128	0.503604	0.297911	-0.662789	-0.197452
ACTG1	K.DLYANTVLSGGTTMYPGIADR.M_3		-0.928071	0.957701	0.404183	-0.479912	0.0978256	0.296725	0.789439	0.102682	-0.173058	-0.0177699	-0.133005	-1.11614	1.35437	-1.26748	-1.07694	0.46128	0.503604	0.297911	-0.662789	-0.197452
ACTG1	K.DSYVGDEAQSK.R_2		-2.64101	-2.91056	2.63759	-4.02697	-2.91793	-0.691989	0.486364	0.313038	-1.5743	-0.492816	-0.133005	-1.11614	1.35437	-1.26748	-1.07694	0.46128	0.503604	0.297911	-0.662789	-0.197452
ACTG1	K.EITALAPSTM[+15.99492]K.I_1		-0.142292	0.690943	0.0610114	-0.842654	-0.837454	-0.591808	0.0220302	1.65698	-0.960526	-1.59157	-0.133005	-1.11614	1.35437	-1.26748	-1.07694	0.46128	0.503604	0.297911	-0.662789	-0.197452
ACTG1	K.EITALAPSTM[+15.99492]K.I_2		0.168377	0.386104	0.0988626	-0.161856	-0.24835	-0.45495	0.0145339	1.83762	-0.506166	-0.930141	-0.133005	-1.11614	1.35437	-1.26748	-1.07694	0.46128	0.503604	0.297911	-0.662789	-0.197452
ACTG1	K.EITALAPSTM[+15.99492]KIK.I_2		-0.541581	0.00362169	1.11021	-0.999564	-0.526344	-1.24784	0.103143	0.986561	-1.11533	-1.10034	-0.133005	-1.11614	1.35437	-1.26748	-1.07694	0.46128	0.503604	0.297911	-0.662789	-0.197452
ACTG1	K.EITALAPSTMK.I_2		-0.920789	1.04061	0.285451	-1.1649	-0.968852	0.371893	0.388841	0.410228	-0.722377	-0.296339	-0.133005	-1.11614	1.35437	-1.26748	-1.07694	0.46128	0.503604	0.297911	-0.662789	-0.197452
ACTG1	K.EKLC[+57.02146]YVALDFEQEMATAASSSSLEK.S_3		-1.02583	0.435894	1.07189	0.959504	1.21227	2.10591	0.150089	0.823652	1.26524	1.04212	-0.133005	-1.11614	1.35437	-1.26748	-1.07694	0.46128	0.503604	0.297911	-0.662789	-0.197452
ACTG1	K.EKLC[+57.02146]YVALDFEQEMATAASSSSLEK.S_4		1.7453	-11.1455	-3.63092	2.73011	4.14065	4.26712	0.0994652	1.00233	8.05634	8.0751	-0.133005	-1.11614	1.35437	-1.26748	-1.07694	0.46128	0.503604	0.297911	-0.662789	-0.197452
ACTG1	K.IIAPPER.K_1		-3.21861	-5.58754	2.75724	-12.444	-10.1581	-2.49937	0.178738	0.747783	-6.35086	-4.74906	-0.133005	-1.11614	1.35437	-1.26748	-1.07694	0.46128	0.503604	0.297911	-0.662789	-0.197452
ACTG1	K.IKIIAPPER.K_2		1.94956	-1.93484	-1.61526	0.840975	-3.31271	3.25335	0.745858	0.127344	0.794053	0.101118	-0.133005	-1.11614	1.35437	-1.26748	-1.07694	0.46128	0.503604	0.297911	-0.662789	-0.197452
ACTG1	K.IWHHTFYN[+0.98402]ELR.V_2		-1.22508	-6.70867	2.17973	-1.28749	-2.03454	1.36844	0.673062	0.171945	1.26681	0.217822	-0.133005	-1.11614	1.35437	-1.26748	-1.07694	0.46128	0.503604	0.297911	-0.662789	-0.197452
ACTG1	K.IWHHTFYN[+0.98402]ELR.V_3		-1.23257	-8.69629	1.79614	-1.70063	-2.2172	1.15983	0.61499	0.211132	1.79158	0.378259	-0.133005	-1.11614	1.35437	-1.26748	-1.07694	0.46128	0.503604	0.297911	-0.662789	-0.197452
ACTG1	K.IWHHTFYNELR.V_2		-1.30074	-3.89064	2.37325	1.07965	0.521434	2.16657	0.307861	0.511646	2.19526	1.1232	-0.133005	-1.11614	1.35437	-1.26748	-1.07694	0.46128	0.503604	0.297911	-0.662789	-0.197452
ACTG1	K.IWHHTFYNELR.V_3		-1.67942	-5.72295	2.51569	0.553252	-0.473938	2.11412	0.397687	0.400459	2.36004	0.945097	-0.133005	-1.11614	1.35437	-1.26748	-1.07694	0.46128	0.503604	0.297911	-0.662789	-0.197452
ACTG1	K.LC[+57.02146]YVALDFEQEM[+15.99492]ATAASSSSLEK.S_2		0.719121	-0.093461	-0.105464	0.376971	-0.830795	-0.351553	0.376645	0.424068	-0.441857	-0.187378	-0.133005	-1.11614	1.35437	-1.26748	-1.07694	0.46128	0.503604	0.297911	-0.662789	-0.197452
ACTG1	K.LC[+57.02146]YVALDFEQEM[+15.99492]ATAASSSSLEK.S_3		1.21628	-0.312834	-0.967485	-1.42607	-1.79097	-1.76409	0.0673063	1.17194	-1.63903	-1.92086	-0.133005	-1.11614	1.35437	-1.26748	-1.07694	0.46128	0.503604	0.297911	-0.662789	-0.197452
ACTG1	K.LC[+57.02146]YVALDFEQEMATAASSSSLEK.S_2		-6.56043	0.0479779	1.55373	2.41193	3.28745	4.61554	0.118976	0.924541	5.09121	4.70704	-0.133005	-1.11614	1.35437	-1.26748	-1.07694	0.46128	0.503604	0.297911	-0.662789	-0.197452
ACTG1	K.LC[+57.02146]YVALDFEQEMATAASSSSLEK.S_3		-7.85491	-0.0062643	1.30163	1.63451	2.53213	3.58294	0.177025	0.751964	4.76971	3.58665	-0.133005	-1.11614	1.35437	-1.26748	-1.07694	0.46128	0.503604	0.297911	-0.662789	-0.197452
ACTG1	K.M[+15.99492]TQIM[+15.99492]FETFNTPAMYVAIQAVLSLYASGR.T_3		0.128087	0.0250918	0.478845	-0.0134349	-0.28916	0.0228447	0.146552	0.834009	-0.303925	-0.253476	-0.133005	-1.11614	1.35437	-1.26748	-1.07694	0.46128	0.503604	0.297911	-0.662789	-0.197452
ACTG1	K.M[+15.99492]TQIMFETFNTPAMYVAIQAVLSLYASGR.T_3		-1.00238	0.958042	0.448164	-0.482241	-0.159792	-0.74595	0.383807	0.415887	-0.597268	-0.248396	-0.133005	-1.11614	1.35437	-1.26748	-1.07694	0.46128	0.503604	0.297911	-0.662789	-0.197452
ACTG1	K.MTQIMFETFN[+0.98402]TPAMYVAIQAVLSLYASGR.T_3		0.432535	0.418146	-0.483445	0.270681	-0.189971	0.309756	0.983062	0.00741918	0.00774332	5.74491e-05	-0.133005	-1.11614	1.35437	-1.26748	-1.07694	0.46128	0.503604	0.297911	-0.662789	-0.197452
ACTG1	K.MTQIMFETFNTPAM[+15.99492]YVAIQAVLSLYASGR.T_3		0.425376	-0.315665	0.50193	0.515173	-1.04724	0.412706	0.690006	0.161147	-0.243669	-0.0392665	-0.133005	-1.11614	1.35437	-1.26748	-1.07694	0.46128	0.503604	0.297911	-0.662789	-0.197452
ACTG1	K.MTQIMFETFNTPAMYVAIQAVLSLYASGR.T_2		-0.579532	-1.09567	2.61583	-3.21898	-2.9818	2.43844	0.512194	0.290565	-1.56766	-0.455507	-0.133005	-1.11614	1.35437	-1.26748	-1.07694	0.46128	0.503604	0.297911	-0.662789	-0.197452
ACTG1	K.MTQIMFETFNTPAMYVAIQAVLSLYASGR.T_3		0.192137	-0.406	0.939517	2.25793	0.814505	3.42578	0.0862212	1.06439	1.92419	2.04808	-0.133005	-1.11614	1.35437	-1.26748	-1.07694	0.46128	0.503604	0.297911	-0.662789	-0.197452
ACTG1	K.QEYDESGPSIVHR.K_2		1.63027	-2.82279	-0.313632	-2.54925	-2.25877	-1.10019	0.342219	0.465696	-1.46735	-0.683341	-0.133005	-1.11614	1.35437	-1.26748	-1.07694	0.46128	0.503604	0.297911	-0.662789	-0.197452
ACTG1	K.QEYDESGPSIVHR.K_3		1.51516	-1.96182	-0.29253	-0.341098	-0.310223	1.46053	0.681224	0.16671	0.516135	0.0860449	-0.133005	-1.11614	1.35437	-1.26748	-1.07694	0.46128	0.503604	0.297911	-0.662789	-0.197452
ACTG1	K.SYELPDGQVITIGN[+0.98402]ER.F_2		-0.16118	0.314132	0.59103	-2.46191	-2.02303	-0.509369	0.0387119	1.41216	-1.91276	-2.70112	-0.133005	-1.11614	1.35437	-1.26748	-1.07694	0.46128	0.503604	0.297911	-0.662789	-0.197452
ACTG1	K.SYELPDGQVITIGNER.F_2		0.394907	0.154224	0.153268	-1.97508	-1.78354	-0.527731	0.0226082	1.64573	-1.66291	-2.73672	-0.133005	-1.11614	1.35437	-1.26748	-1.07694	0.46128	0.503604	0.297911	-0.662789	-0.197452
ACTG1	K.SYELPDGQVITIGNER.F_3		0.220663	0.167617	0.338214	-0.740285	-0.579894	-1.23269	0.00572651	2.24211	-1.09312	-2.4509	-0.133005	-1.11614	1.35437	-1.26748	-1.07694	0.46128	0.503604	0.297911	-0.662789	-0.197452
ACTG1	K.YPIEHGIVTNWDDM[+15.99492]EK.I_2		1.19423	0.221707	-3.17274	-3.9432	-6.19194	-4.80273	0.0409462	1.38779	-4.39369	-6.0975	-0.133005	-1.11614	1.35437	-1.26748	-1.07694	0.46128	0.503604	0.297911	-0.662789	-0.197452
ACTG1	K.YPIEHGIVTNWDDM[+15.99492]EK.I_3		1.95224	-4.341	-0.839092	-0.485104	-2.32327	-3.07805	0.677135	0.169325	-0.886191	-0.150054	-0.133005	-1.11614	1.35437	-1.26748	-1.07694	0.46128	0.503604	0.297911	-0.662789	-0.197452
ACTG1	K.YSVWIGGSILASLSTFQQM[+15.99492]WISK.Q_3		-0.244096	0.156089	0.818559	0.686249	0.130618	1.85014	0.338192	0.470837	0.645484	0.303918	-0.133005	-1.11614	1.35437	-1.26748	-1.07694	0.46128	0.503604	0.297911	-0.662789	-0.197452
ACTG1	K.YSVWIGGSILASLSTFQQMWISK.Q_2		-0.263039	-0.133676	1.12179	0.476083	0.259222	1.63273	0.422709	0.373958	0.547653	0.204799	-0.133005	-1.11614	1.35437	-1.26748	-1.07694	0.46128	0.503604	0.297911	-0.662789	-0.197452
ACTG1	K.YSVWIGGSILASLSTFQQMWISK.Q_3		0.0731625	-0.251993	0.964593	-2.00565	-1.75366	-2.2181	0.0043517	2.36134	-2.25439	-5.32338	-0.133005	-1.11614	1.35437	-1.26748	-1.07694	0.46128	0.503604	0.297911	-0.662789	-0.197452
ACTG1	K.YSVWIGGSILASLSTFQQMWISKQEYDESGPSIVHR.K_4		0.684163	-1.92001	2.85936		3.64926	4.31794	0.151898	0.818449	3.44243	2.81746	-0.133005	-1.11614	1.35437		-1.07694	0.46128	0.773681	0.111438	-0.342905	-0.0382127
ACTG1	M.[+42.01056]EEEIAALVIDNGSGM[+15.99492]C[+57.02146]K.A_2		0.443493	0.426108	-0.326807	-0.879546	-1.43577	-1.27971	0.0104215	1.98207	-1.37927	-2.73381	-0.133005	-1.11614	1.35437	-1.26748	-1.07694	0.46128	0.503604	0.297911	-0.662789	-0.197452
ACTG1	M.[+42.01056]EEEIAALVIDNGSGMC[+57.02146]K.A_2		-1.33261	1.25544	0.209191	-2.26119	-1.39386	-1.05258	0.124963	0.903219	-1.61322	-1.45709	-0.133005	-1.11614	1.35437	-1.26748	-1.07694	0.46128	0.503604	0.297911	-0.662789	-0.197452
ACTG1	R.AVFPSIVGRPR.H_2		1.04012	-1.1604	0.266949	-0.129091	-0.153219	0.754165	0.886097	0.0525187	0.108396	0.00569283	-0.133005	-1.11614	1.35437	-1.26748	-1.07694	0.46128	0.503604	0.297911	-0.662789	-0.197452
ACTG1	R.C[+57.02146]PEALFQPSFLGM[+15.99492]ESC[+57.02146]GIHETTFN[+0.98402]SIM[+15.99492]K.C_3		1.14672	0.135662	-1.74913	-2.14528	-2.72712	-3.42153	0.0478383	1.32022	-2.60906	-3.44455	-0.133005	-1.11614	1.35437	-1.26748	-1.07694	0.46128	0.503604	0.297911	-0.662789	-0.197452
ACTG1	R.C[+57.02146]PEALFQPSFLGM[+15.99492]ESC[+57.02146]GIHETTFNSIM[+15.99492]K.C_2		4.93043						#DIV/0!	#DIV/0!	#DIV/0!	#DIV/0!	-0.133005						#DIV/0!	#DIV/0!	#DIV/0!	#DIV/0!
ACTG1	R.C[+57.02146]PEALFQPSFLGM[+15.99492]ESC[+57.02146]GIHETTFNSIM[+15.99492]K.C_3		1.1088	0.049212	-1.34149	-1.82627	-1.49684	-2.8224	0.0710323	1.14854	-1.98735	-2.28256	-0.133005	-1.11614	1.35437	-1.26748	-1.07694	0.46128	0.503604	0.297911	-0.662789	-0.197452
ACTG1	R.C[+57.02146]PEALFQPSFLGM[+15.99492]ESC[+57.02146]GIHETTFNSIMK.C_2		1.31167	-0.253641	-1.77376	-5.27009	-2.93463	-3.02649	0.0404354	1.39324	-3.50516	-4.88352	-0.133005	-1.11614	1.35437	-1.26748	-1.07694	0.46128	0.503604	0.297911	-0.662789	-0.197452
ACTG1	R.C[+57.02146]PEALFQPSFLGM[+15.99492]ESC[+57.02146]GIHETTFNSIMK.C_3		1.168	-0.396138	-0.921362	-2.70165	-0.853331	-0.910653	0.174656	0.757817	-1.43871	-1.09028	-0.133005	-1.11614	1.35437	-1.26748	-1.07694	0.46128	0.503604	0.297911	-0.662789	-0.197452
ACTG1	R.C[+57.02146]PEALFQPSFLGMES[+203.07937]C[+57.02146]GIHETTFNSIM[+15.99492]K.C_3	TRUE		3.43802	3.61785	-0.769634	2.19777	0.971919	0.091683	1.03771	-2.72792	-2.83079		-1.11614	1.35437	-1.26748	-1.07694	0.46128	0.5657	0.247414	-0.746829	-0.184776
ACTG1	R.C[+57.02146]PEALFQPSFLGMESC[+57.02146]GIHETTFN[+0.98402]SIM[+15.99492]K.C_3		0.44227	0.233838	-0.0763351	-0.810725	-1.30817	-0.859523	0.005479	2.2613	-1.19273	-2.69712	-0.133005	-1.11614	1.35437	-1.26748	-1.07694	0.46128	0.503604	0.297911	-0.662789	-0.197452
ACTG1	R.C[+57.02146]PEALFQPSFLGMESC[+57.02146]GIHETTFN[+0.98402]SIMK.C_3		0.634053	0.422617	-0.727809	-1.48646	-1.54937	-1.56059	0.0179294	1.74643	-1.64176	-2.86723	-0.133005	-1.11614	1.35437	-1.26748	-1.07694	0.46128	0.503604	0.297911	-0.662789	-0.197452
ACTG1	R.C[+57.02146]PEALFQPSFLGMESC[+57.02146]GIHETTFNSIM[+15.99492]K.C_3		0.849561	0.545686	-3.77953	-4.62798	-2.90289	-1.57573	0.266468	0.574355	-2.24077	-1.287	-0.133005	-1.11614	1.35437	-1.26748	-1.07694	0.46128	0.503604	0.297911	-0.662789	-0.197452
ACTG1	R.C[+57.02146]PEALFQPSFLGMESC[+57.02146]GIHETTFNSIMK.C_3		-5.99656	-0.225011	2.22042	-0.689514	0.607595	0.697925	0.568011	0.245643	1.53905	0.378057	-0.133005	-1.11614	1.35437	-1.26748	-1.07694	0.46128	0.503604	0.297911	-0.662789	-0.197452
ACTG1	R.DLTDYLM[+15.99492]K.I_1		2.17803	-3.01162	-4.34212	-3.99604	-5.3368	-6.22656	0.173374	0.761016	-3.46123	-2.63405	-0.133005	-1.11614	1.35437	-1.26748	-1.07694	0.46128	0.503604	0.297911	-0.662789	-0.197452
ACTG1	R.DLTDYLM[+15.99492]K.I_2		0.404674	-0.35374	0.599058	-1.48911	-1.41493	-0.334667	0.0518612	1.28516	-1.29623	-1.66586	-0.133005	-1.11614	1.35437	-1.26748	-1.07694	0.46128	0.503604	0.297911	-0.662789	-0.197452
ACTG1	R.EKMTQIMFETFNTPAMYVAIQAVLSLYASGR.T_3		0.121201	-1.36221	2.24705	3.57459	2.26984	1.10663	0.192832	0.714821	1.98167	1.41654	-0.133005	-1.11614	1.35437	-1.26748	-1.07694	0.46128	0.503604	0.297911	-0.662789	-0.197452
ACTG1	R.GILTLK.Y_1		0.537958	-0.218175	0.284313	-0.000807774	0.606342	0.152371	0.867085	0.0619383	0.0512696	0.00317555	-0.133005	-1.11614	1.35437	-1.26748	-1.07694	0.46128	0.503604	0.297911	-0.662789	-0.197452
ACTG1	R.GYSFTTTAER.E_2		0.783791	0.0422095	-0.383215	-0.378725	-0.743928	0.0327078	0.278864	0.554607	-0.51091	-0.283354	-0.133005	-1.11614	1.35437	-1.26748	-1.07694	0.46128	0.503604	0.297911	-0.662789	-0.197452
ACTG1	R.HQGVM[+15.99492]VGM[+15.99492]GQKDSYVGDEAQSK.R_2				9.10104	4.54649	2.75105	-1.79685	#DIV/0!	#DIV/0!	-7.26747	#DIV/0!			1.35437	-1.26748	-1.07694	0.46128	#DIV/0!	#DIV/0!	-1.98208	#DIV/0!
ACTG1	R.HQGVM[+15.99492]VGM[+15.99492]GQKDSYVGDEAQSK.R_3		-2.57612	0.420322	1.57267	-0.796386	2.14708	-1.55327	0.943241	0.0253775	0.126848	0.00321909	-0.133005	-1.11614	1.35437	-1.26748	-1.07694	0.46128	0.503604	0.297911	-0.662789	-0.197452
ACTG1	R.HQGVM[+15.99492]VGM[+15.99492]GQKDSYVGDEAQSKR.G_4		-9.19405	-4.37522	2.71924	1.86015	4.93271	1.65611	0.150076	0.823688	6.433	5.29878	-0.133005	-1.11614	1.35437	-1.26748	-1.07694	0.46128	0.503604	0.297911	-0.662789	-0.197452
ACTG1	R.HQGVMVGMGQK.D_2		-2.10548	0.448672	1.39487	-2.10427	-0.55852	-0.972768	0.380861	0.419234	-1.12454	-0.471444	-0.133005	-1.11614	1.35437	-1.26748	-1.07694	0.46128	0.503604	0.297911	-0.662789	-0.197452
ACTG1	R.KDLYAN[+0.98402]TVLSGGTTM[+15.99492]YPGIADR.M_2		-0.523423	0.885896	0.197008	-0.552804	-0.879815	-0.724831	0.0959993	1.01773	-0.905644	-0.921702	-0.133005	-1.11614	1.35437	-1.26748	-1.07694	0.46128	0.503604	0.297911	-0.662789	-0.197452
ACTG1	R.KDLYAN[+0.98402]TVLSGGTTM[+15.99492]YPGIADR.M_3		-0.126767	0.493313	0.346254	-1.85519	-1.89708	-1.41437	0.00127469	2.8946	-1.95981	-5.67286	-0.133005	-1.11614	1.35437	-1.26748	-1.07694	0.46128	0.503604	0.297911	-0.662789	-0.197452
ACTG1	R.KDLYANTVLSGGTTM[+15.99492]YPGIADR.M_2		0.553531	0.36239	-0.435881	0.970313	0.0260128	-0.400655	0.942923	0.0255239	0.0385437	0.000983784	-0.133005	-1.11614	1.35437	-1.26748	-1.07694	0.46128	0.503604	0.297911	-0.662789	-0.197452
ACTG1	R.KDLYANTVLSGGTTM[+15.99492]YPGIADR.M_3		0.325304	0.175166	0.202996	0.133751	-0.200666	-0.673092	0.113883	0.943541	-0.481158	-0.453992	-0.133005	-1.11614	1.35437	-1.26748	-1.07694	0.46128	0.503604	0.297911	-0.662789	-0.197452
ACTG1	R.KDLYANTVLSGGTTMYPGIADR.M_2		0.853194	-0.0789038	-7.01685	0.348931	0.287394	-0.0372525	0.41078	0.386391	2.28054	0.881182	-0.133005	-1.11614	1.35437	-1.26748	-1.07694	0.46128	0.503604	0.297911	-0.662789	-0.197452
ACTG1	R.KDLYANTVLSGGTTMYPGIADR.M_3		-2.88411	0.817858	1.20789	1.6123	0.986853	2.59416	0.219043	0.659471	2.01723	1.3303	-0.133005	-1.11614	1.35437	-1.26748	-1.07694	0.46128	0.503604	0.297911	-0.662789	-0.197452
ACTG1	R.KYSVWIGGSILASLSTFQQMWISK.Q_3		0.696058	-0.539625	0.286897	3.39872	-0.883258	2.06165	0.354168	0.450791	1.37793	0.621157	-0.133005	-1.11614	1.35437	-1.26748	-1.07694	0.46128	0.503604	0.297911	-0.662789	-0.197452
ACTG1	R.M[+15.99492]QKEITALAPSTM[+15.99492]K.I_2		-1.80646	1.92964	-1.06698	2.87362	1.28426	-0.730031	0.399431	0.398558	1.45722	0.580786	-0.133005	-1.11614	1.35437	-1.26748	-1.07694	0.46128	0.503604	0.297911	-0.662789	-0.197452
ACTG1	R.TTGIVM[+15.99492]DSGDGVTHTVPIYEGYALPHAILR.L_2		1.75603	-2.37707	-0.636742	-3.81966	1.25265	-2.42043	0.554457	0.256132	-1.24322	-0.318429	-0.133005	-1.11614	1.35437	-1.26748	-1.07694	0.46128	0.503604	0.297911	-0.662789	-0.197452
ACTG1	R.TTGIVM[+15.99492]DSGDGVTHTVPIYEGYALPHAILR.L_3		0.328556	-0.0406797	0.399957	-1.66651	-1.18621	-1.09845	0.00227839	2.64237	-1.54634	-4.086	-0.133005	-1.11614	1.35437	-1.26748	-1.07694	0.46128	0.503604	0.297911	-0.662789	-0.197452
ACTG1	R.TTGIVM[+15.99492]DSGDGVTHTVPIYEGYALPHAILR.L_4		0.255796	0.612943	-0.272287	-1.88409	-0.934064	-0.653814	0.0400464	1.39744	-1.35614	-1.89512	-0.133005	-1.11614	1.35437	-1.26748	-1.07694	0.46128	0.503604	0.297911	-0.662789	-0.197452
ACTG1	R.TTGIVM[+15.99492]DSGDGVTHTVPIYEGYALPHAILR.L_5		0.858606	-0.827208	0.340705	2.09834	3.20983	0.473941	0.126867	0.896651	1.80334	1.61696	-0.133005	-1.11614	1.35437	-1.26748	-1.07694	0.46128	0.503604	0.297911	-0.662789	-0.197452
ACTG1	R.TTGIVMDSGDGVTHTVPIYEGYALPHAILR.L_3		-2.55611	1.10186	0.888145	-0.50306	0.879431	1.50759	0.571213	0.243202	0.816691	0.198621	-0.133005	-1.11614	1.35437	-1.26748	-1.07694	0.46128	0.503604	0.297911	-0.662789	-0.197452
ACTG1	R.TTGIVMDSGDGVTHTVPIYEGYALPHAILR.L_4		-1.3953	0.76765	0.870604	0.210147	1.06766	0.815221	0.474095	0.324135	0.616694	0.199892	-0.133005	-1.11614	1.35437	-1.26748	-1.07694	0.46128	0.503604	0.297911	-0.662789	-0.197452
ACTG1	R.VAPEEHPVLLTEAPLN[+0.98402]PK.A_2		0.915455	-1.00709	0.379657	-0.500495	-0.409525	-0.100728	0.500674	0.300445	-0.432924	-0.13007	-0.133005	-1.11614	1.35437	-1.26748	-1.07694	0.46128	0.503604	0.297911	-0.662789	-0.197452
ACTG1	R.VAPEEHPVLLTEAPLN[+0.98402]PK.A_3		1.13706	-1.30322	0.189066	-1.85639	-2.20749	-0.805543	0.119497	0.922642	-1.63078	-1.50462	-0.133005	-1.11614	1.35437	-1.26748	-1.07694	0.46128	0.503604	0.297911	-0.662789	-0.197452
ACTG1	R.VAPEEHPVLLTEAPLNPK.A_2		0.724736	-0.124339	-0.0969743	-1.07839	-0.985222	-1.50801	0.013459	1.87099	-1.35835	-2.54145	-0.133005	-1.11614	1.35437	-1.26748	-1.07694	0.46128	0.503604	0.297911	-0.662789	-0.197452
ACTG1	R.VAPEEHPVLLTEAPLNPK.A_3		-0.0979311	0.347487	0.462796	-1.11305	-1.15281	-0.174113	0.0442256	1.35433	-1.05077	-1.42309	-0.133005	-1.11614	1.35437	-1.26748	-1.07694	0.46128	0.503604	0.297911	-0.662789	-0.197452
ACTL6A	K.IPEGLFDPSN[+0.98402]VK.G_2		-0.526422	0.902878	0.178703	-0.90654	-1.50441	-0.403971	0.0972968	1.0119	-1.12336	-1.13673	-0.350524	1.44831	-0.887858	0.267046	1.27177	-0.464717	0.75649	0.121197	0.288056	0.0349115
ACTL6A	K.IPEGLFDPSNVK.G_2		0.600274	-0.624278	0.544054	-0.253215	-0.256739	-0.213961	0.357792	0.446369	-0.414655	-0.185089	-0.350524	1.44831	-0.887858	0.267046	1.27177	-0.464717	0.75649	0.121197	0.288056	0.0349115
ACTL6A	K.LIANNTTVER.R_2		0.577966	0.304032	-0.409238	-1.34476	-1.11419	-1.43992	0.00927458	2.03271	-1.45721	-2.96208	-0.350524	1.44831	-0.887858	0.267046	1.27177	-0.464717	0.75649	0.121197	0.288056	0.0349115
ACTL6A	K.VDFPTAIGM[+15.99492]VVER.D_2		-0.525564	1.22259	-0.418101	-0.217886	-0.499388	-0.542964	0.422498	0.374175	-0.513053	-0.191972	-0.350524	1.44831	-0.887858	0.267046	1.27177	-0.464717	0.75649	0.121197	0.288056	0.0349115
ACTL6A	R.ELFQEM[+15.99492]NIELVPPYM[+15.99492]IASK.E_2		0.906954	2.91048			7.42705	9.55763	0.0459602	1.33762	6.58363	8.80638	-0.350524	1.44831			1.27177	-0.464717	0.918052	0.0371326	-0.145367	-0.00539788
ACTL6A	R.ELFQEMN[+0.98402]IELVPPYMIASK.E_2		0.0313462	0.893978	-0.696683	-1.12017	-1.75136	-1.69586	0.0334007	1.47624	-1.59868	-2.36004	-0.350524	1.44831	-0.887858	0.267046	1.27177	-0.464717	0.75649	0.121197	0.288056	0.0349115
ACTL6A	R.STGLILDSGATHTTAIPVHDGYVLQQGIVK.S_4		-0.486123	1.50137	-1.47682	4.7777	5.95567	2.93291	0.0191989	1.71672	4.70929	8.08455	-0.350524	1.44831	-0.887858	0.267046	1.27177	-0.464717	0.75649	0.121197	0.288056	0.0349115
ACTN1	-.[+42.01056]M[+15.99492]DHYDSQQTNDYM[+15.99492]QPEEDWDRDLLLDPAWEK.Q_3		1.70337	-1.04158	-2.57846	-4.34956	-5.36277	-3.74489	0.0452695	1.34419	-3.84685	-5.17092	-0.186028	0.211527	-0.0620251	-0.547814	-0.0991886	0.0358332	0.417183	0.379673	-0.191548	-0.0727256
ACTN1	-.[+42.01056]M[+15.99492]DHYDSQQTNDYM[+15.99492]QPEEDWDRDLLLDPAWEK.Q_4		1.01921	0.022876	-1.42315	-2.52768	-2.49522	-3.4103	0.0251971	1.59865	-2.68405	-4.29086	-0.186028	0.211527	-0.0620251	-0.547814	-0.0991886	0.0358332	0.417183	0.379673	-0.191548	-0.0727256
ACTN1	-.[+42.01056]MDHYDSQQTNDYM[+15.99492]QPEEDWDRDLLLDPAWEK.Q_3				8.43897			-0.0347347	#DIV/0!	#DIV/0!	-8.4737	#DIV/0!			-0.0620251			0.0358332	#DIV/0!	#DIV/0!	0.0978583	#DIV/0!
ACTN1	K.AC[+57.02146]LISLGYDIGNDPQGEAEFAR.I_2		4.50887		1.32183	3.42155	1.47753	1.84296	0.669194	0.174448	-0.668006	-0.116532	-0.186028		-0.0620251	-0.547814	-0.0991886	0.0358332	0.754255	0.122482	-0.0796967	-0.00976139
ACTN1	K.AGTQIENIEEDFR.D_2		0.299998	0.49829	-0.208788	-0.691487	-2.33836	-2.24901	0.027178	1.56578	-1.95612	-3.06286	-0.186028	0.211527	-0.0620251	-0.547814	-0.0991886	0.0358332	0.417183	0.379673	-0.191548	-0.0727256
ACTN1	K.AGTQIENIEEDFRDGLK.L_2		0.246525	-1.18924	1.25258	0.015288	-1.89183	-0.634527	0.356508	0.44793	-0.940313	-0.421195	-0.186028	0.211527	-0.0620251	-0.547814	-0.0991886	0.0358332	0.417183	0.379673	-0.191548	-0.0727256
ACTN1	K.AGTQIENIEEDFRDGLK.L_3		1.13081	-0.675224	-0.279575	0.784906	-1.1954	0.612652	0.992196	0.00340264	0.00871582	2.96568e-05	-0.186028	0.211527	-0.0620251	-0.547814	-0.0991886	0.0358332	0.417183	0.379673	-0.191548	-0.0727256
ACTN1	K.DDPLTNLNTAFDVAEK.Y_2		-1.60237	0.529246	1.20534	-0.805525	-0.906199	-0.157481	0.489651	0.310113	-0.667143	-0.20689	-0.186028	0.211527	-0.0620251	-0.547814	-0.0991886	0.0358332	0.417183	0.379673	-0.191548	-0.0727256
ACTN1	K.DDPLTNLNTAFDVAEK.Y_3		-0.281417	1.43518	-2.52475	2.36971	3.03679	3.0902	0.0482165	1.3168	3.28923	4.33127	-0.186028	0.211527	-0.0620251	-0.547814	-0.0991886	0.0358332	0.417183	0.379673	-0.191548	-0.0727256
ACTN1	K.DGLGFC[+57.02146]ALIHR.H_2		1.14716	-0.861686	-0.146338	-1.21009	-1.93995	-1.52369	0.0621058	1.20687	-1.60429	-1.93616	-0.186028	0.211527	-0.0620251	-0.547814	-0.0991886	0.0358332	0.417183	0.379673	-0.191548	-0.0727256
ACTN1	K.GISQEQM[+15.99492]NEFR.A_2		-0.521365	1.33269	-0.645562	-0.356942	-0.171792	-0.335548	0.621332	0.206676	-0.343347	-0.0709617	-0.186028	0.211527	-0.0620251	-0.547814	-0.0991886	0.0358332	0.417183	0.379673	-0.191548	-0.0727256
ACTN1	K.IC[+57.02146]DQWDNLGALTQK.R_2		-0.190828	-1.46316	1.66174	3.63263	3.09446	3.57421	0.02053	1.68761	3.43118	5.7905	-0.186028	0.211527	-0.0620251	-0.547814	-0.0991886	0.0358332	0.417183	0.379673	-0.191548	-0.0727256
ACTN1	K.IDQLEGDHQLIQEALIFDN[+0.98402]K.H_2		-1.15389	1.08819	0.367793	-0.0113876	-0.543181	0.0199881	0.705015	0.151802	-0.278892	-0.0423363	-0.186028	0.211527	-0.0620251	-0.547814	-0.0991886	0.0358332	0.417183	0.379673	-0.191548	-0.0727256
ACTN1	K.IDQLEGDHQLIQEALIFDN[+0.98402]K.H_3		-1.46349	2.01472	-2.7679	-1.12489	0.839979	-1.3102	0.902279	0.0446591	0.207186	0.00925274	-0.186028	0.211527	-0.0620251	-0.547814	-0.0991886	0.0358332	0.417183	0.379673	-0.191548	-0.0727256
ACTN1	K.IDQLEGDHQLIQEALIFDNK.H_2		-2.55691	1.27972	0.684414	-0.559482	-0.765297	0.225137	0.897357	0.0470346	-0.168955	-0.00794674	-0.186028	0.211527	-0.0620251	-0.547814	-0.0991886	0.0358332	0.417183	0.379673	-0.191548	-0.0727256
ACTN1	K.IDQLEGDHQLIQEALIFDNK.H_3		-0.0614948	0.234967	0.569404	-1.56713	-0.947685	-0.858785	0.00885703	2.05271	-1.37216	-2.81665	-0.186028	0.211527	-0.0620251	-0.547814	-0.0991886	0.0358332	0.417183	0.379673	-0.191548	-0.0727256
ACTN1	K.ILAGDKNYITM[+15.99492]DELR.R_2		0.819562	-0.346395	-0.000739753	4.52021	3.85392	-0.630397	0.216647	0.664247	2.42377	1.60998	-0.186028	0.211527	-0.0620251	-0.547814	-0.0991886	0.0358332	0.417183	0.379673	-0.191548	-0.0727256
ACTN1	K.IVQTYHVNM[+15.99492]AGTNPYTTITPQEIN[+0.98402]GK.W_2		-5.49189	2.09876	-10.9224	-3.69086	1.83897	-9.44062	0.849707	0.0707306	1.00768	0.0712735	-0.186028	0.211527	-0.0620251	-0.547814	-0.0991886	0.0358332	0.417183	0.379673	-0.191548	-0.0727256
ACTN1	K.IVQTYHVNM[+15.99492]AGTNPYTTITPQEIN[+0.98402]GK.W_3		1.77701	-1.41911	-1.72636	-1.55039	0.827855	-0.813889	0.968257	0.0140091	-0.055989	-0.000784357	-0.186028	0.211527	-0.0620251	-0.547814	-0.0991886	0.0358332	0.417183	0.379673	-0.191548	-0.0727256
ACTN1	K.IVQTYHVNM[+15.99492]AGTNPYTTITPQEINGK.W_3		1.56713	-1.0713	-1.15345	1.77187	3.50564	1.6595	0.0780703	1.10751	2.53154	2.80372	-0.186028	0.211527	-0.0620251	-0.547814	-0.0991886	0.0358332	0.417183	0.379673	-0.191548	-0.0727256
ACTN1	K.IVQTYHVNMAGTNPYTTITPQEIN[+0.98402]GK.W_3		-0.122655	0.104955	0.726879	0.948221	0.614915	1.41193	0.0926564	1.03312	0.755296	0.780314	-0.186028	0.211527	-0.0620251	-0.547814	-0.0991886	0.0358332	0.417183	0.379673	-0.191548	-0.0727256
ACTN1	K.LLETIDQLYLEYAK.R_2		-0.184105	1.10072	-0.568823	-0.934111	-0.979695	-0.766874	0.1183	0.927017	-1.00949	-0.935814	-0.186028	0.211527	-0.0620251	-0.547814	-0.0991886	0.0358332	0.417183	0.379673	-0.191548	-0.0727256
ACTN1	K.LLETIDQLYLEYAK.R_3		0.375678	0.314794	-0.177693	0.636786	0.641318	-1.10848	0.859996	0.0655036	-0.114385	-0.00749265	-0.186028	0.211527	-0.0620251	-0.547814	-0.0991886	0.0358332	0.417183	0.379673	-0.191548	-0.0727256
ACTN1	K.LVSIGAEEIVDGN[+0.98402]VK.M_2		-1.32803	1.11487	0.429442	0.575031	1.06843	0.720916	0.389226	0.409798	0.716031	0.293428	-0.186028	0.211527	-0.0620251	-0.547814	-0.0991886	0.0358332	0.417183	0.379673	-0.191548	-0.0727256
ACTN1	K.LVSIGAEEIVDGNVK.M_2		-0.235269	0.990738	-0.29206	-0.657149	-0.337715	-0.848557	0.158478	0.800032	-0.768943	-0.615179	-0.186028	0.211527	-0.0620251	-0.547814	-0.0991886	0.0358332	0.417183	0.379673	-0.191548	-0.0727256
ACTN1	K.M[+15.99492]LDAEDIVGTARPDEK.A_2		0.760821	-0.812127	0.466357	3.01308	2.26982	1.7971	0.0206293	1.68552	2.22165	3.74463	-0.186028	0.211527	-0.0620251	-0.547814	-0.0991886	0.0358332	0.417183	0.379673	-0.191548	-0.0727256
ACTN1	K.M[+15.99492]LDAEDIVGTARPDEK.A_3		-0.0027166	0.367131	0.38798	-1.74717	0.579126	-0.06374	0.401339	0.396489	-0.661392	-0.262234	-0.186028	0.211527	-0.0620251	-0.547814	-0.0991886	0.0358332	0.417183	0.379673	-0.191548	-0.0727256
ACTN1	K.MLDAEDIVGTARPDEK.A_3		0.456604	-0.338151	0.495901	-0.638802	-1.0836	-0.401817	0.0537306	1.26978	-0.912858	-1.15913	-0.186028	0.211527	-0.0620251	-0.547814	-0.0991886	0.0358332	0.417183	0.379673	-0.191548	-0.0727256
ACTN1	K.NVNIQNFHISWK.D_2		-0.163892	-0.771742	1.34232	0.170576	-0.519335	0.402435	0.872254	0.0593572	-0.117671	-0.0069846	-0.186028	0.211527	-0.0620251	-0.547814	-0.0991886	0.0358332	0.417183	0.379673	-0.191548	-0.0727256
ACTN1	K.NVNIQNFHISWK.D_3		-0.0313525	-0.270703	0.993934	-0.3249	-0.880898	0.174539	0.308995	0.510049	-0.574379	-0.292962	-0.186028	0.211527	-0.0620251	-0.547814	-0.0991886	0.0358332	0.417183	0.379673	-0.191548	-0.0727256
ACTN1	K.NYITM[+15.99492]DELR.R_2		0.844559	-0.026217	-0.405208	2.01599	1.72794	3.60832	0.0287599	1.54121	2.31304	3.56489	-0.186028	0.211527	-0.0620251	-0.547814	-0.0991886	0.0358332	0.417183	0.379673	-0.191548	-0.0727256
ACTN1	K.QFGAQANVIGPWIQTK.M_2		0.118212	0.185012	0.428699	1.05645	1.19184	1.16445	0.00097172	3.01246	0.893605	2.69195	-0.186028	0.211527	-0.0620251	-0.547814	-0.0991886	0.0358332	0.417183	0.379673	-0.191548	-0.0727256
ACTN1	K.VLAVNQEN[+0.98402]EQLM[+15.99492]EDYEK.L_2			4.7024	0.589506			2.91555	#DIV/0!	#DIV/0!	0.269591	#DIV/0!		0.211527	-0.0620251			0.0358332	#DIV/0!	#DIV/0!	-0.0389177	#DIV/0!
ACTN1	K.VLAVNQENEQLM[+15.99492]EDYEK.L_2		-0.460694	1.04518	-0.0963867	-1.2106	0.887412	-1.21869	0.463032	0.334389	-0.676662	-0.226268	-0.186028	0.211527	-0.0620251	-0.547814	-0.0991886	0.0358332	0.417183	0.379673	-0.191548	-0.0727256
ACTN1	K.VLAVNQENEQLM[+15.99492]EDYEK.L_3		-1.75746	0.173237	1.57189	5.65583	2.48873	7.04837	0.0378246	1.42223	5.06842	7.20844	-0.186028	0.211527	-0.0620251	-0.547814	-0.0991886	0.0358332	0.417183	0.379673	-0.191548	-0.0727256
ACTN1	K.VLAVNQENEQLMEDYEK.L_2		-1.13998	0.744906	0.792289	-1.42866	0.148847	1.82669	0.967048	0.0145522	0.0498899	0.000726006	-0.186028	0.211527	-0.0620251	-0.547814	-0.0991886	0.0358332	0.417183	0.379673	-0.191548	-0.0727256
ACTN1	K.VLAVNQENEQLMEDYEK.L_3		0.555051	-0.684317	0.648042	-1.07991	0.680366	-1.4229	0.373846	0.427307	-0.780405	-0.333473	-0.186028	0.211527	-0.0620251	-0.547814	-0.0991886	0.0358332	0.417183	0.379673	-0.191548	-0.0727256
ACTN1	R.ASFNHFDRDHSGTLGPEEFK.A_2		-3.44232	0.866587	1.36771	-2.19655	2.63945	2.11973	0.59241	0.227378	1.25688	0.285787	-0.186028	0.211527	-0.0620251	-0.547814	-0.0991886	0.0358332	0.417183	0.379673	-0.191548	-0.0727256
ACTN1	R.ASFNHFDRDHSGTLGPEEFK.A_3		-0.711204	0.500431	0.791489	-1.31739	0.316971	0.601104	0.687309	0.162848	-0.326678	-0.0531987	-0.186028	0.211527	-0.0620251	-0.547814	-0.0991886	0.0358332	0.417183	0.379673	-0.191548	-0.0727256
ACTN1	R.ASFNHFDRDHSGTLGPEEFK.A_4		-4.92345	0.679027	1.35703	-0.0280668	0.343654	-2.37969	0.905252	0.0432305	0.274431	0.0118638	-0.186028	0.211527	-0.0620251	-0.547814	-0.0991886	0.0358332	0.417183	0.379673	-0.191548	-0.0727256
ACTN1	R.DHSGTLGPEEFK.A_2		-0.97176	0.91299	0.477397	-1.29063	-1.89146	-0.43249	0.131125	0.882314	-1.3444	-1.18619	-0.186028	0.211527	-0.0620251	-0.547814	-0.0991886	0.0358332	0.417183	0.379673	-0.191548	-0.0727256
ACTN1	R.ETADTDTADQVM[+15.99492]ASFK.I_2		-0.57957	0.961189	0.117216	-2.69973	-1.97238	0.144095	0.156599	0.80521	-1.67562	-1.34922	-0.186028	0.211527	-0.0620251	-0.547814	-0.0991886	0.0358332	0.417183	0.379673	-0.191548	-0.0727256
ACTN1	R.ETADTDTADQVMASFK.I_2		-0.730027	1.35249	-0.480007	0.599726	0.825047	1.92077	0.239323	0.621015	1.06769	0.663054	-0.186028	0.211527	-0.0620251	-0.547814	-0.0991886	0.0358332	0.417183	0.379673	-0.191548	-0.0727256
ACTN1	R.HRPELIDYGK.L_2		-0.186564	-0.0962643	0.930236	-2.97201	-2.86208	-1.11625	0.0223686	1.65036	-2.53258	-4.17968	-0.186028	0.211527	-0.0620251	-0.547814	-0.0991886	0.0358332	0.417183	0.379673	-0.191548	-0.0727256
ACTN1	R.IM[+15.99492]SIVDPNR.L_2		0.0291129	0.530651	0.119919	-1.63754	-1.33018	-0.736895	0.00880784	2.05513	-1.46143	-3.00344	-0.186028	0.211527	-0.0620251	-0.547814	-0.0991886	0.0358332	0.417183	0.379673	-0.191548	-0.0727256
ACTN1	R.ISIEM[+15.99492]HGTLEDQLSHLR.Q_2		0.0273151	0.533066	0.070606	-0.31466	0.808686	1.52983	0.454063	0.342884	0.46429	0.159198	-0.186028	0.211527	-0.0620251	-0.547814	-0.0991886	0.0358332	0.417183	0.379673	-0.191548	-0.0727256
ACTN1	R.ISIEM[+15.99492]HGTLEDQLSHLR.Q_3		0.846655	0.0484307	-0.525474	-1.25125	-2.6981	-1.51987	0.0309864	1.50883	-1.94628	-2.9366	-0.186028	0.211527	-0.0620251	-0.547814	-0.0991886	0.0358332	0.417183	0.379673	-0.191548	-0.0727256
ACTN1	R.KAGTQIENIEEDFR.D_2		-0.195429	-0.19216	1.0086	-0.244436	-0.329002	-0.390581	0.260079	0.584895	-0.528343	-0.309025	-0.186028	0.211527	-0.0620251	-0.547814	-0.0991886	0.0358332	0.417183	0.379673	-0.191548	-0.0727256
ACTN1	R.KAGTQIENIEEDFR.D_3		0.587302	0.303767	-0.406805	0.331369	1.01618	-0.869127	0.997664	0.00101567	-0.00194757	-1.9781e-06	-0.186028	0.211527	-0.0620251	-0.547814	-0.0991886	0.0358332	0.417183	0.379673	-0.191548	-0.0727256
ACTN1	R.KAGTQIENIEEDFRDGLK.L_2		1.19818	-0.14311	-1.33262	6.48909	5.2365	3.80767	0.00777117	2.10951	5.27027	11.1177	-0.186028	0.211527	-0.0620251	-0.547814	-0.0991886	0.0358332	0.417183	0.379673	-0.191548	-0.0727256
ACTN1	R.KAGTQIENIEEDFRDGLK.L_3		0.0115719	0.660579	-0.044107	5.71369	4.47096	1.3445	0.0511495	1.29116	3.6337	4.69169	-0.186028	0.211527	-0.0620251	-0.547814	-0.0991886	0.0358332	0.417183	0.379673	-0.191548	-0.0727256
ACTN1	R.KAGTQIENIEEDFRDGLK.L_4		-0.573337	1.0233	-0.0192386	4.28487	2.30526	-1.74504	0.467612	0.330115	1.47145	0.485748	-0.186028	0.211527	-0.0620251	-0.547814	-0.0991886	0.0358332	0.417183	0.379673	-0.191548	-0.0727256
ACTN1	R.KDDPLTNLNTAFDVAEK.Y_2		0.656769	-0.209399	0.150389	0.551799	-0.422315	-0.442976	0.503159	0.298294	-0.30375	-0.090607	-0.186028	0.211527	-0.0620251	-0.547814	-0.0991886	0.0358332	0.417183	0.379673	-0.191548	-0.0727256
ACTN1	R.KDDPLTNLNTAFDVAEK.Y_3		-0.079379	0.156029	0.677041	-0.19179	-0.698765	0.0417959	0.162693	0.788631	-0.53415	-0.421248	-0.186028	0.211527	-0.0620251	-0.547814	-0.0991886	0.0358332	0.417183	0.379673	-0.191548	-0.0727256
ACTN1	R.KQFGAQANVIGPWIQTK.M_2		1.96152	-3.2579	-0.757806	-2.72406	-2.77311	-1.2571	0.379458	0.420837	-1.56669	-0.659323	-0.186028	0.211527	-0.0620251	-0.547814	-0.0991886	0.0358332	0.417183	0.379673	-0.191548	-0.0727256
ACTN1	R.KQFGAQANVIGPWIQTK.M_3		-0.191928	0.926909	-0.255263	0.219613	-0.13961	0.611075	0.880789	0.0551283	0.0704535	0.00388398	-0.186028	0.211527	-0.0620251	-0.547814	-0.0991886	0.0358332	0.417183	0.379673	-0.191548	-0.0727256
ACTN1	R.LAILGIHN[+0.98402]EVSK.I_2		0.0819357	-1.10503	1.32124	-0.123256	-2.93968	-1.08662	0.242981	0.614427	-1.48256	-0.910927	-0.186028	0.211527	-0.0620251	-0.547814	-0.0991886	0.0358332	0.417183	0.379673	-0.191548	-0.0727256
ACTN1	R.LAILGIHNEVSK.I_2		0.509451	-0.0335402	0.160001	1.23296	1.06849	0.257957	0.132966	0.87626	0.641166	0.561828	-0.186028	0.211527	-0.0620251	-0.547814	-0.0991886	0.0358332	0.417183	0.379673	-0.191548	-0.0727256
ACTN1	R.LSNRPAFM[+15.99492]PSEGR.M_2		0.20512	0.377572	0.114439	-2.05582	-1.44922	-1.15906	0.00290146	2.53738	-1.78708	-4.5345	-0.186028	0.211527	-0.0620251	-0.547814	-0.0991886	0.0358332	0.417183	0.379673	-0.191548	-0.0727256
ACTN1	R.M[+15.99492]APYTGPDSVPGALDYM[+15.99492]SFSTALYGESDL.-_3		-0.459052	0.489119	0.574022	0.486608	1.23322	0.733109	0.195836	0.708108	0.616283	0.436395	-0.186028	0.211527	-0.0620251	-0.547814	-0.0991886	0.0358332	0.417183	0.379673	-0.191548	-0.0727256
ACTN1	R.M[+15.99492]VSDINNAWGC[+57.02146]LEQVEK.G_2		0.62366	0.367174	-0.601099	-1.58434	-0.693104	0.168501	0.255794	0.592109	-0.832891	-0.493162	-0.186028	0.211527	-0.0620251	-0.547814	-0.0991886	0.0358332	0.417183	0.379673	-0.191548	-0.0727256
ACTN1	R.MAPYTGPDSVPGALDYMSFSTALYGESDL.-_3		-1.4199	-0.0226632	1.90715	1.69305	2.26097	3.21386	0.103116	0.986676	2.23443	2.20466	-0.186028	0.211527	-0.0620251	-0.547814	-0.0991886	0.0358332	0.417183	0.379673	-0.191548	-0.0727256
ACTN1	R.MVSDINNAWGC[+57.02146]LEQVEK.G_2		1.42513	-0.115054	-3.7685	-2.45805	-3.66084	-1.17677	0.396317	0.401958	-1.61241	-0.648122	-0.186028	0.211527	-0.0620251	-0.547814	-0.0991886	0.0358332	0.417183	0.379673	-0.191548	-0.0727256
ACTN1	R.QKDYETATLSEIK.A_2		1.39443	-0.852843	-0.765514	-3.04205	-2.62425	-1.63895	0.0490572	1.3093	-2.36044	-3.09052	-0.186028	0.211527	-0.0620251	-0.547814	-0.0991886	0.0358332	0.417183	0.379673	-0.191548	-0.0727256
ACTN1	R.QKDYETATLSEIK.A_3		0.500573	-0.760843	0.743459	-0.625216	-0.851506	-0.0704236	0.263608	0.579042	-0.676778	-0.391883	-0.186028	0.211527	-0.0620251	-0.547814	-0.0991886	0.0358332	0.417183	0.379673	-0.191548	-0.0727256
ACTN1	R.TIPWLENR.V_2		0.464777	-1.81651	1.26277	0.435491	-1.13398	0.963284	0.921019	0.0357316	0.117915	0.0042133	-0.186028	0.211527	-0.0620251	-0.547814	-0.0991886	0.0358332	0.417183	0.379673	-0.191548	-0.0727256
ACTN1	R.VEQIAAIAQELN[+0.98402]ELDYYDSPSVNAR.C_2				5.77801				#DIV/0!	#DIV/0!	#DIV/0!	#DIV/0!			-0.0620251				#DIV/0!	#DIV/0!	#DIV/0!	#DIV/0!
ACTN1	R.VEQIAAIAQELN[+0.98402]ELDYYDSPSVNAR.C_3		-1.11229	0.901201	0.604298	-1.83537	-2.15867	-1.13042	0.0576839	1.23895	-1.83922	-2.27869	-0.186028	0.211527	-0.0620251	-0.547814	-0.0991886	0.0358332	0.417183	0.379673	-0.191548	-0.0727256
ACTN1	R.VEQIAAIAQELNELDYYDSPSVN[+0.98402]AR.C_2		0.840982	0.0364344	-0.60118	-2.72433	-1.71385	-1.74013	0.0157013	1.80406	-2.15151	-3.88147	-0.186028	0.211527	-0.0620251	-0.547814	-0.0991886	0.0358332	0.417183	0.379673	-0.191548	-0.0727256
ACTN1	R.VEQIAAIAQELNELDYYDSPSVN[+0.98402]AR.C_3		0.0822141	0.80236	-0.436461	-2.59195	-2.37573	-1.72076	0.00588042	2.23059	-2.37885	-5.30624	-0.186028	0.211527	-0.0620251	-0.547814	-0.0991886	0.0358332	0.417183	0.379673	-0.191548	-0.0727256
ACTN1	R.VEQIAAIAQELNELDYYDSPSVNAR.C_2		-0.075134	0.867736	-0.414873	-1.42778	-0.409196	-0.887556	0.0992211	1.0034	-1.03409	-1.0376	-0.186028	0.211527	-0.0620251	-0.547814	-0.0991886	0.0358332	0.417183	0.379673	-0.191548	-0.0727256
ACTN1	R.VEQIAAIAQELNELDYYDSPSVNAR.C_3		1.0396	0.0115974	-1.05759	-2.86043	-3.027	-2.53065	0.0108031	1.96645	-2.8039	-5.51373	-0.186028	0.211527	-0.0620251	-0.547814	-0.0991886	0.0358332	0.417183	0.379673	-0.191548	-0.0727256
ACTN1	R.VEQIAAIAQELNELDYYDSPSVNAR.C_4		0.320342	0.353589	-0.224674	-1.81379	-1.36702	-1.69474	0.00152235	2.81748	-1.77494	-5.00085	-0.186028	0.211527	-0.0620251	-0.547814	-0.0991886	0.0358332	0.417183	0.379673	-0.191548	-0.0727256
ACTN4	K.AC[+57.02146]LISLGYDVENDR.Q_2		0.922873	-1.03603	0.401882	-0.507574	-1.54628	-1.07928	0.158181	0.800847	-1.14062	-0.913463	0.564841	-0.514836	0.405058	-0.777152	-1.45317	-0.0582649	0.156336	0.805942	-0.914551	-0.737076
ACTN4	K.AGTQIENIDEDFR.D_2		-0.359178	0.161866	0.840935	1.19928	0.281452	-0.116084	0.669094	0.174513	0.24034	0.0419424	0.564841	-0.514836	0.405058	-0.777152	-1.45317	-0.0582649	0.156336	0.805942	-0.914551	-0.737076
ACTN4	K.AGTQIENIDEDFRDGLK.L_2		0.22254	0.453105	-0.025011	-2.82711	-3.78726	-2.75345	0.000755065	3.12202	-3.33948	-10.4259	0.564841	-0.514836	0.405058	-0.777152	-1.45317	-0.0582649	0.156336	0.805942	-0.914551	-0.737076
ACTN4	K.AGTQIENIDEDFRDGLK.L_3		1.44124	-1.6362	-0.223984	-1.43639	-2.32856	-1.50421	0.158661	0.799531	-1.61674	-1.29263	0.564841	-0.514836	0.405058	-0.777152	-1.45317	-0.0582649	0.156336	0.805942	-0.914551	-0.737076
ACTN4	K.AIM[+15.99492]TYVSSFYHAFSGAQK.A_2		1.00295	-0.101868	-0.723373	-0.523516	-0.642105	0.0303372	0.467476	0.330241	-0.437665	-0.144535	0.564841	-0.514836	0.405058	-0.777152	-1.45317	-0.0582649	0.156336	0.805942	-0.914551	-0.737076
ACTN4	K.AIM[+15.99492]TYVSSFYHAFSGAQK.A_3		0.602836	-0.134219	0.119946	-0.449807	0.108237	-0.286121	0.21077	0.676192	-0.405418	-0.27414	0.564841	-0.514836	0.405058	-0.777152	-1.45317	-0.0582649	0.156336	0.805942	-0.914551	-0.737076
ACTN4	K.AIMTYVSSFYHAFSGAQK.A_2		0.146037	0.896188	-0.763441	-0.564801	-0.902034	-0.657392	0.177632	0.750478	-0.801004	-0.601136	0.564841	-0.514836	0.405058	-0.777152	-1.45317	-0.0582649	0.156336	0.805942	-0.914551	-0.737076
ACTN4	K.AIMTYVSSFYHAFSGAQK.A_3		-1.41661	1.00732	0.638779	-1.27288	-0.311699	-0.377663	0.420873	0.375849	-0.730577	-0.274586	0.564841	-0.514836	0.405058	-0.777152	-1.45317	-0.0582649	0.156336	0.805942	-0.914551	-0.737076
ACTN4	K.ASIHEAWTDGK.E_2		0.600278	-1.90403	1.14407	-2.00102	-2.41386	-0.816992	0.183818	0.735612	-1.69073	-1.24372	0.564841	-0.514836	0.405058	-0.777152	-1.45317	-0.0582649	0.156336	0.805942	-0.914551	-0.737076
ACTN4	K.C[+57.02146]QLEINFNTLQTK.L_2		0.777908	-0.186208	-0.0992568	2.18953	1.50521	1.07311	0.0334326	1.47583	1.42513	2.10325	0.564841	-0.514836	0.405058	-0.777152	-1.45317	-0.0582649	0.156336	0.805942	-0.914551	-0.737076
ACTN4	K.DGLAFNALIHR.H_2		1.26028	-0.925167	-0.337784	-0.407057	-2.41331	-1.60721	0.167246	0.776645	-1.47497	-1.14553	0.564841	-0.514836	0.405058	-0.777152	-1.45317	-0.0582649	0.156336	0.805942	-0.914551	-0.737076
ACTN4	K.DHGGALGPEEFK.A_2		-0.316233	-0.0592115	1.03682	0.116069	0.0538883	-0.134303	0.64677	0.18925	-0.208575	-0.0394728	0.564841	-0.514836	0.405058	-0.777152	-1.45317	-0.0582649	0.156336	0.805942	-0.914551	-0.737076
ACTN4	K.EAMLK.H_1		0.922474	-0.441158	-0.110413	-0.646179	-0.616872	-0.36164	0.188826	0.723938	-0.665198	-0.481562	0.564841	-0.514836	0.405058	-0.777152	-1.45317	-0.0582649	0.156336	0.805942	-0.914551	-0.737076
ACTN4	K.EGLLLWC[+57.02146]QR.K_2		1.1366	-2.23505	0.572361	-0.76748	-2.75226	0.299552	0.548917	0.260493	-0.898034	-0.233932	0.564841	-0.514836	0.405058	-0.777152	-1.45317	-0.0582649	0.156336	0.805942	-0.914551	-0.737076
ACTN4	K.GISQEQM[+15.99492]QEFR.A_2		0.255809	0.773969	-0.611211	0.62527	0.603062	2.28336	0.208167	0.681587	1.03104	0.702745	0.564841	-0.514836	0.405058	-0.777152	-1.45317	-0.0582649	0.156336	0.805942	-0.914551	-0.737076
ACTN4	K.GISQEQMQEFR.A_2		-4.64821	-0.237995	1.99398	2.59611	6.09509	5.79426	0.0616746	1.20989	5.79256	7.00838	0.564841	-0.514836	0.405058	-0.777152	-1.45317	-0.0582649	0.156336	0.805942	-0.914551	-0.737076
ACTN4	K.GYEEWLLNEIR.R_2		-0.649509	-0.419425	1.45291	-0.173234	-1.08163	0.861224	0.780776	0.107473	-0.259204	-0.0278576	0.564841	-0.514836	0.405058	-0.777152	-1.45317	-0.0582649	0.156336	0.805942	-0.914551	-0.737076
ACTN4	K.HEAFESDLAAHQDR.V_2		0.0490904	0.42195	0.209737	-2.43334	-1.446	-0.178733	0.0753051	1.12318	-1.57962	-1.77419	0.564841	-0.514836	0.405058	-0.777152	-1.45317	-0.0582649	0.156336	0.805942	-0.914551	-0.737076
ACTN4	K.HEAFESDLAAHQDR.V_3		-0.224575	-0.42946	1.17901	-1.41713	-1.87131	-0.584459	0.0806759	1.09326	-1.46596	-1.60266	0.564841	-0.514836	0.405058	-0.777152	-1.45317	-0.0582649	0.156336	0.805942	-0.914551	-0.737076
ACTN4	K.HRDYETATLSDIK.A_2		0.0147728	1.01354	-0.690898	-1.23324	0.43235	-0.323388	0.519155	0.284703	-0.487232	-0.138716	0.564841	-0.514836	0.405058	-0.777152	-1.45317	-0.0582649	0.156336	0.805942	-0.914551	-0.737076
ACTN4	K.HRDYETATLSDIK.A_3		-0.23273	1.04855	-0.400537	-0.954261	0.875732	-0.283506	0.731362	0.135868	-0.259106	-0.0352041	0.564841	-0.514836	0.405058	-0.777152	-1.45317	-0.0582649	0.156336	0.805942	-0.914551	-0.737076
ACTN4	K.IC[+57.02146]DQWDALGSLTHSR.R_2		0.109191	0.966575	-0.92156	2.45441	2.53426	4.46447	0.0221885	1.65387	3.09965	5.12642	0.564841	-0.514836	0.405058	-0.777152	-1.45317	-0.0582649	0.156336	0.805942	-0.914551	-0.737076
ACTN4	K.IC[+57.02146]DQWDALGSLTHSR.R_3		1.14338	-3.94097	0.828191	-1.67697	-1.77582	0.073153	0.801617	0.0960331	-0.470078	-0.0451431	0.564841	-0.514836	0.405058	-0.777152	-1.45317	-0.0582649	0.156336	0.805942	-0.914551	-0.737076
ACTN4	K.LASDLLEWIR.R_2		-0.157285	-1.11627	1.48951	-1.06591	-2.24262	0.078668	0.320584	0.494058	-1.14861	-0.567478	0.564841	-0.514836	0.405058	-0.777152	-1.45317	-0.0582649	0.156336	0.805942	-0.914551	-0.737076
ACTN4	K.LM[+15.99492]LLLEVISGER.L_2		0.285949	-0.116485	0.496814	-1.91541	-3.08607	-2.40517	0.00218655	2.66024	-2.69098	-7.15864	0.564841	-0.514836	0.405058	-0.777152	-1.45317	-0.0582649	0.156336	0.805942	-0.914551	-0.737076
ACTN4	K.LMLLLEVISGER.L_2		-0.348368	0.714998	0.113276	-0.102602	0.567207	-0.0727607	0.941754	0.0260627	-0.0293538	-0.000765041	0.564841	-0.514836	0.405058	-0.777152	-1.45317	-0.0582649	0.156336	0.805942	-0.914551	-0.737076
ACTN4	K.LSGSN[+0.98402]PYTTVTPQIINSK.W_2		-1.46487	-1.19908	2.09631	-0.875855	-1.36384	-1.87983	0.372987	0.428307	-1.18396	-0.507099	0.564841	-0.514836	0.405058	-0.777152	-1.45317	-0.0582649	0.156336	0.805942	-0.914551	-0.737076
ACTN4	K.LSGSNPYTTVTPQIIN[+0.98402]SK.W_2		0.0738532	0.662	-0.128814	-0.395984	-0.482877	-0.285484	0.0727207	1.13834	-0.590461	-0.672147	0.564841	-0.514836	0.405058	-0.777152	-1.45317	-0.0582649	0.156336	0.805942	-0.914551	-0.737076
ACTN4	K.LSGSNPYTTVTPQIINSK.W_2		-0.320788	0.902371	-0.0102545	0.708503	0.381832	0.0353625	0.679406	0.167871	0.18479	0.0310207	0.564841	-0.514836	0.405058	-0.777152	-1.45317	-0.0582649	0.156336	0.805942	-0.914551	-0.737076
ACTN4	K.LVSIGAEEIVDGNAK.M_2		0.576303	0.181163	-0.200243	0.334843	-0.0565822	-0.305254	0.540657	0.267078	-0.194738	-0.0520103	0.564841	-0.514836	0.405058	-0.777152	-1.45317	-0.0582649	0.156336	0.805942	-0.914551	-0.737076
ACTN4	K.M[+15.99492]LDAEDIVN[+0.98402]TAR.P_2		-0.503276	-0.142438	1.20742	-0.923192	-1.16368	-0.908001	0.0877545	1.05673	-1.18553	-1.25278	0.564841	-0.514836	0.405058	-0.777152	-1.45317	-0.0582649	0.156336	0.805942	-0.914551	-0.737076
ACTN4	K.M[+15.99492]LDAEDIVNTARPDEK.A_2		0.603769	0.428536	-0.670935	-0.649445	-1.32779	0.135118	0.274948	0.56075	-0.734494	-0.411868	0.564841	-0.514836	0.405058	-0.777152	-1.45317	-0.0582649	0.156336	0.805942	-0.914551	-0.737076
ACTN4	K.M[+15.99492]LDAEDIVNTARPDEK.A_3		0.304529	-0.0263183	0.426655	-0.12404	-0.473595	0.00261979	0.0920589	1.03593	-0.433294	-0.448864	0.564841	-0.514836	0.405058	-0.777152	-1.45317	-0.0582649	0.156336	0.805942	-0.914551	-0.737076
ACTN4	K.M[+15.99492]VSDINN[+0.98402]GWQHLEQAEK.G_2		-0.221311	-0.367482	1.18013	2.4545	1.95177	2.16645	0.0178989	1.74717	1.99379	3.4835	0.564841	-0.514836	0.405058	-0.777152	-1.45317	-0.0582649	0.156336	0.805942	-0.914551	-0.737076
ACTN4	K.M[+15.99492]VSDINN[+0.98402]GWQHLEQAEK.G_3		-0.601409	-1.33891	1.83209	1.58051	1.28866	1.64481	0.185329	0.732056	1.54073	1.1279	0.564841	-0.514836	0.405058	-0.777152	-1.45317	-0.0582649	0.156336	0.805942	-0.914551	-0.737076
ACTN4	K.M[+15.99492]VSDINNGWQHLEQAEK.G_2		-4.77054	-0.765495	2.48588			7.71096	#DIV/0!	#DIV/0!	8.72768	#DIV/0!	0.564841	-0.514836	0.405058			-0.0582649	#DIV/0!	#DIV/0!	-0.209952	#DIV/0!
ACTN4	K.M[+15.99492]VSDINNGWQHLEQAEK.G_3		-0.203927	0.683004	0.146512	2.72204	-0.0461355	0.631467	0.363284	0.439754	0.893927	0.393108	0.564841	-0.514836	0.405058	-0.777152	-1.45317	-0.0582649	0.156336	0.805942	-0.914551	-0.737076
ACTN4	K.MLDAEDIVN[+0.98402]TARPDEK.A_2		-0.849309	-2.37649	2.20188	-2.34441	-1.65325	-2.37969	0.261623	0.582324	-1.78447	-1.03914	0.564841	-0.514836	0.405058	-0.777152	-1.45317	-0.0582649	0.156336	0.805942	-0.914551	-0.737076
ACTN4	K.MLDAEDIVNTARPDEK.A_2		1.89167	-1.99122	-1.67224	-4.85966	-3.06288	-2.7262	0.103778	0.983894	-2.95898	-2.91133	0.564841	-0.514836	0.405058	-0.777152	-1.45317	-0.0582649	0.156336	0.805942	-0.914551	-0.737076
ACTN4	K.MLDAEDIVNTARPDEK.A_3		-0.855628	1.32599	-0.267147	-0.1628	-0.157047	0.707347	0.935476	0.0289673	0.0614276	0.00177939	0.564841	-0.514836	0.405058	-0.777152	-1.45317	-0.0582649	0.156336	0.805942	-0.914551	-0.737076
ACTN4	K.NFITAEELR.R_2		1.22854	-0.253529	-1.09702	-0.587711	-0.794544	-1.39414	0.287302	0.541662	-0.884794	-0.479259	0.564841	-0.514836	0.405058	-0.777152	-1.45317	-0.0582649	0.156336	0.805942	-0.914551	-0.737076
ACTN4	K.NVNVQNFHISWK.D_2		-0.33955	0.129762	0.851501	0.984453	0.738859	0.632202	0.189441	0.722525	0.571267	0.412755	0.564841	-0.514836	0.405058	-0.777152	-1.45317	-0.0582649	0.156336	0.805942	-0.914551	-0.737076
ACTN4	K.PNLDLLEQQHQLIQEALIFDN[+0.98402]K.H_3		0.954014	0.269923	-1.36946	-1.07711	0.183223	-0.10224	0.737149	0.132445	-0.283535	-0.0375526	0.564841	-0.514836	0.405058	-0.777152	-1.45317	-0.0582649	0.156336	0.805942	-0.914551	-0.737076
ACTN4	K.QLEAIDQLHLEYAK.R_2		0.774064	-0.257192	-0.00910973	-0.491538	-0.835773	-0.327874	0.104807	0.97961	-0.720982	-0.706281	0.564841	-0.514836	0.405058	-0.777152	-1.45317	-0.0582649	0.156336	0.805942	-0.914551	-0.737076
ACTN4	K.QLEAIDQLHLEYAK.R_3		1.1934	-0.631902	-0.484067	-1.47237	-1.35604	-0.888822	0.107582	0.96826	-1.26489	-1.22474	0.564841	-0.514836	0.405058	-0.777152	-1.45317	-0.0582649	0.156336	0.805942	-0.914551	-0.737076
ACTN4	K.SFSTALYGESDL.-_2		0.461774	0.0438608	0.10744	1.41873	0.713119	-0.299992	0.474688	0.323592	0.406261	0.131463	0.564841	-0.514836	0.405058	-0.777152	-1.45317	-0.0582649	0.156336	0.805942	-0.914551	-0.737076
ACTN4	K.TFTAWC[+57.02146]N[+0.98402]SHLR.K_2		-2.91791	1.83463	-0.303935	1.62368	0.407501	0.0585878	0.469967	0.327932	1.159	0.380072	0.564841	-0.514836	0.405058	-0.777152	-1.45317	-0.0582649	0.156336	0.805942	-0.914551	-0.737076
ACTN4	K.TFTAWC[+57.02146]NSHLR.K_2		1.98299	-6.05084	-1.22001	-1.52321	-2.19529	-1.96748	0.957554	0.0188366	-0.132706	-0.00249973	0.564841	-0.514836	0.405058	-0.777152	-1.45317	-0.0582649	0.156336	0.805942	-0.914551	-0.737076
ACTN4	K.VLAGDKN[+0.98402]FITAEELR.R_2		1.73314	-0.955652	-2.67752	-0.769734	-2.5353	2.05965	0.911987	0.0400114	0.218219	0.00873124	0.564841	-0.514836	0.405058	-0.777152	-1.45317	-0.0582649	0.156336	0.805942	-0.914551	-0.737076
ACTN4	K.VLAGDKNFITAEELR.R_2		-0.0210851	0.00896496	0.71175	-0.0962044	-0.239938	0.700526	0.782217	0.106673	-0.111749	-0.0119205	0.564841	-0.514836	0.405058	-0.777152	-1.45317	-0.0582649	0.156336	0.805942	-0.914551	-0.737076
ACTN4	K.VLAGDKNFITAEELR.R_3		0.964218	-0.459007	-0.165012	0.564704	0.0823482	0.382826	0.640672	0.193364	0.229893	0.0444531	0.564841	-0.514836	0.405058	-0.777152	-1.45317	-0.0582649	0.156336	0.805942	-0.914551	-0.737076
ACTN4	K.VLAVNQENEHLM[+15.99492]EDYEK.L_2		-1.61592	-0.453034	1.85356	-1.01379	-2.12207	0.518308	0.56404	0.24869	-0.800721	-0.199131	0.564841	-0.514836	0.405058	-0.777152	-1.45317	-0.0582649	0.156336	0.805942	-0.914551	-0.737076
ACTN4	K.VLAVNQENEHLM[+15.99492]EDYEK.L_3		-1.30115	0.503063	1.0997	-2.24822	-3.14882	-0.246587	0.151796	0.818741	-1.98175	-1.62254	0.564841	-0.514836	0.405058	-0.777152	-1.45317	-0.0582649	0.156336	0.805942	-0.914551	-0.737076
ACTN4	K.VLAVNQENEHLMEDYEK.L_2			4.26303	3.41242	-4.85994	1.99755	0.326528	0.179367	0.746256	-4.68301	-3.49473		-0.514836	0.405058	-0.777152	-1.45317	-0.0582649	0.338212	0.470811	-0.707975	-0.333322
ACTN4	R.AAPFNNWMESAMEDLQDMFIVHTIEEIEGLISAHDQFK.S_4		0.0966572	0.154867	0.312017	2.19394	2.48884	2.56906	6.9763e-05	4.15637	2.22943	9.26636	0.564841	-0.514836	0.405058	-0.777152	-1.45317	-0.0582649	0.156336	0.805942	-0.914551	-0.737076
ACTN4	R.ASFN[+0.98402]HFDKDHGGALGPEEFK.A_2		0.987305	-2.68201	0.963681	2.16337	3.62078	3.58204	0.0620374	1.20735	3.36574	4.06361	0.564841	-0.514836	0.405058	-0.777152	-1.45317	-0.0582649	0.156336	0.805942	-0.914551	-0.737076
ACTN4	R.ASFN[+0.98402]HFDKDHGGALGPEEFK.A_3		0.385155	-1.57885	1.25573	0.0102856	-0.865853	0.471406	0.88012	0.0554582	-0.14873	-0.00824831	0.564841	-0.514836	0.405058	-0.777152	-1.45317	-0.0582649	0.156336	0.805942	-0.914551	-0.737076
ACTN4	R.ASFNHFDKDHGGALGPEEFK.A_2		0.617163	-9.12542	0.413622	-2.71287	-3.39455	-1.23035	0.94233	0.0257968	0.25229	0.00650827	0.564841	-0.514836	0.405058	-0.777152	-1.45317	-0.0582649	0.156336	0.805942	-0.914551	-0.737076
ACTN4	R.ASFNHFDKDHGGALGPEEFK.A_3		0.504074	-1.06498	0.92358	-1.10981	-1.48691	-0.274227	0.200144	0.698658	-1.07787	-0.753065	0.564841	-0.514836	0.405058	-0.777152	-1.45317	-0.0582649	0.156336	0.805942	-0.914551	-0.737076
ACTN4	R.ASFNHFDKDHGGALGPEEFK.A_4		0.976572	0.575102	-2.64558	-0.838035	-0.65638	-1.40913	0.632939	0.198638	-0.603213	-0.119821	0.564841	-0.514836	0.405058	-0.777152	-1.45317	-0.0582649	0.156336	0.805942	-0.914551	-0.737076
ACTN4	R.DAKGIS[+365.13220]QEQM[+15.99492]QEFR.A_3	TRUE	1.80251	-2.23913	-1.00386	-0.783104	-1.34408	-0.602198	0.741772	0.12973	-0.42963	-0.0557358	0.564841	-0.514836	0.405058	-0.777152	-1.45317	-0.0582649	0.156336	0.805942	-0.914551	-0.737076
ACTN4	R.DYETATLSDIK.A_2		-0.0559235	1.02526	-0.602201	10.4113	10.1548	4.2701	0.0167371	1.77632	8.15635	14.4883	0.564841	-0.514836	0.405058	-0.777152	-1.45317	-0.0582649	0.156336	0.805942	-0.914551	-0.737076
ACTN4	R.ELPPDQAEYC[+57.02146]IAR.M_2		0.532571	-0.726452	0.706373	1.02116	1.25722	0.813551	0.140866	0.851193	0.859815	0.731869	0.564841	-0.514836	0.405058	-0.777152	-1.45317	-0.0582649	0.156336	0.805942	-0.914551	-0.737076
ACTN4	R.ETTDTDTADQVIASFK.V_2		-0.331218	-0.207981	1.12702	-0.134818	-0.943101	0.242761	0.461805	0.335541	-0.474326	-0.159156	0.564841	-0.514836	0.405058	-0.777152	-1.45317	-0.0582649	0.156336	0.805942	-0.914551	-0.737076
ACTN4	R.FAIQDISVEETSAK.E_2		0.14753	0.28931	0.265833	-0.722722	-0.0525176	0.338653	0.291761	0.534972	-0.379753	-0.203157	0.564841	-0.514836	0.405058	-0.777152	-1.45317	-0.0582649	0.156336	0.805942	-0.914551	-0.737076
ACTN4	R.HRPELIEYDK.L_2		0.552936	0.0014614	0.0274857	-2.36098	-1.10159	-0.983629	0.0244228	1.6122	-1.67603	-2.7021	0.564841	-0.514836	0.405058	-0.777152	-1.45317	-0.0582649	0.156336	0.805942	-0.914551	-0.737076
ACTN4	R.IMSLVDPN[+0.98402]HSGLVTFQAFIDFMSR.E_3		-0.91576	0.561585	1.02027	1.56386	1.33071	3.18349	0.0940456	1.02666	1.80399	1.85209	0.564841	-0.514836	0.405058	-0.777152	-1.45317	-0.0582649	0.156336	0.805942	-0.914551	-0.737076
ACTN4	R.IMSLVDPNHSGLVTFQAFIDFMSR.E_2		1.06187	-0.478585	-7.36156	-0.929825	-4.85549	-3.80765	0.757954	0.120357	-0.938227	-0.112922	0.564841	-0.514836	0.405058	-0.777152	-1.45317	-0.0582649	0.156336	0.805942	-0.914551	-0.737076
ACTN4	R.IMSLVDPNHSGLVTFQAFIDFMSR.E_3		-2.2983	1.25092	1.32286	1.67601	1.10664	1.41017	0.340012	0.468505	1.30578	0.611764	0.564841	-0.514836	0.405058	-0.777152	-1.45317	-0.0582649	0.156336	0.805942	-0.914551	-0.737076
ACTN4	R.ISIEM[+15.99492]N[+0.98402]GTLEDQLSHLK.Q_2		-0.537435	-0.72089	1.58734	1.77351	1.77547	1.64369	0.094227	1.02582	1.62122	1.66309	0.564841	-0.514836	0.405058	-0.777152	-1.45317	-0.0582649	0.156336	0.805942	-0.914551	-0.737076
ACTN4	R.ISIEM[+15.99492]N[+0.98402]GTLEDQLSHLK.Q_3		0.398296	-0.428027	0.680007	0.162057	0.170525	0.206005	0.916308	0.0379587	-0.0372298	-0.00141319	0.564841	-0.514836	0.405058	-0.777152	-1.45317	-0.0582649	0.156336	0.805942	-0.914551	-0.737076
ACTN4	R.ISIEM[+15.99492]NGTLEDQLSHLK.Q_2		-0.742649	1.19868	-0.153543	-0.231231	0.288973	0.123018	0.948886	0.0227862	-0.0405758	-0.000924566	0.564841	-0.514836	0.405058	-0.777152	-1.45317	-0.0582649	0.156336	0.805942	-0.914551	-0.737076
ACTN4	R.ISIEM[+15.99492]NGTLEDQLSHLK.Q_3		1.39063	-1.34353	-0.317822	0.561657	0.104891	-0.47039	0.863871	0.063551	0.155627	0.00989025	0.564841	-0.514836	0.405058	-0.777152	-1.45317	-0.0582649	0.156336	0.805942	-0.914551	-0.737076
ACTN4	R.ISIEMN[+0.98402]GTLEDQLSHLK.Q_2		-1.79192	2.17165	-2.84174		0.593433	-1.87582	0.939434	0.0271339	0.179475	0.00486985	0.564841	-0.514836	0.405058		-1.45317	-0.0582649	0.272843	0.564088	-0.907407	-0.511857
ACTN4	R.ISIEMN[+0.98402]GTLEDQLSHLK.Q_3		-0.866154	1.64089	-1.21551	0.0215336	0.519388	-0.0799352	0.759869	0.119261	0.300587	0.0358483	0.564841	-0.514836	0.405058	-0.777152	-1.45317	-0.0582649	0.156336	0.805942	-0.914551	-0.737076
ACTN4	R.ISIEMN[+0.98402]GTLEDQLSHLKQYER.S_3		0.147241	-0.398977	0.93676	-0.0738935	0.630903	-0.698551	0.640181	0.193697	-0.275522	-0.0533678	0.564841	-0.514836	0.405058	-0.777152	-1.45317	-0.0582649	0.156336	0.805942	-0.914551	-0.737076
ACTN4	R.KAGTQIENIDEDFR.D_2		0.690744	-0.54515	0.34572	-1.19445	-0.929972	-0.49009	0.0700304	1.15471	-1.03528	-1.19545	0.564841	-0.514836	0.405058	-0.777152	-1.45317	-0.0582649	0.156336	0.805942	-0.914551	-0.737076
ACTN4	R.KAGTQIENIDEDFR.D_3		1.12962	-0.366532	-0.664874	0.458955	-1.72664	-1.10478	0.389948	0.408994	-0.823559	-0.33683	0.564841	-0.514836	0.405058	-0.777152	-1.45317	-0.0582649	0.156336	0.805942	-0.914551	-0.737076
ACTN4	R.KAGTQIENIDEDFRDGLK.L_2		-1.01246	-5.46384	2.39087	-1.41722	3.01421	4.22462	0.310778	0.507549	3.30235	1.6761	0.564841	-0.514836	0.405058	-0.777152	-1.45317	-0.0582649	0.156336	0.805942	-0.914551	-0.737076
ACTN4	R.KAGTQIENIDEDFRDGLK.L_3		0.690164	-0.787693	0.539157	-0.559607	-1.38205	-0.889141	0.107154	0.969991	-1.09081	-1.05808	0.564841	-0.514836	0.405058	-0.777152	-1.45317	-0.0582649	0.156336	0.805942	-0.914551	-0.737076
ACTN4	R.KAGTQIENIDEDFRDGLK.L_4		1.52692	-2.04816	-0.180854	0.59148	-1.48578	-2.62366	0.538483	0.268828	-0.938622	-0.252328	0.564841	-0.514836	0.405058	-0.777152	-1.45317	-0.0582649	0.156336	0.805942	-0.914551	-0.737076
ACTN4	R.KDDPVTNLN[+0.98402]NAFEVAEK.Y_2		-0.0806688	0.254138	0.527871	-1.61666	-1.01608	-0.971884	0.00621643	2.20646	-1.43532	-3.16698	0.564841	-0.514836	0.405058	-0.777152	-1.45317	-0.0582649	0.156336	0.805942	-0.914551	-0.737076
ACTN4	R.KDDPVTNLNNAFEVAEK.Y_2		0.436085	0.166136	0.0761398	7.90129	7.36916	3.35648	0.0141579	1.849	5.98286	11.0623	0.564841	-0.514836	0.405058	-0.777152	-1.45317	-0.0582649	0.156336	0.805942	-0.914551	-0.737076
ACTN4	R.KDDPVTNLNNAFEVAEK.Y_3		0.548942	-0.88823	0.789715	0.214853	-0.501759	0.199961	0.770852	0.113029	-0.179124	-0.0202462	0.564841	-0.514836	0.405058	-0.777152	-1.45317	-0.0582649	0.156336	0.805942	-0.914551	-0.737076
ACTN4	R.KHEAFESDLAAHQDR.V_2		0.582254	0.433342	-7.98064	-8.75785	-5.76671	-10.1115	0.130896	0.883073	-5.89033	-5.20159	0.564841	-0.514836	0.405058	-0.777152	-1.45317	-0.0582649	0.156336	0.805942	-0.914551	-0.737076
ACTN4	R.KHEAFESDLAAHQDR.V_3		-2.78908	0.718496	1.29529	-2.76307	-2.30236	-1.97183	0.182744	0.738157	-2.08732	-1.54077	0.564841	-0.514836	0.405058	-0.777152	-1.45317	-0.0582649	0.156336	0.805942	-0.914551	-0.737076
ACTN4	R.KTFTAWC[+57.02146]NSHLR.K_3		-0.500187	1.36319	-0.767117	0.599705	1.70272	-1.11891	0.749484	0.125238	0.362541	0.0454039	0.564841	-0.514836	0.405058	-0.777152	-1.45317	-0.0582649	0.156336	0.805942	-0.914551	-0.737076
ACTN4	R.LSNRPAFM[+15.99492]PSEGK.M_2		0.562891	-0.078016	0.117931	-1.23107	-0.106575	-0.417936	0.110788	0.955508	-0.786129	-0.751152	0.564841	-0.514836	0.405058	-0.777152	-1.45317	-0.0582649	0.156336	0.805942	-0.914551	-0.737076
ACTN4	R.M[+15.99492]APYQGPDAVPGALDYK.S_2		-0.383449	1.45223	-1.21189	-3.12536	-3.32971	-2.12512	0.0319784	1.49514	-2.81236	-4.20488	0.564841	-0.514836	0.405058	-0.777152	-1.45317	-0.0582649	0.156336	0.805942	-0.914551	-0.737076
ACTN4	R.MAPYQGPDAVPGALDYK.S_2		-0.368338	0.309743	0.739048	-1.23246	-2.29071	0.548086	0.242275	0.615692	-1.21851	-0.750229	0.564841	-0.514836	0.405058	-0.777152	-1.45317	-0.0582649	0.156336	0.805942	-0.914551	-0.737076
ACTN4	R.QFASQANVVGPWIQTK.M_2		0.284264	-0.000524981	0.413123	0.388975	-0.0970484	0.475768	0.918264	0.0370322	0.0236106	0.000874354	0.564841	-0.514836	0.405058	-0.777152	-1.45317	-0.0582649	0.156336	0.805942	-0.914551	-0.737076
ACTN4	R.SIVDYKPN[+0.98402]LDLLEQQHQLIQEALIFDNK.H_3		-0.0660336	0.722431	-9.09105	-1.14098	-3.29823	-5.39887	0.896591	0.0474054	-0.467811	-0.0221768	0.564841	-0.514836	0.405058	-0.777152	-1.45317	-0.0582649	0.156336	0.805942	-0.914551	-0.737076
ACTN4	R.SIVDYKPN[+0.98402]LDLLEQQHQLIQEALIFDNK.H_4		1.28508	0.0648869	-4.80909	-1.72291	-1.96452	-5.46436	0.440808	0.355751	-1.89756	-0.675056	0.564841	-0.514836	0.405058	-0.777152	-1.45317	-0.0582649	0.156336	0.805942	-0.914551	-0.737076
ACTN4	R.SIVDYKPNLDLLEQQHQLIQEALIFDNK.H_3		0.707491	0.17398	-6.35355	1.13145	-0.676476	0.643155	0.401077	0.396772	2.19007	0.868958	0.564841	-0.514836	0.405058	-0.777152	-1.45317	-0.0582649	0.156336	0.805942	-0.914551	-0.737076
ACTN4	R.SIVDYKPNLDLLEQQHQLIQEALIFDNK.H_4		1.74737	-1.01499	-5.53763	-0.478102	-0.88779	-2.42422	0.885437	0.0528425	0.338381	0.0178809	0.564841	-0.514836	0.405058	-0.777152	-1.45317	-0.0582649	0.156336	0.805942	-0.914551	-0.737076
ACTN4	R.TIN[+0.98402]EVENQILTR.D_2		0.794192	-0.760771	0.385553	-1.22716	-1.52554	-0.23214	0.135371	0.868476	-1.1346	-0.985376	0.564841	-0.514836	0.405058	-0.777152	-1.45317	-0.0582649	0.156336	0.805942	-0.914551	-0.737076
ACTN4	R.TINEVENQILTR.D_2		0.625011	-0.473024	0.378995	-1.22758	-1.26837	0.34195	0.22593	0.646027	-0.894996	-0.578191	0.564841	-0.514836	0.405058	-0.777152	-1.45317	-0.0582649	0.156336	0.805942	-0.914551	-0.737076
ACTN4	R.TIPWLEDR.V_2		0.429168	-1.22994	1.09481	-0.0691097	-0.737586	0.769884	0.899179	0.0461538	-0.110283	-0.00509	0.564841	-0.514836	0.405058	-0.777152	-1.45317	-0.0582649	0.156336	0.805942	-0.914551	-0.737076
ACTN4	R.VEQIAAIAQELN[+0.98402]ELDYYDSHNVNTR.C_3		0.231733	0.549338	-0.171342	-0.592941	-0.938928	-0.723807	0.0145726	1.83646	-0.955135	-1.75407	0.564841	-0.514836	0.405058	-0.777152	-1.45317	-0.0582649	0.156336	0.805942	-0.914551	-0.737076
ACTN4	R.VEQIAAIAQELNELDYYDSHNVN[+0.98402]TR.C_3		0.292831	0.511415	-0.224735	-1.49319	-2.35041	-1.25406	0.0089412	2.0486	-1.89239	-3.87676	0.564841	-0.514836	0.405058	-0.777152	-1.45317	-0.0582649	0.156336	0.805942	-0.914551	-0.737076
ACTN4	R.VEQIAAIAQELNELDYYDSHNVNTR.C_2		0.250677	-0.371225	0.808068	-1.03681	-1.06761	-1.07572	0.0193884	1.71246	-1.28922	-2.20773	0.564841	-0.514836	0.405058	-0.777152	-1.45317	-0.0582649	0.156336	0.805942	-0.914551	-0.737076
ACTN4	R.VEQIAAIAQELNELDYYDSHNVNTR.C_3		0.531514	0.391957	-0.465167	-1.32468	-1.9974	-1.53901	0.00864743	2.06311	-1.77313	-3.65817	0.564841	-0.514836	0.405058	-0.777152	-1.45317	-0.0582649	0.156336	0.805942	-0.914551	-0.737076
ACTN4	R.VEQIAAIAQELNELDYYDSHNVNTR.C_4		0.0729595	0.333553	0.273729	0.323039	0.336802	-0.0127252	0.940424	0.0266765	-0.0110419	-0.00029456	0.564841	-0.514836	0.405058	-0.777152	-1.45317	-0.0582649	0.156336	0.805942	-0.914551	-0.737076
ACTN4	R.VGWEQLLTTIAR.T_2		-0.184247	1.07275	-0.514616	-3.00027	-6.35868	-4.34873	0.0125431	1.90159	-4.69386	-8.92582	0.564841	-0.514836	0.405058	-0.777152	-1.45317	-0.0582649	0.156336	0.805942	-0.914551	-0.737076
ACTR1A	K.AGFAGDQIPK.Y_2		1.10316	-2.51041	0.741316	0.343339	-0.928364	-0.189683	0.977469	0.00989704	-0.0362573	-0.00035884	0.250931	0.356539	0.0375221	-1.22185	0.50075	0.526289	0.657827	0.181888	-0.279935	-0.0509168
ACTR1A	K.AQYYLPDGSTIEIGPSR.F_2		0.276897	0.461474	-0.0934891	-1.84906	-1.60254	-1.61456	0.000470443	3.32749	-1.90368	-6.33448	0.250931	0.356539	0.0375221	-1.22185	0.50075	0.526289	0.657827	0.181888	-0.279935	-0.0509168
ACTR1A	K.DQLQTFSEEHPVLLTEAPLN[+0.98402]PR.K_2		-0.506739	0.59788	0.482514	-0.551747	0.359108	2.57431	0.576382	0.23929	0.60267	0.144213	0.250931	0.356539	0.0375221	-1.22185	0.50075	0.526289	0.657827	0.181888	-0.279935	-0.0509168
ACTR1A	K.DQLQTFSEEHPVLLTEAPLNPR.K_2		-1.67147	-2.26857	2.82311	-3.88418	-3.29444	-2.53335	0.158254	0.800646	-2.86501	-2.29386	0.250931	0.356539	0.0375221	-1.22185	0.50075	0.526289	0.657827	0.181888	-0.279935	-0.0509168
ACTR1A	K.DQLQTFSEEHPVLLTEAPLNPR.K_3		0.602917	0.474742	-0.756869	-0.094445	0.256669	-0.829212	0.574126	0.240993	-0.329259	-0.0793491	0.250931	0.356539	0.0375221	-1.22185	0.50075	0.526289	0.657827	0.181888	-0.279935	-0.0509168
ACTR1A	K.YC[+57.02146]FPNYVGR.P_2		0.424295	0.49808	-0.462064	1.83679	0.88531	1.03321	0.0619362	1.20806	1.09833	1.32685	0.250931	0.356539	0.0375221	-1.22185	0.50075	0.526289	0.657827	0.181888	-0.279935	-0.0509168
ACTR1A	M.ES[+203.07937]YDVIANQPVVIDN[+0.98402]GSGVIK.A_2	TRUE			5.12378			1.91435	#DIV/0!	#DIV/0!	-3.20944	#DIV/0!			0.0375221			0.526289	#DIV/0!	#DIV/0!	0.488767	#DIV/0!
ACTR1A	R.AC[+57.02146]YLSINPQKDETLETEK.A_2		-2.13129	2.25483	-2.39575	-3.81211		0.826053	0.795893	0.0991452	-0.735626	-0.0729338	0.250931	0.356539	0.0375221	-1.22185		0.526289	0.458127	0.339014	-0.562779	-0.19079
ACTR1A	R.AC[+57.02146]YLSINPQKDETLETEK.A_3		0.411312	0.41196	-0.237777	-3.20462	-1.98148	-1.49249	0.0119083	1.92415	-2.42136	-4.65906	0.250931	0.356539	0.0375221	-1.22185	0.50075	0.526289	0.657827	0.181888	-0.279935	-0.0509168
ACTR1A	R.APELLFRPDLIGEESEGIHEVLVFAIQK.S_4		-1.35372	0.642841	1.82192	2.74836	3.09455	2.88763	0.0527445	1.27782	2.53983	3.24545	0.250931	0.356539	0.0375221	-1.22185	0.50075	0.526289	0.657827	0.181888	-0.279935	-0.0509168
ACTR1A	R.LYSTWIGGSILASLDTFK.K_2		-0.165853	0.665201	-0.241554	0.678894	1.4008	0.727463	0.0845731	1.07277	0.849788	0.911625	0.250931	0.356539	0.0375221	-1.22185	0.50075	0.526289	0.657827	0.181888	-0.279935	-0.0509168
ACTR1A	R.LYSTWIGGSILASLDTFKK.M_3		1.4395	-1.16951	-0.675997	0.0358617	0.934051	1.14356	0.388723	0.41036	0.839826	0.344631	0.250931	0.356539	0.0375221	-1.22185	0.50075	0.526289	0.657827	0.181888	-0.279935	-0.0509168
ACTR1A	R.TLFSNIVLSGGSTLFK.G_2		1.08916	-0.520567	-0.373964	-2.95705	-1.9229	-3.29876	0.0133577	1.87427	-2.79111	-5.2313	0.250931	0.356539	0.0375221	-1.22185	0.50075	0.526289	0.657827	0.181888	-0.279935	-0.0509168
ACTR1A	R.TLFSNIVLSGGSTLFK.G_3		-0.37485	0.497265	0.553597	0.957746	0.144577	0.578727	0.429399	0.367139	0.335013	0.122996	0.250931	0.356539	0.0375221	-1.22185	0.50075	0.526289	0.657827	0.181888	-0.279935	-0.0509168
ACTR1A	R.TTGVVLDSGDGVTHAVPIYEGFAM[+15.99492]PHSIM[+15.99492]R.I_3			5.26641		13.4749	13.6563	11.0477	#DIV/0!	#DIV/0!	7.45991	#DIV/0!		0.356539		-1.22185	0.50075	0.526289	#DIV/0!	#DIV/0!	-0.421476	#DIV/0!
ACTR1A	R.TTGVVLDSGDGVTHAVPIYEGFAM[+15.99492]PHSIM[+15.99492]R.I_4		0.340287	0.443723	-7.51686	7.87878	5.97055	4.22431	0.0436019	1.3605	8.26883	11.2497	0.250931	0.356539	0.0375221	-1.22185	0.50075	0.526289	0.657827	0.181888	-0.279935	-0.0509168
ACTR1A	R.VM[+15.99492]AGALEGDIFIGPK.A_2		0.599631	-0.0268499	0.0284856	0.621786	0.69717	0.0243008	0.445018	0.351623	0.24733	0.0869669	0.250931	0.356539	0.0375221	-1.22185	0.50075	0.526289	0.657827	0.181888	-0.279935	-0.0509168
ACTR2	K.DLM[+15.99492]VGDEASELR.S_2		-0.652553	0.336526	0.9402	-0.62211	-1.22034	-1.01699	0.0794268	1.10003	-1.16121	-1.27737	1.43544	-1.33536	0.0159629	0.593634	0.150673	-1.01024	0.897933	0.0467562	-0.127326	-0.00595328
ACTR2	K.HIVLSGGSTM[+15.99492]YPGLPSR.L_2		0.0493682	-0.0515788	0.685359	1.14521	1.31788	-0.0939174	0.32466	0.488572	0.562008	0.274581	1.43544	-1.33536	0.0159629	0.593634	0.150673	-1.01024	0.897933	0.0467562	-0.127326	-0.00595328
ACTR2	K.HIVLSGGSTM[+15.99492]YPGLPSR.L_3		0.0688952	0.0366138	0.647102	2.08053	1.50402	0.178439	0.168095	0.774446	1.00346	0.777126	1.43544	-1.33536	0.0159629	0.593634	0.150673	-1.01024	0.897933	0.0467562	-0.127326	-0.00595328
ACTR2	K.HLWDYTFGPEK.L_2		0.0948627	-2.22602	1.66657	2.04315	1.48067	2.34663	0.142475	0.84626	2.11168	1.78703	1.43544	-1.33536	0.0159629	0.593634	0.150673	-1.01024	0.897933	0.0467562	-0.127326	-0.00595328
ACTR2	K.ILLTEPPM[+15.99492]NPTK.N_2		0.236782	0.614217	-0.291539	-0.727674	-1.34121	-1.41792	0.0168452	1.77352	-1.34875	-2.39205	1.43544	-1.33536	0.0159629	0.593634	0.150673	-1.01024	0.897933	0.0467562	-0.127326	-0.00595328
ACTR2	K.LALETTVLVESYTLPDGR.I_2		0.457055	0.110688	0.0753555	-0.58074	-1.18631	-0.817987	0.00736224	2.13299	-1.07605	-2.29519	1.43544	-1.33536	0.0159629	0.593634	0.150673	-1.01024	0.897933	0.0467562	-0.127326	-0.00595328
ACTR2	K.VVVC[+57.02146]DN[+0.98402]GTGFVK.C_2		1.3658	-1.27995	-0.300469	-0.846392	-1.32693	-1.61307	0.212779	0.672071	-1.19059	-0.800162	1.43544	-1.33536	0.0159629	0.593634	0.150673	-1.01024	0.897933	0.0467562	-0.127326	-0.00595328
ACTR2	R.GYAFNHSADFETVR.M_2		0.905801	-0.910516	0.339499	1.42518	2.26741	0.556769	0.148061	0.82956	1.30486	1.08246	1.43544	-1.33536	0.0159629	0.593634	0.150673	-1.01024	0.897933	0.0467562	-0.127326	-0.00595328
ACTR2	R.GYAFNHSADFETVR.M_3		1.94266	-6.78834	-2.3711	1.45829	0.227927	-1.23037	0.387123	0.412151	2.55754	1.05409	1.43544	-1.33536	0.0159629	0.593634	0.150673	-1.01024	0.897933	0.0467562	-0.127326	-0.00595328
ACTR2	R.KVVVC[+57.02146]DN[+0.98402]GTGFVK.C_2		0.577966	0.146859	-0.136569	-0.786643	-0.810077	0.0968191	0.128138	0.892321	-0.696052	-0.621102	1.43544	-1.33536	0.0159629	0.593634	0.150673	-1.01024	0.897933	0.0467562	-0.127326	-0.00595328
ACTR2	R.SM[+15.99492]LEVNYPM[+15.99492]EN[+0.98402]GIVR.N_2		1.71433	-1.27667	-1.47692	-2.77497	-1.20801	-2.95081	0.168744	0.772772	-1.96484	-1.51837	1.43544	-1.33536	0.0159629	0.593634	0.150673	-1.01024	0.897933	0.0467562	-0.127326	-0.00595328
ACTR3	K.GVDDLDFFIGDEAIEKPTYATK.W_2		-3.05339	0.513077	1.68723	1.57605	-0.438806	0.17731	0.664368	0.177591	0.722547	0.128318	1.09163	-0.314201	-0.801555	-0.413847	-0.0256707	-0.168808	0.753429	0.122957	-0.194732	-0.0239438
ACTR3	K.GVDDLDFFIGDEAIEKPTYATK.W_3		0.260905	0.344607	0.0589931	-0.501988	-0.398134	-1.07002	0.0175886	1.75477	-0.878215	-1.54106	1.09163	-0.314201	-0.801555	-0.413847	-0.0256707	-0.168808	0.753429	0.122957	-0.194732	-0.0239438
ACTR3	K.KDYEEIGPSIC[+57.02146]R.H_2		1.13508	-0.299551	-0.761926	1.09732	0.317283	2.46642	0.209236	0.679364	1.26914	0.862208	1.09163	-0.314201	-0.801555	-0.413847	-0.0256707	-0.168808	0.753429	0.122957	-0.194732	-0.0239438
ACTR3	K.LGYAGNTEPQFIIPSC[+57.02146]IAIK.E_2		1.39302	-1.09095	-0.526433	-5.25849	-6.25799	-5.93562	0.00206506	2.68507	-5.74258	-15.4192	1.09163	-0.314201	-0.801555	-0.413847	-0.0256707	-0.168808	0.753429	0.122957	-0.194732	-0.0239438
ACTR3	K.NIVLSGGSTM[+15.99492]FR.D_2		0.280956	0.273679	0.0875652	1.4876	1.82265	0.00869701	0.186844	0.728521	0.892249	0.650022	1.09163	-0.314201	-0.801555	-0.413847	-0.0256707	-0.168808	0.753429	0.122957	-0.194732	-0.0239438
ACTR3	K.NIVLSGGSTMFR.D_2		-0.215202	0.433767	0.495335	-0.0888412	0.10054	0.702838	0.999517	0.00020989	0.000212324	4.45647e-08	1.09163	-0.314201	-0.801555	-0.413847	-0.0256707	-0.168808	0.753429	0.122957	-0.194732	-0.0239438
ACTR3	K.PIDVQVITHHM[+15.99492]QR.Y_3		-0.15282	0.244541	0.642085	1.69651	0.396273	-0.365621	0.634375	0.197654	0.331119	0.0654469	1.09163	-0.314201	-0.801555	-0.413847	-0.0256707	-0.168808	0.753429	0.122957	-0.194732	-0.0239438
ACTR3	K.PIDVQVITHHMQR.Y_3		0.540638	-0.34711	0.405673	0.0467217	-0.432165	0.0541826	0.386816	0.412496	-0.310154	-0.127937	1.09163	-0.314201	-0.801555	-0.413847	-0.0256707	-0.168808	0.753429	0.122957	-0.194732	-0.0239438
ACTR3	K.QYTGINAISK.K_2		0.866072	-1.04897	0.472188	0.820797	0.977416	1.35266	0.18991	0.721453	0.953861	0.688165	1.09163	-0.314201	-0.801555	-0.413847	-0.0256707	-0.168808	0.753429	0.122957	-0.194732	-0.0239438
ACTR3	K.VGDQAQR.R_1		0.629147	0.367448	-0.617755	-0.466394	-0.447167	-0.645252	0.168565	0.773233	-0.645884	-0.499419	1.09163	-0.314201	-0.801555	-0.413847	-0.0256707	-0.168808	0.753429	0.122957	-0.194732	-0.0239438
ACTR3	R.AEPEDHYFLLTEPPLN[+0.98402]TPENR.E_2		1.17287	0.0956211	-1.90752	0.0549568	1.44628	-1.54557	0.88165	0.0547038	0.198231	0.010844	1.09163	-0.314201	-0.801555	-0.413847	-0.0256707	-0.168808	0.753429	0.122957	-0.194732	-0.0239438
ACTR3	R.AEPEDHYFLLTEPPLN[+0.98402]TPENR.E_3		1.10132	-0.408766	-0.513454	-0.258699	-0.702195	-0.551763	0.353467	0.451651	-0.563921	-0.254696	1.09163	-0.314201	-0.801555	-0.413847	-0.0256707	-0.168808	0.753429	0.122957	-0.194732	-0.0239438
ACTR3	R.AEPEDHYFLLTEPPLNTPENR.E_2		1.18345	-0.411031	-0.858949	-1.78832	1.87304	5.00485	0.449105	0.347652	1.72537	0.599828	1.09163	-0.314201	-0.801555	-0.413847	-0.0256707	-0.168808	0.753429	0.122957	-0.194732	-0.0239438
ACTR3	R.AEPEDHYFLLTEPPLNTPENR.E_3		-0.877026	1.7145	-1.32256	-1.34414	-0.790001	-2.87754	0.25418	0.594859	-1.50886	-0.89756	1.09163	-0.314201	-0.801555	-0.413847	-0.0256707	-0.168808	0.753429	0.122957	-0.194732	-0.0239438
ACTR3	R.DITYFIQQLLR.D_2		-0.0770326	0.981696	-0.664662	1.11331	-0.055034	0.642519	0.455044	0.341947	0.486933	0.166505	1.09163	-0.314201	-0.801555	-0.413847	-0.0256707	-0.168808	0.753429	0.122957	-0.194732	-0.0239438
ACTR3	R.DREVGIPPEQSLETAK.A_2		0.451753	-0.0302147	0.243996	0.0327877	-0.712827	-0.0670777	0.158684	0.799468	-0.470884	-0.376456	1.09163	-0.314201	-0.801555	-0.413847	-0.0256707	-0.168808	0.753429	0.122957	-0.194732	-0.0239438
ACTR3	R.EVGIPPEQSLET[+947.32303]AKAVKERYSYVC[+57.02146]PDLVK.E_4	TRUE	0.67807	-0.522626	0.381098	0.444479	0.0801728	0.926642	0.523241	0.281298	0.304918	0.0857728	1.09163	-0.314201	-0.801555	-0.413847	-0.0256707	-0.168808	0.753429	0.122957	-0.194732	-0.0239438
ACTR3	R.EVGIPPEQSLETAK.A_2		0.329471	-0.246645	0.59846	4.60943	3.81786	1.4829	0.0339203	1.46954	3.0763	4.52075	1.09163	-0.314201	-0.801555	-0.413847	-0.0256707	-0.168808	0.753429	0.122957	-0.194732	-0.0239438
ACTR3	R.FM[+15.99492]EQVIFK.Y_2		0.402625	0.0931687	0.2024	0.913486	0.586536	0.297786	0.140193	0.853275	0.366538	0.312758	1.09163	-0.314201	-0.801555	-0.413847	-0.0256707	-0.168808	0.753429	0.122957	-0.194732	-0.0239438
ACTR3	R.HNPVFGVM[+15.99492]S.-_1		-0.454016	-0.139872	1.16016	-1.50397	-0.995291	-0.220398	0.151626	0.819226	-1.09531	-0.897306	1.09163	-0.314201	-0.801555	-0.413847	-0.0256707	-0.168808	0.753429	0.122957	-0.194732	-0.0239438
ACTR3	R.HNPVFGVM[+15.99492]S.-_2		0.0677414	-1.78601	1.56009	-1.93658	-2.32474	0.149738	0.346324	0.460518	-1.3178	-0.606871	1.09163	-0.314201	-0.801555	-0.413847	-0.0256707	-0.168808	0.753429	0.122957	-0.194732	-0.0239438
ACTR3	R.HNPVFGVMS.-_1		1.96257	-1.39188	-4.06311	0.319866	1.60804	-0.465679	0.421308	0.3754	1.65155	0.619993	1.09163	-0.314201	-0.801555	-0.413847	-0.0256707	-0.168808	0.753429	0.122957	-0.194732	-0.0239438
ACTR3	R.LKPKPIDVQVITHHM[+15.99492]QR.Y_2			3.80784			8.621	19.9899	#DIV/0!	#DIV/0!	10.4976	#DIV/0!		-0.314201			-0.0256707	-0.168808	#DIV/0!	#DIV/0!	0.216961	#DIV/0!
ACTR3	R.LKPKPIDVQVITHHM[+15.99492]QR.Y_3		0.722202	-0.342612	-8.91032	-3.82594	-4.07249	-10.1922	0.436761	0.359756	-3.18662	-1.14641	1.09163	-0.314201	-0.801555	-0.413847	-0.0256707	-0.168808	0.753429	0.122957	-0.194732	-0.0239438
ACTR3	R.LKPKPIDVQVITHHM[+15.99492]QR.Y_4		0.931049	0.516127	-2.15511	-0.0619154	1.12196	0.365783	0.526728	0.278414	0.711255	0.198023	1.09163	-0.314201	-0.801555	-0.413847	-0.0256707	-0.168808	0.753429	0.122957	-0.194732	-0.0239438
ACTR3	R.LPAC[+57.02146]VVDC[+57.02146]GTGYTK.L_2		0.510442	0.134015	-0.0343759	-3.8298	-0.7519	-2.75709	0.0444842	1.35179	-2.64962	-3.58174	1.09163	-0.314201	-0.801555	-0.413847	-0.0256707	-0.168808	0.753429	0.122957	-0.194732	-0.0239438
ACTR3	R.TLTGTVIDSGDGVTHVIPVAEGYVIGSC[+57.02146]IK.H_3		1.38923	-0.767985	-0.940476	-6.4341	-3.22131	-2.10523	0.0636338	1.19631	-3.8138	-4.5625	1.09163	-0.314201	-0.801555	-0.413847	-0.0256707	-0.168808	0.753429	0.122957	-0.194732	-0.0239438
ACTR3	R.YAVWFGGSM[+15.99492]LASTPEFYQVC[+57.02146]HTK.K_3		-0.207476	0.146747	0.775643	-0.970107	-0.171741	0.864091	0.612823	0.212665	-0.330891	-0.0703687	1.09163	-0.314201	-0.801555	-0.413847	-0.0256707	-0.168808	0.753429	0.122957	-0.194732	-0.0239438
ADAM10	R.EAVIAQISSHVK.A_2		1.2508	-0.800343	-0.446035	-0.746808	-1.33977	0.139266	0.443041	0.353556	-0.65058	-0.230017	1.10946	-0.844663	-0.453626	-0.385214	-0.94788	0.434477	0.758727	0.119914	-0.236595	-0.028371
ADAR	K.GETVNDC[+57.02146]HAEIISR.R_2		0.890576	-1.67561	0.749652	-1.00566	0.0203755	1.3875	0.899423	0.0460362	0.145865	0.00671506	0.945396	-1.43966	0.279412	0.281502	-0.327692	0.0283189	0.932854	0.0301862	0.0656587	0.00198198
ADAR	K.KDSEDMGVVVSLGTGN[+0.98402]R.C_3		0.0949798	0.393322	-0.0812113	-1.41841	-1.12751	-1.42041	0.000998761	3.00054	-1.45781	-4.37421	0.945396	-1.43966	0.279412	0.281502	-0.327692	0.0283189	0.932854	0.0301862	0.0656587	0.00198198
ADAR	K.SVTLGYLFSQGHLTR.A_2		0.551812	-0.325124	0.396968	1.10369	-0.310124	-0.331557	0.926186	0.033302	-0.0538836	-0.00179443	0.945396	-1.43966	0.279412	0.281502	-0.327692	0.0283189	0.932854	0.0301862	0.0656587	0.00198198
ADAR	K.TAESQTPTPSATSFFSGK.S_2		1.08288	-3.13087	0.827125	-0.695933	-3.01802	-0.803837	0.519941	0.284046	-1.09897	-0.312158	0.945396	-1.43966	0.279412	0.281502	-0.327692	0.0283189	0.932854	0.0301862	0.0656587	0.00198198
ADAR	R.HYPVFENPK.Q_2		1.01289	-0.829167	0.0734664	0.926936	0.789907	1.74248	0.154672	0.810588	1.06738	0.865205	0.945396	-1.43966	0.279412	0.281502	-0.327692	0.0283189	0.932854	0.0301862	0.0656587	0.00198198
ADAR	R.M[+15.99492]GFTEVTPVTGASLR.R_2		0.581786	0.439388	-0.645239	0.96238	1.22389	-0.216037	0.417532	0.379311	0.531433	0.201578	0.945396	-1.43966	0.279412	0.281502	-0.327692	0.0283189	0.932854	0.0301862	0.0656587	0.00198198
ADAR	R.VSIYDSK.R_1		0.226774	0.454287	-0.0377902	0.934454	0.492623	-0.441549	0.803791	0.0948568	0.114086	0.0108219	0.945396	-1.43966	0.279412	0.281502	-0.327692	0.0283189	0.932854	0.0301862	0.0656587	0.00198198
ADAR	R.YLNTNPVGGLLEYAR.S_2		-0.222768	0.540708	0.350514	0.00503374	0.464504	-0.115029	0.736069	0.133081	-0.104648	-0.0139268	0.945396	-1.43966	0.279412	0.281502	-0.327692	0.0283189	0.932854	0.0301862	0.0656587	0.00198198
ADD1	K.TAGPQSQVLC[+57.02146]GVVM[+15.99492]DR.S_2		0.133098	0.581259	-0.11329	-0.317854	-0.933491	0.559453	0.418683	0.378115	-0.430986	-0.162962	1.13423	0.720172	0.767996	0.0766046	-1.15909	-2.18373	0.0421599	1.3751	-1.96287	-2.69914
ADD1	K.WQIGEQEFEALM[+15.99492]R.M_2		0.486013	0.362408	-0.328129	1.46825	1.09332	0.668633	0.0578794	1.23748	0.903304	1.11782	1.13423	0.720172	0.767996	0.0766046	-1.15909	-2.18373	0.0421599	1.3751	-1.96287	-2.69914
ADD1	R.QDFN[+0.98402]MMEQK.K_2		-6.02304	1.74573	0.0977948	1.03032	-0.250134	-5.18798	0.981166	0.00825766	-0.0760931	-0.000628351	1.13423	0.720172	0.767996	0.0766046	-1.15909	-2.18373	0.0421599	1.3751	-1.96287	-2.69914
ADD1	R.SLVQGELVTASK.A_2		0.374362	0.12	0.17352	0.00885531	0.665347	-1.36299	0.494675	0.30568	-0.452223	-0.138236	1.13423	0.720172	0.767996	0.0766046	-1.15909	-2.18373	0.0421599	1.3751	-1.96287	-2.69914
ADD1	R.TLASAGGPDNLVLLNPEK.Y_2		-1.61027	-0.873963	2.1314	-0.193518	-1.07334	-0.808332	0.650346	0.186855	-0.57412	-0.107277	1.13423	0.720172	0.767996	0.0766046	-1.15909	-2.18373	0.0421599	1.3751	-1.96287	-2.69914
ADD1	R.TSTSAVPNLFVPLNTNPK.E_2		1.78464	-9.74197	-6.73161	-4.82789	-6.09574	-3.96371	0.985856	0.00618632	-0.0661354	-0.000409135	1.13423	0.720172	0.767996	0.0766046	-1.15909	-2.18373	0.0421599	1.3751	-1.96287	-2.69914
ADD3	K.EQDHIIIIPR.G_2		-0.626832	0.569589	0.650704	1.7092	0.525871	1.37569	0.137534	0.861589	1.00577	0.866558	2.75693	-2.72969	-0.758465	-2.68454	-0.231156	-2.5261	0.429845	0.366688	-1.57019	-0.575772
ADD3	K.IEDPNQFVPLN[+0.98402]TNPNEVLEK.R_3		2.06083	-3.18776	-1.38534	-4.20675	-1.82384	-4.62519	0.199843	0.699312	-2.7145	-1.89828	2.75693	-2.72969	-0.758465	-2.68454	-0.231156	-2.5261	0.429845	0.366688	-1.57019	-0.575772
ADD3	K.IEDPNQFVPLNTN[+0.98402]PNEVLEK.R_3		2.01996	-3.22863	-1.42621	-4.22321	-1.8403	-4.64165	0.203124	0.692238	-2.69009	-1.86219	2.75693	-2.72969	-0.758465	-2.68454	-0.231156	-2.5261	0.429845	0.366688	-1.57019	-0.575772
ADD3	K.SDVEIPATVTAFSFEDDTVPLSPLK.Y_2		1.97215	-1.73003	-4.9525	-4.79054			#DIV/0!	#DIV/0!	-3.22041	#DIV/0!	2.75693	-2.72969	-0.758465	-2.68454			#DIV/0!	#DIV/0!	-2.4408	#DIV/0!
ADH1A	K.FSLDALITHVLPFEK.I_3		1.00572	-0.411895	-0.829197	0.430823	0.14215	0.0640569	0.634716	0.19742	0.290801	0.0574101	0.953342	-0.423921	-0.786166	0.31594	0.0485929	-0.0281642	0.732841	0.13499	0.197704	0.0266882
ADH1B	K.FSLDALITHVLPFEK.I_3		1.00229	-0.415327	-0.832629	0.42509	0.136417	0.0583241	0.637317	0.195644	0.288501	0.0564435	-0.962856	0.713938	0.898943	2.3394	0.589607	0.50837	0.331274	0.479813	0.929119	0.445803
ADH1B	K.INEGFDLLHSGK.S_2		-2.31363	1.20049	0.690552	2.57561	1.65033	1.14771	0.174981	0.757008	1.93208	1.4626	-0.962856	0.713938	0.898943	2.3394	0.589607	0.50837	0.331274	0.479813	0.929119	0.445803
ADH1B	R.TDDHVVSGNLVTPLPVILGHEAAGIVESVGEGVTTVKPGDK.V_5		1.81246		3.29877	4.11217		2.35337	0.616008	0.210414	0.677154	0.142482	-0.962856		0.898943	2.3394		0.50837	0.380855	0.419241	1.45584	0.610349
ADH5	K.AAVAWEAGKPLSIEEIEVAPPK.A_2		-4.11333	1.68363	0.585243	-1.86524	-3.72045	-0.384024	0.533954	0.272496	-1.37508	-0.374705	1.87028	0.541837	-1.09335	1.39369	1.6441	0.518203	0.464203	0.333292	0.745745	0.248551
ADH5	K.AAVAWEAGKPLSIEEIEVAPPK.A_3		0.889307	-3.65629	1.08992	-2.04125	-3.28381	-0.781491	0.436541	0.359975	-1.4765	-0.531502	1.87028	0.541837	-1.09335	1.39369	1.6441	0.518203	0.464203	0.333292	0.745745	0.248551
ADH5	K.AGDTVIPLYIPQC[+57.02146]GEC[+57.02146]K.F_2		1.10196	-0.513441	-0.405186	-1.23623	-1.63269	-1.09128	0.0646573	1.18938	-1.38118	-1.64275	1.87028	0.541837	-1.09335	1.39369	1.6441	0.518203	0.464203	0.333292	0.745745	0.248551
ADH5	K.IIATAVC[+57.02146]HTDAYTLSGADPEGC[+57.02146]FPVILGHEGAGIVESVGEGVTK.L_4			3.56862	0.776736	1.07162	2.27277	3.73387	0.904945	0.0433779	0.186742	0.00810048		0.541837	-1.09335	1.39369	1.6441	0.518203	0.147291	0.831824	1.46109	1.21537
ADH5	K.IKVDEFVTHN[+0.98402]LSFDEINK.A_2		1.55588	-0.371716	-3.46122	-1.9957	2.97404	-7.58838	0.69138	0.160283	-1.44433	-0.231501	1.87028	0.541837	-1.09335	1.39369	1.6441	0.518203	0.464203	0.333292	0.745745	0.248551
ADH5	K.IKVDEFVTHN[+0.98402]LSFDEINK.A_3		1.06711	-0.0965167	-0.912225	3.4729	2.86272	1.87385	0.0213162	1.67129	2.71703	4.54095	1.87028	0.541837	-1.09335	1.39369	1.6441	0.518203	0.464203	0.333292	0.745745	0.248551
ADH5	K.IKVDEFVTHN[+0.98402]LSFDEINK.A_4		1.66692	-4.63871	0.253322	3.70567	1.45068	-4.91026	0.773563	0.111504	0.988184	0.110187	1.87028	0.541837	-1.09335	1.39369	1.6441	0.518203	0.464203	0.333292	0.745745	0.248551
ADH5	K.IKVDEFVTHNLSFDEINK.A_2		-8.37052	0.687766	0.941271	-0.740382	3.43834	0.772792	0.360204	0.443452	3.40408	1.50954	1.87028	0.541837	-1.09335	1.39369	1.6441	0.518203	0.464203	0.333292	0.745745	0.248551
ADH5	K.IKVDEFVTHNLSFDEINK.A_3		0.502181	0.783835	-1.25438	1.62686	1.47107	-0.204389	0.332548	0.478146	0.953972	0.456138	1.87028	0.541837	-1.09335	1.39369	1.6441	0.518203	0.464203	0.333292	0.745745	0.248551
ADH5	K.IKVDEFVTHNLSFDEINK.A_4		0.44902	1.00407	-3.81841	4.4529	5.06479	3.48324	0.0323293	1.4904	5.12208	7.63397	1.87028	0.541837	-1.09335	1.39369	1.6441	0.518203	0.464203	0.333292	0.745745	0.248551
ADH5	K.VC[+57.02146]LLGC[+57.02146]GISTGYGAAVNTAK.L_2		1.30865	-0.948713	-0.457849	2.20866		0.198232	0.364582	0.438205	1.23608	0.541657	1.87028	0.541837	-1.09335	1.39369		0.518203	0.684771	0.164455	0.516361	0.0849181
ADH5	K.VDEFVTHN[+0.98402]LSFDEINK.A_2		0.55747	0.069839	-0.0559402	1.82414	0.357561	-0.551351	0.648226	0.188273	0.352992	0.066459	1.87028	0.541837	-1.09335	1.39369	1.6441	0.518203	0.464203	0.333292	0.745745	0.248551
ADH5	K.VDEFVTHNLSFDEINK.A_2		-1.7832	1.35748	0.296863	0.127608	0.0603554	0.0725078	0.894941	0.0482054	0.129775	0.00625587	1.87028	0.541837	-1.09335	1.39369	1.6441	0.518203	0.464203	0.333292	0.745745	0.248551
ADH5	K.VDEFVTHNLSFDEINK.A_3		0.720669	0.0184548	-0.25998	0.61607	-0.238454	-0.422391	0.707336	0.150374	-0.17464	-0.0262613	1.87028	0.541837	-1.09335	1.39369	1.6441	0.518203	0.464203	0.333292	0.745745	0.248551
ADH5	M.[+42.01056]ANEVIK.C_1		0.885206	0.148285	-0.827077	-0.400874	-0.346744	0.0295248	0.581132	0.235725	-0.308169	-0.0726432	1.87028	0.541837	-1.09335	1.39369	1.6441	0.518203	0.464203	0.333292	0.745745	0.248551
ADI1	K.GDM[+15.99492]VTLPAGIYHR.F_2		0.723068	0.28498	-0.628201	1.27098	1.23822	-0.195861	0.361624	0.441743	0.644495	0.284702	0.422291	0.30158	-0.694484	-0.328366	0.396828	1.49773	0.467003	0.33068	0.512268	0.169397
ADI1	K.LDADKYENDPELEK.I_2		0.563255	-0.238769	0.262148	-0.65975	-0.0228168	3.51726	0.60063	0.221393	0.749353	0.165902	0.422291	0.30158	-0.694484	-0.328366	0.396828	1.49773	0.467003	0.33068	0.512268	0.169397
ADI1	R.QPHRPDPGRPVGLEQLR.R_3		-0.0200107	1.01567	-0.70132	-0.35292	0.479565	0.641766	0.800953	0.0963929	0.158024	0.0152324	0.422291	0.30158	-0.694484	-0.328366	0.396828	1.49773	0.467003	0.33068	0.512268	0.169397
ADIRF	K.QQVEGTAQEAVSAAGAAAQQVVDQATEAGQK.A_3		0.169791	0.772088	-0.557293	-0.40807	-1.28704	-2.21512	0.0916968	1.03765	-1.43161	-1.4855	0.792277	0.227105	-1.20515	0.530809	-1.04494	-0.33517	0.782453	0.106542	-0.221176	-0.0235644
ADIRF	K.TANQASDTFSGIGK.K_2		1.21879	-0.194055	-1.2298	0.728564	-0.857385	1.13668	0.687609	0.162659	0.404307	0.0657641	0.792277	0.227105	-1.20515	0.530809	-1.04494	-0.33517	0.782453	0.106542	-0.221176	-0.0235644
ADK	K.HKELFDELVK.K_2		0.571485	-0.392845	0.436347	1.3187	1.34733	1.11709	0.0271226	1.56667	1.05605	1.65447	-0.308114	0.58238	0.0443227	-0.250327	-1.56488	1.62644	0.86893	0.0610153	-0.169117	-0.0103187
ADK	K.VAQWM[+15.99492]IQQPHK.A_2		-1.07703	0.83568	0.664307	-0.224527	0.0855676	1.93725	0.641028	0.193123	0.458446	0.0885366	-0.308114	0.58238	0.0443227	-0.250327	-1.56488	1.62644	0.86893	0.0610153	-0.169117	-0.0103187
ADK	K.VEYHAGGSTQNSIK.V_2		-3.08442	1.34175	0.632782	-1.11007	1.43728	0.384132	0.716802	0.144601	0.607075	0.0877834	-0.308114	0.58238	0.0443227	-0.250327	-1.56488	1.62644	0.86893	0.0610153	-0.169117	-0.0103187
ADK	K.VM[+15.99492]PYVDILFGN[+0.98402]ETEAATFAR.E_2		-0.358362	1.39568	-2.27759	-2.1494	-4.83953	-4.15165	0.0684921	1.16436	-3.30011	-3.84251	-0.308114	0.58238	0.0443227	-0.250327	-1.56488	1.62644	0.86893	0.0610153	-0.169117	-0.0103187
ADK	K.VM[+15.99492]PYVDILFGNETEAATFAR.E_2		1.16664	-0.496001	-0.760438	-2.16389	-1.51484	0.876595	0.458747	0.338426	-0.904112	-0.305975	-0.308114	0.58238	0.0443227	-0.250327	-1.56488	1.62644	0.86893	0.0610153	-0.169117	-0.0103187
ADK	K.VM[+15.99492]PYVDILFGNETEAATFAR.E_3		-2.49135	1.68188	0.303192	0.00136866	-2.97206	-0.132663	0.609465	0.215052	-0.86569	-0.186168	-0.308114	0.58238	0.0443227	-0.250327	-1.56488	1.62644	0.86893	0.0610153	-0.169117	-0.0103187
ADK	K.YSLKPNDQILAEDK.H_2		-0.378906	0.366287	0.68814	1.90359	-0.228705	0.892835	0.413714	0.3833	0.630733	0.24176	-0.308114	0.58238	0.0443227	-0.250327	-1.56488	1.62644	0.86893	0.0610153	-0.169117	-0.0103187
ADK	K.YSLKPNDQILAEDK.H_3		0.855036	-0.94678	0.429114	-1.41008	-1.59068	-0.406248	0.130178	0.885462	-1.24813	-1.10517	-0.308114	0.58238	0.0443227	-0.250327	-1.56488	1.62644	0.86893	0.0610153	-0.169117	-0.0103187
ADK	R.IVIFTQGR.D_1		1.08181	-2.48154	-11.3157	1.89622	0.458029	4.98625	0.163291	0.787038	6.68532	5.26161	-0.308114	0.58238	0.0443227	-0.250327	-1.56488	1.62644	0.86893	0.0610153	-0.169117	-0.0103187
ADNP	K.SYEALVQHVIEDHER.I_3		0.181932	0.102923	0.411245	1.8681	0.80764	0.804075	0.0642828	1.19191	0.927904	1.10597	-0.348905	0.0830264	0.459446	1.12952	0.21599	1.27242	0.116744	0.932765	0.808121	0.753786
ADNP	R.LSIPKPNLNSTGVNMMSSVHLQQNNYGVK.S_4		-0.358596	0.42429	0.625316	1.1288	0.736809	2.43362	0.112994	0.946943	1.20274	1.13892	-0.348905	0.0830264	0.459446	1.12952	0.21599	1.27242	0.116744	0.932765	0.808121	0.753786
ADPGK	K.ETFHDIAQVASEFPGAQHYVGGN[+0.98402]AALIGQK.F_4		-0.780513	1.03659	0.125749	3.41956	2.32027	0.998384	0.072574	1.13922	2.11879	2.41377	-0.858604	0.416953	0.491684	0.82972	1.22458	1.54454	0.0710854	1.14822	1.18293	1.35827
ADPGK	R.IVLNPNKPVVEWHR.E_3		-0.873189	0.383648	1.02121	1.4842	2.96236	4.48932	0.0530987	1.27492	2.8014	3.57155	-0.858604	0.416953	0.491684	0.82972	1.22458	1.54454	0.0710854	1.14822	1.18293	1.35827
ADPGK	R.NDLEEAFIHFM[+15.99492]GK.G_2		0.325945	-0.244723	0.591985	0.100799	0.195427	1.21048	0.555599	0.255239	0.277834	0.0709139	-0.858604	0.416953	0.491684	0.82972	1.22458	1.54454	0.0710854	1.14822	1.18293	1.35827
ADPGK	R.TVGLGDAISAEGLFYSEVHPHY.-_4		0.113223	0.365758	-0.200967	-0.608626	-0.25214	-0.805536	0.0481901	1.31704	-0.648105	-0.853582	-0.858604	0.416953	0.491684	0.82972	1.22458	1.54454	0.0710854	1.14822	1.18293	1.35827
ADPRHL2	K.KDPDRGYGAGVVTVFK.K_2		0.348789	0.371947	-0.121613	-0.170694	-1.48518	0.0629097	0.223687	0.65036	-0.730696	-0.475215	-0.858751	-0.0369431	0.594	-0.243401	0.158915	0.547994	0.622323	0.205984	0.255067	0.0525399
ADPRHL2	R.ELGM[+15.99492]EERPYSSR.L_2		-1.47221	0.489071	1.18236	-0.0680681	1.0506	1.33255	0.478265	0.320331	0.705285	0.225925	-0.858751	-0.0369431	0.594	-0.243401	0.158915	0.547994	0.622323	0.205984	0.255067	0.0525399
ADPRHL2	R.GYGAGVVTVFK.K_2		1.36841	-1.33561	-0.275276	-1.06278	-0.971526	-0.378867	0.424964	0.371648	-0.723566	-0.268911	-0.858751	-0.0369431	0.594	-0.243401	0.158915	0.547994	0.622323	0.205984	0.255067	0.0525399
ADPRHL2	R.HVQSLEPDPGTPGSER.T_2		-2.36808	1.41052	0.380006	-0.657064	0.466276	0.794643	0.761212	0.118494	0.393805	0.0466636	-0.858751	-0.0369431	0.594	-0.243401	0.158915	0.547994	0.622323	0.205984	0.255067	0.0525399
ADPRHL2	R.VAGISLAYSSVQDVQK.F_2		0.34949	-0.512513	0.791844	1.46716	1.52748	-0.0928496	0.311223	0.506928	0.757656	0.384077	-0.858751	-0.0369431	0.594	-0.243401	0.158915	0.547994	0.622323	0.205984	0.255067	0.0525399
ADRM1	K.YLVEFRAGKMSLKGTTVTPDK.R_3			1.20225	5.22167	2.38649	3.06418	5.53235	0.831911	0.0799232	0.449045	0.0358891		0.172769	0.95207	0.114272	0.104125	-0.486577	0.191073	0.718801	-0.651813	-0.468524
ADRM1	M.[+42.01056]TTSGALFPSLVPGSR.G_2		-0.0923099	0.296609	0.534476	-0.183497	-0.261126	0.438996	0.436287	0.360228	-0.248134	-0.0893848	0.284562	0.172769	0.95207	0.114272	0.104125	-0.486577	0.149594	0.825087	-0.559193	-0.461383
ADRM1	R.LFFWMQEPK.T_2		0.565123	0.628812	-0.998719	-0.25401	0.142216	-1.18117	0.494756	0.305609	-0.496059	-0.1516	0.284562	0.172769	0.95207	0.114272	0.104125	-0.486577	0.149594	0.825087	-0.559193	-0.461383
ADRM1	R.TSGNVEDDLIIFPDDC[+57.02146]EFK.R_2		0.538919	0.353673	-0.447826	-0.918276	-1.94237	-1.09917	0.028382	1.54696	-1.46819	-2.27123	0.284562	0.172769	0.95207	0.114272	0.104125	-0.486577	0.149594	0.825087	-0.559193	-0.461383
ADSL	K.GTTGTQASFLQLFEGDDHKVEQLDK.M_3		0.821213	-0.109081	-0.272466	-1.96789	-2.38707	-1.0364	0.0207588	1.6828	-1.94368	-3.27082	-1.00869	0.529273	0.510251	-0.0970899	-0.951989	-0.00652554	0.573703	0.241313	-0.362145	-0.0873902
ADSL	K.GTTGTQASFLQLFEGDDHKVEQLDK.M_4		0.885099	0.0614489	-0.700436	-0.363533	0.250085	-0.772527	0.527358	0.277894	-0.377362	-0.104867	-1.00869	0.529273	0.510251	-0.0970899	-0.951989	-0.00652554	0.573703	0.241313	-0.362145	-0.0873902
ADSL	K.QQIGSSAM[+15.99492]PYK.R_2		-0.786497	1.38637	-0.486031	-1.18032	0.466837	-0.923681	0.530403	0.275394	-0.58367	-0.160739	-1.00869	0.529273	0.510251	-0.0970899	-0.951989	-0.00652554	0.573703	0.241313	-0.362145	-0.0873902
ADSL	M.[+42.01056]AAGGDHGSPDSYR.S_2		-3.28042	1.29456	0.762016	-2.67115	-1.81539	-2.02625	0.295795	0.52901	-1.76299	-0.932638	-1.00869	0.529273	0.510251	-0.0970899	-0.951989	-0.00652554	0.573703	0.241313	-0.362145	-0.0873902
ADSL	R.AFIITGQTYTR.K_2		0.533045	0.00934316	0.0652022	-1.21976	-1.50178	-1.86249	0.00226315	2.64529	-1.73054	-4.57777	-1.00869	0.529273	0.510251	-0.0970899	-0.951989	-0.00652554	0.573703	0.241313	-0.362145	-0.0873902
ADSL	R.ASLPTLGFTHFQPAQLTTVGK.R_2		0.171284	-13.8646	-15.2091	-0.862164	-6.14766	-11.1408	0.566487	0.24681	3.58393	0.88455	-1.00869	0.529273	0.510251	-0.0970899	-0.951989	-0.00652554	0.573703	0.241313	-0.362145	-0.0873902
ADSL	R.ASLPTLGFTHFQPAQLTTVGK.R_3		0.0305017	-0.0414124	0.726144	1.85312	1.85128	2.13052	0.00285721	2.54406	1.70656	4.3416	-1.00869	0.529273	0.510251	-0.0970899	-0.951989	-0.00652554	0.573703	0.241313	-0.362145	-0.0873902
ADSL	R.FLEEEVYPLLKPYESVM[+15.99492]K.V_3		0.503291	-0.624448	0.694492	0.0641048	0.00168992	0.459953	0.972708	0.0120174	-0.0158626	-0.000190626	-1.00869	0.529273	0.510251	-0.0970899	-0.951989	-0.00652554	0.573703	0.241313	-0.362145	-0.0873902
ADSL	R.KVDIEVLSVLASLGASVHK.I_3		-2.34004	-0.152719	2.26771	0.319489	0.056934	1.03425	0.709451	0.149078	0.545243	0.0812837	-1.00869	0.529273	0.510251	-0.0970899	-0.951989	-0.00652554	0.573703	0.241313	-0.362145	-0.0873902
ADSL	R.N[+0.98402]ALDLLLPK.L_1		-0.35148	-0.554901	2.40704	15.959	16.2194	12.3353	0.000809606	3.09173	14.3377	44.3282	-1.00869	0.529273	0.510251	-0.0970899	-0.951989	-0.00652554	0.573703	0.241313	-0.362145	-0.0873902
ADSL	R.VLSQQAASVVK.Q_2		0.106699	1.29618	-1.91813	1.72935	1.22555	1.90048	0.135612	0.867702	1.79021	1.55337	-1.00869	0.529273	0.510251	-0.0970899	-0.951989	-0.00652554	0.573703	0.241313	-0.362145	-0.0873902
ADSS	K.ELPVNAQNYVR.F_2		-1.24806	1.10434	0.389475	3.81487	4.09685	1.9323	0.0302502	1.51927	3.19942	4.86079	-0.475449	0.361193	0.735643	0.95545	0.340312	0.718503	0.310632	0.507754	0.464293	0.235746
ADSS	K.LDGEIIPHIPANQEVLNK.V_3		1.19122	-0.669022	-0.427442	-0.694624	-0.696565	-0.506608	0.321365	0.493001	-0.664184	-0.327444	-0.475449	0.361193	0.735643	0.95545	0.340312	0.718503	0.310632	0.507754	0.464293	0.235746
ADSS	K.LDILDM[+15.99492]FTEIK.V_2		-0.812657	0.286972	1.14292	-0.138394	-0.210157	-0.0721191	0.574962	0.240361	-0.345968	-0.0831573	-0.475449	0.361193	0.735643	0.95545	0.340312	0.718503	0.310632	0.507754	0.464293	0.235746
ADSS	R.AHIVFDFHQAADGIQEQQR.Q_2		-1.03665	0.473994	1.0368	1.15339	1.21207	1.7038	0.135895	0.866796	1.19837	1.03875	-0.475449	0.361193	0.735643	0.95545	0.340312	0.718503	0.310632	0.507754	0.464293	0.235746
ADSS	R.DGVYFLYEALHGPPK.K_2		-0.328475	0.802737	0.0400414	1.38555	1.10829	0.989855	0.0486663	1.31277	0.989799	1.29938	-0.475449	0.361193	0.735643	0.95545	0.340312	0.718503	0.310632	0.507754	0.464293	0.235746
ADSS	R.DGVYFLYEALHGPPK.K_3		-0.32379	-0.0639743	1.05374	0.292246	0.362918	-0.187892	0.891691	0.0497858	-0.0662325	-0.00329744	-0.475449	0.361193	0.735643	0.95545	0.340312	0.718503	0.310632	0.507754	0.464293	0.235746
ADSS	R.FIEDELQIPVK.W_2		0.335396	0.186825	0.144349	-0.675677	-0.822947	0.442684	0.228089	0.641896	-0.57417	-0.368557	-0.475449	0.361193	0.735643	0.95545	0.340312	0.718503	0.310632	0.507754	0.464293	0.235746
ADSS	R.VGIGAFPTEQDNEIGELLQTR.G_2		1.20491	-0.0462557	-3.9564	0.27256	-2.12421	0.309412	0.822805	0.0847033	0.418505	0.0354487	-0.475449	0.361193	0.735643	0.95545	0.340312	0.718503	0.310632	0.507754	0.464293	0.235746
AFAP1	K.ITQQGTDPLVLAVQSK.E_2		-1.05895	-0.403101	1.64932	0.347714	-1.06002	-0.763124	0.579923	0.23663	-0.554232	-0.131148	-0.160234	-1.17245	1.2144	1.09423	-1.36912	0.886896	0.827901	0.0820218	0.243431	0.0199666
AFAP1	K.THIVSIPLR.G_2		0.378697	0.316613	-0.09493	-0.621901	-0.93263	0.284124	0.188726	0.724167	-0.623596	-0.451588	-0.160234	-1.17245	1.2144	1.09423	-1.36912	0.886896	0.827901	0.0820218	0.243431	0.0199666
AFAP1	R.HQWPSEEASM[+15.99492]DLVK.D_2		0.746387	-1.96093	1.13434	2.75924	-0.410748	2.58307	0.303529	0.517799	1.67059	0.865029	-0.160234	-1.17245	1.2144	1.09423	-1.36912	0.886896	0.827901	0.0820218	0.243431	0.0199666
AFDN	K.EIILDDDEC[+57.02146]PLQIFR.E_2		-1.20063	0.840981	0.737374	-0.817176	-0.36551	0.189191	0.562589	0.249809	-0.457072	-0.114181	-0.636611	1.08775	1.2651	-0.4468	0.639842	-0.85005	0.352279	0.453113	-0.791082	-0.35845
AFDN	K.KLPGDDRLM[+15.99492]K.N_2		-0.650538	-0.651505	1.58408	2.06213	1.98019	0.711874	0.15946	0.797349	1.49072	1.18862	-0.636611	1.08775	1.2651	-0.4468	0.639842	-0.85005	0.352279	0.453113	-0.791082	-0.35845
AFDN	K.PSTLQRPQETVIR.E_3		1.22468	-0.509083	-1.10468	-2.38507	-2.61971	-5.71468	0.054687	1.26212	-3.44346	-4.34604	-0.636611	1.08775	1.2651	-0.4468	0.639842	-0.85005	0.352279	0.453113	-0.791082	-0.35845
AFDN	K.TILLSTTDPADFAVAEALEK.Y_4				8.55087		9.55911		#DIV/0!	#DIV/0!	1.00824	#DIV/0!			1.2651		0.639842		#DIV/0!	#DIV/0!	-0.625254	#DIV/0!
AFDN	K.TPAAIPATPVAVSQPIR.T_2		0.388186	0.455046	-7.2205		4.88572	7.56268	0.0933614	1.02983	8.34996	8.59906	-0.636611	1.08775	1.2651		0.639842	-0.85005	0.531357	0.274613	-0.677184	-0.185964
AFDN	K.VQFGASHVFK.F_2		-0.326678	1.05006	-0.277619	-0.478055	-0.0579365	-1.11417	0.269544	0.56937	-0.698643	-0.397786	-0.636611	1.08775	1.2651	-0.4468	0.639842	-0.85005	0.352279	0.453113	-0.791082	-0.35845
AFDN	R.DLQYITVSKEELSSGDSLSPDPWK.R_3		-0.868467	1.42866	-0.718947	-1.42771	-0.173392	0.718525	0.81555	0.0885494	-0.241274	-0.0213647	-0.636611	1.08775	1.2651	-0.4468	0.639842	-0.85005	0.352279	0.453113	-0.791082	-0.35845
AFDN	R.ITLDAQDVLAHLVQM[+15.99492]AFK.Y_3		0.374364	-0.127757	0.173292	0.0444287	-0.634888	-0.152123	0.194699	0.710637	-0.387494	-0.275367	-0.636611	1.08775	1.2651	-0.4468	0.639842	-0.85005	0.352279	0.453113	-0.791082	-0.35845
AFDN	R.N[+0.98402]IPNGLQEFLDPLC[+57.02146]QR.G_3		-1.20818	0.830635	0.767537	-0.319923	0.27211	-0.0866468	0.81278	0.090027	-0.174816	-0.0157382	-0.636611	1.08775	1.2651	-0.4468	0.639842	-0.85005	0.352279	0.453113	-0.791082	-0.35845
AGAP3	R.ATPATAPGTSPR.A_2		-0.28119	1.38577	-1.20661	0.147829	0.134364	-0.952519	0.832934	0.0793892	-0.189433	-0.0150389	-0.33211	1.23781	-1.14091	0.252497	0.244126	-0.770089	0.987684	0.00538187	-0.0127507	-6.86224e-05
AGFG1	K.APVGSVVSVPSQSSASSDK.Y_2		-0.188971	0.168834	0.700403	-2.08696	-2.00646	0.833801	0.257176	0.58977	-1.3133	-0.774543	-1.04017	1.87099	-0.103246	-1.83881	-2.72859	1.03762	0.375376	0.425534	-1.41912	-0.603885
AGFG1	K.SLLGDSAPTLHLNK.G_2		0.69842	0.225872	-0.493669	0.753814	-0.31617	0.929387	0.581502	0.235449	0.312136	0.0734921	-1.04017	1.87099	-0.103246	-1.83881	-2.72859	1.03762	0.375376	0.425534	-1.41912	-0.603885
AGFG1	K.SSSADFGTFNTSQSHQTASAVSK.V_2		0.405532	0.882051	-5.52491	-3.16392	-3.01815	0.463827	0.845666	0.072801	-0.493639	-0.0359374	-1.04017	1.87099	-0.103246	-1.83881	-2.72859	1.03762	0.375376	0.425534	-1.41912	-0.603885
AGFG1	K.YAALAN[+0.98402]LDNIFSAGQGGDQGSGFGTTGK.A_2		-0.884917	1.16438	-0.572379	1.51925	5.64364	0.217534	0.218805	0.659942	2.55778	1.68799	-1.04017	1.87099	-0.103246	-1.83881	-2.72859	1.03762	0.375376	0.425534	-1.41912	-0.603885
AGFG1	K.YAALANLDN[+0.98402]IFSAGQGGDQGSGFGTTGK.A_2		-0.883281	1.16602	-0.570743	1.51258	5.63697	0.210859	0.220034	0.657511	2.54947	1.6763	-1.04017	1.87099	-0.103246	-1.83881	-2.72859	1.03762	0.375376	0.425534	-1.41912	-0.603885
AGFG1	K.YAALANLDNIFSAGQGGDQGSGFGTTGK.A_2		-3.12447	2.04452	-0.111116	-4.76375	-4.76609	-0.891104	0.194909	0.710168	-3.07663	-2.18492	-1.04017	1.87099	-0.103246	-1.83881	-2.72859	1.03762	0.375376	0.425534	-1.41912	-0.603885
AGFG1	K.YAALANLDNIFSAGQGGDQGSGFGTTGK.A_3		-1.12338	0.849786	0.67455	-0.758481	-0.714864	0.30721	0.508477	0.293729	-0.522365	-0.153434	-1.04017	1.87099	-0.103246	-1.83881	-2.72859	1.03762	0.375376	0.425534	-1.41912	-0.603885
AGFG1	R.VKS[+406.15875]IS[+406.15875]MTTFTQQEIEFLQK.H_3	TRUE	-1.0324	-0.293802	1.60115	3.52886	2.97739	3.88663	0.0151623	1.81923	3.37264	6.13563	-1.04017	1.87099	-0.103246	-1.83881	-2.72859	1.03762	0.375376	0.425534	-1.41912	-0.603885
AGK	K.GETVPLDVLQIK.G_2		0.165522	1.14805	-1.53633	-0.90255	-1.45359	-1.18191	0.239364	0.620941	-1.1051	-0.686201	0.771209	-0.0615957	-1.01292	0.126819	-0.0647514	-0.032156	0.840944	0.0752328	0.111072	0.00835623
AGK	K.IPIGFIPLGETSSLSHTLFAESGNK.V_3		1.15921	-1.05984	-0.0118483	1.11599	1.35943	1.14211	0.142419	0.846432	1.17667	0.995967	0.771209	-0.0615957	-1.01292	0.126819	-0.0647514	-0.032156	0.840944	0.0752328	0.111072	0.00835623
AGPS	K.ETNISYSQEADDRVFRAHGHC[+57.02146]LHEIFLLR.E_7		-0.108249	-0.0131446	0.867057	-0.384702	-0.644359	0.971103	0.672986	0.171994	-0.267874	-0.0460727	0.314898	0.716484	-0.524246	0.0109741	0.576183	1.35195	0.421565	0.375135	0.477323	0.179061
AGPS	K.EWIQNTLGVN[+0.98402]VEHK.T_3		0.448722	-0.103868	0.118864	-1.2257	-1.54622	-1.63225	0.00131941	2.87962	-1.62263	-4.67256	0.314898	0.716484	-0.524246	0.0109741	0.576183	1.35195	0.421565	0.375135	0.477323	0.179061
AGPS	K.EYVDPNNIFGNR.N_2		0.852998	0.0661987	-0.628605	-0.494228	-0.446416	-0.500879	0.248941	0.603903	-0.577372	-0.348677	0.314898	0.716484	-0.524246	0.0109741	0.576183	1.35195	0.421565	0.375135	0.477323	0.179061
AGPS	K.GFDPNQLSVATLLFEGDR.E_2		-2.78396	1.47089	0.7691	0.666532	0.576082	1.68754	0.443813	0.3528	1.15804	0.408557	0.314898	0.716484	-0.524246	0.0109741	0.576183	1.35195	0.421565	0.375135	0.477323	0.179061
AGPS	K.GFDPNQLSVATLLFEGDREK.V_3		0.484099	0.179332	-0.246881	-0.165814	0.197769	0.258557	0.87469	0.0581458	-0.0420126	-0.00244286	0.314898	0.716484	-0.524246	0.0109741	0.576183	1.35195	0.421565	0.375135	0.477323	0.179061
AGPS	K.GQIELT[+406.15875]GKRYPLS[+406.15875]GMGLPTFK.E_3	TRUE	-0.407772	-1.57025	2.80265			-2.49504	#DIV/0!	#DIV/0!	-2.76992	#DIV/0!	0.314898	0.716484	-0.524246			1.35195	#DIV/0!	#DIV/0!	1.1829	#DIV/0!
AGPS	K.IRPVPEYQK.Y_2		-1.15824	-1.14116	1.99247	-1.78865	-1.18602	-1.21335	0.29153	0.535317	-1.2937	-0.692538	0.314898	0.716484	-0.524246	0.0109741	0.576183	1.35195	0.421565	0.375135	0.477323	0.179061
AGPS	K.NIYGNIEDLVVHIK.M_3		0.824652	-0.228424	-0.280522	-0.0376089	0.333055	0.805982	0.579567	0.236896	0.261907	0.0620448	0.314898	0.716484	-0.524246	0.0109741	0.576183	1.35195	0.421565	0.375135	0.477323	0.179061
AGPS	R.AASAATAAPTATPAAQESGTIPK.K_2		2.22506	-4.79073	-1.73015	0.626295	1.72065	-6.25219	0.96966	0.0133806	0.130192	0.00174204	0.314898	0.716484	-0.524246	0.0109741	0.576183	1.35195	0.421565	0.375135	0.477323	0.179061
AGPS	R.EEILAN[+0.98402]GGSLSHHHGVGK.L_2		-0.54658	1.72699	-4.05134	1.46895	3.5306	4.28713	0.0973442	1.01169	4.05254	4.09991	0.314898	0.716484	-0.524246	0.0109741	0.576183	1.35195	0.421565	0.375135	0.477323	0.179061
AGPS	R.EEILAN[+0.98402]GGSLSHHHGVGK.L_3		0.806751	0.547607	-1.61551	-0.659813	-0.0288117	0.326317	0.969178	0.0135964	-0.0337202	-0.000458473	0.314898	0.716484	-0.524246	0.0109741	0.576183	1.35195	0.421565	0.375135	0.477323	0.179061
AGPS	R.GISDPLTVFEQTEAAAR.E_2		-0.895424	0.916888	0.439179	-0.305733	-0.151884	0.0155979	0.613541	0.212156	-0.300887	-0.063835	0.314898	0.716484	-0.524246	0.0109741	0.576183	1.35195	0.421565	0.375135	0.477323	0.179061
AGPS	R.PVPEYQKYGSVAFPNFEQGVAC[+57.02146]LR.E_3		0.559306	0.254844	-0.310899	-0.99508	-0.493432	0.229413	0.250388	0.601386	-0.58745	-0.353284	0.314898	0.716484	-0.524246	0.0109741	0.576183	1.35195	0.421565	0.375135	0.477323	0.179061
AGPS	R.QEVMKWNGWGYNDSKFIFNK.K_4		0.239754	0.567458	-0.489351	0.887754	1.01693	1.76074	0.0544257	1.2642	1.11586	1.41066	0.314898	0.716484	-0.524246	0.0109741	0.576183	1.35195	0.421565	0.375135	0.477323	0.179061
AGPS	R.VTQTYDAGAC[+57.02146]IYFYFAFNYR.G_3		0.454292		4.25155	5.4142	7.35828	4.02394	0.183906	0.735404	3.24589	2.38704	0.314898		-0.524246	0.0109741	0.576183	1.35195	0.293577	0.532278	0.751043	0.399764
AGTRAP	R.SAYQTIDSAEAPADPFAVPEGR.S_2		0.0145395	-1.92939	1.73766	-0.627898	-0.748753	0.508417	0.84874	0.0712252	-0.230344	-0.0164063	-0.0368053	-1.89493	1.58993	-0.444619	-0.565206	0.608102	0.986047	0.0061026	-0.0199732	-0.000121889
AHCTF1	K.EISEASENIYSDVR.G_2		-0.686434	1.20333	-0.295436	4.79595	7.66307	2.08428	0.0492664	1.30745	4.77395	6.2417	-0.602903	-0.0651782	0.709925	0.506166	0.459523	0.3193	0.342546	0.465281	0.414382	0.192804
AHCTF1	K.EPINSTTPFN[+0.98402]SSK.I_2		0.216294	0.109171	0.357752	-1.83907	-1.96884	0.037223	0.0851053	1.07004	-1.48464	-1.58862	-0.602903	-0.0651782	0.709925	0.506166	0.459523	0.3193	0.342546	0.465281	0.414382	0.192804
AHCTF1	K.EPINSTTPFNSSK.I_2		0.205882	0.497739	-0.10583	-0.408897	0.74021	-0.879918	0.496725	0.303884	-0.382132	-0.116124	-0.602903	-0.0651782	0.709925	0.506166	0.459523	0.3193	0.342546	0.465281	0.414382	0.192804
AHCTF1	K.IGEVWAS[+1238.41845]K.E_2	TRUE	-2.97614	-0.692478	2.35459	-3.01385	-4.60351	-7.85758	0.0880202	1.05542	-4.7203	-4.98189	-0.602903	-0.0651782	0.709925	0.506166	0.459523	0.3193	0.342546	0.465281	0.414382	0.192804
AHCTF1	K.VAIAENLLDVIK.D_2		0.627834	0.646361	-1.55975	-0.830386	-1.22555	-2.94923	0.183519	0.736319	-1.5732	-1.15838	-0.602903	-0.0651782	0.709925	0.506166	0.459523	0.3193	0.342546	0.465281	0.414382	0.192804
AHCTF1	K.YPPASLHAVLDMYLLDGVTEAAK.H_3		0.599638	-0.7439	0.69416	-0.107096	-0.591111	0.53336	0.696036	0.157368	-0.238249	-0.0374927	-0.602903	-0.0651782	0.709925	0.506166	0.459523	0.3193	0.342546	0.465281	0.414382	0.192804
AHCTF1	R.ASELHLLETPLVVK.K_3		-1.8629	-2.32733	2.92096		3.19135	3.51954	0.179854	0.74508	3.77854	2.81531	-0.602903	-0.0651782	0.709925		0.459523	0.3193	0.503046	0.298392	0.375464	0.112035
AHCTF1	R.SLPSSSQLKGSPQAISR.A_3		-0.610436	0.403678	0.907337	0.0362091	0.201064	0.520042	0.969727	0.0133504	0.0189118	0.000252479	-0.602903	-0.0651782	0.709925	0.506166	0.459523	0.3193	0.342546	0.465281	0.414382	0.192804
AHCTF1	R.YTLDLTGGM[+15.99492]FPLR.G_2		-0.150996	0.420244	0.418113	1.73622	2.1226	1.6128	0.00284614	2.54574	1.59476	4.05984	-0.602903	-0.0651782	0.709925	0.506166	0.459523	0.3193	0.342546	0.465281	0.414382	0.192804
AHCY	K.AGIPVYAWK.G_2		1.69386	-2.02076	-0.677345	-0.657582	-3.60444	-1.41795	0.327912	0.484242	-1.55857	-0.754727	0.843419	-0.872606	-0.174221	0.772236	-0.0735815	0.153183	0.563121	0.249399	0.351748	0.0877255
AHCY	K.ALDIAENEM[+15.99492]PGLM[+15.99492]R.M_2		0.220039	0.189092	0.335577	2.30991	1.57669	0.850439	0.0348106	1.45829	1.33078	1.94065	0.843419	-0.872606	-0.174221	0.772236	-0.0735815	0.153183	0.563121	0.249399	0.351748	0.0877255
AHCY	K.ALDIAENEMPGLMR.M_2		0.856831	-0.739651	0.28845	3.00363	2.3615	1.89362	0.0157726	1.8021	2.28437	4.11666	0.843419	-0.872606	-0.174221	0.772236	-0.0735815	0.153183	0.563121	0.249399	0.351748	0.0877255
AHCY	K.DGPLNM[+15.99492]ILDDGGDLTNLIHTK.Y_3		-0.283431	1.17584	-0.907254	1.99624	2.76393	-0.280084	0.245863	0.609306	1.49831	0.91293	0.843419	-0.872606	-0.174221	0.772236	-0.0735815	0.153183	0.563121	0.249399	0.351748	0.0877255
AHCY	K.DGPLNMILDDGGDLTNLIHTK.Y_3		-0.365338	0.894561	-0.0678783	-0.798515	-0.131859	0.380174	0.545323	0.263346	-0.337182	-0.0887956	0.843419	-0.872606	-0.174221	0.772236	-0.0735815	0.153183	0.563121	0.249399	0.351748	0.0877255
AHCY	K.KLDEAVAEAHLGK.L_2		0.535812	0.497166	-0.63033	2.34745	2.77042	0.692248	0.0716581	1.14473	1.80249	2.06337	0.843419	-0.872606	-0.174221	0.772236	-0.0735815	0.153183	0.563121	0.249399	0.351748	0.0877255
AHCY	K.VADIGLAAWGR.K_2		0.451043	-0.338256	0.535954	0.961509	0.326039	0.684749	0.256582	0.590773	0.441185	0.26064	0.843419	-0.872606	-0.174221	0.772236	-0.0735815	0.153183	0.563121	0.249399	0.351748	0.0877255
AHCY	K.VAVVAGYGDVGK.G_2		1.26684	-3.1938	0.540311	-4.00458	-3.92349	-2.76019	0.0974854	1.01106	-3.10054	-3.13483	0.843419	-0.872606	-0.174221	0.772236	-0.0735815	0.153183	0.563121	0.249399	0.351748	0.0877255
AHCY	K.VPAINVN[+0.98402]DSVTK.S_2		0.656855	-0.526616	0.399824	-0.229228	0.5076	-0.1853	0.752601	0.123435	-0.145663	-0.01798	0.843419	-0.872606	-0.174221	0.772236	-0.0735815	0.153183	0.563121	0.249399	0.351748	0.0877255
AHCY	K.VPAINVNDSVTK.S_2		0.386063	-0.244146	0.520305	0.590387	0.469364	1.34737	0.183343	0.736735	0.581631	0.428508	0.843419	-0.872606	-0.174221	0.772236	-0.0735815	0.153183	0.563121	0.249399	0.351748	0.0877255
AHCY	K.WLNENAVEK.V_1		-0.955334	1.37768	-0.289616	-1.79321	-1.59144	-2.15382	0.0569233	1.24471	-1.8904	-2.353	0.843419	-0.872606	-0.174221	0.772236	-0.0735815	0.153183	0.563121	0.249399	0.351748	0.0877255
AHCY	K.WLNENAVEK.V_2		0.364776	0.290823	-0.0447334	0.665574	-0.0390104	0.0187209	0.966743	0.0146891	0.0114729	0.000168526	0.843419	-0.872606	-0.174221	0.772236	-0.0735815	0.153183	0.563121	0.249399	0.351748	0.0877255
AHCY	K.YPQLLPGIR.G_2		0.0400463	0.16988	0.478611	0.488001	-0.142696	1.20674	0.522268	0.282107	0.287836	0.0812004	0.843419	-0.872606	-0.174221	0.772236	-0.0735815	0.153183	0.563121	0.249399	0.351748	0.0877255
AHCY	K.YPVGVHFLPK.K_2		1.12826	-0.506114	-0.454246	0.539504	-0.371064	-0.499037	0.80444	0.0945061	-0.166166	-0.0157037	0.843419	-0.872606	-0.174221	0.772236	-0.0735815	0.153183	0.563121	0.249399	0.351748	0.0877255
AHCY	R.GISEETTTGVHNLYK.M_2		0.393345	0.633549	-0.584797	-0.387723	-0.858454	0.454643	0.485073	0.314193	-0.41121	-0.129199	0.843419	-0.872606	-0.174221	0.772236	-0.0735815	0.153183	0.563121	0.249399	0.351748	0.0877255
AHCY	R.GISEETTTGVHNLYK.M_3		0.519067	-0.7677	0.755409	0.831566	0.474946	1.81669	0.232544	0.633495	0.872141	0.552497	0.843419	-0.872606	-0.174221	0.772236	-0.0735815	0.153183	0.563121	0.249399	0.351748	0.0877255
AHCYL1	R.GIVEESVTGVHR.L_2		0.0356169	1.01178	-0.733013	0.164774	0.431095	2.23025	0.366007	0.436511	0.837247	0.365467	-0.0949856	0.820494	-0.76564	-0.247255	-0.000585818	1.66771	0.555294	0.255477	0.486667	0.124332
AHCYL2	K.GIVEESVTGVHR.L_2		0.0279214	1.00408	-0.740708	0.141758	0.408079	2.20724	0.373935	0.427204	0.821926	0.35113	-0.0949856	0.820494	-0.76564	-0.247255	-0.000585818	1.66771	0.555294	0.255477	0.486667	0.124332
AHNAK	K.ADIDISGPN[+0.98402]VDVDVPDVNIEGPDAK.L_2		-0.971739	-0.176481	1.64405	-2.78563	-0.370168	-3.63856	0.12335	0.908861	-2.43006	-2.20859	0.121159	-0.321361	-0.0277673	-0.905045	-0.923797	-1.36841	0.00770952	2.11297	-0.98976	-2.09134
AHNAK	K.ADIDISGPNVDVDVPDVNIEGPDAK.L_2		-2.53667	2.33652	-5.34505	-3.78597	-3.80292	-4.2788	0.401928	0.395852	-2.10749	-0.834254	0.121159	-0.321361	-0.0277673	-0.905045	-0.923797	-1.36841	0.00770952	2.11297	-0.98976	-2.09134
AHNAK	K.ADIDVSGPSVDTDAPDLDIEGPEGK.L_2		-0.572462	0.685314	0.511543	-1.00059	1.85515	3.50737	0.415911	0.380999	1.24584	0.474665	0.121159	-0.321361	-0.0277673	-0.905045	-0.923797	-1.36841	0.00770952	2.11297	-0.98976	-2.09134
AHNAK	K.ADVDISGPK.I_1		-1.20603	-1.606	2.11565	-3.66523	-2.74289	-0.809498	0.207935	0.682073	-2.17375	-1.48266	0.121159	-0.321361	-0.0277673	-0.905045	-0.923797	-1.36841	0.00770952	2.11297	-0.98976	-2.09134
AHNAK	K.AEASIQAGAGDGEWEESEVK.L_2		-1.62939	0.811864	0.999822	1.52145	2.57209	5.28542	0.0945736	1.02423	3.06555	3.13983	0.121159	-0.321361	-0.0277673	-0.905045	-0.923797	-1.36841	0.00770952	2.11297	-0.98976	-2.09134
AHNAK	K.AEGPDVAVDLPK.G_2		0.00465282	0.279751	0.469016	-1.96464	-1.72113	-1.7688	0.000177573	3.75062	-2.06933	-7.76128	0.121159	-0.321361	-0.0277673	-0.905045	-0.923797	-1.36841	0.00770952	2.11297	-0.98976	-2.09134
AHNAK	K.AEGPEVDVNLPK.A_2		0.239129	0.6567	-0.364587	-1.29727	-1.44314	-2.00835	0.00869977	2.06049	-1.76	-3.62646	0.121159	-0.321361	-0.0277673	-0.905045	-0.923797	-1.36841	0.00770952	2.11297	-0.98976	-2.09134
AHNAK	K.AKGEVDVDVPK.L_2		1.02953	-0.978671	0.165176	-2.55046	-2.47144	-3.47046	0.0119598	1.92227	-2.9028	-5.57998	0.121159	-0.321361	-0.0277673	-0.905045	-0.923797	-1.36841	0.00770952	2.11297	-0.98976	-2.09134
AHNAK	K.AKGEVDVDVPKLEGDLK.G_2		0.654412	0.040219	-0.199827	2.30091	1.00878	0.480869	0.139803	0.854483	1.09858	0.938722	0.121159	-0.321361	-0.0277673	-0.905045	-0.923797	-1.36841	0.00770952	2.11297	-0.98976	-2.09134
AHNAK	K.ANVDIS[+203.07937]APKVDT[+656.22761]NAPDLSLEGPEGK.L_3	TRUE		4.62115		10.9012	12.3782		#DIV/0!	#DIV/0!	7.01855	#DIV/0!		-0.321361		-0.905045	-0.923797		#DIV/0!	#DIV/0!	-0.593061	#DIV/0!
AHNAK	K.APDVDVNIAGPDAALK.V_2		0.350003	0.42003	-0.217018	-0.692677	-1.3122	-0.756984	0.0172132	1.76414	-1.10496	-1.9493	0.121159	-0.321361	-0.0277673	-0.905045	-0.923797	-1.36841	0.00770952	2.11297	-0.98976	-2.09134
AHNAK	K.APEVNLN[+0.98402]APDVDVHGPDWNLK.M_2		0.667532	0.447165	-0.987803	-2.13426	1.10585	0.263716	0.800504	0.0966363	-0.297195	-0.0287198	0.121159	-0.321361	-0.0277673	-0.905045	-0.923797	-1.36841	0.00770952	2.11297	-0.98976	-2.09134
AHNAK	K.APEVNLNAPDVDVHGPDWNLK.M_2		-4.07243	-2.34631	3.02541	3.74023	4.6545	4.91596	0.0619896	1.20768	5.568	6.72437	0.121159	-0.321361	-0.0277673	-0.905045	-0.923797	-1.36841	0.00770952	2.11297	-0.98976	-2.09134
AHNAK	K.APEVNLNAPDVDVHGPDWNLK.M_3		1.2145	-1.75233	0.300419	1.00754	-0.177087	-0.339589	0.815556	0.0885463	0.242758	0.0214953	0.121159	-0.321361	-0.0277673	-0.905045	-0.923797	-1.36841	0.00770952	2.11297	-0.98976	-2.09134
AHNAK	K.APNISM[+15.99492]PDVDLNLK.G_2		0.559134	0.175485	-0.17495	-1.15981	-0.80577	-1.31326	0.00790566	2.10206	-1.2795	-2.68959	0.121159	-0.321361	-0.0277673	-0.905045	-0.923797	-1.36841	0.00770952	2.11297	-0.98976	-2.09134
AHNAK	K.APNISMPDVDLNLK.G_2		0.77823	-0.645022	0.311461	-1.34194	-2.71938	-0.119899	0.147364	0.831608	-1.54196	-1.28231	0.121159	-0.321361	-0.0277673	-0.905045	-0.923797	-1.36841	0.00770952	2.11297	-0.98976	-2.09134
AHNAK	K.APSLDIK.G_1		0.628983	-0.446705	0.401775	1.43089	2.45089	2.02358	0.0158534	1.79988	1.77377	3.19257	0.121159	-0.321361	-0.0277673	-0.905045	-0.923797	-1.36841	0.00770952	2.11297	-0.98976	-2.09134
AHNAK	K.ASLGSLEGEAEAEASSPK.G_2		-0.954261	1.55182	-0.697076	0.685619	0.433493	0.195083	0.591257	0.228224	0.471236	0.107547	0.121159	-0.321361	-0.0277673	-0.905045	-0.923797	-1.36841	0.00770952	2.11297	-0.98976	-2.09134
AHNAK	K.DIDISSPEFK.I_2		1.13382	-0.790033	-0.190302	0.143064	0.980845	0.177417	0.576897	0.238902	0.382614	0.0914071	0.121159	-0.321361	-0.0277673	-0.905045	-0.923797	-1.36841	0.00770952	2.11297	-0.98976	-2.09134
AHNAK	K.FAGGLHFSGPK.V_2		1.05479	-0.996232	0.138416	-2.91032	-3.4478	-2.37867	0.0112171	1.95012	-2.97792	-5.8073	0.121159	-0.321361	-0.0277673	-0.905045	-0.923797	-1.36841	0.00770952	2.11297	-0.98976	-2.09134
AHNAK	K.FKAEAPLPSPK.L_2		0.638764	-3.77083	1.42066	-4.15529	-4.28558	-2.12284	0.169159	0.771704	-2.95077	-2.27712	0.121159	-0.321361	-0.0277673	-0.905045	-0.923797	-1.36841	0.00770952	2.11297	-0.98976	-2.09134
AHNAK	K.FSM[+15.99492]PGFK.A_1		-0.199443	1.09077	-0.534479	2.27612	2.88545	-0.0867015	0.202548	0.693472	1.57267	1.0906	0.121159	-0.321361	-0.0277673	-0.905045	-0.923797	-1.36841	0.00770952	2.11297	-0.98976	-2.09134
AHNAK	K.FSM[+15.99492]PGFKGEGPDVDVNLPK.A_2		-1.5681	4.57689		10.4922	8.11113	12.4775	0.0512324	1.29046	8.85589	11.4281	0.121159	-0.321361		-0.905045	-0.923797	-1.36841	0.0325412	1.48757	-0.965649	-1.43647
AHNAK	K.FSM[+15.99492]PGFKGEGPDVDVNLPK.A_3		0.986005	0.414926	-2.60422	-6.5513	-0.759065	-2.56736	0.229628	0.638974	-2.89148	-1.84758	0.121159	-0.321361	-0.0277673	-0.905045	-0.923797	-1.36841	0.00770952	2.11297	-0.98976	-2.09134
AHNAK	K.GAKPQGHIGVDASAPQIGGSITGPSVEVQAPDIDVQGPGSK.L_4		-0.668615	0.745076	0.463619		1.31976	-1.35406	0.873905	0.0585355	-0.197176	-0.0115418	0.121159	-0.321361	-0.0277673		-0.923797	-1.36841	0.0200393	1.69812	-1.07011	-1.81718
AHNAK	K.GDINIEGPSM[+15.99492]NIEGPDLNVEGPEGGLK.G_2		-2.96761	0.274216	1.70189	1.70435	0.7312	-0.486587	0.55413	0.256389	0.980155	0.251301	0.121159	-0.321361	-0.0277673	-0.905045	-0.923797	-1.36841	0.00770952	2.11297	-0.98976	-2.09134
AHNAK	K.GDISISGPK.V_1		-1.4206	1.63985	-0.475803	-0.469804	1.46778	1.33489	0.47636	0.322065	0.863137	0.277986	0.121159	-0.321361	-0.0277673	-0.905045	-0.923797	-1.36841	0.00770952	2.11297	-0.98976	-2.09134
AHNAK	K.GDLDIAGPNLEGDFK.G_2		-0.10351	-0.377849	1.09422	-2.49526	-5.29277	-1.07904	0.0745413	1.1276	-3.15997	-3.56319	0.121159	-0.321361	-0.0277673	-0.905045	-0.923797	-1.36841	0.00770952	2.11297	-0.98976	-2.09134
AHNAK	K.GDVDVSLPEVEGEM[+15.99492]K.V_2		-0.22485	-0.408764	1.19868	1.35922	0.290309	-0.908093	0.946854	0.023717	0.0587897	0.00139431	0.121159	-0.321361	-0.0277673	-0.905045	-0.923797	-1.36841	0.00770952	2.11297	-0.98976	-2.09134
AHNAK	K.GDVDVSLPK.L_1		0.860857	-1.02779	0.460852	-2.99044	-3.14892	-0.650645	0.0757991	1.12034	-2.36131	-2.64546	0.121159	-0.321361	-0.0277673	-0.905045	-0.923797	-1.36841	0.00770952	2.11297	-0.98976	-2.09134
AHNAK	K.GDVPSVGLEGPDVDLQGPEAK.I_2		0.766119	-1.77077	0.986353	0.757958	0.909984	1.42725	0.316584	0.499511	1.03783	0.518407	0.121159	-0.321361	-0.0277673	-0.905045	-0.923797	-1.36841	0.00770952	2.11297	-0.98976	-2.09134
AHNAK	K.GEETGIDVTLPTGEVTVPGVSGDVSLPEIATGGLEGK.M_3		-0.00376858	1.11264	-4.57706	0.224081	-0.536592	0.794696	0.501136	0.300044	1.31679	0.395096	0.121159	-0.321361	-0.0277673	-0.905045	-0.923797	-1.36841	0.00770952	2.11297	-0.98976	-2.09134
AHNAK	K.GEGPDVDVNLPK.A_2		0.835639	0.11706	-0.64563	-3.3237	-2.81386	-3.12684	0.002137	2.6702	-3.19049	-8.51924	0.121159	-0.321361	-0.0277673	-0.905045	-0.923797	-1.36841	0.00770952	2.11297	-0.98976	-2.09134
AHNAK	K.GEGPDVDVSLPK.A_2		0.317558	0.61799	-0.452077	-1.68475	-1.47438	-0.948	0.0167197	1.77677	-1.5302	-2.71882	0.121159	-0.321361	-0.0277673	-0.905045	-0.923797	-1.36841	0.00770952	2.11297	-0.98976	-2.09134
AHNAK	K.GEGPDVDVTLPK.A_2		0.491413	-0.194983	0.377265	-1.51369	-2.27388	-1.00534	0.0128105	1.89243	-1.8222	-3.44839	0.121159	-0.321361	-0.0277673	-0.905045	-0.923797	-1.36841	0.00770952	2.11297	-0.98976	-2.09134
AHNAK	K.GEGPDVHM[+15.99492]TLPK.G_2		0.789447	0.0520872	-0.393971	-1.3019	-1.67757	-2.28474	0.0131985	1.87948	-1.90392	-3.57838	0.121159	-0.321361	-0.0277673	-0.905045	-0.923797	-1.36841	0.00770952	2.11297	-0.98976	-2.09134
AHNAK	K.GEGPDVHMTLPK.G_2		0.667669	-1.06255	0.751461	-0.828701	-1.3715	0.270959	0.37478	0.426224	-0.761941	-0.324757	0.121159	-0.321361	-0.0277673	-0.905045	-0.923797	-1.36841	0.00770952	2.11297	-0.98976	-2.09134
AHNAK	K.GEGPEFDVNLSK.A_2		0.227007	0.431811	0.0195298	-1.8859	-1.75578	-2.24608	0.00031675	3.49928	-2.1887	-7.65889	0.121159	-0.321361	-0.0277673	-0.905045	-0.923797	-1.36841	0.00770952	2.11297	-0.98976	-2.09134
AHNAK	K.GEGPEVDM[+15.99492]NLPK.A_2		-0.127729	0.911	-0.302188	-0.73542	-0.192745	-1.14317	0.143325	0.843677	-0.850806	-0.717806	0.121159	-0.321361	-0.0277673	-0.905045	-0.923797	-1.36841	0.00770952	2.11297	-0.98976	-2.09134
AHNAK	K.GEGPEVDVNLPK.A_1		-3.45594	0.254414	1.73535	0.345648	-0.0260583	-0.288898	0.764358	0.116703	0.498959	0.0582302	0.121159	-0.321361	-0.0277673	-0.905045	-0.923797	-1.36841	0.00770952	2.11297	-0.98976	-2.09134
AHNAK	K.GEGPEVDVNLPK.A_2		0.162943	0.525861	-0.0464798	-0.835162	-0.750572	-1.19911	0.00618746	2.20849	-1.14239	-2.52296	0.121159	-0.321361	-0.0277673	-0.905045	-0.923797	-1.36841	0.00770952	2.11297	-0.98976	-2.09134
AHNAK	K.GEGPEVDVTLPK.A_2		0.610102	0.0754255	-0.122017	-2.26427	-2.49736	-1.7653	0.00153781	2.8131	-2.36348	-6.64869	0.121159	-0.321361	-0.0277673	-0.905045	-0.923797	-1.36841	0.00770952	2.11297	-0.98976	-2.09134
AHNAK	K.GEIDASVPELEGDLR.G_2		0.409951	0.775612	-0.995915	0.727736	0.688517	0.149749	0.466929	0.330749	0.458785	0.151742	0.121159	-0.321361	-0.0277673	-0.905045	-0.923797	-1.36841	0.00770952	2.11297	-0.98976	-2.09134
AHNAK	K.GEVDVSLANVEGDLK.G_2		0.0588003	-0.373255	0.921791	0.00802007	-0.335617	0.304978	0.645863	0.189859	-0.209985	-0.0398676	0.121159	-0.321361	-0.0277673	-0.905045	-0.923797	-1.36841	0.00770952	2.11297	-0.98976	-2.09134
AHNAK	K.GGADVSGGVSAPDISLGEGHLSVK.G_2		-0.0453898	1.1181	-1.31054	-1.55919	1.96193	-1.09917	0.912646	0.0396976	-0.15287	-0.00606858	0.121159	-0.321361	-0.0277673	-0.905045	-0.923797	-1.36841	0.00770952	2.11297	-0.98976	-2.09134
AHNAK	K.GGKPGLTIQAPQLEVSVPSANIEGLEGK.L_2		-5.86745	2.61138	-6.83096	-5.61758	-6.89163	-3.0897	0.596726	0.224225	-1.83729	-0.411966	0.121159	-0.321361	-0.0277673	-0.905045	-0.923797	-1.36841	0.00770952	2.11297	-0.98976	-2.09134
AHNAK	K.GGKPGLTIQAPQLEVSVPSANIEGLEGK.L_3		0.672693	0.592622	-1.23231	-1.57564	-1.62198	-1.386	0.069898	1.15554	-1.53887	-1.77822	0.121159	-0.321361	-0.0277673	-0.905045	-0.923797	-1.36841	0.00770952	2.11297	-0.98976	-2.09134
AHNAK	K.GGQIGLQAPGLSVSGPQGHLESGSGK.V_2		0.849485	-0.145228	-0.268669	-0.847083	-0.371557	-1.62302	0.098041	1.00859	-1.09242	-1.1018	0.121159	-0.321361	-0.0277673	-0.905045	-0.923797	-1.36841	0.00770952	2.11297	-0.98976	-2.09134
AHNAK	K.GGQIGLQAPGLSVSGPQGHLESGSGK.V_3		0.890813	0.245875	-1.01133	0.0267329	-0.560388	-1.60001	0.362681	0.440475	-0.753006	-0.33168	0.121159	-0.321361	-0.0277673	-0.905045	-0.923797	-1.36841	0.00770952	2.11297	-0.98976	-2.09134
AHNAK	K.GGVTGSPEASISGSK.G_2		0.927003	-0.264275	-0.313861	0.525884	1.11045	-0.721758	0.794003	0.100178	0.188571	0.0188907	0.121159	-0.321361	-0.0277673	-0.905045	-0.923797	-1.36841	0.00770952	2.11297	-0.98976	-2.09134
AHNAK	K.GHYEVTGSDDETGKLQGSGVSLASK.K_3		-0.0591168	-4.26728	1.84674	-0.339532	-0.878921	0.458355	0.771864	0.112459	0.573185	0.06446	0.121159	-0.321361	-0.0277673	-0.905045	-0.923797	-1.36841	0.00770952	2.11297	-0.98976	-2.09134
AHNAK	K.GKGGVTGSPEASISGSK.G_2		0.020495	-0.222994	0.89522		-5.35874	-2.27412	0.0460873	1.33642	-4.04734	-5.40893	0.121159	-0.321361	-0.0277673		-0.923797	-1.36841	0.0200393	1.69812	-1.07011	-1.81718
AHNAK	K.GKKPDIDITGPK.V_2		-3.29566	-1.7427	2.58822	-3.64768	-2.26306	1.64128	0.810496	0.0912489	-0.606441	-0.0553371	0.121159	-0.321361	-0.0277673	-0.905045	-0.923797	-1.36841	0.00770952	2.11297	-0.98976	-2.09134
AHNAK	K.GPAFN[+0.98402]M[+15.99492]ASPESDFGINLK.G_2		-0.140609	0.789274	-0.0953301	-2.34794	-1.54956	-1.21365	0.0140033	1.85377	-1.88816	-3.50022	0.121159	-0.321361	-0.0277673	-0.905045	-0.923797	-1.36841	0.00770952	2.11297	-0.98976	-2.09134
AHNAK	K.GPAFNM[+15.99492]ASPESDFGINLK.G_2		-0.648333	0.605491	0.659645	-2.6448	-1.97159	-1.46588	0.0150644	1.82205	-2.23302	-4.06868	0.121159	-0.321361	-0.0277673	-0.905045	-0.923797	-1.36841	0.00770952	2.11297	-0.98976	-2.09134
AHNAK	K.GPAFNMASPESDFGINLK.G_2		-1.53357	0.0968177	1.52128	-2.69724	-2.08951	0.743523	0.375012	0.425954	-1.37592	-0.586078	0.121159	-0.321361	-0.0277673	-0.905045	-0.923797	-1.36841	0.00770952	2.11297	-0.98976	-2.09134
AHNAK	K.GPAFNMASPESDFGINLK.G_3		0.708649	-0.149748	-0.0157486	1.40791	1.72389	-0.25081	0.308138	0.511255	0.779277	0.39841	0.121159	-0.321361	-0.0277673	-0.905045	-0.923797	-1.36841	0.00770952	2.11297	-0.98976	-2.09134
AHNAK	K.GPEVDIRDPK.V_2		0.925777	-1.1143	0.427175	-2.47517	-2.54723	-1.53201	0.0312349	1.50536	-2.26435	-3.40867	0.121159	-0.321361	-0.0277673	-0.905045	-0.923797	-1.36841	0.00770952	2.11297	-0.98976	-2.09134
AHNAK	K.GPFVEAEVPDVDLEC[+57.02146]PDAK.L_2		-0.00681822	-2.41602	1.81935	-5.81113	-5.36117	-3.02286	0.0391806	1.40693	-4.53056	-6.37417	0.121159	-0.321361	-0.0277673	-0.905045	-0.923797	-1.36841	0.00770952	2.11297	-0.98976	-2.09134
AHNAK	K.GPGVDLPSVNLSM[+15.99492]PK.V_2		1.10499	-0.157305	-0.890915	-1.32629	-2.02662	-1.98475	0.0452384	1.34449	-1.79814	-2.41759	0.121159	-0.321361	-0.0277673	-0.905045	-0.923797	-1.36841	0.00770952	2.11297	-0.98976	-2.09134
AHNAK	K.GPGVDLPSVNLSMPK.V_2		0.351158	-0.358164	0.633577	0.33944	-1.15511	0.287088	0.53752	0.269605	-0.385049	-0.103811	0.121159	-0.321361	-0.0277673	-0.905045	-0.923797	-1.36841	0.00770952	2.11297	-0.98976	-2.09134
AHNAK	K.GPHVDVSGPDIDIEGPEGK.L_2		0.411942	0.972926	-1.57096	-1.35334	-0.859244	-2.57898	0.172551	0.763084	-1.53516	-1.17145	0.121159	-0.321361	-0.0277673	-0.905045	-0.923797	-1.36841	0.00770952	2.11297	-0.98976	-2.09134
AHNAK	K.GPHVDVSGPDIDIEGPEGK.L_3		-0.1595	0.520803	0.334078	-2.4725	-2.40153	-2.95927	0.000448055	3.34867	-2.8429	-9.51992	0.121159	-0.321361	-0.0277673	-0.905045	-0.923797	-1.36841	0.00770952	2.11297	-0.98976	-2.09134
AHNAK	K.GPQITGPSLEGDLGLK.G_2		-0.213262	1.03528	-0.39862	-0.34586	-0.135885	-0.288917	0.430715	0.36581	-0.398022	-0.1456	0.121159	-0.321361	-0.0277673	-0.905045	-0.923797	-1.36841	0.00770952	2.11297	-0.98976	-2.09134
AHNAK	K.GPQVSSALNLDTSK.F_2		0.827375	-0.0199895	-0.402389	-2.27168	-3.56113	-2.12222	0.00881156	2.05495	-2.78667	-5.72647	0.121159	-0.321361	-0.0277673	-0.905045	-0.923797	-1.36841	0.00770952	2.11297	-0.98976	-2.09134
AHNAK	K.GPSLDIDTPDVNIEGPEGK.L_2		-0.0719773	0.539468	0.250111	0.66355	0.0175029	-0.300805	0.753398	0.122976	-0.112451	-0.0138288	0.121159	-0.321361	-0.0277673	-0.905045	-0.923797	-1.36841	0.00770952	2.11297	-0.98976	-2.09134
AHNAK	K.GPTVGGGLPGIGVQGLEGNLQM[+15.99492]PGIK.S_2		-0.585012	1.15857	-0.307377	-1.2671	-1.67391	-1.88211	0.0409444	1.38781	-1.69643	-2.35432	0.121159	-0.321361	-0.0277673	-0.905045	-0.923797	-1.36841	0.00770952	2.11297	-0.98976	-2.09134
AHNAK	K.GPTVGGGLPGIGVQGLEGNLQM[+15.99492]PGIK.S_3		0.0157915	0.728142	-0.161483	-2.38106	-2.69665	-3.02171	0.000919281	3.03655	-2.89396	-8.78765	0.121159	-0.321361	-0.0277673	-0.905045	-0.923797	-1.36841	0.00770952	2.11297	-0.98976	-2.09134
AHNAK	K.GPTVGGGLPGIGVQGLEGNLQMPGIK.S_2		-2.23026	0.816908	2.11226	-4.46721	-3.56963	-3.27113	0.0401437	1.39638	-4.00229	-5.58873	0.121159	-0.321361	-0.0277673	-0.905045	-0.923797	-1.36841	0.00770952	2.11297	-0.98976	-2.09134
AHNAK	K.GPTVGGGLPGIGVQGLEGNLQMPGIK.S_3		-0.797472	0.451603	0.918065	0.897821	-1.53147	-1.225	0.428022	0.368534	-0.810279	-0.298615	0.121159	-0.321361	-0.0277673	-0.905045	-0.923797	-1.36841	0.00770952	2.11297	-0.98976	-2.09134
AHNAK	K.GSEVGFHGAAPDISVK.G_2		0.151981	0.13315	0.43067	-0.682965	-0.498807	-0.593441	0.00164478	2.78389	-0.830338	-2.31157	0.121159	-0.321361	-0.0277673	-0.905045	-0.923797	-1.36841	0.00770952	2.11297	-0.98976	-2.09134
AHNAK	K.GSEVGFHGAAPDISVK.G_3		0.534172	0.0803582	-0.0141304	0.187428	0.43666	0.517036	0.410205	0.386999	0.180241	0.0697531	0.121159	-0.321361	-0.0277673	-0.905045	-0.923797	-1.36841	0.00770952	2.11297	-0.98976	-2.09134
AHNAK	K.IDVDAPDIDIHGPDAK.L_2		-0.167241	0.118791	0.75289	0.109356	0.0637077	-0.282223	0.415218	0.381724	-0.2712	-0.103523	0.121159	-0.321361	-0.0277673	-0.905045	-0.923797	-1.36841	0.00770952	2.11297	-0.98976	-2.09134
AHNAK	K.IDVDAPDIDIHGPDAK.L_3		0.297554	-0.159512	0.547534	-1.33664	-0.763175	-0.35454	0.0410431	1.38676	-1.04664	-1.45144	0.121159	-0.321361	-0.0277673	-0.905045	-0.923797	-1.36841	0.00770952	2.11297	-0.98976	-2.09134
AHNAK	K.IDVTAPDVSIEEPEGK.L_2		1.55722	-1.19227	-0.942577	-0.201386	-1.49659	0.0593391	0.741697	0.129774	-0.353668	-0.0458967	0.121159	-0.321361	-0.0277673	-0.905045	-0.923797	-1.36841	0.00770952	2.11297	-0.98976	-2.09134
AHNAK	K.IEGEM[+15.99492]QVPDVDIR.G_2		0.502251	0.019539	0.105021	-0.389053	0.563162	-0.0705067	0.61139	0.213682	-0.174403	-0.0372667	0.121159	-0.321361	-0.0277673	-0.905045	-0.923797	-1.36841	0.00770952	2.11297	-0.98976	-2.09134
AHNAK	K.IEGEMQVPDVDIR.G_2		0.731722	0.402887	-0.9111	-2.12112	-2.48579	-2.20072	0.0103355	1.98567	-2.34371	-4.65384	0.121159	-0.321361	-0.0277673	-0.905045	-0.923797	-1.36841	0.00770952	2.11297	-0.98976	-2.09134
AHNAK	K.IKGDVDVSAPK.L_2		-1.46606	-1.0774	2.05799	-2.58576	-2.0594	-1.58858	0.171633	0.765399	-1.91609	-1.46657	0.121159	-0.321361	-0.0277673	-0.905045	-0.923797	-1.36841	0.00770952	2.11297	-0.98976	-2.09134
AHNAK	K.IKGDVDVSVPEVEGK.L_2		-0.437225	1.2372	-0.544824	-4.13616	-3.3788	-5.85799	0.0082324	2.08447	-4.5427	-9.46914	0.121159	-0.321361	-0.0277673	-0.905045	-0.923797	-1.36841	0.00770952	2.11297	-0.98976	-2.09134
AHNAK	K.IKGDVDVSVPEVEGK.L_3		0.710988	-0.522427	0.321948	0.519814	-0.468181	-0.466914	0.563601	0.249028	-0.308596	-0.0768491	0.121159	-0.321361	-0.0277673	-0.905045	-0.923797	-1.36841	0.00770952	2.11297	-0.98976	-2.09134
AHNAK	K.IKGDVDVTGPK.V_2		-2.12029	-0.559841	1.99348	-3.81231	-2.39486	-3.03412	0.0876059	1.05747	-2.85154	-3.01541	0.121159	-0.321361	-0.0277673	-0.905045	-0.923797	-1.36841	0.00770952	2.11297	-0.98976	-2.09134
AHNAK	K.IKGDVPSVGLEGPDVDLQGPEAK.I_2		-1.09859	1.39567	-0.209881	-0.593107	-2.22087	-0.420535	0.298854	0.52454	-1.10724	-0.580791	0.121159	-0.321361	-0.0277673	-0.905045	-0.923797	-1.36841	0.00770952	2.11297	-0.98976	-2.09134
AHNAK	K.IKGDVPSVGLEGPDVDLQGPEAK.I_3		0.302093	0.290661	0.0803812	-0.337439	-0.126799	-1.11915	0.0724777	1.1398	-0.752174	-0.857325	0.121159	-0.321361	-0.0277673	-0.905045	-0.923797	-1.36841	0.00770952	2.11297	-0.98976	-2.09134
AHNAK	K.IPM[+15.99492]PDFDLHLK.G_2		-4.69254	-3.66286	2.8457	-0.326371	-0.932515	7.90841	0.335005	0.474949	4.05308	1.925	0.121159	-0.321361	-0.0277673	-0.905045	-0.923797	-1.36841	0.00770952	2.11297	-0.98976	-2.09134
AHNAK	K.ISIPDVDLDLK.G_2		0.274598	0.701257	-0.548264	-0.663578	-1.78681	-2.3216	0.0470002	1.3279	-1.73319	-2.30151	0.121159	-0.321361	-0.0277673	-0.905045	-0.923797	-1.36841	0.00770952	2.11297	-0.98976	-2.09134
AHNAK	K.ISIPDVDLDLKGPK.V_2		0.72561	-0.54956	0.332182	-0.706946	-0.615385	0.0165349	0.241593	0.616916	-0.604676	-0.373035	0.121159	-0.321361	-0.0277673	-0.905045	-0.923797	-1.36841	0.00770952	2.11297	-0.98976	-2.09134
AHNAK	K.ISIPDVDLDLKGPK.V_3		0.49784	0.310934	-0.31939	1.89935	2.19277	2.04301	0.00197078	2.70536	1.88192	5.09126	0.121159	-0.321361	-0.0277673	-0.905045	-0.923797	-1.36841	0.00770952	2.11297	-0.98976	-2.09134
AHNAK	K.ISIPDVGLHLK.G_2		0.947467	0.190446	-1.08118	-0.648862	-0.896441	-1.83971	0.173757	0.760059	-1.14725	-0.871977	0.121159	-0.321361	-0.0277673	-0.905045	-0.923797	-1.36841	0.00770952	2.11297	-0.98976	-2.09134
AHNAK	K.ISM[+15.99492]PDFDLHLK.G_2		0.922411	-0.971513	0.331073	-0.108164	-0.636662	-0.0343152	0.581582	0.235389	-0.353704	-0.083258	0.121159	-0.321361	-0.0277673	-0.905045	-0.923797	-1.36841	0.00770952	2.11297	-0.98976	-2.09134
AHNAK	K.ISM[+15.99492]PDIDFNLK.G_2		0.00603033	0.939055	-0.545757	-1.35103	-1.7995	-2.51956	0.0213577	1.67045	-2.02314	-3.37955	0.121159	-0.321361	-0.0277673	-0.905045	-0.923797	-1.36841	0.00770952	2.11297	-0.98976	-2.09134
AHNAK	K.ISM[+15.99492]PDIDLNLK.G_1		-2.10862	1.90851	-0.809773	-1.12229	-1.63166	-1.33654	0.437809	0.358715	-1.02687	-0.368353	0.121159	-0.321361	-0.0277673	-0.905045	-0.923797	-1.36841	0.00770952	2.11297	-0.98976	-2.09134
AHNAK	K.ISM[+15.99492]PDIDLNLK.G_2		0.230361	0.417922	0.0543856	-1.67194	-1.96215	-1.64941	0.000163588	3.78625	-1.99539	-7.55504	0.121159	-0.321361	-0.0277673	-0.905045	-0.923797	-1.36841	0.00770952	2.11297	-0.98976	-2.09134
AHNAK	K.ISM[+15.99492]PDIDLNLKGPK.V_3		0.0926659	0.850211	-0.518854	-1.44372	-1.17567	-2.2193	0.0254463	1.59437	-1.75424	-2.79691	0.121159	-0.321361	-0.0277673	-0.905045	-0.923797	-1.36841	0.00770952	2.11297	-0.98976	-2.09134
AHNAK	K.ISM[+15.99492]PDIDLNLTGPK.I_2		0.600601	-0.193963	0.184629	-0.943734	-1.08833	-2.18931	0.0243836	1.6129	-1.60422	-2.58744	0.121159	-0.321361	-0.0277673	-0.905045	-0.923797	-1.36841	0.00770952	2.11297	-0.98976	-2.09134
AHNAK	K.ISM[+15.99492]PDLDLHLK.S_2		-0.01948	0.657781	0.0153583	0.343783	0.53977	0.554096	0.320043	0.494791	0.26133	0.129304	0.121159	-0.321361	-0.0277673	-0.905045	-0.923797	-1.36841	0.00770952	2.11297	-0.98976	-2.09134
AHNAK	K.ISM[+15.99492]PDVDFNLK.G_2		0.484622	0.226331	-0.118289	-0.0687145	-0.0407742	-1.13284	0.200625	0.697615	-0.611663	-0.426705	0.121159	-0.321361	-0.0277673	-0.905045	-0.923797	-1.36841	0.00770952	2.11297	-0.98976	-2.09134
AHNAK	K.ISM[+15.99492]PDVDLHLK.G_2		0.464287	0.153028	0.038328	-0.717519	-0.605556	-1.19596	0.008763	2.05735	-1.05822	-2.17714	0.121159	-0.321361	-0.0277673	-0.905045	-0.923797	-1.36841	0.00770952	2.11297	-0.98976	-2.09134
AHNAK	K.ISM[+15.99492]PDVDLHM[+15.99492]K.G_2		0.240584	0.773253	-0.572006	1.26824	1.27272	1.24049	0.0466239	1.33139	1.11321	1.48211	0.121159	-0.321361	-0.0277673	-0.905045	-0.923797	-1.36841	0.00770952	2.11297	-0.98976	-2.09134
AHNAK	K.ISM[+15.99492]PDVDLHVK.G_2		0.277074	-1.79407	1.40452	-0.613756	-0.953285	-0.130315	0.613748	0.21201	-0.528296	-0.112004	0.121159	-0.321361	-0.0277673	-0.905045	-0.923797	-1.36841	0.00770952	2.11297	-0.98976	-2.09134
AHNAK	K.ISM[+15.99492]PDVGLNLK.A_2		0.719865	-0.215568	0.0560086	-0.866361	-0.939611	-1.41335	0.0181613	1.74085	-1.25987	-2.19326	0.121159	-0.321361	-0.0277673	-0.905045	-0.923797	-1.36841	0.00770952	2.11297	-0.98976	-2.09134
AHNAK	K.ISM[+15.99492]PDVNLNLK.G_2		-0.146342	0.734309	0.032154	3.89731	4.1314	0.941419	0.0586173	1.23197	2.78333	3.429	0.121159	-0.321361	-0.0277673	-0.905045	-0.923797	-1.36841	0.00770952	2.11297	-0.98976	-2.09134
AHNAK	K.ISM[+15.99492]PEIDLNLK.G_2		-0.183714	0.821974	-0.0615612	-1.21224	-0.4829	-0.970752	0.0475919	1.32247	-1.08086	-1.42941	0.121159	-0.321361	-0.0277673	-0.905045	-0.923797	-1.36841	0.00770952	2.11297	-0.98976	-2.09134
AHNAK	K.ISM[+15.99492]PEVDLNLK.G_2		0.693868	0.148213	-0.402085	-0.772322	-1.34095	-0.94999	0.0310771	1.50756	-1.16775	-1.76045	0.121159	-0.321361	-0.0277673	-0.905045	-0.923797	-1.36841	0.00770952	2.11297	-0.98976	-2.09134
AHNAK	K.ISM[+15.99492]QDVDLSLGSPK.L_2		0.279736	0.663098	-0.423714	-1.15407	-1.02498	-0.945975	0.0199556	1.69994	-1.21472	-2.06494	0.121159	-0.321361	-0.0277673	-0.905045	-0.923797	-1.36841	0.00770952	2.11297	-0.98976	-2.09134
AHNAK	K.ISMPDFDLHLK.G_2		-0.688163	0.892552	0.320162	0.397331	-0.414934	-0.00522627	0.742506	0.1293	-0.18246	-0.023592	0.121159	-0.321361	-0.0277673	-0.905045	-0.923797	-1.36841	0.00770952	2.11297	-0.98976	-2.09134
AHNAK	K.ISMPDIDLNLK.G_2		-0.95313	1.12199	0.164551	-1.85194	-1.21733	-1.4586	0.061176	1.21342	-1.62043	-1.96626	0.121159	-0.321361	-0.0277673	-0.905045	-0.923797	-1.36841	0.00770952	2.11297	-0.98976	-2.09134
AHNAK	K.ISMPDIDLNLTGPK.I_2		0.123555	0.492812	0.02337	-1.13375	-1.53254	-0.961289	0.00301461	2.52077	-1.42244	-3.58564	0.121159	-0.321361	-0.0277673	-0.905045	-0.923797	-1.36841	0.00770952	2.11297	-0.98976	-2.09134
AHNAK	K.ISMPDLDLNLK.G_2		-0.847339	1.07583	0.171234	-1.86822	-1.51172	-1.52262	0.0357562	1.44665	-1.76743	-2.55684	0.121159	-0.321361	-0.0277673	-0.905045	-0.923797	-1.36841	0.00770952	2.11297	-0.98976	-2.09134
AHNAK	K.ISMPDVDLHLK.G_2		-0.330704	0.782415	0.172439	-1.23854	-1.11386	-1.11994	0.0135898	1.86679	-1.3655	-2.54909	0.121159	-0.321361	-0.0277673	-0.905045	-0.923797	-1.36841	0.00770952	2.11297	-0.98976	-2.09134
AHNAK	K.ISMPDVDLNLK.G_2		-0.0271933	0.368684	0.355138	-0.425331	-0.703414	0.512758	0.324832	0.488341	-0.437538	-0.213668	0.121159	-0.321361	-0.0277673	-0.905045	-0.923797	-1.36841	0.00770952	2.11297	-0.98976	-2.09134
AHNAK	K.ISMPDVGLNLK.A_2		-0.799664	-0.384652	1.5409	1.97733	0.481726	0.876178	0.306964	0.512913	0.992883	0.509263	0.121159	-0.321361	-0.0277673	-0.905045	-0.923797	-1.36841	0.00770952	2.11297	-0.98976	-2.09134
AHNAK	K.ISMPEVDLNLK.G_2		0.614263	0.668967	-1.19924	-2.18813	-2.50574	-2.92733	0.0168059	1.77454	-2.5684	-4.55772	0.121159	-0.321361	-0.0277673	-0.905045	-0.923797	-1.36841	0.00770952	2.11297	-0.98976	-2.09134
AHNAK	K.ISMQDVDLSLGSPK.L_2		-0.815397	0.389371	0.974388	1.87696	1.03183	1.32383	0.102587	0.988909	1.22809	1.21447	0.121159	-0.321361	-0.0277673	-0.905045	-0.923797	-1.36841	0.00770952	2.11297	-0.98976	-2.09134
AHNAK	K.KPDIDITGPK.V_2		0.772331	-0.0844199	-0.206305	-0.89419	-1.13375	-0.395688	0.0620262	1.20742	-0.968412	-1.16928	0.121159	-0.321361	-0.0277673	-0.905045	-0.923797	-1.36841	0.00770952	2.11297	-0.98976	-2.09134
AHNAK	K.LDADM[+15.99492]PEVAVEGPN[+0.98402]GK.W_2		-0.572822	1.21304	-0.348948	-0.259935	0.512167	0.719224	0.739417	0.13111	0.226727	0.0297263	0.121159	-0.321361	-0.0277673	-0.905045	-0.923797	-1.36841	0.00770952	2.11297	-0.98976	-2.09134
AHNAK	K.LEGDLKGPEVDIK.G_2		-0.272336	0.461096	0.506397	-0.47238	-0.189128	-0.320978	0.102741	0.988256	-0.559214	-0.552647	0.121159	-0.321361	-0.0277673	-0.905045	-0.923797	-1.36841	0.00770952	2.11297	-0.98976	-2.09134
AHNAK	K.LEGDLTGPSVDVEVPDVELEC[+57.02146]PDAK.L_2		-0.0722584	0.531714	-0.237057		-2.7915	-2.6381	0.00281946	2.54983	-2.78893	-7.11131	0.121159	-0.321361	-0.0277673		-0.923797	-1.36841	0.0200393	1.69812	-1.07011	-1.81718
AHNAK	K.LEGDLTGPSVGVEVPDVELEC[+57.02146]PDAK.L_2		0.519068	0.330455	-0.647539	0.509981	0.249591	-1.90709	0.623489	0.205171	-0.449835	-0.0922932	0.121159	-0.321361	-0.0277673	-0.905045	-0.923797	-1.36841	0.00770952	2.11297	-0.98976	-2.09134
AHNAK	K.LEGDLTGPSVGVEVPDVELEC[+57.02146]PDAK.L_3		-0.296539	1.51013	-2.09283	-1.58239	-1.04074	-0.493095	0.530267	0.275505	-0.745665	-0.205434	0.121159	-0.321361	-0.0277673	-0.905045	-0.923797	-1.36841	0.00770952	2.11297	-0.98976	-2.09134
AHNAK	K.LEGELQAPDLELSLPAIHVEGLDIK.A_3		0.777927	0.212555	-1.02203	-1.24584	-1.33521	-1.55969	0.0640813	1.19327	-1.36973	-1.63446	0.121159	-0.321361	-0.0277673	-0.905045	-0.923797	-1.36841	0.00770952	2.11297	-0.98976	-2.09134
AHNAK	K.LEVPDM[+15.99492]NIR.G_2		0.756688	-0.509489	0.225729	1.51667	1.5455	0.770856	0.0660242	1.1803	1.12003	1.32197	0.121159	-0.321361	-0.0277673	-0.905045	-0.923797	-1.36841	0.00770952	2.11297	-0.98976	-2.09134
AHNAK	K.LKGDVDVSLPEVEGEM[+15.99492]K.V_2		0.675192	-0.525837	0.361307	-0.450209	0.453345	-0.833167	0.441959	0.354618	-0.446898	-0.158478	0.121159	-0.321361	-0.0277673	-0.905045	-0.923797	-1.36841	0.00770952	2.11297	-0.98976	-2.09134
AHNAK	K.LKGEIDASVPELEGDLR.G_2		-2.56769	0.320972	1.61371	1.14824	1.18856	1.98264	0.262073	0.581578	1.65082	0.960079	0.121159	-0.321361	-0.0277673	-0.905045	-0.923797	-1.36841	0.00770952	2.11297	-0.98976	-2.09134
AHNAK	K.LKGPQITGPSLEGDLGLK.G_2		-0.251303	1.31048	-1.15975	0.835517	1.2297	1.79863	0.162794	0.78836	1.32147	1.0418	0.121159	-0.321361	-0.0277673	-0.905045	-0.923797	-1.36841	0.00770952	2.11297	-0.98976	-2.09134
AHNAK	K.LKGPQITGPSLEGDLGLK.G_3		0.56581	0.634522	-0.993176	-1.52372	-1.47883	-2.39602	0.0374639	1.42639	-1.86857	-2.66531	0.121159	-0.321361	-0.0277673	-0.905045	-0.923797	-1.36841	0.00770952	2.11297	-0.98976	-2.09134
AHNAK	K.LKTDVDVSLPK.V_2		1.60664	-2.0488	-0.407049	3.11079	4.24735	1.21533	0.0848826	1.07118	3.1409	3.36447	0.121159	-0.321361	-0.0277673	-0.905045	-0.923797	-1.36841	0.00770952	2.11297	-0.98976	-2.09134
AHNAK	K.LNVGAPDVTLR.G_2		-0.459118	1.2113	-0.448984	-2.78223	-0.161729	-1.89322	0.145219	0.837977	-1.71346	-1.43584	0.121159	-0.321361	-0.0277673	-0.905045	-0.923797	-1.36841	0.00770952	2.11297	-0.98976	-2.09134
AHNAK	K.LPQFGISTPGSDLHVNAK.G_2		-0.380907	-0.640469	1.43442	0.690847	-0.28637	-0.515989	0.827158	0.0824113	-0.174853	-0.0144098	0.121159	-0.321361	-0.0277673	-0.905045	-0.923797	-1.36841	0.00770952	2.11297	-0.98976	-2.09134
AHNAK	K.LPQFGISTPGSDLHVNAK.G_3		0.796362	-0.369928	0.0677782	-0.499801	-0.747531	-0.346181	0.125126	0.902652	-0.695909	-0.628163	0.121159	-0.321361	-0.0277673	-0.905045	-0.923797	-1.36841	0.00770952	2.11297	-0.98976	-2.09134
AHNAK	K.LPTGQISGPEIK.G_2		0.380439	0.726009	-0.749406	-1.35094	-2.47737	-2.23042	0.018967	1.722	-2.13859	-3.68266	0.121159	-0.321361	-0.0277673	-0.905045	-0.923797	-1.36841	0.00770952	2.11297	-0.98976	-2.09134
AHNAK	K.LQVTM[+15.99492]PGIK.V_2		0.779286	0.324665	-0.870481	0.346631	0.023141	-1.2915	0.612561	0.212851	-0.385065	-0.0819614	0.121159	-0.321361	-0.0277673	-0.905045	-0.923797	-1.36841	0.00770952	2.11297	-0.98976	-2.09134
AHNAK	K.M[+15.99492]DAEVPDVNIEGPDAK.L_2		1.3443	-0.801496	-0.703938	0.219164	0.430174	-0.234172	0.804524	0.0944608	0.1921	0.018146	0.121159	-0.321361	-0.0277673	-0.905045	-0.923797	-1.36841	0.00770952	2.11297	-0.98976	-2.09134
AHNAK	K.M[+15.99492]DIDAPDVDVHGPDWHLK.M_3		-0.67179	1.51151	-0.985226	-1.39628	0.778017	1.13533	0.852594	0.0692578	0.220859	0.0152962	0.121159	-0.321361	-0.0277673	-0.905045	-0.923797	-1.36841	0.00770952	2.11297	-0.98976	-2.09134
AHNAK	K.M[+15.99492]DIDAPDVDVHGPDWHLK.M_4		0.0338377	0.86783	-0.461712	1.50458	1.15324	1.90255	0.0365097	1.43759	1.37347	1.97449	0.121159	-0.321361	-0.0277673	-0.905045	-0.923797	-1.36841	0.00770952	2.11297	-0.98976	-2.09134
AHNAK	K.M[+15.99492]DIDAPDVEVQGPDWHLK.M_3		0.463827	-0.29755	0.454058	0.648294	0.112278	-0.131354	0.993497	0.00283336	0.00296101	8.3896e-06	0.121159	-0.321361	-0.0277673	-0.905045	-0.923797	-1.36841	0.00770952	2.11297	-0.98976	-2.09134
AHNAK	K.M[+15.99492]DIDVPDVEVQGPDWHLK.M_2		-1.15481	-1.22624	2.08577	-0.826483		-1.63126	0.490188	0.309637	-1.13044	-0.350028	0.121159	-0.321361	-0.0277673	-0.905045		-1.36841	0.0216975	1.66359	-1.06074	-1.76463
AHNAK	K.M[+15.99492]DIDVPDVEVQGPDWHLK.M_3		2.07568	-2.46681	-2.78278	0.520392	0.277457	0.668151	0.381322	0.418708	1.54664	0.64759	0.121159	-0.321361	-0.0277673	-0.905045	-0.923797	-1.36841	0.00770952	2.11297	-0.98976	-2.09134
AHNAK	K.M[+15.99492]DVNVGDIDIEGPEGK.L_2		0.344793	0.935925	-1.29253	2.41884	2.4441	0.226347	0.161751	0.791153	1.70037	1.34525	0.121159	-0.321361	-0.0277673	-0.905045	-0.923797	-1.36841	0.00770952	2.11297	-0.98976	-2.09134
AHNAK	K.M[+15.99492]EGDLKAPEVDIK.G_2		0.620869	-0.89261	0.688801	0.564547	1.17103	1.21407	0.204303	0.689726	0.844195	0.582263	0.121159	-0.321361	-0.0277673	-0.905045	-0.923797	-1.36841	0.00770952	2.11297	-0.98976	-2.09134
AHNAK	K.M[+15.99492]EGDLKGPEVDIK.G_2		0.372813	0.738223	-0.80294	-0.872566	-1.44928	-1.58339	0.0521817	1.28248	-1.40444	-1.80117	0.121159	-0.321361	-0.0277673	-0.905045	-0.923797	-1.36841	0.00770952	2.11297	-0.98976	-2.09134
AHNAK	K.M[+15.99492]EGGGAEVHAQLPSLEGDLR.G_2		0.261208	-0.684656	0.966173	-0.458104	-2.45843	-1.42102	0.0958768	1.01829	-1.62676	-1.65651	0.121159	-0.321361	-0.0277673	-0.905045	-0.923797	-1.36841	0.00770952	2.11297	-0.98976	-2.09134
AHNAK	K.M[+15.99492]EGGGAEVHAQLPSLEGDLR.G_3		0.426022	-0.063175	0.325421	-0.780803	0.361857	-1.20974	0.191675	0.717435	-0.772317	-0.554088	0.121159	-0.321361	-0.0277673	-0.905045	-0.923797	-1.36841	0.00770952	2.11297	-0.98976	-2.09134
AHNAK	K.M[+15.99492]KGDVDVSLPK.V_2		0.328493	0.754794	-0.689935	-0.956881	0.384058	-0.463111	0.457905	0.339225	-0.476428	-0.161616	0.121159	-0.321361	-0.0277673	-0.905045	-0.923797	-1.36841	0.00770952	2.11297	-0.98976	-2.09134
AHNAK	K.M[+15.99492]KGDVVVSLPK.V_2		-0.0112291	0.687861	-0.0881	-0.0202367	0.154391	0.0542031	0.624554	0.20443	-0.133391	-0.0272692	0.121159	-0.321361	-0.0277673	-0.905045	-0.923797	-1.36841	0.00770952	2.11297	-0.98976	-2.09134
AHNAK	K.M[+15.99492]KGDYDVTVPK.V_2		0.408958	0.837308	-1.09685	-1.3273	-1.35511	-0.946362	0.104242	0.981955	-1.2594	-1.23667	0.121159	-0.321361	-0.0277673	-0.905045	-0.923797	-1.36841	0.00770952	2.11297	-0.98976	-2.09134
AHNAK	K.M[+15.99492]KGEVDVSLANVEGDLK.G_2		0.912739	0.238963	-1.13118	0.44277	0.769147	0.210722	0.494701	0.305657	0.467373	0.142856	0.121159	-0.321361	-0.0277673	-0.905045	-0.923797	-1.36841	0.00770952	2.11297	-0.98976	-2.09134
AHNAK	K.M[+15.99492]PDVDISVPK.I_2		0.255964	0.245738	0.203042	0.485233	0.0939385	-0.421287	0.52639	0.278692	-0.182286	-0.0508017	0.121159	-0.321361	-0.0277673	-0.905045	-0.923797	-1.36841	0.00770952	2.11297	-0.98976	-2.09134
AHNAK	K.M[+15.99492]PFLSISSPK.V_2		1.13214	-0.148716	-0.970377	-2.69003	-3.44245	-2.92089	0.00971581	2.01252	-3.02214	-6.08212	0.121159	-0.321361	-0.0277673	-0.905045	-0.923797	-1.36841	0.00770952	2.11297	-0.98976	-2.09134
AHNAK	K.M[+15.99492]PKMKMPTFSTPGAK.G_2		0.0205368	0.360529	0.23097	3.87177	2.81335	0.831009	0.0622071	1.20616	2.30136	2.77581	0.121159	-0.321361	-0.0277673	-0.905045	-0.923797	-1.36841	0.00770952	2.11297	-0.98976	-2.09134
AHNAK	K.M[+15.99492]PSLEISAPK.V_2		1.11086	-0.423305	-0.509885	0.632907	-0.373744	-0.734098	0.760553	0.118871	-0.217534	-0.0258585	0.121159	-0.321361	-0.0277673	-0.905045	-0.923797	-1.36841	0.00770952	2.11297	-0.98976	-2.09134
AHNAK	K.M[+15.99492]PTFSTPGAK.G_1		0.497817	0.859117	-1.44448	-3.58416	-2.72298	-2.67104	0.0186483	1.72936	-2.96355	-5.12504	0.121159	-0.321361	-0.0277673	-0.905045	-0.923797	-1.36841	0.00770952	2.11297	-0.98976	-2.09134
AHNAK	K.M[+15.99492]PTFSTPGAK.G_2		1.17402	-0.507655	-0.567067	-1.15074	-1.12658	-0.945004	0.126165	0.899062	-1.10721	-0.995447	0.121159	-0.321361	-0.0277673	-0.905045	-0.923797	-1.36841	0.00770952	2.11297	-0.98976	-2.09134
AHNAK	K.M[+15.99492]YFPDVEFDIK.S_2		0.06416	0.814562	-0.426424	0.55268	0.39545	-0.629273	0.935602	0.028909	-0.0444806	-0.00128589	0.121159	-0.321361	-0.0277673	-0.905045	-0.923797	-1.36841	0.00770952	2.11297	-0.98976	-2.09134
AHNAK	K.MDAEVPDVNIEGPDAK.L_2		-1.64395	0.68897	1.08151		-0.12032	0.672401	0.850232	0.0704626	0.233864	0.0164787	0.121159	-0.321361	-0.0277673		-0.923797	-1.36841	0.0200393	1.69812	-1.07011	-1.81718
AHNAK	K.MDVNVGDIDIEGPEGK.L_2		-0.434457	-0.775594	1.53684	3.62975	2.69397	2.9573	0.0181042	1.74222	2.98475	5.20009	0.121159	-0.321361	-0.0277673	-0.905045	-0.923797	-1.36841	0.00770952	2.11297	-0.98976	-2.09134
AHNAK	K.MKGDVDVSLPK.V_2		1.00324	0.070207	-0.984616	-1.66677	-1.51357	-2.06613	0.0408531	1.38877	-1.77843	-2.46984	0.121159	-0.321361	-0.0277673	-0.905045	-0.923797	-1.36841	0.00770952	2.11297	-0.98976	-2.09134
AHNAK	K.MPDVDISVPK.I_2		0.401973	0.132703	0.1197	-1.02297	-0.763668	0.193265	0.120733	0.918175	-0.749249	-0.687941	0.121159	-0.321361	-0.0277673	-0.905045	-0.923797	-1.36841	0.00770952	2.11297	-0.98976	-2.09134
AHNAK	K.MPEMSIKPQK.I_2		0.58924	0.0354688	-0.0303564	0.248395	0.871378	0.254077	0.413803	0.383206	0.259833	0.0995694	0.121159	-0.321361	-0.0277673	-0.905045	-0.923797	-1.36841	0.00770952	2.11297	-0.98976	-2.09134
AHNAK	K.MPFLSISSPK.V_2		-0.993499	-0.427787	1.64249	1.78005	1.1552	2.0442	0.133206	0.875478	1.58608	1.38858	0.121159	-0.321361	-0.0277673	-0.905045	-0.923797	-1.36841	0.00770952	2.11297	-0.98976	-2.09134
AHNAK	K.MPKFSMPGFKGEGPEVDM[+15.99492]NLPK.A_3			4.38884		20.8512	25.8679	27.7338	#DIV/0!	#DIV/0!	20.4288	#DIV/0!		-0.321361		-0.905045	-0.923797	-1.36841	#DIV/0!	#DIV/0!	-0.744389	#DIV/0!
AHNAK	K.MPSLEISAPK.V_1		0.629851	0.962092	-2.89662	1.28134	-0.373119	1.69714	0.400608	0.397281	1.30335	0.517795	0.121159	-0.321361	-0.0277673	-0.905045	-0.923797	-1.36841	0.00770952	2.11297	-0.98976	-2.09134
AHNAK	K.MPSLEISAPK.V_2		0.201596	-0.39002	0.841034	0.713972	0.675311	0.318783	0.403613	0.394034	0.351819	0.138629	0.121159	-0.321361	-0.0277673	-0.905045	-0.923797	-1.36841	0.00770952	2.11297	-0.98976	-2.09134
AHNAK	K.MSLPDVDLDLK.G_2		-1.52104	0.195317	1.48788	0.941535	0.636082	0.868907	0.433918	0.362592	0.761456	0.276098	0.121159	-0.321361	-0.0277673	-0.905045	-0.923797	-1.36841	0.00770952	2.11297	-0.98976	-2.09134
AHNAK	K.SEDGVEGDLGETQSR.T_2		0.348967	0.521856	-0.367935	0.0105352	0.339172	-0.0797049	0.809	0.0920516	-0.0776285	-0.00714582	0.121159	-0.321361	-0.0277673	-0.905045	-0.923797	-1.36841	0.00770952	2.11297	-0.98976	-2.09134
AHNAK	K.SPQISM[+15.99492]SDIDLNLK.G_2		0.662939	-0.216059	0.13816	0.77972	0.309717	-0.357276	0.91208	0.0399672	0.0490403	0.00196	0.121159	-0.321361	-0.0277673	-0.905045	-0.923797	-1.36841	0.00770952	2.11297	-0.98976	-2.09134
AHNAK	K.SPSLDVTVPEAELN[+0.98402]LETPEISVGGK.G_2		-0.648138	1.52574	-6.23876	-1.33337	-0.320259	-2.40557	0.864723	0.0631229	0.433986	0.0273945	0.121159	-0.321361	-0.0277673	-0.905045	-0.923797	-1.36841	0.00770952	2.11297	-0.98976	-2.09134
AHNAK	K.SPSLDVTVPEAELN[+0.98402]LETPEISVGGK.G_3		-0.283994	1.43232	-1.71792	-0.414274	-0.612731	-1.99621	0.474676	0.323603	-0.817874	-0.264666	0.121159	-0.321361	-0.0277673	-0.905045	-0.923797	-1.36841	0.00770952	2.11297	-0.98976	-2.09134
AHNAK	K.SPSLDVTVPEAELNLETPEISVGGK.G_2		-1.17084	1.87761	-2.60644	-1.53499	-2.17293	-6.25656	0.246852	0.607563	-2.68827	-1.63329	0.121159	-0.321361	-0.0277673	-0.905045	-0.923797	-1.36841	0.00770952	2.11297	-0.98976	-2.09134
AHNAK	K.SPSLDVTVPEAELNLETPEISVGGK.G_3		0.740128	0.64771	-2.82498	-1.0528	-1.08282	-2.83557	0.420321	0.376419	-1.17801	-0.443427	0.121159	-0.321361	-0.0277673	-0.905045	-0.923797	-1.36841	0.00770952	2.11297	-0.98976	-2.09134
AHNAK	K.SSGC[+57.02146]DVNLPGVNVK.L_2		0.923865	-0.262662	-0.267882	-0.409485	0.739666	-1.25377	0.564931	0.248005	-0.438971	-0.108867	0.121159	-0.321361	-0.0277673	-0.905045	-0.923797	-1.36841	0.00770952	2.11297	-0.98976	-2.09134
AHNAK	K.SSKASLGSLEGEAEAEASSPK.G_2		1.48838	4.47458		-2.83679	-2.31209	-6.09631	0.0378208	1.42227	-6.72988	-9.5717	0.121159	-0.321361		-0.905045	-0.923797	-1.36841	0.0325412	1.48757	-0.965649	-1.43647
AHNAK	K.TPEMIIQKPK.I_2		0.509692	-0.85743	0.798477	-2.89355	-3.01751	-0.297759	0.0958623	1.01835	-2.21985	-2.26059	0.121159	-0.321361	-0.0277673	-0.905045	-0.923797	-1.36841	0.00770952	2.11297	-0.98976	-2.09134
AHNAK	K.TPSFGISAPQVSIPDVN[+0.98402]VNLK.G_2		0.765693	0.159211	-0.62859	-0.802289	-0.247704	-0.483272	0.233057	0.632538	-0.60986	-0.38576	0.121159	-0.321361	-0.0277673	-0.905045	-0.923797	-1.36841	0.00770952	2.11297	-0.98976	-2.09134
AHNAK	K.TPSFGISAPQVSIPDVNVNLK.G_2		-0.90918	1.06415	0.189927	-1.38077	-1.80671	-2.98866	0.0435944	1.36057	-2.17368	-2.95744	0.121159	-0.321361	-0.0277673	-0.905045	-0.923797	-1.36841	0.00770952	2.11297	-0.98976	-2.09134
AHNAK	K.TPSFGISAPQVSIPDVNVNLK.G_3		0.0907086	0.889897	-0.70592	-1.26127	-0.847009	-1.53422	0.0600224	1.22169	-1.30573	-1.59519	0.121159	-0.321361	-0.0277673	-0.905045	-0.923797	-1.36841	0.00770952	2.11297	-0.98976	-2.09134
AHNAK	K.VDIDAPDVDVHGPDWHLK.M_2		1.20569	-1.23317	0.022993	0.215843	0.400386	0.226542	0.709841	0.148839	0.282419	0.0420348	0.121159	-0.321361	-0.0277673	-0.905045	-0.923797	-1.36841	0.00770952	2.11297	-0.98976	-2.09134
AHNAK	K.VDIDAPDVDVHGPDWHLK.M_3		0.166788	-0.812895	1.13276	-0.630536	-1.05367	-0.294785	0.244605	0.611536	-0.821882	-0.50261	0.121159	-0.321361	-0.0277673	-0.905045	-0.923797	-1.36841	0.00770952	2.11297	-0.98976	-2.09134
AHNAK	K.VDIDAPDVDVHGPDWHLK.M_4		0.358277	-0.790116	0.936262	-0.83839	-0.8017	0.338362	0.398553	0.399514	-0.602051	-0.240528	0.121159	-0.321361	-0.0277673	-0.905045	-0.923797	-1.36841	0.00770952	2.11297	-0.98976	-2.09134
AHNAK	K.VDIDAPDVEVHDPDWHLK.M_2		-0.269716	0.122174	0.824408	0.141886	0.523793	-0.745245	0.636434	0.196247	-0.252144	-0.0494824	0.121159	-0.321361	-0.0277673	-0.905045	-0.923797	-1.36841	0.00770952	2.11297	-0.98976	-2.09134
AHNAK	K.VDIDAPDVEVHDPDWHLK.M_3		0.434837	0.337242	-0.176518	-1.71793	-1.39027	-3.53887	0.025463	1.59409	-2.41421	-3.84847	0.121159	-0.321361	-0.0277673	-0.905045	-0.923797	-1.36841	0.00770952	2.11297	-0.98976	-2.09134
AHNAK	K.VDIDAPDVEVHDPDWHLK.M_4		0.707951	0.527362	-1.26645	-0.976356	-0.858584	-1.83843	0.158699	0.799427	-1.21408	-0.970567	0.121159	-0.321361	-0.0277673	-0.905045	-0.923797	-1.36841	0.00770952	2.11297	-0.98976	-2.09134
AHNAK	K.VDIDAPDVSIEGPDAK.L_2		0.233185	0.456538	-0.0694306	1.84633	0.439302	0.370999	0.249591	0.60277	0.67878	0.409148	0.121159	-0.321361	-0.0277673	-0.905045	-0.923797	-1.36841	0.00770952	2.11297	-0.98976	-2.09134
AHNAK	K.VDIDTPDIDIHGPEGK.L_3		0.921025	-0.678518	0.125344	-0.748591	-0.761698	-1.60743	0.0987529	1.00545	-1.16186	-1.16819	0.121159	-0.321361	-0.0277673	-0.905045	-0.923797	-1.36841	0.00770952	2.11297	-0.98976	-2.09134
AHNAK	K.VDIDVPDVDVQGPDWHLK.M_2		0.671003	0.488534	-0.991253	1.05084	0.986508	-1.07881	0.778455	0.108766	0.263417	0.0286509	0.121159	-0.321361	-0.0277673	-0.905045	-0.923797	-1.36841	0.00770952	2.11297	-0.98976	-2.09134
AHNAK	K.VDIDVPDVDVQGPDWHLK.M_3		0.44198	0.0567441	0.1582	0.51057	0.348401	-0.541379	0.760602	0.118842	-0.113111	-0.0134424	0.121159	-0.321361	-0.0277673	-0.905045	-0.923797	-1.36841	0.00770952	2.11297	-0.98976	-2.09134
AHNAK	K.VDIDVPDVNIEGPDAK.L_2		0.530618	0.220722	-0.145776	-1.1107	-1.05208	-1.4413	0.00365119	2.43757	-1.40322	-3.42043	0.121159	-0.321361	-0.0277673	-0.905045	-0.923797	-1.36841	0.00770952	2.11297	-0.98976	-2.09134
AHNAK	K.VDIDVPDVNIEGPEGK.L_2		0.491724	0.330384	-0.242402	-0.968826	-0.973825	-1.29323	0.00677184	2.16929	-1.27186	-2.75904	0.121159	-0.321361	-0.0277673	-0.905045	-0.923797	-1.36841	0.00770952	2.11297	-0.98976	-2.09134
AHNAK	K.VDIDVPDVNLEAPEGK.L_2		-0.746141	1.16921	-0.0637851	-0.618629	-1.34333	-1.92367	0.104368	0.981431	-1.41497	-1.38869	0.121159	-0.321361	-0.0277673	-0.905045	-0.923797	-1.36841	0.00770952	2.11297	-0.98976	-2.09134
AHNAK	K.VDIDVPDVNVQGPDWHLK.M_2		0.632016	-0.980999	0.761926	0.266596	0.966777	-0.335638	0.822606	0.0848079	0.161597	0.0137047	0.121159	-0.321361	-0.0277673	-0.905045	-0.923797	-1.36841	0.00770952	2.11297	-0.98976	-2.09134
AHNAK	K.VDIDVPDVNVQGPDWHLK.M_3		-0.161058	-0.570572	1.26284	3.6744	3.78598	2.71007	0.00789245	2.10279	3.21308	6.75642	0.121159	-0.321361	-0.0277673	-0.905045	-0.923797	-1.36841	0.00770952	2.11297	-0.98976	-2.09134
AHNAK	K.VDIEAPDVSLEGPEGK.L_2		-0.100346	0.853942	-0.199314	-1.23519	-1.12777	-1.10249	0.0166617	1.77828	-1.33991	-2.38274	0.121159	-0.321361	-0.0277673	-0.905045	-0.923797	-1.36841	0.00770952	2.11297	-0.98976	-2.09134
AHNAK	K.VDIEGPDVNIEGPEGK.L_2		0.141762	0.732002	-0.380326	-1.32659	-1.18169	-0.730454	0.0277808	1.55626	-1.24405	-1.93607	0.121159	-0.321361	-0.0277673	-0.905045	-0.923797	-1.36841	0.00770952	2.11297	-0.98976	-2.09134
AHNAK	K.VDINAPDVDVHGPDWHLK.M_2		1.4032	-1.05336	-0.608186	-3.2147	-2.06008	-1.23849	0.0928299	1.03231	-2.08497	-2.15234	0.121159	-0.321361	-0.0277673	-0.905045	-0.923797	-1.36841	0.00770952	2.11297	-0.98976	-2.09134
AHNAK	K.VDINAPDVDVHGPDWHLK.M_3		0.875114	-0.380279	-0.0679193	1.27895	0.712287	-0.5386	0.629883	0.20074	0.341908	0.0686347	0.121159	-0.321361	-0.0277673	-0.905045	-0.923797	-1.36841	0.00770952	2.11297	-0.98976	-2.09134
AHNAK	K.VDINAPDVDVHGPDWHLK.M_4		1.27274	-3.10734	0.630012	-0.733576	-1.76563	-1.46356	0.547096	0.261936	-0.919393	-0.240822	0.121159	-0.321361	-0.0277673	-0.905045	-0.923797	-1.36841	0.00770952	2.11297	-0.98976	-2.09134
AHNAK	K.VDINAPDVDVQGPDWHLK.M_2		-0.847713	0.950494	0.378948	-2.07574	-0.856245	-1.7715	0.0551832	1.25819	-1.72841	-2.17467	0.121159	-0.321361	-0.0277673	-0.905045	-0.923797	-1.36841	0.00770952	2.11297	-0.98976	-2.09134
AHNAK	K.VDINAPDVDVQGPDWHLK.M_3		0.700882	-0.912951	0.609765	0.800046	0.73202	-0.889665	0.91979	0.0363111	0.0815684	0.00296184	0.121159	-0.321361	-0.0277673	-0.905045	-0.923797	-1.36841	0.00770952	2.11297	-0.98976	-2.09134
AHNAK	K.VDINAPDVDVR.G_2		0.297584	0.409953	-0.112438	0.994159	1.04803	0.406428	0.0760377	1.11897	0.61784	0.691345	0.121159	-0.321361	-0.0277673	-0.905045	-0.923797	-1.36841	0.00770952	2.11297	-0.98976	-2.09134
AHNAK	K.VDINAPDVEVHGPDWHLK.M_2		0.89094	-0.347825	-0.188554	1.17905	5.62268	0.38686	0.245476	0.609991	2.27801	1.38956	0.121159	-0.321361	-0.0277673	-0.905045	-0.923797	-1.36841	0.00770952	2.11297	-0.98976	-2.09134
AHNAK	K.VDINAPDVEVHGPDWHLK.M_3		0.802652	-0.864515	0.442418	0.866821	1.35276	0.873045	0.164143	0.784779	0.904023	0.709458	0.121159	-0.321361	-0.0277673	-0.905045	-0.923797	-1.36841	0.00770952	2.11297	-0.98976	-2.09134
AHNAK	K.VDINAPDVEVHGPDWHLK.M_4		0.0290472	-1.15374	1.40291	1.75776	1.95564	1.50198	0.093337	1.02995	1.64573	1.69501	0.121159	-0.321361	-0.0277673	-0.905045	-0.923797	-1.36841	0.00770952	2.11297	-0.98976	-2.09134
AHNAK	K.VDINAPDVEVQGK.V_2		0.0829477	0.0973382	0.516409	1.16147	0.819451	0.311369	0.135372	0.86847	0.531864	0.461908	0.121159	-0.321361	-0.0277673	-0.905045	-0.923797	-1.36841	0.00770952	2.11297	-0.98976	-2.09134
AHNAK	K.VDINAPDVGVQGPDWHLK.M_2		0.822907	-0.553446	0.189033	1.06819	0.25024	0.347055	0.443893	0.352722	0.402331	0.141911	0.121159	-0.321361	-0.0277673	-0.905045	-0.923797	-1.36841	0.00770952	2.11297	-0.98976	-2.09134
AHNAK	K.VDINAPDVGVQGPDWHLK.M_3		1.12558	-0.804582	-0.14281	-0.461814	1.63542	-1.15477	0.960657	0.0174318	-0.0531197	-0.000925972	0.121159	-0.321361	-0.0277673	-0.905045	-0.923797	-1.36841	0.00770952	2.11297	-0.98976	-2.09134
AHNAK	K.VDINTPDVDVHGPDWHLK.M_2		-4.26239	1.0021	1.18568	1.87934	-1.42784	-3.15913	0.931857	0.0306507	-0.211008	-0.00646755	0.121159	-0.321361	-0.0277673	-0.905045	-0.923797	-1.36841	0.00770952	2.11297	-0.98976	-2.09134
AHNAK	K.VDINTPDVDVHGPDWHLK.M_3		0.799621	-0.611049	0.259526	2.35823	1.39657	1.34589	0.0421796	1.3749	1.55086	2.13228	0.121159	-0.321361	-0.0277673	-0.905045	-0.923797	-1.36841	0.00770952	2.11297	-0.98976	-2.09134
AHNAK	K.VDISAPDVDVHGPDWHLK.M_2		0.43375	-0.586901	0.705929	-0.465479	-0.218385	0.278985	0.517517	0.286076	-0.319219	-0.0913208	0.121159	-0.321361	-0.0277673	-0.905045	-0.923797	-1.36841	0.00770952	2.11297	-0.98976	-2.09134
AHNAK	K.VDISAPDVDVHGPDWHLK.M_3		-0.260865	-1.98437	1.82438	-0.0049909	0.256036	1.52472	0.574167	0.240962	0.732207	0.176434	0.121159	-0.321361	-0.0277673	-0.905045	-0.923797	-1.36841	0.00770952	2.11297	-0.98976	-2.09134
AHNAK	K.VDISAPDVDVHGPDWHLK.M_4		0.885757	-1.4731	0.689227	-1.36515	-2.53749	-2.68856	0.0611239	1.21379	-2.23103	-2.708	0.121159	-0.321361	-0.0277673	-0.905045	-0.923797	-1.36841	0.00770952	2.11297	-0.98976	-2.09134
AHNAK	K.VDTNAPDLSLEGPEGK.L_2		-0.112158	0.520238	0.315254	-1.60788	-1.34094	-0.851759	0.0064637	2.18952	-1.50797	-3.30173	0.121159	-0.321361	-0.0277673	-0.905045	-0.923797	-1.36841	0.00770952	2.11297	-0.98976	-2.09134
AHNAK	K.VDVDVPDVNIEGPDAK.L_2		-0.0333256	0.631761	0.0621905	-0.933677	-1.3566	-1.72985	0.00730378	2.13645	-1.56025	-3.3334	0.121159	-0.321361	-0.0277673	-0.905045	-0.923797	-1.36841	0.00770952	2.11297	-0.98976	-2.09134
AHNAK	K.VDVEC[+57.02146]PDVNIEGPEGK.W_2		-3.69625	-1.13631	2.39108	-3.12362	-3.85284	-0.55986	0.449391	0.347375	-1.69828	-0.58994	0.121159	-0.321361	-0.0277673	-0.905045	-0.923797	-1.36841	0.00770952	2.11297	-0.98976	-2.09134
AHNAK	K.VDVEGPDVNIEGPEGK.L_2		0.887933	0.0803276	-0.690315	-1.60038	-1.94578	-1.11714	0.0329821	1.48172	-1.64708	-2.44052	0.121159	-0.321361	-0.0277673	-0.905045	-0.923797	-1.36841	0.00770952	2.11297	-0.98976	-2.09134
AHNAK	K.VDVEVPDVSLEGPEGK.L_2		0.463474	0.346427	-0.202622	-0.233411	-0.654172	-1.8055	0.0984859	1.00663	-1.10012	-1.10741	0.121159	-0.321361	-0.0277673	-0.905045	-0.923797	-1.36841	0.00770952	2.11297	-0.98976	-2.09134
AHNAK	K.VDVNAPDVQAPDWHLK.M_2		1.17206	-1.02402	-0.0568673	1.90913	1.14687	-0.599265	0.464981	0.332565	0.78852	0.262234	0.121159	-0.321361	-0.0277673	-0.905045	-0.923797	-1.36841	0.00770952	2.11297	-0.98976	-2.09134
AHNAK	K.VDVNAPDVQAPDWHLK.M_3		0.730097	-1.19934	0.748076	-0.447827	-0.994885	-0.917346	0.258508	0.587527	-0.879629	-0.516806	0.121159	-0.321361	-0.0277673	-0.905045	-0.923797	-1.36841	0.00770952	2.11297	-0.98976	-2.09134
AHNAK	K.VDVSAPDVEAHGPEWNLK.M_2		1.15612	-1.99553	0.496391	2.19827	0.843409	0.261206	0.338199	0.470828	1.2153	0.572197	0.121159	-0.321361	-0.0277673	-0.905045	-0.923797	-1.36841	0.00770952	2.11297	-0.98976	-2.09134
AHNAK	K.VDVSAPDVEAHGPEWNLK.M_3		-0.308739	-0.514776	1.30796	2.29584	1.30868	1.20696	0.0986842	1.00575	1.44234	1.45064	0.121159	-0.321361	-0.0277673	-0.905045	-0.923797	-1.36841	0.00770952	2.11297	-0.98976	-2.09134
AHNAK	K.VDVSAPDVEM[+15.99492]QGPDWNLK.M_2		1.35248	-0.982806	-0.539568	-0.636854	-1.78276	-0.813169	0.270844	0.56728	-1.02096	-0.579173	0.121159	-0.321361	-0.0277673	-0.905045	-0.923797	-1.36841	0.00770952	2.11297	-0.98976	-2.09134
AHNAK	K.VEAPSLDVHM[+15.99492]DSPDIN[+0.98402]IEGPDVK.I_2		-4.55595	-0.184138	2.08612	-4.97472	-3.61007	1.54328	0.626859	0.20283	-1.46252	-0.296642	0.121159	-0.321361	-0.0277673	-0.905045	-0.923797	-1.36841	0.00770952	2.11297	-0.98976	-2.09134
AHNAK	K.VEAPSLDVHM[+15.99492]DSPDINIEGPDVK.I_2		0.850105	-0.136109	-0.864689	1.38995	6.58788		0.142142	0.847278	4.03915	3.42228	0.121159	-0.321361	-0.0277673	-0.905045	-0.923797		0.0154651	1.81065	-0.838432	-1.5181
AHNAK	K.VEAPSLDVHM[+15.99492]DSPDINIEGPDVK.I_3		1.70014	-3.52614	-0.226641	0.587309	1.06525	-1.43857	0.68111	0.166783	0.755543	0.126011	0.121159	-0.321361	-0.0277673	-0.905045	-0.923797	-1.36841	0.00770952	2.11297	-0.98976	-2.09134
AHNAK	K.VEGDLKGPEADIK.G_2		1.31952	-0.318088	-1.35088	-1.20732	-0.591698	-1.83444	0.27022	0.568283	-1.09467	-0.622083	0.121159	-0.321361	-0.0277673	-0.905045	-0.923797	-1.36841	0.00770952	2.11297	-0.98976	-2.09134
AHNAK	K.VEGDLKGPEIDIK.G_2		-0.175776	0.417502	0.459806	-3.1109	-3.12315	-1.42416	0.00972747	2.012	-2.78658	-5.60661	0.121159	-0.321361	-0.0277673	-0.905045	-0.923797	-1.36841	0.00770952	2.11297	-0.98976	-2.09134
AHNAK	K.VEGDLKGPEVDIK.G_2		0.412642	0.180929	0.065419	-1.78261	-1.28753	-0.820244	0.00687184	2.16293	-1.51646	-3.27999	0.121159	-0.321361	-0.0277673	-0.905045	-0.923797	-1.36841	0.00770952	2.11297	-0.98976	-2.09134
AHNAK	K.VEGDLKGPEVDIR.G_2		1.68282	-1.13623	-1.43919	-0.829424	0.346624	0.123214	0.874718	0.0581318	0.177671	0.0103283	0.121159	-0.321361	-0.0277673	-0.905045	-0.923797	-1.36841	0.00770952	2.11297	-0.98976	-2.09134
AHNAK	K.VEGDM[+15.99492]QVPDLDIK.G_2		0.110574	0.859107	-0.573076	-0.792107	-1.74573	-2.19604	0.0431192	1.36533	-1.71016	-2.33494	0.121159	-0.321361	-0.0277673	-0.905045	-0.923797	-1.36841	0.00770952	2.11297	-0.98976	-2.09134
AHNAK	K.VEGEMKVPDVEIK.G_2		0.0808365	0.384427	0.274039	-0.772636	-2.48694	-1.22327	0.0287558	1.54127	-1.74072	-2.68292	0.121159	-0.321361	-0.0277673	-0.905045	-0.923797	-1.36841	0.00770952	2.11297	-0.98976	-2.09134
AHNAK	K.VESDLKGPEVDIEGPEGK.L_2		0.131394	0.496652	0.0561909	-2.23665	-0.438849	-1.51611	0.0395145	1.40324	-1.62528	-2.28067	0.121159	-0.321361	-0.0277673	-0.905045	-0.923797	-1.36841	0.00770952	2.11297	-0.98976	-2.09134
AHNAK	K.VESDLKGPEVDIEGPEGK.L_3		1.15645	-0.759498	-0.259717	-1.58167	-0.968265	-1.28892	0.0919251	1.03657	-1.32536	-1.37382	0.121159	-0.321361	-0.0277673	-0.905045	-0.923797	-1.36841	0.00770952	2.11297	-0.98976	-2.09134
AHNAK	K.VESEIKVPDVELK.S_2		0.85479	0.484676	-1.49544	-0.144435	-0.366477	-1.83032	0.464214	0.333282	-0.728419	-0.242769	0.121159	-0.321361	-0.0277673	-0.905045	-0.923797	-1.36841	0.00770952	2.11297	-0.98976	-2.09134
AHNAK	K.VGIDTPDIDIHGPEGK.L_2		1.13918	-0.736957	-0.240912	-0.686197	-4.92754	-3.31616	0.0893862	1.04873	-3.0304	-3.17807	0.121159	-0.321361	-0.0277673	-0.905045	-0.923797	-1.36841	0.00770952	2.11297	-0.98976	-2.09134
AHNAK	K.VGVEVPDVNIEGPEGK.L_2		1.035	-0.378703	-0.37661	-0.285765	-2.09297	-2.31069	0.105917	0.975034	-1.65637	-1.61502	0.121159	-0.321361	-0.0277673	-0.905045	-0.923797	-1.36841	0.00770952	2.11297	-0.98976	-2.09134
AHNAK	K.VHAPGLN[+0.98402]LSGVGGK.M_2		1.36986	-0.675883	-0.896392	4.39413	4.46053	2.91986	0.0104997	1.97882	3.99231	7.90009	0.121159	-0.321361	-0.0277673	-0.905045	-0.923797	-1.36841	0.00770952	2.11297	-0.98976	-2.09134
AHNAK	K.VHAPGLNLSGVGGK.M_2		-0.87323	0.837421	0.542842	12.0075	12.5397	7.2772	0.00399864	2.39809	10.4391	25.034	0.121159	-0.321361	-0.0277673	-0.905045	-0.923797	-1.36841	0.00770952	2.11297	-0.98976	-2.09134
AHNAK	K.VKGDADVSVPK.L_2		-0.45115	-0.288503	1.25585	-2.60309	-2.31096	-2.04172	0.0117979	1.92819	-2.49066	-4.80247	0.121159	-0.321361	-0.0277673	-0.905045	-0.923797	-1.36841	0.00770952	2.11297	-0.98976	-2.09134
AHNAK	K.VKGDLDIAGPNLEGDFK.G_2		1.33842	-0.695531	-0.796515	0.387856	-0.159397	-0.702414	0.895515	0.0479271	-0.106775	-0.00511742	0.121159	-0.321361	-0.0277673	-0.905045	-0.923797	-1.36841	0.00770952	2.11297	-0.98976	-2.09134
AHNAK	K.VKGDLDIAGPNLEGDFK.G_3		1.57685	-1.653	-0.637299	-0.859571	-1.28715	-1.09947	0.429506	0.367031	-0.844246	-0.309864	0.121159	-0.321361	-0.0277673	-0.905045	-0.923797	-1.36841	0.00770952	2.11297	-0.98976	-2.09134
AHNAK	K.VKGDM[+15.99492]DISLPK.V_2		0.761902	0.397715	-0.978134	0.152925	0.092193	-0.721728	0.73326	0.134742	-0.219364	-0.0295576	0.121159	-0.321361	-0.0277673	-0.905045	-0.923797	-1.36841	0.00770952	2.11297	-0.98976	-2.09134
AHNAK	K.VKGDM[+15.99492]DVSLPK.V_2		0.197224	0.824193	-0.61673	-2.51984	-1.69192	-2.03991	0.00995191	2.00209	-2.21878	-4.44221	0.121159	-0.321361	-0.0277673	-0.905045	-0.923797	-1.36841	0.00770952	2.11297	-0.98976	-2.09134
AHNAK	K.VKGDM[+15.99492]DVSVPK.V_2		-3.18061	-5.12219	2.80031	-5.6789	-3.3295	-1.01424	0.611409	0.213668	-1.50672	-0.321937	0.121159	-0.321361	-0.0277673	-0.905045	-0.923797	-1.36841	0.00770952	2.11297	-0.98976	-2.09134
AHNAK	K.VKGDVDISLPK.V_2		0.0865878	-0.856067	1.19833	-1.85057	-1.5897	0.127594	0.220078	0.657424	-1.24717	-0.819922	0.121159	-0.321361	-0.0277673	-0.905045	-0.923797	-1.36841	0.00770952	2.11297	-0.98976	-2.09134
AHNAK	K.VKGDVDVSLPK.L_2		1.30309	-0.745697	-0.623658	0.151198	-0.774327	-1.3063	0.474911	0.323387	-0.621053	-0.200841	0.121159	-0.321361	-0.0277673	-0.905045	-0.923797	-1.36841	0.00770952	2.11297	-0.98976	-2.09134
AHNAK	K.VKGDVDVSVPK.V_2		0.239718	0.739473	-0.506182	-1.78503	-1.07397	-2.37138	0.0218233	1.66108	-1.90113	-3.15792	0.121159	-0.321361	-0.0277673	-0.905045	-0.923797	-1.36841	0.00770952	2.11297	-0.98976	-2.09134
AHNAK	K.VKGDVDVTLPK.V_2		-0.205639	-0.684821	1.31463	-1.74907	-1.40768	-3.03277	0.0474753	1.32353	-2.20456	-2.91781	0.121159	-0.321361	-0.0277673	-0.905045	-0.923797	-1.36841	0.00770952	2.11297	-0.98976	-2.09134
AHNAK	K.VKGEYDM[+15.99492]TVPK.L_2		-4.86107	-4.63436	2.92715	-1.52392	-0.75619	2.19328	0.483215	0.315859	2.16049	0.68241	0.121159	-0.321361	-0.0277673	-0.905045	-0.923797	-1.36841	0.00770952	2.11297	-0.98976	-2.09134
AHNAK	K.VKGEYDVTVPK.L_2		-0.58613	1.44846	-0.856785	-1.00531	0.41743	0.447693	0.958209	0.0185398	-0.0485786	-0.000900635	0.121159	-0.321361	-0.0277673	-0.905045	-0.923797	-1.36841	0.00770952	2.11297	-0.98976	-2.09134
AHNAK	K.VKVPEVDVR.G_2		1.02742	-2.16277	0.722516	-2.95463	-2.25717	-4.07358	0.0612567	1.21285	-2.95752	-3.58701	0.121159	-0.321361	-0.0277673	-0.905045	-0.923797	-1.36841	0.00770952	2.11297	-0.98976	-2.09134
AHNAK	K.VNVEAPDVNLEGLGGK.L_2		-0.188557	0.821028	-0.0477743	-3.26263	-3.22056	-3.00987	0.000495775	3.30472	-3.35925	-11.1014	0.121159	-0.321361	-0.0277673	-0.905045	-0.923797	-1.36841	0.00770952	2.11297	-0.98976	-2.09134
AHNAK	K.VPDVDIK.G_1		0.404785	0.155785	0.0623737	-0.662613	-2.01126	-0.711838	0.042048	1.37625	-1.33622	-1.83898	0.121159	-0.321361	-0.0277673	-0.905045	-0.923797	-1.36841	0.00770952	2.11297	-0.98976	-2.09134
AHNAK	K.VQANLGAPDINIEGLDAK.V_2		0.403856	0.148921	0.127667	-1.03014	-1.30461	-0.646948	0.00438534	2.358	-1.22071	-2.87844	0.121159	-0.321361	-0.0277673	-0.905045	-0.923797	-1.36841	0.00770952	2.11297	-0.98976	-2.09134
AHNAK	K.VSAPGVQGDVK.G_2		0.426161	0.823401	-1.09566	-0.432276	-0.259201	-0.977932	0.38497	0.414573	-0.60777	-0.251965	0.121159	-0.321361	-0.0277673	-0.905045	-0.923797	-1.36841	0.00770952	2.11297	-0.98976	-2.09134
AHNAK	K.VSGPDLDLNLK.G_2		0.260061	0.140808	0.268473	1.35312	1.08757	0.273614	0.105751	0.975717	0.681654	0.665101	0.121159	-0.321361	-0.0277673	-0.905045	-0.923797	-1.36841	0.00770952	2.11297	-0.98976	-2.09134
AHNAK	K.VSM[+15.99492]PDVDLNLK.G_2		0.225561	0.362443	0.0617422	0.602817	-0.826038	-0.825179	0.307137	0.512667	-0.566049	-0.290195	0.121159	-0.321361	-0.0277673	-0.905045	-0.923797	-1.36841	0.00770952	2.11297	-0.98976	-2.09134
AHNAK	K.VSM[+15.99492]PDVELNLK.S_2		1.09972	-0.174531	-0.841566	-1.14349	-1.36325	-1.79933	0.0716803	1.1446	-1.46324	-1.67482	0.121159	-0.321361	-0.0277673	-0.905045	-0.923797	-1.36841	0.00770952	2.11297	-0.98976	-2.09134
AHNAK	K.VSMPDVDLNLK.G_2		1.06411	-0.513756	-0.297978	0.211206	-0.117859	-0.484975	0.707875	0.150044	-0.21467	-0.0322099	0.121159	-0.321361	-0.0277673	-0.905045	-0.923797	-1.36841	0.00770952	2.11297	-0.98976	-2.09134
AHNAK	K.VSVGAPDLSLEASEGSIK.L_2		-0.00935996	1.00842	-0.681354	-0.993716	-0.437731	-1.7547	0.133662	0.873992	-1.16795	-1.02078	0.121159	-0.321361	-0.0277673	-0.905045	-0.923797	-1.36841	0.00770952	2.11297	-0.98976	-2.09134
AHNAK	K.VTAPDVDLHLK.A_2		0.546349	-0.321313	0.389042	-0.187293	-0.86145	-2.02362	0.109531	0.960464	-1.22881	-1.18023	0.121159	-0.321361	-0.0277673	-0.905045	-0.923797	-1.36841	0.00770952	2.11297	-0.98976	-2.09134
AHNAK	R.AGAISASGPELQGAGHSK.L_2		0.987852	-0.674354	1.63722e-06	0.526443	0.0874716	-0.667268	0.8473	0.0719628	-0.122284	-0.00879991	0.121159	-0.321361	-0.0277673	-0.905045	-0.923797	-1.36841	0.00770952	2.11297	-0.98976	-2.09134
AHNAK	R.AGAISASGPELQGAGHSK.L_3		1.02802	-0.822001	0.0440348	-0.532398	-3.0282	-3.64703	0.0850655	1.07025	-2.48589	-2.66052	0.121159	-0.321361	-0.0277673	-0.905045	-0.923797	-1.36841	0.00770952	2.11297	-0.98976	-2.09134
AHNAK	R.AVEVQGPSLESGDHGK.I_2		0.311543	0.607832	-0.430245	-1.9662	-1.56008	-2.15775	0.00442594	2.35399	-2.05772	-4.84386	0.121159	-0.321361	-0.0277673	-0.905045	-0.923797	-1.36841	0.00770952	2.11297	-0.98976	-2.09134
AHNAK	R.AVEVQGPSLESGDHGK.I_3		0.779861	0.0969349	-0.464622	-0.448752	-0.920701	-1.58494	0.082948	1.08119	-1.12219	-1.2133	0.121159	-0.321361	-0.0277673	-0.905045	-0.923797	-1.36841	0.00770952	2.11297	-0.98976	-2.09134
AHNAK	R.DDGVFVQEVTQNSPAAR.T_2		0.610096	-0.957331	0.744337	-0.720466	-1.54926	-2.24315	0.0799769	1.09704	-1.63666	-1.79547	0.121159	-0.321361	-0.0277673	-0.905045	-0.923797	-1.36841	0.00770952	2.11297	-0.98976	-2.09134
AHNAK	R.EFSGPSTPTGTLEFEGGEVSLEGGK.V_2		0.211694	0.648493	-0.464464	1.73173	2.98704	-1.59293	0.552254	0.257861	0.910039	0.234663	0.121159	-0.321361	-0.0277673	-0.905045	-0.923797	-1.36841	0.00770952	2.11297	-0.98976	-2.09134
AHNAK	R.ELLLPNWQGSGSHGLTIAQR.D_2		0.687472	-0.759337	0.581865	1.63659	0.0282258	-1.22831	0.980682	0.00847167	-0.0244963	-0.000207525	0.121159	-0.321361	-0.0277673	-0.905045	-0.923797	-1.36841	0.00770952	2.11297	-0.98976	-2.09134
AHNAK	R.ELLLPNWQGSGSHGLTIAQR.D_3		1.05953	-0.563191	-0.228365	-0.236553	-1.22611	-1.01768	0.188835	0.723917	-0.916106	-0.663185	0.121159	-0.321361	-0.0277673	-0.905045	-0.923797	-1.36841	0.00770952	2.11297	-0.98976	-2.09134
AHNAK	R.EM[+15.99492]GVDVHFPK.A_2		0.0758741	-0.260283	0.826413	-1.56522	-1.62873	-2.47204	0.00838939	2.07627	-2.10267	-4.3657	0.121159	-0.321361	-0.0277673	-0.905045	-0.923797	-1.36841	0.00770952	2.11297	-0.98976	-2.09134
AHNAK	R.GGVQVPAVDISSSLGGR.A_2		-1.37649	1.2541	0.245676	-1.26001	-1.86636	-1.91943	0.0960671	1.01743	-1.72304	-1.75306	0.121159	-0.321361	-0.0277673	-0.905045	-0.923797	-1.36841	0.00770952	2.11297	-0.98976	-2.09134
AHNAK	R.GPSLQGDLAVSGDIK.C_2		-0.201336	0.38128	0.49692	0.566519	1.2797	0.240942	0.278484	0.5552	0.470098	0.260999	0.121159	-0.321361	-0.0277673	-0.905045	-0.923797	-1.36841	0.00770952	2.11297	-0.98976	-2.09134
AHNAK	R.HELTEISNVDVETQSGK.T_2		0.0556841	0.192742	0.479914	1.3137	1.44286	0.590232	0.0409001	1.38828	0.872818	1.21171	0.121159	-0.321361	-0.0277673	-0.905045	-0.923797	-1.36841	0.00770952	2.11297	-0.98976	-2.09134
AHNAK	R.HELTEISNVDVETQSGK.T_3		0.226008	0.0760705	0.383501	1.15677	0.716473	0.321254	0.122083	0.913346	0.502971	0.459387	0.121159	-0.321361	-0.0277673	-0.905045	-0.923797	-1.36841	0.00770952	2.11297	-0.98976	-2.09134
AHNAK	R.ISAPNVDFNLEGPK.V_2		0.113241	0.426051	0.15997	-0.645199	-0.197436	-0.862872	0.021504	1.66748	-0.80159	-1.33664	0.121159	-0.321361	-0.0277673	-0.905045	-0.923797	-1.36841	0.00770952	2.11297	-0.98976	-2.09134
AHNAK	R.ISM[+15.99492]SEVDLNVAAPK.V_2		-0.237741	0.704224	0.168338	1.56699	0.921099	0.42676	0.150609	0.82215	0.760011	0.624843	0.121159	-0.321361	-0.0277673	-0.905045	-0.923797	-1.36841	0.00770952	2.11297	-0.98976	-2.09134
AHNAK	R.ISMSEVDLNVAAPK.V_2		0.428089	0.058768	0.175473	0.975657	1.40424	0.814757	0.0151126	1.82066	0.844107	1.53683	0.121159	-0.321361	-0.0277673	-0.905045	-0.923797	-1.36841	0.00770952	2.11297	-0.98976	-2.09134
AHNAK	R.LKSEDGVEGDLGETQSR.T_2		0.209773	0.525229	-0.125656	-0.268927	-0.0234683	0.1537	0.328672	0.483237	-0.249347	-0.120493	0.121159	-0.321361	-0.0277673	-0.905045	-0.923797	-1.36841	0.00770952	2.11297	-0.98976	-2.09134
AHNAK	R.LPSGSGAASPTGSAVDIR.A_2		0.463879	0.182749	-0.029671	-1.26398	-2.23989	-0.390309	0.0530291	1.27549	-1.50371	-1.91797	0.121159	-0.321361	-0.0277673	-0.905045	-0.923797	-1.36841	0.00770952	2.11297	-0.98976	-2.09134
AHNAK	R.VDIETPNLEGTLTGPR.L_2		0.427928	0.342445	-0.183041	0.284618	-0.210663	-0.578209	0.31182	0.506096	-0.363862	-0.184149	0.121159	-0.321361	-0.0277673	-0.905045	-0.923797	-1.36841	0.00770952	2.11297	-0.98976	-2.09134
AHNAK	R.VSAPEVS[+656.22761]VGHK.G_2	TRUE	-1.00489	1.2901	-0.0801744	0.392899	0.01681	-0.696037	0.835494	0.0780564	-0.163788	-0.0127847	0.121159	-0.321361	-0.0277673	-0.905045	-0.923797	-1.36841	0.00770952	2.11297	-0.98976	-2.09134
AHNAK	R.VSAPEVSVGHK.G_2		0.141161	-0.495098	0.942552	-2.06192	-1.47354	-1.06571	0.0269021	1.57021	-1.72993	-2.71636	0.121159	-0.321361	-0.0277673	-0.905045	-0.923797	-1.36841	0.00770952	2.11297	-0.98976	-2.09134
AHNAK	R.VTAYTVDVTGR.E_2		-0.353716	-0.0131257	1.00531	0.392817	2.09471	1.34608	0.171258	0.766349	1.06504	0.816196	0.121159	-0.321361	-0.0277673	-0.905045	-0.923797	-1.36841	0.00770952	2.11297	-0.98976	-2.09134
AHNAK2	K.LPEGPVPEGASLK.G_2		0.375848	0.116373	0.195773	2.30726	2.14214	1.15157	0.011345	1.9452	1.63765	3.18556	-0.4575	0.830977	-0.423564	1.00877	0.515092	1.8645	0.118815	0.925127	1.14615	1.06033
AHNAK2	K.M[+15.99492]SLSSM[+15.99492]EVDVQAPR.A_2		-0.823754	1.47686	-0.675591	0.903132	0.26854	3.43628	0.274583	0.561327	1.54348	0.866396	-0.4575	0.830977	-0.423564	1.00877	0.515092	1.8645	0.118815	0.925127	1.14615	1.06033
AHSA1	K.ETFLTSPEELYR.V_2		0.997853	-0.0941009	-0.728627	0.559279	0.199022	0.157372	0.6598	0.180588	0.246849	0.0445779	-0.711002	0.408613	0.792769	1.67338	1.02069	1.38985	0.070497	1.15183	1.19785	1.37971
AHSA1	K.FHM[+15.99492]VDGN[+0.98402]VSGEFTDLVPEK.H_2		1.18225	-0.640319	-0.482016	-0.883235	-1.45678	-1.09483	0.127169	0.895618	-1.16492	-1.04332	-0.711002	0.408613	0.792769	1.67338	1.02069	1.38985	0.070497	1.15183	1.19785	1.37971
AHSA1	K.LDGEASINNR.K_2		-2.83479	-9.7058	2.23624	-5.20282	-3.64733	1.65768	0.809837	0.0916022	1.03729	0.0950183	-0.711002	0.408613	0.792769	1.67338	1.02069	1.38985	0.070497	1.15183	1.19785	1.37971
AHSA1	K.LIFFYEWSVK.L_2		-0.367568	0.296888	0.766961	2.40282	1.88345	2.44341	0.00584828	2.23297	2.01113	4.4908	-0.711002	0.408613	0.792769	1.67338	1.02069	1.38985	0.070497	1.15183	1.19785	1.37971
AHSA1	R.ADATNVNNWHWTER.D_2		0.357189	-2.74186	1.53264	-1.62215	-2.68483	-2.09563	0.231128	0.636148	-1.85019	-1.177	-0.711002	0.408613	0.792769	1.67338	1.02069	1.38985	0.070497	1.15183	1.19785	1.37971
[truncated: 29,449 more rows]

## Sheet: Summary_Diff_O-glyco_Co_vs_Ctl
Gene	Control	Control	Control	Coculture	Coculture	Coculture	average coculture	Type	Sialyl	Glycoforms
[truncated: 43 more rows]

[truncated: 1 more sheets: OGP database]
