# Supplementary material for: Multiomics Analysis of Spatially Distinct Stromal Cells Reveals Tumor-Induced O-Glycosylation of the CDK4–pRB Axis in Fibroblasts at the Invasive Tumor Edge
Source: Oxford University Press journal article supplement (doi:10.1158/0008-5472.can-21-1705), 2021-12-01
Supplement: can-21-1705_supplementary_data_s6_supps7.xlsx [file can-21-1705_supplementary_data_s6_supps7.xlsx]

## Sheet: Genomics
	Metabolism	Cell death	Cell movement	Extracellular matrix	Immune regulation	Survival amd proliferation	Inflamamtion	Activation of Fbs	Signaling	Angiogenesis	Regulation of transcription
UDP-N-acetyl-D-galactosamine Biosynthesis II	1
Chondroitin Sulfate Biosynthesis (Late Stages)				1	1
Ceramide Signaling	1
Wnt/β-catenin Signaling			1
Dermatan Sulfate Biosynthesis (Late Stages)				1	1
Heparan Sulfate Biosynthesis				1	1
p38 MAPK Signaling	1		1			1	1
GNRH Signaling			1			1
P2Y Purigenic Receptor Signaling Pathway						1		1
cAMP-mediated signaling									1
PPARα/RXRα Activation	1	1
HGF Signaling						1		1
PPAR Signaling	1	1
Heparan Sulfate Biosynthesis (Late Stages)				1	1
PI3K/AKT Signaling						1
Sphingosine-1-phosphate Signaling									1
Renin-Angiotensin Signaling										1
VDR/RXR Activation											1
IL-15 Production					1		1
IL-17A Signaling in Fibroblasts					1		1
ErbB Signaling			1			1				1
Xenobiotic Metabolism Signaling	1
Regulation of the Epithelial-Mesenchymal Transition Pathway			1
FGF Signaling			1			1
Interferon Signaling					1		1	1
Superpathway of Inositol Phosphate Compounds									1
STAT3 Pathway					1	1	1		1
Total	6	2	6	4	8	8	5	3	4	2	1

## Sheet: Proteomics
	Protein fate	Metabolism	Stress	DNA damage and repair	AA and nucleotide metabolism	Immune	Inflamamtion	Scavenging	Cell cycle	Cell movement
Unfolded protein response	1
Mitochondrial Dysfunction		1	1
Role of PKR in Interferon Induction and Antiviral Response						1	1
Mismatch Repair in Eukaryotes				1
Pyrimidine Ribonucleotides De Novo Biosynthesis					1
Pyrimidine Ribonucleotides Interconversion					1
Phagosome Maturation								1
Cholesterol Biosynthesis		1
NRF2-mediated Oxidative Stress Response			1
Pentose Phosphate Pathway		1
Cdc42 Signaling			1					1
Lipid Antigen Presentation by CD1		1				1
Cell Cycle: G2/M DNA Damage Checkpoint Regulation									1
Adenine and Adenosine Salvage III					1
NER Pathway				1
Valine Degradation I					1
Isoleucine Degradation I					1
Ephrin Receptor Signaling										1
Purine Nucleotides De Novo Biosynthesis II					1
IL-8 Signaling		1				1	1		1	1
BAG2 Signaling Pathway	1
Actin Nucleation by ARP-WASP Complex										1
Epithelial Adherens Junction Signaling										1
Remodeling of Epithelial Adherens Junctions										1
Total	2	5	3	2	6	3	2	2	2	5

## Sheet: O-glyco
	Cell death	DNA damage and repair	Metabolism	Cell cycle regulation	Transcription
Necroptosis Signaling Pathway	1
GADD45 Signaling	1	1		1
RAN Signaling				1
Granzyme B Signaling	1
DNA Double-Strand Break Repair by Non-Homologous End Joining		1
Sirtuin Signaling Pathway	1	1	1	1
Glycogen Biosynthesis II (from UDP-D-Glucose)			1
GDP-mannose Biosynthesis			1
Cyclins and Cell Cycle Regulation	1			1
Oxidized GTP and dGTP Detoxification			1
Cell Cycle Regulation by BTG Family Proteins				1
DNA Methylation and Transcriptional Repression Signaling					1
D-mannose Degradation			1
Colanic Acid Building Blocks Biosynthesis			1
Cell Cycle: G1/S Checkpoint Regulation				1
Assembly of RNA Polymerase I Complex					1
p53 Signaling	1
Total	6	3	6	6	2
